# Supplementary material for: Seed Longevity is Controlled by Metacaspases
Source: Research Square preprint supplement (doi:10.21203/rs.3.rs-2836590/v1), 2023-05-02
Supplement: Supplementary file 1 [file 09f0f9ab673beb1a0c26f587.xlsx]

## Sheet: Sample Summary
================================================================================
Consensus Step Workflow
================================================================================
Result name: 190328ALLSAM05193_10mc933Dig2-CT3_LFQ_10over9_Tornkvist
Result file: E:\Proteomics\Data\Tornkvist Anna\190319ALLSAM05192_9WTcol0-CT_Arabidop_Tornkvist\190328ALLSAM05193_10mc933Dig2-CT3_LFQ_10over9_Tornkvist.pdResult
Description: Result filtered for high confident peptides, with enhanced peptide and protein annotations. Add FASTA file with common contaminants to the Protein Marker node. Quan abunaces are normalized to the same total peptide amount per channel and scaled, so that the average abunce per protein and peptide is 100.
Workflow based on template: CWF_Comprehensive_Enhanced Annotation_LFQ_and_Precursor_Quan_VLO
Creation date: 4/1/2019 1:55:50 PM
Created with Discoverer version: 2.3.0.523
------------------------------------------------------------------
The workflow tree:
------------------------------------------------------------------
|-(0) MSF Files
|-(1) PSM Grouper
|-(2) Peptide Validator
|-(3) Peptide and Protein Filter
|-(4) Protein Scorer
|-(5) Protein Grouping
|-(6) Peptide in Protein Annotation
|-(7) Protein FDR Validator
|-(9) Protein Marker
|-(10) Feature Mapper
|-(11) Precursor Ions Quantifier
Post-processing nodes:
--------------------------------
|-(12) Result Statistics
|-(13) Display Settings
|-(14) Data Distributions
------------------------------------------------------------------
Processing node 0: MSF Files
------------------------------------------------------------------
1. Storage Settings:
#NAME?
#NAME?
2. Merging of Identified Peptide and Proteins:
#NAME?
3. FASTA Title Line Display:
#NAME?
#NAME?
4. PSM Filters:
- Maximum Delta Cn: 0.05
- Maximum Rank: 0
- Maximum Delta Mass: 5 ppm
- 1. Score: Sequest HT: XCorr
- 1. Threshold: 0.7
Hidden Parameters:
#NAME?
------------------------------------------------------------------
Processing node 1: PSM Grouper
------------------------------------------------------------------
1. Peptide Group Modifications:
- Site Probability Threshold: 75
------------------------------------------------------------------
Processing node 2: Peptide Validator
------------------------------------------------------------------
1. General Validation Settings:
#NAME?
- Target FDR (Strict) for PSMs: 0.01
- Target FDR (Relaxed) for PSMs: 0.05
- Target FDR (Strict) for Peptides: 0.01
- Target FDR (Relaxed) for Peptides: 0.05
2. Specific Validation Settings:
#NAME?
#NAME?
- Reset Confidences for Nodes without Decoy Search (Fixed score thresholds): False
------------------------------------------------------------------
Processing node 3: Peptide and Protein Filter
------------------------------------------------------------------
1. Peptide Filters:
#NAME?
- Keep Lower Confident PSMs: False
- Minimum Peptide Length: 6
- Remove Peptides Without Protein Reference: False
2. Protein Filters:
- Minimum Number of Peptide Sequences: 1
- Count Only Rank 1 Peptides: False
- Count Peptides Only for Top Scored Protein: False
------------------------------------------------------------------
Processing node 4: Protein Scorer
------------------------------------------------------------------
No parameters
------------------------------------------------------------------
Processing node 5: Protein Grouping
------------------------------------------------------------------
1. Protein Grouping:
- Apply strict parsimony principle: True
------------------------------------------------------------------
Processing node 6: Peptide in Protein Annotation
------------------------------------------------------------------
1. Flanking Residues:
- Annotate Flanking Residues of the Peptide: True
- Number Flanking Residues in Connection Tables: 1
2. Modifications in Peptide:
#NAME?
3. Modifications in Protein:
#NAME?
#NAME?
- Report Only PTMs: True
4. Positions in Protein:
#NAME?
------------------------------------------------------------------
Processing node 7: Protein FDR Validator
------------------------------------------------------------------
1. Confidence Thresholds:
- Target FDR (Strict): 0.01
- Target FDR (Relaxed): 0.05
------------------------------------------------------------------
Processing node 9: Protein Marker
------------------------------------------------------------------
1. Contaminant Database:
#NAME?
5. Annotate Species:
- As Species Map: False
- As Species Names: False
6. Mark Additional Entities:
- Annotation Groups: False
- Pathway Groups: False
- Modification Sites: True
- Peptide Isoform Groups: True
------------------------------------------------------------------
Processing node 10: Feature Mapper
------------------------------------------------------------------
1. Chromatographic Alignment:
- Perform RT Alignment: True
- Maximum RT Shift [min]: 5
- Mass Tolerance: 10 ppm
#NAME?
2. Feature Linking and Mapping:
- RT Tolerance [min]: 0
- Mass Tolerance: 0 ppm
- Min. S/N Threshold: 5
------------------------------------------------------------------
Processing node 11: Precursor Ions Quantifier
------------------------------------------------------------------
1. General Quantification Settings:
#NAME?
- Consider Protein Groups for Peptide Uniqueness: True
- Reject Quan Results with Missing Channels: False
2. Precursor Quantification:
#NAME?
- Min. # Replicate Features [%]: 0
3. Normalization and Scaling:
#NAME?
#NAME?
4. Exclude Peptides from Protein Quantification:
#NAME?
#NAME?
#NAME?
5. Quan Rollup and Hypothesis Testing:
#NAME?
- N for Top N: 1
#NAME?
- Maximum Allowed Fold Change: 100
#NAME?
#NAME?
6. Quan Ratio Distributions:
- 1st Fold Change Threshold: 1.5
- 2nd Fold Change Threshold: 2
- 3rd Fold Change Threshold: 6
- 4th Fold Change Threshold: 8
- 5th Fold Change Threshold: 10
------------------------------------------------------------------
Processing node 12: Result Statistics
------------------------------------------------------------------
No parameters
------------------------------------------------------------------
Processing node 13: Display Settings
------------------------------------------------------------------
1. General:
- Filter Set:
	### Filter Set MasterProteinFilter.filterset contains the following filters:
	### Row Filter for TargetProtein:
	### Master is equal to Master
	###
	'magellan filter set' 1 'MasterProteinFilter.filterset' FiltersetProperties 1 'LastFileName' 'C:\Users\frank.berg\Desktop\MasterProteinFilter.filterset' Filter 'TargetProtein' 1 NARY_AND 1 = FilterConditionProperties 1 'NamedComparableFilterCondition/DisplayPropertyHint' 'Master' property 'Thermo.PD.EntityDataFramework.MasterProteinAssessment, Thermo.Magellan.EntityDataFramework' 'IsMasterProtein…
------------------------------------------------------------------
Processing node 14: Data Distributions
------------------------------------------------------------------
1. ID Distributions (Bottom-up):
#NAME?
------------------------------------------------------------------
Workflow messages:
------------------------------------------------------------------
2019-04-01 14:18:00	Job Execution:	Processing E:\Proteomics\Data\Tornkvist Anna\190319ALLSAM05192_9WTcol0-CT_Arabidop_Tornkvist\190328ALLSAM05193_10mc933Dig2-CT3_LFQ_10over9_Tornkvist.pdResult
2019-04-01 14:18:00	(0): MSF Files:	E:\Proteomics\Data\Tornkvist Anna\190319ALLSAM05192_9WTcol0-CT_Arabidop_Tornkvist\190328ALLSAM05193_10mc933Dig2-CT3_LFQ_10over9_Tornkvist.msf
2019-04-01 14:18:00	(0): MSF Files:	All 1 files are ready for processing.
2019-04-01 14:18:00	(0): MSF Files:	Warnings reported in at least one input processing workflow (check processing summary).
2019-04-01 14:18:00	(0): MSF Files:	Start transferring results of 1 msf files...
2019-04-01 14:18:00	(0): MSF Files:	Transferred 9562 Proteins to result file in 6 s.
2019-04-01 14:18:00	(0): MSF Files:	Transferred 9048 Decoy Proteins to result file in 5.6 s.
2019-04-01 14:18:00	(0): MSF Files:	Added 66192 Mass Spectra to result file.
2019-04-01 14:18:00	(0): MSF Files:	Added 191099 traces to result file.
2019-04-01 14:18:00	(0): MSF Files:	Added 2 Input Files to result file.
2019-04-01 14:18:00	(0): MSF Files:	Added 98266 PSMs to result file.
2019-04-01 14:18:00	(0): MSF Files:	Added 108066 Decoy PSMs to result file.
2019-04-01 14:18:00	(0): MSF Files:	Added 66620 MS/MS Spectrum Info to result file.
2019-04-01 14:18:00	(0): MSF Files:	Added 6 Specialized Traces to result file.
2019-04-01 14:18:00	(0): MSF Files:	Added 45490 LCMS Features to result file.
2019-04-01 14:18:00	(0): MSF Files:	Added 247302 LCMS Peaks to result file.
2019-04-01 14:19:00	(0): MSF Files:	Copying data took 55.6 s.
2019-04-01 14:19:00	(0): MSF Files:	Finding unique sequences took 3.7 s.
2019-04-01 14:19:00	(0): MSF Files:	Filtering PSMs took 2.9 s.
2019-04-01 14:19:00	(0): MSF Files:	Filter 0/2787 Proteins (2787 excluded) took: 539.9 ms
2019-04-01 14:19:00	(0): MSF Files:	Filter 0/3060 Decoy Proteins (3060 excluded) took: 324.2 ms
2019-04-01 14:19:00	(0): MSF Files:	Filtering proteins took 891.2 ms.
2019-04-01 14:19:00	(0): MSF Files:	-- Total execution of MSF Files (0) took 1 min 15 s --
2019-04-01 14:19:00	(1): PSM Grouper:	Grouping 'PSMs'
2019-04-01 14:19:00	(1): PSM Grouper:	Found 11876 Peptide Groups.
2019-04-01 14:19:00	(1): PSM Grouper:	Grouping 'Decoy PSMs'
2019-04-01 14:19:00	(1): PSM Grouper:	Found 8777 Decoy Peptide Groups.
2019-04-01 14:19:00	(1): PSM Grouper:	-- Total execution of PSM Grouper (1) took 27.5 s --
2019-04-01 14:19:00	(2): Peptide Validator:	Start PSM and Peptide validation in 'Automatic (Control peptide level error rate if possible)' mode...
2019-04-01 14:19:00	(2): Peptide Validator:	Updated PSM confidences in 1.3 s.
2019-04-01 14:19:00	(2): Peptide Validator:	Use svm score for 'peptide' qvality run.
2019-04-01 14:20:00	(2): Peptide Validator:	Updated peptide confidences using qvality in 9.4 s.
2019-04-01 14:20:00	(2): Peptide Validator:	Calculating Mascot thresholds.
2019-04-01 14:20:00	(2): Peptide Validator:	-- Total execution of Peptide Validator (2) took 10.9 s --
2019-04-01 14:20:00	(3): Peptide and Protein Filter:	Filter Peptide Groups
2019-04-01 14:20:00	(3): Peptide and Protein Filter:	Filter 2933/11876 Peptide Groups (8943 excluded) and 17222/29552 PSMs (12330 excluded) took 1.4 s
2019-04-01 14:20:00	(3): Peptide and Protein Filter:	Filtering Proteins
2019-04-01 14:20:00	(3): Peptide and Protein Filter:	Filter 1129/6775 Proteins (5646 excluded) took 508.1 ms
2019-04-01 14:20:00	(3): Peptide and Protein Filter:	Filter Decoy Peptide Groups
2019-04-01 14:20:00	(3): Peptide and Protein Filter:	Filter 26/8777 Decoy Peptide Groups (8751 excluded) and 49/11233 Decoy PSMs (11184 excluded) took 750.9 ms
2019-04-01 14:20:00	(3): Peptide and Protein Filter:	Filtering Decoy Proteins
2019-04-01 14:20:00	(3): Peptide and Protein Filter:	Filter 27/5988 Decoy Proteins (5961 excluded) took 272.3 ms
2019-04-01 14:20:00	(3): Peptide and Protein Filter:	Updating counts took 3.2 s.
2019-04-01 14:20:00	(3): Peptide and Protein Filter:	-- Total execution of Peptide and Protein Filter (3) took 6.9 s --
2019-04-01 14:20:00	(4): Protein Scorer:	Calculating Coverage and Counts
2019-04-01 14:20:00	(4): Protein Scorer:	Calculated counts and coverages in 684.4 ms.
2019-04-01 14:20:00	(4): Protein Scorer:	Scoring target proteins
2019-04-01 14:20:00	(4): Protein Scorer:	Scored 1129 proteins in 2 s.
2019-04-01 14:20:00	(4): Protein Scorer:	Scoring decoy proteins
2019-04-01 14:20:00	(4): Protein Scorer:	Scored 27 decoy proteins in 104.4 ms.
2019-04-01 14:20:00	(4): Protein Scorer:	-- Total execution of Protein Scorer (4) took 2.9 s --
2019-04-01 14:20:00	(5): Protein Grouping:	Retrieving 742 protein groups took 48.4 ms.
2019-04-01 14:20:00	(5): Protein Grouping:	Storing, updating and connecting protein groups, PSMs and peptides took 2.2 s.
2019-04-01 14:20:00	(5): Protein Grouping:	Check 742 protein groups.
2019-04-01 14:20:00	(5): Protein Grouping:	Applying strict parsimony took 5 s.
2019-04-01 14:20:00	(5): Protein Grouping:	Found 738 protein groups.
2019-04-01 14:20:00	(5): Protein Grouping:	Retrieving 26 decoy protein groups took 6.8 ms.
2019-04-01 14:20:00	(5): Protein Grouping:	Storing, updating and connecting protein groups, PSMs and peptides took 975.1 ms.
2019-04-01 14:20:00	(5): Protein Grouping:	Found 26 decoy protein groups.
2019-04-01 14:20:00	(5): Protein Grouping:	-- Total execution of Protein Grouping (5) took 10 s --
2019-04-01 14:20:00	(6): Peptide in Protein Annotation:	Start retrieving flanking residues and positions...
2019-04-01 14:20:00	(6): Peptide in Protein Annotation:	Annotated PSMs/peptides for 1129 proteins.
2019-04-01 14:20:00	(6): Peptide in Protein Annotation:	Start annotating peptide groups with flanking residues and positions...
2019-04-01 14:20:00	(6): Peptide in Protein Annotation:	Annotate Peptide Groups items
2019-04-01 14:20:00	(6): Peptide in Protein Annotation:	Start calculating protein coverage...
2019-04-01 14:20:00	(6): Peptide in Protein Annotation:	-- Total execution of Peptide in Protein Annotation (6) took 20.1 s --
2019-04-01 14:20:00	(7): Protein FDR Validator:	Apply confidences based on protein scores of 1129 proteins.
2019-04-01 14:20:00	(7): Protein FDR Validator:	Calculating Sum PEP Score for Proteins
2019-04-01 14:20:00	(7): Protein FDR Validator:	Calculating Sum PEP Score for Decoy Proteins
2019-04-01 14:20:00	(7): Protein FDR Validator:	-- Total execution of Protein FDR Validator (7) took 1.2 s --
2019-04-01 14:20:00	(9): Protein Marker:	Start marking proteins...
2019-04-01 14:20:00	(9): Protein Marker:	Contaminants Detection took: 1.2 s
2019-04-01 14:20:00	(9): Protein Marker:	Annotating species names took: 13.5 ms
2019-04-01 14:20:00	(9): Protein Marker:	-- Total execution of Protein Marker (9) took 1.2 s --
2019-04-01 14:20:00	(10): Feature Mapper:	Extracting features
2019-04-01 14:20:00	(10): Feature Mapper:	Extracting LCMS features
2019-04-01 14:20:00	(10): Feature Mapper:	Extracting feature groups took 5.3 s.
2019-04-01 14:20:00	(10): Feature Mapper:	Start aligning 1 files ('F3') to reference file 'F4'...
2019-04-01 14:20:00	(10): Feature Mapper:	Calculating RT alignment took 8.8 s
2019-04-01 14:20:00	(10): Feature Mapper:	Start updating RTs...
2019-04-01 14:20:00	(10): Feature Mapper:	Updating RTs of LCMS Features took 876.8 ms.
2019-04-01 14:20:00	(10): Feature Mapper:	Updating RTs of LCMS Peaks took 4.4 s.
2019-04-01 14:21:00	(10): Feature Mapper:	Updating RTs of PSMs took 885.2 ms.
2019-04-01 14:21:00	(10): Feature Mapper:	Updating RTs of MS/MS Spectrum Info took 1.1 s.
2019-04-01 14:21:00	(10): Feature Mapper:	-- Performing retention time alignment took 16 s. --
2019-04-01 14:21:00	(10): Feature Mapper:	Extracting feature groups took 0.1 ms.
2019-04-01 14:21:00	(10): Feature Mapper:	Start aligning 1 files ('F3') to reference file 'F4'...
2019-04-01 14:21:00	(10): Feature Mapper:	Updating m/z values of LCMS Features took 666.3 ms.
2019-04-01 14:21:00	(10): Feature Mapper:	Updating m/z values of LCMS Peaks took 4 s.
2019-04-01 14:21:00	(10): Feature Mapper:	Updating m/z values of PSMs took 516.9 ms.
2019-04-01 14:21:00	(10): Feature Mapper:	-- Performing mass over charge alignment took 7.3 s. --
2019-04-01 14:21:00	(10): Feature Mapper:	Extracting feature groups took 0.1 ms.
2019-04-01 14:21:00	(10): Feature Mapper:	Start aligning 1 files ('F3') to reference file 'F4'...
2019-04-01 14:21:00	(10): Feature Mapper:	Updating area values of LCMS Features took 698 ms.
2019-04-01 14:21:00	(10): Feature Mapper:	Updating area values of LCMS Peaks took 3.8 s.
2019-04-01 14:21:00	(10): Feature Mapper:	-- Performing abundance alignment took 6.4 s. --
2019-04-01 14:21:00	(10): Feature Mapper:	Using RT tolerance of 2.00 min and mass tolerance of 4.7 ppm for mapping
2019-04-01 14:21:00	(10): Feature Mapper:	Mapping 1 Fraction(s)
2019-04-01 14:21:00	(10): Feature Mapper:	Mapping Fraction 1 of 1
2019-04-01 14:21:00	(10): Feature Mapper:	Mapping 1 Fraction(s) took 36.8 s
2019-04-01 14:21:00	(10): Feature Mapper:	-- Performing cross file mapping took 36.8 s. --
2019-04-01 14:21:00	(10): Feature Mapper:	Storing Top Apex RT for Peptide Groups
2019-04-01 14:21:00	(10): Feature Mapper:	Storing Top Apex RT for Peptide Groups took 911.5 ms
2019-04-01 14:21:00	(10): Feature Mapper:	-- Total execution of Feature Mapper (10) took 1 min 9 s --
2019-04-01 14:21:00	(11): Precursor Ions Quantifier:	Validating LCMS features
2019-04-01 14:21:00	(11): Precursor Ions Quantifier:	Validating Consensus Features
2019-04-01 14:21:00	(11): Precursor Ions Quantifier:	Validation of quantification results took 3.7 s
2019-04-01 14:21:00	(11): Precursor Ions Quantifier:	Updating spectrum match areas
2019-04-01 14:21:00	(11): Precursor Ions Quantifier:	Classify quan usage of PSMs
2019-04-01 14:21:00	(11): Precursor Ions Quantifier:	Classifying Peptide Groups quan usage
2019-04-01 14:21:00	(11): Precursor Ions Quantifier:	Classifying Peptide Groups quan usage for 2933 items took 516.3 ms
2019-04-01 14:21:00	(11): Precursor Ions Quantifier:	Resolving Razor Quan Results
2019-04-01 14:21:00	(11): Precursor Ions Quantifier:	Found 47 razor quan results.
2019-04-01 14:21:00	(11): Precursor Ions Quantifier:	Counting Razor Quan Results
2019-04-01 14:21:00	(11): Precursor Ions Quantifier:	Calculating Peptide Group Abundances
2019-04-01 14:21:00	(11): Precursor Ions Quantifier:	Classifying Protein Quan Usage
2019-04-01 14:21:00	(11): Precursor Ions Quantifier:	Counting Razor Peptides
2019-04-01 14:21:00	(11): Precursor Ions Quantifier:	Calculating Protein Abundances
2019-04-01 14:21:00	(11): Precursor Ions Quantifier:	Start normalization of abundance values...
2019-04-01 14:22:00	(11): Precursor Ions Quantifier:	Calculating normalization took 1 s
2019-04-01 14:22:00	(11): Precursor Ions Quantifier:	Calculating Normalized Peptide Group Abundances
2019-04-01 14:22:00	(11): Precursor Ions Quantifier:	Calculating Normalized Protein Abundances
2019-04-01 14:22:00	(11): Precursor Ions Quantifier:	Calculating and applying normalization took 1.5 s
2019-04-01 14:22:00	(11): Precursor Ions Quantifier:	Calculating ratios for Peptide Groups...
2019-04-01 14:22:00	(11): Precursor Ions Quantifier:	Calculating ratios for Proteins...
2019-04-01 14:22:00	(11): Precursor Ions Quantifier:	Start calculating p-values based on background for Peptide Groups...
2019-04-01 14:22:00	(11): Precursor Ions Quantifier:	Calculating p-values based on background took 5.2 s
2019-04-01 14:22:00	(11): Precursor Ions Quantifier:	Calculating p-values for Peptide Groups took 5.2 s.
2019-04-01 14:22:00	(11): Precursor Ions Quantifier:	Start calculating p-values based on background for Proteins...
2019-04-01 14:22:00	(11): Precursor Ions Quantifier:	Calculating p-values based on background took 495 ms
2019-04-01 14:22:00	(11): Precursor Ions Quantifier:	Calculating p-values for Proteins took 538.7 ms.
2019-04-01 14:22:00	(11): Precursor Ions Quantifier:	Precursor Ion Quantification took 14.9 s.
2019-04-01 14:22:00	(11): Precursor Ions Quantifier:	Preparing spectrum visualization took 470.4 ms.
2019-04-01 14:22:00	(11): Precursor Ions Quantifier:	-- Total execution of Precursor Ions Quantifier (11) took 15.4 s --
2019-04-01 14:22:00	(12): Result Statistics:	-- Total execution of Result Statistics (12) took 2.8 s --
2019-04-01 14:22:00	(13): Display Settings:	Applying display filter and layout
2019-04-01 14:22:00	(13): Display Settings:	-- Total execution of Display Settings (13) took 43.5 ms --
2019-04-01 14:22:00	(14): Data Distributions:	Calculating found in files
2019-04-01 14:22:00	(14): Data Distributions:	Calculating found for samples
2019-04-01 14:22:00	(14): Data Distributions:	Calculating found for sample groups
2019-04-01 14:22:00	(14): Data Distributions:	-- Total execution of Data Distributions (14) took 6.3 s --
2019-04-01 14:22:00	Job Execution:	Finalizing file took 8.3 s.
2019-04-01 14:22:00	Job Execution:	Finished E:\Proteomics\Data\Tornkvist Anna\190319ALLSAM05192_9WTcol0-CT_Arabidop_Tornkvist\190328ALLSAM05193_10mc933Dig2-CT3_LFQ_10over9_Tornkvist.pdResult
2019-04-01 14:22:00	Job Execution:	----- Total Job execution took: 4 min 18 s. -----
================================================================================
Processing Step A: Workflow
================================================================================
Result name: 190328ALLSAM05193_10mc933Dig2-CT3_LFQ_10over9_Tornkvist
Result file: E:\Proteomics\Data\Tornkvist Anna\190319ALLSAM05192_9WTcol0-CT_Arabidop_Tornkvist\190328ALLSAM05193_10mc933Dig2-CT3_LFQ_10over9_Tornkvist.msf
Description: Processing workflow for precursor-based quantification, using SequestHTwith Percolator validation. Specify the FASTA database, labels used, and any additional modifications.
Workflow based on template: PWF_LTQ_LFQ_SequestHT_CIDonly_VLO_Percolator
Creation date: 4/1/2019 1:55:48 PM
Created with Discoverer version: 2.3.0.523
------------------------------------------------------------------
The workflow tree:
------------------------------------------------------------------
|-(7) Spectrum Files
|-(1) Spectrum Selector
|-(6) Scan Event Filter
|-(2) Sequest HT
|-(3) Percolator
|-(4) Minora Feature Detector
------------------------------------------------------------------
Processing node 7: Spectrum Files
------------------------------------------------------------------
Input Data:
- File Name(s) (Hidden):
	E:\Proteomics\Data\Tornkvist Anna\190328ALLSAM05193_10mc933Dig2-CT3.raw
	E:\Proteomics\Data\Tornkvist Anna\190328ALLSAM05192_9WTcol0Dig2-CT3.raw
------------------------------------------------------------------
Processing node 1: Spectrum Selector
------------------------------------------------------------------
1. General Settings:
#NAME?
- Use Isotope Pattern in Precursor Reevaluation: True
#NAME?
2. Spectrum Properties Filter:
- Lower RT Limit: 0
- Upper RT Limit: 0
- First Scan: 0
- Last Scan: 0
- Lowest Charge State: 0
- Highest Charge State: 0
- Min. Precursor Mass: 350 Da
- Max. Precursor Mass: 5000 Da
- Total Intensity Threshold: 0
- Minimum Peak Count: 1
3. Scan Event Filters:
#NAME?
- Min. Collision Energy: 0
- Max. Collision Energy: 1000
#NAME?
4. Peak Filters:
- S/N Threshold (FT-only): 1.5
5. Replacements for Unrecognized Properties:
#NAME?
#NAME?
#NAME?
#NAME?
- Unrecognized Polarity Replacements: +
- Unrecognized MS Resolution@200 Replacements: 60000
- Unrecognized MSn Resolution@200 Replacements: 30000
6. Precursor Pattern Extraction:
- Precursor Clipping Range Before: 2.5 Da
- Precursor Clipping Range After: 5.5 Da
------------------------------------------------------------------
Processing node 6: Scan Event Filter
------------------------------------------------------------------
Filter Settings:
#NAME?
#NAME?
#NAME?
- Min. Collision Energy: 0
- Max. Collision Energy: 1000
------------------------------------------------------------------
Processing node 2: Sequest HT
------------------------------------------------------------------
1. Input Data:
- Protein Database:
	Contaminants2Append.fasta
	Uniprot-proteome_ArabidopsisThaliana_UP000006548_2019.fasta
#NAME?
- Max. Missed Cleavage Sites: 2
- Min. Peptide Length: 6
- Max. Peptide Length: 50
- Max. Number of Peptides Reported: 10
2. Tolerances:
- Precursor Mass Tolerance: 10 ppm
- Fragment Mass Tolerance: 0.5 Da
- Use Average Precursor Mass: False
- Use Average Fragment Mass: False
3. Spectrum Matching:
- Use Neutral Loss a Ions: True
- Use Neutral Loss b Ions: True
- Use Neutral Loss y Ions: True
- Use Flanking Ions: True
- Weight of a Ions: 0
- Weight of b Ions: 1
- Weight of c Ions: 0
- Weight of x Ions: 0
- Weight of y Ions: 1
- Weight of z Ions: 0
4. Dynamic Modifications:
- Max. Equal Modifications Per Peptide: 3
- Max. Dynamic Modifications Per Peptide: 4
- 1. Dynamic Modification: Oxidation / +15.995 Da (M)
- 2. Dynamic Modification: Deamidated / +0.984 Da (N, Q)
6. Dynamic Modifications (protein terminus):
- 1. N-Terminal Modification: Acetyl / +42.011 Da (N-Terminus)
7. Static Modifications:
- 1. Static Modification: Carbamidomethyl / +57.021 Da (C)
------------------------------------------------------------------
Processing node 3: Percolator
------------------------------------------------------------------
1. Target/Decoy Strategy:
#NAME?
#NAME?
2. Input Data:
- Maximum Delta Cn: 0.05
- Maximum Rank: 0
3. FDR Targets:
- Target FDR (Strict): 0.01
- Target FDR (Relaxed): 0.05
------------------------------------------------------------------
Processing node 4: Minora Feature Detector
------------------------------------------------------------------
1. Peak & Feature Detection:
- Min. Trace Length: 5
- Max. ΔRT of Isotope Pattern Multiplets [min]: 0.2
2. Feature to ID Linking:
#NAME?
------------------------------------------------------------------
Workflow messages:
------------------------------------------------------------------
2019-04-01 13:55:00	Job Execution:	Processing E:\Proteomics\Data\Tornkvist Anna\190319ALLSAM05192_9WTcol0-CT_Arabidop_Tornkvist\190328ALLSAM05193_10mc933Dig2-CT3_LFQ_10over9_Tornkvist.msf
2019-04-01 13:55:00	(1): Spectrum Selector:	Profile spectra are not sent.
2019-04-01 13:55:00	(1): Spectrum Selector:	Reading from file 1 of 2 F4: E:\Proteomics\Data\Tornkvist Anna\190328ALLSAM05193_10mc933Dig2-CT3.raw (35238 spectra total)
2019-04-01 13:55:00	(6): Scan Event Filter:	1000 of 1000 spectra pass this filter. (1000/1000) total)
2019-04-01 13:55:00	(2): Sequest HT:	Sequence Database: Contaminants2Append.fasta
2019-04-01 13:55:00	(2): Sequest HT:	Sequence Database: Uniprot-proteome_ArabidopsisThaliana_UP000006548_2019.fasta
2019-04-01 13:55:00	(6): Scan Event Filter:	1000 of 1000 spectra pass this filter. (2000/2000) total)
2019-04-01 13:56:00	(6): Scan Event Filter:	1000 of 1000 spectra pass this filter. (3000/3000) total)
2019-04-01 13:56:00	(6): Scan Event Filter:	1000 of 1000 spectra pass this filter. (4000/4000) total)
2019-04-01 13:56:00	(6): Scan Event Filter:	1000 of 1000 spectra pass this filter. (5000/5000) total)
2019-04-01 13:56:00	(6): Scan Event Filter:	1000 of 1000 spectra pass this filter. (6000/6000) total)
2019-04-01 13:56:00	(6): Scan Event Filter:	1000 of 1000 spectra pass this filter. (7000/7000) total)
2019-04-01 13:56:00	(6): Scan Event Filter:	1000 of 1000 spectra pass this filter. (8000/8000) total)
2019-04-01 13:56:00	(6): Scan Event Filter:	1000 of 1000 spectra pass this filter. (9000/9000) total)
2019-04-01 13:56:00	(6): Scan Event Filter:	1000 of 1000 spectra pass this filter. (10000/10000) total)
2019-04-01 13:56:00	(6): Scan Event Filter:	1000 of 1000 spectra pass this filter. (11000/11000) total)
2019-04-01 13:56:00	(6): Scan Event Filter:	1000 of 1000 spectra pass this filter. (12000/12000) total)
2019-04-01 13:56:00	(6): Scan Event Filter:	1000 of 1000 spectra pass this filter. (13000/13000) total)
2019-04-01 13:56:00	(6): Scan Event Filter:	1000 of 1000 spectra pass this filter. (14000/14000) total)
2019-04-01 13:57:00	(6): Scan Event Filter:	1000 of 1000 spectra pass this filter. (15000/15000) total)
2019-04-01 13:57:00	(6): Scan Event Filter:	1000 of 1000 spectra pass this filter. (16000/16000) total)
2019-04-01 13:57:00	(6): Scan Event Filter:	1000 of 1000 spectra pass this filter. (17000/17000) total)
2019-04-01 13:57:00	(6): Scan Event Filter:	1000 of 1000 spectra pass this filter. (18000/18000) total)
2019-04-01 13:57:00	(6): Scan Event Filter:	1000 of 1000 spectra pass this filter. (19000/19000) total)
2019-04-01 13:57:00	(6): Scan Event Filter:	1000 of 1000 spectra pass this filter. (20000/20000) total)
2019-04-01 13:57:00	(6): Scan Event Filter:	1000 of 1000 spectra pass this filter. (21000/21000) total)
2019-04-01 13:57:00	(6): Scan Event Filter:	1000 of 1000 spectra pass this filter. (22000/22000) total)
2019-04-01 13:57:00	(6): Scan Event Filter:	1000 of 1000 spectra pass this filter. (23000/23000) total)
2019-04-01 13:58:00	(6): Scan Event Filter:	1000 of 1000 spectra pass this filter. (24000/24000) total)
2019-04-01 13:58:00	(6): Scan Event Filter:	1000 of 1000 spectra pass this filter. (25000/25000) total)
2019-04-01 13:58:00	(6): Scan Event Filter:	1000 of 1000 spectra pass this filter. (26000/26000) total)
2019-04-01 13:58:00	(6): Scan Event Filter:	1000 of 1000 spectra pass this filter. (27000/27000) total)
2019-04-01 13:58:00	(6): Scan Event Filter:	1000 of 1000 spectra pass this filter. (28000/28000) total)
2019-04-01 13:58:00	(6): Scan Event Filter:	1000 of 1000 spectra pass this filter. (29000/29000) total)
2019-04-01 13:58:00	(6): Scan Event Filter:	1000 of 1000 spectra pass this filter. (30000/30000) total)
2019-04-01 13:58:00	(6): Scan Event Filter:	1000 of 1000 spectra pass this filter. (31000/31000) total)
2019-04-01 13:58:00	(6): Scan Event Filter:	1000 of 1000 spectra pass this filter. (32000/32000) total)
2019-04-01 13:59:00	(6): Scan Event Filter:	1000 of 1000 spectra pass this filter. (33000/33000) total)
2019-04-01 13:59:00	(1): Spectrum Selector:	There were 1 invalid spectra in the file F4: E:\Proteomics\Data\Tornkvist Anna\190328ALLSAM05193_10mc933Dig2-CT3.raw.
2019-04-01 13:59:00	(6): Scan Event Filter:	491 of 491 spectra pass this filter. (33491/33491) total)
2019-04-01 13:59:00	(1): Spectrum Selector:	Sent 33491 spectra from file F4.
2019-04-01 13:59:00	(1): Spectrum Selector:	Reading from file 2 of 2 F3: E:\Proteomics\Data\Tornkvist Anna\190328ALLSAM05192_9WTcol0Dig2-CT3.raw (35059 spectra total)
2019-04-01 13:59:00	(6): Scan Event Filter:	1000 of 1000 spectra pass this filter. (34491/34491) total)
2019-04-01 13:59:00	(6): Scan Event Filter:	1000 of 1000 spectra pass this filter. (35491/35491) total)
2019-04-01 13:59:00	(6): Scan Event Filter:	1000 of 1000 spectra pass this filter. (36491/36491) total)
2019-04-01 13:59:00	(6): Scan Event Filter:	1000 of 1000 spectra pass this filter. (37491/37491) total)
2019-04-01 13:59:00	(6): Scan Event Filter:	1000 of 1000 spectra pass this filter. (38491/38491) total)
2019-04-01 13:59:00	(6): Scan Event Filter:	1000 of 1000 spectra pass this filter. (39491/39491) total)
2019-04-01 13:59:00	(6): Scan Event Filter:	1000 of 1000 spectra pass this filter. (40491/40491) total)
2019-04-01 13:59:00	(6): Scan Event Filter:	1000 of 1000 spectra pass this filter. (41491/41491) total)
2019-04-01 13:59:00	(6): Scan Event Filter:	1000 of 1000 spectra pass this filter. (42491/42491) total)
2019-04-01 13:59:00	(6): Scan Event Filter:	1000 of 1000 spectra pass this filter. (43491/43491) total)
2019-04-01 13:59:00	(6): Scan Event Filter:	1000 of 1000 spectra pass this filter. (44491/44491) total)
2019-04-01 14:00:00	(6): Scan Event Filter:	1000 of 1000 spectra pass this filter. (45491/45491) total)
2019-04-01 14:00:00	(6): Scan Event Filter:	1000 of 1000 spectra pass this filter. (46491/46491) total)
2019-04-01 14:00:00	(6): Scan Event Filter:	1000 of 1000 spectra pass this filter. (47491/47491) total)
2019-04-01 14:00:00	(6): Scan Event Filter:	1000 of 1000 spectra pass this filter. (48491/48491) total)
2019-04-01 14:00:00	(6): Scan Event Filter:	1000 of 1000 spectra pass this filter. (49491/49491) total)
2019-04-01 14:00:00	(6): Scan Event Filter:	1000 of 1000 spectra pass this filter. (50491/50491) total)
2019-04-01 14:00:00	(6): Scan Event Filter:	1000 of 1000 spectra pass this filter. (51491/51491) total)
2019-04-01 14:00:00	(6): Scan Event Filter:	1000 of 1000 spectra pass this filter. (52491/52491) total)
2019-04-01 14:00:00	(6): Scan Event Filter:	1000 of 1000 spectra pass this filter. (53491/53491) total)
2019-04-01 14:00:00	(6): Scan Event Filter:	1000 of 1000 spectra pass this filter. (54491/54491) total)
2019-04-01 14:01:00	(6): Scan Event Filter:	1000 of 1000 spectra pass this filter. (55491/55491) total)
2019-04-01 14:01:00	(6): Scan Event Filter:	1000 of 1000 spectra pass this filter. (56491/56491) total)
2019-04-01 14:01:00	(6): Scan Event Filter:	1000 of 1000 spectra pass this filter. (57491/57491) total)
2019-04-01 14:01:00	(6): Scan Event Filter:	1000 of 1000 spectra pass this filter. (58491/58491) total)
2019-04-01 14:01:00	(6): Scan Event Filter:	1000 of 1000 spectra pass this filter. (59491/59491) total)
2019-04-01 14:01:00	(6): Scan Event Filter:	1000 of 1000 spectra pass this filter. (60491/60491) total)
2019-04-01 14:01:00	(6): Scan Event Filter:	1000 of 1000 spectra pass this filter. (61491/61491) total)
2019-04-01 14:01:00	(6): Scan Event Filter:	1000 of 1000 spectra pass this filter. (62491/62491) total)
2019-04-01 14:01:00	(6): Scan Event Filter:	1000 of 1000 spectra pass this filter. (63491/63491) total)
2019-04-01 14:02:00	(6): Scan Event Filter:	1000 of 1000 spectra pass this filter. (64491/64491) total)
2019-04-01 14:02:00	(6): Scan Event Filter:	1000 of 1000 spectra pass this filter. (65491/65491) total)
2019-04-01 14:02:00	(6): Scan Event Filter:	1000 of 1000 spectra pass this filter. (66491/66491) total)
2019-04-01 14:02:00	(6): Scan Event Filter:	129 of 129 spectra pass this filter. (66620/66620) total)
2019-04-01 14:02:00	(1): Spectrum Selector:	Sent 33129 spectra from file F3.
2019-04-01 14:02:00	(1): Spectrum Selector:	Sent 66620 spectra from 2 files (processing time: 1 min 22 s).
2019-04-01 14:02:00	(1): Spectrum Selector:	-- Total execution of Spectrum Selector (1) took 6 min 28 s --
2019-04-01 14:02:00	(6): Scan Event Filter:	66620 of 66620 spectra passed this filter.
2019-04-01 14:02:00	(6): Scan Event Filter:	-- Total execution of Scan Event Filter (6) took 90.5 ms --
2019-04-01 14:02:00	(2): Sequest HT:	Storing spectra took 4 min 55 s.
2019-04-01 14:02:00	(2): Sequest HT:	There is already an adequate target FASTA index for Contaminants2Append(90429ace-4fb8-469c-abea-3054bc836b94).fasta.
2019-04-01 14:02:00	(2): Sequest HT:	There is already an adequate target FASTA index for Uniprot-proteome_ArabidopsisThaliana_UP000006548_2019(60738012-721e-4b54-8299-4d0bb955b3a9).fasta.
2019-04-01 14:02:00	(2): Sequest HT:	Start Sequest HT target search for 66620 spectra...
2019-04-01 14:02:00	(2): Sequest HT:	ISE (1.1.0.181, x64) started at 4/1/2019 2:02:22 PM on B2CORE (x64) [32 CPUs] running Microsoft Windows NT 6.2.9200.0 (64bit) [.NET: 4.0.30319.42000]
2019-04-01 14:02:00	(2): Sequest HT:	Workload level: #parallel tasks: 10
2019-04-01 14:02:00	(2): Sequest HT:	Workload level: #spectra loaded and processed at once: 10000
2019-04-01 14:02:00	(2): Sequest HT:	On-Disk search is performed
2019-04-01 14:05:00	(2): Sequest HT:	Average search time per spectrum was 2.4 ms.
2019-04-01 14:05:00	(2): Sequest HT:	Performing target search containing 66620 spectra took 2 min 41 s.
2019-04-01 14:05:00	(2): Sequest HT:	Stored 98266 PSMs for 66620 spectra
2019-04-01 14:05:00	(2): Sequest HT:	Discarded 269278 peptide(s) that did not match the conditions for protein terminal modifications.
2019-04-01 14:05:00	(2): Sequest HT:	Reading search results took 13.8 s.
2019-04-01 14:05:00	(2): Sequest HT:	Saving results took 9.3 s.
2019-04-01 14:05:00	(2): Sequest HT:	Saving proteins took 3.3 s.
2019-04-01 14:05:00	(2): Sequest HT:	Reading results took 28.5 s.
2019-04-01 14:05:00	(2): Sequest HT:	There is already an adequate decoy FASTA index for Contaminants2Append(90429ace-4fb8-469c-abea-3054bc836b94)_reversed.fasta.
2019-04-01 14:05:00	(2): Sequest HT:	There is already an adequate decoy FASTA index for Uniprot-proteome_ArabidopsisThaliana_UP000006548_2019(60738012-721e-4b54-8299-4d0bb955b3a9)_reversed.fasta.
2019-04-01 14:05:00	(2): Sequest HT:	Start Sequest HT decoy search for 66620 spectra...
2019-04-01 14:05:00	(2): Sequest HT:	ISE (1.1.0.181, x64) started at 4/1/2019 2:05:32 PM on B2CORE (x64) [32 CPUs] running Microsoft Windows NT 6.2.9200.0 (64bit) [.NET: 4.0.30319.42000]
2019-04-01 14:05:00	(2): Sequest HT:	Workload level: #parallel tasks: 10
2019-04-01 14:05:00	(2): Sequest HT:	Workload level: #spectra loaded and processed at once: 10000
2019-04-01 14:05:00	(2): Sequest HT:	On-Disk search is performed
2019-04-01 14:08:00	(2): Sequest HT:	Average search time per spectrum was 2.4 ms.
2019-04-01 14:08:00	(2): Sequest HT:	Performing decoy search containing 66620 spectra took 2 min 42 s.
2019-04-01 14:08:00	(2): Sequest HT:	Stored 206332 decoy PSMs for 66620 spectra
2019-04-01 14:08:00	(2): Sequest HT:	Discarded 287987 peptide(s) that did not match the conditions for protein terminal modifications.
2019-04-01 14:08:00	(2): Sequest HT:	Reading search results took 14.8 s.
2019-04-01 14:08:00	(2): Sequest HT:	Saving results took 10.1 s.
2019-04-01 14:08:00	(2): Sequest HT:	Saving proteins took 3 s.
2019-04-01 14:08:00	(2): Sequest HT:	Reading results took 28.2 s.
2019-04-01 14:08:00	(2): Sequest HT:	Finalizing search results...
2019-04-01 14:10:00	(2): Sequest HT:	-- Total search time was 6 min 28 s --
2019-04-01 14:14:00	(3): Percolator:	Creating input file for Sequest HT (2) took 4 min 10 s.
2019-04-01 14:14:00	(3): Percolator:	The input file contains 42938 PSMs, 23254 decoy PSMs and 32 features.
2019-04-01 14:14:00	(3): Percolator:	Generated percolator input for concatenated mode
2019-04-01 14:14:00	(3): Percolator:	Percolator version 3.02.1, Build Date Aug 14 2018 00:44:01
2019-04-01 14:14:00	(3): Percolator:	Copyright (c) 2006-9 University of Washington. All rights reserved.
2019-04-01 14:14:00	(3): Percolator:	Written by Lukas K├ñll (lukall@u.washington.edu) in the
2019-04-01 14:14:00	(3): Percolator:	Department of Genome Sciences at the University of Washington.
2019-04-01 14:14:00	(3): Percolator:	Issued command:
2019-04-01 14:14:00	(3): Percolator:	C:\Program Files\Thermo\Proteome Discoverer 2.3\Tools\Percolator\percolator.exe -s -X D:\PD_temp\Scratch\Job2864\Percol(3)\output.xml -Z -I auto -k D:\PD_temp\Scratch\Job2864\Percol(3)\input.xml
2019-04-01 14:14:00	(3): Percolator:	Started Mon Apr 1 14:14:45 2019
2019-04-01 14:14:00	(3): Percolator:	Hyperparameters: selectionFdr=0.01, Cpos=0, Cneg=0, maxNiter=10
2019-04-01 14:14:00	(3): Percolator:	Reading pin-xml input from datafile D:\PD_temp\Scratch\Job2864\Percol(3)\input.xml
2019-04-01 14:14:00	(3): Percolator:	enzyme=Trypsin
2019-04-01 14:14:00	(3): Percolator:	Features:
2019-04-01 14:14:00	(3): Percolator:	XCorr Delta Cn From Second PSM Binomial Score Isolation Interference [%] MH+ [Da] Delta Mass [Da] Delta Mass [ppm] Absolute Delta Mass [Da] Absolute Delta Mass [ppm] Peptide Length Is z=1 Is z=2 Is z=3 Is z=4 Is z=5 Is z>5 # Missed Cleavages Log Peptides Matched Log Total Intensity Fraction Matched Intensity [%] Fragment Coverage Series A, B, C [%] Fragment Coverage Series X, Y, Z [%] Log Matched…
2019-04-01 14:14:00	(3): Percolator:	Concatenated search input detected, skipping both target-decoy competition and mix-max.
2019-04-01 14:14:00	(3): Percolator:	Train/test set contains 42938 positives and 23254 negatives, size ratio=1.84648 and pi0=1
2019-04-01 14:14:00	(3): Percolator:	Selecting Cpos by cross-validation.
2019-04-01 14:14:00	(3): Percolator:	Selecting Cneg by cross-validation.
2019-04-01 14:14:00	(3): Percolator:	Split 1:	Selected feature 3 as initial direction. Could separate 10866 training set positives with q<0.01 in that direction.
2019-04-01 14:14:00	(3): Percolator:	Split 2:	Selected feature 3 as initial direction. Could separate 10661 training set positives with q<0.01 in that direction.
2019-04-01 14:14:00	(3): Percolator:	Split 3:	Selected feature 3 as initial direction. Could separate 10665 training set positives with q<0.01 in that direction.
2019-04-01 14:14:00	(3): Percolator:	Found 16004 test set positives with q<0.01 in initial direction
2019-04-01 14:14:00	(3): Percolator:	Reading in data and feature calculation took 13.556 cpu seconds or 14 seconds wall clock time.
2019-04-01 14:14:00	(3): Percolator:	---Training with Cpos selected by cross validation, Cneg selected by cross validation, initial_fdr=0.01, fdr=0.01
2019-04-01 14:15:00	(3): Percolator:	Iteration 1:	Estimated 18243 PSMs with q<0.01
2019-04-01 14:15:00	(3): Percolator:	Iteration 2:	Estimated 18707 PSMs with q<0.01
2019-04-01 14:15:00	(3): Percolator:	Iteration 3:	Estimated 18784 PSMs with q<0.01
2019-04-01 14:15:00	(3): Percolator:	Iteration 4:	Estimated 18830 PSMs with q<0.01
2019-04-01 14:15:00	(3): Percolator:	Iteration 5:	Estimated 18847 PSMs with q<0.01
2019-04-01 14:15:00	(3): Percolator:	Iteration 6:	Estimated 18855 PSMs with q<0.01
2019-04-01 14:15:00	(3): Percolator:	Iteration 7:	Estimated 18866 PSMs with q<0.01
2019-04-01 14:15:00	(3): Percolator:	Iteration 8:	Estimated 18861 PSMs with q<0.01
2019-04-01 14:15:00	(3): Percolator:	Iteration 9:	Estimated 18861 PSMs with q<0.01
2019-04-01 14:15:00	(3): Percolator:	Iteration 10:	Estimated 18862 PSMs with q<0.01
2019-04-01 14:15:00	(3): Percolator:	Learned normalized SVM weights for the 3 cross-validation splits:
2019-04-01 14:15:00	(3): Percolator:	Split1	Split2	Split3	FeatureName
2019-04-01 14:15:00	(3): Percolator:	0.3896	0.4816	0.4372	XCorr
2019-04-01 14:15:00	(3): Percolator:	0.1332	0.1655	0.1485	Delta Cn From Second PSM
2019-04-01 14:15:00	(3): Percolator:	1.417	1.6463	1.5466	Binomial Score
2019-04-01 14:15:00	(3): Percolator:	0.0054	-0.0018	0.0067	Isolation Interference [%]
2019-04-01 14:15:00	(3): Percolator:	-0.5409	-0.4013	-0.243	MH+ [Da]
2019-04-01 14:15:00	(3): Percolator:	-0.3181	-0.4932	-0.0222	Delta Mass [Da]
2019-04-01 14:15:00	(3): Percolator:	0.6648	0.9769	0.6053	Delta Mass [ppm]
2019-04-01 14:15:00	(3): Percolator:	0.7623	1.0987	0.4883	Absolute Delta Mass [Da]
2019-04-01 14:15:00	(3): Percolator:	-1.1306	-1.582	-1.0488	Absolute Delta Mass [ppm]
2019-04-01 14:15:00	(3): Percolator:	0.3945	0.275	0.2965	Peptide Length
2019-04-01 14:15:00	(3): Percolator:	0	0	0	Is z=1
2019-04-01 14:15:00	(3): Percolator:	-0.0566	-0.038	-0.068	Is z=2
2019-04-01 14:15:00	(3): Percolator:	0.0566	0.038	0.068	Is z=3
2019-04-01 14:15:00	(3): Percolator:	0	0	0	Is z=4
2019-04-01 14:15:00	(3): Percolator:	0	0	0	Is z=5
2019-04-01 14:15:00	(3): Percolator:	0	0	0	Is z>5
2019-04-01 14:15:00	(3): Percolator:	-0.3435	-0.4337	-0.4301	# Missed Cleavages
2019-04-01 14:15:00	(3): Percolator:	0.0304	-0.0555	-0.0406	Log Peptides Matched
2019-04-01 14:15:00	(3): Percolator:	-0.4844	-0.7055	-0.6322	Log Total Intensity
2019-04-01 14:15:00	(3): Percolator:	0.2605	0.262	0.3175	Fraction Matched Intensity [%]
2019-04-01 14:15:00	(3): Percolator:	-0.0264	-0.0931	-0.1413	Fragment Coverage Series A, B, C [%]
2019-04-01 14:15:00	(3): Percolator:	-0.0001	0.1871	0.2649	Fragment Coverage Series X, Y, Z [%]
2019-04-01 14:15:00	(3): Percolator:	-0.736	-0.6311	-0.6413	Log Matched Fragment Series Intensities A, B, C
2019-04-01 14:15:00	(3): Percolator:	0.9227	1.1139	0.9451	Log Matched Fragment Series Intensities X, Y, Z
2019-04-01 14:15:00	(3): Percolator:	0.0881	0.1774	0.2846	Longest Sequence Series A, B, C
2019-04-01 14:15:00	(3): Percolator:	0.5485	0.447	0.4252	Longest Sequence Series X, Y, Z
2019-04-01 14:15:00	(3): Percolator:	-0.2785	-0.3002	-0.3308	IQR Fragment Delta Mass [Da]
2019-04-01 14:15:00	(3): Percolator:	-0.0627	-0.1362	-0.0727	IQR Fragment Delta Mass [ppm]
2019-04-01 14:15:00	(3): Percolator:	-0.3043	-0.4322	-0.521	Mean Fragment Delta Mass [Da]
2019-04-01 14:15:00	(3): Percolator:	0.01	0.041	0.1054	Mean Fragment Delta Mass [ppm]
2019-04-01 14:15:00	(3): Percolator:	0.0539	0.0164	-0.0181	Mean Absolute Fragment Delta Mass [Da]
2019-04-01 14:15:00	(3): Percolator:	-0.138	-0.1374	-0.1665	Mean Absolute Fragment Delta Mass [ppm]
2019-04-01 14:15:00	(3): Percolator:	-1.3241	-1.4427	-1.421	m0
2019-04-01 14:15:00	(3): Percolator:	Found 18743 test set PSMs with q<0.01.
2019-04-01 14:15:00	(3): Percolator:	Tossing out "redundant" PSMs keeping only the best scoring PSM for each unique peptide.
2019-04-01 14:15:00	(3): Percolator:	Calculating q values.
2019-04-01 14:15:00	(3): Percolator:	Final list yields 2704 target peptides with q<0.01.
2019-04-01 14:15:00	(3): Percolator:	Calculating posterior error probabilities (PEPs).
2019-04-01 14:15:00	(3): Percolator:	PSMId	score	q-value	posterior_error_prob	peptide	proteinIds
2019-04-01 14:15:00	(3): Percolator:	Processing took 28.92 cpu seconds or 29 seconds wall clock time.
2019-04-01 14:15:00	(3): Percolator:	18743/186 high confident target/decoy peptides were found for Sequest HT (2).
2019-04-01 14:15:00	(3): Percolator:	1660/833 medium confident target/decoy peptides were found for Sequest HT (2).
2019-04-01 14:15:00	(3): Percolator:	-- Total execution of Percolator (64Bit) for Sequest HT (2) took 5 min 1 s --
2019-04-01 14:15:00	(4): Minora Feature Detector:	Start detecting lcmspeaks...
2019-04-01 14:15:00	(4): Minora Feature Detector:	Running 2 jobs with 2 jobs in parallel.
2019-04-01 14:15:00	(4): Minora Feature Detector:	Start F3 with 'FTMS + p NSI Full ms [395.00-1600.00]'
2019-04-01 14:15:00	(4): Minora Feature Detector:	Start F4 with 'FTMS + p NSI Full ms [395.00-1600.00]'
2019-04-01 14:17:00	(4): Minora Feature Detector:	Detecting LcmsPeaks took 1 min 31 s
2019-04-01 14:17:00	(4): Minora Feature Detector:	Start processing F4: '190328ALLSAM05193_10mc933Dig2-CT3.raw'.
2019-04-01 14:17:00	(4): Minora Feature Detector:	Start processing F3: '190328ALLSAM05192_9WTcol0Dig2-CT3.raw'.
2019-04-01 14:17:00	(4): Minora Feature Detector:	Importing peaks for F4 (scan filter: FTMS + p NSI Full ms [395.00-1600.00])...
2019-04-01 14:17:00	(4): Minora Feature Detector:	Importing peaks for F3 (scan filter: FTMS + p NSI Full ms [395.00-1600.00])...
2019-04-01 14:17:00	(4): Minora Feature Detector:	F4: Found 124067 chromatographic peaks.
2019-04-01 14:17:00	(4): Minora Feature Detector:	F3: Found 123262 chromatographic peaks.
2019-04-01 14:17:00	(4): Minora Feature Detector:	F4: Importing auto traces...
2019-04-01 14:17:00	(4): Minora Feature Detector:	F4: Imported 94180 auto traces.
2019-04-01 14:17:00	(4): Minora Feature Detector:	F3: Importing auto traces...
2019-04-01 14:17:00	(4): Minora Feature Detector:	F3: Imported 96913 auto traces.
2019-04-01 14:17:00	(4): Minora Feature Detector:	Importing peak to spectrum links...
2019-04-01 14:17:00	(4): Minora Feature Detector:	F4: Standard deviations: m/z 2.60; RT 0.11; Intensity 39.48; Fraction Missing Intensity 0.18; Shoulder Score 0.000; Peak Length Score 0.341070257507488 took 14.6 s
2019-04-01 14:17:00	(4): Minora Feature Detector:	F3: Standard deviations: m/z 2.55; RT 0.11; Intensity 40.38; Fraction Missing Intensity 0.22; Shoulder Score 0.000; Peak Length Score 0.329466897054034 took 15 s
2019-04-01 14:17:00	(4): Minora Feature Detector:	Found 6212 features (F4: 3362, F3: 2850)
2019-04-01 14:17:00	(4): Minora Feature Detector:	Writing data took 1 s.
2019-04-01 14:17:00	(4): Minora Feature Detector:	Creating features for PSMs took 6.6 s.
2019-04-01 14:18:00	(4): Minora Feature Detector:	F4: Unidentified feature detection took 16.3 s
2019-04-01 14:18:00	(4): Minora Feature Detector:	F3: Unidentified feature detection took 17.4 s
2019-04-01 14:18:00	(4): Minora Feature Detector:	Found 39278 unidentified features (F4 : 20210, F3 : 19068).
2019-04-01 14:18:00	(4): Minora Feature Detector:	-- Total execution of Minora Feature Detector (4) took 2 min 28 s --
2019-04-01 14:18:00	Job Execution:	Finished E:\Proteomics\Data\Tornkvist Anna\190319ALLSAM05192_9WTcol0-CT_Arabidop_Tornkvist\190328ALLSAM05193_10mc933Dig2-CT3_LFQ_10over9_Tornkvist.msf
2019-04-01 14:18:00	Job Execution:	----- Total Job execution took: 22 min 16 s. -----

## Sheet: Explanation
Thermo Proteome Discoverer Protein Identification Report:
This is a brief explanation of the current PD (Proteome Discoverer 1.4) Excel report we generate and present for users. Users upload their final report from the LIMS system on which they registered, submitted and tracked their sample submission. This guide will hopefully answer all your questions regarding your report. If you have further questions please call us at 617-495-4043 or email at prote…
Upon opening your report you will find 4 tabs:
1. Cover Page – sample information
2. Proteins Page – report data
3. Search Summary Page – instrument parameters (this is additional information, not					necessary to your results but available for interested users)
4. Explanation Page – this explanation page
Proteins page
This page lists the proteins identified in your sample. There is a “+” sign to the far left of each protein listed. Click on the “+” sign to open the protein and see a list of peptides from that protein that were sequenced and substantiate the proteins identification.
When you open your Excel file, you will see a list of proteins each of which has the following parameters:
Accession
UniprotKB protein accession number, the unique identifier assigned to the protein by the FASTA database used to generate the report. To find the NCBInr equivalent, copy the accession number and paste it into NCBInr search, selecting ‘protein’ from the drop-down list
Description
UniprotKB protein description. Provides the name of the protein exclusive of the identifier that appears in the Accession column.
Score
The protein score, which is the sum of the scores of the individual peptides. I use SEQUEST search algorithm, for which the score is the sum of all peptide Xcorr values above the specified score threshold. The score threshold is calculated as follows: 0.8 + peptide_charge × peptide_relevance_factor where peptide_relevance_factor is a parameter with a default value of 0.4. For each spectrum and se…
Coverage
The percent coverage calculated by dividing the number of amino acids in all found peptides by the total number of amino acids in the entire protein sequence. (The higher the better)
# Proteins
The number of identified proteins in the protein group of a master protein. Proteins are grouped based on sequence homology and/or isoforms as explained below.
# Unique peptides
The number of peptide sequences unique to a protein group.
# Peptides
The number of distinct peptide sequences in the protein group.
# PSMs
The total number of identified peptide sequences (peptide spectrum matches) for the protein, including those redundantly identified. (The higher the better)
# AAs, MW [kDa], calc. pI
The calculated parameters of the protein based on the amino acid sequence in the FASTA database used to generate the report. The Proteome Discoverer application calculates the molecular weight without considering post-translational modifications. If you have separated proteins by molecular weight by PAGE, you can use the protein’s molecular weight as a rough constraint to estimate whether it is r…
Peptides page
Next, expand the sheet by clicking on [+] which opens the column parameters for the associated peptides.
A2 or other Letter/number, first column
A top level confidence achieved with the peptide sequence: high confidence, medium confidence, or low confidence. I send you only the high-confidence data, unless instructed otherwise.
Sequence
The sequence of amino acids that compose the peptide.
# PSMs
The total number of identified peptide sequences (PSMs) for the protein, including those redundantly identified. (The higher the better)
# Proteins
Displays the number of proteins in which this peptide is found
# Protein Groups
The number of protein groups in which this peptide is found.
MS/MS-based proteomics studies are based on peptides. However, deducing protein identities from a set of identified peptides could be difficult because of sequence redundancy, such as the presence of proteins that have shared peptides. These redundant proteins are automatically grouped and are not initially displayed in the search results report.
The proteins within a group are ranked according to the number of peptide sequences, the number of PSMs, their protein scores, and the sequence coverage. The top-ranking protein of a group becomes the master protein of that group. By default, only the master proteins are displayed on the Proteins page.
A protein group consists of the following:
· One master protein that is identified by a set of peptides that are not included (all together) in any other protein group.
· All proteins that are identified by the same set or a subset of those peptides.
The # Proteins column on the Proteins and Peptides pages of the results report displays the number of identified proteins in the protein group of a master protein. You may have to expand the columns to see all.
Protein Group Accessions
The unique identifiers (accessions) of all master proteins from all protein groups that include this peptide sequence. Since I normally group proteins by selecting the “Consider Leucine and Isoleucine as Equal” option, this column also lists identifiers from master proteins that may include this specific peptide sequence. The identifiers displayed in the Protein Group Accessions column are the sa…
Modifications
The static and dynamic modifications identified in the peptide. I always use iodoacetamide for Cys alkylation, and this static modification will be in your search results as ‘Carbamidomethyl’ unless you modified your Cys residues with a different reagent. Met oxidation and Asn and Gln deamidation are common dynamic modifications.
delta Cn
The normalized score difference between the currently selected PSM and the highest-scoring PSM for that spectrum. (The lower the better)
Xcorr
A search-dependent score. It scores the number of fragment ions that are common to two different peptides with the same precursor mass and calculates the cross-correlation score for all candidate peptides queried from the database by SEQUEST searches. (Jimmy K. Eng, Ashley L. McCormack, and John R. Yates, III; An Approach to Correlate Tandem Mass Spectral Data of Peptides with Amino Acid Sequence…
Probability
The probability score for the peptide. This score is an assessment of the probability that the reported match is a random occurrence. A lower probability score indicates a better match. (The lower the better)
Charge
The charge state of the peptide, z (z is always greater than 1 as set during the MS analysis).
MH+ [Da]
Calculated m/z of the peptide with z = 1. It should be “MH+ [m/z]”, not [Da].
delta M [ppm]
Mass measurement error in parts per million, ppm (The lower the better)
RT [min]
The peptide’s retention time during chromatographic separation.
# Missed Cleavages
The number of cleavage sites in a peptide sequence that a cleavage reagent (enzyme) did not cleave. This number excludes cases where an amino acid (e.g. Pro) inhibits the cleaving enzyme (e.g. trypsin).

## Sheet: Protein Arabi Seed 5193 5192
Proteomics of WT and mcaII seeds (Liu et al ). Proteins with abundant ratio ≥ 2 were considered enriched.
Accession	Description	Exp. q-value: Combined	Contaminant	Sum PEP Score	Coverage [%]	# Peptides	# PSMs	# Unique Peptides	# AAs	MW [kDa]	calc. pI	Score Sequest HT: Sequest HT	# Peptides (by Search Engine): Sequest HT	# Razor Peptides	Abundance Ratio: (F4) / (F3)	Abundance Ratio Adj. P-Value: (F4) / (F3)	Abundance Ratio Variability [%]: (F4) / (F3)	Abundances (Grouped): F4	Abundances (Grouped): F3	Found in Sample: [S4] F4: Sample	Found in Sample: [S3] F3: Sample	# Protein Groups	Modifications	log2FC	LOG10
Annotated Sequence	Modifications	Contaminant	Qvality PEP	Qvality q-value	# Protein Groups	# Proteins	# PSMs	Master Protein Accessions	Positions in Master Proteins	Modifications in Master Proteins	# Missed Cleavages	Theo. MH+ [Da]	# Razor Quan Results	Abundance Ratio: (F4) / (F3)	Abundance Ratio Adj. P-Value: (F4) / (F3)	Abundance Ratio Variability [%]: (F4) / (F3)	Abundances (Grouped): F4	Abundances (Grouped): F3	Quan Info	Found in Sample: [S4] F4: Sample	Found in Sample: [S3] F3: Sample	Confidence (by Search Engine): Sequest HT	Percolator q-Value (by Search Engine): Sequest HT	Percolator PEP (by Search Engine): Sequest HT	XCorr (by Search Engine): Sequest HT	Top Apex RT [min]	Sequence in Protein	Positions in Proteins	Quan Usage	Quan Ratio Usage
[K].KAVSIQGQETEVPPR.[E]	1xDeamidated [Q8]	FALSE	0.108968	0.00791917	1	1	1	F4HR11	F4HR11 [881-895]		1	1639.86	0	0.68	0.13015	0	11713.3	17229.5		Peak Found	High	High	0.002084	0.02442	2.41	66.21	K.KAVSIQGQETEVPPR.E	[881-895]	Used	Used
Q96318	12S seed storage protein CRC OS=Arabidopsis thaliana OX=3702 GN=CRC PE=1 SV=1	0	FALSE	541.214	78	35	1682	35	524	58.2	6.99	6438.99	35	0	0.658	0.0370319	27.04	2.09786e+08	2.80826e+08	High	High	1
Annotated Sequence	Modifications	Contaminant	Qvality PEP	Qvality q-value	# Protein Groups	# Proteins	# PSMs	Master Protein Accessions	Positions in Master Proteins	Modifications in Master Proteins	# Missed Cleavages	Theo. MH+ [Da]	# Razor Quan Results	Abundance Ratio: (F4) / (F3)	Abundance Ratio Adj. P-Value: (F4) / (F3)	Abundance Ratio Variability [%]: (F4) / (F3)	Abundances (Grouped): F4	Abundances (Grouped): F3	Quan Info	Found in Sample: [S4] F4: Sample	Found in Sample: [S3] F3: Sample	Confidence (by Search Engine): Sequest HT	Percolator q-Value (by Search Engine): Sequest HT	Percolator PEP (by Search Engine): Sequest HT	XCorr (by Search Engine): Sequest HT	Top Apex RT [min]	Sequence in Protein	Positions in Proteins	Quan Usage	Quan Ratio Usage
[K].NTPQGSMLVGEISYGK.[L]		FALSE	0.000795423	0.000572698	1	1	4	F4JVN6	F4JVN6 [1080-1095]		0	1680.83	0	1.327	0.786397	0	43223.9	32574.8		High	High	High	0.0001305	0.0001555	3.1	115.43	K.NTPQGSMLVGEISYGK.L	[1080-1095]	Used	Used
[K].LTTGQGLMQVDK.[A]		FALSE	0.000407425	0.000572698	1	1	2	F4JVN6	F4JVN6 [606-617]		0	1290.67	0	6.717	0.398895	0	23548.8	3505.68		High	Peak Found	High	0.0001305	7.878e-05	3.68	86.62	K.LTTGQGLMQVDK.A	[606-617]	Used	Used
[K].ILEGLLSR.[S]		FALSE	0.000963627	0.000572698	1	1	5	F4JVN6	F4JVN6 [1191-1198]		0	900.551	0	1.231	0.696954	0	34610.3	28121.9		High	High	High	0.0001305	0.0001891	2.54	115.92	K.ILEGLLSR.S	[1191-1198]	Used	Used
[R].LNLHSEPDGPFTGNGAFK.[S]	1xDeamidated [N14]	FALSE	1.22745e-05	0.000572698	1	1	1	F4JVN6	F4JVN6 [1038-1055]		0	1901.9	0	1.927	0.959731	0	71275.9	36994.3		Peak Found	High	High	0.0001305	2.244e-06	4.05	114.09	R.LNLHSEPDGPFTGNGAFK.S	[1038-1055]	Used	Used
[R].RPIKWESAPTFASPSAK.[S]		FALSE	0.000686333	0.000572698	1	1	4	F4JVN6	F4JVN6 [818-834]		1	1873	0	0.01	5.76991e-17			31699.9		Not Found	High	High	0.0001305	0.0001334	4.04	93.23	R.RPIKWESAPTFASPSAK.S	[818-834]	Used	Used
[R].VPDYLLLTNNGR.[G]	1xDeamidated [N10]	FALSE	6.61595e-05	0.000572698	1	1	8	F4JVN6	F4JVN6 [701-712]		0	1375.72	0	1.623	0.874632	0	35440.6	21830.8		High	High	High	0.0001305	1.243e-05	3.73	125.59	R.VPDYLLLTNNGR.G	[701-712]	Used	Used
[R].ALENTSTPVGDLPEDK.[L]		FALSE	5.57632e-05	0.000572698	1	1	1	F4JVN6	F4JVN6 [590-605]		0	1685.82	0	5.828	0.437668	0	32677.8	5607.23		High	Peak Found	High	0.0001305	1.043e-05	4.75	90.9	R.ALENTSTPVGDLPEDK.L	[590-605]	Used	Used
[R].ALENTSTPVGDLPEDKLTTGQGLMQVDK.[A]		FALSE	0.000606866	0.000572698	1	1	4	F4JVN6	F4JVN6 [590-617]		1	2957.48	0	2.304	0.992651	0	34249.8	14866.5		High	High	High	0.0001305	0.0001179	2.8	126.38	R.ALENTSTPVGDLPEDKLTTGQGLMQVDK.A	[590-617]	Used	Used
[R].VALDTQSLEEDPDSGKLADFSPLTNYR.[I]		FALSE	5.54613e-06	0.000572698	1	1	3	F4JVN6	F4JVN6 [310-336]		1	2981.44	0	0.01	5.76991e-17			45879.2		Not Found	High	High	0.0001305	1e-06	3.1	142.93	R.VALDTQSLEEDPDSGKLADFSPLTNYR.I	[310-336]	Used	Used
[K].VLDDLIQNENETANK.[K]		FALSE	4.78299e-05	0.000572698	1	1	1	F4JVN6	F4JVN6 [1329-1343]		0	1715.84	0						No Quan Values	High	Not Found	High	0.0001305	8.92e-06	3.5		K.VLDDLIQNENETANK.K	[1329-1343]	Not Used	Not Used
[K].YGTLTVLR.[E]		FALSE	0.00182425	0.000987479	1	1	7	F4JVN6	F4JVN6 [1309-1316]		0	922.536	0	1.908	0.935609	0	40523.7	21239.8		High	High	High	0.0001991	0.0003635	2.08	95.44	K.YGTLTVLR.E	[1309-1316]	Used	Used
[R].SVDVDELAR.[F]		FALSE	0.00263763	0.000987479	1	1	9	F4JVN6	F4JVN6 [1221-1229]		0	1003.51	0	1.466	0.83179	0	39562.2	26989.1		High	High	High	0.0001991	0.0005336	2.6	79.04	R.SVDVDELAR.F	[1221-1229]	Used	Used
[R].LGSMETGTGLTR.[A]	1xOxidation [M4]	FALSE	0.00168476	0.000987479	1	1	2	F4JVN6	F4JVN6 [409-420]		0	1238.6	0	1.233	0.616262	0	16987.6	13782.3		High	High	High	0.0001991	0.0003353	3.22	57.41	R.LGSMETGTGLTR.A	[409-420]	Used	Used
[R].VPYQPIDAQLK.[T]		FALSE	0.00145335	0.000987479	1	1	1	F4JVN6	F4JVN6 [915-925]		0	1271.7	0	8.433	0.189912	0	102503	12154.4		High	Peak Found	High	0.0001991	0.000287	3.28	95.59	R.VPYQPIDAQLK.T	[915-925]	Used	Used
[R].DQLADALYQK.[G]		FALSE	0.00140182	0.000987479	1	1	3	F4JVN6	F4JVN6 [1254-1263]		0	1164.59	0	2.912	0.934141	0	81513	27995.9		Peak Found	High	High	0.0001991	0.0002773	3.49	94.93	R.DQLADALYQK.G	[1254-1263]	Used	Used
[K].LADFSPLTNYR.[I]		FALSE	0.00197499	0.000987479	1	1	1	F4JVN6	F4JVN6 [326-336]		0	1296.66	0	5.019	0.593658	0	36346.7	7242.28		High	Peak Found	High	0.0001991	0.0003945	2.85	120.67	K.LADFSPLTNYR.I	[326-336]	Used	Used
[R].YIEVPHGATWAEATMR.[T]		FALSE	0.00310298	0.00143413	1	1	3	F4JVN6	F4JVN6 [781-796]		0	1831.88	0	1.013	0.403678	0	23840.5	23531.9		Peak Found	High	High	0.0002813	0.0006321	2.59	117.79	R.YIEVPHGATWAEATMR.T	[781-796]	Used	Used
[R].FLLDKTEPEDDEAEKLK.[K]		FALSE	0.00310298	0.00143413	1	1	1	F4JVN6	F4JVN6 [1230-1246]		2	2020.01	0						No Quan Values	Not Found	High	High	0.0002813	0.0006336	4.09		R.FLLDKTEPEDDEAEKLK.K	[1230-1246]	Not Used	Not Used
[K].AVNNLYDFDQK.[H]		FALSE	0.00511822	0.00166669	1	1	5	F4JVN6	F4JVN6 [250-260]		0	1326.63	0	21.23	0.015568	0	668800	31503		High	High	High	0.0003407	0.001069	3.17	98.52	K.AVNNLYDFDQK.H	[250-260]	Used	Used
[K].AEGIPVSPYSVR.[R]		FALSE	0.0129152	0.00190722	1	1	3	F4JVN6	F4JVN6 [577-588]		0	1274.67	0	1.055	0.676638	0	60777.7	57604.6		High	High	High	0.0004264	0.002784	2.77	98.87	K.AEGIPVSPYSVR.R	[577-588]	Used	Used
[R].IPVTIIIPK.[T]		FALSE	0.0117234	0.00190722	1	1	2	F4JVN6	F4JVN6 [748-756]		0	993.671	0	3.195	0.918473	0	53540.6	16758.5		High	High	High	0.0004264	0.002524	0.78	126.87	R.IPVTIIIPK.T	[748-756]	Used	Used
[K].SEYPDYTPLLAK.[I]		FALSE	0.0378867	0.00486181	1	1	1	F4JVN6	F4JVN6 [1179-1190]		0	1396.7	0	0.811	0.209551	0	19958.9	24622		Peak Found	High	High	0.001076	0.008619	1.46	118.27	K.SEYPDYTPLLAK.I	[1179-1190]	Used	Used
[K].SSVLMPGVK.[E]		FALSE	0.0553304	0.00545717	1	1	1	F4JVN6	F4JVN6 [1056-1064]		0	917.512	0	1.832	0.930419	0	46255.8	25251.7		Peak Found	High	High	0.001308	0.01261	2.56	82.19	K.SSVLMPGVK.E	[1056-1064]	Used	Used
[K].DNPVSYPISYVVPPNKPEEDKK.[A]		FALSE	0.0601735	0.00545717	1	1	3	F4JVN6	F4JVN6 [1108-1129]		1	2515.27	0	3.826	0.830163	0	75992.4	19860.1		High	Peak Found	High	0.00142	0.0137	2.7	112.77	K.DNPVSYPISYVVPPNKPEEDKK.A	[1108-1129]	Used	Used
[R].HENVELLEK.[L]		FALSE	0.124617	0.00819423	1	1	2	F4JVN6	F4JVN6 [1013-1021]		0	1110.58	0	1.83	0.96464	0	83579.2	45667.5		High	High	High	0.002186	0.02774	2.24	65.44	R.HENVELLEK.L	[1013-1021]	Used	Used
Q9LF88	Late embryogenesis abundant protein At3g53040 OS=Arabidopsis thaliana OX=3702 GN=At3g53040 PE=2 SV=1	0	FALSE	171.013	63	34	216	33	479	52.1	5.39	641.87	34	1	3.187	0.893131	88.9	5.44134e+06	2.3257e+06	High	High	1		1.6722	-0.503382
Annotated Sequence	Modifications	Contaminant	Qvality PEP	Qvality q-value	# Protein Groups	# Proteins	# PSMs	Master Protein Accessions	Positions in Master Proteins	Modifications in Master Proteins	# Missed Cleavages	Theo. MH+ [Da]	# Razor Quan Results	Abundance Ratio: (F4) / (F3)	Abundance Ratio Adj. P-Value: (F4) / (F3)	Abundance Ratio Variability [%]: (F4) / (F3)	Abundances (Grouped): F4	Abundances (Grouped): F3	Quan Info	Found in Sample: [S4] F4: Sample	Found in Sample: [S3] F3: Sample	Confidence (by Search Engine): Sequest HT	Percolator q-Value (by Search Engine): Sequest HT	Percolator PEP (by Search Engine): Sequest HT	XCorr (by Search Engine): Sequest HT	Top Apex RT [min]	Sequence in Protein	Positions in Proteins	Quan Usage	Quan Ratio Usage
[K].MAGAAMNLAK.[R]		FALSE	0.000409184	0.000572698	1	1	2	Q941R6	Q941R6 [5-14]		0	977.491	0	0.959	0.876061	0	125156	130442		High	High	High	0.0001305	7.884e-05	3.07	70.59	K.MAGAAMNLAK.R	[5-14]	Used	Used
[R].IEAVEPEKNLITFR.[V]		FALSE	0.00215502	0.000987479	1	2	2	Q941R6	Q941R6 [90-103]		1	1658.91	0	0.109	4.3736e-07	0	4458.95	40824		Peak Found	High	High	0.0001991	0.0004318	2.45	116.39	R.IEAVEPEKNLITFR.V	[90-103]	Used	Used
[R].VIEGDLLKEYK.[S]		FALSE	0.00368311	0.00166669	1	1	1	Q941R6	Q941R6 [104-114]		1	1306.73	0						No Quan Values	Not Found	High	High	0.0003407	0.0007588	1.92		R.VIEGDLLKEYK.S	[104-114]	Not Used	Not Used
[K].VGSIVFWNYVHDGEAK.[V]		FALSE	0.00587374	0.00166669	1	1	1	Q941R6	Q941R6 [69-84]		0	1820.9	0	0.414	0.0471685	0	21457	51837.4		Peak Found	High	High	0.0003948	0.001231	1.64	136.27	K.VGSIVFWNYVHDGEAK.V	[69-84]	Used	Used
P15455	12S seed storage protein CRA1 OS=Arabidopsis thaliana OX=3702 GN=CRA1 PE=1 SV=2	0	FALSE	290.594	71	29	671	27	472	52.6	7.8	2094.31	29	2	0.426	0.00165462	12.15	5.76822e+07	1.2129e+08	High	High	1		-1.23107	0.37059
Annotated Sequence	Modifications	Contaminant	Qvality PEP	Qvality q-value	# Protein Groups	# Proteins	# PSMs	Master Protein Accessions	Positions in Master Proteins	Modifications in Master Proteins	# Missed Cleavages	Theo. MH+ [Da]	# Razor Quan Results	Abundance Ratio: (F4) / (F3)	Abundance Ratio Adj. P-Value: (F4) / (F3)	Abundance Ratio Variability [%]: (F4) / (F3)	Abundances (Grouped): F4	Abundances (Grouped): F3	Quan Info	Found in Sample: [S4] F4: Sample	Found in Sample: [S3] F3: Sample	Confidence (by Search Engine): Sequest HT	Percolator q-Value (by Search Engine): Sequest HT	Percolator PEP (by Search Engine): Sequest HT	XCorr (by Search Engine): Sequest HT	Top Apex RT [min]	Sequence in Protein	Positions in Proteins	Quan Usage	Quan Ratio Usage
[R].GLFIIDKEGVIQHSTINNLGIGR.[S]		FALSE	0.000169488	0.000572698	2	2	1	Q96291; Q9C5R8	Q96291 [196-218]; Q9C5R8 [203-225]		1	2494.38	0	0.01	5.76991e-17			9436.26	Shared	Not Found	High	High	0.0001305	3.221e-05	2.73	140.81	R.GLFIIDKEGVIQHSTINNLGIGR.S	[203-225]	Not Used	Not Used
[K].SFGVLIPDQGIALR.[G]		FALSE	0.00303	0.00143413	1	1	2	Q9C5R8	Q9C5R8 [189-202]		0	1485.84	0	1.58	0.834087	0	25188.7	15940.6		High	Peak Found	High	0.0002813	0.0006181	2.75	149.06	K.SFGVLIPDQGIALR.G	[189-202]	Used	Used
[R].KSGGLGDLNYPLVSDITK.[S]		FALSE	0.0319256	0.00462251	1	1	1	Q9C5R8	Q9C5R8 [167-184]		1	1877	0						No Quan Values	High	Peak Found	High	0.0009067	0.00723	2.78	135.01	R.KSGGLGDLNYPLVSDITK.S	[167-184]	Not Used	Not Used
Q9LUJ7	Vicilin-like seed storage protein At3g22640 OS=Arabidopsis thaliana OX=3702 GN=PAP85 PE=2 SV=1	0	FALSE	189.667	57	28	366	28	486	55	7.14	1074.37	28	0	1.586	0.76587	76.91	3.16862e+07	2.09109e+07	High	High	1		0.665393	-0.200303
Annotated Sequence	Modifications	Contaminant	Qvality PEP	Qvality q-value	# Protein Groups	# Proteins	# PSMs	Master Protein Accessions	Positions in Master Proteins	Modifications in Master Proteins	# Missed Cleavages	Theo. MH+ [Da]	# Razor Quan Results	Abundance Ratio: (F4) / (F3)	Abundance Ratio Adj. P-Value: (F4) / (F3)	Abundance Ratio Variability [%]: (F4) / (F3)	Abundances (Grouped): F4	Abundances (Grouped): F3	Quan Info	Found in Sample: [S4] F4: Sample	Found in Sample: [S3] F3: Sample	Confidence (by Search Engine): Sequest HT	Percolator q-Value (by Search Engine): Sequest HT	Percolator PEP (by Search Engine): Sequest HT	XCorr (by Search Engine): Sequest HT	Top Apex RT [min]	Sequence in Protein	Positions in Proteins	Quan Usage	Quan Ratio Usage
[R].LGDSGDADVVVLK.[N]		FALSE	6.82206e-05	0.000572698	1	1	3	O65390	O65390 [63-75]		0	1287.68	0	4.905	0.604864	0	111677	22770		High	High	High	0.0001305	1.28e-05	3.38	96.32	R.LGDSGDADVVVLK.N	[63-75]	Used	Used
[K].NYLDAQYYGEIAIGTPPQK.[F]		FALSE	2.12089e-06	0.000572698	2	2	7	O65390; Q8VYL3	O65390 [76-94]; Q8VYL3 [83-101]		0	2141.05	0	0.01	5.76991e-17			12234.3	Shared	High	High	High	0.0001305	3.769e-07	4.32	134.98	K.NYLDAQYYGEIAIGTPPQK.F	[76-94]	Used	Used
[R].NADEEEGGELVFGGVDPNHFK.[G]		FALSE	1.01007e-06	0.000572698	1	1	11	O65390	O65390 [227-247]		0	2260.02	0	1.631	0.999906	0	178001	109155		High	High	High	0.0001305	1.779e-07	6.09	124.43	R.NADEEEGGELVFGGVDPNHFK.G	[227-247]	Used	Used
[K].QGLIKEPVFSFWLNR.[N]		FALSE	0.000792091	0.000572698	1	1	5	O65390	O65390 [212-226]		1	1834	0	0.01	5.76991e-17			63569.6		Not Found	High	High	0.0001305	0.0001546	2.43	164.76	K.QGLIKEPVFSFWLNR.N	[212-226]	Used	Used
[K].DQEFIEATKEPGITFVVAK.[F]		FALSE	7.60741e-06	0.000572698	1	1	8	O65390	O65390 [167-185]		1	2122.11	0	18.431	0.0252345	0	230735	12519.1		High	High	High	0.0001305	1.379e-06	3.98	132.99	K.DQEFIEATKEPGITFVVAK.F	[167-185]	Used	Used
[K].YHTVFDFGNEQVGFAEAA.[-]		FALSE	5.62543e-05	0.000572698	1	1	9	O65390	O65390 [489-506]		0	2001.9	0	1.254	0.871758	0	82203.7	65568.5		High	High	High	0.0001305	1.054e-05	5.91	153.6	K.YHTVFDFGNEQVGFAEAA.-	[489-506]	Used	Used
[K].FTVVFDTGSSNLWVPSSK.[C]		FALSE	2.36034e-05	0.000572698	1	1	10	O65390	O65390 [95-112]		0	1970.99	0	0.894	0.455203	0	36171.8	40479.9		High	High	High	0.0001305	4.351e-06	2.41	155.62	K.FTVVFDTGSSNLWVPSSK.C	[95-112]	Used	Used
[K].VGEGPVAQCISGFIALDVAPPR.[G]	1xCarbamidomethyl [C9]	FALSE	0.000350292	0.000572698	1	1	1	O65390	O65390 [454-475]		0	2253.17	0	1.251	0.687981	0	6370.71	5093.49		High	Peak Found	High	0.0001305	6.741e-05	2.69	171.99	K.VGEGPVAQCISGFIALDVAPPR.G	[454-475]	Used	Used
[K].VFDLAPEEYVLK.[VI]		FALSE	0.000347276	0.000572698	2	2	9	O65390; Q8VYL3	O65390 [442-453]; Q8VYL3 [449-460]		0	1422.75	0	1.876	0.97202	0	784719	418268	Shared	High	High	High	0.0001305	6.701e-05	2.88	145.44	K.VFDLAPEEYVLK.V	[442-453]	Used	Used
[K].FDGILGLGFQEISVGK.[A]		FALSE	7.74215e-06	0.000572698	1	1	6	O65390	O65390 [186-201]		0	1679.9	0	1.894	0.995742	0	100372	53004.8		High	High	High	0.0001305	1.406e-06	2.69	173.82	K.FDGILGLGFQEISVGK.A	[186-201]	Used	Used
[K].AAAIHYGTGAIAGFFSNDAVTVGDLVVK.[D]		FALSE	0.00256549	0.000987479	1	1	2	O65390	O65390 [139-166]		0	2764.43	0						No Quan Values	High	Not Found	High	0.0001991	0.0005182	2.02		K.AAAIHYGTGAIAGFFSNDAVTVGDLVVK.D	[139-166]	Not Used	Not Used
[R].ILNYVNELCER.[L]	1xCarbamidomethyl [C9]	FALSE	0.00275511	0.00143413	1	1	1	O65390	O65390 [403-413]		0	1422.7	0	1.381	0.710071	0	27019.6	19563.6		Peak Found	High	High	0.0002813	0.0005582	3.05	115.34	R.ILNYVNELCER.L	[403-413]	Used	Used
[K].EPVFSFWLNR.[N]		FALSE	0.00587374	0.00166669	1	1	5	O65390	O65390 [217-226]		0	1294.66	0	8.146	0.226724	0	85920.8	10547.1		High	High	High	0.0003948	0.001228	2	164.11	K.EPVFSFWLNR.N	[217-226]	Used	Used
[K].AAPVWYNMLK.[Q]		FALSE	0.0114318	0.00190722	1	1	5	O65390	O65390 [202-211]		0	1192.62	0	1.505	0.993138	0	134079	89091.8		High	High	High	0.0004264	0.002455	2.75	143.15	K.AAPVWYNMLK.Q	[202-211]	Used	Used
[K].GKHTYVPVTQK.[G]		FALSE	0.0123968	0.00190722	1	1	4	O65390	O65390 [248-258]		1	1257.69	0	1.081	0.919939	0	127239	117730		High	High	High	0.0004264	0.002673	2.12	47.52	K.GKHTYVPVTQK.G	[248-258]	Used	Used
[K].DQEFIEATK.[E]		FALSE	0.0185876	0.0029934	1	1	2	O65390	O65390 [167-175]		0	1080.52	0	2.05	0.999906	0	91737.3	44740.7		High	Peak Found	High	0.0006192	0.004087	2.79	70.63	K.DQEFIEATK.E	[167-175]	Used	Used
[K].EPGITFVVAK.[F]		FALSE	0.0296173	0.00462251	1	1	4	O65390	O65390 [176-185]		0	1060.6	0	8.115	0.218868	0	118693	14626		High	High	High	0.0009067	0.006688	2.19	109.25	K.EPGITFVVAK.F	[176-185]	Used	Used
[K].AAPVWYNMLK.[Q]	1xOxidation [M8]	FALSE	0.0365516	0.00486181	1	1	1	O65390	O65390 [202-211]		0	1208.61	0						No Quan Values	High	Not Found	High	0.0009702	0.00829	2.31		K.AAPVWYNMLK.Q	[202-211]	Not Used	Not Used
[K].HTYVPVTQK.[G]		FALSE	0.089016	0.00598748	1	1	3	O65390	O65390 [250-258]		0	1072.58	0	2.42	0.919939	0	481354	198894		High	Peak Found	High	0.001685	0.02005	1.95	48.79	K.HTYVPVTQK.G	[250-258]	Used	Used
O49326	Nitrile-specifier protein 2 OS=Arabidopsis thaliana OX=3702 GN=NSP2 PE=2 SV=1	0	FALSE	130.146	61	27	126	27	471	51.2	5.76	387.66	27	0	1.874	0.888502	51.11	3.37768e+06	1.63016e+06	High	High	1		0.906121	-0.27277
Annotated Sequence	Modifications	Contaminant	Qvality PEP	Qvality q-value	# Protein Groups	# Proteins	# PSMs	Master Protein Accessions	Positions in Master Proteins	Modifications in Master Proteins	# Missed Cleavages	Theo. MH+ [Da]	# Razor Quan Results	Abundance Ratio: (F4) / (F3)	Abundance Ratio Adj. P-Value: (F4) / (F3)	Abundance Ratio Variability [%]: (F4) / (F3)	Abundances (Grouped): F4	Abundances (Grouped): F3	Quan Info	Found in Sample: [S4] F4: Sample	Found in Sample: [S3] F3: Sample	Confidence (by Search Engine): Sequest HT	Percolator q-Value (by Search Engine): Sequest HT	Percolator PEP (by Search Engine): Sequest HT	XCorr (by Search Engine): Sequest HT	Top Apex RT [min]	Sequence in Protein	Positions in Proteins	Quan Usage	Quan Ratio Usage
[R].FDPYGPPGVPGFEPGR.[F]		FALSE	0.000709942	0.000572698	1	1	2	Q9M330	Q9M330 [261-276]		0	1688.81	0	3.136	0.925353	0	33352.3	10634.1		High	High	High	0.0001305	0.0001381	3.11	130.42	R.FDPYGPPGVPGFEPGR.F	[261-276]	Used	Used
[R].GGFGDGSMLVGPTDPR.[F]		FALSE	0.0211756	0.00332708	1	1	1	Q9M330	Q9M330 [218-233]		0	1562.73	0						No Quan Values	High	Not Found	High	0.0006776	0.00469	3.05		R.GGFGDGSMLVGPTDPR.F	[218-233]	Not Used	Not Used
Q9S9N1	Heat shock 70 kDa protein 5 OS=Arabidopsis thaliana OX=3702 GN=HSP70-5 PE=2 SV=1	0	FALSE	123.844	51	26	95	20	646	70.9	5.41	288.43	26	7	1.955	0.904944	71.38	3.39234e+06	1.77882e+06	High	High	1		0.967169	-0.291147
Annotated Sequence	Modifications	Contaminant	Qvality PEP	Qvality q-value	# Protein Groups	# Proteins	# PSMs	Master Protein Accessions	Positions in Master Proteins	Modifications in Master Proteins	# Missed Cleavages	Theo. MH+ [Da]	# Razor Quan Results	Abundance Ratio: (F4) / (F3)	Abundance Ratio Adj. P-Value: (F4) / (F3)	Abundance Ratio Variability [%]: (F4) / (F3)	Abundances (Grouped): F4	Abundances (Grouped): F3	Quan Info	Found in Sample: [S4] F4: Sample	Found in Sample: [S3] F3: Sample	Confidence (by Search Engine): Sequest HT	Percolator q-Value (by Search Engine): Sequest HT	Percolator PEP (by Search Engine): Sequest HT	XCorr (by Search Engine): Sequest HT	Top Apex RT [min]	Sequence in Protein	Positions in Proteins	Quan Usage	Quan Ratio Usage
[K].LLAEGLNQMKGIR.[V]	2xDeamidated [N7; Q8]	FALSE	0.0359051	0.00462251	1	1	1	Q8RXU4	Q8RXU4 [268-280]		1	1444.78	0	1.909	0.925353	0	32480.7	17016.8		High	Peak Found	High	0.0009067	0.008153	1.54	110.67	K.LLAEGLNQMKGIR.V	[268-280]	Used	Used
F4JVN6	Tripeptidyl-peptidase 2 OS=Arabidopsis thaliana OX=3702 GN=TPP2 PE=1 SV=1	0	FALSE	88.62	22	25	77	25	1380	152.3	6.07	198.54	25	0	1.908	0.893131	66.27	1.62521e+06	575284	High	High	1		0.932061	-0.280578
Annotated Sequence	Modifications	Contaminant	Qvality PEP	Qvality q-value	# Protein Groups	# Proteins	# PSMs	Master Protein Accessions	Positions in Master Proteins	Modifications in Master Proteins	# Missed Cleavages	Theo. MH+ [Da]	# Razor Quan Results	Abundance Ratio: (F4) / (F3)	Abundance Ratio Adj. P-Value: (F4) / (F3)	Abundance Ratio Variability [%]: (F4) / (F3)	Abundances (Grouped): F4	Abundances (Grouped): F3	Quan Info	Found in Sample: [S4] F4: Sample	Found in Sample: [S3] F3: Sample	Confidence (by Search Engine): Sequest HT	Percolator q-Value (by Search Engine): Sequest HT	Percolator PEP (by Search Engine): Sequest HT	XCorr (by Search Engine): Sequest HT	Top Apex RT [min]	Sequence in Protein	Positions in Proteins	Quan Usage	Quan Ratio Usage
[K].KRDDEYGISTESLK.[T]		FALSE	1.87056e-05	0.000572698	1	1	34	Q941A4	Q941A4 [192-205]		2	1640.81	0	0.955	0.875484	0	371772	389369		High	High	High	0.0001305	3.434e-06	5.64	76.86	K.KRDDEYGISTESLK.T	[192-205]	Used	Used
[R].LFESLDPEEQK.[L]		FALSE	0.000304974	0.000572698	1	1	4	Q941A4	Q941A4 [106-116]		0	1334.65	0	11.042	0.114246	0	718858	65100.8		High	Peak Found	High	0.0001305	5.849e-05	4.04	104.1	R.LFESLDPEEQK.L	[106-116]	Used	Used
[R].LFESLDPEEQKLWHSHDYEIQTGLLVTPR.[V]		FALSE	3.30896e-05	0.000572698	1	1	4	Q941A4	Q941A4 [106-134]		1	3480.74	0						No Quan Values	Not Found	High	High	0.0001305	6.151e-06	3.96		R.LFESLDPEEQKLWHSHDYEIQTGLLVTPR.V	[106-134]	Not Used	Not Used
[K].GLAVDIIETEMQK.[L]	1xOxidation [M11]	FALSE	7.31754e-05	0.000572698	1	1	1	Q941A4	Q941A4 [230-242]		0	1462.75	0	1.476	0.76914	0	18481.7	12521.2		High	Peak Found	High	0.0001305	1.377e-05	4.13	143.2	K.GLAVDIIETEMQK.L	[230-242]	Used	Used
[K].GLAVDIIETEMQK.[L]		FALSE	2.82553e-05	0.000572698	1	1	9	Q941A4	Q941A4 [230-242]		0	1446.75	0	1.243	0.941598	0	640264	515256		High	High	High	0.0001305	5.237e-06	4.74	143.75	K.GLAVDIIETEMQK.L	[230-242]	Used	Used
[K].NSMADYWVHHGK.[G]		FALSE	0.000373748	0.000572698	1	1	14	Q941A4	Q941A4 [218-229]		0	1444.64	0	0.869	0.837035	0	416867	479594		High	High	High	0.0001305	7.195e-05	4.14	86.07	K.NSMADYWVHHGK.G	[218-229]	Used	Used
[K].NSMADYWVHHGK.[G]	1xOxidation [M3]	FALSE	0.000533973	0.000572698	1	1	6	Q941A4	Q941A4 [218-229]		0	1460.64	0	1.148	0.760657	0	65613	57131.3		Peak Found	High	High	0.0001305	0.0001035	2.78	62.03	K.NSMADYWVHHGK.G	[218-229]	Used	Used
[K].LPLGAPSLMMSPQDVNMGK.[I]		FALSE	3.70353e-06	0.000572698	1	1	4	Q941A4	Q941A4 [166-184]		0	1985.99	0	2.503	0.999906	0	27074.6	10818.3		High	High	High	0.0001305	6.643e-07	4.22	144.19	K.LPLGAPSLMMSPQDVNMGK.I	[166-184]	Used	Used
[R].GDKLPLGAPSLMMSPQDVNMGK.[I]		FALSE	2.06921e-05	0.000572698	1	1	4	Q941A4	Q941A4 [163-184]		1	2286.13	0	1.668	0.997269	0	187515	112418		High	High	High	0.0001305	3.808e-06	4.79	135.5	R.GDKLPLGAPSLMMSPQDVNMGK.I	[163-184]	Used	Used
[R].GDKLPLGAPSLMMSPQDVNMGK.[I]	1xOxidation [M]	FALSE	3.77437e-05	0.000572698	1	1	4	Q941A4	Q941A4 [163-184]		1	2302.12	0	2.495	0.96464	0	84155.2	33729.4		High	High	High	0.0001305	7.023e-06	4.98	124.14	R.GDKLPLGAPSLMMSPQDVNMGK.I	[163-184]	Used	Used
[R].DDEYGISTESLK.[T]		FALSE	0.000348781	0.000572698	1	1	4	Q941A4	Q941A4 [194-205]		0	1356.62	0	2.408	0.966045	0	86640	35981		High	High	High	0.0001305	6.72e-05	4.36	94.93	R.DDEYGISTESLK.T	[194-205]	Used	Used
[K].NSMADYWVHHGK.[G]	1xDeamidated [N1]	FALSE	0.00138503	0.000987479	1	1	3	Q941A4	Q941A4 [218-229]		0	1445.63	0	0.984	0.715239	0	71412.2	72564.8		High	High	High	0.0001991	0.0002736	1.59	93.38	K.NSMADYWVHHGK.G	[218-229]	Used	Used
[R].QIEVNFYVHR.[L]		FALSE	0.00181701	0.000987479	1	1	10	Q941A4	Q941A4 [66-75]		0	1304.67	0	0.01	5.76991e-17			44278		Not Found	High	High	0.0001991	0.0003626	2.57	106.15	R.QIEVNFYVHR.L	[66-75]	Used	Used
[K].GAAMMQSLKPIK.[Q]		FALSE	0.00156809	0.000987479	1	1	3	Q941A4	Q941A4 [36-47]		0	1274.7	0	1.152	0.925353	0	110195	95682.4		High	High	High	0.0001991	0.0003114	2.91	85.16	K.GAAMMQSLKPIK.Q	[36-47]	Used	Used
[K].LWHSHDYEIQTGLLVTPR.[V]		FALSE	0.00316518	0.00143413	1	1	2	Q941A4	Q941A4 [117-134]		0	2165.11	0						No Quan Values	High	Not Found	High	0.0002813	0.0006464	1.95		K.LWHSHDYEIQTGLLVTPR.V	[117-134]	Not Used	Not Used
[K].TELENIAK.[T]		FALSE	0.00552757	0.00166669	1	1	4	Q941A4	Q941A4 [142-149]		0	917.494	0	1.027	0.903176	0	330132	321390		High	High	High	0.0003948	0.001156	2.72	66.11	K.TELENIAK.T	[142-149]	Used	Used
[K].FWCTWQTDR.[G]	1xCarbamidomethyl [C3]	FALSE	0.0104511	0.00190722	1	1	1	Q941A4	Q941A4 [154-162]		0	1299.56	0	1.441	0.744161	0	20084.6	13938.6		High	Peak Found	High	0.0004264	0.002238	2.51	116.03	K.FWCTWQTDR.G	[154-162]	Used	Used
[R].VGIMGPEK.[K]		FALSE	0.0221254	0.00332708	1	1	3	Q941A4	Q941A4 [209-216]		0	830.444	0	3.631	0.746478	0	331493	91304.8		High	Peak Found	High	0.0006776	0.004921	2.66	63.87	R.VGIMGPEK.K	[209-216]	Used	Used
[R].DGSENLPPGDPK.[T]		FALSE	0.026287	0.00400174	1	1	11	Q941A4	Q941A4 [15-26]		0	1225.57	0	0.972	0.768974	0	81925.3	84258.6		High	High	High	0.0007949	0.005899	2.45	51.24	R.DGSENLPPGDPK.T	[15-26]	Used	Used
[R].VGIMGPEKK.[N]		FALSE	0.0306575	0.00462251	1	1	2	Q941A4	Q941A4 [209-217]		1	958.539	0	0.613	0.639444	0	80731	131729		High	High	High	0.0009067	0.006915	2.71	49.26	R.VGIMGPEKK.N	[209-217]	Used	Used
P0DKC6	11-beta-hydroxysteroid dehydrogenase 1B OS=Arabidopsis thaliana OX=3702 GN=HSD1 PE=1 SV=1	0	FALSE	188.433	66	24	411	24	349	39.1	6.25	1307.55	24	0	1.247	0.517072	44.87	1.47887e+07	1.40069e+07	High	High	1		0.318461	-0.0958665
Annotated Sequence	Modifications	Contaminant	Qvality PEP	Qvality q-value	# Protein Groups	# Proteins	# PSMs	Master Protein Accessions	Positions in Master Proteins	Modifications in Master Proteins	# Missed Cleavages	Theo. MH+ [Da]	# Razor Quan Results	Abundance Ratio: (F4) / (F3)	Abundance Ratio Adj. P-Value: (F4) / (F3)	Abundance Ratio Variability [%]: (F4) / (F3)	Abundances (Grouped): F4	Abundances (Grouped): F3	Quan Info	Found in Sample: [S4] F4: Sample	Found in Sample: [S3] F3: Sample	Confidence (by Search Engine): Sequest HT	Percolator q-Value (by Search Engine): Sequest HT	Percolator PEP (by Search Engine): Sequest HT	XCorr (by Search Engine): Sequest HT	Top Apex RT [min]	Sequence in Protein	Positions in Proteins	Quan Usage	Quan Ratio Usage
[KR].KVPQVSTPTLVEVSR.[NS]	1xDeamidated [Q4]	TRUE	0.000196583	0.000572698	1	2	5	P02768	P02768 [438-452]		1	1640.92	0	100	5.76991e-17		32366.1			High	Not Found	High	0.0001305	3.748e-05	2.22	101.93	K.KVPQVSTPTLVEVSR.N	[438-452]	Used	Used
[KR].KVPQVSTPTLVEVSR.[NS]		TRUE	9.2297e-05	0.000572698	1	2	6	P02768	P02768 [438-452]		1	1639.94	0	15.776	0.0421373	0	448587	28434.1		High	High	High	0.0001305	1.742e-05	4.23	99.07	K.KVPQVSTPTLVEVSR.N	[438-452]	Used	Used
P15456	12S seed storage protein CRB OS=Arabidopsis thaliana OX=3702 GN=CRB PE=1 SV=2	0	FALSE	338.112	63	23	1102	21	455	50.5	6.99	3714.67	23	0	0.388	0.000736785	7.63	4.89204e+07	9.52405e+07	High	High	1		-1.36587	0.411168
Annotated Sequence	Modifications	Contaminant	Qvality PEP	Qvality q-value	# Protein Groups	# Proteins	# PSMs	Master Protein Accessions	Positions in Master Proteins	Modifications in Master Proteins	# Missed Cleavages	Theo. MH+ [Da]	# Razor Quan Results	Abundance Ratio: (F4) / (F3)	Abundance Ratio Adj. P-Value: (F4) / (F3)	Abundance Ratio Variability [%]: (F4) / (F3)	Abundances (Grouped): F4	Abundances (Grouped): F3	Quan Info	Found in Sample: [S4] F4: Sample	Found in Sample: [S3] F3: Sample	Confidence (by Search Engine): Sequest HT	Percolator q-Value (by Search Engine): Sequest HT	Percolator PEP (by Search Engine): Sequest HT	XCorr (by Search Engine): Sequest HT	Top Apex RT [min]	Sequence in Protein	Positions in Proteins	Quan Usage	Quan Ratio Usage
[K].GLDVIQQAQSGTGK.[T]		FALSE	9.64278e-05	0.000572698	1	3	1	P41377	P41377 [76-89]		0	1401.73	0	2.452	0.965986	0	85827.4	35001.3		High	Peak Found	High	0.0001305	1.816e-05	3.62	85.9	K.GLDVIQQAQSGTGK.T	[76-89]	Used	Used
[K].MFVLDEADEMLSR.[G]		FALSE	9.14734e-06	0.000572698	1	3	6	P41377	P41377 [184-196]		0	1555.71	0	2.932	0.93951	0	39623.7	13512		High	High	High	0.0001305	1.664e-06	4.47	158.81	K.MFVLDEADEMLSR.G	[184-196]	Used	Used
[R].VLITTDLLAR.[G]		FALSE	9.10925e-05	0.000572698	1	3	3	P41377	P41377 [331-340]		0	1114.68	0	0.324	0.00248956	0	12188.5	37563.7		Peak Found	High	High	0.0001305	1.717e-05	2.67	128.23	R.VLITTDLLAR.G	[331-340]	Used	Used
[K].RDELTLEGIK.[Q]		FALSE	0.00333305	0.00143413	1	4	2	P41377	P41377 [244-253]		1	1173.65	0	5.84	0.444602	0	139356	23861.9		Peak Found	High	High	0.0002813	0.0006828	2.42	92.56	K.RDELTLEGIK.Q	[244-253]	Used	Used
[R].MLFDIQK.[F]		FALSE	0.00330663	0.00143413	1	2	5	P41377	P41377 [389-395]		0	894.475	0	4.054	0.784452	0	63447.4	15651.1		High	High	High	0.0002813	0.0006752	2.1	114.55	R.MLFDIQK.F	[389-395]	Used	Used
[R].GIYAYGFEKPSAIQQR.[G]		FALSE	0.0271921	0.00400174	1	3	1	P41377	P41377 [53-68]		0	1827.94	0	1.092	0.633564	0	45664.8	41803.7		High	Peak Found	High	0.0007949	0.006095	1.51	105.46	R.GIYAYGFEKPSAIQQR.G	[53-68]	Used	Used
[R].DELTLEGIK.[Q]		FALSE	0.0742772	0.00598748	1	4	1	P41377	P41377 [245-253]		0	1017.55	0	100	5.76991e-17		22347			High	Not Found	High	0.00163	0.01687	2.22	105.62	R.DELTLEGIK.Q	[245-253]	Used	Used
[R].ALGDYQGVK.[V]		FALSE	0.0945836	0.00697113	1	1	1	P41377	P41377 [129-137]		0	950.494	0						No Quan Values	Not Found	High	High	0.001861	0.02131	2.67		R.ALGDYQGVK.V	[129-137]	Not Used	Not Used
Q9FZ42	NADPH-dependent aldehyde reductase 1, chloroplastic OS=Arabidopsis thaliana OX=3702 GN=ChlADR1 PE=1 SV=1	0	FALSE	192.367	82	23	238	23	288	31.4	6.54	829.3	23	0	2.258	0.96749	49.16	1.40794e+07	5.47949e+06	High	High	1		1.17505	-0.353724
Annotated Sequence	Modifications	Contaminant	Qvality PEP	Qvality q-value	# Protein Groups	# Proteins	# PSMs	Master Protein Accessions	Positions in Master Proteins	Modifications in Master Proteins	# Missed Cleavages	Theo. MH+ [Da]	# Razor Quan Results	Abundance Ratio: (F4) / (F3)	Abundance Ratio Adj. P-Value: (F4) / (F3)	Abundance Ratio Variability [%]: (F4) / (F3)	Abundances (Grouped): F4	Abundances (Grouped): F3	Quan Info	Found in Sample: [S4] F4: Sample	Found in Sample: [S3] F3: Sample	Confidence (by Search Engine): Sequest HT	Percolator q-Value (by Search Engine): Sequest HT	Percolator PEP (by Search Engine): Sequest HT	XCorr (by Search Engine): Sequest HT	Top Apex RT [min]	Sequence in Protein	Positions in Proteins	Quan Usage	Quan Ratio Usage
[R].NVTDLIMNVGAGGGGGAPVAAAAPAAGGGAAAAAPAAEEK.[K]		FALSE	5.37832e-06	0.000572698	1	1	5	Q8LEQ0	Q8LEQ0 [55-94]		0	3373.68	0	3.523	0.870291	0	56198.6	15950.1		High	High	High	0.0001305	9.7e-07	5.82	136.21	R.NVTDLIMNVGAGGGGGAPVAAAAPAAGGGAAAAAPAAEEK.K	[55-94]	Used	Used
Q9SKP0	Late embryogenesis abundant protein ECP63 OS=Arabidopsis thaliana OX=3702 GN=ECP63 PE=2 SV=1	0	FALSE	108.242	55	21	171	20	448	48.5	5.54	527.61	21	0	3.517	0.856971	83.41	4.19203e+06	1.11782e+06	High	High	1		1.81435	-0.546172
Annotated Sequence	Modifications	Contaminant	Qvality PEP	Qvality q-value	# Protein Groups	# Proteins	# PSMs	Master Protein Accessions	Positions in Master Proteins	Modifications in Master Proteins	# Missed Cleavages	Theo. MH+ [Da]	# Razor Quan Results	Abundance Ratio: (F4) / (F3)	Abundance Ratio Adj. P-Value: (F4) / (F3)	Abundance Ratio Variability [%]: (F4) / (F3)	Abundances (Grouped): F4	Abundances (Grouped): F3	Quan Info	Found in Sample: [S4] F4: Sample	Found in Sample: [S3] F3: Sample	Confidence (by Search Engine): Sequest HT	Percolator q-Value (by Search Engine): Sequest HT	Percolator PEP (by Search Engine): Sequest HT	XCorr (by Search Engine): Sequest HT	Top Apex RT [min]	Sequence in Protein	Positions in Proteins	Quan Usage	Quan Ratio Usage
[K].SGLVNEAAIDK.[A]		FALSE	0.000436482	0.000572698	1	1	2	Q9FLG1	Q9FLG1 [355-365]		0	1116.59	0	2.108	0.993138	0	105667	50136.1		Peak Found	High	High	0.0001305	8.443e-05	3.8	73.24	K.SGLVNEAAIDK.A	[355-365]	Used	Used
[R].GQETPGEDPLLASK.[Y]		FALSE	0.00104224	0.000987479	1	1	8	Q9FLG1	Q9FLG1 [185-198]		0	1441.72	0	2.18	0.993138	0	74298.4	34078.8		High	High	High	0.0001991	0.0002043	3.24	83.65	R.GQETPGEDPLLASK.Y	[185-198]	Used	Used
Q9LIF8	Jacalin-related lectin 36 OS=Arabidopsis thaliana OX=3702 GN=JAL36 PE=2 SV=1	0	FALSE	127.524	63	21	126	21	460	49.7	6.49	395.18	21	0	2.804	0.952508	77.59	2.87092e+06	811547	High	High	1		1.48749	-0.447778
Annotated Sequence	Modifications	Contaminant	Qvality PEP	Qvality q-value	# Protein Groups	# Proteins	# PSMs	Master Protein Accessions	Positions in Master Proteins	Modifications in Master Proteins	# Missed Cleavages	Theo. MH+ [Da]	# Razor Quan Results	Abundance Ratio: (F4) / (F3)	Abundance Ratio Adj. P-Value: (F4) / (F3)	Abundance Ratio Variability [%]: (F4) / (F3)	Abundances (Grouped): F4	Abundances (Grouped): F3	Quan Info	Found in Sample: [S4] F4: Sample	Found in Sample: [S3] F3: Sample	Confidence (by Search Engine): Sequest HT	Percolator q-Value (by Search Engine): Sequest HT	Percolator PEP (by Search Engine): Sequest HT	XCorr (by Search Engine): Sequest HT	Top Apex RT [min]	Sequence in Protein	Positions in Proteins	Quan Usage	Quan Ratio Usage
[K].LDAFLSQGK.[E]		FALSE	0.000646804	0.000572698	1	1	7	P57751	P57751 [206-214]		0	978.525	0	3.551	0.863002	0	77150.4	21723.4		High	High	High	0.0001305	0.0001256	2.91	86.89	K.LDAFLSQGK.E	[206-214]	Used	Used
[K].SGFINLVSR.[Y]		FALSE	0.00024653	0.000572698	1	1	1	P57751	P57751 [28-36]		0	992.552	0	2.228	0.997269	0	69388.5	31146		High	Peak Found	High	0.0001305	4.73e-05	2.01	116.86	K.SGFINLVSR.Y	[28-36]	Used	Used
[K].SAVDGLTEMSENEK.[S]		FALSE	8.87058e-06	0.000572698	1	1	12	P57751	P57751 [14-27]		0	1509.67	0	3.126	0.898399	0	92027.2	29438.1		High	High	High	0.0001305	1.612e-06	4.86	89.97	K.SAVDGLTEMSENEK.S	[14-27]	Used	Used
[K].IQTPTDEIVVPYDK.[M]		FALSE	0.000160138	0.000572698	1	1	5	P57751	P57751 [50-63]		0	1617.84	0	3.227	0.853941	0	124240	38502.3		High	High	High	0.0001305	3.044e-05	3.9	113.1	K.IQTPTDEIVVPYDK.M	[50-63]	Used	Used
[K].VQLLEIAQVPDEHVNEFK.[S]		FALSE	5.80074e-05	0.000572698	2	2	2	Q9M9P3; P57751	Q9M9P3 [267-284]; P57751 [268-285]		0	2108.1	0	1.155	0.700344	0	59812.4	51773.3	Shared	High	High	High	0.0001305	1.086e-05	4.35	136.18	K.VQLLEIAQVPDEHVNEFK.S	[268-285]	Used	Used
[R].VVADEFVPWPSK.[G]		FALSE	2.95226e-05	0.000572698	2	2	6	Q9M9P3; P57751	Q9M9P3 [168-179]; P57751 [169-180]		0	1373.71	0	2.329	0.963438	0	113613	48777.1	Shared	High	High	High	0.0001305	5.481e-06	4.51	134.21	R.VVADEFVPWPSK.G	[169-180]	Used	Used
[R].FFDNAIGVNVPR.[S]		FALSE	0.000123203	0.000572698	2	2	2	Q9M9P3; P57751	Q9M9P3 [342-353]; P57751 [343-354]		0	1348.7	0	1.441	0.898399	0	79397.6	55109.3	Shared	High	Peak Found	High	0.0001305	2.334e-05	3.61	123.33	R.FFDNAIGVNVPR.S	[343-354]	Used	Used
[R].FFDNAIGVNVPR.[S]	1xDeamidated [N4]	FALSE	0.000718992	0.000572698	2	2	2	Q9M9P3; P57751	Q9M9P3 [342-353]; P57751 [343-354]		0	1349.68	0						No Quan Values	High	Not Found	High	0.0001305	0.0001401	3.27		R.FFDNAIGVNVPR.S	[343-354]	Not Used	Not Used
[R].YLSGEAQHIEWSK.[I]		FALSE	1.79812e-05	0.000572698	2	2	3	Q9M9P3; P57751	Q9M9P3 [36-48]; P57751 [37-49]		0	1547.75	0	5.103	0.595303	0	47530.7	9313.76	Shared	High	Peak Found	High	0.0001305	3.303e-06	4.43	89.75	R.YLSGEAQHIEWSK.I	[37-49]	Used	Used
[R].TNPTNPAIELGPEFK.[K]		FALSE	0.00151876	0.000987479	1	1	2	P57751	P57751 [388-402]		0	1627.83	0	100	5.76991e-17		65811.2			High	High	High	0.0001991	0.0003015	2.67	119.17	R.TNPTNPAIELGPEFK.K	[388-402]	Used	Used
[K].VPLVLMNSFNTHDDTQK.[I]		FALSE	0.00340008	0.00143413	1	1	1	P57751	P57751 [130-146]		0	1958.96	0						No Quan Values	Not Found	High	High	0.0002813	0.000697	2.81		K.VPLVLMNSFNTHDDTQK.I	[130-146]	Not Used	Not Used
[K].SIPSIVELDSLK.[V]		FALSE	0.00344099	0.00166669	2	2	3	Q9M9P3; P57751	Q9M9P3 [412-423]; P57751 [413-424]		0	1300.74	0	2.253	0.993138	0	44474.7	19744.4	Shared	High	High	High	0.0003407	0.0007056	1.29	139.76	K.SIPSIVELDSLK.V	[413-424]	Used	Used
[K].MEIIPNPK.[E]		FALSE	0.00898873	0.00190722	2	2	3	Q9M9P3; P57751	Q9M9P3 [315-322]; P57751 [316-323]		0	941.512	0	4.654	0.678213	0	76717.5	16483.3	Shared	High	Peak Found	High	0.0004264	0.001908	2.47	87.27	K.MEIIPNPK.E	[316-323]	Used	Used
[K].KLVEADALK.[M]		FALSE	0.142323	0.00875015	2	2	1	Q9M9P3; P57751	Q9M9P3 [306-314]; P57751 [307-315]		1	986.588	0	1.69	0.919165	0	54057.9	31989.2	Shared	High	Peak Found	High	0.002458	0.03171	2.41	60.85	K.KLVEADALK.M	[307-315]	Used	Used
Q9LHA8	Probable mediator of RNA polymerase II transcription subunit 37c OS=Arabidopsis thaliana OX=3702 GN=MED37C PE=1 SV=1	0	FALSE	127.487	43	21	113	9	650	71.1	5.25	382.5	21	8	2.604	0.98721	20.31	1.78484e+06	630348	High	High	1		1.38073	-0.415641
Annotated Sequence	Modifications	Contaminant	Qvality PEP	Qvality q-value	# Protein Groups	# Proteins	# PSMs	Master Protein Accessions	Positions in Master Proteins	Modifications in Master Proteins	# Missed Cleavages	Theo. MH+ [Da]	# Razor Quan Results	Abundance Ratio: (F4) / (F3)	Abundance Ratio Adj. P-Value: (F4) / (F3)	Abundance Ratio Variability [%]: (F4) / (F3)	Abundances (Grouped): F4	Abundances (Grouped): F3	Quan Info	Found in Sample: [S4] F4: Sample	Found in Sample: [S3] F3: Sample	Confidence (by Search Engine): Sequest HT	Percolator q-Value (by Search Engine): Sequest HT	Percolator PEP (by Search Engine): Sequest HT	XCorr (by Search Engine): Sequest HT	Top Apex RT [min]	Sequence in Protein	Positions in Proteins	Quan Usage	Quan Ratio Usage
[K].YVDNFHQYHLSFK.[R]	2xDeamidated [N4; Q7]	FALSE	0.0783517	0.00598748	1	1	2	Q9SRQ6	Q9SRQ6 [222-234]		0	1699.78	0	2.4	0.999906	0	39182.8	16324.2		High	Peak Found	High	0.00163	0.0177	2.37	104.98	K.YVDNFHQYHLSFK.R	[222-234]	Used	Used
Q9LW12	Late embryogenesis abundant protein 29 OS=Arabidopsis thaliana OX=3702 GN=LEA29 PE=2 SV=1	0	FALSE	138.388	77	21	430	21	225	24.2	8.85	1234.72	21	0	2.475	0.999265	71.03	2.97213e+07	1.24558e+07	High	High	1		1.30743	-0.393575
Annotated Sequence	Modifications	Contaminant	Qvality PEP	Qvality q-value	# Protein Groups	# Proteins	# PSMs	Master Protein Accessions	Positions in Master Proteins	Modifications in Master Proteins	# Missed Cleavages	Theo. MH+ [Da]	# Razor Quan Results	Abundance Ratio: (F4) / (F3)	Abundance Ratio Adj. P-Value: (F4) / (F3)	Abundance Ratio Variability [%]: (F4) / (F3)	Abundances (Grouped): F4	Abundances (Grouped): F3	Quan Info	Found in Sample: [S4] F4: Sample	Found in Sample: [S3] F3: Sample	Confidence (by Search Engine): Sequest HT	Percolator q-Value (by Search Engine): Sequest HT	Percolator PEP (by Search Engine): Sequest HT	XCorr (by Search Engine): Sequest HT	Top Apex RT [min]	Sequence in Protein	Positions in Proteins	Quan Usage	Quan Ratio Usage
[K].NNAGYPHNVVFDEDEIPSGVDVAK.[I]		FALSE	5.14736e-06	0.000572698	1	1	6	P42699	P42699 [99-122]		0	2586.21	0	3.299	0.83179	0	142059	43055.5		High	High	High	0.0001305	9.291e-07	5.11	122.41	K.NNAGYPHNVVFDEDEIPSGVDVAK.I	[99-122]	Used	Used
[K].NNAGYPHNVVFDEDEIPSGVDVAK.[I]	1xDeamidated [N]	FALSE	0.00486562	0.00166669	1	1	6	P42699	P42699 [99-122]		0	2587.19	0	2.871	0.940392	0	52599.6	18322.1		High	High	High	0.0003407	0.001013	2.7	129.83	K.NNAGYPHNVVFDEDEIPSGVDVAK.I	[99-122]	Used	Used
Q9XI01	Protein disulfide isomerase-like 1-1 OS=Arabidopsis thaliana OX=3702 GN=PDIL1-1 PE=1 SV=1	0	FALSE	82.375	45	20	86	17	501	55.6	4.92	231.25	20	2	1.985	0.910854	65.51	1.82058e+06	698512	High	High	1		0.989139	-0.297761
Annotated Sequence	Modifications	Contaminant	Qvality PEP	Qvality q-value	# Protein Groups	# Proteins	# PSMs	Master Protein Accessions	Positions in Master Proteins	Modifications in Master Proteins	# Missed Cleavages	Theo. MH+ [Da]	# Razor Quan Results	Abundance Ratio: (F4) / (F3)	Abundance Ratio Adj. P-Value: (F4) / (F3)	Abundance Ratio Variability [%]: (F4) / (F3)	Abundances (Grouped): F4	Abundances (Grouped): F3	Quan Info	Found in Sample: [S4] F4: Sample	Found in Sample: [S3] F3: Sample	Confidence (by Search Engine): Sequest HT	Percolator q-Value (by Search Engine): Sequest HT	Percolator PEP (by Search Engine): Sequest HT	XCorr (by Search Engine): Sequest HT	Top Apex RT [min]	Sequence in Protein	Positions in Proteins	Quan Usage	Quan Ratio Usage
[K].NVSADVAATTR.[I]		FALSE	0.000749955	0.000572698	1	1	1	P48491	P48491 [196-206]		0	1104.56	0	1.307	0.959731	0	155436	118910		High	Peak Found	High	0.0001305	0.0001463	3.68	57.19	K.NVSADVAATTR.I	[196-206]	Used	Used
[R].EAGSTMDVVAAQTK.[A]		FALSE	3.90916e-05	0.000572698	1	1	1	P48491	P48491 [136-149]		0	1407.68	0	6.266	0.382138	0	478289	76326.6		High	Peak Found	High	0.0001305	7.269e-06	4.57	71.63	R.EAGSTMDVVAAQTK.A	[136-149]	Used	Used
[R].AILNESSEFVGDK.[V]		FALSE	0.00046555	0.000572698	1	1	2	P48491	P48491 [101-113]		0	1408.7	0	11.767	0.0973515	0	215209	18289.8		High	Peak Found	High	0.0001305	8.993e-05	3.84	99.9	R.AILNESSEFVGDK.V	[101-113]	Used	Used
[R].VTNWSNVVIAYEPVWAIGTGK.[V]		FALSE	0.000218251	0.000572698	1	1	4	P48491	P48491 [155-175]		0	2304.2	0	0.01	5.76991e-17			16533		High	High	High	0.0001305	9.116e-05	2.66	179.59	R.VTNWSNVVIAYEPVWAIGTGK.V	[155-175]	Used	Used
[R].IIYGGSVNGGNCK.[E]	1xCarbamidomethyl [C12]; 1xDeamidated [N8]	FALSE	0.0055038	0.00166669	1	1	1	P48491	P48491 [207-219]		0	1339.63	0	2.642	0.99001	0	30047.1	11371.9		High	Peak Found	High	0.0003948	0.001152	3.75	65.34	R.IIYGGSVNGGNCK.E	[207-219]	Used	Used
[K].VAYALAQGLK.[V]		FALSE	0.012271	0.00190722	1	1	2	P48491	P48491 [114-123]		0	1033.6	0	6.735	0.355045	0	137059	20351.2		High	High	High	0.0004264	0.002637	1.98	95.26	K.VAYALAQGLK.V	[114-123]	Used	Used
Q9ZWA9	12S seed storage protein CRD OS=Arabidopsis thaliana OX=3702 GN=CRD PE=1 SV=1	0	FALSE	174.376	56	19	285	19	451	49.6	5.71	827.24	19	0	0.976	0.251139	54.02	9.62039e+06	9.78836e+06	High	High	1		-0.0350469	0.0105502
Annotated Sequence	Modifications	Contaminant	Qvality PEP	Qvality q-value	# Protein Groups	# Proteins	# PSMs	Master Protein Accessions	Positions in Master Proteins	Modifications in Master Proteins	# Missed Cleavages	Theo. MH+ [Da]	# Razor Quan Results	Abundance Ratio: (F4) / (F3)	Abundance Ratio Adj. P-Value: (F4) / (F3)	Abundance Ratio Variability [%]: (F4) / (F3)	Abundances (Grouped): F4	Abundances (Grouped): F3	Quan Info	Found in Sample: [S4] F4: Sample	Found in Sample: [S3] F3: Sample	Confidence (by Search Engine): Sequest HT	Percolator q-Value (by Search Engine): Sequest HT	Percolator PEP (by Search Engine): Sequest HT	XCorr (by Search Engine): Sequest HT	Top Apex RT [min]	Sequence in Protein	Positions in Proteins	Quan Usage	Quan Ratio Usage
[K].SSVLMDVKPWDDETDMK.[K]		FALSE	0.000261997	0.000572698	1	1	4	Q9SCX3	Q9SCX3 [136-152]		0	1995.9	0	2.669	0.964424	0	62513.1	23419.5		High	High	High	0.0001305	5.03e-05	1.75	125.66	K.SSVLMDVKPWDDETDMK.K	[136-152]	Used	Used
[R].GVEMPGLFWGASK.[L]		FALSE	0.000347276	0.000572698	1	1	6	Q9SCX3	Q9SCX3 [160-172]		0	1378.68	0	2.096	0.978003	0	53689.9	25620.7		High	High	High	0.0001305	6.684e-05	3.35	150.97	R.GVEMPGLFWGASK.L	[160-172]	Used	Used
[K].VYAAVPVKPSDAFPNASK.[W]		FALSE	0.000256366	0.000572698	1	1	7	Q9SCX3	Q9SCX3 [39-56]		0	1860.99	0	100	5.76991e-17		32322.1			High	Not Found	High	0.0001305	4.901e-05	3.87	100.69	K.VYAAVPVKPSDAFPNASK.W	[39-56]	Used	Used
[K].WYESVASQLAK.[S]		FALSE	7.51246e-05	0.000572698	1	1	2	Q9SCX3	Q9SCX3 [57-67]		0	1281.65	0	3.342	0.853941	0	107868	32278.8		High	High	High	0.0001305	1.41e-05	2.9	109.16	K.WYESVASQLAK.S	[57-67]	Used	Used
[K].TYISGDQLSVDDVK.[V]		FALSE	0.000367347	0.000572698	2	2	3	Q9SCX3; Q84WM9	Q9SCX3 [25-38]; Q84WM9 [25-38]		0	1539.75	0	3.76	0.735042	0	164766	43823.4	Shared	High	High	High	0.0001305	7.093e-05	4.47	101.13	K.TYISGDQLSVDDVK.V	[25-38]	Used	Used
[K].SVEEHLAGK.[T]		FALSE	0.0112047	0.00190722	1	1	3	Q9SCX3	Q9SCX3 [16-24]		0	969.5	0	3.434	0.769935	0	183830	53529.9		High	Peak Found	High	0.0004264	0.002406	2.84	42.03	K.SVEEHLAGK.T	[16-24]	Used	Used
Q9FK91	Protein ADP-ribosyltransferase PARP3 OS=Arabidopsis thaliana OX=3702 GN=PARP3 PE=2 SV=2	0	FALSE	74.97	30	18	101	18	814	91.3	5.22	266.83	18	0	1.824	0.874367	54.63	809944	386553	High	High	1		0.867106	-0.261025
Annotated Sequence	Modifications	Contaminant	Qvality PEP	Qvality q-value	# Protein Groups	# Proteins	# PSMs	Master Protein Accessions	Positions in Master Proteins	Modifications in Master Proteins	# Missed Cleavages	Theo. MH+ [Da]	# Razor Quan Results	Abundance Ratio: (F4) / (F3)	Abundance Ratio Adj. P-Value: (F4) / (F3)	Abundance Ratio Variability [%]: (F4) / (F3)	Abundances (Grouped): F4	Abundances (Grouped): F3	Quan Info	Found in Sample: [S4] F4: Sample	Found in Sample: [S3] F3: Sample	Confidence (by Search Engine): Sequest HT	Percolator q-Value (by Search Engine): Sequest HT	Percolator PEP (by Search Engine): Sequest HT	XCorr (by Search Engine): Sequest HT	Top Apex RT [min]	Sequence in Protein	Positions in Proteins	Quan Usage	Quan Ratio Usage
[K].LLAMYLSSPENK.[E]		FALSE	0.0299594	0.00462251	1	1	1	Q9SA78	Q9SA78 [76-87]		0	1365.71	0	3.233	0.918181	0	51790.4	16017.2		High	Peak Found	High	0.0009067	0.006765	2.23	116.84	K.LLAMYLSSPENK.E	[76-87]	Used	Used
O65390	Aspartic proteinase A1 OS=Arabidopsis thaliana OX=3702 GN=APA1 PE=1 SV=1	0	FALSE	87.621	46	18	96	16	506	54.6	5.54	254.52	18	2	1.876	0.888502	49.19	2.59629e+06	1.29786e+06	High	High	1		0.90766	-0.273233
Annotated Sequence	Modifications	Contaminant	Qvality PEP	Qvality q-value	# Protein Groups	# Proteins	# PSMs	Master Protein Accessions	Positions in Master Proteins	Modifications in Master Proteins	# Missed Cleavages	Theo. MH+ [Da]	# Razor Quan Results	Abundance Ratio: (F4) / (F3)	Abundance Ratio Adj. P-Value: (F4) / (F3)	Abundance Ratio Variability [%]: (F4) / (F3)	Abundances (Grouped): F4	Abundances (Grouped): F3	Quan Info	Found in Sample: [S4] F4: Sample	Found in Sample: [S3] F3: Sample	Confidence (by Search Engine): Sequest HT	Percolator q-Value (by Search Engine): Sequest HT	Percolator PEP (by Search Engine): Sequest HT	XCorr (by Search Engine): Sequest HT	Top Apex RT [min]	Sequence in Protein	Positions in Proteins	Quan Usage	Quan Ratio Usage
[K].LSDRFPQPYANESAAR.[F]		FALSE	0.000554906	0.000572698	1	1	4	Q9LK29	Q9LK29 [153-168]		1	1821.89	0	2.71	0.977289	0	28048.8	10350.9		High	Peak Found	High	0.0001305	0.0001078	3.42	87.55	K.LSDRFPQPYANESAAR.F	[153-168]	Used	Used
[R].FANGGAYPPDLSLITK.[A]	1xDeamidated [N3]	FALSE	0.00186824	0.000987479	1	1	1	Q9LK29	Q9LK29 [169-184]		0	1664.85	0	100	5.76991e-17		1.71788e+06			High	Not Found	High	0.0001991	0.0003722	2.9	137.25	R.FANGGAYPPDLSLITK.A	[169-184]	Used	Used
[R].DLVGVAYTEEEAK.[A]		FALSE	0.0113745	0.00190722	1	2	1	Q9LK29	Q9LK29 [116-128]		0	1423.7	0	2.262	0.974754	0	30987.9	13698.2		Peak Found	High	High	0.0004264	0.002435	2.57	102.86	R.DLVGVAYTEEEAK.A	[116-128]	Used	Used
[R].EGLHYNPYFPGGAIAMPK.[M]		FALSE	0.0342464	0.00462251	1	2	1	Q9LK29	Q9LK29 [211-228]		0	1961.96	0	4.298	0.835489	0	16360.6	3806.38		High	Peak Found	High	0.0009067	0.007776	1.75	133.22	R.EGLHYNPYFPGGAIAMPK.M	[211-228]	Used	Used
Q9ASR1	Elongation factor 2 OS=Arabidopsis thaliana OX=3702 GN=LOS1 PE=1 SV=1	0	FALSE	76.515	29	18	67	18	843	93.8	6.25	199.52	18	0	2.25	0.964439	82.64	1.12713e+06	546802	High	High	1		1.16993	-0.352183
Annotated Sequence	Modifications	Contaminant	Qvality PEP	Qvality q-value	# Protein Groups	# Proteins	# PSMs	Master Protein Accessions	Positions in Master Proteins	Modifications in Master Proteins	# Missed Cleavages	Theo. MH+ [Da]	# Razor Quan Results	Abundance Ratio: (F4) / (F3)	Abundance Ratio Adj. P-Value: (F4) / (F3)	Abundance Ratio Variability [%]: (F4) / (F3)	Abundances (Grouped): F4	Abundances (Grouped): F3	Quan Info	Found in Sample: [S4] F4: Sample	Found in Sample: [S3] F3: Sample	Confidence (by Search Engine): Sequest HT	Percolator q-Value (by Search Engine): Sequest HT	Percolator PEP (by Search Engine): Sequest HT	XCorr (by Search Engine): Sequest HT	Top Apex RT [min]	Sequence in Protein	Positions in Proteins	Quan Usage	Quan Ratio Usage
[R].NQYDTDVTTWSPTGR.[L]		FALSE	6.36006e-05	0.000572698	1	2	4	P34066	P34066 [4-18]		0	1740.78	0	3.224	0.919939	0	46141.3	14311.7		High	High	High	0.0001305	1.191e-05	4.1	105.38	R.NQYDTDVTTWSPTGR.L	[4-18]	Used	Used
[R].SESINHSFTYESPLPVGR.[L]		FALSE	0.00037862	0.000572698	1	2	7	P34066	P34066 [90-107]		0	2019.98	0	4.719	0.621334	0	126087	26718.7		High	High	High	0.0001305	7.289e-05	4.81	113.85	R.SESINHSFTYESPLPVGR.L	[90-107]	Used	Used
[K].VIDTFEKVPEEEEGEGEAGEGEAEAAEAAPAER.[G]		FALSE	2.47932e-07	0.000572698	1	1	9	P34066	P34066 [231-263]		1	3445.54	0	3.483	0.863002	0	89071.8	25576.6		High	High	High	0.0001305	4.272e-08	6.45	109.4	K.VIDTFEKVPEEEEGEGEAGEGEAEAAEAAPAER.G	[231-263]	Used	Used
O04005	1-Cys peroxiredoxin PER1 OS=Arabidopsis thaliana OX=3702 GN=PER1 PE=2 SV=1	0	FALSE	88.778	80	17	129	17	216	24.1	6.61	339.2	17	0	1.744	0.864878	54.8	5.89926e+06	2.76342e+06	High	High	1		0.8024	-0.241546
Annotated Sequence	Modifications	Contaminant	Qvality PEP	Qvality q-value	# Protein Groups	# Proteins	# PSMs	Master Protein Accessions	Positions in Master Proteins	Modifications in Master Proteins	# Missed Cleavages	Theo. MH+ [Da]	# Razor Quan Results	Abundance Ratio: (F4) / (F3)	Abundance Ratio Adj. P-Value: (F4) / (F3)	Abundance Ratio Variability [%]: (F4) / (F3)	Abundances (Grouped): F4	Abundances (Grouped): F3	Quan Info	Found in Sample: [S4] F4: Sample	Found in Sample: [S3] F3: Sample	Confidence (by Search Engine): Sequest HT	Percolator q-Value (by Search Engine): Sequest HT	Percolator PEP (by Search Engine): Sequest HT	XCorr (by Search Engine): Sequest HT	Top Apex RT [min]	Sequence in Protein	Positions in Proteins	Quan Usage	Quan Ratio Usage
[R].SGPEAFAFDSTGK.[G]		FALSE	0.00644411	0.00166669	1	1	5	P94111	P94111 [37-49]		0	1313.6	0	5.016	0.594556	0	31606.6	6301.76		High	High	High	0.0003948	0.001353	3.52	100.93	R.SGPEAFAFDSTGK.G	[37-49]	Used	Used
Q941A4	Oil body-associated protein 2A OS=Arabidopsis thaliana OX=3702 GN=OBAP2A PE=2 SV=1	0	FALSE	89.592	61	16	127	16	247	27.8	6.35	363.12	16	0	1.243	0.516572	34.34	3.64321e+06	2.56706e+06	High	High	1		0.313826	-0.0944711
Annotated Sequence	Modifications	Contaminant	Qvality PEP	Qvality q-value	# Protein Groups	# Proteins	# PSMs	Master Protein Accessions	Positions in Master Proteins	Modifications in Master Proteins	# Missed Cleavages	Theo. MH+ [Da]	# Razor Quan Results	Abundance Ratio: (F4) / (F3)	Abundance Ratio Adj. P-Value: (F4) / (F3)	Abundance Ratio Variability [%]: (F4) / (F3)	Abundances (Grouped): F4	Abundances (Grouped): F3	Quan Info	Found in Sample: [S4] F4: Sample	Found in Sample: [S3] F3: Sample	Confidence (by Search Engine): Sequest HT	Percolator q-Value (by Search Engine): Sequest HT	Percolator PEP (by Search Engine): Sequest HT	XCorr (by Search Engine): Sequest HT	Top Apex RT [min]	Sequence in Protein	Positions in Proteins	Quan Usage	Quan Ratio Usage
[K].IFVLPVSDVIR.[V]		FALSE	0.000513803	0.000572698	1	1	5	Q9ZST4	Q9ZST4 [165-175]		0	1257.76	0	1.247	0.712097	0	34779.1	27894.7		High	High	High	0.0001305	9.977e-05	2.82	155.43	K.IFVLPVSDVIR.V	[165-175]	Used	Used
[K].DQVESVINTIIEGAR.[T]		FALSE	6.50098e-05	0.000572698	1	1	4	Q9ZST4	Q9ZST4 [142-156]		0	1643.86	0	2.768	0.974754	0	24602.7	8889.18		High	High	High	0.0001305	1.22e-05	1.89	176.8	K.DQVESVINTIIEGAR.T	[142-156]	Used	Used
[R].IQQVSSALLK.[I]		FALSE	0.00375785	0.00166669	1	1	2	Q9ZST4	Q9ZST4 [86-95]		0	1086.65	0	1.203	0.768974	0	64075.9	53274.7		Peak Found	High	High	0.0003407	0.0007748	3.25	88.96	R.IQQVSSALLK.I	[86-95]	Used	Used
Q9LIF9	Beta-glucosidase 19 OS=Arabidopsis thaliana OX=3702 GN=BGLU19 PE=2 SV=1	0	FALSE	95.708	39	16	122	15	527	60	6.65	394.06	16	2	1.259	0.517072	69.91	4.31285e+06	2.16827e+06	High	High	1		0.332278	-0.100026
Annotated Sequence	Modifications	Contaminant	Qvality PEP	Qvality q-value	# Protein Groups	# Proteins	# PSMs	Master Protein Accessions	Positions in Master Proteins	Modifications in Master Proteins	# Missed Cleavages	Theo. MH+ [Da]	# Razor Quan Results	Abundance Ratio: (F4) / (F3)	Abundance Ratio Adj. P-Value: (F4) / (F3)	Abundance Ratio Variability [%]: (F4) / (F3)	Abundances (Grouped): F4	Abundances (Grouped): F3	Quan Info	Found in Sample: [S4] F4: Sample	Found in Sample: [S3] F3: Sample	Confidence (by Search Engine): Sequest HT	Percolator q-Value (by Search Engine): Sequest HT	Percolator PEP (by Search Engine): Sequest HT	XCorr (by Search Engine): Sequest HT	Top Apex RT [min]	Sequence in Protein	Positions in Proteins	Quan Usage	Quan Ratio Usage
[R].AFQLDASVVK.[E]		FALSE	0.00140746	0.000987479	1	2	2	P92996	P92996 [204-213]		0	1077.59	0	3.475	0.765034	0	173484	49927		High	High	High	0.0001991	0.0002777	3.17	105.67	R.AFQLDASVVK.E	[204-213]	Used	Used
Q39043	Mediator of RNA polymerase II transcription subunit 37f OS=Arabidopsis thaliana OX=3702 GN=MED37F PE=1 SV=2	0	FALSE	71.718	27	16	45	2	668	73.5	5.21	122.75	16	0	3.447	0.866331	64.78	42860.7	13122.8	High	High	1		1.78534	-0.537441
Annotated Sequence	Modifications	Contaminant	Qvality PEP	Qvality q-value	# Protein Groups	# Proteins	# PSMs	Master Protein Accessions	Positions in Master Proteins	Modifications in Master Proteins	# Missed Cleavages	Theo. MH+ [Da]	# Razor Quan Results	Abundance Ratio: (F4) / (F3)	Abundance Ratio Adj. P-Value: (F4) / (F3)	Abundance Ratio Variability [%]: (F4) / (F3)	Abundances (Grouped): F4	Abundances (Grouped): F3	Quan Info	Found in Sample: [S4] F4: Sample	Found in Sample: [S3] F3: Sample	Confidence (by Search Engine): Sequest HT	Percolator q-Value (by Search Engine): Sequest HT	Percolator PEP (by Search Engine): Sequest HT	XCorr (by Search Engine): Sequest HT	Top Apex RT [min]	Sequence in Protein	Positions in Proteins	Quan Usage	Quan Ratio Usage
[K].GEGPYAAVVDGR.[I]		FALSE	0.00012483	0.000572698	1	1	7	Q9M1J6	Q9M1J6 [63-74]		0	1190.58	0	100	5.76991e-17		62973.4			High	Not Found	High	0.0001305	2.368e-05	3.77	83.44	K.GEGPYAAVVDGR.I	[63-74]	Used	Used
[K].VGPEGGLAELIVDEAEGR.[K]		FALSE	1.86739e-06	0.000572698	1	1	6	Q9M1J6	Q9M1J6 [134-151]		0	1810.92	0	4.001	0.755331	0	97914.1	24469.5		High	High	High	0.0001305	3.315e-07	4.31	171.38	K.VGPEGGLAELIVDEAEGR.K	[134-151]	Used	Used
[R].DVFFVAVSGER.[S]		FALSE	0.0114318	0.00190722	1	1	1	Q9M1J6	Q9M1J6 [181-191]		0	1225.62	0						No Quan Values	Not Found	High	High	0.0004264	0.002449	1.93		R.DVFFVAVSGER.S	[181-191]	Not Used	Not Used
[K].TIPIPVAGPESIEFDPK.[G]		FALSE	0.0695076	0.00573653	1	1	1	Q9M1J6	Q9M1J6 [46-62]		0	1809.96	0	100	5.76991e-17		53723.7			High	Not Found	High	0.001534	0.01575	1.85	144.45	K.TIPIPVAGPESIEFDPK.G	[46-62]	Used	Used
[K].VPGYPDNIR.[L]		FALSE	0.106789	0.00791917	1	1	2	Q9M1J6	Q9M1J6 [256-264]		0	1030.53	0	1.778	0.99001	0	173965	97845.9		High	High	High	0.002084	0.02386	1.86	71.79	K.VPGYPDNIR.L	[256-264]	Used	Used
Q9LKR3	Mediator of RNA polymerase II transcription subunit 37a OS=Arabidopsis thaliana OX=3702 GN=MED37A PE=1 SV=1	0	FALSE	73.47	27	16	44	2	669	73.6	5.17	123.47	16	12	2.667	0.971451	73.27	1.00296e+06	262317	High	High	1		1.41522	-0.426023
Annotated Sequence	Modifications	Contaminant	Qvality PEP	Qvality q-value	# Protein Groups	# Proteins	# PSMs	Master Protein Accessions	Positions in Master Proteins	Modifications in Master Proteins	# Missed Cleavages	Theo. MH+ [Da]	# Razor Quan Results	Abundance Ratio: (F4) / (F3)	Abundance Ratio Adj. P-Value: (F4) / (F3)	Abundance Ratio Variability [%]: (F4) / (F3)	Abundances (Grouped): F4	Abundances (Grouped): F3	Quan Info	Found in Sample: [S4] F4: Sample	Found in Sample: [S3] F3: Sample	Confidence (by Search Engine): Sequest HT	Percolator q-Value (by Search Engine): Sequest HT	Percolator PEP (by Search Engine): Sequest HT	XCorr (by Search Engine): Sequest HT	Top Apex RT [min]	Sequence in Protein	Positions in Proteins	Quan Usage	Quan Ratio Usage
[K].SSEEAMNDYITK.[V]		FALSE	9.85618e-05	0.000572698	1	1	3	P57752	P57752 [67-78]		0	1387.6	0	2.405	0.942527	0	118698	49351.7		Peak Found	High	High	0.0001305	1.858e-05	4.13	80.97	K.SSEEAMNDYITK.V	[67-78]	Used	Used
Q96270	Late embryogenesis abundant protein 7 OS=Arabidopsis thaliana OX=3702 GN=LEA7 PE=2 SV=1	0	FALSE	93.691	73	16	219	16	169	18.1	7.61	752.07	16	0	2.441	0.999265	47.71	3.24677e+06	1.98026e+06	High	High	1		1.28747	-0.387568
Annotated Sequence	Modifications	Contaminant	Qvality PEP	Qvality q-value	# Protein Groups	# Proteins	# PSMs	Master Protein Accessions	Positions in Master Proteins	Modifications in Master Proteins	# Missed Cleavages	Theo. MH+ [Da]	# Razor Quan Results	Abundance Ratio: (F4) / (F3)	Abundance Ratio Adj. P-Value: (F4) / (F3)	Abundance Ratio Variability [%]: (F4) / (F3)	Abundances (Grouped): F4	Abundances (Grouped): F3	Quan Info	Found in Sample: [S4] F4: Sample	Found in Sample: [S3] F3: Sample	Confidence (by Search Engine): Sequest HT	Percolator q-Value (by Search Engine): Sequest HT	Percolator PEP (by Search Engine): Sequest HT	XCorr (by Search Engine): Sequest HT	Top Apex RT [min]	Sequence in Protein	Positions in Proteins	Quan Usage	Quan Ratio Usage
[K].GIHPEVANVASADEFEYKDPVDGSVSK.[H]		FALSE	0.000467553	0.000572698	1	1	2	Q9SGC1	Q9SGC1 [483-509]		1	2860.36	0						No Quan Values	High	Not Found	High	0.0001305	9.05e-05	3.34		K.GIHPEVANVASADEFEYKDPVDGSVSK.H	[483-509]	Not Used	Not Used
[K].YNMENGGPAPESITDK.[I]	1xDeamidated [N5]	FALSE	8.16453e-05	0.000572698	1	2	1	Q9SGC1	Q9SGC1 [138-153]		0	1723.75	0	100	5.76991e-17		30248.7			High	Not Found	High	0.0001305	1.536e-05	5.2	84.29	K.YNMENGGPAPESITDK.I	[138-153]	Used	Used
[R].YLFEDGSR.[L]		FALSE	0.00311532	0.00143413	1	2	2	Q9SGC1	Q9SGC1 [515-522]		0	986.458	0	100	5.76991e-17		30232.2			High	Not Found	High	0.0002813	0.0006355	2.21	87.03	R.YLFEDGSR.L	[515-522]	Used	Used
[R].SMPTSAALDVVAK.[NS]		FALSE	0.0114894	0.00190722	1	2	2	Q9SGC1	Q9SGC1 [346-358]		0	1289.68	0	2.398	0.995676	0	55935	23328.7		High	Peak Found	High	0.0004264	0.002463	2.7	104.73	R.SMPTSAALDVVAK.N	[346-358]	Used	Used
[K].LQSSLPEVNK.[I]		FALSE	0.0174267	0.0029934	1	1	2	Q9SGC1	Q9SGC1 [470-479]		0	1114.61	0	2.925	0.931167	0	67466.8	23065.7		High	High	High	0.0006192	0.003818	2.07	71.68	K.LQSSLPEVNK.I	[470-479]	Used	Used
[K].FFEVPTGWK.[F]		FALSE	0.0254164	0.00400174	1	2	4	Q9SGC1	Q9SGC1 [364-372]		0	1110.56	0	3.816	0.841733	0	27179.8	7122.35		High	High	High	0.0007949	0.005684	1.92	134.69	K.FFEVPTGWK.F	[364-372]	Used	Used
Q9ZVY7	Oil body-associated protein 1A OS=Arabidopsis thaliana OX=3702 GN=OBAP1A PE=2 SV=1	0	FALSE	70.545	51	15	90	15	241	27.3	6.71	210.93	15	0	2.925	0.930437	44.51	5.05048e+06	2.0921e+06	High	High	1		1.54844	-0.466126
Annotated Sequence	Modifications	Contaminant	Qvality PEP	Qvality q-value	# Protein Groups	# Proteins	# PSMs	Master Protein Accessions	Positions in Master Proteins	Modifications in Master Proteins	# Missed Cleavages	Theo. MH+ [Da]	# Razor Quan Results	Abundance Ratio: (F4) / (F3)	Abundance Ratio Adj. P-Value: (F4) / (F3)	Abundance Ratio Variability [%]: (F4) / (F3)	Abundances (Grouped): F4	Abundances (Grouped): F3	Quan Info	Found in Sample: [S4] F4: Sample	Found in Sample: [S3] F3: Sample	Confidence (by Search Engine): Sequest HT	Percolator q-Value (by Search Engine): Sequest HT	Percolator PEP (by Search Engine): Sequest HT	XCorr (by Search Engine): Sequest HT	Top Apex RT [min]	Sequence in Protein	Positions in Proteins	Quan Usage	Quan Ratio Usage
[R].DATTEDELWWGK.[G]		FALSE	0.00943179	0.00190722	1	1	1	Q9T074	Q9T074 [199-210]		0	1450.65	0	1.844	0.905762	0	19964.4	10828.6		High	Peak Found	High	0.0004264	0.002008	3.17	131.33	R.DATTEDELWWGK.G	[199-210]	Used	Used
[K].GSPNIEMDEHTFMVNR.[E]		FALSE	0.0586334	0.00545717	1	1	1	Q9T074	Q9T074 [211-226]		0	1876.83	0	2.379	0.993617	0	31161.7	13100.5		High	Peak Found	High	0.001365	0.01332	1.84	111.1	K.GSPNIEMDEHTFMVNR.E	[211-226]	Used	Used
Q04980	Low-temperature-induced 65 kDa protein OS=Arabidopsis thaliana OX=3702 GN=LTI65 PE=2 SV=2	0	FALSE	69.155	39	15	59	15	619	65.9	5.16	197.71	15	0	2.897	0.941753	59.01	1.65296e+06	586293	High	High	1	Acetyl [N-Term]	1.53456	-0.461948
Annotated Sequence	Modifications	Contaminant	Qvality PEP	Qvality q-value	# Protein Groups	# Proteins	# PSMs	Master Protein Accessions	Positions in Master Proteins	Modifications in Master Proteins	# Missed Cleavages	Theo. MH+ [Da]	# Razor Quan Results	Abundance Ratio: (F4) / (F3)	Abundance Ratio Adj. P-Value: (F4) / (F3)	Abundance Ratio Variability [%]: (F4) / (F3)	Abundances (Grouped): F4	Abundances (Grouped): F3	Quan Info	Found in Sample: [S4] F4: Sample	Found in Sample: [S3] F3: Sample	Confidence (by Search Engine): Sequest HT	Percolator q-Value (by Search Engine): Sequest HT	Percolator PEP (by Search Engine): Sequest HT	XCorr (by Search Engine): Sequest HT	Top Apex RT [min]	Sequence in Protein	Positions in Proteins	Quan Usage	Quan Ratio Usage
[K].IAQGVVGAVADK.[G]		FALSE	0.00676991	0.00166669	1	2	1	Q9SA34	Q9SA34 [427-438]		0	1127.64	0	7.619	0.250235	0	54827.2	7196.56		High	Peak Found	High	0.0003948	0.001425	2.85	72.1	K.IAQGVVGAVADK.G	[427-438]	Used	Used
P15460	2S seed storage protein 4 OS=Arabidopsis thaliana OX=3702 GN=AT2S4 PE=2 SV=1	0	FALSE	87.863	73	14	407	12	166	19.2	7.5	1022.73	14	2	0.797	0.107242	32.67	9.6341e+07	1.13559e+08	High	High	1		-0.327348	0.0985417
Annotated Sequence	Modifications	Contaminant	Qvality PEP	Qvality q-value	# Protein Groups	# Proteins	# PSMs	Master Protein Accessions	Positions in Master Proteins	Modifications in Master Proteins	# Missed Cleavages	Theo. MH+ [Da]	# Razor Quan Results	Abundance Ratio: (F4) / (F3)	Abundance Ratio Adj. P-Value: (F4) / (F3)	Abundance Ratio Variability [%]: (F4) / (F3)	Abundances (Grouped): F4	Abundances (Grouped): F3	Quan Info	Found in Sample: [S4] F4: Sample	Found in Sample: [S3] F3: Sample	Confidence (by Search Engine): Sequest HT	Percolator q-Value (by Search Engine): Sequest HT	Percolator PEP (by Search Engine): Sequest HT	XCorr (by Search Engine): Sequest HT	Top Apex RT [min]	Sequence in Protein	Positions in Proteins	Quan Usage	Quan Ratio Usage
[R].GGGPSLDDEFDFEGPQQGYQLLQQCCNELR.[Q]	2xCarbamidomethyl [C25; C26]	FALSE	0.000365763	0.000572698	1	1	4	P15459	P15459 [71-100]		0	3457.51	0						No Quan Values	High	Not Found	High	0.0001305	7.061e-05	5.33		R.GGGPSLDDEFDFEGPQQGYQLLQQCCNELR.Q	[71-100]	Not Used	Not Used
[R].QEEPVCVCPTLK.[Q]	2xCarbamidomethyl [C6; C8]	FALSE	0.000442151	0.000572698	1	1	9	P15459	P15459 [101-112]		0	1459.69	0	11.366	0.106423	0	1.28122e+07	1.12725e+06		High	High	High	0.0001305	8.56e-05	3.84	87.86	R.QEEPVCVCPTLK.Q	[101-112]	Used	Used
[KR].CQKEFQQSQHLR.[A]	1xCarbamidomethyl [C1]; 1xDeamidated [Q]	FALSE	0.000765905	0.000572698	2	2	6	P15458; P15459	P15458 [45-56]; P15459 [45-56]		1	1589.75	0	0.01	5.76991e-17			145620	Shared	Not Found	High	High	0.0001305	0.0001495	3.93	51.14	R.CQKEFQQSQHLR.A	[45-56]	Used	Used
[KR].CQKEFQQSQHLR.[A]	1xCarbamidomethyl [C1]	FALSE	2.44466e-05	0.000572698	2	2	27	P15458; P15459	P15458 [45-56]; P15459 [45-56]		1	1588.76	0	0.01	5.76991e-17	0	8374.72	1.91849e+06	Shared	Peak Found	High	High	0.0001305	4.507e-06	5.49	47.05	R.CQKEFQQSQHLR.A	[45-56]	Used	Used
[R].AVSLQGQHGPFQSR.[K]	1xDeamidated [Q]	FALSE	6.44424e-05	0.000572698	2	2	11	P15458; P15459	P15458 [124-137]; P15459 [117-130]		0	1512.76	0	0.825	0.816512	0	1.04905e+06	1.27213e+06	Shared	High	High	High	0.0001305	1.209e-05	5.23	80.08	R.AVSLQGQHGPFQSR.K	[117-130]	Used	Used
[R].AVSLQGQHGPFQSR.[K]		FALSE	1.95447e-05	0.000572698	2	2	118	P15458; P15459	P15458 [124-137]; P15459 [117-130]		0	1511.77	1	1.135	0.925353	0	7.05108e+07	6.21033e+07	Shared	High	High	High	0.0001305	3.594e-06	4.29	74.31	R.AVSLQGQHGPFQSR.K	[117-130]	Used	Used
[R].TVVEFEEDDASNPVGPR.[Q]		FALSE	1.68068e-06	0.000572698	1	1	9	P15459	P15459 [26-42]		0	1860.86	0	8.463	0.216355	0	545926	64503.6		High	High	High	0.0001305	2.977e-07	6.22	102.22	R.TVVEFEEDDASNPVGPR.Q	[26-42]	Used	Used
[K].EFQQSQHLR.[A]		FALSE	0.00138503	0.000987479	2	2	34	P15458; P15459	P15458 [48-56]; P15459 [48-56]		0	1172.58	0	0.345	0.26504	0	2.98141e+06	8.65312e+06	Shared	High	High	High	0.0001991	0.0002736	3.01	44.88	K.EFQQSQHLR.A	[48-56]	Used	Used
[K].YLPNICK.[I]	1xCarbamidomethyl [C6]	FALSE	0.00783878	0.00190722	3	3	38	P15460; P15458; P15459	P15460 [142-148]; P15458 [145-151]; P15459 [138-144]		0	907.471	0	1.034	0.906702	0	4.63563e+07	4.48133e+07	Shared	High	High	High	0.0004264	0.001655	1.34	74.26	K.YLPNICK.I	[138-144]	Not Used	Not Used
[R].KIYQSAK.[Y]		FALSE	0.0106073	0.00190722	1	1	23	P15459	P15459 [131-137]		1	837.483	0	0.93	0.863002	0	1.19238e+07	12824528		High	High	High	0.0004264	0.002267	2.35	24.6	R.KIYQSAK.Y	[131-137]	Used	Used
P00761	*CON* Trypsin precursor - sus scrofa - includes MSPRL added real and artificial sequences to mimic mass of Promega trypsin modifications	0	TRUE	159.074	46	14	535	12	741	79.4	8.31	1774.48	14	3	0.934	0.210462	26.53	1.16484e+08	1.27847e+08	High	High	1		-0.0985055	0.0296531
Annotated Sequence	Modifications	Contaminant	Qvality PEP	Qvality q-value	# Protein Groups	# Proteins	# PSMs	Master Protein Accessions	Positions in Master Proteins	Modifications in Master Proteins	# Missed Cleavages	Theo. MH+ [Da]	# Razor Quan Results	Abundance Ratio: (F4) / (F3)	Abundance Ratio Adj. P-Value: (F4) / (F3)	Abundance Ratio Variability [%]: (F4) / (F3)	Abundances (Grouped): F4	Abundances (Grouped): F3	Quan Info	Found in Sample: [S4] F4: Sample	Found in Sample: [S3] F3: Sample	Confidence (by Search Engine): Sequest HT	Percolator q-Value (by Search Engine): Sequest HT	Percolator PEP (by Search Engine): Sequest HT	XCorr (by Search Engine): Sequest HT	Top Apex RT [min]	Sequence in Protein	Positions in Proteins	Quan Usage	Quan Ratio Usage
[-].VVGVSLPR.[-]	1xAcetyl [N-Term]	TRUE	0.0243064	0.00400174	1	1	4	PromTArtA	PromTArtA [1-8]	PromTArtA 1xAcetyl [N-Term]	0	868.525	0	1.097	0.924269	0	351097	320001		High	High	High	0.0007949	0.005436	1.64	94.98	-.VVGVSLPR.-	[1-8]	Used	Used
Q9SK09	Vicilin-like seed storage protein At2g28490 OS=Arabidopsis thaliana OX=3702 GN=At2g28490 PE=2 SV=1	0	FALSE	110.501	35	14	192	14	511	55.7	6.16	453.5	14	0	1.102	0.392279	48.09	6.34804e+06	5.34666e+06	High	High	1		0.140124	-0.0421816
Annotated Sequence	Modifications	Contaminant	Qvality PEP	Qvality q-value	# Protein Groups	# Proteins	# PSMs	Master Protein Accessions	Positions in Master Proteins	Modifications in Master Proteins	# Missed Cleavages	Theo. MH+ [Da]	# Razor Quan Results	Abundance Ratio: (F4) / (F3)	Abundance Ratio Adj. P-Value: (F4) / (F3)	Abundance Ratio Variability [%]: (F4) / (F3)	Abundances (Grouped): F4	Abundances (Grouped): F3	Quan Info	Found in Sample: [S4] F4: Sample	Found in Sample: [S3] F3: Sample	Confidence (by Search Engine): Sequest HT	Percolator q-Value (by Search Engine): Sequest HT	Percolator PEP (by Search Engine): Sequest HT	XCorr (by Search Engine): Sequest HT	Top Apex RT [min]	Sequence in Protein	Positions in Proteins	Quan Usage	Quan Ratio Usage
[R].TTGIVLDSGDGVSHTVPIYEGYALPHAILR.[L]		FALSE	0.000507245	0.000572698	2	6	3	P53492; P0CJ46	P53492 [150-179]; P0CJ46 [150-179]		0	3151.64	0	0.52	0.116976	0	39635.8	76246.8	Shared	High	High	High	0.0001305	9.85e-05	4.51	148.64	R.TTGIVLDSGDGVSHTVPIYEGYALPHAILR.L	[150-179]	Not Used	Not Used
[K].AGFAGDDAPR.[A]		FALSE	0.000574175	0.000572698	3	8	7	Q96292; P53492; P0CJ46	Q96292 [21-30]; P53492 [21-30]; P0CJ46 [21-30]		0	976.448	0	1.404	0.877298	0	71976.6	51260.6	Shared	High	High	High	0.0001305	0.0001115	3.34	55.33	K.AGFAGDDAPR.A	[21-30]	Not Used	Not Used
[R].HTGVMVGMGQK.[D]		FALSE	0.00122217	0.000987479	2	5	3	P53492; P0CJ46	P53492 [42-52]; P0CJ46 [42-52]		0	1144.56	0	2.055	0.946843	0	162134	78888.8	Shared	High	High	High	0.0001991	0.0002409	2.57	58.34	R.HTGVMVGMGQK.D	[42-52]	Not Used	Not Used
[K].DAYVGDEAQSK.[R]		FALSE	0.00635861	0.00166669	3	7	2	Q96292; P53492; P0CJ46	Q96292 [53-63]; P53492 [53-63]; P0CJ46 [53-63]		0	1182.53	0	7.398	0.229431	0	33260.8	4496.1	Shared	High	Peak Found	High	0.0003948	0.001334	2.83	44.73	K.DAYVGDEAQSK.R	[53-63]	Not Used	Not Used
[K].NYELPDGQVITIGSER.[F]		FALSE	0.00378821	0.00166669	1	1	2	P0CJ46	P0CJ46 [241-256]		0	1790.89	0						No Quan Values	High	Not Found	High	0.0003407	0.0007784	1.95		K.NYELPDGQVITIGSER.F	[241-256]	Not Used	Not Used
[K].EITALAPSSMK.[I]		FALSE	0.00802378	0.00190722	3	7	5	Q96292; P53492; P0CJ46	Q96292 [318-328]; P53492 [318-328]; P0CJ46 [318-328]		0	1147.6	0	2.391	0.924348	0	270496	113142	Shared	High	High	High	0.0004264	0.0017	2.82	88.22	K.EITALAPSSMK.I	[318-328]	Not Used	Not Used
[R].VAPEEHPILLTEAPLNPK.[A]		FALSE	0.00999876	0.00190722	1	1	2	P0CJ46	P0CJ46 [98-115]		0	1968.08	2	4.14	0.765034	0	47158.8	11391.7		High	Peak Found	High	0.0004264	0.002138	2.35	114.26	R.VAPEEHPILLTEAPLNPK.A	[98-115]	Used	Used
Q39165	Oleosin 21.2 kDa OS=Arabidopsis thaliana OX=3702 GN=At5g40420 PE=2 SV=1	0	FALSE	92.454	45	14	475	14	199	21.3	9.36	1284.56	14	0	1.469	0.680674	96.97	3.66152e+07	3.05042e+07	High	High	1		0.554834	-0.167022
Annotated Sequence	Modifications	Contaminant	Qvality PEP	Qvality q-value	# Protein Groups	# Proteins	# PSMs	Master Protein Accessions	Positions in Master Proteins	Modifications in Master Proteins	# Missed Cleavages	Theo. MH+ [Da]	# Razor Quan Results	Abundance Ratio: (F4) / (F3)	Abundance Ratio Adj. P-Value: (F4) / (F3)	Abundance Ratio Variability [%]: (F4) / (F3)	Abundances (Grouped): F4	Abundances (Grouped): F3	Quan Info	Found in Sample: [S4] F4: Sample	Found in Sample: [S3] F3: Sample	Confidence (by Search Engine): Sequest HT	Percolator q-Value (by Search Engine): Sequest HT	Percolator PEP (by Search Engine): Sequest HT	XCorr (by Search Engine): Sequest HT	Top Apex RT [min]	Sequence in Protein	Positions in Proteins	Quan Usage	Quan Ratio Usage
[R].EALGALPLYQR.[T]		FALSE	0.000601723	0.000572698	1	2	4	Q9SUU5	Q9SUU5 [109-119]		0	1230.68	0	100	5.76991e-17		44972.5			High	Not Found	High	0.0001305	0.0001168	2.71	117.6	R.EALGALPLYQR.T	[109-119]	Used	Used
[K].DLQAVQTPFR.[G]		FALSE	0.00182425	0.000987479	1	1	3	Q9SUU5	Q9SUU5 [82-91]		0	1174.62	0	3.423	0.875277	0	39245.9	11464		High	High	High	0.0001991	0.0003631	3.17	104.25	K.DLQAVQTPFR.G	[82-91]	Used	Used
P22953	Probable mediator of RNA polymerase II transcription subunit 37e OS=Arabidopsis thaliana OX=3702 GN=MED37E PE=1 SV=3	0	FALSE	91.886	28	14	88	4	651	71.3	5.12	298.2	14	0	3.418	0.868857	108.05	213302	47343.3	High	High	1		1.77315	-0.533772
Annotated Sequence	Modifications	Contaminant	Qvality PEP	Qvality q-value	# Protein Groups	# Proteins	# PSMs	Master Protein Accessions	Positions in Master Proteins	Modifications in Master Proteins	# Missed Cleavages	Theo. MH+ [Da]	# Razor Quan Results	Abundance Ratio: (F4) / (F3)	Abundance Ratio Adj. P-Value: (F4) / (F3)	Abundance Ratio Variability [%]: (F4) / (F3)	Abundances (Grouped): F4	Abundances (Grouped): F3	Quan Info	Found in Sample: [S4] F4: Sample	Found in Sample: [S3] F3: Sample	Confidence (by Search Engine): Sequest HT	Percolator q-Value (by Search Engine): Sequest HT	Percolator PEP (by Search Engine): Sequest HT	XCorr (by Search Engine): Sequest HT	Top Apex RT [min]	Sequence in Protein	Positions in Proteins	Quan Usage	Quan Ratio Usage
[K].ISEYVAQLR.[R]		FALSE	0.000728152	0.000572698	1	1	5	Q9SRL5	Q9SRL5 [225-233]		0	1078.59	0	1.625	0.924348	0	72491.3	44600.8		High	High	High	0.0001305	0.0001418	1.87	88.14	K.ISEYVAQLR.R	[225-233]	Used	Used
[K].EMELVPTTPFVSLAR.[H]		FALSE	0.00235134	0.000987479	1	1	4	Q9SRL5	Q9SRL5 [68-82]		0	1689.89	0	2.88	0.941598	0	38043.7	13208.4		High	High	High	0.0001991	0.0004727	2.18	157.85	K.EMELVPTTPFVSLAR.H	[68-82]	Used	Used
P25858	Glyceraldehyde-3-phosphate dehydrogenase GAPC1, cytosolic OS=Arabidopsis thaliana OX=3702 GN=GAPC1 PE=1 SV=2	0	FALSE	73.042	57	14	87	2	338	36.9	7.12	230.62	14	12	2.153	0.952508	18.7	3.5523e+06	1.76213e+06	High	High	1		1.10635	-0.333044
Annotated Sequence	Modifications	Contaminant	Qvality PEP	Qvality q-value	# Protein Groups	# Proteins	# PSMs	Master Protein Accessions	Positions in Master Proteins	Modifications in Master Proteins	# Missed Cleavages	Theo. MH+ [Da]	# Razor Quan Results	Abundance Ratio: (F4) / (F3)	Abundance Ratio Adj. P-Value: (F4) / (F3)	Abundance Ratio Variability [%]: (F4) / (F3)	Abundances (Grouped): F4	Abundances (Grouped): F3	Quan Info	Found in Sample: [S4] F4: Sample	Found in Sample: [S3] F3: Sample	Confidence (by Search Engine): Sequest HT	Percolator q-Value (by Search Engine): Sequest HT	Percolator PEP (by Search Engine): Sequest HT	XCorr (by Search Engine): Sequest HT	Top Apex RT [min]	Sequence in Protein	Positions in Proteins	Quan Usage	Quan Ratio Usage
[R].LLEIPSPPPFADPTTSGNR.[I]		FALSE	0.000920641	0.000572698	1	1	5	Q9FVV1	Q9FVV1 [94-112]		0	2009.03	0	100	5.76991e-17		16855.7			High	Not Found	High	0.0001305	0.0001803	4.02	144.56	R.LLEIPSPPPFADPTTSGNR.I	[94-112]	Used	Used
Q9FX54	Glyceraldehyde-3-phosphate dehydrogenase GAPC2, cytosolic OS=Arabidopsis thaliana OX=3702 GN=GAPC2 PE=1 SV=1	0	FALSE	73.01	54	13	92	1	338	36.9	7.18	248.41	13	0	0.01	1.11183e-16			13535	High	High	1
Annotated Sequence	Modifications	Contaminant	Qvality PEP	Qvality q-value	# Protein Groups	# Proteins	# PSMs	Master Protein Accessions	Positions in Master Proteins	Modifications in Master Proteins	# Missed Cleavages	Theo. MH+ [Da]	# Razor Quan Results	Abundance Ratio: (F4) / (F3)	Abundance Ratio Adj. P-Value: (F4) / (F3)	Abundance Ratio Variability [%]: (F4) / (F3)	Abundances (Grouped): F4	Abundances (Grouped): F3	Quan Info	Found in Sample: [S4] F4: Sample	Found in Sample: [S3] F3: Sample	Confidence (by Search Engine): Sequest HT	Percolator q-Value (by Search Engine): Sequest HT	Percolator PEP (by Search Engine): Sequest HT	XCorr (by Search Engine): Sequest HT	Top Apex RT [min]	Sequence in Protein	Positions in Proteins	Quan Usage	Quan Ratio Usage
[K].AQIWDTAGQER.[FY]		FALSE	0.000164388	0.000572698	2	24	1	Q96283; O04486	Q96283 [63-73]; O04486 [63-73]		0	1274.61	0	4.304	0.69668	0	100269	23296.9	Shared	High	Peak Found	High	0.0001305	3.131e-05	3.48	84.57	K.AQIWDTAGQER.Y	[63-73]	Used	Used
[K].VVLIGDSGVGK.[S]		FALSE	0.00877662	0.00190722	1	6	1	O04486	O04486 [15-25]		0	1043.61	0	4.447	0.687981	0	39386.9	8857.94		High	Peak Found	High	0.0004264	0.001864	2.45	87.24	K.VVLIGDSGVGK.S	[15-25]	Used	Used
Q07187	Em-like protein GEA1 OS=Arabidopsis thaliana OX=3702 GN=EM1 PE=2 SV=1	0	FALSE	85.078	80	13	105	13	152	16.6	6.1	427.14	13	0	1.366	0.635938	62.54	2.10471e+06	2.50605e+06	High	High	1		0.449957	-0.135451
Annotated Sequence	Modifications	Contaminant	Qvality PEP	Qvality q-value	# Protein Groups	# Proteins	# PSMs	Master Protein Accessions	Positions in Master Proteins	Modifications in Master Proteins	# Missed Cleavages	Theo. MH+ [Da]	# Razor Quan Results	Abundance Ratio: (F4) / (F3)	Abundance Ratio Adj. P-Value: (F4) / (F3)	Abundance Ratio Variability [%]: (F4) / (F3)	Abundances (Grouped): F4	Abundances (Grouped): F3	Quan Info	Found in Sample: [S4] F4: Sample	Found in Sample: [S3] F3: Sample	Confidence (by Search Engine): Sequest HT	Percolator q-Value (by Search Engine): Sequest HT	Percolator PEP (by Search Engine): Sequest HT	XCorr (by Search Engine): Sequest HT	Top Apex RT [min]	Sequence in Protein	Positions in Proteins	Quan Usage	Quan Ratio Usage
[K].ANLLSGEDFEPALIPAK.[T]		FALSE	2.97828e-05	0.000572698	1	1	3	P29402	P29402 [205-221]		0	1784.94	0	100	5.76991e-17		45199.7			High	Not Found	High	0.0001305	5.526e-06	4.53	146.31	K.ANLLSGEDFEPALIPAK.T	[205-221]	Used	Used
[R].FQEGLECGGAYLK.[Y]	1xCarbamidomethyl [C7]	FALSE	0.000596622	0.000572698	1	2	5	P29402	P29402 [102-114]		0	1471.69	1	8.348	0.188388	0	79164.8	9483.55		High	High	High	0.0001305	0.0001161	2.98	101.42	R.FQEGLECGGAYLK.Y	[102-114]	Used	Used
[K].YLRPQEAGWTPQGFDSESPYSIMFGPDK.[C]		FALSE	1.92891e-05	0.000572698	1	1	8	P29402	P29402 [115-142]		0	3203.48	0	2.537	0.999906	0	21609.8	8518.73		High	High	High	0.0001305	3.545e-06	5.99	161.08	K.YLRPQEAGWTPQGFDSESPYSIMFGPDK.C	[115-142]	Used	Used
[K].NSDYEGVWK.[H]		FALSE	0.0134593	0.00190722	1	1	2	P29402	P29402 [48-56]		0	1097.49	0	3.492	0.874632	0	58007.5	16610.9		Peak Found	High	High	0.0004264	0.002917	2.62	85.64	K.NSDYEGVWK.H	[48-56]	Used	Used
[K].SEGHEDYGLLVSEK.[A]		FALSE	0.013184	0.00190722	1	1	1	P29402	P29402 [60-73]		0	1562.73	0	1.273	0.728957	0	36723.9	28845.5		High	Peak Found	High	0.0004264	0.002841	3.11	89.04	K.SEGHEDYGLLVSEK.A	[60-73]	Used	Used
Q9C5A9	ATP synthase subunit beta-3, mitochondrial OS=Arabidopsis thaliana OX=3702 GN=At5g08680 PE=1 SV=1	0	FALSE	60.746	33	13	50	12	559	59.8	6.49	150.72	13	1	2.987	0.92429	54.7	1.01441e+06	375256	High	High	1		1.5787	-0.475235
Annotated Sequence	Modifications	Contaminant	Qvality PEP	Qvality q-value	# Protein Groups	# Proteins	# PSMs	Master Protein Accessions	Positions in Master Proteins	Modifications in Master Proteins	# Missed Cleavages	Theo. MH+ [Da]	# Razor Quan Results	Abundance Ratio: (F4) / (F3)	Abundance Ratio Adj. P-Value: (F4) / (F3)	Abundance Ratio Variability [%]: (F4) / (F3)	Abundances (Grouped): F4	Abundances (Grouped): F3	Quan Info	Found in Sample: [S4] F4: Sample	Found in Sample: [S3] F3: Sample	Confidence (by Search Engine): Sequest HT	Percolator q-Value (by Search Engine): Sequest HT	Percolator PEP (by Search Engine): Sequest HT	XCorr (by Search Engine): Sequest HT	Top Apex RT [min]	Sequence in Protein	Positions in Proteins	Quan Usage	Quan Ratio Usage
[R].LTLEDPVTVEYITR.[Y]		FALSE	0.000180953	0.000572698	1	2	3	P30186	P30186 [97-110]		0	1648.88	0	2.344	0.997269	0	38689	16507.5		High	Peak Found	High	0.0001305	3.441e-05	3.5	138.36	R.LTLEDPVTVEYITR.Y	[97-110]	Used	Used
[R].ALLEVVESGGK.[N]		FALSE	0.00119763	0.000987479	1	2	3	P30186	P30186 [193-203]		0	1101.62	0	2.916	0.929909	0	83864.4	28761.4		High	High	High	0.0001991	0.000236	3.43	104.96	R.ALLEVVESGGK.N	[193-203]	Used	Used
[R].IPALYQTDPSGTFSAWK.[A]		FALSE	0.00509657	0.00166669	1	1	1	P30186	P30186 [143-159]		0	1881.94	0						No Quan Values	High	Not Found	High	0.0003407	0.001062	2.42		R.IPALYQTDPSGTFSAWK.A	[143-159]	Not Used	Not Used
P57751	UTP--glucose-1-phosphate uridylyltransferase 1 OS=Arabidopsis thaliana OX=3702 GN=UGP1 PE=2 SV=1	0	FALSE	60.678	34	13	50	6	470	51.9	6.01	166.6	13	7	2.329	0.986497	56.55	904221	354000	High	High	1		1.21971	-0.367169
Annotated Sequence	Modifications	Contaminant	Qvality PEP	Qvality q-value	# Protein Groups	# Proteins	# PSMs	Master Protein Accessions	Positions in Master Proteins	Modifications in Master Proteins	# Missed Cleavages	Theo. MH+ [Da]	# Razor Quan Results	Abundance Ratio: (F4) / (F3)	Abundance Ratio Adj. P-Value: (F4) / (F3)	Abundance Ratio Variability [%]: (F4) / (F3)	Abundances (Grouped): F4	Abundances (Grouped): F3	Quan Info	Found in Sample: [S4] F4: Sample	Found in Sample: [S3] F3: Sample	Confidence (by Search Engine): Sequest HT	Percolator q-Value (by Search Engine): Sequest HT	Percolator PEP (by Search Engine): Sequest HT	XCorr (by Search Engine): Sequest HT	Top Apex RT [min]	Sequence in Protein	Positions in Proteins	Quan Usage	Quan Ratio Usage
[R].SYDPNLIQEPTIYR.[L]		FALSE	0.000247604	0.000572698	1	1	3	O22683	O22683 [78-91]		0	1708.85	0	2.57	0.993138	0	34200.2	13307.9		High	Peak Found	High	0.0001305	4.735e-05	3.91	118.62	R.SYDPNLIQEPTIYR.L	[78-91]	Used	Used
P27323	Heat shock protein 90-1 OS=Arabidopsis thaliana OX=3702 GN=HSP90-1 PE=1 SV=3	0	FALSE	44.907	20	13	38	10	700	80.6	5.05	101.6	13	3	2.367	0.994322	20.68	603755	272037	High	High	1		1.24306	-0.374198
Annotated Sequence	Modifications	Contaminant	Qvality PEP	Qvality q-value	# Protein Groups	# Proteins	# PSMs	Master Protein Accessions	Positions in Master Proteins	Modifications in Master Proteins	# Missed Cleavages	Theo. MH+ [Da]	# Razor Quan Results	Abundance Ratio: (F4) / (F3)	Abundance Ratio Adj. P-Value: (F4) / (F3)	Abundance Ratio Variability [%]: (F4) / (F3)	Abundances (Grouped): F4	Abundances (Grouped): F3	Quan Info	Found in Sample: [S4] F4: Sample	Found in Sample: [S3] F3: Sample	Confidence (by Search Engine): Sequest HT	Percolator q-Value (by Search Engine): Sequest HT	Percolator PEP (by Search Engine): Sequest HT	XCorr (by Search Engine): Sequest HT	Top Apex RT [min]	Sequence in Protein	Positions in Proteins	Quan Usage	Quan Ratio Usage
[R].TDEGNKEHVSSAPSTTTTTTTR.[E]		FALSE	3.67116e-06	0.000572698	1	1	47	Q96270	Q96270 [143-164]		1	2321.09	0	1.777	0.99001	0	298504	167982		High	High	High	0.0001305	6.581e-07	3.87	41.5	R.TDEGNKEHVSSAPSTTTTTTTR.E	[143-164]	Used	Used
[R].TDEGNKEHVSSAPSTTTTTTTR.[E]	1xDeamidated [N5]	FALSE	4.24889e-05	0.000572698	1	1	8	Q96270	Q96270 [143-164]		1	2322.07	0	0.01	5.76991e-17			9479.35		Not Found	High	High	0.0001305	1.595e-05	4.25	45.57	R.TDEGNKEHVSSAPSTTTTTTTR.E	[143-164]	Used	Used
[K].TSGILGQTGEQVK.[Q]		FALSE	0.000516007	0.000572698	1	1	9	Q96270	Q96270 [113-125]		0	1317.7	0	2.004	0.960181	0	1.5679e+06	782277		High	High	High	0.0001305	0.0001001	3.9	73.38	K.TSGILGQTGEQVK.Q	[113-125]	Used	Used
[K].TSQAAQTTQER.[A]		FALSE	6.19498e-05	0.000572698	1	1	1	Q96270	Q96270 [62-72]		0	1220.59	0	3.038	0.925547	0	37780.9	12434.2		High	Peak Found	High	0.0001305	1.158e-05	4.09	24.25	K.TSQAAQTTQER.A	[62-72]	Used	Used
[K].TGEAMGTMGDKTQAAK.[D]		FALSE	6.388e-05	0.000572698	1	1	9	Q96270	Q96270 [22-37]		1	1596.74	0	0.039	9.47479e-05	0	9577.4	248271		Peak Found	High	High	0.0001305	1.195e-05	5.02	47.72	K.TGEAMGTMGDKTQAAK.D	[22-37]	Used	Used
[K].TGSYMSETGEAIK.[N]		FALSE	1.90368e-05	0.000572698	1	1	26	Q96270	Q96270 [80-92]		0	1373.63	0	5.163	0.515229	0	208978	40477.2		High	High	High	0.0001305	3.5e-06	4.67	75.74	K.TGSYMSETGEAIK.N	[80-92]	Used	Used
[K].DKTSQAAQTTQER.[A]		FALSE	1.43124e-05	0.000572698	1	1	35	Q96270	Q96270 [60-72]		1	1463.71	0	1.395	0.755566	0	18916.5	13564.1		High	High	High	0.0001305	2.621e-06	3.62	28.42	K.DKTSQAAQTTQER.A	[60-72]	Used	Used
[K].DKTQETAQSAQQK.[A]		FALSE	2.37072e-05	0.000572698	1	1	33	Q96270	Q96270 [38-50]		1	1462.71	0	2.974	0.932737	0	46294.1	15566.7		High	High	High	0.0001305	4.38e-06	5.18	23.45	K.DKTQETAQSAQQK.A	[38-50]	Used	Used
[K].DKTGSYMSETGEAIK.[N]		FALSE	4.86187e-06	0.000572698	1	1	13	Q96270	Q96270 [78-92]		1	1616.75	0	3.288	0.798762	0	344360	104719		High	High	High	0.0001305	8.751e-07	5.4	72.29	K.DKTGSYMSETGEAIK.N	[78-92]	Used	Used
[K].DKTGSYMSETGEAIKNK.[A]		FALSE	1.9717e-05	0.000572698	1	1	1	Q96270	Q96270 [78-94]		2	1858.89	0	0.01	5.76991e-17			74009.6		Not Found	High	High	0.0001305	3.629e-06	4.55	68.27	K.DKTGSYMSETGEAIKNK.A	[78-94]	Used	Used
[K].AHDAAEYTKETAEAGKEK.[T]		FALSE	3.67633e-05	0.000572698	1	1	1	Q96270	Q96270 [95-112]		2	1948.92	0	0.01	5.76991e-17			51908.6		Not Found	High	High	0.0001305	6.82e-06	4.56	52.12	K.AHDAAEYTKETAEAGKEK.T	[95-112]	Used	Used
[K].AHDAAEYTK.[E]		FALSE	0.00137394	0.000987479	1	1	10	Q96270	Q96270 [95-103]		0	1005.46	0	1.975	0.982566	0	122985	62273.9		Peak Found	High	High	0.0001991	0.0002716	2.7	29.17	K.AHDAAEYTK.E	[95-103]	Used	Used
[K].TQAAKDKTQETAQSAQQK.[A]		FALSE	0.00146504	0.000987479	1	1	6	Q96270	Q96270 [33-50]		2	1961.99	0						No Quan Values	Not Found	High	High	0.0001991	0.0002903	3.65		K.TQAAKDKTQETAQSAQQK.A	[33-50]	Not Used	Not Used
[K].DKTQETAQSAQQK.[A]	1xDeamidated [Q11]	FALSE	0.00204677	0.000987479	1	1	1	Q96270	Q96270 [38-50]		1	1463.7	0	77.487	3.09333e-07	0	30990.1	399.941		High	Peak Found	High	0.002084	0.02402	2.2	17.56	K.DKTQETAQSAQQK.A	[38-50]	Used	Used
[K].TGSYMSETGEAIKNK.[A]		FALSE	0.0046471	0.00166669	1	1	2	Q96270	Q96270 [80-94]		1	1615.76	0	0.01	5.76991e-17			69360.3		Not Found	High	High	0.0003407	0.0009661	2.27	67.82	K.TGSYMSETGEAIKNK.A	[80-94]	Used	Used
[K].NKAHDAAEYTK.[E]		FALSE	0.00587374	0.00166669	1	1	5	Q96270	Q96270 [93-103]		1	1247.6	0	0.01	5.76991e-17			21754.7		Not Found	High	High	0.0003948	0.001232	3.3	31.94	K.NKAHDAAEYTK.E	[93-103]	Used	Used
[K].QMAMGATDAVK.[H]		FALSE	0.012271	0.00190722	1	1	10	Q96270	Q96270 [126-136]		0	1122.53	0	1.717	0.993138	0	505067	294146		High	High	High	0.0004264	0.002642	2.76	63.88	K.QMAMGATDAVK.H	[126-136]	Used	Used
[K].TQETAQSAQQK.[A]		FALSE	0.027974	0.00400174	1	1	1	Q96270	Q96270 [40-50]		0	1219.59	0	100	5.76991e-17		10241.9			High	Not Found	High	0.0007949	0.006306	1.97	21.7	K.TQETAQSAQQK.A	[40-50]	Used	Used
[K].QMAMGATDAVK.[H]	1xOxidation [M4]	FALSE	0.04	0.00486181	1	1	1	Q96270	Q96270 [126-136]		0	1138.52	0	3.881	0.822921	0	45173.1	11639.6		High	Peak Found	High	0.001076	0.009086	2.12	45.61	K.QMAMGATDAVK.H	[126-136]	Used	Used
P53492	Actin-7 OS=Arabidopsis thaliana OX=3702 GN=ACT7 PE=1 SV=1	0	FALSE	66.774	48	13	67	6	377	41.7	5.49	202.74	13	8	2.461	0.999265	63.65	1.83394e+06	795936	High	High	1		1.29924	-0.391112
Annotated Sequence	Modifications	Contaminant	Qvality PEP	Qvality q-value	# Protein Groups	# Proteins	# PSMs	Master Protein Accessions	Positions in Master Proteins	Modifications in Master Proteins	# Missed Cleavages	Theo. MH+ [Da]	# Razor Quan Results	Abundance Ratio: (F4) / (F3)	Abundance Ratio Adj. P-Value: (F4) / (F3)	Abundance Ratio Variability [%]: (F4) / (F3)	Abundances (Grouped): F4	Abundances (Grouped): F3	Quan Info	Found in Sample: [S4] F4: Sample	Found in Sample: [S3] F3: Sample	Confidence (by Search Engine): Sequest HT	Percolator q-Value (by Search Engine): Sequest HT	Percolator PEP (by Search Engine): Sequest HT	XCorr (by Search Engine): Sequest HT	Top Apex RT [min]	Sequence in Protein	Positions in Proteins	Quan Usage	Quan Ratio Usage
[K].IENVPEMPLVVSDSAEAVEK.[T]		FALSE	1.28252e-05	0.000572698	2	2	3	Q9SF40; P49691	Q9SF40 [149-168]; P49691 [150-169]		0	2156.08	0	100	5.76991e-17		57982.4		Shared	High	Not Found	High	0.0001305	2.346e-06	4.53	138.73	K.IENVPEMPLVVSDSAEAVEK.T	[149-168]	Used	Used
[R].MSLLAEAQR.[V]		FALSE	0.00062255	0.000572698	1	1	2	Q9SF40	Q9SF40 [344-352]		0	1018.53	0	2.259	0.993138	0	45883.1	20313.6		High	Peak Found	High	0.0001305	0.0001213	3.03	93.41	R.MSLLAEAQR.V	[344-352]	Used	Used
[R].KGPLVVYGTEGSK.[I]		FALSE	0.00279911	0.00143413	1	1	2	Q9SF40	Q9SF40 [210-222]		1	1334.73	0						No Quan Values	High	Not Found	High	0.0002813	0.0005673	3.59		R.KGPLVVYGTEGSK.I	[210-222]	Not Used	Not Used
[K].NSIGIRPGK.[G]		FALSE	0.0159172	0.00268212	2	2	4	Q9SF40; P49691	Q9SF40 [190-198]; P49691 [191-199]		0	941.553	0	0.409	0.0521318	0	26308.9	64351.8	Shared	High	High	High	0.0005646	0.003473	2.47	45.09	K.NSIGIRPGK.G	[190-198]	Used	Used
[K].MVNADLAR.[I]		FALSE	0.0227431	0.00332708	2	2	1	Q9SF40; P49691	Q9SF40 [290-297]; P49691 [291-298]		0	889.456	0	1.439	0.91319	0	80647.6	56036.8	Shared	High	Peak Found	High	0.0006776	0.005065	2.84	60.59	K.MVNADLAR.I	[290-297]	Used	Used
[R].FVIWTK.[S]		FALSE	0.0350641	0.00462251	2	2	3	Q9SF40; P49691	Q9SF40 [255-260]; P49691 [256-261]		0	793.461	0	0.97	0.362763	0	16758.2	17281.6	Shared	High	Peak Found	High	0.0009067	0.007949	1.09	110.16	R.FVIWTK.S	[255-260]	Used	Used
Q42431	Oleosin 20.3 kDa OS=Arabidopsis thaliana OX=3702 GN=OL2 PE=2 SV=1	0	FALSE	116.607	43	12	578	12	191	20.3	7.58	2345.05	12	0	1.183	0.463251	41.79	3.18676e+07	2.5584e+07	High	High	1		0.24245	-0.0729847
Annotated Sequence	Modifications	Contaminant	Qvality PEP	Qvality q-value	# Protein Groups	# Proteins	# PSMs	Master Protein Accessions	Positions in Master Proteins	Modifications in Master Proteins	# Missed Cleavages	Theo. MH+ [Da]	# Razor Quan Results	Abundance Ratio: (F4) / (F3)	Abundance Ratio Adj. P-Value: (F4) / (F3)	Abundance Ratio Variability [%]: (F4) / (F3)	Abundances (Grouped): F4	Abundances (Grouped): F3	Quan Info	Found in Sample: [S4] F4: Sample	Found in Sample: [S3] F3: Sample	Confidence (by Search Engine): Sequest HT	Percolator q-Value (by Search Engine): Sequest HT	Percolator PEP (by Search Engine): Sequest HT	XCorr (by Search Engine): Sequest HT	Top Apex RT [min]	Sequence in Protein	Positions in Proteins	Quan Usage	Quan Ratio Usage
[R].TDRHFQFQSPYEGGR.[G]		FALSE	4.38135e-05	0.000572698	1	1	12	Q39165	Q39165 [10-24]		1	1824.84	0	0.069	0.00148762	0	65735.9	955825		High	High	High	0.0001305	8.17e-06	4.16	85.33	R.TDRHFQFQSPYEGGR.G	[10-24]	Used	Used
[R].HFQFQSPYEGGR.[G]		FALSE	6.61595e-05	0.000572698	1	1	51	Q39165	Q39165 [13-24]		0	1452.67	0	2.431	0.919939	0	8.74804e+06	3.59913e+06		High	High	High	0.0001305	1.238e-05	3.34	92.16	R.HFQFQSPYEGGR.G	[13-24]	Used	Used
[R].GQGQYEGDRGYGGGGYK.[S]		FALSE	2.66468e-06	0.000572698	1	1	16	Q39165	Q39165 [25-41]		1	1748.76	0	0.042	0.000149978	0	296400	7.01989e+06		High	High	High	0.0001305	4.769e-07	5.93	54.68	R.GQGQYEGDRGYGGGGYK.S	[25-41]	Used	Used
[R].MADAVGYAGQK.[G]		FALSE	0.000231965	0.000572698	1	1	19	Q39165	Q39165 [149-159]		0	1110.52	0	1.207	0.935609	0	1.09979e+07	9109129		High	High	High	0.0001305	4.431e-05	3.93	59.16	R.MADAVGYAGQK.G	[149-159]	Used	Used
[K].QYDISKPHDTTTK.[G]		FALSE	1.90368e-05	0.000572698	1	1	56	Q39165	Q39165 [176-188]		0	1533.75	0	1.469	0.988213	0	5.14007e+06	3.49792e+06		High	High	High	0.0001305	3.504e-06	3.61	46.77	K.QYDISKPHDTTTK.G	[176-188]	Used	Used
[K].QYDISKPHDTTTKGHETQGR.[T]		FALSE	1.10276e-06	0.000572698	1	1	8	Q39165	Q39165 [176-195]		1	2299.11	0	0.01	5.76991e-17			204379		Not Found	High	High	0.0001305	1.947e-07	4.73	48.51	K.QYDISKPHDTTTKGHETQGR.T	[176-195]	Used	Used
[R].RTVPEQLEYAKR.[R]		FALSE	5.13061e-05	0.000572698	1	1	1	Q39165	Q39165 [136-147]		2	1489.81	0	0.01	5.76991e-17			62011.9		Not Found	High	High	0.0001305	9.595e-06	4.39	64.76	R.RTVPEQLEYAKR.R	[136-147]	Used	Used
[R].RMADAVGYAGQK.[G]		FALSE	0.000186562	0.000572698	1	1	5	Q39165	Q39165 [148-159]		1	1266.63	0	0.362	0.292854	0	232960	644361		High	High	High	0.0001305	3.554e-05	4.27	55.92	R.RMADAVGYAGQK.G	[148-159]	Used	Used
[R].MADAVGYAGQK.[G]	1xOxidation [M1]	FALSE	0.00227797	0.000987479	1	1	93	Q39165	Q39165 [149-159]		0	1126.52	0	1.737	0.993138	0	1.4267e+06	821421		High	High	High	0.0001991	0.0004576	3.23	58.76	R.MADAVGYAGQK.G	[149-159]	Used	Used
[R].RTVPEQLEYAK.[R]		FALSE	0.00189815	0.000987479	1	1	5	Q39165	Q39165 [136-146]		1	1333.71	0	0.757	0.765034	0	1.10995e+06	1.46615e+06		High	High	High	0.0001991	0.000379	3.34	69.39	R.RTVPEQLEYAK.R	[136-146]	Used	Used
[R].VDRTDRHFQFQSPYEGGR.[G]		FALSE	0.00305413	0.00143413	1	1	1	Q39165	Q39165 [7-24]		2	2195.04	0	0.01	5.76991e-17			22058.6		Not Found	High	High	0.0002813	0.0006235	4.71	83.51	R.VDRTDRHFQFQSPYEGGR.G	[7-24]	Used	Used
[K].GKEMGQHVQNK.[A]		FALSE	0.00279911	0.00143413	1	1	109	Q39165	Q39165 [160-170]		1	1255.62	0	0.826	0.816512	0	105028	127129		High	High	High	0.0002813	0.0005692	3.65	25.47	K.GKEMGQHVQNK.A	[160-170]	Used	Used
[R].GQGQYEGDR.[G]		FALSE	0.0035527	0.00166669	1	1	6	Q39165	Q39165 [25-33]		0	1009.43	0	4.111	0.671646	0	808790	196729		High	High	High	0.0003407	0.0007291	2.87	29.44	R.GQGQYEGDR.G	[25-33]	Used	Used
[K].GKEMGQHVQNK.[A]	1xOxidation [M4]	FALSE	0.00458954	0.00166669	1	1	43	Q39165	Q39165 [160-170]		1	1271.62	0	6.373	0.388588	0	35587.9	5583.95		High	High	High	0.0003407	0.0009528	2.11	20.99	K.GKEMGQHVQNK.A	[160-170]	Used	Used
[R].RMADAVGYAGQK.[G]	1xOxidation [M2]	FALSE	0.00592533	0.00166669	1	1	3	Q39165	Q39165 [148-159]		1	1282.62	0	0.201	8.15022e-05	0	8492.45	42323.4		Peak Found	High	High	0.0003948	0.001243	2.55	55.68	R.RMADAVGYAGQK.G	[148-159]	Used	Used
[K].EMGQHVQNK.[A]		FALSE	0.0102471	0.00190722	1	1	21	Q39165	Q39165 [162-170]		0	1070.5	0	2.321	0.925353	0	534711	230368		High	High	High	0.0004264	0.002191	2.89	23.33	K.EMGQHVQNK.A	[162-170]	Used	Used
[K].EMGQHVQNK.[A]	1xOxidation [M2]	FALSE	0.0228689	0.00332708	1	1	15	Q39165	Q39165 [162-170]		0	1086.5	0	2.114	0.981677	0	56647	26800.4		High	High	High	0.0006776	0.005071	2.35	23.11	K.EMGQHVQNK.A	[162-170]	Used	Used
[R].TVPEQLEYAK.[R]		FALSE	0.0249935	0.00400174	1	1	11	Q39165	Q39165 [137-146]		0	1177.61	0	2.85	0.863002	0	7.04822e+06	2473009		High	High	High	0.0007949	0.005575	1.52	78.29	R.TVPEQLEYAK.R	[137-146]	Used	Used
Q42547	Catalase-3 OS=Arabidopsis thaliana OX=3702 GN=CAT3 PE=1 SV=3	0	FALSE	58.708	36	12	46	8	492	56.7	7.64	124.36	12	4	1.473	0.684165	68.05	676234	444455	High	High	1		0.558757	-0.168203
Annotated Sequence	Modifications	Contaminant	Qvality PEP	Qvality q-value	# Protein Groups	# Proteins	# PSMs	Master Protein Accessions	Positions in Master Proteins	Modifications in Master Proteins	# Missed Cleavages	Theo. MH+ [Da]	# Razor Quan Results	Abundance Ratio: (F4) / (F3)	Abundance Ratio Adj. P-Value: (F4) / (F3)	Abundance Ratio Variability [%]: (F4) / (F3)	Abundances (Grouped): F4	Abundances (Grouped): F3	Quan Info	Found in Sample: [S4] F4: Sample	Found in Sample: [S3] F3: Sample	Confidence (by Search Engine): Sequest HT	Percolator q-Value (by Search Engine): Sequest HT	Percolator PEP (by Search Engine): Sequest HT	XCorr (by Search Engine): Sequest HT	Top Apex RT [min]	Sequence in Protein	Positions in Proteins	Quan Usage	Quan Ratio Usage
[R].IVDANGQILDR.[A]	1xDeamidated [N5]	FALSE	0.00012483	0.000572698	1	1	3	O64743	O64743 [212-222]		0	1214.64	0	4.015	0.784258	0	64943.6	16174.6		High	Peak Found	High	0.0001305	2.364e-05	3.62	83.74	R.IVDANGQILDR.A	[212-222]	Used	Used
[R].ISESEIPFPHR.[N]		FALSE	0.00011538	0.000572698	1	1	2	O64743	O64743 [420-430]		0	1311.67	0	2.901	0.96464	0	20598.4	7099.58		High	Peak Found	High	0.0001305	2.179e-05	2.1	98.96	R.ISESEIPFPHR.N	[420-430]	Used	Used
[K].SDFVKEPIPVEGLEGLWER.[F]		FALSE	7.88337e-05	0.000572698	1	1	4	O64743	O64743 [381-399]		1	2200.13	0	10.004	0.143463	0	21652.1	2164.33		High	Peak Found	High	0.0001305	1.481e-05	2.05	163.64	K.SDFVKEPIPVEGLEGLWER.F	[381-399]	Used	Used
[R].HEQSVPTK.[I]		FALSE	0.0113745	0.00190722	1	1	1	O64743	O64743 [523-530]		0	925.474	0	100	5.76991e-17		8344.57			High	Not Found	High	0.0004264	0.002441	2.44	24.42	R.HEQSVPTK.I	[523-530]	Used	Used
F4JQG6	Vicilin-like seed storage protein At4g36700 OS=Arabidopsis thaliana OX=3702 GN=At4g36700 PE=3 SV=1	0	FALSE	85.042	26	12	110	12	522	59	5.53	401.55	12	0	1.514	0.720236	34.07	5.14586e+06	3.88034e+06	High	High	1		0.598365	-0.180126
Annotated Sequence	Modifications	Contaminant	Qvality PEP	Qvality q-value	# Protein Groups	# Proteins	# PSMs	Master Protein Accessions	Positions in Master Proteins	Modifications in Master Proteins	# Missed Cleavages	Theo. MH+ [Da]	# Razor Quan Results	Abundance Ratio: (F4) / (F3)	Abundance Ratio Adj. P-Value: (F4) / (F3)	Abundance Ratio Variability [%]: (F4) / (F3)	Abundances (Grouped): F4	Abundances (Grouped): F3	Quan Info	Found in Sample: [S4] F4: Sample	Found in Sample: [S3] F3: Sample	Confidence (by Search Engine): Sequest HT	Percolator q-Value (by Search Engine): Sequest HT	Percolator PEP (by Search Engine): Sequest HT	XCorr (by Search Engine): Sequest HT	Top Apex RT [min]	Sequence in Protein	Positions in Proteins	Quan Usage	Quan Ratio Usage
[R].HITIFSPEGR.[L]		FALSE	0.0275018	0.00400174	1	2	1	O81146	O81146 [12-21]		0	1156.61	0	1.642	0.853762	0	25132.2	15304.4		High	Peak Found	High	0.0007949	0.006168	2.57	90.3	R.HITIFSPEGR.L	[12-21]	Used	Used
Q8L831	Nudix hydrolase 3 OS=Arabidopsis thaliana OX=3702 GN=NUDT3 PE=1 SV=1	0	FALSE	44.29	19	12	33	12	772	86.8	5.44	88.14	12	0	1.637	0.790545	40.72	586030	426381	High	High	1		0.711054	-0.214049
Annotated Sequence	Modifications	Contaminant	Qvality PEP	Qvality q-value	# Protein Groups	# Proteins	# PSMs	Master Protein Accessions	Positions in Master Proteins	Modifications in Master Proteins	# Missed Cleavages	Theo. MH+ [Da]	# Razor Quan Results	Abundance Ratio: (F4) / (F3)	Abundance Ratio Adj. P-Value: (F4) / (F3)	Abundance Ratio Variability [%]: (F4) / (F3)	Abundances (Grouped): F4	Abundances (Grouped): F3	Quan Info	Found in Sample: [S4] F4: Sample	Found in Sample: [S3] F3: Sample	Confidence (by Search Engine): Sequest HT	Percolator q-Value (by Search Engine): Sequest HT	Percolator PEP (by Search Engine): Sequest HT	XCorr (by Search Engine): Sequest HT	Top Apex RT [min]	Sequence in Protein	Positions in Proteins	Quan Usage	Quan Ratio Usage
[K].SNYNFEKPFLYLAR.[K]		FALSE	0.000106175	0.000572698	1	3	3	P41916	P41916 [156-169]		0	1761.9	0	0.01	5.76991e-17			13610.6		Not Found	High	High	0.0001305	2.008e-05	2.83	141.94	K.SNYNFEKPFLYLAR.K	[156-169]	Used	Used
[K].NLQYYEISAK.[S]		FALSE	0.00616444	0.00166669	1	3	2	P41916	P41916 [146-155]		0	1228.62	0	2.351	0.998782	0	60527	25749.5		High	Peak Found	High	0.0003948	0.001294	2.95	94.75	K.NLQYYEISAK.S	[146-155]	Used	Used
P55737	Heat shock protein 90-2 OS=Arabidopsis thaliana OX=3702 GN=HSP90-2 PE=1 SV=1	0	FALSE	43.885	17	12	49	9	699	80	5.05	136.05	12	0	2.348	0.990842	23.87	398497	129623	High	High	1		1.23143	-0.370698
Annotated Sequence	Modifications	Contaminant	Qvality PEP	Qvality q-value	# Protein Groups	# Proteins	# PSMs	Master Protein Accessions	Positions in Master Proteins	Modifications in Master Proteins	# Missed Cleavages	Theo. MH+ [Da]	# Razor Quan Results	Abundance Ratio: (F4) / (F3)	Abundance Ratio Adj. P-Value: (F4) / (F3)	Abundance Ratio Variability [%]: (F4) / (F3)	Abundances (Grouped): F4	Abundances (Grouped): F3	Quan Info	Found in Sample: [S4] F4: Sample	Found in Sample: [S3] F3: Sample	Confidence (by Search Engine): Sequest HT	Percolator q-Value (by Search Engine): Sequest HT	Percolator PEP (by Search Engine): Sequest HT	XCorr (by Search Engine): Sequest HT	Top Apex RT [min]	Sequence in Protein	Positions in Proteins	Quan Usage	Quan Ratio Usage
[K].RPDQPFPTGQGGDGVGLLR.[W]		FALSE	3.30896e-05	0.000572698	1	1	1	Q93Y22	Q93Y22 [359-377]		0	1967.01	0	2.442	0.993138	0	50950.9	20865.2		High	Peak Found	High	0.0001305	6.144e-06	4.73	112.33	K.RPDQPFPTGQGGDGVGLLR.W	[359-377]	Used	Used
P25696	Bifunctional enolase 2/transcriptional activator OS=Arabidopsis thaliana OX=3702 GN=ENO2 PE=1 SV=1	0	FALSE	58.847	41	12	49	12	444	47.7	5.77	134.97	12	0	2.483	0.999265	45.96	1.19035e+06	426410	High	High	1		1.31208	-0.394977
Annotated Sequence	Modifications	Contaminant	Qvality PEP	Qvality q-value	# Protein Groups	# Proteins	# PSMs	Master Protein Accessions	Positions in Master Proteins	Modifications in Master Proteins	# Missed Cleavages	Theo. MH+ [Da]	# Razor Quan Results	Abundance Ratio: (F4) / (F3)	Abundance Ratio Adj. P-Value: (F4) / (F3)	Abundance Ratio Variability [%]: (F4) / (F3)	Abundances (Grouped): F4	Abundances (Grouped): F3	Quan Info	Found in Sample: [S4] F4: Sample	Found in Sample: [S3] F3: Sample	Confidence (by Search Engine): Sequest HT	Percolator q-Value (by Search Engine): Sequest HT	Percolator PEP (by Search Engine): Sequest HT	XCorr (by Search Engine): Sequest HT	Top Apex RT [min]	Sequence in Protein	Positions in Proteins	Quan Usage	Quan Ratio Usage
[K].TAGGLLLTETTK.[E]		FALSE	9.94285e-05	0.000572698	1	1	1	O65282	O65282 [178-189]		0	1204.68	0	5.271	0.536508	0	136704	25937.4		High	Peak Found	High	0.0001305	1.874e-05	3.65	96.69	K.TAGGLLLTETTK.E	[178-189]	Used	Used
[K].EKPSIGTVIAVGPGSLDEEGK.[I]		FALSE	0.000364186	0.000572698	1	1	1	O65282	O65282 [190-210]		0	2083.09	0	8.817	0.180816	0	65371.3	7414.06		High	Peak Found	High	0.0001305	7.02e-05	3.82	117.67	K.EKPSIGTVIAVGPGSLDEEGK.I	[190-210]	Used	Used
[K].YAGTEVEFNDVK.[H]		FALSE	0.000579092	0.000572698	1	1	1	O65282	O65282 [128-139]		0	1371.64	0	3.969	0.796414	0	53508.1	13480.3		High	Peak Found	High	0.0001305	0.0001125	3.86	90.96	K.YAGTEVEFNDVK.H	[128-139]	Used	Used
O81270	Peroxygenase 1 OS=Arabidopsis thaliana OX=3702 GN=PXG1 PE=1 SV=1	0	FALSE	63.954	40	11	65	11	245	28	6.23	150.99	11	0	5.309	0.433769	55.33	2.48207e+06	1.08393e+06	High	High	1		2.40844	-0.725013
Annotated Sequence	Modifications	Contaminant	Qvality PEP	Qvality q-value	# Protein Groups	# Proteins	# PSMs	Master Protein Accessions	Positions in Master Proteins	Modifications in Master Proteins	# Missed Cleavages	Theo. MH+ [Da]	# Razor Quan Results	Abundance Ratio: (F4) / (F3)	Abundance Ratio Adj. P-Value: (F4) / (F3)	Abundance Ratio Variability [%]: (F4) / (F3)	Abundances (Grouped): F4	Abundances (Grouped): F3	Quan Info	Found in Sample: [S4] F4: Sample	Found in Sample: [S3] F3: Sample	Confidence (by Search Engine): Sequest HT	Percolator q-Value (by Search Engine): Sequest HT	Percolator PEP (by Search Engine): Sequest HT	XCorr (by Search Engine): Sequest HT	Top Apex RT [min]	Sequence in Protein	Positions in Proteins	Quan Usage	Quan Ratio Usage
[R].EQQDDYAVQSFER.[G]		FALSE	0.000101185	0.000572698	1	1	4	Q8S4Y1	Q8S4Y1 [182-194]		0	1614.7	0	2.285	0.999906	0	61662.4	26985.8		High	High	High	0.0001305	1.911e-05	3.95	92.79	R.EQQDDYAVQSFER.G	[182-194]	Used	Used
[K].IKGYGDAAQEPEFFTTAPALAIPK.[A]		FALSE	0.00128817	0.000987479	1	1	2	Q8S4Y1	Q8S4Y1 [286-309]		1	2535.31	0	0.827	0.218868	0	21299.4	25739.8		High	High	High	0.0001991	0.0002543	3.17	145.67	K.IKGYGDAAQEPEFFTTAPALAIPK.A	[286-309]	Used	Used
[K].GYGDAAQEPEFFTTAPALAIPK.[A]		FALSE	0.00340008	0.00143413	1	1	2	Q8S4Y1	Q8S4Y1 [288-309]		0	2294.13	0						No Quan Values	High	Not Found	High	0.0002813	0.0006971	4.13		K.GYGDAAQEPEFFTTAPALAIPK.A	[288-309]	Not Used	Not Used
[K].LLGIAPEK.[V]		FALSE	0.0224937	0.00332708	1	1	1	Q8S4Y1	Q8S4Y1 [340-347]		0	840.519	0	3.905	0.816512	0	33608.3	8606.98		High	Peak Found	High	0.0006776	0.004989	2.26	86.32	K.LLGIAPEK.V	[340-347]	Used	Used
[R].TPMGGFLGSLSSLPATK.[L]		FALSE	0.028294	0.00400174	1	1	1	Q8S4Y1	Q8S4Y1 [21-37]		0	1663.87	0	1.05	0.446709	0	24565.4	23406.2		Peak Found	High	High	0.0007949	0.006372	1.5	153.81	R.TPMGGFLGSLSSLPATK.L	[21-37]	Used	Used
Q9LF98	Fructose-bisphosphate aldolase 8, cytosolic OS=Arabidopsis thaliana OX=3702 GN=FBA8 PE=1 SV=1	0	FALSE	49.759	39	11	38	8	358	38.5	6.46	117.27	11	3	3.9	0.755064	49.04	1.40934e+06	404795	High	High	1		1.96347	-0.591065
Annotated Sequence	Modifications	Contaminant	Qvality PEP	Qvality q-value	# Protein Groups	# Proteins	# PSMs	Master Protein Accessions	Positions in Master Proteins	Modifications in Master Proteins	# Missed Cleavages	Theo. MH+ [Da]	# Razor Quan Results	Abundance Ratio: (F4) / (F3)	Abundance Ratio Adj. P-Value: (F4) / (F3)	Abundance Ratio Variability [%]: (F4) / (F3)	Abundances (Grouped): F4	Abundances (Grouped): F3	Quan Info	Found in Sample: [S4] F4: Sample	Found in Sample: [S3] F3: Sample	Confidence (by Search Engine): Sequest HT	Percolator q-Value (by Search Engine): Sequest HT	Percolator PEP (by Search Engine): Sequest HT	XCorr (by Search Engine): Sequest HT	Top Apex RT [min]	Sequence in Protein	Positions in Proteins	Quan Usage	Quan Ratio Usage
[R].NAELANLLVDPEFAK.[E]		FALSE	0.00112666	0.000987479	1	1	1	Q9FWA3	Q9FWA3 [392-406]		0	1643.86	0	100	5.76991e-17		15878.5			High	Not Found	High	0.0001991	0.0002213	2.95	153.83	R.NAELANLLVDPEFAK.E	[392-406]	Used	Used
[K].GFPISVYNR.[T]		FALSE	0.00869348	0.00190722	2	3	1	Q9SH69; Q9FWA3	Q9SH69 [29-37]; Q9FWA3 [28-36]		0	1052.55	0	1.559	0.837035	0	32116.1	20599.8	Shared	High	Peak Found	High	0.0004264	0.001847	1.59	108.35	K.GFPISVYNR.T	[28-36]	Used	Used
Q9LZC3	Malate synthase OS=Arabidopsis thaliana OX=3702 GN=MLS PE=1 SV=1	0	FALSE	39.569	20	11	38	11	562	63.8	7.94	99.15	11	0	1.558	0.755064	32.57	565004	381253	High	High	1		0.639695	-0.192567
Annotated Sequence	Modifications	Contaminant	Qvality PEP	Qvality q-value	# Protein Groups	# Proteins	# PSMs	Master Protein Accessions	Positions in Master Proteins	Modifications in Master Proteins	# Missed Cleavages	Theo. MH+ [Da]	# Razor Quan Results	Abundance Ratio: (F4) / (F3)	Abundance Ratio Adj. P-Value: (F4) / (F3)	Abundance Ratio Variability [%]: (F4) / (F3)	Abundances (Grouped): F4	Abundances (Grouped): F3	Quan Info	Found in Sample: [S4] F4: Sample	Found in Sample: [S3] F3: Sample	Confidence (by Search Engine): Sequest HT	Percolator q-Value (by Search Engine): Sequest HT	Percolator PEP (by Search Engine): Sequest HT	XCorr (by Search Engine): Sequest HT	Top Apex RT [min]	Sequence in Protein	Positions in Proteins	Quan Usage	Quan Ratio Usage
[K].SENLFESQGGPIILSQIENEYGR.[Q]		FALSE	2.18108e-05	0.000572698	1	1	6	Q9SCV9	Q9SCV9 [170-192]		0	2580.26	0	1.771	0.902941	0	9087.23	5130.1		High	High	High	0.0001305	4.017e-06	3.14	172.8	K.SENLFESQGGPIILSQIENEYGR.Q	[170-192]	Used	Used
[K].ALVSADPVVTSIGNK.[Q]		FALSE	5.92929e-05	0.000572698	1	1	3	Q9SCV9	Q9SCV9 [351-365]		0	1470.82	0	1.363	0.799193	0	48445.7	35545.6		High	High	High	0.0001305	1.11e-05	4.04	105.45	K.ALVSADPVVTSIGNK.Q	[351-365]	Used	Used
[K].VGVQTSQMEMLPTDTK.[N]		FALSE	3.61239e-05	0.000572698	1	1	6	Q9SCV9	Q9SCV9 [423-438]		0	1764.85	0						No Quan Values	High	High	High	0.0001305	6.718e-06	4.86		K.VGVQTSQMEMLPTDTK.N	[423-438]	Not Used	Not Used
[R].STPDMWEDLIQK.[A]		FALSE	0.0021808	0.000987479	1	1	2	Q9SCV9	Q9SCV9 [59-70]		0	1462.69	0	2.665	0.964628	0	58947.4	22117.2		High	Peak Found	High	0.0001991	0.0004382	2.65	143.09	R.STPDMWEDLIQK.A	[59-70]	Used	Used
[K].GQIWVNGESIGR.[Y]	1xDeamidated [N6]	FALSE	0.00291224	0.00143413	1	1	5	Q9SCV9	Q9SCV9 [652-663]		0	1316.66	0						No Quan Values	High	High	High	0.0002813	0.0005917	2.63	104.41	K.GQIWVNGESIGR.Y	[652-663]	Not Used	Not Used
[K].WTYQVGLK.[G]		FALSE	0.0542774	0.00545717	1	1	1	Q9SCV9	Q9SCV9 [589-596]		0	994.536	0	100	5.76991e-17		27118.6			High	Not Found	High	0.001308	0.0124	1.66	103.87	K.WTYQVGLK.G	[589-596]	Used	Used
Q56WD9	3-ketoacyl-CoA thiolase 2, peroxisomal OS=Arabidopsis thaliana OX=3702 GN=PED1 PE=1 SV=2	0	FALSE	58.006	35	11	46	11	462	48.5	8.34	126.47	11	0	1.767	0.868857	69.56	582648	302357	High	High	1		0.821302	-0.247237
Annotated Sequence	Modifications	Contaminant	Qvality PEP	Qvality q-value	# Protein Groups	# Proteins	# PSMs	Master Protein Accessions	Positions in Master Proteins	Modifications in Master Proteins	# Missed Cleavages	Theo. MH+ [Da]	# Razor Quan Results	Abundance Ratio: (F4) / (F3)	Abundance Ratio Adj. P-Value: (F4) / (F3)	Abundance Ratio Variability [%]: (F4) / (F3)	Abundances (Grouped): F4	Abundances (Grouped): F3	Quan Info	Found in Sample: [S4] F4: Sample	Found in Sample: [S3] F3: Sample	Confidence (by Search Engine): Sequest HT	Percolator q-Value (by Search Engine): Sequest HT	Percolator PEP (by Search Engine): Sequest HT	XCorr (by Search Engine): Sequest HT	Top Apex RT [min]	Sequence in Protein	Positions in Proteins	Quan Usage	Quan Ratio Usage
[R].STDVLHSLGAYISSPATPK.[L]		FALSE	7.15896e-05	0.000572698	1	1	9	O49326	O49326 [131-149]		0	1944.01	0	1.855	0.979289	0	133379	71892.9		High	High	High	0.0001305	1.343e-05	5.05	138.3	R.STDVLHSLGAYISSPATPK.L	[131-149]	Used	Used
[R].KVYVGQGEDGIAFVK.[F]		FALSE	4.32409e-05	0.000572698	1	1	5	O49326	O49326 [26-40]		1	1609.86	0	100	5.76991e-17		43507.6			High	Not Found	High	0.0001305	2.709e-05	4.97	102.45	R.KVYVGQGEDGIAFVK.F	[26-40]	Used	Used
[K].IFSFGGELTPNQPIDK.[H]		FALSE	2.9009e-05	0.000572698	1	1	5	O49326	O49326 [179-194]		0	1762.9	0	4.501	0.611142	0	207969	46207.5		High	High	High	0.0001305	5.377e-06	4.9	134.57	K.IFSFGGELTPNQPIDK.H	[179-194]	Used	Used
[K].LDKLGEEEETPSIR.[G]		FALSE	9.89942e-05	0.000572698	1	1	11	O49326	O49326 [418-431]		1	1615.82	0	1.684	0.996484	0	232611	138132		High	High	High	0.0001305	1.868e-05	3.1	79.29	K.LDKLGEEEETPSIR.G	[418-431]	Used	Used
[R].GGAGLEVVQGK.[V]		FALSE	0.000959644	0.000572698	1	4	2	O49326	O49326 [321-331]		0	1014.56	0	1.615	0.999906	0	264176	163539		High	High	High	0.0001305	0.000188	3.63	65.96	R.GGAGLEVVQGK.V	[321-331]	Used	Used
[R].GGEIGDVWDDGAYDGVRK.[V]		FALSE	0.00020895	0.000572698	1	1	4	O49326	O49326 [9-26]		1	1908.87	0	0.777	0.327606	0	31157.1	40098.5		Peak Found	High	High	0.0001305	3.997e-05	2.83	111.03	R.GGEIGDVWDDGAYDGVRK.V	[9-26]	Used	Used
[R].GGEIGDVWDDGAYDGVR.[K]		FALSE	3.68731e-06	0.000572698	1	1	3	O49326	O49326 [9-25]		0	1780.78	0	3.4	0.78029	0	265594	78124.2		Peak Found	High	High	0.0001305	6.605e-07	4.88	123.77	R.GGEIGDVWDDGAYDGVR.K	[9-25]	Used	Used
[R].GWSASTTGTIDGK.[K]		FALSE	0.000196583	0.000572698	1	1	13	O49326	O49326 [432-444]		0	1280.61	0	2.726	0.946806	0	83573.2	30661.2		High	High	High	0.0001305	3.745e-05	3.57	78.59	R.GWSASTTGTIDGK.K	[432-444]	Used	Used
[K].TLDAYNIVDHK.[W]		FALSE	0.000354865	0.000572698	1	1	6	O49326	O49326 [296-306]		0	1288.65	0	4.61	0.596373	0	196212	42565		High	High	High	0.0001305	6.826e-05	3.2	91.28	K.TLDAYNIVDHK.W	[296-306]	Used	Used
[K].TLLGAEEFEVDPDDYIVYVEGYHEK.[V]		FALSE	0.000347276	0.000572698	1	1	2	O49326	O49326 [59-83]		0	2930.36	0	1.228	0.672586	0	9575.08	7797.74		High	Peak Found	High	0.0001305	6.675e-05	3.34	172.2	K.TLLGAEEFEVDPDDYIVYVEGYHEK.V	[59-83]	Used	Used
[R].MVSIGSSLYVFGGR.[D]		FALSE	0.00028951	0.000572698	1	1	1	O49326	O49326 [225-238]		0	1472.76	0						No Quan Values	Not Found	High	High	0.0001305	5.561e-05	2.33		R.MVSIGSSLYVFGGR.D	[225-238]	Not Used	Not Used
[R].LKTLDAYNIVDHK.[W]		FALSE	0.00016583	0.000572698	1	1	2	O49326	O49326 [294-306]		1	1529.83	0	0.01	5.76991e-17			23182.2		Not Found	High	High	0.0001305	3.152e-05	3.67	94.51	R.LKTLDAYNIVDHK.W	[294-306]	Used	Used
[K].LGEEEETPSIR.[G]		FALSE	0.000290769	0.000572698	1	1	6	O49326	O49326 [421-431]		0	1259.61	0	2.082	0.945037	0	255619	122784		High	High	High	0.0001305	5.578e-05	3.99	69.98	K.LGEEEETPSIR.G	[421-431]	Used	Used
[K].VYVGQGEDGIAFVK.[F]		FALSE	0.000177048	0.000572698	1	1	3	O49326	O49326 [27-40]		0	1481.76	0	3.715	0.765034	0	143932	38746.2		High	High	High	0.0001305	3.367e-05	3.91	114.64	K.VYVGQGEDGIAFVK.F	[27-40]	Used	Used
[K].WVQCSTPGGSCSVR.[G]	2xCarbamidomethyl [C4; C11]	FALSE	4.97553e-05	0.000572698	1	1	8	O49326	O49326 [307-320]		0	1580.69	0	1.874	0.929909	0	39489.8	21072.7		High	High	High	0.0001305	9.306e-06	4.21	67.35	K.WVQCSTPGGSCSVR.G	[307-320]	Used	Used
[K].FEYVNGSQEVVGDER.[G]	1xDeamidated [N5]	FALSE	1.65143e-06	0.000572698	1	1	5	O49326	O49326 [41-55]		0	1728.77	0	4.248	0.647892	0	383749	90338.1		High	High	High	0.0001305	2.935e-07	5.07	95.87	K.FEYVNGSQEVVGDER.G	[41-55]	Used	Used
[K].AHEGPGQLSGGTFALDTETLK.[W]		FALSE	7.42868e-07	0.000572698	1	1	7	O49326	O49326 [394-414]		0	2129.05	0	3.944	0.696831	0	196483	49820.3		High	High	High	0.0001305	1.302e-07	4.32	116.87	K.AHEGPGQLSGGTFALDTETLK.W	[394-414]	Used	Used
[R].KYNGFYSFDTTK.[N]	1xDeamidated [N3]	FALSE	0.0019362	0.000987479	1	1	5	O49326	O49326 [243-254]		1	1471.67	0	5.409	0.598137	0	25907	4789.52		High	Peak Found	High	0.0001991	0.000387	2.44	101.42	R.KYNGFYSFDTTK.N	[243-254]	Used	Used
[K].HLYVFDLETR.[T]		FALSE	0.00616444	0.00166669	1	3	5	O49326	O49326 [195-204]		0	1292.66	0	1.321	0.892812	0	81859.2	61982.9		High	Peak Found	High	0.0003948	0.001291	1.89	124.32	K.HLYVFDLETR.T	[195-204]	Used	Used
[R].SVFASAVVGK.[H]		FALSE	0.0041244	0.00166669	1	1	4	O49326	O49326 [370-379]		0	964.546	0	1.535	0.945434	0	99285	64689.2		High	High	High	0.0003407	0.000854	2.19	87.78	R.SVFASAVVGK.H	[370-379]	Used	Used
[K].AHEGPGQLSGGTFALDTETLKWEK.[L]		FALSE	0.0040087	0.00166669	1	1	2	O49326	O49326 [394-417]		1	2572.27	0	0.01	5.76991e-17			12135.7		Not Found	High	High	0.0004264	0.001641	2.23	128.63	K.AHEGPGQLSGGTFALDTETLKWEK.L	[394-417]	Used	Used
[K].LLTPVEQGPTPR.[S]		FALSE	0.00738144	0.00166669	1	1	5	O49326	O49326 [259-270]		0	1307.73	0	1.245	0.941871	0	372579	299320		High	High	High	0.0003948	0.001561	2.32	82.27	K.LLTPVEQGPTPR.S	[259-270]	Used	Used
[R].KYNGFYSFDTTKNEWK.[L]	1xDeamidated [N]	FALSE	0.0236407	0.00369107	1	1	3	O49326	O49326 [243-258]		2	2028.93	0	0.01	5.76991e-17			22521.4		Not Found	High	High	0.0007407	0.005269	3.05	115.72	R.KYNGFYSFDTTKNEWK.L	[243-258]	Used	Used
[K].EIISTLTFK.[T]		FALSE	0.0346524	0.00462251	1	1	1	O49326	O49326 [91-99]		0	1051.6	0	0.244	0.00359651	0	15133.7	62110.7		Peak Found	High	High	0.0009067	0.007867	1.88	120	K.EIISTLTFK.T	[91-99]	Used	Used
[K].TSPPFGIVSGTK.[F]		FALSE	0.0395185	0.00486181	1	1	5	O49326	O49326 [105-116]		0	1190.64	0	1.952	0.96464	0	207568	106327		High	High	High	0.001076	0.009006	1.64	101.19	K.TSPPFGIVSGTK.F	[105-116]	Used	Used
[K].GLVMFGGK.[A]		FALSE	0.0502919	0.00519493	1	1	3	O49326	O49326 [446-453]		0	808.439	0	1.872	0.941367	0	58640.6	31325.3		High	High	High	0.001256	0.01151	1.52	103.49	K.GLVMFGGK.A	[446-453]	Used	Used
[K].KGLVMFGGK.[A]		FALSE	0.133204	0.00875015	1	1	1	O49326	O49326 [445-453]		1	936.534	0	100	5.76991e-17		29681			High	Not Found	High	0.00235	0.02979	1.87	87.11	K.KGLVMFGGK.A	[445-453]	Used	Used
Q96520	Peroxidase 12 OS=Arabidopsis thaliana OX=3702 GN=PER12 PE=1 SV=1	0	FALSE	58.282	31	11	63	11	358	39.5	8.28	186.4	11	0	1.878	0.888502	71.75	1.25014e+06	778053	High	High	1		0.909197	-0.273696
Annotated Sequence	Modifications	Contaminant	Qvality PEP	Qvality q-value	# Protein Groups	# Proteins	# PSMs	Master Protein Accessions	Positions in Master Proteins	Modifications in Master Proteins	# Missed Cleavages	Theo. MH+ [Da]	# Razor Quan Results	Abundance Ratio: (F4) / (F3)	Abundance Ratio Adj. P-Value: (F4) / (F3)	Abundance Ratio Variability [%]: (F4) / (F3)	Abundances (Grouped): F4	Abundances (Grouped): F3	Quan Info	Found in Sample: [S4] F4: Sample	Found in Sample: [S3] F3: Sample	Confidence (by Search Engine): Sequest HT	Percolator q-Value (by Search Engine): Sequest HT	Percolator PEP (by Search Engine): Sequest HT	XCorr (by Search Engine): Sequest HT	Top Apex RT [min]	Sequence in Protein	Positions in Proteins	Quan Usage	Quan Ratio Usage
[R].SDDTVSMIEAYLR.[A]		FALSE	0.000138035	0.000572698	1	1	3	Q42560	Q42560 [330-342]		0	1499.7	0	7.084	0.338761	0	25262.8	3566.24		High	High	High	0.0001305	2.616e-05	2.9	163.79	R.SDDTVSMIEAYLR.A	[330-342]	Used	Used
[K].ALEKPDGGEFGNYYSLPALNDPR.[I]		FALSE	0.000293302	0.000572698	1	1	3	Q42560	Q42560 [13-35]		0	2523.22	0	2.092	0.99001	0	110204	52675.7		High	High	High	0.0001305	5.634e-05	3.53	133.4	K.ALEKPDGGEFGNYYSLPALNDPR.I	[13-35]	Used	Used
[K].EVAEVVQSSVLPDMFK.[A]		FALSE	2.35e-05	0.000572698	1	1	2	Q42560	Q42560 [599-614]		0	1777.9	0						No Quan Values	High	Not Found	High	0.0001305	4.348e-06	4.1		K.EVAEVVQSSVLPDMFK.A	[599-614]	Not Used	Not Used
[K].LSVFDAAMK.[Y]		FALSE	0.00153095	0.000987479	1	1	3	Q42560	Q42560 [755-763]		0	981.507	0	1.999	0.940966	0	35330.3	17676.7		High	Peak Found	High	0.0001991	0.0003032	2.3	113.63	K.LSVFDAAMK.Y	[755-763]	Used	Used
[K].TSLAPGSGVVTK.[Y]		FALSE	0.00218946	0.000987479	2	2	2	Q9SIB9; Q42560	Q9SIB9 [565-576]; Q42560 [473-484]		0	1116.63	0	1.901	0.966045	0	160302	84303.4	Shared	Peak Found	High	High	0.0001991	0.0004396	2.85	65.66	K.TSLAPGSGVVTK.Y	[473-484]	Used	Used
[K].ILDWENTSPK.[Q]		FALSE	0.00124718	0.000987479	1	1	3	Q42560	Q42560 [67-76]		0	1202.61	0	1.597	0.913389	0	63282.2	39627.7		High	High	High	0.0001991	0.000246	3.3	99.11	K.ILDWENTSPK.Q	[67-76]	Used	Used
[R].ATIANMSPEYGATMGFFPVDHVTLQYLR.[L]		FALSE	0.0425142	0.00486181	1	1	1	Q42560	Q42560 [298-325]		0	3129.52	0	0.294	0.00446665	0	5877.45	20023.4		Peak Found	High	High	0.001076	0.009689	2.72	174.79	R.ATIANMSPEYGATMGFFPVDHVTLQYLR.L	[298-325]	Used	Used
[K].GPMLLGVK.[A]		FALSE	0.0646512	0.00573653	1	1	1	Q42560	Q42560 [791-798]		0	814.486	0	2.629	0.995854	0	22428.5	8531.82		High	Peak Found	High	0.001478	0.01473	1.75	96.44	K.GPMLLGVK.A	[791-798]	Used	Used
[K].INPLVPVDLVIDHSVQVDVAR.[S]		FALSE	0.135883	0.00875015	2	2	1	Q9SIB9; Q42560	Q9SIB9 [210-230]; Q42560 [118-138]		0	2298.28	0	22.32	0.00422201	0	24595.8	1101.94	Shared	High	Peak Found	High	0.00235	0.03026	2.02	168.7	K.INPLVPVDLVIDHSVQVDVAR.S	[118-138]	Used	Used
O23255	Adenosylhomocysteinase 1 OS=Arabidopsis thaliana OX=3702 GN=SAHH1 PE=1 SV=1	0	FALSE	33.296	24	11	36	11	485	53.3	5.97	87.44	11	0	2.955	0.926985	81.07	780671	280219	High	High	1		1.56316	-0.470557
Annotated Sequence	Modifications	Contaminant	Qvality PEP	Qvality q-value	# Protein Groups	# Proteins	# PSMs	Master Protein Accessions	Positions in Master Proteins	Modifications in Master Proteins	# Missed Cleavages	Theo. MH+ [Da]	# Razor Quan Results	Abundance Ratio: (F4) / (F3)	Abundance Ratio Adj. P-Value: (F4) / (F3)	Abundance Ratio Variability [%]: (F4) / (F3)	Abundances (Grouped): F4	Abundances (Grouped): F3	Quan Info	Found in Sample: [S4] F4: Sample	Found in Sample: [S3] F3: Sample	Confidence (by Search Engine): Sequest HT	Percolator q-Value (by Search Engine): Sequest HT	Percolator PEP (by Search Engine): Sequest HT	XCorr (by Search Engine): Sequest HT	Top Apex RT [min]	Sequence in Protein	Positions in Proteins	Quan Usage	Quan Ratio Usage
[K].NGGIDTDKDYPYK.[G]	1xDeamidated [N1]	FALSE	0.00185346	0.000987479	1	1	3	P43297	P43297 [215-227]		1	1486.67	0	100	5.76991e-17		37079.8			High	Not Found	High	0.0001991	0.0003704	3.34	69.55	K.NGGIDTDKDYPYK.G	[215-227]	Used	Used
[K].VVTIDSYEDVPTYSEESLK.[K]		FALSE	0.00241747	0.000987479	1	1	1	P43297	P43297 [242-260]		0	2174.04	0	100	5.76991e-17		19669.8			High	Not Found	High	0.0001991	0.0004866	3.26	124.48	K.VVTIDSYEDVPTYSEESLK.K	[242-260]	Used	Used
[K].SWGESGYLR.[M]		FALSE	0.00295877	0.00143413	1	1	2	P43297	P43297 [322-330]		0	1054.5	0	8.111	0.218848	0	115562	14246.7		High	Peak Found	High	0.0002813	0.0006028	2.3	94.22	K.SWGESGYLR.M	[322-330]	Used	Used
[K].VVTIDSYEDVPTYSEESLKK.[A]		FALSE	0.0245787	0.00400174	1	1	2	P43297	P43297 [242-261]		1	2302.13	0	4.432	0.73236	0	89860.6	20273.9		High	Peak Found	High	0.0007949	0.005483	1.84	114.64	K.VVTIDSYEDVPTYSEESLKK.A	[242-261]	Used	Used
Q9LYK8	Superoxide dismutase [Mn] 2, mitochondrial OS=Arabidopsis thaliana OX=3702 GN=MSD2 PE=2 SV=1	0	FALSE	42.244	57	10	90	10	241	26.9	6.76	238.44	10	0	1.02	0.297277	67.27	1.86844e+06	1.92053e+06	High	High	1		0.0285692	-0.00860017
Annotated Sequence	Modifications	Contaminant	Qvality PEP	Qvality q-value	# Protein Groups	# Proteins	# PSMs	Master Protein Accessions	Positions in Master Proteins	Modifications in Master Proteins	# Missed Cleavages	Theo. MH+ [Da]	# Razor Quan Results	Abundance Ratio: (F4) / (F3)	Abundance Ratio Adj. P-Value: (F4) / (F3)	Abundance Ratio Variability [%]: (F4) / (F3)	Abundances (Grouped): F4	Abundances (Grouped): F3	Quan Info	Found in Sample: [S4] F4: Sample	Found in Sample: [S3] F3: Sample	Confidence (by Search Engine): Sequest HT	Percolator q-Value (by Search Engine): Sequest HT	Percolator PEP (by Search Engine): Sequest HT	XCorr (by Search Engine): Sequest HT	Top Apex RT [min]	Sequence in Protein	Positions in Proteins	Quan Usage	Quan Ratio Usage
[K].WQDDYLVVNK.[W]		FALSE	0.000671959	0.000572698	1	1	3	Q8H0S9	Q8H0S9 [752-761]		0	1279.63	0	5.704	0.545352	0	24284.3	4257.3		High	Peak Found	High	0.0001305	0.000131	2.71	110.69	K.WQDDYLVVNK.W	[752-761]	Used	Used
[K].FVQGLGSVLSDSSLDKEFIAK.[A]		FALSE	0.00429646	0.00166669	1	1	1	Q8H0S9	Q8H0S9 [607-627]		1	2240.18	0	4.928	0.616573	0	32023.7	6498.41		High	Peak Found	High	0.0003407	0.0008907	2.06	149.95	K.FVQGLGSVLSDSSLDKEFIAK.A	[607-627]	Used	Used
[K].FSQEIPPTPGQPTKEPTFIPVVVGLLDSSGK.[D]	1xDeamidated [Q11]	FALSE	0.0153386	0.00190722	1	1	1	Q8H0S9	Q8H0S9 [469-499]		1	3266.72	0						No Quan Values	High	Not Found	High	0.0004264	0.003346	3.33		K.FSQEIPPTPGQPTKEPTFIPVVVGLLDSSGK.D	[469-499]	Not Used	Not Used
[K].IWTPAEDLPK.[T]		FALSE	0.0176144	0.0029934	1	1	1	Q8H0S9	Q8H0S9 [217-226]		0	1169.62	0	4.391	0.719767	0	30151.7	6867.12		High	Peak Found	High	0.0006192	0.003868	1.79	122.77	K.IWTPAEDLPK.T	[217-226]	Used	Used
Q84WS0	Subtilisin-like protease SBT1.1 OS=Arabidopsis thaliana OX=3702 GN=SBTI1.1 PE=1 SV=1	0	FALSE	33.686	17	10	26	10	774	83.2	8.18	72.28	10	0	1.238	0.512584	28.99	276926	233151	High	High	1		0.308011	-0.0927206
Annotated Sequence	Modifications	Contaminant	Qvality PEP	Qvality q-value	# Protein Groups	# Proteins	# PSMs	Master Protein Accessions	Positions in Master Proteins	Modifications in Master Proteins	# Missed Cleavages	Theo. MH+ [Da]	# Razor Quan Results	Abundance Ratio: (F4) / (F3)	Abundance Ratio Adj. P-Value: (F4) / (F3)	Abundance Ratio Variability [%]: (F4) / (F3)	Abundances (Grouped): F4	Abundances (Grouped): F3	Quan Info	Found in Sample: [S4] F4: Sample	Found in Sample: [S3] F3: Sample	Confidence (by Search Engine): Sequest HT	Percolator q-Value (by Search Engine): Sequest HT	Percolator PEP (by Search Engine): Sequest HT	XCorr (by Search Engine): Sequest HT	Top Apex RT [min]	Sequence in Protein	Positions in Proteins	Quan Usage	Quan Ratio Usage
[R].EIYDQYGEDALK.[E]		FALSE	0.00087213	0.000572698	1	2	2	P42825	P42825 [69-80]		0	1443.66	0	4.525	0.710368	0	32848.5	7259.61		High	Peak Found	High	0.0001305	0.0001707	3.5	98.96	R.EIYDQYGEDALK.E	[69-80]	Used	Used
Q9SRZ6	Cytosolic isocitrate dehydrogenase [NADP] OS=Arabidopsis thaliana OX=3702 GN=CICDH PE=1 SV=1	0	FALSE	36.605	26	10	24	10	410	45.7	6.57	71.62	10	0	1.347	0.617405	60.79	276985	186407	High	High	1		0.42975	-0.129368
Annotated Sequence	Modifications	Contaminant	Qvality PEP	Qvality q-value	# Protein Groups	# Proteins	# PSMs	Master Protein Accessions	Positions in Master Proteins	Modifications in Master Proteins	# Missed Cleavages	Theo. MH+ [Da]	# Razor Quan Results	Abundance Ratio: (F4) / (F3)	Abundance Ratio Adj. P-Value: (F4) / (F3)	Abundance Ratio Variability [%]: (F4) / (F3)	Abundances (Grouped): F4	Abundances (Grouped): F3	Quan Info	Found in Sample: [S4] F4: Sample	Found in Sample: [S3] F3: Sample	Confidence (by Search Engine): Sequest HT	Percolator q-Value (by Search Engine): Sequest HT	Percolator PEP (by Search Engine): Sequest HT	XCorr (by Search Engine): Sequest HT	Top Apex RT [min]	Sequence in Protein	Positions in Proteins	Quan Usage	Quan Ratio Usage
[K].TIAVPEGFDYELYNR.[N]		FALSE	0.000185751	0.000572698	1	1	3	Q9SRT9	Q9SRT9 [58-72]		0	1786.86	0	4.187	0.757213	0	51204.5	12228.2		High	Peak Found	High	0.0001305	3.536e-05	4.16	138.9	K.TIAVPEGFDYELYNR.N	[58-72]	Used	Used
[R].YVDAVMTIPK.[RG]		FALSE	0.0019057	0.000987479	4	4	4	Q9LUE6; O22666; Q9SRT9; Q9LFW1	Q9LUE6 [195-204]; O22666 [195-204]; Q9SRT9 [199-208]; Q9LFW1 [199-208]		0	1136.6	0	2.068	0.945434	0	147284	71230.8	Shared	High	High	High	0.0001991	0.0003804	2.67	104.95	R.YVDAVMTIPK.G	[199-208]	Not Used	Not Used
[K].ASNPFVNLK.[K]		FALSE	0.00143023	0.000987479	4	4	4	Q9LUE6; O22666; Q9SRT9; Q9LFW1	Q9LUE6 [272-280]; O22666 [272-280]; Q9SRT9 [276-284]; Q9LFW1 [276-284]		0	989.541	0	4.201	0.755566	0	65791.9	15661	Shared	High	High	High	0.0001991	0.000283	2.37	100.72	K.ASNPFVNLK.K	[276-284]	Not Used	Not Used
[R].EGVSTAVSHGLWLNIPDYDAPTQLVKPK.[E]		FALSE	0.00279911	0.00143413	2	2	1	Q9SRT9; Q9LFW1	Q9SRT9 [166-193]; Q9LFW1 [166-193]		0	3035.58	0						No Quan Values	High	Not Found	High	0.0002813	0.0005686	2.74		R.EGVSTAVSHGLWLNIPDYDAPTQLVKPK.E	[166-193]	Not Used	Not Used
[R].GYPFSLR.[ES]		FALSE	0.0414867	0.00486181	3	4	4	Q9LUE6; Q9SRT9; Q9LFW1	Q9LUE6 [155-161]; Q9SRT9 [159-165]; Q9LFW1 [159-165]		0	839.441	0	2.43	0.995854	0	47473.6	19534.6	Shared	High	High	High	0.001076	0.009459	0.97	107.95	R.GYPFSLR.E	[159-165]	Not Used	Not Used
Q9M9P3	UTP--glucose-1-phosphate uridylyltransferase 2 OS=Arabidopsis thaliana OX=3702 GN=UGP2 PE=1 SV=1	0	FALSE	42.601	25	10	26	3	469	51.7	6.13	69.06	10	0	4.175	0.673229	22.21	98942.9	25268.1	High	High	1		2.06178	-0.620656
Annotated Sequence	Modifications	Contaminant	Qvality PEP	Qvality q-value	# Protein Groups	# Proteins	# PSMs	Master Protein Accessions	Positions in Master Proteins	Modifications in Master Proteins	# Missed Cleavages	Theo. MH+ [Da]	# Razor Quan Results	Abundance Ratio: (F4) / (F3)	Abundance Ratio Adj. P-Value: (F4) / (F3)	Abundance Ratio Variability [%]: (F4) / (F3)	Abundances (Grouped): F4	Abundances (Grouped): F3	Quan Info	Found in Sample: [S4] F4: Sample	Found in Sample: [S3] F3: Sample	Confidence (by Search Engine): Sequest HT	Percolator q-Value (by Search Engine): Sequest HT	Percolator PEP (by Search Engine): Sequest HT	XCorr (by Search Engine): Sequest HT	Top Apex RT [min]	Sequence in Protein	Positions in Proteins	Quan Usage	Quan Ratio Usage
[K].VQLLEIAQVPDEHVNEFK.[S]		FALSE	5.80074e-05	0.000572698	2	2	2	Q9M9P3; P57751	Q9M9P3 [267-284]; P57751 [268-285]		0	2108.1	0	1.155	0.700344	0	59812.4	51773.3	Shared	High	High	High	0.0001305	1.086e-05	4.35	136.18	K.VQLLEIAQVPDEHVNEFK.S	[267-284]	Not Used	Not Used
[R].VVADEFVPWPSK.[G]		FALSE	2.95226e-05	0.000572698	2	2	6	Q9M9P3; P57751	Q9M9P3 [168-179]; P57751 [169-180]		0	1373.71	0	2.329	0.963438	0	113613	48777.1	Shared	High	High	High	0.0001305	5.481e-06	4.51	134.21	R.VVADEFVPWPSK.G	[168-179]	Not Used	Not Used
[R].FFDNAIGVNVPR.[S]		FALSE	0.000123203	0.000572698	2	2	2	Q9M9P3; P57751	Q9M9P3 [342-353]; P57751 [343-354]		0	1348.7	0	1.441	0.898399	0	79397.6	55109.3	Shared	High	Peak Found	High	0.0001305	2.334e-05	3.61	123.33	R.FFDNAIGVNVPR.S	[342-353]	Not Used	Not Used
[R].FFDNAIGVNVPR.[S]	1xDeamidated [N4]	FALSE	0.000718992	0.000572698	2	2	2	Q9M9P3; P57751	Q9M9P3 [342-353]; P57751 [343-354]		0	1349.68	0						No Quan Values	High	Not Found	High	0.0001305	0.0001401	3.27		R.FFDNAIGVNVPR.S	[342-353]	Not Used	Not Used
[R].YLSGEAQHIEWSK.[I]		FALSE	1.79812e-05	0.000572698	2	2	3	Q9M9P3; P57751	Q9M9P3 [36-48]; P57751 [37-49]		0	1547.75	0	5.103	0.595303	0	47530.7	9313.76	Shared	High	Peak Found	High	0.0001305	3.303e-06	4.43	89.75	R.YLSGEAQHIEWSK.I	[36-48]	Not Used	Not Used
[K].SIPSIVELDSLK.[V]		FALSE	0.00344099	0.00166669	2	2	3	Q9M9P3; P57751	Q9M9P3 [412-423]; P57751 [413-424]		0	1300.74	0	2.253	0.993138	0	44474.7	19744.4	Shared	High	High	High	0.0003407	0.0007056	1.29	139.76	K.SIPSIVELDSLK.V	[412-423]	Not Used	Not Used
[K].MEIIPNPK.[E]		FALSE	0.00898873	0.00190722	2	2	3	Q9M9P3; P57751	Q9M9P3 [315-322]; P57751 [316-323]		0	941.512	0	4.654	0.678213	0	76717.5	16483.3	Shared	High	Peak Found	High	0.0004264	0.001908	2.47	87.27	K.MEIIPNPK.E	[315-322]	Not Used	Not Used
[K].SGFISLVSR.[Y]		FALSE	0.0100478	0.00190722	1	1	1	Q9M9P3	Q9M9P3 [27-35]		0	965.541	0	2.2	0.959726	0	14290	6494.27		High	Peak Found	High	0.0004264	0.002144	1.97	118.52	K.SGFISLVSR.Y	[27-35]	Used	Used
[K].MTPVSQDVAETK.[N]		FALSE	0.0220041	0.00332708	1	1	2	Q9M9P3	Q9M9P3 [63-74]		0	1305.64	0	4.175	0.757433	0	36485.3	8739.47		High	High	High	0.0006776	0.004895	2.31	63.43	K.MTPVSQDVAETK.N	[63-74]	Used	Used
[K].IQTPTDEIVVPYEK.[M]		FALSE	0.0308349	0.00462251	1	1	1	Q9M9P3	Q9M9P3 [49-62]		0	1631.85	0	4.8	0.647892	0	48167.5	10034.3		High	Peak Found	High	0.0009067	0.006965	1.65	115.07	K.IQTPTDEIVVPYEK.M	[49-62]	Used	Used
[K].KLVEADALK.[M]		FALSE	0.142323	0.00875015	2	2	1	Q9M9P3; P57751	Q9M9P3 [306-314]; P57751 [307-315]		1	986.588	0	1.69	0.919165	0	54057.9	31989.2	Shared	High	Peak Found	High	0.002458	0.03171	2.41	60.85	K.KLVEADALK.M	[306-314]	Not Used	Not Used
Q9LZF6	Cell division control protein 48 homolog E OS=Arabidopsis thaliana OX=3702 GN=CDC48E PE=2 SV=2	0	FALSE	33.147	15	10	32	10	810	89.9	5.2	81.75	10	0	4.183	0.673229	31.59	437524	85772.8	High	High	1		2.06454	-0.621488
Annotated Sequence	Modifications	Contaminant	Qvality PEP	Qvality q-value	# Protein Groups	# Proteins	# PSMs	Master Protein Accessions	Positions in Master Proteins	Modifications in Master Proteins	# Missed Cleavages	Theo. MH+ [Da]	# Razor Quan Results	Abundance Ratio: (F4) / (F3)	Abundance Ratio Adj. P-Value: (F4) / (F3)	Abundance Ratio Variability [%]: (F4) / (F3)	Abundances (Grouped): F4	Abundances (Grouped): F3	Quan Info	Found in Sample: [S4] F4: Sample	Found in Sample: [S3] F3: Sample	Confidence (by Search Engine): Sequest HT	Percolator q-Value (by Search Engine): Sequest HT	Percolator PEP (by Search Engine): Sequest HT	XCorr (by Search Engine): Sequest HT	Top Apex RT [min]	Sequence in Protein	Positions in Proteins	Quan Usage	Quan Ratio Usage
[K].LVPLLTEAGAIADNSSQL.[-]		FALSE	3.85806e-05	0.000572698	1	1	10	Q8L8T2	Q8L8T2 [108-125]		0	1811.97	0	7.978	0.226043	0	119783	15014.2		High	High	High	0.0001305	7.185e-06	2.95	174.25	K.LVPLLTEAGAIADNSSQL.-	[108-125]	Used	Used
[K].EIVSAYPVVVFSK.[T]		FALSE	0.000268916	0.000572698	1	1	4	Q8L8T2	Q8L8T2 [24-36]		0	1437.8	0	2.908	0.933727	0	66801	22972.1		High	High	High	0.0001305	5.155e-05	3.02	135.14	K.EIVSAYPVVVFSK.T	[24-36]	Used	Used
[K].QLLTQLGATFK.[V]		FALSE	0.00188314	0.000987479	1	1	5	Q8L8T2	Q8L8T2 [47-57]		0	1219.7	0	0.993	0.394788	0	21753.1	21899.6		High	High	High	0.0001991	0.0003762	2.74	128.31	K.QLLTQLGATFK.V	[47-57]	Used	Used
[K].AKEIVSAYPVVVFSK.[T]		FALSE	0.0145529	0.00190722	1	1	1	Q8L8T2	Q8L8T2 [22-36]		1	1636.93	0	0.518	0.0594146	0	8401.1	16216.9		Peak Found	High	High	0.0004264	0.00315	2.5	121.31	K.AKEIVSAYPVVVFSK.T	[22-36]	Used	Used
P29525	Oleosin 18.5 kDa OS=Arabidopsis thaliana OX=3702 GN=At4g25140 PE=2 SV=1	0	FALSE	68.965	39	10	373	10	173	18.6	9.44	1039.78	10	0	1.703	0.838229	39.75	3.51279e+07	2.00376e+07	High	High	1		0.768078	-0.231215
Annotated Sequence	Modifications	Contaminant	Qvality PEP	Qvality q-value	# Protein Groups	# Proteins	# PSMs	Master Protein Accessions	Positions in Master Proteins	Modifications in Master Proteins	# Missed Cleavages	Theo. MH+ [Da]	# Razor Quan Results	Abundance Ratio: (F4) / (F3)	Abundance Ratio Adj. P-Value: (F4) / (F3)	Abundance Ratio Variability [%]: (F4) / (F3)	Abundances (Grouped): F4	Abundances (Grouped): F3	Quan Info	Found in Sample: [S4] F4: Sample	Found in Sample: [S3] F3: Sample	Confidence (by Search Engine): Sequest HT	Percolator q-Value (by Search Engine): Sequest HT	Percolator PEP (by Search Engine): Sequest HT	XCorr (by Search Engine): Sequest HT	Top Apex RT [min]	Sequence in Protein	Positions in Proteins	Quan Usage	Quan Ratio Usage
[K].GQHAAPPGSSVETVNENLK.[V]		FALSE	0.000176277	0.000572698	1	1	4	P93736	P93736 [1006-1024]		0	1934.96	0	1.927	0.919939	0	19064.1	9892		High	High	High	0.0001305	3.355e-05	3.84	69.44	K.GQHAAPPGSSVETVNENLK.V	[1006-1024]	Used	Used
Q9LDA7	Probable protein phosphatase 2C 39 OS=Arabidopsis thaliana OX=3702 GN=At3g15260 PE=2 SV=1	0	FALSE	37.566	36	10	32	10	289	31.6	5.81	95.57	10	0	1.808	0.874367	75.11	1.37465e+06	1.34394e+06	High	High	1		0.854395	-0.257198
Annotated Sequence	Modifications	Contaminant	Qvality PEP	Qvality q-value	# Protein Groups	# Proteins	# PSMs	Master Protein Accessions	Positions in Master Proteins	Modifications in Master Proteins	# Missed Cleavages	Theo. MH+ [Da]	# Razor Quan Results	Abundance Ratio: (F4) / (F3)	Abundance Ratio Adj. P-Value: (F4) / (F3)	Abundance Ratio Variability [%]: (F4) / (F3)	Abundances (Grouped): F4	Abundances (Grouped): F3	Quan Info	Found in Sample: [S4] F4: Sample	Found in Sample: [S3] F3: Sample	Confidence (by Search Engine): Sequest HT	Percolator q-Value (by Search Engine): Sequest HT	Percolator PEP (by Search Engine): Sequest HT	XCorr (by Search Engine): Sequest HT	Top Apex RT [min]	Sequence in Protein	Positions in Proteins	Quan Usage	Quan Ratio Usage
[R].SLLDTNPTIESQAR.[T]		FALSE	0.0221254	0.00332708	1	1	1	Q9SJT9	Q9SJT9 [1120-1133]		0	1544.79	0	1.901	0.924348	0	24125.6	12691		Peak Found	High	High	0.0006776	0.004923	2.63	98.99	R.SLLDTNPTIESQAR.T	[1120-1133]	Used	Used
O23654	V-type proton ATPase catalytic subunit A OS=Arabidopsis thaliana OX=3702 GN=VHA-A PE=1 SV=1	0	FALSE	34.89	19	10	23	10	623	68.8	5.24	64.75	10	0	3.249	0.887838	35.53	320972	67862.7	High	High	1		1.7	-0.51175
Annotated Sequence	Modifications	Contaminant	Qvality PEP	Qvality q-value	# Protein Groups	# Proteins	# PSMs	Master Protein Accessions	Positions in Master Proteins	Modifications in Master Proteins	# Missed Cleavages	Theo. MH+ [Da]	# Razor Quan Results	Abundance Ratio: (F4) / (F3)	Abundance Ratio Adj. P-Value: (F4) / (F3)	Abundance Ratio Variability [%]: (F4) / (F3)	Abundances (Grouped): F4	Abundances (Grouped): F3	Quan Info	Found in Sample: [S4] F4: Sample	Found in Sample: [S3] F3: Sample	Confidence (by Search Engine): Sequest HT	Percolator q-Value (by Search Engine): Sequest HT	Percolator PEP (by Search Engine): Sequest HT	XCorr (by Search Engine): Sequest HT	Top Apex RT [min]	Sequence in Protein	Positions in Proteins	Quan Usage	Quan Ratio Usage
[R].TAFDEGPWPK.[M]		FALSE	0.000669118	0.000572698	1	1	5	Q9SU63	Q9SU63 [106-115]		0	1147.54	0	4.663	0.672586	0	51602.6	11065.6		High	High	High	0.0001305	0.0001302	3.76	106.87	R.TAFDEGPWPK.M	[106-115]	Used	Used
[R].TGEVIAHVAEGDAEDINR.[A]		FALSE	2.18707e-06	0.000572698	1	1	2	Q9SU63	Q9SU63 [82-99]		0	1895.91	0	1.975	0.96464	0	72048.5	36481.3		Peak Found	High	High	0.0001305	3.89e-07	5.35	93.47	R.TGEVIAHVAEGDAEDINR.A	[82-99]	Used	Used
[K].TAEQTPLTAFYAGK.[L]		FALSE	0.00135201	0.000987479	1	1	1	Q9SU63	Q9SU63 [230-243]		0	1497.76	0	3.421	0.923336	0	20881	6104.05		High	Peak Found	High	0.0001991	0.0002668	3.36	120.82	K.TAEQTPLTAFYAGK.L	[230-243]	Used	Used
[K].GIEQGPQIDLK.[Q]		FALSE	0.00219816	0.000987479	1	1	2	Q9SU63	Q9SU63 [375-385]		0	1197.65	0	3	0.939328	0	33548.7	11182.1		High	Peak Found	High	0.0001991	0.0004421	3.27	92.77	K.GIEQGPQIDLK.Q	[375-385]	Used	Used
[K].SPFIVFEDADIDK.[A]		FALSE	0.00352441	0.00166669	1	1	1	Q9SU63	Q9SU63 [310-322]		0	1495.73	0						No Quan Values	High	Not Found	High	0.0003407	0.0007241	3.27		K.SPFIVFEDADIDK.A	[310-322]	Not Used	Not Used
[R].FADLVEK.[H]		FALSE	0.0228689	0.00332708	1	1	2	Q9SU63	Q9SU63 [128-134]		0	821.44	0	100	5.76991e-17		74752.9			High	High	High	0.0006776	0.005073	2.77	73.75	R.FADLVEK.H	[128-134]	Used	Used
Q9SJQ9	Fructose-bisphosphate aldolase 6, cytosolic OS=Arabidopsis thaliana OX=3702 GN=FBA6 PE=1 SV=1	0	FALSE	41.761	39	10	37	7	358	38.4	7.39	125.78	10	0	3.199	0.893131	50.77	246904	75207.7	High	High	1		1.67762	-0.505014
Annotated Sequence	Modifications	Contaminant	Qvality PEP	Qvality q-value	# Protein Groups	# Proteins	# PSMs	Master Protein Accessions	Positions in Master Proteins	Modifications in Master Proteins	# Missed Cleavages	Theo. MH+ [Da]	# Razor Quan Results	Abundance Ratio: (F4) / (F3)	Abundance Ratio Adj. P-Value: (F4) / (F3)	Abundance Ratio Variability [%]: (F4) / (F3)	Abundances (Grouped): F4	Abundances (Grouped): F3	Quan Info	Found in Sample: [S4] F4: Sample	Found in Sample: [S3] F3: Sample	Confidence (by Search Engine): Sequest HT	Percolator q-Value (by Search Engine): Sequest HT	Percolator PEP (by Search Engine): Sequest HT	XCorr (by Search Engine): Sequest HT	Top Apex RT [min]	Sequence in Protein	Positions in Proteins	Quan Usage	Quan Ratio Usage
[R].NAEALAEYVNK.[E]		FALSE	0.00016875	0.000572698	1	1	4	O22263	O22263 [118-128]		0	1221.61	0	6.702	0.370148	0	155240	23161.7		High	High	High	0.0001305	3.205e-05	3.65	91.5	R.NAEALAEYVNK.E	[118-128]	Used	Used
[K].YGVSGYPTIQWFPK.[G]		FALSE	0.0008905	0.000572698	1	1	6	O22263	O22263 [92-105]		0	1642.83	0	1.647	0.841733	0	28202	17120.8		High	High	High	0.0001305	0.0001744	4.68	153.06	K.YGVSGYPTIQWFPK.G	[92-105]	Used	Used
[R].DLDDFVSFINEK.[S]		FALSE	0.00025973	0.000572698	1	1	5	O22263	O22263 [237-248]		0	1441.68	0						No Quan Values	High	Not Found	High	0.0001305	4.976e-05	2.62		R.DLDDFVSFINEK.S	[237-248]	Not Used	Not Used
[K].AGHDYDGGRDLDDFVSFINEK.[S]		FALSE	0.00101262	0.000572698	1	1	1	O22263	O22263 [228-248]		1	2370.06	0	0.01	5.76991e-17			9763.41		Not Found	High	High	0.0001305	0.0001984	2.7	143.73	K.AGHDYDGGRDLDDFVSFINEK.S	[228-248]	Used	Used
[K].AGIVESLDALVK.[E]		FALSE	0.000264284	0.000572698	1	1	4	O22263	O22263 [263-274]		0	1214.7	0	2.991	0.929909	0	50652.3	16935.1		High	High	High	0.0001305	5.069e-05	1.5	152.08	K.AGIVESLDALVK.E	[263-274]	Used	Used
[K].YGVSGFPTLK.[F]		FALSE	0.0114894	0.00190722	1	1	1	O22263	O22263 [211-220]		0	1068.57	0	3.248	0.902538	0	82391	25365.3		High	Peak Found	High	0.0004264	0.002462	2.82	116.27	K.YGVSGFPTLK.F	[211-220]	Used	Used
Q9LJ95	Late embryogenesis abundant protein 32 OS=Arabidopsis thaliana OX=3702 GN=ECP31 PE=2 SV=1	0	FALSE	78.109	60	10	71	10	256	26.8	5.52	277.64	10	0	1.957	0.904944	97.57	2.04554e+06	1.13776e+06	High	High	1		0.968644	-0.291591
Annotated Sequence	Modifications	Contaminant	Qvality PEP	Qvality q-value	# Protein Groups	# Proteins	# PSMs	Master Protein Accessions	Positions in Master Proteins	Modifications in Master Proteins	# Missed Cleavages	Theo. MH+ [Da]	# Razor Quan Results	Abundance Ratio: (F4) / (F3)	Abundance Ratio Adj. P-Value: (F4) / (F3)	Abundance Ratio Variability [%]: (F4) / (F3)	Abundances (Grouped): F4	Abundances (Grouped): F3	Quan Info	Found in Sample: [S4] F4: Sample	Found in Sample: [S3] F3: Sample	Confidence (by Search Engine): Sequest HT	Percolator q-Value (by Search Engine): Sequest HT	Percolator PEP (by Search Engine): Sequest HT	XCorr (by Search Engine): Sequest HT	Top Apex RT [min]	Sequence in Protein	Positions in Proteins	Quan Usage	Quan Ratio Usage
[R].DGSVDLSSFR.[T]		FALSE	0.00484525	0.00166669	1	1	1	Q9ASY9	Q9ASY9 [32-41]		0	1082.51	0	3.057	0.939328	0	25825.8	8448.72		High	Peak Found	High	0.0003407	0.001007	2.62	99.3	R.DGSVDLSSFR.T	[32-41]	Used	Used
O50008	5-methyltetrahydropteroyltriglutamate--homocysteine methyltransferase 1 OS=Arabidopsis thaliana OX=3702 GN=MS1 PE=1 SV=1	0	FALSE	37.063	15	10	57	10	765	84.3	6.51	132.12	10	0	2.969	0.92429	28.7	478790	174825	High	High	1		1.56998	-0.47261
Annotated Sequence	Modifications	Contaminant	Qvality PEP	Qvality q-value	# Protein Groups	# Proteins	# PSMs	Master Protein Accessions	Positions in Master Proteins	Modifications in Master Proteins	# Missed Cleavages	Theo. MH+ [Da]	# Razor Quan Results	Abundance Ratio: (F4) / (F3)	Abundance Ratio Adj. P-Value: (F4) / (F3)	Abundance Ratio Variability [%]: (F4) / (F3)	Abundances (Grouped): F4	Abundances (Grouped): F3	Quan Info	Found in Sample: [S4] F4: Sample	Found in Sample: [S3] F3: Sample	Confidence (by Search Engine): Sequest HT	Percolator q-Value (by Search Engine): Sequest HT	Percolator PEP (by Search Engine): Sequest HT	XCorr (by Search Engine): Sequest HT	Top Apex RT [min]	Sequence in Protein	Positions in Proteins	Quan Usage	Quan Ratio Usage
[K].VEAEQPSQPAQSQQQLPEGYSPIHSSEYSK.[N]		FALSE	0.000294577	0.000572698	1	1	1	Q9LFD5	Q9LFD5 [229-258]		0	3329.56	0	100	5.76991e-17		27331.5			High	Not Found	High	0.0001305	5.654e-05	4.08	93.7	K.VEAEQPSQPAQSQQQLPEGYSPIHSSEYSK.N	[229-258]	Used	Used
[K].AVDQNFQVTER.[T]		FALSE	0.000698043	0.000572698	1	1	2	Q9LFD5	Q9LFD5 [165-175]		0	1306.64	0	2.959	0.913866	0	102586	34666.6		High	High	High	0.0001305	0.0001363	3.52	71.61	K.AVDQNFQVTER.T	[165-175]	Used	Used
[K].LTAGTSLVNEK.[I]		FALSE	0.0308349	0.00462251	1	1	2	Q9LFD5	Q9LFD5 [152-162]		0	1132.62	0	100	5.76991e-17		83280.4			High	High	High	0.0009067	0.006964	2.9	69.58	K.LTAGTSLVNEK.I	[152-162]	Used	Used
P25856	Glyceraldehyde-3-phosphate dehydrogenase GAPA1, chloroplastic OS=Arabidopsis thaliana OX=3702 GN=GAPA1 PE=1 SV=3	0	FALSE	42.367	34	10	44	2	396	42.5	7.75	121.87	10	8	2.069	0.92724	47.13	789006	315482	High	High	1		1.04893	-0.31576
Annotated Sequence	Modifications	Contaminant	Qvality PEP	Qvality q-value	# Protein Groups	# Proteins	# PSMs	Master Protein Accessions	Positions in Master Proteins	Modifications in Master Proteins	# Missed Cleavages	Theo. MH+ [Da]	# Razor Quan Results	Abundance Ratio: (F4) / (F3)	Abundance Ratio Adj. P-Value: (F4) / (F3)	Abundance Ratio Variability [%]: (F4) / (F3)	Abundances (Grouped): F4	Abundances (Grouped): F3	Quan Info	Found in Sample: [S4] F4: Sample	Found in Sample: [S3] F3: Sample	Confidence (by Search Engine): Sequest HT	Percolator q-Value (by Search Engine): Sequest HT	Percolator PEP (by Search Engine): Sequest HT	XCorr (by Search Engine): Sequest HT	Top Apex RT [min]	Sequence in Protein	Positions in Proteins	Quan Usage	Quan Ratio Usage
[R].STEASLDEWLEGTTLAK.[T]		FALSE	0.00025973	0.000572698	1	1	1	P45434	P45434 [231-247]		0	1850.9	0	2.122	0.96464	0	38062	17939.7		Peak Found	High	High	0.0001305	4.982e-05	2.99	154.12	R.STEASLDEWLEGTTLAK.T	[231-247]	Used	Used
Q9S7E4	Formate dehydrogenase, chloroplastic/mitochondrial OS=Arabidopsis thaliana OX=3702 GN=FDH1 PE=1 SV=1	0	FALSE	42.461	30	10	36	10	384	42.4	7.5	94.77	10	0	2.119	0.950819	48.27	935313	373472	High	High	1		1.08338	-0.326131
Annotated Sequence	Modifications	Contaminant	Qvality PEP	Qvality q-value	# Protein Groups	# Proteins	# PSMs	Master Protein Accessions	Positions in Master Proteins	Modifications in Master Proteins	# Missed Cleavages	Theo. MH+ [Da]	# Razor Quan Results	Abundance Ratio: (F4) / (F3)	Abundance Ratio Adj. P-Value: (F4) / (F3)	Abundance Ratio Variability [%]: (F4) / (F3)	Abundances (Grouped): F4	Abundances (Grouped): F3	Quan Info	Found in Sample: [S4] F4: Sample	Found in Sample: [S3] F3: Sample	Confidence (by Search Engine): Sequest HT	Percolator q-Value (by Search Engine): Sequest HT	Percolator PEP (by Search Engine): Sequest HT	XCorr (by Search Engine): Sequest HT	Top Apex RT [min]	Sequence in Protein	Positions in Proteins	Quan Usage	Quan Ratio Usage
[K].GGVYTPGIVFGSTDIQQR.[L]		FALSE	4.36218e-05	0.000572698	1	1	6	Q8LGI2	Q8LGI2 [419-436]		0	1894.97	0	2.043	0.936593	0	23378.9	11443.4		High	High	High	0.0001305	8.114e-06	2.56	129.5	K.GGVYTPGIVFGSTDIQQR.L	[419-436]	Used	Used
[R].GYSEESLASQGETKPDLEIITR.[I]		FALSE	5.49766e-06	0.000572698	1	1	7	Q8LGI2	Q8LGI2 [366-387]		0	2423.19	0	1.395	0.825862	0	46210.4	33121.2		High	High	High	0.0001305	9.947e-07	3.12	115.74	R.GYSEESLASQGETKPDLEIITR.I	[366-387]	Used	Used
[K].LPSADAVVVR.[R]		FALSE	0.00101262	0.000572698	1	1	1	Q8LGI2	Q8LGI2 [249-258]		0	1026.59	0	3.977	0.797597	0	60253.2	15151.2		High	Peak Found	High	0.0001305	0.0001987	1.98	84.75	K.LPSADAVVVR.R	[249-258]	Used	Used
[K].FLQTPSSSPLK.[S]		FALSE	0.00966319	0.00190722	1	1	2	Q8LGI2	Q8LGI2 [33-43]		0	1204.66	0	5.948	0.4361	0	47422.5	7973.31		Peak Found	High	High	0.0004264	0.002055	2.67	89.97	K.FLQTPSSSPLK.S	[33-43]	Used	Used
Q9XEC4	Aspartic proteinase A3 OS=Arabidopsis thaliana OX=3702 GN=APA3 PE=2 SV=1	0	FALSE	38.918	25	10	25	10	508	55.5	7.14	59.11	10	0	2.113	0.950819	68.84	397600	174839	High	High	1		1.07929	-0.324899
Annotated Sequence	Modifications	Contaminant	Qvality PEP	Qvality q-value	# Protein Groups	# Proteins	# PSMs	Master Protein Accessions	Positions in Master Proteins	Modifications in Master Proteins	# Missed Cleavages	Theo. MH+ [Da]	# Razor Quan Results	Abundance Ratio: (F4) / (F3)	Abundance Ratio Adj. P-Value: (F4) / (F3)	Abundance Ratio Variability [%]: (F4) / (F3)	Abundances (Grouped): F4	Abundances (Grouped): F3	Quan Info	Found in Sample: [S4] F4: Sample	Found in Sample: [S3] F3: Sample	Confidence (by Search Engine): Sequest HT	Percolator q-Value (by Search Engine): Sequest HT	Percolator PEP (by Search Engine): Sequest HT	XCorr (by Search Engine): Sequest HT	Top Apex RT [min]	Sequence in Protein	Positions in Proteins	Quan Usage	Quan Ratio Usage
[K].GILGYTEDDVVSTDFVGDNR.[S]		FALSE	1.52981e-07	0.000572698	2	2	13	Q9FX54; P25858	Q9FX54 [276-295]; P25858 [276-295]		0	2172.01	0	2.246	0.929407	0	248528	110665	Shared	High	High	High	0.0001305	2.619e-08	6.32	141.67	K.GILGYTEDDVVSTDFVGDNR.S	[276-295]	Used	Used
[K].TLLFGEKPVTVFGIR.[N]		FALSE	2.52091e-05	0.000572698	2	2	11	Q9FX54; P25858	Q9FX54 [70-84]; P25858 [70-84]		0	1676.97	0	2.057	0.946806	0	153576	74661.1	Shared	High	High	High	0.0001305	4.652e-06	1.57	150.33	K.TLLFGEKPVTVFGIR.N	[70-84]	Used	Used
[K].LVSWYDNEWGYSSR.[V]	1xDeamidated [N7]	FALSE	0.000718992	0.000572698	2	2	1	Q9FX54; P25858	Q9FX54 [314-327]; P25858 [314-327]		0	1762.77	0						No Quan Values	High	Not Found	High	0.0001305	0.0001401	4.33		K.LVSWYDNEWGYSSR.V	[314-327]	Not Used	Not Used
[K].LVSWYDNEWGYSSR.[V]		FALSE	0.000169488	0.000572698	2	2	5	Q9FX54; P25858	Q9FX54 [314-327]; P25858 [314-327]		0	1761.79	0	1.728	0.993138	0	268513	155431	Shared	High	High	High	0.0001305	3.221e-05	4.2	136.78	K.LVSWYDNEWGYSSR.V	[314-327]	Used	Used
[R].NPEDIPWAEAGADYVVESTGVFTDKDK.[A]		FALSE	4.93208e-05	0.000572698	1	1	9	P25858	P25858 [85-111]		1	2953.37	0	4.088	0.760657	0	93707.6	22924.1		High	High	High	0.0001305	9.189e-06	3.54	176.27	R.NPEDIPWAEAGADYVVESTGVFTDKDK.A	[85-111]	Used	Used
[R].VPTVDVSVVDLTVR.[L]		FALSE	2.62245e-05	0.000572698	2	2	9	Q9FX54; P25858	Q9FX54 [239-252]; P25858 [239-252]		0	1498.85	0	2.065	0.964424	0	131783	63832.2	Shared	High	High	High	0.0001305	4.847e-06	2.61	138.83	R.VPTVDVSVVDLTVR.L	[239-252]	Used	Used
[K].DAPMFVVGVNEHEYK.[S]		FALSE	8.09332e-05	0.000572698	2	2	2	Q9FX54; P25858	Q9FX54 [131-145]; P25858 [131-145]		0	1734.82	0	100	5.76991e-17		111069		Shared	High	Not Found	High	0.0001305	1.525e-05	4.09	114.92	K.DAPMFVVGVNEHEYK.S	[131-145]	Used	Used
[R].FGIVEGLMTTVHSITATQK.[T]		FALSE	1.03435e-05	0.000572698	2	2	14	Q9FX54; P25858	Q9FX54 [172-190]; P25858 [172-190]		0	2033.07	0	0.335	0.0201355	0	22242.9	66360.5	Shared	High	High	High	0.0001305	1.884e-06	2.37	174.35	R.FGIVEGLMTTVHSITATQK.T	[172-190]	Used	Used
[R].AASFNIIPSSTGAAK.[A]		FALSE	0.000756297	0.000572698	2	2	2	Q9FX54; P25858	Q9FX54 [205-219]; P25858 [205-219]		0	1434.76	0	1.692	0.996262	0	754006	445643	Shared	High	High	High	0.0001305	0.0001478	4.02	108.84	R.AASFNIIPSSTGAAK.A	[205-219]	Used	Used
[R].IGINGFGR.[I]	1xDeamidated [N4]	FALSE	0.00136843	0.000987479	2	2	9	Q9FX54; P25858	Q9FX54 [8-15]; P25858 [8-15]		0	834.447	0	2.406	0.923336	0	624834	259698	Shared	High	High	High	0.0001991	0.0002703	2.47	92.86	R.IGINGFGR.I	[8-15]	Used	Used
[K].KVVISAPSK.[D]		FALSE	0.00410764	0.00166669	2	2	2	Q9FX54; P25858	Q9FX54 [122-130]; P25858 [122-130]		1	928.583	0	2.444	0.919939	0	530301	217019	Shared	High	Peak Found	High	0.0003407	0.000849	2.13	48.46	K.KVVISAPSK.D	[122-130]	Used	Used
[K].YDSVHGQWK.[H]		FALSE	0.00621917	0.00166669	2	2	1	Q9FX54; P25858	Q9FX54 [51-59]; P25858 [51-59]		0	1119.52	0	2.252	0.929173	0	350501	155635	Shared	High	Peak Found	High	0.0003948	0.001303	2.66	56.24	K.YDSVHGQWK.H	[51-59]	Used	Used
[K].AGIALSDKFVK.[L]		FALSE	0.00538684	0.00166669	2	2	3	Q9FX54; P25858	Q9FX54 [303-313]; P25858 [303-313]		1	1148.67	0	0.01	5.76991e-17			43334.9	Shared	Not Found	High	High	0.0003948	0.001126	3.36	95.02	K.AGIALSDKFVK.L	[303-313]	Used	Used
[K].AIKEESEGKLK.[G]		FALSE	0.00985325	0.00190722	1	1	1	P25858	P25858 [265-275]		2	1231.69	0	0.084	4.55797e-08	0	2916.59	34812.4		Peak Found	High	High	0.0004264	0.0021	2.47	34.92	K.AIKEESEGKLK.G	[265-275]	Used	Used
[K].LTGMSFR.[V]		FALSE	0.0243064	0.00400174	2	2	5	Q9FX54; P25858	Q9FX54 [232-238]; P25858 [232-238]		0	811.413	0	2.322	0.925353	0	260318	112116	Shared	High	High	High	0.0007407	0.005419	2.08	81.88	K.LTGMSFR.V	[232-238]	Used	Used
P0DH99	Elongation factor 1-alpha 1 OS=Arabidopsis thaliana OX=3702 GN=A1 PE=1 SV=1	0	FALSE	80.977	27	10	112	10	449	49.5	9.11	328.53	10	0	2.823	0.952508	67.79	9.32491e+06	3.95042e+06	High	High	1		1.49723	-0.450711
Annotated Sequence	Modifications	Contaminant	Qvality PEP	Qvality q-value	# Protein Groups	# Proteins	# PSMs	Master Protein Accessions	Positions in Master Proteins	Modifications in Master Proteins	# Missed Cleavages	Theo. MH+ [Da]	# Razor Quan Results	Abundance Ratio: (F4) / (F3)	Abundance Ratio Adj. P-Value: (F4) / (F3)	Abundance Ratio Variability [%]: (F4) / (F3)	Abundances (Grouped): F4	Abundances (Grouped): F3	Quan Info	Found in Sample: [S4] F4: Sample	Found in Sample: [S3] F3: Sample	Confidence (by Search Engine): Sequest HT	Percolator q-Value (by Search Engine): Sequest HT	Percolator PEP (by Search Engine): Sequest HT	XCorr (by Search Engine): Sequest HT	Top Apex RT [min]	Sequence in Protein	Positions in Proteins	Quan Usage	Quan Ratio Usage
[R].KVYIGQGDSGVSYVK.[F]		FALSE	5.01935e-05	0.000572698	1	1	1	Q9LIF8	Q9LIF8 [337-351]		1	1599.84	0	4.092	0.746478	0	106928	26131.6		High	Peak Found	High	0.0001305	9.381e-06	5.18	80.67	R.KVYIGQGDSGVSYVK.F	[337-351]	Used	Used
[K].KSDGVSLSPDEYITDVTGYYK.[T]		FALSE	6.9427e-05	0.000572698	1	1	6	Q9LIF8	Q9LIF8 [50-70]		1	2337.11	0	1.491	0.874632	0	63399.1	42523.3		High	High	High	0.0001305	1.303e-05	5.14	144.64	K.KSDGVSLSPDEYITDVTGYYK.T	[50-70]	Used	Used
[K].IFGTEGEIITMLR.[F]	1xOxidation [M11]	FALSE	0.00015464	0.000572698	1	1	1	Q9LIF8	Q9LIF8 [396-408]		0	1495.78	0	100	5.76991e-17		13514.7			High	Not Found	High	0.0001305	2.944e-05	3.48	137.56	K.IFGTEGEIITMLR.F	[396-408]	Used	Used
[K].IFGTEGEIITMLR.[F]		FALSE	0.000160138	0.000572698	1	1	5	Q9LIF8	Q9LIF8 [396-408]		0	1479.79	0	10.172	0.094919	0	58891.2	5789.46		High	Peak Found	High	0.0001305	3.041e-05	2.27	159.04	K.IFGTEGEIITMLR.F	[396-408]	Used	Used
[R].IFGQDTEVITSLIFK.[T]		FALSE	1.28816e-05	0.000572698	1	1	3	Q9LIF8	Q9LIF8 [226-240]		0	1710.93	0	0.01	5.76991e-17			10728.2		Not Found	High	High	0.0001305	2.354e-06	3.78	181.32	R.IFGQDTEVITSLIFK.T	[226-240]	Used	Used
[K].GKFSPPFGLEGSQK.[Y]		FALSE	0.000136834	0.000572698	1	1	5	Q9LIF8	Q9LIF8 [244-257]		1	1478.76	0	0.01	5.76991e-17			22306.4		High	High	High	0.0001305	2.599e-05	4.61	103.67	K.GKFSPPFGLEGSQK.Y	[244-257]	Used	Used
[K].GGNVGNPWDDGPHEGVR.[K]		FALSE	1.88705e-05	0.000572698	1	1	8	Q9LIF8	Q9LIF8 [320-336]		0	1762.79	0	5.6	0.459472	0	796334	142195		High	High	High	0.0001305	3.465e-06	4.63	83.57	K.GGNVGNPWDDGPHEGVR.K	[320-336]	Used	Used
[R].GTPSATQPPGSAQPTGSAGAK.[K]		FALSE	1.31441e-06	0.000572698	1	1	36	Q9LIF8	Q9LIF8 [294-314]		0	1867.91	0	1.552	0.995854	0	150621	97032.2		High	High	High	0.0001305	2.327e-07	4.35	50.72	R.GTPSATQPPGSAQPTGSAGAK.K	[294-314]	Used	Used
[K].TLLGAEVFEVDPDDYITSVEVQSDR.[I]		FALSE	0.000412725	0.000572698	1	1	4	Q9LIF8	Q9LIF8 [201-225]		0	2797.34	0						No Quan Values	High	Not Found	High	0.0001305	7.982e-05	4.5		K.TLLGAEVFEVDPDDYITSVEVQSDR.I	[201-225]	Not Used	Not Used
[K].SDGVSLSPDEYITDVTGYYK.[T]		FALSE	7.74215e-06	0.000572698	1	1	7	Q9LIF8	Q9LIF8 [51-70]		0	2209.02	0	2.68	0.941598	0	87829.1	32771		High	High	High	0.0001305	1.403e-06	5.45	154.63	K.SDGVSLSPDEYITDVTGYYK.T	[51-70]	Used	Used
[R].RVYIGQGDSGVTYVK.[F]		FALSE	0.000522675	0.000572698	1	1	3	Q9LIF8	Q9LIF8 [169-183]		1	1641.86	0	1.785	0.925353	0	43318.7	24272.6		High	High	High	0.0001305	0.0001012	4.47	83.33	R.RVYIGQGDSGVTYVK.F	[169-183]	Used	Used
[K].DNQIAGFQGISSNVLNSIDVHFAPLPSSSSSSSSLSQANK.[V]	1xDeamidated [N39]	FALSE	7.22198e-05	0.000572698	1	1	1	Q9LIF8	Q9LIF8 [108-147]		0	4091.98	0						No Quan Values	High	Not Found	High	0.0001305	1.356e-05	5.17		K.DNQIAGFQGISSNVLNSIDVHFAPLPSSSSSSSSLSQANK.V	[108-147]	Not Used	Not Used
[K].DNQIAGFQGISSNVLNSIDVHFAPLPSSSSSSSSLSQANK.[V]		FALSE	0.000683435	0.000572698	1	1	1	Q9LIF8	Q9LIF8 [108-147]		0	4091	0						No Quan Values	High	Not Found	High	0.0001305	0.0001329	3.62		K.DNQIAGFQGISSNVLNSIDVHFAPLPSSSSSSSSLSQANK.V	[108-147]	Not Used	Not Used
[R].VYIGQGDSGVTYVK.[F]		FALSE	5.23853e-06	0.000572698	1	1	4	Q9LIF8	Q9LIF8 [170-183]		0	1485.76	0	5.599	0.459472	0	341267	60952.6		High	High	High	0.0001305	9.438e-07	4.77	91.59	R.VYIGQGDSGVTYVK.F	[170-183]	Used	Used
[K].VYIGQGDSGVSYVK.[F]		FALSE	0.000566875	0.000572698	1	1	4	Q9LIF8	Q9LIF8 [338-351]		0	1471.74	0	4.532	0.63669	0	150576	33225.1		Peak Found	High	High	0.0001305	0.0001099	2.77	91.05	K.VYIGQGDSGVSYVK.F	[338-351]	Used	Used
[K].TTGAEDAIAALAFK.[T]		FALSE	8.87058e-06	0.000572698	1	1	5	Q9LIF8	Q9LIF8 [71-84]		0	1378.72	0	2.769	0.874632	0	227358	82121.7		High	High	High	0.0001305	1.61e-06	2.05	140.57	K.TTGAEDAIAALAFK.T	[71-84]	Used	Used
[R].VGGELLNALGAYFAPSSGR.[G]		FALSE	1.91205e-05	0.000572698	1	1	4	Q9LIF8	Q9LIF8 [275-293]		0	1878.97	0	2.84	0.918473	0	106825	37619.8		High	High	High	0.0001305	3.513e-06	2.61	176.71	R.VGGELLNALGAYFAPSSGR.G	[275-293]	Used	Used
[K].AGADIIHQVGVHVKPISK.[-]		FALSE	0.000660666	0.000572698	1	1	3	Q9LIF8	Q9LIF8 [443-460]		0	1869.07	0	100	5.76991e-17		22740.4			High	Not Found	High	0.0001305	0.0001289	1.88	105.67	K.AGADIIHQVGVHVKPISK.-	[443-460]	Used	Used
[K].TNKTEYGPYGNK.[T]		FALSE	0.00137394	0.000987479	1	1	8	Q9LIF8	Q9LIF8 [85-96]		1	1371.65	0	1.086	0.466671	0	23321.1	21464.9		Peak Found	High	High	0.0001991	0.0002718	3.61	47	K.TNKTEYGPYGNK.T	[85-96]	Used	Used
[K].FSPPFGLEGSQK.[Y]		FALSE	0.00438561	0.00166669	1	1	3	Q9LIF8	Q9LIF8 [246-257]		0	1293.65	0	6.875	0.334362	0	166091	24158.2		High	High	High	0.0003407	0.0009107	1.58	118.56	K.FSPPFGLEGSQK.Y	[246-257]	Used	Used
[R].VGGELLNALGAYFAPSSGR.[G]	1xDeamidated [N7]	FALSE	0.00507504	0.00166669	1	1	1	Q9LIF8	Q9LIF8 [275-293]		0	1879.95	0	100	5.76991e-17		14101.2			High	Not Found	High	0.0003407	0.001059	2.04	157.35	R.VGGELLNALGAYFAPSSGR.G	[275-293]	Used	Used
[K].GGTSWDDGAHDHVR.[R]		FALSE	0.00353852	0.00166669	1	1	2	Q9LIF8	Q9LIF8 [155-168]		0	1509.65	0	2.652	0.890559	0	149144	56232.8		High	High	High	0.0003407	0.0007268	2.82	54.31	K.GGTSWDDGAHDHVR.R	[155-168]	Used	Used
[K].TLLGAEVFEVDPDDYITSVEVQSDR.[I]	1xDeamidated [Q22]	FALSE	0.00853002	0.00190722	1	1	2	Q9LIF8	Q9LIF8 [201-225]		0	2798.33	0						No Quan Values	High	Not Found	High	0.0004264	0.00181	2.07		K.TLLGAEVFEVDPDDYITSVEVQSDR.I	[201-225]	Not Used	Not Used
[R].NQFSIHAPK.[D]		FALSE	0.00865226	0.00190722	1	1	3	Q9LIF8	Q9LIF8 [99-107]		0	1041.55	0	4.426	0.620757	0	339213	76645.1		High	High	High	0.0004264	0.001835	2.73	68.8	R.NQFSIHAPK.D	[99-107]	Used	Used
[K].SVLLKEDGHK.[I]		FALSE	0.132321	0.00846828	1	1	6	Q9LIF8	Q9LIF8 [426-435]		1	1125.63	0	0.614	0.107558	0	9444.12	15376.8		Peak Found	High	High	0.002294	0.02942	2.32	39.64	K.SVLLKEDGHK.I	[426-435]	Used	Used
F4IQK5	Vicilin-like seed storage protein At2g18540 OS=Arabidopsis thaliana OX=3702 GN=At2g18540 PE=3 SV=1	0	FALSE	41.336	18	10	38	10	707	84.7	6.16	106.48	10	0	2.172	0.952508	25.19	446569	255957	High	High	1		1.11902	-0.33686
Annotated Sequence	Modifications	Contaminant	Qvality PEP	Qvality q-value	# Protein Groups	# Proteins	# PSMs	Master Protein Accessions	Positions in Master Proteins	Modifications in Master Proteins	# Missed Cleavages	Theo. MH+ [Da]	# Razor Quan Results	Abundance Ratio: (F4) / (F3)	Abundance Ratio Adj. P-Value: (F4) / (F3)	Abundance Ratio Variability [%]: (F4) / (F3)	Abundances (Grouped): F4	Abundances (Grouped): F3	Quan Info	Found in Sample: [S4] F4: Sample	Found in Sample: [S3] F3: Sample	Confidence (by Search Engine): Sequest HT	Percolator q-Value (by Search Engine): Sequest HT	Percolator PEP (by Search Engine): Sequest HT	XCorr (by Search Engine): Sequest HT	Top Apex RT [min]	Sequence in Protein	Positions in Proteins	Quan Usage	Quan Ratio Usage
[R].VGSMVQQTVNAR.[S]		FALSE	9.98647e-05	0.000572698	1	1	1	Q9SYG7	Q9SYG7 [248-259]		0	1289.66	0	1.582	0.917674	0	71267.9	45062.1		Peak Found	High	High	0.0001305	1.881e-05	4.43	67.09	R.VGSMVQQTVNAR.S	[248-259]	Used	Used
[R].IPLVSFTGSSR.[V]		FALSE	0.00119763	0.000987479	1	1	3	Q9SYG7	Q9SYG7 [237-247]		0	1163.64	0	2.612	0.944245	0	92450.8	35392.7		High	High	High	0.0001991	0.0002361	2.81	115.94	R.IPLVSFTGSSR.V	[237-247]	Used	Used
[K].IWMQVTAPK.[R]		FALSE	0.00470551	0.00166669	1	1	3	Q9SYG7	Q9SYG7 [71-79]		0	1073.58	0	1.601	0.83179	0	27275.7	17040.6		Peak Found	High	High	0.0003407	0.000976	1.86	104.9	K.IWMQVTAPK.R	[71-79]	Used	Used
[K].LVAEVLEK.[N]		FALSE	0.00857053	0.00190722	1	1	1	Q9SYG7	Q9SYG7 [203-210]		0	900.54	0	5.841	0.433414	0	39476.9	6759.15		High	Peak Found	High	0.0004264	0.001814	2.06	79.85	K.LVAEVLEK.N	[203-210]	Used	Used
[R].SKLDYLGR.[L]		FALSE	0.0469365	0.00486181	1	1	3	Q9SYG7	Q9SYG7 [93-100]		1	951.526	0	2.817	0.945037	0	50645.1	17981.3		High	High	High	0.001076	0.01068	2.5	67.74	R.SKLDYLGR.L	[93-100]	Used	Used
[R].LLSLEMGK.[I]		FALSE	0.0556866	0.00545717	1	1	2	Q9SYG7	Q9SYG7 [101-108]		0	890.502	0	3.394	0.89746	0	35592.1	10487.3		High	Peak Found	High	0.001308	0.01268	2.15	104.35	R.LLSLEMGK.I	[101-108]	Used	Used
Q9FGT8	Temperature-induced lipocalin-1 OS=Arabidopsis thaliana OX=3702 GN=TIL PE=1 SV=1	0	FALSE	39.465	51	10	37	10	186	21.4	6.35	106.12	10	0	2.717	0.960871	66.49	1.1194e+06	579361	High	High	1		1.44201	-0.43409
Annotated Sequence	Modifications	Contaminant	Qvality PEP	Qvality q-value	# Protein Groups	# Proteins	# PSMs	Master Protein Accessions	Positions in Master Proteins	Modifications in Master Proteins	# Missed Cleavages	Theo. MH+ [Da]	# Razor Quan Results	Abundance Ratio: (F4) / (F3)	Abundance Ratio Adj. P-Value: (F4) / (F3)	Abundance Ratio Variability [%]: (F4) / (F3)	Abundances (Grouped): F4	Abundances (Grouped): F3	Quan Info	Found in Sample: [S4] F4: Sample	Found in Sample: [S3] F3: Sample	Confidence (by Search Engine): Sequest HT	Percolator q-Value (by Search Engine): Sequest HT	Percolator PEP (by Search Engine): Sequest HT	XCorr (by Search Engine): Sequest HT	Top Apex RT [min]	Sequence in Protein	Positions in Proteins	Quan Usage	Quan Ratio Usage
[R].LYSSLWNADQWATR.[G]		FALSE	2.66888e-05	0.000572698	1	1	4	Q38907	Q38907 [188-201]		0	1710.82	0	1.065	0.918473	0	130956	122973		High	High	High	0.0001305	4.941e-06	4.4	143.64	R.LYSSLWNADQWATR.G	[188-201]	Used	Used
[K].LVPGNSAGTVTAYYLK.[S]		FALSE	0.00118312	0.000987479	1	1	5	Q38907	Q38907 [81-96]		0	1653.88	0	1.35	0.96464	0	142352	105447		High	High	High	0.0001991	0.000233	2.36	115.77	K.LVPGNSAGTVTAYYLK.S	[81-96]	Used	Used
[K].NLQHMGIQYPK.[L]		FALSE	0.00234204	0.000987479	1	1	7	Q38907	Q38907 [172-182]		0	1328.68	0	0.951	0.548731	0	51621.6	54290		High	High	High	0.0001991	0.0004722	3.73	85.19	K.NLQHMGIQYPK.L	[172-182]	Used	Used
[K].VLNNGELLTLSLDR.[A]	1xDeamidated [N4]	FALSE	0.00178836	0.000987479	1	1	2	Q38907	Q38907 [45-58]		0	1557.85	0	0.438	0.0152659	0	13995.7	31966.2		High	High	High	0.0001991	0.0003565	1.75	144.04	K.VLNNGELLTLSLDR.A	[45-58]	Used	Used
[K].APFTASYR.[NG]		FALSE	0.0126529	0.00190722	1	3	2	Q38907	Q38907 [212-219]		0	912.457	0	1.414	0.974754	0	473010	334613		High	High	High	0.0004264	0.00272	2.5	70.03	K.APFTASYR.N	[212-219]	Used	Used
[K].KEYLFGK.[I]		FALSE	0.022618	0.00332708	1	4	2	Q38907	Q38907 [68-74]		1	884.488	0	2.451	0.919939	0	356704	145558		High	High	High	0.0006776	0.005025	1.87	71.69	K.KEYLFGK.I	[68-74]	Used	Used
Q9SRG3	Protein disulfide isomerase-like 1-2 OS=Arabidopsis thaliana OX=3702 GN=PDIL1-2 PE=2 SV=1	0	FALSE	33.132	23	9	37	6	508	56.3	5	102.42	9	0	5.033	0.481821	30.49	317260	61086.9	High	High	1
Annotated Sequence	Modifications	Contaminant	Qvality PEP	Qvality q-value	# Protein Groups	# Proteins	# PSMs	Master Protein Accessions	Positions in Master Proteins	Modifications in Master Proteins	# Missed Cleavages	Theo. MH+ [Da]	# Razor Quan Results	Abundance Ratio: (F4) / (F3)	Abundance Ratio Adj. P-Value: (F4) / (F3)	Abundance Ratio Variability [%]: (F4) / (F3)	Abundances (Grouped): F4	Abundances (Grouped): F3	Quan Info	Found in Sample: [S4] F4: Sample	Found in Sample: [S3] F3: Sample	Confidence (by Search Engine): Sequest HT	Percolator q-Value (by Search Engine): Sequest HT	Percolator PEP (by Search Engine): Sequest HT	XCorr (by Search Engine): Sequest HT	Top Apex RT [min]	Sequence in Protein	Positions in Proteins	Quan Usage	Quan Ratio Usage
[K].LFIGGLSWGTDDASLR.[D]		FALSE	1.96839e-06	0.000572698	1	1	4	Q9SVM8	Q9SVM8 [37-52]		0	1707.87	0	100	5.76991e-17		22200.5			High	Not Found	High	0.0001305	3.497e-07	4.91	159.56	K.LFIGGLSWGTDDASLR.D	[37-52]	Used	Used
[R].DAFAHFGDVVDAK.[V]		FALSE	0.0515812	0.00545717	1	1	1	Q9SVM8	Q9SVM8 [53-65]		0	1391.66	0	4.799	0.733087	0	19567.7	4077.16		High	Peak Found	High	0.001308	0.01177	2.18	113.98	R.DAFAHFGDVVDAK.V	[53-65]	Used	Used
O03042	Ribulose bisphosphate carboxylase large chain OS=Arabidopsis thaliana OX=3702 GN=rbcL PE=1 SV=1	0	FALSE	37.128	24	9	33	9	479	52.9	6.29	98.97	9	0	4.798	0.521224	78.37	1.11874e+06	209478	High	High	1		2.26243	-0.68106
Annotated Sequence	Modifications	Contaminant	Qvality PEP	Qvality q-value	# Protein Groups	# Proteins	# PSMs	Master Protein Accessions	Positions in Master Proteins	Modifications in Master Proteins	# Missed Cleavages	Theo. MH+ [Da]	# Razor Quan Results	Abundance Ratio: (F4) / (F3)	Abundance Ratio Adj. P-Value: (F4) / (F3)	Abundance Ratio Variability [%]: (F4) / (F3)	Abundances (Grouped): F4	Abundances (Grouped): F3	Quan Info	Found in Sample: [S4] F4: Sample	Found in Sample: [S3] F3: Sample	Confidence (by Search Engine): Sequest HT	Percolator q-Value (by Search Engine): Sequest HT	Percolator PEP (by Search Engine): Sequest HT	XCorr (by Search Engine): Sequest HT	Top Apex RT [min]	Sequence in Protein	Positions in Proteins	Quan Usage	Quan Ratio Usage
[R].VLDELTLTK.[A]		TRUE	0.00552757	0.00166669	1	6	3	P13645	P13645 [258-266]		0	1031.6	0	3.938	0.837035	0	25271.6	6417.07		High	Peak Found	High	0.0003948	0.001155	2.51	101.85	R.VLDELTLTK.A	[258-266]	Used	Used
P25819	Catalase-2 OS=Arabidopsis thaliana OX=3702 GN=CAT2 PE=1 SV=3	0	FALSE	28.406	24	9	31	4	492	56.9	7.12	75.93	9	2	1.586	0.76587	35.85	113954	71786.1	High	High	1		0.665393	-0.200303
Annotated Sequence	Modifications	Contaminant	Qvality PEP	Qvality q-value	# Protein Groups	# Proteins	# PSMs	Master Protein Accessions	Positions in Master Proteins	Modifications in Master Proteins	# Missed Cleavages	Theo. MH+ [Da]	# Razor Quan Results	Abundance Ratio: (F4) / (F3)	Abundance Ratio Adj. P-Value: (F4) / (F3)	Abundance Ratio Variability [%]: (F4) / (F3)	Abundances (Grouped): F4	Abundances (Grouped): F3	Quan Info	Found in Sample: [S4] F4: Sample	Found in Sample: [S3] F3: Sample	Confidence (by Search Engine): Sequest HT	Percolator q-Value (by Search Engine): Sequest HT	Percolator PEP (by Search Engine): Sequest HT	XCorr (by Search Engine): Sequest HT	Top Apex RT [min]	Sequence in Protein	Positions in Proteins	Quan Usage	Quan Ratio Usage
[K].SLKPTATGDIPSLEPVLR.[S]		FALSE	0.00150666	0.000987479	1	1	2	Q9FF10	Q9FF10 [499-516]		0	1894.06	0	1.6	0.834815	0	27193.7	16997		High	High	High	0.0001991	0.0002982	2.12	123.8	K.SLKPTATGDIPSLEPVLR.S	[499-516]	Used	Used
Q9T0G0	11-beta-hydroxysteroid dehydrogenase-like 5 OS=Arabidopsis thaliana OX=3702 GN=HSD5 PE=2 SV=1	0	FALSE	36.111	28	9	38	9	389	43.4	6.89	104.48	9	0	1.599	0.778654	73.04	490626	434957	High	High	1		0.67717	-0.203848
Annotated Sequence	Modifications	Contaminant	Qvality PEP	Qvality q-value	# Protein Groups	# Proteins	# PSMs	Master Protein Accessions	Positions in Master Proteins	Modifications in Master Proteins	# Missed Cleavages	Theo. MH+ [Da]	# Razor Quan Results	Abundance Ratio: (F4) / (F3)	Abundance Ratio Adj. P-Value: (F4) / (F3)	Abundance Ratio Variability [%]: (F4) / (F3)	Abundances (Grouped): F4	Abundances (Grouped): F3	Quan Info	Found in Sample: [S4] F4: Sample	Found in Sample: [S3] F3: Sample	Confidence (by Search Engine): Sequest HT	Percolator q-Value (by Search Engine): Sequest HT	Percolator PEP (by Search Engine): Sequest HT	XCorr (by Search Engine): Sequest HT	Top Apex RT [min]	Sequence in Protein	Positions in Proteins	Quan Usage	Quan Ratio Usage
[R].LAEPSQLLK.[S]		TRUE	0.00947753	0.00190722	1	1	2	P14923	P14923 [116-124]		0	998.588	0	1.674	0.997269	0	965480	576634		Peak Found	High	High	0.0004264	0.00202	2.18	91.07	R.LAEPSQLLK.S	[116-124]	Used	Used
P17094	60S ribosomal protein L3-1 OS=Arabidopsis thaliana OX=3702 GN=ARP1 PE=1 SV=5	0	FALSE	30.121	26	9	24	9	389	44.5	10.17	48.82	9	0	1.675	0.813464	91.43	379909	203770	High	High	1		0.744161	-0.224015
Annotated Sequence	Modifications	Contaminant	Qvality PEP	Qvality q-value	# Protein Groups	# Proteins	# PSMs	Master Protein Accessions	Positions in Master Proteins	Modifications in Master Proteins	# Missed Cleavages	Theo. MH+ [Da]	# Razor Quan Results	Abundance Ratio: (F4) / (F3)	Abundance Ratio Adj. P-Value: (F4) / (F3)	Abundance Ratio Variability [%]: (F4) / (F3)	Abundances (Grouped): F4	Abundances (Grouped): F3	Quan Info	Found in Sample: [S4] F4: Sample	Found in Sample: [S3] F3: Sample	Confidence (by Search Engine): Sequest HT	Percolator q-Value (by Search Engine): Sequest HT	Percolator PEP (by Search Engine): Sequest HT	XCorr (by Search Engine): Sequest HT	Top Apex RT [min]	Sequence in Protein	Positions in Proteins	Quan Usage	Quan Ratio Usage
[K].GSLFLGDVATQVK.[N]		FALSE	0.000442151	0.000572698	1	1	1	Q9SMX3	Q9SMX3 [49-61]		0	1334.73	0	4.016	0.788155	0	82994.1	20667.7		High	Peak Found	High	0.0001305	8.541e-05	1.97	125.86	K.GSLFLGDVATQVK.N	[49-61]	Used	Used
[K].GPGLYTEIGK.[K]		FALSE	0.00438561	0.00166669	2	2	2	Q9SRH5; Q9SMX3	Q9SRH5 [4-13]; Q9SMX3 [4-13]		0	1034.55	0	6.683	0.294606	0	40528.1	6064.19	Shared	High	Peak Found	High	0.0003407	0.000908	2.05	87.44	K.GPGLYTEIGK.K	[4-13]	Used	Used
[K].VGIALALKP.[-]		FALSE	0.013813	0.00190722	1	1	1	Q9SMX3	Q9SMX3 [266-274]		0	881.582	0	0.851	0.294263	0	14542.9	17087		Peak Found	High	High	0.0004264	0.002987	1.85	122.79	K.VGIALALKP.-	[266-274]	Used	Used
[K].SFFTVSGEVDSK.[A]		FALSE	0.00890315	0.00190722	1	1	1	Q9SMX3	Q9SMX3 [247-258]		0	1302.62	0	0.75	0.225665	0	13891.2	18509.4		Peak Found	High	High	0.0004264	0.001888	2.57	113.17	K.SFFTVSGEVDSK.A	[247-258]	Used	Used
P92549	ATP synthase subunit alpha, mitochondrial OS=Arabidopsis thaliana OX=3702 GN=ATPA PE=1 SV=2	0	FALSE	35.345	21	9	23	9	507	55	6.61	57.79	9	0	1.827	0.874367	39.15	703600	295824	High	High	1		0.869477	-0.261739
Annotated Sequence	Modifications	Contaminant	Qvality PEP	Qvality q-value	# Protein Groups	# Proteins	# PSMs	Master Protein Accessions	Positions in Master Proteins	Modifications in Master Proteins	# Missed Cleavages	Theo. MH+ [Da]	# Razor Quan Results	Abundance Ratio: (F4) / (F3)	Abundance Ratio Adj. P-Value: (F4) / (F3)	Abundance Ratio Variability [%]: (F4) / (F3)	Abundances (Grouped): F4	Abundances (Grouped): F3	Quan Info	Found in Sample: [S4] F4: Sample	Found in Sample: [S3] F3: Sample	Confidence (by Search Engine): Sequest HT	Percolator q-Value (by Search Engine): Sequest HT	Percolator PEP (by Search Engine): Sequest HT	XCorr (by Search Engine): Sequest HT	Top Apex RT [min]	Sequence in Protein	Positions in Proteins	Quan Usage	Quan Ratio Usage
[K].GGIGVIQIDEAALR.[E]		FALSE	0.000184137	0.000572698	1	2	4	O50008	O50008 [597-610]		0	1411.79	0	4.366	0.726492	0	53667	12292.1		High	High	High	0.0001305	3.517e-05	3.4	134.16	K.GGIGVIQIDEAALR.E	[597-610]	Used	Used
[K].GVTAFGFDLVR.[G]		FALSE	0.000850551	0.000572698	1	2	4	O50008	O50008 [260-270]		0	1181.63	0	1.57	0.863002	0	36187.9	23044.8		High	High	High	0.0001305	0.0001663	2.53	148.41	K.GVTAFGFDLVR.G	[260-270]	Used	Used
[K].YGAGIGPGVYDIHSPR.[I]		FALSE	0.000430884	0.000572698	1	3	9	O50008	O50008 [689-704]		0	1658.83	0	1.769	0.925547	0	48337.8	27319.2		High	High	High	0.0001305	8.31e-05	2.5	99.57	K.YGAGIGPGVYDIHSPR.I	[689-704]	Used	Used
[K].FALESFWDGK.[ST]		FALSE	0.000274818	0.000572698	1	3	5	O50008	O50008 [19-28]		0	1199.57	0	3.539	0.863495	0	59270.8	16748.5		High	High	High	0.0001305	5.27e-05	3.3	152.93	K.FALESFWDGK.S	[19-28]	Used	Used
[K].YLFAGVVDGR.[N]		FALSE	0.00197499	0.000987479	1	2	6	O50008	O50008 [287-296]		0	1096.58	0	2.389	0.993138	0	62344.2	26093.9		High	High	High	0.0001991	0.0003946	3.27	120.57	K.YLFAGVVDGR.N	[287-296]	Used	Used
[K].SWLAFAAQK.[V]		FALSE	0.00117353	0.000987479	1	3	1	O50008	O50008 [349-357]		0	1021.55	0	100	5.76991e-17		8974.15			High	Not Found	High	0.0001991	0.0002312	2.34	124.89	K.SWLAFAAQK.V	[349-357]	Used	Used
[K].KLNLPILPTTTIGSFPQTVELR.[R]		FALSE	0.00186084	0.000987479	1	2	5	O50008	O50008 [426-447]		1	2438.4	0	3.044	0.929173	0	43773.4	14380.5		High	High	High	0.0001991	0.0003716	2.31	164.97	K.KLNLPILPTTTIGSFPQTVELR.R	[426-447]	Used	Used
[R].GNASVPAMEMTK.[W]		FALSE	0.00215502	0.000987479	1	2	14	O50008	O50008 [100-111]		0	1235.58	0	2.897	0.934141	0	64046.7	22109.5		High	High	High	0.0001991	0.000433	2.63	76.52	R.GNASVPAMEMTK.W	[100-111]	Used	Used
[K].LNLPILPTTTIGSFPQTVELR.[R]		FALSE	0.00175316	0.000987479	1	2	2	O50008	O50008 [427-447]		0	2310.31	0						No Quan Values	High	Not Found	High	0.0001991	0.0003496	3.01		K.LNLPILPTTTIGSFPQTVELR.R	[427-447]	Not Used	Not Used
[R].IPSSEEIADR.[V]		FALSE	0.00321587	0.00143413	1	1	7	O50008	O50008 [705-714]		0	1116.55	0	3.112	0.887514	0	102188	32836.6		High	High	High	0.0002813	0.0006579	2.64	62.95	R.IPSSEEIADR.V	[705-714]	Used	Used
Q42560	Aconitate hydratase 1 OS=Arabidopsis thaliana OX=3702 GN=ACO1 PE=1 SV=2	0	FALSE	30.042	16	9	19	7	898	98.1	6.4	52.11	9	2	2.045	0.92429	37.41	447283	227507	High	High	1		1.0321	-0.310693
Annotated Sequence	Modifications	Contaminant	Qvality PEP	Qvality q-value	# Protein Groups	# Proteins	# PSMs	Master Protein Accessions	Positions in Master Proteins	Modifications in Master Proteins	# Missed Cleavages	Theo. MH+ [Da]	# Razor Quan Results	Abundance Ratio: (F4) / (F3)	Abundance Ratio Adj. P-Value: (F4) / (F3)	Abundance Ratio Variability [%]: (F4) / (F3)	Abundances (Grouped): F4	Abundances (Grouped): F3	Quan Info	Found in Sample: [S4] F4: Sample	Found in Sample: [S3] F3: Sample	Confidence (by Search Engine): Sequest HT	Percolator q-Value (by Search Engine): Sequest HT	Percolator PEP (by Search Engine): Sequest HT	XCorr (by Search Engine): Sequest HT	Top Apex RT [min]	Sequence in Protein	Positions in Proteins	Quan Usage	Quan Ratio Usage
[R].TFNVFEEDPDFENNNGR.[S]	1xDeamidated [N]	FALSE	8.97187e-07	0.000572698	1	1	5	F4IQK5	F4IQK5 [246-262]		0	2044.85	0	2.441	0.963438	0	96322.4	39462		High	High	High	0.0001305	1.575e-07	6	136.33	R.TFNVFEEDPDFENNNGR.S	[246-262]	Used	Used
[K].TNHPQFLVGQSSVLK.[V]		FALSE	0.000749955	0.000572698	1	1	7	F4IQK5	F4IQK5 [370-384]		0	1654.89	0	1.49	0.928215	0	89297.9	59941.7		High	High	High	0.0001305	0.0001462	2.31	102.62	K.TNHPQFLVGQSSVLK.V	[370-384]	Used	Used
[K].SESFMVEEGDVFVVPK.[F]		FALSE	0.000274818	0.000572698	1	1	4	F4IQK5	F4IQK5 [330-345]		0	1798.86	0						No Quan Values	High	Not Found	High	0.0001305	5.275e-05	3.39		K.SESFMVEEGDVFVVPK.F	[330-345]	Not Used	Not Used
[R].SAFAVPEDILR.[K]		FALSE	0.00044597	0.000572698	1	1	4	F4IQK5	F4IQK5 [175-185]		0	1217.65	0	2.49	0.941598	0	109056	43805.9		High	High	High	0.0001305	8.615e-05	1.97	135.02	R.SAFAVPEDILR.K	[175-185]	Used	Used
[R].DLLLGFDDR.[T]		FALSE	0.000564462	0.000572698	1	1	9	F4IQK5	F4IQK5 [163-171]		0	1063.54	0	2.172	0.99001	0	50506.1	23253.9		High	High	High	0.0001305	0.0001096	2.48	138.85	R.DLLLGFDDR.T	[163-171]	Used	Used
[R].SIVVDEKDLDALK.[G]		FALSE	0.0013962	0.000987479	1	1	2	F4IQK5	F4IQK5 [263-275]		1	1444.79	0	1.746	0.919939	0	39131.7	22414.5		High	Peak Found	High	0.0001991	0.0002755	3.18	110.72	R.SIVVDEKDLDALK.G	[263-275]	Used	Used
[R].DATKPPLIVNALPR.[N]		FALSE	0.0034273	0.00143413	1	1	3	F4IQK5	F4IQK5 [189-202]		0	1504.88	0	2.541	0.981677	0	54774.2	21556.6		High	Peak Found	High	0.0002813	0.0007013	2.76	116.89	R.DATKPPLIVNALPR.N	[189-202]	Used	Used
[R].VYAIFNVGK.[C]		FALSE	0.00348243	0.00166669	1	1	1	F4IQK5	F4IQK5 [140-148]		0	1010.57	0	0.232	0.000542711	0	7480.8	32242		Peak Found	High	High	0.0003407	0.000714	1.72	120.11	R.VYAIFNVGK.C	[140-148]	Used	Used
[R].SGTVFYVHSNEK.[L]		FALSE	0.00861128	0.00190722	1	1	1	F4IQK5	F4IQK5 [126-137]		0	1367.66	0	0.01	5.76991e-17			13280.6		Not Found	High	High	0.0004264	0.001827	2.74	65.57	R.SGTVFYVHSNEK.L	[126-137]	Used	Used
[R].VVNQQSLSSCK.[N]	1xCarbamidomethyl [C10]	FALSE	0.0315571	0.00462251	1	1	2	F4IQK5	F4IQK5 [315-325]		0	1249.62	0						No Quan Values	High	Not Found	High	0.0009067	0.007117	2.46		R.VVNQQSLSSCK.N	[315-325]	Not Used	Not Used
Q9SS98	Oleosin 5 OS=Arabidopsis thaliana OX=3702 GN=At3g01570 PE=2 SV=1	0	FALSE	60.468	30	9	197	9	183	19.7	7.77	621.16	9	0	2.156	0.952508	81.34	1.48994e+07	9.41011e+06	High	High	1		1.10836	-0.333649
Annotated Sequence	Modifications	Contaminant	Qvality PEP	Qvality q-value	# Protein Groups	# Proteins	# PSMs	Master Protein Accessions	Positions in Master Proteins	Modifications in Master Proteins	# Missed Cleavages	Theo. MH+ [Da]	# Razor Quan Results	Abundance Ratio: (F4) / (F3)	Abundance Ratio Adj. P-Value: (F4) / (F3)	Abundance Ratio Variability [%]: (F4) / (F3)	Abundances (Grouped): F4	Abundances (Grouped): F3	Quan Info	Found in Sample: [S4] F4: Sample	Found in Sample: [S3] F3: Sample	Confidence (by Search Engine): Sequest HT	Percolator q-Value (by Search Engine): Sequest HT	Percolator PEP (by Search Engine): Sequest HT	XCorr (by Search Engine): Sequest HT	Top Apex RT [min]	Sequence in Protein	Positions in Proteins	Quan Usage	Quan Ratio Usage
[K].STEILIR.[K]		FALSE	0.0102976	0.00190722	1	4	11	Q9FKQ3	Q9FKQ3 [58-64]		0	831.493	0	2.207	0.945434	0	128383	58175.4		High	High	High	0.0004264	0.002202	1.93	81.24	K.STEILIR.K	[58-64]	Used	Used
Q9LPW0	Glyceraldehyde-3-phosphate dehydrogenase GAPA2, chloroplastic OS=Arabidopsis thaliana OX=3702 GN=GAPA2 PE=2 SV=1	0	FALSE	39.208	32	9	42	1	399	42.8	8.05	122.08	9	0	2.199	0.956624	0	50089.1	22774.7	High	High	1		1.13685	-0.342225
Annotated Sequence	Modifications	Contaminant	Qvality PEP	Qvality q-value	# Protein Groups	# Proteins	# PSMs	Master Protein Accessions	Positions in Master Proteins	Modifications in Master Proteins	# Missed Cleavages	Theo. MH+ [Da]	# Razor Quan Results	Abundance Ratio: (F4) / (F3)	Abundance Ratio Adj. P-Value: (F4) / (F3)	Abundance Ratio Variability [%]: (F4) / (F3)	Abundances (Grouped): F4	Abundances (Grouped): F3	Quan Info	Found in Sample: [S4] F4: Sample	Found in Sample: [S3] F3: Sample	Confidence (by Search Engine): Sequest HT	Percolator q-Value (by Search Engine): Sequest HT	Percolator PEP (by Search Engine): Sequest HT	XCorr (by Search Engine): Sequest HT	Top Apex RT [min]	Sequence in Protein	Positions in Proteins	Quan Usage	Quan Ratio Usage
[R].IVTEILPATK.[F]		FALSE	0.00787537	0.00190722	1	1	3	P54150	P54150 [213-222]		0	1084.66	0	2.759	0.96464	0	34189.5	12390.3		High	High	High	0.0004264	0.001664	2	95.65	R.IVTEILPATK.F	[213-222]	Used	Used
O65398	Lactoylglutathione lyase GLX1 OS=Arabidopsis thaliana OX=3702 GN=GLX1 PE=1 SV=1	0	FALSE	30.252	33	9	34	9	283	31.9	5.27	99.26	9	0	2.732	0.957777	39.38	1.01198e+06	398781	High	High	1		1.44996	-0.436481
Annotated Sequence	Modifications	Contaminant	Qvality PEP	Qvality q-value	# Protein Groups	# Proteins	# PSMs	Master Protein Accessions	Positions in Master Proteins	Modifications in Master Proteins	# Missed Cleavages	Theo. MH+ [Da]	# Razor Quan Results	Abundance Ratio: (F4) / (F3)	Abundance Ratio Adj. P-Value: (F4) / (F3)	Abundance Ratio Variability [%]: (F4) / (F3)	Abundances (Grouped): F4	Abundances (Grouped): F3	Quan Info	Found in Sample: [S4] F4: Sample	Found in Sample: [S3] F3: Sample	Confidence (by Search Engine): Sequest HT	Percolator q-Value (by Search Engine): Sequest HT	Percolator PEP (by Search Engine): Sequest HT	XCorr (by Search Engine): Sequest HT	Top Apex RT [min]	Sequence in Protein	Positions in Proteins	Quan Usage	Quan Ratio Usage
[R].IVIVDVDENR.[L]		FALSE	0.000698043	0.000572698	1	1	3	Q9FJ95	Q9FJ95 [209-218]		0	1171.63	0	2.22	0.972697	0	31760.4	14304.1		High	High	High	0.0001305	0.0001361	3.02	93.06	R.IVIVDVDENR.L	[209-218]	Used	Used
[K].EVEDAFETSAR.[G]		FALSE	0.000471585	0.000572698	1	1	1	Q9FJ95	Q9FJ95 [343-353]		0	1253.56	0	100	5.76991e-17		50793.1			High	Not Found	High	0.0001305	9.122e-05	3.09	71.98	K.EVEDAFETSAR.G	[343-353]	Used	Used
Q9LDZ0	Heat shock 70 kDa protein 10, mitochondrial OS=Arabidopsis thaliana OX=3702 GN=HSP70-10 PE=1 SV=1	0	FALSE	40.368	19	9	16	8	682	72.9	5.78	46.78	9	0	2.737	0.957777	90.9	1.38503e+06	140158	High	High	1		1.4526	-0.437275
Annotated Sequence	Modifications	Contaminant	Qvality PEP	Qvality q-value	# Protein Groups	# Proteins	# PSMs	Master Protein Accessions	Positions in Master Proteins	Modifications in Master Proteins	# Missed Cleavages	Theo. MH+ [Da]	# Razor Quan Results	Abundance Ratio: (F4) / (F3)	Abundance Ratio Adj. P-Value: (F4) / (F3)	Abundance Ratio Variability [%]: (F4) / (F3)	Abundances (Grouped): F4	Abundances (Grouped): F3	Quan Info	Found in Sample: [S4] F4: Sample	Found in Sample: [S3] F3: Sample	Confidence (by Search Engine): Sequest HT	Percolator q-Value (by Search Engine): Sequest HT	Percolator PEP (by Search Engine): Sequest HT	XCorr (by Search Engine): Sequest HT	Top Apex RT [min]	Sequence in Protein	Positions in Proteins	Quan Usage	Quan Ratio Usage
[R].AEGESEAAQLISDATAK.[A]		FALSE	2.17154e-05	0.000572698	1	2	1	O04331	O04331 [219-235]		0	1690.81	0	2.723	0.975767	0	30338.5	11139.6		High	Peak Found	High	0.0001305	4.005e-06	5.23	125.55	R.AEGESEAAQLISDATAK.A	[219-235]	Used	Used
Q9SAJ4	Phosphoglycerate kinase 3, cytosolic OS=Arabidopsis thaliana OX=3702 GN=PGK3 PE=1 SV=1	0	FALSE	38.887	30	9	25	9	401	42.1	5.68	72.52	9	0	2.71	0.960871	47.42	806207	363172	High	High	1		1.43829	-0.432969
Annotated Sequence	Modifications	Contaminant	Qvality PEP	Qvality q-value	# Protein Groups	# Proteins	# PSMs	Master Protein Accessions	Positions in Master Proteins	Modifications in Master Proteins	# Missed Cleavages	Theo. MH+ [Da]	# Razor Quan Results	Abundance Ratio: (F4) / (F3)	Abundance Ratio Adj. P-Value: (F4) / (F3)	Abundance Ratio Variability [%]: (F4) / (F3)	Abundances (Grouped): F4	Abundances (Grouped): F3	Quan Info	Found in Sample: [S4] F4: Sample	Found in Sample: [S3] F3: Sample	Confidence (by Search Engine): Sequest HT	Percolator q-Value (by Search Engine): Sequest HT	Percolator PEP (by Search Engine): Sequest HT	XCorr (by Search Engine): Sequest HT	Top Apex RT [min]	Sequence in Protein	Positions in Proteins	Quan Usage	Quan Ratio Usage
[K].GPGANAFESGSTFTSGQVTAK.[G]		FALSE	2.35651e-06	0.000572698	1	1	1	O04575	O04575 [73-93]		0	2013.95	0						No Quan Values	High	Not Found	High	0.0001305	4.202e-07	5.36		K.GPGANAFESGSTFTSGQVTAK.G	[73-93]	Not Used	Not Used
[R].VSSASASTATGEAAAAVTR.[K]		FALSE	5.91267e-07	0.000572698	1	1	5	O04575	O04575 [99-117]		0	1707.85	0	2.542	0.906702	0	153564	60414.8		High	High	High	0.0001305	1.031e-07	5.74	80.43	R.VSSASASTATGEAAAAVTR.K	[99-117]	Used	Used
Q8VYL3	Aspartic proteinase A2 OS=Arabidopsis thaliana OX=3702 GN=APA2 PE=2 SV=1	0	FALSE	56.966	28	9	120	7	513	55.7	6.34	375.99	9	0	2.425	0.999265	14.45	3.46502e+06	1.56394e+06	High	High	1		1.27798	-0.384712
Annotated Sequence	Modifications	Contaminant	Qvality PEP	Qvality q-value	# Protein Groups	# Proteins	# PSMs	Master Protein Accessions	Positions in Master Proteins	Modifications in Master Proteins	# Missed Cleavages	Theo. MH+ [Da]	# Razor Quan Results	Abundance Ratio: (F4) / (F3)	Abundance Ratio Adj. P-Value: (F4) / (F3)	Abundance Ratio Variability [%]: (F4) / (F3)	Abundances (Grouped): F4	Abundances (Grouped): F3	Quan Info	Found in Sample: [S4] F4: Sample	Found in Sample: [S3] F3: Sample	Confidence (by Search Engine): Sequest HT	Percolator q-Value (by Search Engine): Sequest HT	Percolator PEP (by Search Engine): Sequest HT	XCorr (by Search Engine): Sequest HT	Top Apex RT [min]	Sequence in Protein	Positions in Proteins	Quan Usage	Quan Ratio Usage
[R].NLEAWGGLMGPGYNYYER.[G]		FALSE	1.7484e-06	0.000572698	1	1	2	Q9SIE7	Q9SIE7 [67-84]		0	2089.94	0	100	5.76991e-17		24118.2			High	Not Found	High	0.0001305	3.108e-07	4.16	153.55	R.NLEAWGGLMGPGYNYYER.G	[67-84]	Used	Used
[K].AGTDSIISAR.[IV]		FALSE	0.000798768	0.000572698	2	2	6	O65660; Q9SIE7	O65660 [43-52]; Q9SIE7 [45-54]		0	990.521	0	2.184	0.935609	0	244364	111892	Shared	High	High	High	0.0001305	0.0001557	3.7	65.95	K.AGTDSIISAR.V	[45-54]	Not Used	Not Used
[R].GNLDIFSGK.[A]		FALSE	0.0040087	0.00166669	1	1	2	Q9SIE7	Q9SIE7 [85-93]		0	950.494	0	2.497	0.999906	0	27927.9	11185.3		High	High	High	0.0003407	0.0008286	1.75	106.38	R.GNLDIFSGK.A	[85-93]	Used	Used
Q02973	Em-like protein GEA6 OS=Arabidopsis thaliana OX=3702 GN=EM6 PE=2 SV=1	0	FALSE	75.443	75	9	141	9	92	9.9	7.42	619.87	9	0	2.517	0.999265	72.61	1.33908e+07	7.21743e+06	High	High	1		1.33171	-0.400883
Annotated Sequence	Modifications	Contaminant	Qvality PEP	Qvality q-value	# Protein Groups	# Proteins	# PSMs	Master Protein Accessions	Positions in Master Proteins	Modifications in Master Proteins	# Missed Cleavages	Theo. MH+ [Da]	# Razor Quan Results	Abundance Ratio: (F4) / (F3)	Abundance Ratio Adj. P-Value: (F4) / (F3)	Abundance Ratio Variability [%]: (F4) / (F3)	Abundances (Grouped): F4	Abundances (Grouped): F3	Quan Info	Found in Sample: [S4] F4: Sample	Found in Sample: [S3] F3: Sample	Confidence (by Search Engine): Sequest HT	Percolator q-Value (by Search Engine): Sequest HT	Percolator PEP (by Search Engine): Sequest HT	XCorr (by Search Engine): Sequest HT	Top Apex RT [min]	Sequence in Protein	Positions in Proteins	Quan Usage	Quan Ratio Usage
[K].SSMAAVEIGGGPWFGTWK.[G]		FALSE	7.34967e-05	0.000572698	1	1	5	Q94FY7	Q94FY7 [436-453]		0	1880.9	0	2.69	0.996338	0	15546.2	5778.31		High	High	High	0.0001305	1.382e-05	3.49	164.8	K.SSMAAVEIGGGPWFGTWK.G	[436-453]	Used	Used
[R].WEYSTRPVYGWGDVGAK.[Q]		FALSE	0.000167284	0.000572698	1	1	2	Q94FY7	Q94FY7 [227-243]		0	1970.94	0	1.002	0.554096	0	42640.4	42565.8		High	High	High	0.0001305	3.181e-05	2.88	122.26	R.WEYSTRPVYGWGDVGAK.Q	[227-243]	Used	Used
[K].GDTSNTPELLK.[Q]		FALSE	0.00176014	0.000987479	1	1	6	Q94FY7	Q94FY7 [454-464]		0	1174.6	0	2.123	0.941777	0	140569	66219.3		High	High	High	0.0001991	0.0003501	2.95	73.94	K.GDTSNTPELLK.Q	[454-464]	Used	Used
[K].MYEFVPWNGVVR.[W]	1xDeamidated [N8]	FALSE	0.00306626	0.00143413	1	1	1	Q94FY7	Q94FY7 [349-360]		0	1497.72	0	2.464	0.993138	0	16127.9	6545.7		High	Peak Found	High	0.0002813	0.0006239	2.77	152.89	K.MYEFVPWNGVVR.W	[349-360]	Used	Used
[K].LQIWER.[L]		FALSE	0.020271	0.0029934	1	1	2	Q94FY7	Q94FY7 [416-421]		0	844.468	0	3.13	0.925353	0	46164.7	14747.8		High	Peak Found	High	0.0006192	0.004487	1.46	96.35	K.LQIWER.L	[416-421]	Used	Used
P25857	Glyceraldehyde-3-phosphate dehydrogenase GAPB, chloroplastic OS=Arabidopsis thaliana OX=3702 GN=GAPB PE=1 SV=2	0	FALSE	32.751	23	9	38	6	447	47.6	6.8	102.91	9	0	2.387	0.999265	44.94	237207	105877	High	High	1		1.2552	-0.377852
Annotated Sequence	Modifications	Contaminant	Qvality PEP	Qvality q-value	# Protein Groups	# Proteins	# PSMs	Master Protein Accessions	Positions in Master Proteins	Modifications in Master Proteins	# Missed Cleavages	Theo. MH+ [Da]	# Razor Quan Results	Abundance Ratio: (F4) / (F3)	Abundance Ratio Adj. P-Value: (F4) / (F3)	Abundance Ratio Variability [%]: (F4) / (F3)	Abundances (Grouped): F4	Abundances (Grouped): F3	Quan Info	Found in Sample: [S4] F4: Sample	Found in Sample: [S3] F3: Sample	Confidence (by Search Engine): Sequest HT	Percolator q-Value (by Search Engine): Sequest HT	Percolator PEP (by Search Engine): Sequest HT	XCorr (by Search Engine): Sequest HT	Top Apex RT [min]	Sequence in Protein	Positions in Proteins	Quan Usage	Quan Ratio Usage
[R].HSETGMVDQVLLTTNADGLR.[F]	1xOxidation [M6]	FALSE	0.137696	0.00875015	1	1	1	P38420	P38420 [904-923]		0	2173.06	0	24.864	0.00872143	0	1.49273e+06	60037		High	Peak Found	High	0.002458	0.03062	1.75	88.37	R.HSETGMVDQVLLTTNADGLR.F	[904-923]	Used	Used
P04264	*CON* Keratin, type II cytoskeletal 1 OS=Homo sapiens GN=KRT1 PE=1 SV=6	0	TRUE	27.046	13	8	22	8	644	66	8.12	63.53	8	0	18.584	0.000156636	76.27	245802	21828.8	High	High	1		4.21599	-1.26914
Annotated Sequence	Modifications	Contaminant	Qvality PEP	Qvality q-value	# Protein Groups	# Proteins	# PSMs	Master Protein Accessions	Positions in Master Proteins	Modifications in Master Proteins	# Missed Cleavages	Theo. MH+ [Da]	# Razor Quan Results	Abundance Ratio: (F4) / (F3)	Abundance Ratio Adj. P-Value: (F4) / (F3)	Abundance Ratio Variability [%]: (F4) / (F3)	Abundances (Grouped): F4	Abundances (Grouped): F3	Quan Info	Found in Sample: [S4] F4: Sample	Found in Sample: [S3] F3: Sample	Confidence (by Search Engine): Sequest HT	Percolator q-Value (by Search Engine): Sequest HT	Percolator PEP (by Search Engine): Sequest HT	XCorr (by Search Engine): Sequest HT	Top Apex RT [min]	Sequence in Protein	Positions in Proteins	Quan Usage	Quan Ratio Usage
[K].AVPNSNYVVPIDK.[F]		FALSE	0.0433046	0.00486181	1	1	2	Q9FIJ4	Q9FIJ4 [55-67]		0	1415.75	0	6.871	0.316577	0	30481.3	4436.15		High	Peak Found	High	0.001076	0.009855	2.57	94.24	K.AVPNSNYVVPIDK.F	[55-67]	Used	Used
P15459	2S seed storage protein 3 OS=Arabidopsis thaliana OX=3702 GN=AT2S3 PE=1 SV=1	0	FALSE	59.436	60	8	279	4	164	18.8	7.8	644.01	8	5	0.93	0.206709	80.67	9.98316e+07	8.8109e+07	High	High	1		-0.104697	0.0315171
Annotated Sequence	Modifications	Contaminant	Qvality PEP	Qvality q-value	# Protein Groups	# Proteins	# PSMs	Master Protein Accessions	Positions in Master Proteins	Modifications in Master Proteins	# Missed Cleavages	Theo. MH+ [Da]	# Razor Quan Results	Abundance Ratio: (F4) / (F3)	Abundance Ratio Adj. P-Value: (F4) / (F3)	Abundance Ratio Variability [%]: (F4) / (F3)	Abundances (Grouped): F4	Abundances (Grouped): F3	Quan Info	Found in Sample: [S4] F4: Sample	Found in Sample: [S3] F3: Sample	Confidence (by Search Engine): Sequest HT	Percolator q-Value (by Search Engine): Sequest HT	Percolator PEP (by Search Engine): Sequest HT	XCorr (by Search Engine): Sequest HT	Top Apex RT [min]	Sequence in Protein	Positions in Proteins	Quan Usage	Quan Ratio Usage
[R].KEQLGHEGYQEMGHK.[G]		FALSE	4.92631e-06	0.000572698	1	1	23	Q07187	Q07187 [69-83]; [89-103]		1	1770.82	0	0.986	0.887514	0	385315	390947		High	High	High	0.0001305	8.863e-07	4.78	55.89	R.KEQLGHEGYQEMGHK.G; R.KEQLGHEGYQEMGHK.G	[69-83]; [89-103]	Used	Used
[R].KEQLGHEGYQEIGHK.[G]		FALSE	1.01635e-05	0.000572698	1	1	14	Q07187	Q07187 [49-63]		1	1752.87	0	1.498	0.993138	0	288221	192370		High	High	High	0.0001305	1.849e-06	4.81	68.37	R.KEQLGHEGYQEIGHK.G	[49-63]	Used	Used
[K].QGETVVPGGTGGHSLEAQEHLAEGR.[S]		FALSE	9.60066e-05	0.000572698	1	1	2	Q07187	Q07187 [17-41]		0	2516.21	0	3.634	0.746478	0	203577	56021.2		High	High	High	0.0001305	1.811e-05	1.64	87.14	K.QGETVVPGGTGGHSLEAQEHLAEGR.S	[17-41]	Used	Used
[K].SGGERAEEEGIEIDESKFTNK.[-]		FALSE	1.76826e-07	0.000572698	1	1	16	Q07187	Q07187 [132-152]		2	2325.08	0	0.189	0.0617844	0	104508	552376		High	High	High	0.0001305	3.028e-08	7.27	92.66	K.SGGERAEEEGIEIDESKFTNK.-	[132-152]	Used	Used
[K].SGGERAEEEGIEIDESK.[F]		FALSE	0.00024546	0.000572698	1	1	7	Q07187	Q07187 [132-148]		1	1834.83	0	1.668	0.880564	0	34478.9	20671.2		High	High	High	0.0001305	4.704e-05	5.52	68.38	K.SGGERAEEEGIEIDESK.F	[132-148]	Used	Used
[K].AKQGETVVPGGTGGHSLEAQEHLAEGR.[S]		FALSE	4.7355e-06	0.000572698	1	1	1	Q07187	Q07187 [15-41]		1	2715.34	0	0.01	5.76991e-17			30092.5		Not Found	High	High	0.0001305	8.515e-07	5.44	78.42	K.AKQGETVVPGGTGGHSLEAQEHLAEGR.S	[15-41]	Used	Used
[R].AEEEGIEIDESKFTNK.[-]		FALSE	1.58325e-05	0.000572698	1	1	4	Q07187	Q07187 [137-152]		1	1838.87	0	2.475	0.964424	0	95336.6	38520		High	High	High	0.0001305	2.907e-06	6.09	95.28	R.AEEEGIEIDESKFTNK.-	[137-152]	Used	Used
[K].EQLGHEGYQEIGHK.[G]		FALSE	3.41215e-05	0.000572698	1	1	10	Q07187	Q07187 [50-63]		0	1624.77	0	1.366	0.96464	0	595497	435828		High	High	High	0.0001305	6.343e-06	4.52	59.48	K.EQLGHEGYQEIGHK.G	[50-63]	Used	Used
[K].EQLGHEGYQEMGHK.[G]		FALSE	0.000407425	0.000572698	1	1	2	Q07187	Q07187 [70-83]; [90-103]		0	1642.73	0						No Quan Values	Not Found	High	High	0.0001305	7.871e-05	4.4		K.EQLGHEGYQEMGHK.G; K.EQLGHEGYQEMGHK.G	[70-83]; [90-103]	Not Used	Not Used
[R].KEQLGHEGYK.[E]		FALSE	0.00562387	0.00166669	1	1	11	Q07187	Q07187 [109-118]		1	1188.6	0	0.79	0.792972	0	168653	213488		High	High	High	0.0003948	0.001176	2.75	33.52	R.KEQLGHEGYK.E	[109-118]	Used	Used
[R].KGGLSTMEK.[S]		FALSE	0.010874	0.00190722	1	1	2	Q07187	Q07187 [123-131]		1	950.498	0	0.419	0.382138	0	167217	398684		Peak Found	High	High	0.0004264	0.002327	2.74	38.58	R.KGGLSTMEK.S	[123-131]	Used	Used
[R].KEQLGHEGYQEMGHK.[G]	1xOxidation [M12]	FALSE	0.0160869	0.00268212	1	1	5	Q07187	Q07187 [69-83]; [89-103]		1	1786.82	0	5.381	0.678213	0	16163.7	3003.75		High	High	High	0.0005646	0.003514	3.64	37.8	R.KEQLGHEGYQEMGHK.G; R.KEQLGHEGYQEMGHK.G	[69-83]; [89-103]	Used	Used
[K].QLSREELDEKAK.[Q]		FALSE	0.0160869	0.00268212	1	1	2	Q07187	Q07187 [5-16]		2	1445.76	0	0.01	5.76991e-17			123901		Not Found	High	High	0.0005646	0.003507	2.43	46.8	K.QLSREELDEKAK.Q	[5-16]	Used	Used
[K].QLSREELDEK.[A]		FALSE	0.0317407	0.00462251	1	1	6	Q07187	Q07187 [5-14]		1	1246.63	0	0.912	0.498151	0	45742.4	50145		Peak Found	High	High	0.0009067	0.007182	2.61	50.71	K.QLSREELDEK.A	[5-14]	Used	Used
Q9FH31	2S seed storage protein 5 OS=Arabidopsis thaliana OX=3702 GN=SESA5 PE=1 SV=1	0	FALSE	49.807	42	8	108	8	165	18.9	7.59	382.11	8	0	1.39	0.635938	69.81	1.49407e+07	1.0738e+07	High	High	1		0.475085	-0.143015
Annotated Sequence	Modifications	Contaminant	Qvality PEP	Qvality q-value	# Protein Groups	# Proteins	# PSMs	Master Protein Accessions	Positions in Master Proteins	Modifications in Master Proteins	# Missed Cleavages	Theo. MH+ [Da]	# Razor Quan Results	Abundance Ratio: (F4) / (F3)	Abundance Ratio Adj. P-Value: (F4) / (F3)	Abundance Ratio Variability [%]: (F4) / (F3)	Abundances (Grouped): F4	Abundances (Grouped): F3	Quan Info	Found in Sample: [S4] F4: Sample	Found in Sample: [S3] F3: Sample	Confidence (by Search Engine): Sequest HT	Percolator q-Value (by Search Engine): Sequest HT	Percolator PEP (by Search Engine): Sequest HT	XCorr (by Search Engine): Sequest HT	Top Apex RT [min]	Sequence in Protein	Positions in Proteins	Quan Usage	Quan Ratio Usage
[R].NPFGQVPAFEDGDLK.[L]		FALSE	0.000158054	0.000572698	2	2	3	Q9SLM6; P46422	Q9SLM6 [50-64]; P46422 [50-64]		0	1633.79	0	1.464	0.974754	0	120474	82275.8	Shared	High	High	High	0.0001305	3.003e-05	4.12	132.56	R.NPFGQVPAFEDGDLK.L	[50-64]	Not Used	Not Used
[R].VNEWVAEITK.[R]		FALSE	0.000554906	0.000572698	2	2	2	Q9SLM6; P46422	Q9SLM6 [195-204]; P46422 [195-204]		0	1188.63	0	0.827	0.517054	0	60095.4	72662.2	Shared	High	High	High	0.0001305	0.0001075	3.25	118.07	R.VNEWVAEITK.R	[195-204]	Not Used	Not Used
[K].VLDVYEAR.[L]		FALSE	0.00219816	0.000987479	2	3	1	Q9SLM6; P46422	Q9SLM6 [147-154]; P46422 [147-154]		0	964.51	0	0.912	0.509445	0	48191.8	52854.5	Shared	Peak Found	High	High	0.0001991	0.0004415	2.99	76.99	K.VLDVYEAR.L	[147-154]	Not Used	Not Used
[K].LAWEQVFK.[F]		FALSE	0.00116402	0.000987479	1	1	2	Q9SLM6	Q9SLM6 [118-125]		0	1020.55	0	1.592	0.837035	0	13475.8	8467.14		Peak Found	High	High	0.0001991	0.0002294	2.51	135.66	K.LAWEQVFK.F	[118-125]	Used	Used
[R].AITQYIAHR.[Y]		FALSE	0.00718131	0.00166669	2	2	4	Q9SLM6; P46422	Q9SLM6 [70-78]; P46422 [70-78]		0	1072.59	0	1	0.648798	0	60461.1	60456.6	Shared	High	High	High	0.0003948	0.001513	2.92	68.48	R.AITQYIAHR.Y	[70-78]	Not Used	Not Used
Q8RWV0	Transketolase-1, chloroplastic OS=Arabidopsis thaliana OX=3702 GN=TKL-1 PE=1 SV=1	0	FALSE	24.09	13	8	26	4	741	79.9	6.37	74.2	8	0	1.559	0.755064	88.13	144582	76751.6	High	High	1		0.640621	-0.192846
Annotated Sequence	Modifications	Contaminant	Qvality PEP	Qvality q-value	# Protein Groups	# Proteins	# PSMs	Master Protein Accessions	Positions in Master Proteins	Modifications in Master Proteins	# Missed Cleavages	Theo. MH+ [Da]	# Razor Quan Results	Abundance Ratio: (F4) / (F3)	Abundance Ratio Adj. P-Value: (F4) / (F3)	Abundance Ratio Variability [%]: (F4) / (F3)	Abundances (Grouped): F4	Abundances (Grouped): F3	Quan Info	Found in Sample: [S4] F4: Sample	Found in Sample: [S3] F3: Sample	Confidence (by Search Engine): Sequest HT	Percolator q-Value (by Search Engine): Sequest HT	Percolator PEP (by Search Engine): Sequest HT	XCorr (by Search Engine): Sequest HT	Top Apex RT [min]	Sequence in Protein	Positions in Proteins	Quan Usage	Quan Ratio Usage
[K].AMGIMNSFINDIFEK.[L]	1xDeamidated [N6]	FALSE	0.000509422	0.000572698	1	9	2	Q9LZ45	Q9LZ45 [66-80]		0	1730.81	0						No Quan Values	High	High	High	0.0001305	9.863e-05	2.36		K.AMGIMNSFINDIFEK.L	[66-80]	Not Used	Not Used
[K].AMGIMNSFINDIFEK.[L]	1xOxidation [M2]	FALSE	0.00468594	0.00166669	1	9	1	Q9LZ45	Q9LZ45 [66-80]		0	1745.82	0						No Quan Values	Not Found	High	High	0.0003407	0.000975	3.12		K.AMGIMNSFINDIFEK.L	[66-80]	Not Used	Not Used
[K].HAVSEGTK.[A]		FALSE	0.0321117	0.00462251	1	10	1	Q9LZ45	Q9LZ45 [117-124]		0	828.421	0	100	5.76991e-17		10572			High	Not Found	High	0.0009067	0.007261	3.11	16.04	K.HAVSEGTK.A	[117-124]	Used	Used
[R].LVLPGELAK.[H]		FALSE	0.108968	0.00791917	1	9	2	Q9LZ45	Q9LZ45 [108-116]		0	939.587	0	2.341	0.925353	0	354854	151610		High	High	High	0.002084	0.02441	1.46	107.04	R.LVLPGELAK.H	[108-116]	Used	Used
[R].EIQTAVR.[L]		FALSE	0.108968	0.00791917	1	10	9	Q9LZ45	Q9LZ45 [101-107]		0	816.457	0	1.107	0.814451	0	78386.2	70802.4		High	High	High	0.002084	0.02444	2.14	43.38	R.EIQTAVR.L	[101-107]	Used	Used
Q9S7Y7	Alpha-xylosidase 1 OS=Arabidopsis thaliana OX=3702 GN=XYL1 PE=1 SV=1	0	FALSE	28.335	11	8	23	8	915	102.3	6.77	56.1	8	0	1.613	0.778777	49.97	310983	142268	High	High	1		0.689746	-0.207634
Annotated Sequence	Modifications	Contaminant	Qvality PEP	Qvality q-value	# Protein Groups	# Proteins	# PSMs	Master Protein Accessions	Positions in Master Proteins	Modifications in Master Proteins	# Missed Cleavages	Theo. MH+ [Da]	# Razor Quan Results	Abundance Ratio: (F4) / (F3)	Abundance Ratio Adj. P-Value: (F4) / (F3)	Abundance Ratio Variability [%]: (F4) / (F3)	Abundances (Grouped): F4	Abundances (Grouped): F3	Quan Info	Found in Sample: [S4] F4: Sample	Found in Sample: [S3] F3: Sample	Confidence (by Search Engine): Sequest HT	Percolator q-Value (by Search Engine): Sequest HT	Percolator PEP (by Search Engine): Sequest HT	XCorr (by Search Engine): Sequest HT	Top Apex RT [min]	Sequence in Protein	Positions in Proteins	Quan Usage	Quan Ratio Usage
[K].SSGFGLIYDTVESAK.[K]		FALSE	0.000432742	0.000572698	1	1	7	Q9SS17	Q9SS17 [71-85]		0	1573.77	0	2.762	0.963438	0	37048.5	13415.9		High	High	High	0.0001305	8.374e-05	4.71	146.9	K.SSGFGLIYDTVESAK.K	[71-85]	Used	Used
[K].DPNAIFVFK.[F]		FALSE	0.00176715	0.000987479	1	1	6	Q9SS17	Q9SS17 [53-61]		0	1050.56	0	100	5.76991e-17		38759.9			High	Not Found	High	0.0001991	0.0003518	1.77	132.83	K.DPNAIFVFK.F	[53-61]	Used	Used
[R].KQFVIDVLHPGR.[A]		FALSE	0.00407435	0.00166669	1	2	3	Q9SS17	Q9SS17 [22-33]		1	1408.81	0	1.231	0.604034	0	21019.1	17075.3		High	High	High	0.0003407	0.0008405	2.49	110.86	R.KQFVIDVLHPGR.A	[22-33]	Used	Used
Q9C9C4	Enolase 1, chloroplastic OS=Arabidopsis thaliana OX=3702 GN=ENO1 PE=1 SV=1	0	FALSE	27.703	20	8	22	8	477	51.4	6.13	51.79	8	0	3.289	0.874367	33.25	354708	167013	High	High	1		1.71765	-0.517064
Annotated Sequence	Modifications	Contaminant	Qvality PEP	Qvality q-value	# Protein Groups	# Proteins	# PSMs	Master Protein Accessions	Positions in Master Proteins	Modifications in Master Proteins	# Missed Cleavages	Theo. MH+ [Da]	# Razor Quan Results	Abundance Ratio: (F4) / (F3)	Abundance Ratio Adj. P-Value: (F4) / (F3)	Abundance Ratio Variability [%]: (F4) / (F3)	Abundances (Grouped): F4	Abundances (Grouped): F3	Quan Info	Found in Sample: [S4] F4: Sample	Found in Sample: [S3] F3: Sample	Confidence (by Search Engine): Sequest HT	Percolator q-Value (by Search Engine): Sequest HT	Percolator PEP (by Search Engine): Sequest HT	XCorr (by Search Engine): Sequest HT	Top Apex RT [min]	Sequence in Protein	Positions in Proteins	Quan Usage	Quan Ratio Usage
[R].IAEGYEMASR.[V]		FALSE	0.000562058	0.000572698	1	1	3	O04450	O04450 [129-138]		0	1126.52	0	1.945	0.925353	0	29245.3	15035.8		High	High	High	0.0001305	0.0001091	2.91	66.53	R.IAEGYEMASR.V	[129-138]	Used	Used
Q94EG6	Uncharacterized protein At5g02240 OS=Arabidopsis thaliana OX=3702 GN=At5g02240 PE=1 SV=1	0	FALSE	43.507	44	8	29	8	253	27.1	6.62	88.86	8	0	3.106	0.904944	33.5	957043	239519	High	High	1		1.63506	-0.492201
Annotated Sequence	Modifications	Contaminant	Qvality PEP	Qvality q-value	# Protein Groups	# Proteins	# PSMs	Master Protein Accessions	Positions in Master Proteins	Modifications in Master Proteins	# Missed Cleavages	Theo. MH+ [Da]	# Razor Quan Results	Abundance Ratio: (F4) / (F3)	Abundance Ratio Adj. P-Value: (F4) / (F3)	Abundance Ratio Variability [%]: (F4) / (F3)	Abundances (Grouped): F4	Abundances (Grouped): F3	Quan Info	Found in Sample: [S4] F4: Sample	Found in Sample: [S3] F3: Sample	Confidence (by Search Engine): Sequest HT	Percolator q-Value (by Search Engine): Sequest HT	Percolator PEP (by Search Engine): Sequest HT	XCorr (by Search Engine): Sequest HT	Top Apex RT [min]	Sequence in Protein	Positions in Proteins	Quan Usage	Quan Ratio Usage
[K].YETEPSHDWTTLIANK.[N]		FALSE	0.00689336	0.00166669	1	1	1	P42770	P42770 [166-181]		0	1904.9	0	2.043	0.939328	0	24456.8	11972.7		High	Peak Found	High	0.0003948	0.001454	2.39	117.38	K.YETEPSHDWTTLIANK.N	[166-181]	Used	Used
Q9FG31	Late embryogenesis abundant protein 46 OS=Arabidopsis thaliana OX=3702 GN=LEA46 PE=2 SV=1	0	FALSE	42.12	49	8	51	8	158	16.2	9.44	167.8	8	0	3.032	0.919015	62.73	5.56896e+06	1.44928e+06	High	High	1	Acetyl [N-Term]	1.60027	-0.481729
Annotated Sequence	Modifications	Contaminant	Qvality PEP	Qvality q-value	# Protein Groups	# Proteins	# PSMs	Master Protein Accessions	Positions in Master Proteins	Modifications in Master Proteins	# Missed Cleavages	Theo. MH+ [Da]	# Razor Quan Results	Abundance Ratio: (F4) / (F3)	Abundance Ratio Adj. P-Value: (F4) / (F3)	Abundance Ratio Variability [%]: (F4) / (F3)	Abundances (Grouped): F4	Abundances (Grouped): F3	Quan Info	Found in Sample: [S4] F4: Sample	Found in Sample: [S3] F3: Sample	Confidence (by Search Engine): Sequest HT	Percolator q-Value (by Search Engine): Sequest HT	Percolator PEP (by Search Engine): Sequest HT	XCorr (by Search Engine): Sequest HT	Top Apex RT [min]	Sequence in Protein	Positions in Proteins	Quan Usage	Quan Ratio Usage
[K].LAANAFLAQR.[I]		FALSE	0.00119763	0.000987479	1	4	1	Q9FM01	Q9FM01 [217-226]		0	1074.61	0	2.14	0.945434	0	15362.5	7178.72		High	Peak Found	High	0.0001991	0.0002357	2.66	99.43	K.LAANAFLAQR.I	[217-226]	Used	Used
Q9FKK7	Xylose isomerase OS=Arabidopsis thaliana OX=3702 GN=XYLA PE=2 SV=2	0	FALSE	24.259	21	8	18	8	477	53.7	5.87	44.36	8	0	2.966	0.92429	71.93	249192	79635.4	High	High	1		1.56852	-0.472171
Annotated Sequence	Modifications	Contaminant	Qvality PEP	Qvality q-value	# Protein Groups	# Proteins	# PSMs	Master Protein Accessions	Positions in Master Proteins	Modifications in Master Proteins	# Missed Cleavages	Theo. MH+ [Da]	# Razor Quan Results	Abundance Ratio: (F4) / (F3)	Abundance Ratio Adj. P-Value: (F4) / (F3)	Abundance Ratio Variability [%]: (F4) / (F3)	Abundances (Grouped): F4	Abundances (Grouped): F3	Quan Info	Found in Sample: [S4] F4: Sample	Found in Sample: [S3] F3: Sample	Confidence (by Search Engine): Sequest HT	Percolator q-Value (by Search Engine): Sequest HT	Percolator PEP (by Search Engine): Sequest HT	XCorr (by Search Engine): Sequest HT	Top Apex RT [min]	Sequence in Protein	Positions in Proteins	Quan Usage	Quan Ratio Usage
[K].SALSNYSLAAR.[S]		FALSE	0.00169148	0.000987479	1	1	1	Q949Y0	Q949Y0 [130-140]		0	1152.6	0	2.164	0.948004	0	16166	7472.14		Peak Found	High	High	0.0001991	0.0003365	2.96	89.17	K.SALSNYSLAAR.S	[130-140]	Used	Used
P42645	14-3-3-like protein GF14 upsilon OS=Arabidopsis thaliana OX=3702 GN=GRF5 PE=1 SV=2	0	FALSE	29.141	30	8	28	4	268	30.2	4.81	85.79	8	4	2.944	0.926985	111.76	342091	209960	High	High	1		1.55778	-0.468938
Annotated Sequence	Modifications	Contaminant	Qvality PEP	Qvality q-value	# Protein Groups	# Proteins	# PSMs	Master Protein Accessions	Positions in Master Proteins	Modifications in Master Proteins	# Missed Cleavages	Theo. MH+ [Da]	# Razor Quan Results	Abundance Ratio: (F4) / (F3)	Abundance Ratio Adj. P-Value: (F4) / (F3)	Abundance Ratio Variability [%]: (F4) / (F3)	Abundances (Grouped): F4	Abundances (Grouped): F3	Quan Info	Found in Sample: [S4] F4: Sample	Found in Sample: [S3] F3: Sample	Confidence (by Search Engine): Sequest HT	Percolator q-Value (by Search Engine): Sequest HT	Percolator PEP (by Search Engine): Sequest HT	XCorr (by Search Engine): Sequest HT	Top Apex RT [min]	Sequence in Protein	Positions in Proteins	Quan Usage	Quan Ratio Usage
[K].NTADTTIYSIEK.[S]		FALSE	0.000200914	0.000572698	1	1	2	Q9LDZ0	Q9LDZ0 [586-597]		0	1355.67	0	25.357	0.00808787	0	1.09706e+06	43264.3		High	High	High	0.0001305	3.831e-05	2.91	89.38	K.NTADTTIYSIEK.S	[586-597]	Used	Used
[R].IINEPTAAALSYGMTNK.[E]		FALSE	9.14923e-05	0.000572698	1	1	1	Q9LDZ0	Q9LDZ0 [223-239]		0	1793.91	0	3.969	0.838352	0	25056.5	6312.74		High	Peak Found	High	0.0001305	1.724e-05	4.42	116.13	R.IINEPTAAALSYGMTNK.E	[223-239]	Used	Used
[K].IGEHMSGGSGGGSAPGGGSEGGSDQAPEAEYEEVKK.[-]	1xDeamidated [Q25]	FALSE	5.1282e-08	0.000572698	1	1	1	Q9LDZ0	Q9LDZ0 [647-682]		1	3406.46	0	100	5.76991e-17		32179.8			High	Not Found	High	0.0001305	8.618e-09	7.8	75.93	K.IGEHMSGGSGGGSAPGGGSEGGSDQAPEAEYEEVKK.-	[647-682]	Used	Used
[K].IGEHMSGGSGGGSAPGGGSEGGSDQAPEAEYEEVKK.[-]		FALSE	2.56793e-07	0.000572698	1	1	1	Q9LDZ0	Q9LDZ0 [647-682]		1	3405.48	0						No Quan Values	High	Not Found	High	0.0001305	1.763e-07	7.41		K.IGEHMSGGSGGGSAPGGGSEGGSDQAPEAEYEEVKK.-	[647-682]	Not Used	Not Used
[K].EIEDAVADLR.[S]		FALSE	0.00117832	0.000987479	1	1	1	Q9LDZ0	Q9LDZ0 [613-622]		0	1130.57	0	5.282	0.558147	0	56308.3	10659.5		High	Peak Found	High	0.0001991	0.0002322	3.09	99.12	K.EIEDAVADLR.S	[613-622]	Used	Used
[K].VQSIVAEIFGK.[S]		FALSE	0.0026272	0.000987479	1	1	3	Q9LDZ0	Q9LDZ0 [398-408]		0	1190.68	0	1.191	0.594951	0	28260.8	23736.3		High	High	High	0.0001991	0.0005318	2.18	156.58	K.VQSIVAEIFGK.S	[398-408]	Used	Used
[K].AVVTVPAYFNDAQR.[Q]		FALSE	0.00741545	0.00166669	1	2	2	Q9LDZ0	Q9LDZ0 [193-206]		0	1550.8	0	1.888	0.934169	0	43791.5	23199.2		High	High	High	0.0003948	0.001563	1.79	118.48	K.AVVTVPAYFNDAQR.Q	[193-206]	Used	Used
[K].GELLVGTPAK.[R]		FALSE	0.00961636	0.00190722	1	2	1	Q9LDZ0	Q9LDZ0 [101-110]		0	984.572	0	100	5.76991e-17		71788.3			High	Not Found	High	0.0004264	0.002054	2.63	75.21	K.GELLVGTPAK.R	[101-110]	Used	Used
[R].SSGGLSEDDIQK.[M]		FALSE	0.0212918	0.00332708	1	1	1	Q9LDZ0	Q9LDZ0 [552-563]		0	1235.58	0	0.927	0.440486	0	30589	32986.1		Peak Found	High	High	0.0006776	0.004702	3.68	58.61	R.SSGGLSEDDIQK.M	[552-563]	Used	Used
[K].ETAEAYLGK.[SK]		FALSE	0.102557	0.00791917	3	4	3	Q9LDZ0; Q39043; Q9LKR3	Q9LDZ0 [180-188]; Q39043 [161-169]; Q9LKR3 [161-169]		0	981.489	0	100	5.76991e-17		48598.9		Shared	High	Not Found	High	0.002084	0.02292	2.12	67.58	K.ETAEAYLGK.S	[180-188]	Not Used	Not Used
F4IW47	Transketolase-2, chloroplastic OS=Arabidopsis thaliana OX=3702 GN=TKL-2 PE=1 SV=1	0	FALSE	23.089	12	8	30	4	741	79.9	6.58	84.39	8	4	2.736	0.957777	30.82	413573	169347	High	High	1		1.45207	-0.437116
Annotated Sequence	Modifications	Contaminant	Qvality PEP	Qvality q-value	# Protein Groups	# Proteins	# PSMs	Master Protein Accessions	Positions in Master Proteins	Modifications in Master Proteins	# Missed Cleavages	Theo. MH+ [Da]	# Razor Quan Results	Abundance Ratio: (F4) / (F3)	Abundance Ratio Adj. P-Value: (F4) / (F3)	Abundance Ratio Variability [%]: (F4) / (F3)	Abundances (Grouped): F4	Abundances (Grouped): F3	Quan Info	Found in Sample: [S4] F4: Sample	Found in Sample: [S3] F3: Sample	Confidence (by Search Engine): Sequest HT	Percolator q-Value (by Search Engine): Sequest HT	Percolator PEP (by Search Engine): Sequest HT	XCorr (by Search Engine): Sequest HT	Top Apex RT [min]	Sequence in Protein	Positions in Proteins	Quan Usage	Quan Ratio Usage
[K].LSSDPTTTSQLVANEPASFTGSEVR.[M]		FALSE	2.63398e-05	0.000572698	1	1	2	Q42290	Q42290 [303-327]		0	2594.26	0	100	5.76991e-17		21829.5			High	Not Found	High	0.0001305	6.689e-05	3.05	116.27	K.LSSDPTTTSQLVANEPASFTGSEVR.M	[303-327]	Used	Used
[K].SSLLLHMDGTSPIAEDIGR.[Q]		FALSE	0.0014188	0.000987479	1	1	3	Q42290	Q42290 [448-466]		0	2012.01	0	2.26	0.977289	0	25465.7	11266.4		High	High	High	0.0001991	0.0002809	2.44	134.36	K.SSLLLHMDGTSPIAEDIGR.Q	[448-466]	Used	Used
[R].RIPTAELFAR.[I]		FALSE	0.0193042	0.0029934	1	1	1	Q42290	Q42290 [474-483]		1	1173.67	0	100	5.76991e-17		23420			High	Not Found	High	0.0006192	0.004258	2.03	102.41	R.RIPTAELFAR.I	[474-483]	Used	Used
P41377	Eukaryotic initiation factor 4A-2 OS=Arabidopsis thaliana OX=3702 GN=TIF4A-2 PE=1 SV=1	0	FALSE	27.281	19	8	20	8	412	46.7	5.68	59.12	8	0	2.682	0.96749	81.87	408454	167394	High	High	1		1.42331	-0.428459
Annotated Sequence	Modifications	Contaminant	Qvality PEP	Qvality q-value	# Protein Groups	# Proteins	# PSMs	Master Protein Accessions	Positions in Master Proteins	Modifications in Master Proteins	# Missed Cleavages	Theo. MH+ [Da]	# Razor Quan Results	Abundance Ratio: (F4) / (F3)	Abundance Ratio Adj. P-Value: (F4) / (F3)	Abundance Ratio Variability [%]: (F4) / (F3)	Abundances (Grouped): F4	Abundances (Grouped): F3	Quan Info	Found in Sample: [S4] F4: Sample	Found in Sample: [S3] F3: Sample	Confidence (by Search Engine): Sequest HT	Percolator q-Value (by Search Engine): Sequest HT	Percolator PEP (by Search Engine): Sequest HT	XCorr (by Search Engine): Sequest HT	Top Apex RT [min]	Sequence in Protein	Positions in Proteins	Quan Usage	Quan Ratio Usage
[K].VFAETLLTNPGASK.[T]		FALSE	2.13375e-05	0.000572698	1	1	2	Q9FM65	Q9FM65 [198-211]		0	1447.78	0	1.652	0.919939	0	67078.8	40597		High	High	High	0.0001305	3.927e-06	4.27	116.96	K.VFAETLLTNPGASK.T	[198-211]	Used	Used
[K].VGFGPDGGDLSSFFVK.[S]		FALSE	0.00011239	0.000572698	1	1	4	Q9FM65	Q9FM65 [137-152]		0	1628.8	0	3.237	0.929173	0	22288.6	6886.04		High	Peak Found	High	0.0001305	2.126e-05	2.3	161.57	K.VGFGPDGGDLSSFFVK.S	[137-152]	Used	Used
[K].SNNGPMNTLATDGANKFELTVQNDGEK.[V]	1xDeamidated [N2]	FALSE	0.136787	0.00875015	1	1	1	Q9FM65	Q9FM65 [266-292]		1	2866.32	0						No Quan Values	High	Not Found	High	0.002458	0.03053	3.52		K.SNNGPMNTLATDGANKFELTVQNDGEK.V	[266-292]	Not Used	Not Used
Q9LJ97	Late embryogenesis abundant protein 31 OS=Arabidopsis thaliana OX=3702 GN=RAB28 PE=1 SV=1	0	FALSE	43.638	34	8	34	8	262	26.7	4.84	104.42	8	0	2.314	0.984396	33.24	1.62272e+06	777402	High	High	1		1.21039	-0.364363
Annotated Sequence	Modifications	Contaminant	Qvality PEP	Qvality q-value	# Protein Groups	# Proteins	# PSMs	Master Protein Accessions	Positions in Master Proteins	Modifications in Master Proteins	# Missed Cleavages	Theo. MH+ [Da]	# Razor Quan Results	Abundance Ratio: (F4) / (F3)	Abundance Ratio Adj. P-Value: (F4) / (F3)	Abundance Ratio Variability [%]: (F4) / (F3)	Abundances (Grouped): F4	Abundances (Grouped): F3	Quan Info	Found in Sample: [S4] F4: Sample	Found in Sample: [S3] F3: Sample	Confidence (by Search Engine): Sequest HT	Percolator q-Value (by Search Engine): Sequest HT	Percolator PEP (by Search Engine): Sequest HT	XCorr (by Search Engine): Sequest HT	Top Apex RT [min]	Sequence in Protein	Positions in Proteins	Quan Usage	Quan Ratio Usage
[K].GLTPSQIGVILR.[D]		FALSE	0.00182425	0.000987479	1	2	3	P59223	P59223 [44-55]		0	1253.76	0	2.515	0.99159	0	44600.7	17736		High	High	High	0.0001991	0.0003631	1.54	131.62	K.GLTPSQIGVILR.D	[44-55]	Used	Used
[R].LILVESR.[I]		FALSE	0.0466447	0.00486181	1	2	4	P59223	P59223 [115-121]		0	829.514	0	2.418	0.995116	0	51888.3	21456.7		High	High	High	0.001076	0.01065	1.74	80.61	R.LILVESR.I	[115-121]	Used	Used
Q0WLB5	Clathrin heavy chain 2 OS=Arabidopsis thaliana OX=3702 GN=CHC2 PE=1 SV=1	0	FALSE	28.594	6	8	16	2	1703	193.1	5.38	41.91	8	4	2.512	0.999265	35.99	203104	66836.6	High	Peak Found	1		1.32884	-0.40002
Annotated Sequence	Modifications	Contaminant	Qvality PEP	Qvality q-value	# Protein Groups	# Proteins	# PSMs	Master Protein Accessions	Positions in Master Proteins	Modifications in Master Proteins	# Missed Cleavages	Theo. MH+ [Da]	# Razor Quan Results	Abundance Ratio: (F4) / (F3)	Abundance Ratio Adj. P-Value: (F4) / (F3)	Abundance Ratio Variability [%]: (F4) / (F3)	Abundances (Grouped): F4	Abundances (Grouped): F3	Quan Info	Found in Sample: [S4] F4: Sample	Found in Sample: [S3] F3: Sample	Confidence (by Search Engine): Sequest HT	Percolator q-Value (by Search Engine): Sequest HT	Percolator PEP (by Search Engine): Sequest HT	XCorr (by Search Engine): Sequest HT	Top Apex RT [min]	Sequence in Protein	Positions in Proteins	Quan Usage	Quan Ratio Usage
[R].NKEFPWGPDGLFEVK.[H]		FALSE	0.00375785	0.00166669	1	1	1	Q9T070	Q9T070 [83-97]		1	1762.88	0	0.908	0.428293	0	3789.08	4173.05		Peak Found	High	High	0.0003407	0.0007741	1.81	154.45	R.NKEFPWGPDGLFEVK.H	[83-97]	Used	Used
P15457	2S seed storage protein 1 OS=Arabidopsis thaliana OX=3702 GN=AT2S1 PE=1 SV=1	0	FALSE	56.163	41	7	217	7	164	19	5.91	596.27	7	0	0.895	0.174274	38.42	1.95985e+07	2.54507e+07	High	High	1		-0.16004	0.048177
Annotated Sequence	Modifications	Contaminant	Qvality PEP	Qvality q-value	# Protein Groups	# Proteins	# PSMs	Master Protein Accessions	Positions in Master Proteins	Modifications in Master Proteins	# Missed Cleavages	Theo. MH+ [Da]	# Razor Quan Results	Abundance Ratio: (F4) / (F3)	Abundance Ratio Adj. P-Value: (F4) / (F3)	Abundance Ratio Variability [%]: (F4) / (F3)	Abundances (Grouped): F4	Abundances (Grouped): F3	Quan Info	Found in Sample: [S4] F4: Sample	Found in Sample: [S3] F3: Sample	Confidence (by Search Engine): Sequest HT	Percolator q-Value (by Search Engine): Sequest HT	Percolator PEP (by Search Engine): Sequest HT	XCorr (by Search Engine): Sequest HT	Top Apex RT [min]	Sequence in Protein	Positions in Proteins	Quan Usage	Quan Ratio Usage
[R].LEEVAEIAR.[E]		FALSE	0.00058405	0.000572698	1	1	8	P0DKC6	P0DKC6 [84-92]		0	1029.56	0	1.955	0.96464	0	603120	308473		High	High	High	0.0001305	0.0001136	3.73	79.28	R.LEEVAEIAR.E	[84-92]	Used	Used
[R].LDHLVNNAGMTQISMFENIEDITR.[T]	2xOxidation [M10; M15]	FALSE	0.000133876	0.000572698	1	1	6	P0DKC6	P0DKC6 [126-149]		0	2793.32	0	2.451	0.997269	0	40543.2	16539.2		High	High	High	0.0001305	2.537e-05	4.72	134.47	R.LDHLVNNAGMTQISMFENIEDITR.T	[126-149]	Used	Used
[R].LDHLVNNAGMTQISMFENIEDITR.[T]	1xDeamidated [Q/N]; 1xOxidation [M]	FALSE	1.40018e-05	0.000572698	1	1	9	P0DKC6	P0DKC6 [126-149]		0	2778.31	0	0.01	5.76991e-17			4872.85		High	High	High	0.0001305	2.563e-06	5.31	166.01	R.LDHLVNNAGMTQISMFENIEDITR.T	[126-149]	Used	Used
[R].LDHLVNNAGMTQISMFENIEDITR.[T]	1xOxidation [M]	FALSE	3.43084e-07	0.000572698	1	1	30	P0DKC6	P0DKC6 [126-149]		0	2777.32	0	1.378	0.966045	0	202198	146753		High	High	High	0.0001305	5.938e-08	5.55	153.77	R.LDHLVNNAGMTQISMFENIEDITR.T	[126-149]	Used	Used
[R].LDHLVNNAGMTQISMFENIEDITR.[T]	1xDeamidated [N/Q]	FALSE	2.22723e-08	0.000572698	1	1	17	P0DKC6	P0DKC6 [126-149]		0	2762.31	0	0.941	0.870291	0	105748	112400		High	High	High	0.0001305	3.696e-09	6.49	166.15	R.LDHLVNNAGMTQISMFENIEDITR.T	[126-149]	Used	Used
[R].LDHLVNNAGMTQISMFENIEDITR.[T]		FALSE	5.70864e-07	0.000572698	1	1	17	P0DKC6	P0DKC6 [126-149]		0	2761.33	0	1.257	0.944245	0	535792	426373		High	High	High	0.0001305	9.948e-08	5.17	163.24	R.LDHLVNNAGMTQISMFENIEDITR.T	[126-149]	Used	Used
[R].IVDDTITHFGR.[L]		FALSE	0.000370534	0.000572698	1	1	10	P0DKC6	P0DKC6 [115-125]		0	1273.65	0	0.879	0.841733	0	1.34559e+06	1.53145e+06		High	High	High	0.0001305	7.133e-05	4.3	88.49	R.IVDDTITHFGR.L	[115-125]	Used	Used
[K].IVAMSSSAAWLTAPR.[M]	1xOxidation [M4]	FALSE	8.4557e-05	0.000572698	1	1	8	P0DKC6	P0DKC6 [179-193]		0	1576.82	0	1.474	0.942221	0	102229	69331.9		High	High	High	0.0001305	1.59e-05	3.55	112.79	K.IVAMSSSAAWLTAPR.M	[179-193]	Used	Used
[K].NRLEEVAEIAR.[E]		FALSE	4.03105e-05	0.000572698	1	1	17	P0DKC6	P0DKC6 [82-92]		1	1299.7	0	0.918	0.862316	0	730306	795264		High	High	High	0.0001305	7.503e-06	3.43	93.68	K.NRLEEVAEIAR.E	[82-92]	Used	Used
[K].IVAMSSSAAWLTAPR.[M]		FALSE	2.08398e-06	0.000572698	1	1	31	P0DKC6	P0DKC6 [179-193]		0	1560.82	0	0.551	0.57221	0	391826	710796		High	High	High	0.0001305	3.715e-07	5.39	130.45	K.IVAMSSSAAWLTAPR.M	[179-193]	Used	Used
[R].LLYMTGTGMSEDTALNKR.[I]		FALSE	3.00452e-05	0.000572698	1	1	8	P0DKC6	P0DKC6 [308-325]		1	2000.98	0	0.238	0.114354	0	165732	695238		High	High	High	0.0001305	5.568e-06	4.77	110.88	R.LLYMTGTGMSEDTALNKR.I	[308-325]	Used	Used
[R].LLYMTGTGMSEDTALNK.[R]		FALSE	2.8882e-05	0.000572698	1	1	1	P0DKC6	P0DKC6 [308-324]		0	1844.88	0	2.763	0.963527	0	40821.1	14773.4		High	Peak Found	High	0.0001305	5.344e-06	5.15	119.57	R.LLYMTGTGMSEDTALNK.R	[308-324]	Used	Used
[R].RIVDDTITHFGR.[L]		FALSE	0.000782174	0.000572698	1	1	5	P0DKC6	P0DKC6 [114-125]		1	1429.75	0	0.349	0.0782829	0	37426.4	107331		High	High	High	0.0001305	0.0001526	2.78	86.26	R.RIVDDTITHFGR.L	[114-125]	Used	Used
[K].YFSGEGELIVNQDMR.[D]		FALSE	3.16221e-06	0.000572698	1	1	59	P0DKC6	P0DKC6 [238-252]		0	1757.82	0	0.864	0.837035	0	342023	395925		High	High	High	0.0001305	5.657e-07	5.05	121.69	K.YFSGEGELIVNQDMR.D	[238-252]	Used	Used
[R].DVQVGPFPVASASGCAK.[S]	1xCarbamidomethyl [C15]	FALSE	3.54955e-05	0.000572698	1	1	6	P0DKC6	P0DKC6 [253-269]		0	1689.83	0	0.648	0.675331	0	171481	264817		High	High	High	0.0001305	6.598e-06	4.11	113.61	R.DVQVGPFPVASASGCAK.S	[253-269]	Used	Used
[K].YFSGEGELIVNQDMR.[D]	1xOxidation [M14]	FALSE	7.12766e-05	0.000572698	1	1	10	P0DKC6	P0DKC6 [238-252]		0	1773.81	0	3.657	0.841733	0	88404.1	24176.7		High	High	High	0.0001305	1.341e-05	4.43	108.82	K.YFSGEGELIVNQDMR.D	[238-252]	Used	Used
[K].AVLDTNFWGSVYTTR.[A]	1xDeamidated [N6]	FALSE	3.97298e-06	0.000572698	1	1	7	P0DKC6	P0DKC6 [152-166]		0	1730.84	0	100	5.76991e-17		85095.9			High	High	High	0.0001305	7.149e-07	5.68	150.69	K.AVLDTNFWGSVYTTR.A	[152-166]	Used	Used
[K].AVLDTNFWGSVYTTR.[A]		FALSE	2.47308e-06	0.000572698	1	1	18	P0DKC6	P0DKC6 [152-166]		0	1729.85	0	0.434	0.403678	0	112327	259032		High	High	High	0.0001305	4.417e-07	5.11	150.88	K.AVLDTNFWGSVYTTR.A	[152-166]	Used	Used
[R].ELGSPNVVTVHADVSKPDDCRR.[I]	1xCarbamidomethyl [C20]	FALSE	7.88337e-05	0.000572698	1	1	5	P0DKC6	P0DKC6 [93-114]		1	2451.2	0	0.01	5.76991e-17			60905.8		Not Found	High	High	0.0001305	1.484e-05	2.62	77.9	R.ELGSPNVVTVHADVSKPDDCRR.I	[93-114]	Used	Used
[K].AALLSFFETMR.[I]		FALSE	0.000293302	0.000572698	1	1	16	P0DKC6	P0DKC6 [202-212]		0	1285.66	0	1.624	0.999906	0	437649	269455		High	High	High	0.0001305	5.627e-05	3.25	173.94	K.AALLSFFETMR.I	[202-212]	Used	Used
[K].AALLSFFETMR.[I]	1xOxidation [M10]	FALSE	0.000350292	0.000572698	1	1	17	P0DKC6	P0DKC6 [202-212]		0	1301.66	0	1.369	0.863002	0	70629.1	51578.6		High	High	High	0.0001305	6.759e-05	3.54	155.07	K.AALLSFFETMR.I	[202-212]	Used	Used
[K].NRLEEVAEIAR.[E]	1xDeamidated [N1]	FALSE	0.00124214	0.000987479	1	1	4	P0DKC6	P0DKC6 [82-92]		1	1300.69	0	0.817	0.331029	0	29360.2	35916.6		Peak Found	High	High	0.0001991	0.0002445	3.91	105.35	K.NRLEEVAEIAR.E	[82-92]	Used	Used
[R].TKAVLDTNFWGSVYTTR.[A]		FALSE	0.00121723	0.000987479	1	1	1	P0DKC6	P0DKC6 [150-166]		1	1959	0	0.01	5.76991e-17			31212.9		Not Found	High	High	0.0001991	0.0002397	2.38	136.26	R.TKAVLDTNFWGSVYTTR.A	[150-166]	Used	Used
[R].STLYPESIR.[T]		FALSE	0.00237945	0.000987479	1	1	9	P0DKC6	P0DKC6 [334-342]		0	1065.56	0	1.327	0.963438	0	2.59341e+06	1.95411e+06		High	High	High	0.0001991	0.0004804	2.47	84.67	R.STLYPESIR.T	[334-342]	Used	Used
[R].GACLALTAR.[R]	1xCarbamidomethyl [C3]	FALSE	0.00304204	0.00143413	1	1	2	P0DKC6	P0DKC6 [71-79]		0	932.498	0	0.631	0.662139	0	209334	331692		High	High	High	0.0002813	0.0006196	2.69	73.08	R.GACLALTAR.R	[71-79]	Used	Used
[R].KNRLEEVAEIAR.[E]		FALSE	0.00277702	0.00143413	1	1	5	P0DKC6	P0DKC6 [81-92]		2	1427.8	0	0.01	5.76991e-17			85023.6		Not Found	High	High	0.0002813	0.0005631	2.2	90.42	R.KNRLEEVAEIAR.E	[81-92]	Used	Used
[R].MSFYNASK.[A]	1xDeamidated [N5]	FALSE	0.00316518	0.00143413	1	1	8	P0DKC6	P0DKC6 [194-201]		0	948.413	0	1.247	0.941925	0	146566	117548		High	High	High	0.0002813	0.0006454	2.8	78.7	R.MSFYNASK.A	[194-201]	Used	Used
[R].IMDIPGVR.[S]	1xOxidation [M2]	FALSE	0.00490666	0.00166669	1	1	25	P0DKC6	P0DKC6 [326-333]		0	916.492	0	1.334	0.964018	0	119200	89372.6		High	High	High	0.0003407	0.00102	2.12	102.57	R.IMDIPGVR.S	[326-333]	Used	Used
[R].IMDIPGVR.[S]		FALSE	0.00345474	0.00166669	1	1	15	P0DKC6	P0DKC6 [326-333]		0	900.497	0	1.355	0.96464	0	1.54245e+06	1.13799e+06		High	High	High	0.0003407	0.0007092	2.24	103.92	R.IMDIPGVR.S	[326-333]	Used	Used
[R].AALPYLR.[Q]		FALSE	0.00608345	0.00166669	1	1	5	P0DKC6	P0DKC6 [167-173]		0	803.477	0	1.886	0.969436	0	1.2011e+06	636685		High	High	High	0.0003948	0.001276	1.82	96.59	R.AALPYLR.Q	[167-173]	Used	Used
[R].YVTEPSWFK.[V]		FALSE	0.01066	0.00190722	1	1	9	P0DKC6	P0DKC6 [281-289]		0	1156.57	0	1.025	0.902941	0	798083	778951		High	High	High	0.0004264	0.002285	2.4	119.36	R.YVTEPSWFK.V	[281-289]	Used	Used
[R].MSFYNASK.[A]		FALSE	0.00961636	0.00190722	1	1	5	P0DKC6	P0DKC6 [194-201]		0	947.429	0	1.014	0.898399	0	1.81616e+06	1791892		High	High	High	0.0004264	0.002051	2.79	72.25	R.MSFYNASK.A	[194-201]	Used	Used
[K].VTYLWK.[V]		FALSE	0.0116057	0.00190722	1	1	5	P0DKC6	P0DKC6 [290-295]		0	809.456	0	1.095	0.923336	0	459902	419880		High	High	High	0.0004264	0.002492	1.87	101.92	K.VTYLWK.V	[290-295]	Used	Used
[K].SIVNGVCR.[K]	1xCarbamidomethyl [C7]; 1xDeamidated [N4]	FALSE	0.0179003	0.0029934	1	1	8	P0DKC6	P0DKC6 [270-277]		0	905.451	0	0.501	0.505802	0	114180	228054		Peak Found	High	High	0.0006192	0.00393	2.41	56	K.SIVNGVCR.K	[270-277]	Used	Used
[R].LLYMTGTGMSEDTALNKR.[I]	1xOxidation [M9]	FALSE	0.0261396	0.00400174	1	1	1	P0DKC6	P0DKC6 [308-325]		1	2016.97	0	1.485	0.863002	0	57056.9	38431.9		High	Peak Found	High	0.0007949	0.00586	2.62	96.16	R.LLYMTGTGMSEDTALNKR.I	[308-325]	Used	Used
[R].QSNGKIVAMSSSAAWLTAPR.[M]	1xDeamidated [Q/N]	FALSE	0.0788778	0.00598748	1	1	3	P0DKC6	P0DKC6 [174-193]		1	2076.05	0	0.01	5.76991e-17			9463.52		Not Found	High	High	0.00163	0.01783	1.52	127.77	R.QSNGKIVAMSSSAAWLTAPR.M	[174-193]	Used	Used
[R].MSFYNASK.[A]	1xOxidation [M1]	FALSE	0.0804789	0.00598748	1	1	1	P0DKC6	P0DKC6 [194-201]		0	963.424	0	1.684	0.964424	0	92969.6	55202.5		Peak Found	High	High	0.00163	0.01823	2.29	55.88	R.MSFYNASK.A	[194-201]	Used	Used
O04151	Calreticulin-1 OS=Arabidopsis thaliana OX=3702 GN=CRT1 PE=1 SV=1	0	FALSE	29.311	28	7	17	7	425	48.5	4.6	52.71	7	0	4.827	0.517072	46.68	338437	74587	High	High	1		2.27113	-0.683677
Annotated Sequence	Modifications	Contaminant	Qvality PEP	Qvality q-value	# Protein Groups	# Proteins	# PSMs	Master Protein Accessions	Positions in Master Proteins	Modifications in Master Proteins	# Missed Cleavages	Theo. MH+ [Da]	# Razor Quan Results	Abundance Ratio: (F4) / (F3)	Abundance Ratio Adj. P-Value: (F4) / (F3)	Abundance Ratio Variability [%]: (F4) / (F3)	Abundances (Grouped): F4	Abundances (Grouped): F3	Quan Info	Found in Sample: [S4] F4: Sample	Found in Sample: [S3] F3: Sample	Confidence (by Search Engine): Sequest HT	Percolator q-Value (by Search Engine): Sequest HT	Percolator PEP (by Search Engine): Sequest HT	XCorr (by Search Engine): Sequest HT	Top Apex RT [min]	Sequence in Protein	Positions in Proteins	Quan Usage	Quan Ratio Usage
[R].FIAPVFADLAK.[K]		FALSE	0.00184612	0.000987479	1	1	4	Q42403	Q42403 [44-54]		0	1191.68	0	2.771	0.946806	0	70367.4	25390.4		High	High	High	0.0001991	0.0003676	1.55	152.55	R.FIAPVFADLAK.K	[44-54]	Used	Used
[K].VQAMPTFIFMK.[E]		FALSE	0.00633042	0.00166669	1	1	2	Q42403	Q42403 [78-88]		0	1312.68	0	4.595	0.657172	0	96333.9	20965		High	High	High	0.0003948	0.001329	2.81	154.72	K.VQAMPTFIFMK.E	[78-88]	Used	Used
[K].EEIIANLEK.[H]		FALSE	0.0291128	0.00462251	1	1	2	Q42403	Q42403 [102-110]		0	1058.57	0	8.482	0.175045	0	52170.9	6150.67		High	Peak Found	High	0.0009067	0.006547	1.82	93.17	K.EEIIANLEK.H	[102-110]	Used	Used
[K].HLDVVFFK.[V]		FALSE	0.0939478	0.00664992	1	1	1	Q42403	Q42403 [56-63]		0	1004.56	0	0.01	5.76991e-17			14004.7		Not Found	High	High	0.001803	0.02112	2.57	120.19	K.HLDVVFFK.V	[56-63]	Used	Used
Q9LU86	Peroxiredoxin Q, chloroplastic OS=Arabidopsis thaliana OX=3702 GN=PRXQ PE=1 SV=1	0	FALSE	26.822	37	7	17	7	216	23.7	9.51	43.98	7	0	1.322	0.585503	79.19	368971	229670	High	High	1		0.402722	-0.121231
Annotated Sequence	Modifications	Contaminant	Qvality PEP	Qvality q-value	# Protein Groups	# Proteins	# PSMs	Master Protein Accessions	Positions in Master Proteins	Modifications in Master Proteins	# Missed Cleavages	Theo. MH+ [Da]	# Razor Quan Results	Abundance Ratio: (F4) / (F3)	Abundance Ratio Adj. P-Value: (F4) / (F3)	Abundance Ratio Variability [%]: (F4) / (F3)	Abundances (Grouped): F4	Abundances (Grouped): F3	Quan Info	Found in Sample: [S4] F4: Sample	Found in Sample: [S3] F3: Sample	Confidence (by Search Engine): Sequest HT	Percolator q-Value (by Search Engine): Sequest HT	Percolator PEP (by Search Engine): Sequest HT	XCorr (by Search Engine): Sequest HT	Top Apex RT [min]	Sequence in Protein	Positions in Proteins	Quan Usage	Quan Ratio Usage
[K].SEVLDFIR.[S]		FALSE	0.00460863	0.00166669	1	1	1	Q93Y35	Q93Y35 [37-44]		0	978.525	0	4.602	0.796414	0	13638.3	2963.52		High	Peak Found	High	0.0003407	0.0009591	1.75	126.07	K.SEVLDFIR.S	[37-44]	Used	Used
P0CJ46	Actin-1 OS=Arabidopsis thaliana OX=3702 GN=ACT1 PE=1 SV=1	0	FALSE	23.001	28	7	24	2	377	41.8	5.49	66.28	7	0	4.14	0.679566	0	47158.8	11391.7	High	Peak Found	1		2.04963	-0.617
Annotated Sequence	Modifications	Contaminant	Qvality PEP	Qvality q-value	# Protein Groups	# Proteins	# PSMs	Master Protein Accessions	Positions in Master Proteins	Modifications in Master Proteins	# Missed Cleavages	Theo. MH+ [Da]	# Razor Quan Results	Abundance Ratio: (F4) / (F3)	Abundance Ratio Adj. P-Value: (F4) / (F3)	Abundance Ratio Variability [%]: (F4) / (F3)	Abundances (Grouped): F4	Abundances (Grouped): F3	Quan Info	Found in Sample: [S4] F4: Sample	Found in Sample: [S3] F3: Sample	Confidence (by Search Engine): Sequest HT	Percolator q-Value (by Search Engine): Sequest HT	Percolator PEP (by Search Engine): Sequest HT	XCorr (by Search Engine): Sequest HT	Top Apex RT [min]	Sequence in Protein	Positions in Proteins	Quan Usage	Quan Ratio Usage
[R].AAVEGNLPVSGQYSPR.[D]		FALSE	5.37832e-06	0.000572698	1	1	3	Q9SH69	Q9SH69 [49-64]		0	1644.83	0	3.98	0.794258	0	43795.3	11003		High	High	High	0.0001305	9.696e-07	4.45	90.59	R.AAVEGNLPVSGQYSPR.D	[49-64]	Used	Used
[K].GFPISVYNR.[T]		FALSE	0.00869348	0.00190722	2	3	1	Q9SH69; Q9FWA3	Q9SH69 [29-37]; Q9FWA3 [28-36]		0	1052.55	0	1.559	0.837035	0	32116.1	20599.8	Shared	High	Peak Found	High	0.0004264	0.001847	1.59	108.35	K.GFPISVYNR.T	[29-37]	Not Used	Not Used
Q03251	Glycine-rich RNA-binding protein 8 OS=Arabidopsis thaliana OX=3702 GN=RBG8 PE=1 SV=1	0	FALSE	30.395	54	7	32	5	169	16.6	5.68	141.04	7	2	1.528	0.735409	63.23	791843	673156	High	High	1		0.611645	-0.184123
Annotated Sequence	Modifications	Contaminant	Qvality PEP	Qvality q-value	# Protein Groups	# Proteins	# PSMs	Master Protein Accessions	Positions in Master Proteins	Modifications in Master Proteins	# Missed Cleavages	Theo. MH+ [Da]	# Razor Quan Results	Abundance Ratio: (F4) / (F3)	Abundance Ratio Adj. P-Value: (F4) / (F3)	Abundance Ratio Variability [%]: (F4) / (F3)	Abundances (Grouped): F4	Abundances (Grouped): F3	Quan Info	Found in Sample: [S4] F4: Sample	Found in Sample: [S3] F3: Sample	Confidence (by Search Engine): Sequest HT	Percolator q-Value (by Search Engine): Sequest HT	Percolator PEP (by Search Engine): Sequest HT	XCorr (by Search Engine): Sequest HT	Top Apex RT [min]	Sequence in Protein	Positions in Proteins	Quan Usage	Quan Ratio Usage
[R].SGGGGGYSGGGGGGYSGGGGGGYER.[R]		FALSE	1.97831e-08	0.000572698	1	1	10	Q03251	Q03251 [103-127]		0	2023.81	0	1.034	0.743175	0	71705.2	69368.8		High	High	High	0.0001305	3.282e-09	7.45	59.16	R.SGGGGGYSGGGGGGYSGGGGGGYER.R	[103-127]	Used	Used
[R].VITVNEAQSR.[G]		FALSE	0.000403928	0.000572698	1	1	13	Q03251	Q03251 [76-85]		0	1116.6	0	0.835	0.824371	0	260488	312032		High	High	High	0.0001305	7.787e-05	3.58	55.83	R.VITVNEAQSR.G	[76-85]	Used	Used
[R].EGGGYGGGDGGSYGGGGGGW.[-]		FALSE	4.2303e-05	0.000572698	1	1	1	Q03251	Q03251 [150-169]		0	1660.63	0	2.09	0.944245	0	25178.1	12047.4		High	Peak Found	High	0.0001305	7.864e-06	5.42	99.9	R.EGGGYGGGDGGSYGGGGGGW.-	[150-169]	Used	Used
[R].GFGFVTFK.[D]		FALSE	0.00207949	0.000987479	2	2	3	Q03251; Q03250	Q03251 [48-55]; Q03250 [50-57]		0	902.477	0	7.442	0.249514	0	35808.8	4811.5	Shared	High	Peak Found	High	0.0001991	0.0004169	2.86	132.04	R.GFGFVTFK.D	[48-55]	Used	Used
[R].DAIEEMNGKELDGR.[V]	1xDeamidated [N7]	FALSE	0.0011452	0.000987479	1	1	1	Q03251	Q03251 [62-75]		1	1577.71	0	2.296	0.993138	0	84112.4	36640		Peak Found	High	High	0.0001991	0.0002254	4.35	83.96	R.DAIEEMNGKELDGR.V	[62-75]	Used	Used
[R].GFGFVTFKDEK.[A]		FALSE	0.0029238	0.00143413	2	2	2	Q03251; Q03250	Q03251 [48-58]; Q03250 [50-60]		1	1274.64	0	0.876	0.621334	0	66602.8	75999.3	Shared	High	High	High	0.0002813	0.0005955	3.27	115.8	R.GFGFVTFKDEK.A	[48-58]	Used	Used
[R].TFSQFGDVIDSK.[I]		FALSE	0.0164326	0.00268212	1	1	2	Q03251	Q03251 [25-36]		0	1343.65	0	1.528	0.993138	0	247947	162257		High	High	High	0.0005646	0.00358	3.31	115.79	R.TFSQFGDVIDSK.I	[25-36]	Used	Used
P33207	3-oxoacyl-[acyl-carrier-protein] reductase, chloroplastic OS=Arabidopsis thaliana OX=3702 GN=At1g24360 PE=1 SV=2	0	FALSE	24.639	21	7	32	7	319	33.5	9.41	75.68	7	0	1.535	0.741391	26.2	301097	177327	High	High	1		0.618239	-0.186108
Annotated Sequence	Modifications	Contaminant	Qvality PEP	Qvality q-value	# Protein Groups	# Proteins	# PSMs	Master Protein Accessions	Positions in Master Proteins	Modifications in Master Proteins	# Missed Cleavages	Theo. MH+ [Da]	# Razor Quan Results	Abundance Ratio: (F4) / (F3)	Abundance Ratio Adj. P-Value: (F4) / (F3)	Abundance Ratio Variability [%]: (F4) / (F3)	Abundances (Grouped): F4	Abundances (Grouped): F3	Quan Info	Found in Sample: [S4] F4: Sample	Found in Sample: [S3] F3: Sample	Confidence (by Search Engine): Sequest HT	Percolator q-Value (by Search Engine): Sequest HT	Percolator PEP (by Search Engine): Sequest HT	XCorr (by Search Engine): Sequest HT	Top Apex RT [min]	Sequence in Protein	Positions in Proteins	Quan Usage	Quan Ratio Usage
[K].HVVGSPVAISWT.[-]		FALSE	0.000601723	0.000572698	1	1	2	O65351	O65351 [746-757]		0	1252.67	0	10.691	0.0809397	0	60624.9	5670.69		High	Peak Found	High	0.0001305	0.0001172	2.25	122.24	K.HVVGSPVAISWT.-	[746-757]	Used	Used
[K].ISVEPAVLNFK.[E]		FALSE	0.00147092	0.000987479	1	1	1	O65351	O65351 [701-711]		0	1216.69	0	4.706	0.675037	0	79441	16880		Peak Found	High	High	0.0001991	0.0002906	2.81	127.6	K.ISVEPAVLNFK.E	[701-711]	Used	Used
[K].SVHPEWSPAAIR.[S]		FALSE	0.00173236	0.000987479	1	1	2	O65351	O65351 [557-568]		0	1349.7	0	3.183	0.925353	0	28658.2	9003.13		High	Peak Found	High	0.0001991	0.0003444	2.94	93.22	K.SVHPEWSPAAIR.S	[557-568]	Used	Used
[R].SALMTTAYK.[T]		FALSE	0.00947753	0.00190722	1	1	3	O65351	O65351 [569-577]		0	985.502	0	2.183	0.997269	0	89030.4	40778.6		High	High	High	0.0004264	0.002022	2.79	71	R.SALMTTAYK.T	[569-577]	Used	Used
P49209	60S ribosomal protein L9-1 OS=Arabidopsis thaliana OX=3702 GN=RPL9B PE=1 SV=3	0	FALSE	34.811	45	7	41	7	194	22	9.45	112.12	7	0	1.569	0.758733	13.96	309535	201728	High	High	1		0.649845	-0.195623
Annotated Sequence	Modifications	Contaminant	Qvality PEP	Qvality q-value	# Protein Groups	# Proteins	# PSMs	Master Protein Accessions	Positions in Master Proteins	Modifications in Master Proteins	# Missed Cleavages	Theo. MH+ [Da]	# Razor Quan Results	Abundance Ratio: (F4) / (F3)	Abundance Ratio Adj. P-Value: (F4) / (F3)	Abundance Ratio Variability [%]: (F4) / (F3)	Abundances (Grouped): F4	Abundances (Grouped): F3	Quan Info	Found in Sample: [S4] F4: Sample	Found in Sample: [S3] F3: Sample	Confidence (by Search Engine): Sequest HT	Percolator q-Value (by Search Engine): Sequest HT	Percolator PEP (by Search Engine): Sequest HT	XCorr (by Search Engine): Sequest HT	Top Apex RT [min]	Sequence in Protein	Positions in Proteins	Quan Usage	Quan Ratio Usage
[R].VIEIQAETPVSEAVK.[I]		FALSE	0.000375365	0.000572698	1	1	2	Q9CAR3	Q9CAR3 [60-74]		0	1612.88	0	1.708	0.874632	0	25773.7	15089.8		Peak Found	High	High	0.0001305	7.247e-05	3.42	108.39	R.VIEIQAETPVSEAVK.I	[60-74]	Used	Used
[K].DFYEVILQEEPFK.[S]		FALSE	0.00375785	0.00166669	1	1	1	Q9CAR3	Q9CAR3 [192-204]		0	1656.82	0						No Quan Values	High	Not Found	High	0.0003407	0.0007723	2.57		K.DFYEVILQEEPFK.S	[192-204]	Not Used	Not Used
[K].IVGNISMR.[D]		FALSE	0.0227431	0.00332708	1	1	1	Q9CAR3	Q9CAR3 [331-338]		0	889.492	0						No Quan Values	High	Not Found	High	0.0006776	0.005055	1.97		K.IVGNISMR.D	[331-338]	Not Used	Not Used
Q9SLA8	Enoyl-[acyl-carrier-protein] reductase [NADH], chloroplastic OS=Arabidopsis thaliana OX=3702 GN=MOD1 PE=1 SV=1	0	FALSE	29.609	24	7	23	7	390	41.2	9	61.22	7	0	3.561	0.838229	49.71	536748	152266	High	High	1		1.83228	-0.551572
Annotated Sequence	Modifications	Contaminant	Qvality PEP	Qvality q-value	# Protein Groups	# Proteins	# PSMs	Master Protein Accessions	Positions in Master Proteins	Modifications in Master Proteins	# Missed Cleavages	Theo. MH+ [Da]	# Razor Quan Results	Abundance Ratio: (F4) / (F3)	Abundance Ratio Adj. P-Value: (F4) / (F3)	Abundance Ratio Variability [%]: (F4) / (F3)	Abundances (Grouped): F4	Abundances (Grouped): F3	Quan Info	Found in Sample: [S4] F4: Sample	Found in Sample: [S3] F3: Sample	Confidence (by Search Engine): Sequest HT	Percolator q-Value (by Search Engine): Sequest HT	Percolator PEP (by Search Engine): Sequest HT	XCorr (by Search Engine): Sequest HT	Top Apex RT [min]	Sequence in Protein	Positions in Proteins	Quan Usage	Quan Ratio Usage
[R].SIVGATLEVIQK.[K]		FALSE	0.00156809	0.000987479	1	2	4	P38666	P38666 [84-95]		0	1257.74	0	1.754	0.925353	0	55443.3	31607.3		Peak Found	High	High	0.0001991	0.0003112	1.04	130.98	R.SIVGATLEVIQK.K	[84-95]	Used	Used
P31167	ADP,ATP carrier protein 1, mitochondrial OS=Arabidopsis thaliana OX=3702 GN=AAC1 PE=1 SV=2	0	FALSE	27.864	20	7	18	7	381	41.4	9.83	48.62	7	0	3.451	0.865884	46.65	651878	188116	High	High	1		1.78701	-0.537945
Annotated Sequence	Modifications	Contaminant	Qvality PEP	Qvality q-value	# Protein Groups	# Proteins	# PSMs	Master Protein Accessions	Positions in Master Proteins	Modifications in Master Proteins	# Missed Cleavages	Theo. MH+ [Da]	# Razor Quan Results	Abundance Ratio: (F4) / (F3)	Abundance Ratio Adj. P-Value: (F4) / (F3)	Abundance Ratio Variability [%]: (F4) / (F3)	Abundances (Grouped): F4	Abundances (Grouped): F3	Quan Info	Found in Sample: [S4] F4: Sample	Found in Sample: [S3] F3: Sample	Confidence (by Search Engine): Sequest HT	Percolator q-Value (by Search Engine): Sequest HT	Percolator PEP (by Search Engine): Sequest HT	XCorr (by Search Engine): Sequest HT	Top Apex RT [min]	Sequence in Protein	Positions in Proteins	Quan Usage	Quan Ratio Usage
[R].GEEEASPFTVSR.[F]		FALSE	0.000596622	0.000572698	1	1	2	Q84R10	Q84R10 [489-500]		0	1308.61	0	2.587	0.929909	0	114367	44210.2		High	Peak Found	High	0.0001305	0.0001161	3.64	83.79	R.GEEEASPFTVSR.F	[489-500]	Used	Used
[R].RPMDHQGNMITAQGR.[D]		FALSE	0.00105952	0.000987479	1	1	2	Q84R10	Q84R10 [376-390]		0	1711.81	0	1.179	0.696954	0	43403.5	36821.1		High	High	High	0.0001991	0.000208	2.97	55.63	R.RPMDHQGNMITAQGR.D	[376-390]	Used	Used
[R].VSSDLSLFYR.[C]		FALSE	0.00557547	0.00166669	1	1	1	Q84R10	Q84R10 [319-328]		0	1186.61	0	1.771	0.902941	0	20659.3	11665.9		High	Peak Found	High	0.0003948	0.001168	1.7	125.86	R.VSSDLSLFYR.C	[319-328]	Used	Used
Q9FI56	Chaperone protein ClpC1, chloroplastic OS=Arabidopsis thaliana OX=3702 GN=CLPC1 PE=1 SV=1	0	FALSE	23.693	10	7	12	7	929	103.4	6.77	36.66	7	0	3.421	0.868857	43.86	246959	63119.1	High	High	1		1.77442	-0.534153
Annotated Sequence	Modifications	Contaminant	Qvality PEP	Qvality q-value	# Protein Groups	# Proteins	# PSMs	Master Protein Accessions	Positions in Master Proteins	Modifications in Master Proteins	# Missed Cleavages	Theo. MH+ [Da]	# Razor Quan Results	Abundance Ratio: (F4) / (F3)	Abundance Ratio Adj. P-Value: (F4) / (F3)	Abundance Ratio Variability [%]: (F4) / (F3)	Abundances (Grouped): F4	Abundances (Grouped): F3	Quan Info	Found in Sample: [S4] F4: Sample	Found in Sample: [S3] F3: Sample	Confidence (by Search Engine): Sequest HT	Percolator q-Value (by Search Engine): Sequest HT	Percolator PEP (by Search Engine): Sequest HT	XCorr (by Search Engine): Sequest HT	Top Apex RT [min]	Sequence in Protein	Positions in Proteins	Quan Usage	Quan Ratio Usage
[K].GFVFGTATSAYQVEGETHQDGR.[G]		FALSE	0.000276014	0.000572698	1	1	2	Q9LV33	Q9LV33 [47-68]		0	2357.08	0	0.204	0.000485164	0	4265.45	20892.9		Peak Found	High	High	0.0001305	5.296e-05	2.48	116.28	K.GFVFGTATSAYQVEGETHQDGR.G	[47-68]	Used	Used
[R].GPSIWDAFVK.[I]		FALSE	0.00111293	0.000987479	1	2	5	Q9LV33	Q9LV33 [69-78]		0	1119.58	0	1.83	0.934141	0	50548.1	27615.8		High	High	High	0.0001991	0.0002187	2.98	152.09	R.GPSIWDAFVK.I	[69-78]	Used	Used
[R].FSLSWSR.[IL]		FALSE	0.00417516	0.00166669	3	24	3	Q9FH03; Q9LV33; O82772	Q9FH03 [109-115]; Q9LV33 [116-122]; O82772 [112-118]		0	882.447	0	2.176	0.993138	0	66488.1	30554.8	Shared	High	High	High	0.0003407	0.0008626	2.02	116.12	R.FSISWSR.I	[116-122]	Used	Used
[R].YKEDVDLMK.[K]		FALSE	0.00676991	0.00166669	1	1	3	Q9LV33	Q9LV33 [99-107]		1	1140.56	0	1.934	0.95749	0	73141.7	37809.2		High	High	High	0.0003948	0.001423	2.64	70.82	R.YKEDVDLMK.K	[99-107]	Used	Used
[K].NWMTFNEPR.[V]		FALSE	0.00956981	0.00190722	1	2	4	Q9LV33	Q9LV33 [199-207]		0	1194.54	0	0.878	0.26862	0	17656.5	20112.4		Peak Found	High	High	0.0004264	0.002036	2.74	118.64	K.NWMTFNEPR.V	[199-207]	Used	Used
P06525	Alcohol dehydrogenase class-P OS=Arabidopsis thaliana OX=3702 GN=ADH1 PE=1 SV=2	0	FALSE	23.357	21	7	26	7	379	41.2	6.24	60.98	7	0	3.299	0.874367	37.75	848024	286587	High	High	1		1.72203	-0.518382
Annotated Sequence	Modifications	Contaminant	Qvality PEP	Qvality q-value	# Protein Groups	# Proteins	# PSMs	Master Protein Accessions	Positions in Master Proteins	Modifications in Master Proteins	# Missed Cleavages	Theo. MH+ [Da]	# Razor Quan Results	Abundance Ratio: (F4) / (F3)	Abundance Ratio Adj. P-Value: (F4) / (F3)	Abundance Ratio Variability [%]: (F4) / (F3)	Abundances (Grouped): F4	Abundances (Grouped): F3	Quan Info	Found in Sample: [S4] F4: Sample	Found in Sample: [S3] F3: Sample	Confidence (by Search Engine): Sequest HT	Percolator q-Value (by Search Engine): Sequest HT	Percolator PEP (by Search Engine): Sequest HT	XCorr (by Search Engine): Sequest HT	Top Apex RT [min]	Sequence in Protein	Positions in Proteins	Quan Usage	Quan Ratio Usage
[K].KTEGEFFEAEKEEK.[K]		FALSE	0.00060429	0.000572698	2	3	2	Q9C9C6; Q9FZ76	Q9C9C6 [171-184]; Q9FZ76 [171-184]		2	1700.8	0	1.813	0.933727	0	58337.7	32168.9	Shared	High	Peak Found	High	0.0001305	0.0001172	3.79	68.28	K.KTEGEFFEAEKEEK.K	[171-184]	Used	Used
[R].VNQAYVIGTSTK.[VI]		FALSE	0.000253045	0.000572698	2	3	1	Q9C9C6; Q9FZ76	Q9C9C6 [134-145]; Q9FZ76 [134-145]		0	1280.68	0	2.728	0.87765	0	215125	78870.2	Shared	High	Peak Found	High	0.0001305	4.843e-05	4.2	71.02	R.VNQAYVIGTSTK.V	[134-145]	Used	Used
[K].AVDAALIK.[A]		FALSE	0.0150979	0.00190722	1	2	1	Q9C9C6	Q9C9C6 [197-204]		0	800.488	0	1.587	0.862316	0	34554.2	21768		High	Peak Found	High	0.0004264	0.00329	2.42	72.61	K.AVDAALIK.A	[197-204]	Used	Used
[K].AIEAVPELK.[T]		FALSE	0.0601735	0.00545717	1	2	1	Q9C9C6	Q9C9C6 [205-213]		0	969.562	0	2.108	0.981677	0	58821.1	27903.5		High	Peak Found	High	0.00142	0.01374	2.37	91.08	K.AIEAVPELK.T	[205-213]	Used	Used
O82191	NADP-dependent malic enzyme 1 OS=Arabidopsis thaliana OX=3702 GN=NADP-ME1 PE=1 SV=1	0	FALSE	18.798	13	7	16	7	581	64.2	6.76	32.75	7	0	3.115	0.904944	29.87	2.07255e+06	672742	High	High	1		1.63923	-0.493458
Annotated Sequence	Modifications	Contaminant	Qvality PEP	Qvality q-value	# Protein Groups	# Proteins	# PSMs	Master Protein Accessions	Positions in Master Proteins	Modifications in Master Proteins	# Missed Cleavages	Theo. MH+ [Da]	# Razor Quan Results	Abundance Ratio: (F4) / (F3)	Abundance Ratio Adj. P-Value: (F4) / (F3)	Abundance Ratio Variability [%]: (F4) / (F3)	Abundances (Grouped): F4	Abundances (Grouped): F3	Quan Info	Found in Sample: [S4] F4: Sample	Found in Sample: [S3] F3: Sample	Confidence (by Search Engine): Sequest HT	Percolator q-Value (by Search Engine): Sequest HT	Percolator PEP (by Search Engine): Sequest HT	XCorr (by Search Engine): Sequest HT	Top Apex RT [min]	Sequence in Protein	Positions in Proteins	Quan Usage	Quan Ratio Usage
[K].SSVHDVVLVGGSTR.[I]		FALSE	7.8146e-05	0.000572698	2	2	7	Q9LHA8; Q9S9N1	Q9LHA8 [335-348]; Q9S9N1 [334-347]		0	1412.75	0	1.418	0.975818	0	254293	179385	Shared	High	High	High	0.0001305	1.47e-05	4.17	73.01	K.SSVHDVVLVGGSTR.I	[334-347]	Used	Used
[K].NAVVTVPAYFNDSQR.[Q]		FALSE	0.000589048	0.000572698	3	6	5	Q9LHA8; Q9S9N1; P22953	Q9LHA8 [145-159]; Q9S9N1 [144-158]; P22953 [145-159]		0	1680.83	0	1.955	0.96464	0	255147	130522	Shared	High	High	High	0.0001305	0.0001143	3.08	117.47	K.NAVVTVPAYFNDSQR.Q	[144-158]	Used	Used
[K].NQVALNPQNTVFDAK.[R]		FALSE	2.24912e-05	0.000572698	1	1	3	Q9S9N1	Q9S9N1 [59-73]		0	1658.85	0	2.307	0.935771	0	132240	57324.2		High	Peak Found	High	0.0001305	4.149e-06	5.66	105.97	K.NQVALNPQNTVFDAK.R	[59-73]	Used	Used
[K].QFSPEEISSMVLVK.[M]		FALSE	0.0001119	0.000572698	1	1	3	Q9S9N1	Q9S9N1 [116-129]		0	1593.82	0	0.898	0.590108	0	61660.6	68657.3		High	High	High	0.0001305	2.114e-05	1.66	152.34	K.QFSPEEISSMVLVK.M	[116-129]	Used	Used
[K].MKEVAEAFLGR.[T]		FALSE	0.000345777	0.000572698	1	1	1	Q9S9N1	Q9S9N1 [130-140]		1	1250.66	0						No Quan Values	High	Not Found	High	0.0001305	6.663e-05	2.89		K.MKEVAEAFLGR.T	[130-140]	Not Used	Not Used
[K].MYQGGAAAGGMPTDGDFSSSGAAGGPK.[I]		FALSE	4.34852e-07	0.000572698	1	1	6	Q9S9N1	Q9S9N1 [615-641]		0	2445.04	0	4.41	0.694357	0	105640	23956.7		High	High	High	0.0001305	7.546e-08	6.63	95.66	K.MYQGGAAAGGMPTDGDFSSSGAAGGPK.I	[615-641]	Used	Used
[R].IINEPTAAAIAYGLDKK.[AG]		FALSE	0.000201792	0.000572698	5	8	2	Q9LHA8; Q9S9N1; Q39043; Q9LKR3; P22953	Q9LHA8 [176-192]; Q9S9N1 [175-191]; Q39043 [204-220]; Q9LKR3 [204-220]; P22953 [176-192]		1	1787.99	0	1.22	0.939328	0	136123	111572	Shared	High	Peak Found	High	0.0001305	3.858e-05	5.1	119.32	R.IINEPTAAAIAYGLDKK.G	[175-191]	Used	Used
[R].IINEPTAAAIAYGLDK.[K]		FALSE	4.42554e-07	0.000572698	5	8	5	Q9LHA8; Q9S9N1; Q39043; Q9LKR3; P22953	Q9LHA8 [176-191]; Q9S9N1 [175-190]; Q39043 [204-219]; Q9LKR3 [204-219]; P22953 [176-191]		0	1659.9	0	4.289	0.639606	0	304299	70954.8	Shared	High	High	High	0.0001305	7.69e-08	4.91	129.64	R.IINEPTAAAIAYGLDK.K	[175-190]	Used	Used
[K].DAGAISGLNVLR.[I]		FALSE	9.31088e-05	0.000572698	1	1	2	Q9S9N1	Q9S9N1 [163-174]		0	1185.66	0	1.233	0.929173	0	109090	88492.4		High	High	High	0.0001305	1.753e-05	3.2	119.72	K.DAGAISGLNVLR.I	[163-174]	Used	Used
[K].ATAGDTHLGGEDFDNR.[ML]		FALSE	4.53214e-06	0.000572698	3	6	9	Q9LHA8; Q9S9N1; P22953	Q9LHA8 [227-242]; Q9S9N1 [226-241]; P22953 [227-242]		0	1675.73	0	2.011	0.959731	0	1.4403e+06	716098	Shared	High	High	High	0.0001305	8.17e-07	4.78	67.75	K.ATAGDTHLGGEDFDNR.L	[226-241]	Used	Used
[K].VVSGPGEKPMIVVSYKNEEK.[Q]		FALSE	0.000612052	0.000572698	1	1	2	Q9S9N1	Q9S9N1 [96-115]		1	2190.15	0	0.01	5.76991e-17			14038.2		Not Found	High	High	0.0001305	0.0001191	2.2	85.15	K.VVSGPGEKPMIVVSYKNEEK.Q	[96-115]	Used	Used
[K].AIDETIEWIEGNQLAEVDEFEYK.[L]		FALSE	0.000176277	0.000572698	1	1	1	Q9S9N1	Q9S9N1 [578-600]		0	2741.28	0						No Quan Values	Not Found	High	High	0.0001305	3.354e-05	5.64		K.AIDETIEWIEGNQLAEVDEFEYK.L	[578-600]	Not Used	Not Used
[KR].FEEMNMDLFR.[K]		FALSE	0.000265434	0.000572698	1	3	2	Q9S9N1	Q9S9N1 [307-316]		0	1331.58	0	5.307	0.578654	0	28532.9	5376.62		High	Peak Found	High	0.0001305	5.086e-05	3.45	143.74	R.FEEMNMDLFR.K	[307-316]	Used	Used
[R].TTPSYVAFTDTER.[L]		FALSE	0.000270086	0.000572698	1	1	7	Q9S9N1	Q9S9N1 [39-51]		0	1487.7	0	1.93	0.96464	0	181512	94036		High	High	High	0.0001305	5.177e-05	3.26	100.68	R.TTPSYVAFTDTER.L	[39-51]	Used	Used
[K].FSDPSVQSDILHWPFK.[V]		FALSE	0.00159332	0.000987479	1	1	2	Q9S9N1	Q9S9N1 [80-95]		0	1902.94	0	2.253	0.966045	0	22913.9	10168.6		High	Peak Found	High	0.0001991	0.0003159	2.23	155.53	K.FSDPSVQSDILHWPFK.V	[80-95]	Used	Used
[R].DNNLLGTFELK.[G]		FALSE	0.00183151	0.000987479	1	1	2	Q9S9N1	Q9S9N1 [457-467]		0	1263.66	0	0.01	5.76991e-17			14192.4		Not Found	High	High	0.0001991	0.000365	2.65	144.67	R.DNNLLGTFELK.G	[457-467]	Used	Used
[K].VVSGPGEKPMIVVSYK.[N]		FALSE	0.00108149	0.000987479	1	1	2	Q9S9N1	Q9S9N1 [96-111]		0	1689.92	0	7.108	0.294263	0	105935	14904		High	Peak Found	High	0.0001991	0.0002126	3.63	96.65	K.VVSGPGEKPMIVVSYK.N	[96-111]	Used	Used
[K].SINPDEAVAYGAAVQAAILTGEGSEK.[V]		FALSE	0.00149466	0.000987479	1	1	4	Q9S9N1	Q9S9N1 [367-392]		0	2561.27	0	1.014	0.511657	0	8699.08	8581.64		Peak Found	High	High	0.0001991	0.0002959	2.22	171.65	K.SINPDEAVAYGAAVQAAILTGEGSEK.V	[367-392]	Used	Used
[R].LVNHFVAEFR.[R]		FALSE	0.00765893	0.00166669	1	1	1	Q9S9N1	Q9S9N1 [242-251]		0	1231.66	0	0.01	5.76991e-17			10342.5		Not Found	High	High	0.0003948	0.001618	2.18	101.18	R.LVNHFVAEFR.R	[242-251]	Used	Used
[K].NAVVTVPAYFNDSQR.[Q]	1xDeamidated [N/Q]	FALSE	0.00647293	0.00166669	3	6	5	Q9LHA8; Q9S9N1; P22953	Q9LHA8 [145-159]; Q9S9N1 [144-158]; P22953 [145-159]		0	1681.82	0	4.974	0.610595	0	88585.8	17809.5	Shared	High	High	High	0.0003948	0.001362	2.85	120.07	K.NAVVTVPAYFNDSQR.Q	[144-158]	Used	Used
[K].MYQGGAAAGGMPTDGDFSSSGAAGGPKIEEVD.[-]		FALSE	0.0152579	0.00190722	1	1	4	Q9S9N1	Q9S9N1 [615-646]		1	3030.31	0	0.01	5.76991e-17			23857.1		Not Found	High	High	0.0004264	0.003327	3.39	116.88	K.MYQGGAAAGGMPTDGDFSSSGAAGGPKIEEVD.-	[615-646]	Used	Used
[K].EVAEAFLGR.[T]		FALSE	0.0151777	0.00190722	1	1	3	Q9S9N1	Q9S9N1 [132-140]		0	991.521	0	3.333	0.897461	0	49880.6	14965		High	Peak Found	High	0.0004264	0.003307	1.47	97.86	K.EVAEAFLGR.T	[132-140]	Used	Used
[K].NQITITNDKGR.[L]	1xDeamidated [N7]	FALSE	0.00938631	0.00190722	1	1	8	Q9S9N1	Q9S9N1 [504-514]		1	1260.65	0						No Quan Values	Not Found	High	High	0.0004264	0.001995	2.98		K.NQITITNDKGR.L	[504-514]	Not Used	Not Used
[R].ARFEEMNMDLFR.[K]		FALSE	0.00857053	0.00190722	1	2	1	Q9S9N1	Q9S9N1 [305-316]		1	1558.71	0	0.571	0.131116	0	5368.18	9409.4		Peak Found	High	High	0.0004264	0.001815	3.29	134	R.ARFEEMNMDLFR.K	[305-316]	Used	Used
[K].IQQLLQDFFNGK.[E]	1xDeamidated [N10]	FALSE	0.0184877	0.0029934	1	1	1	Q9S9N1	Q9S9N1 [351-362]		0	1451.75	0	1.694	0.876061	0	20623.8	12173.3		High	Peak Found	High	0.0006192	0.00406	3.39	155.22	K.IQQLLQDFFNGK.E	[351-362]	Used	Used
[R].LSKEEIEK.[M]		FALSE	0.0207178	0.00332708	2	2	6	Q9LHA8; Q9S9N1	Q9LHA8 [516-523]; Q9S9N1 [515-522]		1	975.536	0	0.994	0.784258	0	81494.6	82007.7	Shared	High	High	High	0.0006776	0.004586	2.5	38.96	R.LSKEEIEK.M	[515-522]	Used	Used
[K].EQVFSTYADNQPGVLIQVYEGER.[A]		FALSE	0.136787	0.00875015	1	1	1	Q9S9N1	Q9S9N1 [430-452]		0	2642.27	0						No Quan Values	Not Found	High	High	0.002458	0.03052	2.19		K.EQVFSTYADNQPGVLIQVYEGER.A	[430-452]	Not Used	Not Used
Q9LW57	Plastid-lipid-associated protein 6, chloroplastic OS=Arabidopsis thaliana OX=3702 GN=PAP6 PE=1 SV=1	0	FALSE	31.762	37	7	23	7	284	30.4	6.13	69.37	7	0	1.934	0.904944	88.54	493545	252070	High	High	1		0.951588	-0.286456
Annotated Sequence	Modifications	Contaminant	Qvality PEP	Qvality q-value	# Protein Groups	# Proteins	# PSMs	Master Protein Accessions	Positions in Master Proteins	Modifications in Master Proteins	# Missed Cleavages	Theo. MH+ [Da]	# Razor Quan Results	Abundance Ratio: (F4) / (F3)	Abundance Ratio Adj. P-Value: (F4) / (F3)	Abundance Ratio Variability [%]: (F4) / (F3)	Abundances (Grouped): F4	Abundances (Grouped): F3	Quan Info	Found in Sample: [S4] F4: Sample	Found in Sample: [S3] F3: Sample	Confidence (by Search Engine): Sequest HT	Percolator q-Value (by Search Engine): Sequest HT	Percolator PEP (by Search Engine): Sequest HT	XCorr (by Search Engine): Sequest HT	Top Apex RT [min]	Sequence in Protein	Positions in Proteins	Quan Usage	Quan Ratio Usage
[R].ENSKPVDQQRWPGASR.[R]	1xDeamidated [Q8]	FALSE	0.0176144	0.0029934	1	1	1	Q94AI1	Q94AI1 [187-202]		1	1855.9	0	3.1	0.925353	0	40670.7	13118.3		Peak Found	High	High	0.0006192	0.003866	2.21	103.39	R.ENSKPVDQQRWPGASR.R	[187-202]	Used	Used
Q9STW6	Heat shock 70 kDa protein 6, chloroplastic OS=Arabidopsis thaliana OX=3702 GN=HSP70-6 PE=1 SV=1	0	FALSE	21.167	10	7	12	1	718	76.5	5.2	26.07	7	0	3.093	0.907408	0	66648.3	21546.3	Peak Found	High	1		1.62901	-0.49038
Annotated Sequence	Modifications	Contaminant	Qvality PEP	Qvality q-value	# Protein Groups	# Proteins	# PSMs	Master Protein Accessions	Positions in Master Proteins	Modifications in Master Proteins	# Missed Cleavages	Theo. MH+ [Da]	# Razor Quan Results	Abundance Ratio: (F4) / (F3)	Abundance Ratio Adj. P-Value: (F4) / (F3)	Abundance Ratio Variability [%]: (F4) / (F3)	Abundances (Grouped): F4	Abundances (Grouped): F3	Quan Info	Found in Sample: [S4] F4: Sample	Found in Sample: [S3] F3: Sample	Confidence (by Search Engine): Sequest HT	Percolator q-Value (by Search Engine): Sequest HT	Percolator PEP (by Search Engine): Sequest HT	XCorr (by Search Engine): Sequest HT	Top Apex RT [min]	Sequence in Protein	Positions in Proteins	Quan Usage	Quan Ratio Usage
[R].DLVGVLEDAIR.[G]		FALSE	0.000857688	0.000572698	1	2	4	P21240	P21240 [286-296]		0	1199.66	0	100	5.76991e-17		15986.3			High	Not Found	High	0.0001305	0.0001677	2.93	176.35	R.DLVGVLEDAIR.G	[286-296]	Used	Used
[K].VVAAGANPVLITR.[G]		FALSE	0.000218251	0.000572698	1	3	5	P21240	P21240 [161-173]		0	1280.77	0	2.851	0.940392	0	57680.1	20233.2		High	High	High	0.0001305	4.177e-05	2.58	93.14	K.VVAAGANPVLITR.G	[161-173]	Used	Used
[R].EVELEDPVENIGAK.[L]		FALSE	0.000160138	0.000572698	1	3	5	P21240	P21240 [114-127]		0	1541.77	0	3.197	0.924352	0	33572.5	10501.4		High	Peak Found	High	0.0001305	3.051e-05	2.86	112.91	R.EVELEDPVENIGAK.L	[114-127]	Used	Used
Q96528	Catalase-1 OS=Arabidopsis thaliana OX=3702 GN=CAT1 PE=1 SV=3	0	FALSE	27.626	15	7	26	3	492	56.7	7.42	47.46	7	0	3.023	0.919015	9.32	168959	65312.6	High	High	1		1.59598	-0.480438
Annotated Sequence	Modifications	Contaminant	Qvality PEP	Qvality q-value	# Protein Groups	# Proteins	# PSMs	Master Protein Accessions	Positions in Master Proteins	Modifications in Master Proteins	# Missed Cleavages	Theo. MH+ [Da]	# Razor Quan Results	Abundance Ratio: (F4) / (F3)	Abundance Ratio Adj. P-Value: (F4) / (F3)	Abundance Ratio Variability [%]: (F4) / (F3)	Abundances (Grouped): F4	Abundances (Grouped): F3	Quan Info	Found in Sample: [S4] F4: Sample	Found in Sample: [S3] F3: Sample	Confidence (by Search Engine): Sequest HT	Percolator q-Value (by Search Engine): Sequest HT	Percolator PEP (by Search Engine): Sequest HT	XCorr (by Search Engine): Sequest HT	Top Apex RT [min]	Sequence in Protein	Positions in Proteins	Quan Usage	Quan Ratio Usage
[K].LAEQAERYEEMVEFMEK.[V]		FALSE	1.03435e-05	0.000572698	3	6	12	P46077; P42645; Q01525	P46077 [20-36]; P42645 [16-32]; Q01525 [14-30]		1	2131.97	0	0.678	0.553487	0	69889.2	103151	Shared	High	High	High	0.0001305	1.888e-06	3.21	141.92	K.LAEQAERYEEMVEFMEK.V	[20-36]	Not Used	Not Used
[R].YEEMVEFMEK.[V]		FALSE	0.000268916	0.000572698	3	6	4	P46077; P42645; Q01525	P46077 [27-36]; P42645 [23-32]; Q01525 [21-30]		0	1334.56	0	16.783	0.0135208	0	80415.5	4791.5	Shared	High	Peak Found	High	0.0001305	5.159e-05	3.66	122.11	R.YEEMVEFMEK.V	[27-36]	Not Used	Not Used
[K].AAQDIANAELAPTHPIR.[L]		FALSE	0.00198284	0.000987479	1	1	1	P46077	P46077 [163-179]		0	1787.94	0	3.011	0.933727	0	34282.5	11386.5		High	Peak Found	High	0.0001991	0.0003967	1.94	88.89	K.AAQDIANAELAPTHPIR.L	[163-179]	Used	Used
[K].DSTLIMQLLR.[D]		FALSE	0.00120739	0.000987479	6	12	1	P46077; P42645; P48348; P48349; Q01525; P48347	P46077 [225-234]; P42645 [221-230]; P48348 [222-231]; P48349 [222-231]; Q01525 [219-228]; P48347 [217-226]		0	1189.66	0	10.61	0.0782366	0	37433.2	3528.26	Shared	High	Peak Found	High	0.0001991	0.0002378	2.6	166.1	K.DSTLIMQLLR.D	[225-234]	Not Used	Not Used
[R].NLLSVAYK.[N]		FALSE	0.0207178	0.00332708	5	8	4	P46077; P42645; P48348; P48349; Q01525	P46077 [52-59]; P42645 [48-55]; P48348 [49-56]; P48349 [49-56]; Q01525 [46-53]		0	907.525	0	0.772	0.370148	0	47834.2	61961.4	Shared	High	High	High	0.0006776	0.00459	2.12	101.17	R.NLLSVAYK.N	[52-59]	Not Used	Not Used
Q0WNJ6	Clathrin heavy chain 1 OS=Arabidopsis thaliana OX=3702 GN=CHC1 PE=1 SV=1	0	FALSE	25.644	6	7	14	1	1705	193.1	5.4	34.98	7	0	3.22	0.919479	0	16452	5108.77	High	Peak Found	1		1.68706	-0.507856
Annotated Sequence	Modifications	Contaminant	Qvality PEP	Qvality q-value	# Protein Groups	# Proteins	# PSMs	Master Protein Accessions	Positions in Master Proteins	Modifications in Master Proteins	# Missed Cleavages	Theo. MH+ [Da]	# Razor Quan Results	Abundance Ratio: (F4) / (F3)	Abundance Ratio Adj. P-Value: (F4) / (F3)	Abundance Ratio Variability [%]: (F4) / (F3)	Abundances (Grouped): F4	Abundances (Grouped): F3	Quan Info	Found in Sample: [S4] F4: Sample	Found in Sample: [S3] F3: Sample	Confidence (by Search Engine): Sequest HT	Percolator q-Value (by Search Engine): Sequest HT	Percolator PEP (by Search Engine): Sequest HT	XCorr (by Search Engine): Sequest HT	Top Apex RT [min]	Sequence in Protein	Positions in Proteins	Quan Usage	Quan Ratio Usage
[R].LWDLAAGVSTR.[R]		FALSE	0.000372137	0.000572698	1	1	4	O24456	O24456 [89-99]		0	1188.64	0	1.492	0.853941	0	44890.5	30079.6		High	High	High	0.0001305	7.177e-05	2.25	124.64	R.LWDLAAGVSTR.R	[89-99]	Used	Used
[R].FSPNTLQPTIVSASWDK.[T]		FALSE	0.000485964	0.000572698	1	1	5	O24456	O24456 [158-174]		0	1890.96	0	2.024	0.968855	0	61725.6	30494.3		High	High	High	0.0001305	9.418e-05	2.33	135.29	R.FSPNTLQPTIVSASWDK.T	[158-174]	Used	Used
[KR].IWDLESK.[S]		FALSE	0.0113175	0.00190722	1	3	2	O24456	O24456 [260-266]		0	890.462	0	3.198	0.919939	0	55833.5	17458.1		High	Peak Found	High	0.0004264	0.002431	2.28	98.12	K.IWDLESK.S	[260-266]	Used	Used
Q9FJ62	Glycerophosphodiester phosphodiesterase GDPDL4 OS=Arabidopsis thaliana OX=3702 GN=GDPDL4 PE=1 SV=1	0	FALSE	27.981	12	7	13	7	766	84.1	5.67	35.28	7	0	2.027	0.923275	45.58	142997	76824.8	High	High	1		1.01935	-0.306854
Annotated Sequence	Modifications	Contaminant	Qvality PEP	Qvality q-value	# Protein Groups	# Proteins	# PSMs	Master Protein Accessions	Positions in Master Proteins	Modifications in Master Proteins	# Missed Cleavages	Theo. MH+ [Da]	# Razor Quan Results	Abundance Ratio: (F4) / (F3)	Abundance Ratio Adj. P-Value: (F4) / (F3)	Abundance Ratio Variability [%]: (F4) / (F3)	Abundances (Grouped): F4	Abundances (Grouped): F3	Quan Info	Found in Sample: [S4] F4: Sample	Found in Sample: [S3] F3: Sample	Confidence (by Search Engine): Sequest HT	Percolator q-Value (by Search Engine): Sequest HT	Percolator PEP (by Search Engine): Sequest HT	XCorr (by Search Engine): Sequest HT	Top Apex RT [min]	Sequence in Protein	Positions in Proteins	Quan Usage	Quan Ratio Usage
[K].LVAEVLLDEVAEK.[S]		FALSE	0.000235013	0.000572698	1	1	1	Q9FPF0	Q9FPF0 [260-272]		0	1427.8	0	4.989	0.666904	0	24855.3	4982.21		High	Peak Found	High	0.0001305	4.506e-05	2.42	152.67	K.LVAEVLLDEVAEK.S	[260-272]	Used	Used
[R].VVVDGNVITSR.[A]		FALSE	0.00559961	0.00166669	1	1	6	Q9FPF0	Q9FPF0 [351-361]		0	1158.65	0	1.669	0.913969	0	52397.7	31397.6		High	Peak Found	High	0.0003948	0.001171	3.24	79.87	R.VVVDGNVITSR.A	[351-361]	Used	Used
[K].SFDLIVLPGGLNGAQR.[F]	1xDeamidated [N12]	FALSE	0.00557547	0.00166669	1	1	3	Q9FPF0	Q9FPF0 [273-288]		0	1657.89	0	100	5.76991e-17		19983.9			High	Not Found	High	0.0003948	0.001165	2.6	160.17	K.SFDLIVLPGGLNGAQR.F	[273-288]	Used	Used
P34790	Peptidyl-prolyl cis-trans isomerase CYP18-3 OS=Arabidopsis thaliana OX=3702 GN=CYP18-3 PE=1 SV=1	0	FALSE	25.44	52	7	29	7	172	18.4	7.81	80.9	7	0	2.128	0.950819	49.2	1.09845e+06	687006	High	High	1		1.0895	-0.327972
Annotated Sequence	Modifications	Contaminant	Qvality PEP	Qvality q-value	# Protein Groups	# Proteins	# PSMs	Master Protein Accessions	Positions in Master Proteins	Modifications in Master Proteins	# Missed Cleavages	Theo. MH+ [Da]	# Razor Quan Results	Abundance Ratio: (F4) / (F3)	Abundance Ratio Adj. P-Value: (F4) / (F3)	Abundance Ratio Variability [%]: (F4) / (F3)	Abundances (Grouped): F4	Abundances (Grouped): F3	Quan Info	Found in Sample: [S4] F4: Sample	Found in Sample: [S3] F3: Sample	Confidence (by Search Engine): Sequest HT	Percolator q-Value (by Search Engine): Sequest HT	Percolator PEP (by Search Engine): Sequest HT	XCorr (by Search Engine): Sequest HT	Top Apex RT [min]	Sequence in Protein	Positions in Proteins	Quan Usage	Quan Ratio Usage
[K].EAASVVSSVSEGK.[M]		FALSE	0.00299417	0.00143413	1	1	2	O23627	O23627 [697-709]		0	1249.63	0	2.225	0.963438	0	20584.9	9253.59		High	High	High	0.0002813	0.0006099	3.2	64.68	K.EAASVVSSVSEGK.M	[697-709]	Used	Used
P39207	Nucleoside diphosphate kinase 1 OS=Arabidopsis thaliana OX=3702 GN=NDK1 PE=1 SV=1	0	FALSE	24.423	53	7	28	7	149	16.5	6.79	78.33	7	0	2.871	0.950819	48.32	483536	179797	High	High	1	Acetyl [N-Term]	1.52155	-0.458033
Annotated Sequence	Modifications	Contaminant	Qvality PEP	Qvality q-value	# Protein Groups	# Proteins	# PSMs	Master Protein Accessions	Positions in Master Proteins	Modifications in Master Proteins	# Missed Cleavages	Theo. MH+ [Da]	# Razor Quan Results	Abundance Ratio: (F4) / (F3)	Abundance Ratio Adj. P-Value: (F4) / (F3)	Abundance Ratio Variability [%]: (F4) / (F3)	Abundances (Grouped): F4	Abundances (Grouped): F3	Quan Info	Found in Sample: [S4] F4: Sample	Found in Sample: [S3] F3: Sample	Confidence (by Search Engine): Sequest HT	Percolator q-Value (by Search Engine): Sequest HT	Percolator PEP (by Search Engine): Sequest HT	XCorr (by Search Engine): Sequest HT	Top Apex RT [min]	Sequence in Protein	Positions in Proteins	Quan Usage	Quan Ratio Usage
[K].KVLQFAGIDDVFTSSR.[G]		FALSE	0.000644065	0.000572698	2	4	1	P49688; Q93VB8	P49688 [206-221]; Q93VB8 [205-220]		1	1782.94	0						No Quan Values	Not Found	High	High	0.0001305	0.0001251	2.63		K.KVLQFAGIDDVFTSSR.G	[205-220]	Not Used	Not Used
[R].SPYQEHTDFLSTK.[A]		FALSE	0.000527166	0.000572698	1	2	6	Q93VB8	Q93VB8 [257-269]		0	1552.73	0	2.366	0.975514	0	88107.6	37233.9		High	High	High	0.0001305	0.0001021	2.77	85.13	R.SPYQEHTDFLSTK.A	[257-269]	Used	Used
[K].TYGFLTPEFWK.[E]		FALSE	0.00134658	0.000987479	2	4	2	P49688; Q93VB8	P49688 [241-251]; Q93VB8 [240-250]		0	1388.69	0						No Quan Values	Not Found	High	High	0.0001991	0.0002661	2.65		K.TYGFLTPEFWK.E	[240-250]	Not Used	Not Used
Q9LTX9	Heat shock 70 kDa protein 7, chloroplastic OS=Arabidopsis thaliana OX=3702 GN=HSP70-7 PE=2 SV=1	0	FALSE	20.419	10	7	13	1	718	77	5.3	27.4	7	5	2.367	0.994322	36.86	208824	110059	High	Peak Found	1		1.24306	-0.374198
Annotated Sequence	Modifications	Contaminant	Qvality PEP	Qvality q-value	# Protein Groups	# Proteins	# PSMs	Master Protein Accessions	Positions in Master Proteins	Modifications in Master Proteins	# Missed Cleavages	Theo. MH+ [Da]	# Razor Quan Results	Abundance Ratio: (F4) / (F3)	Abundance Ratio Adj. P-Value: (F4) / (F3)	Abundance Ratio Variability [%]: (F4) / (F3)	Abundances (Grouped): F4	Abundances (Grouped): F3	Quan Info	Found in Sample: [S4] F4: Sample	Found in Sample: [S3] F3: Sample	Confidence (by Search Engine): Sequest HT	Percolator q-Value (by Search Engine): Sequest HT	Percolator PEP (by Search Engine): Sequest HT	XCorr (by Search Engine): Sequest HT	Top Apex RT [min]	Sequence in Protein	Positions in Proteins	Quan Usage	Quan Ratio Usage
[R].FALLLDDLK.[V]		FALSE	0.00457055	0.00166669	1	1	3	Q9XEX2	Q9XEX2 [130-138]		0	1047.61	0						No Quan Values	High	High	High	0.0003407	0.0009483	1.35	153.4	R.FALLLDDLK.V	[130-138]	Not Used	Not Used
[K].VTVANVESGGEFTVSSADDILK.[A]		FALSE	0.0114318	0.00190722	1	1	1	Q9XEX2	Q9XEX2 [139-160]		0	2238.11	0	1.681	0.876061	0	20160.2	11996.1		High	Peak Found	High	0.0004264	0.002455	3.37	142.4	K.VTVANVESGGEFTVSSADDILK.A	[139-160]	Used	Used
[K].HVPGFIEK.[A]		FALSE	0.048428	0.00486181	1	1	4	Q9XEX2	Q9XEX2 [55-62]		0	926.509	0	3.544	0.816512	0	114895	32417.1		High	High	High	0.001133	0.01105	2.18	66.52	K.HVPGFIEK.A	[55-62]	Used	Used
Q96292	Actin-2 OS=Arabidopsis thaliana OX=3702 GN=ACT2 PE=1 SV=1	0	FALSE	29.056	24	7	32	2	377	41.9	5.58	98.71	7	0	2.407	0.999265	0	29976.2	12452.1	High	High	1		1.26724	-0.381476
Annotated Sequence	Modifications	Contaminant	Qvality PEP	Qvality q-value	# Protein Groups	# Proteins	# PSMs	Master Protein Accessions	Positions in Master Proteins	Modifications in Master Proteins	# Missed Cleavages	Theo. MH+ [Da]	# Razor Quan Results	Abundance Ratio: (F4) / (F3)	Abundance Ratio Adj. P-Value: (F4) / (F3)	Abundance Ratio Variability [%]: (F4) / (F3)	Abundances (Grouped): F4	Abundances (Grouped): F3	Quan Info	Found in Sample: [S4] F4: Sample	Found in Sample: [S3] F3: Sample	Confidence (by Search Engine): Sequest HT	Percolator q-Value (by Search Engine): Sequest HT	Percolator PEP (by Search Engine): Sequest HT	XCorr (by Search Engine): Sequest HT	Top Apex RT [min]	Sequence in Protein	Positions in Proteins	Quan Usage	Quan Ratio Usage
[R].MQADNTLPLAQR.[R]		FALSE	0.00067481	0.000572698	1	1	4	Q9C5M0	Q9C5M0 [133-144]		0	1357.69	0	11.474	0.0782829	0	132682	11563.3		High	High	High	0.0001305	0.0001316	2.92	85.18	R.MQADNTLPLAQR.R	[133-144]	Used	Used
[R].MQADNTLPLAQR.[R]	1xOxidation [M1]	FALSE	0.00206307	0.000987479	1	1	1	Q9C5M0	Q9C5M0 [133-144]		0	1373.68	0						No Quan Values	High	Not Found	High	0.0001991	0.000413	3.17		R.MQADNTLPLAQR.R	[133-144]	Not Used	Not Used
P15458	2S seed storage protein 2 OS=Arabidopsis thaliana OX=3702 GN=AT2S2 PE=2 SV=1	0	FALSE	50.393	36	6	244	1	170	19.3	7.15	542.8	6	0	11.466	0.00934345	0	103692	9043.62	High	Peak Found	1
Annotated Sequence	Modifications	Contaminant	Qvality PEP	Qvality q-value	# Protein Groups	# Proteins	# PSMs	Master Protein Accessions	Positions in Master Proteins	Modifications in Master Proteins	# Missed Cleavages	Theo. MH+ [Da]	# Razor Quan Results	Abundance Ratio: (F4) / (F3)	Abundance Ratio Adj. P-Value: (F4) / (F3)	Abundance Ratio Variability [%]: (F4) / (F3)	Abundances (Grouped): F4	Abundances (Grouped): F3	Quan Info	Found in Sample: [S4] F4: Sample	Found in Sample: [S3] F3: Sample	Confidence (by Search Engine): Sequest HT	Percolator q-Value (by Search Engine): Sequest HT	Percolator PEP (by Search Engine): Sequest HT	XCorr (by Search Engine): Sequest HT	Top Apex RT [min]	Sequence in Protein	Positions in Proteins	Quan Usage	Quan Ratio Usage
[K].ITYVEDVADGLEK.[A]		FALSE	7.47962e-05	0.000572698	1	2	1	Q39172	Q39172 [309-321]		0	1451.73	0	6.49	0.363569	0	48609.5	7489.9		High	Peak Found	High	0.0001305	1.407e-05	4.26	120.96	K.ITYVEDVADGLEK.A	[309-321]	Used	Used
[R].MGKPDPSTAALAQAYTPGQPIQGYGVSR.[I]	1xOxidation [M1]	FALSE	3.46754e-06	0.000572698	1	1	1	Q39172	Q39172 [58-85]		0	2877.42	0	10.107	0.116151	0	94403.2	9340.56		High	Peak Found	High	0.0001305	6.224e-07	5.55	113.07	R.MGKPDPSTAALAQAYTPGQPIQGYGVSR.I	[58-85]	Used	Used
[R].MGKPDPSTAALAQAYTPGQPIQGYGVSR.[I]		FALSE	1.41873e-05	0.000572698	1	1	6	Q39172	Q39172 [58-85]		0	2861.43	0	1.242	0.798375	0	65403.2	52643		High	High	High	0.0001305	2.603e-06	4.19	115.89	R.MGKPDPSTAALAQAYTPGQPIQGYGVSR.I	[58-85]	Used	Used
[K].DYVSGFPTESDFDFTTTTVELR.[V]		FALSE	0.00118312	0.000987479	1	1	2	Q39172	Q39172 [12-33]		0	2527.15	0						No Quan Values	High	Not Found	High	0.0001991	0.0002331	3.68		K.DYVSGFPTESDFDFTTTTVELR.V	[12-33]	Not Used	Not Used
[R].VPEGTNSVLVK.[N]		FALSE	0.00281022	0.00143413	1	1	2	Q39172	Q39172 [34-44]		0	1142.64	0	2.357	0.945037	0	120319	51057.4		High	Peak Found	High	0.0002813	0.0005702	3.26	69.72	R.VPEGTNSVLVK.N	[34-44]	Used	Used
[R].MGKPDPSTAALAQAYTPGQPIQGYGVSR.[I]	1xDeamidated [Q22]	FALSE	0.00377299	0.00166669	1	1	1	Q39172	Q39172 [58-85]		0	2862.41	0						No Quan Values	High	Not Found	High	0.0003407	0.0007758	4.47		R.MGKPDPSTAALAQAYTPGQPIQGYGVSR.I	[58-85]	Not Used	Not Used
[K].APEALVGLFHGK.[N]		FALSE	0.00468594	0.00166669	1	2	1	Q39172	Q39172 [322-333]		0	1238.69	0	7.186	0.420773	0	17767	2472.3		High	Peak Found	High	0.0003407	0.0009743	2.03	119.77	K.APEALVGLFHGK.N	[322-333]	Used	Used
Q9CAB8	Probable peroxygenase 5 OS=Arabidopsis thaliana OX=3702 GN=PXG5 PE=2 SV=1	0	FALSE	20.724	33	6	16	6	192	21.5	8.92	44.49	6	0	6.359	0.231916	62.95	438541	80862.3	High	High	1		2.6688	-0.803389
Annotated Sequence	Modifications	Contaminant	Qvality PEP	Qvality q-value	# Protein Groups	# Proteins	# PSMs	Master Protein Accessions	Positions in Master Proteins	Modifications in Master Proteins	# Missed Cleavages	Theo. MH+ [Da]	# Razor Quan Results	Abundance Ratio: (F4) / (F3)	Abundance Ratio Adj. P-Value: (F4) / (F3)	Abundance Ratio Variability [%]: (F4) / (F3)	Abundances (Grouped): F4	Abundances (Grouped): F3	Quan Info	Found in Sample: [S4] F4: Sample	Found in Sample: [S3] F3: Sample	Confidence (by Search Engine): Sequest HT	Percolator q-Value (by Search Engine): Sequest HT	Percolator PEP (by Search Engine): Sequest HT	XCorr (by Search Engine): Sequest HT	Top Apex RT [min]	Sequence in Protein	Positions in Proteins	Quan Usage	Quan Ratio Usage
[K].GFSFSFPIEVK.[N]		FALSE	0.000932186	0.000572698	1	1	3	Q9CAB8	Q9CAB8 [74-84]		0	1257.65	0	9.984	0.0854456	0	32856.2	3290.92		High	Peak Found	High	0.0001305	0.0001823	2.63	162.22	K.GFSFSFPIEVK.N	[74-84]	Used	Used
[R].LGIHSSDSGVYDKDGR.[F]		FALSE	2.72808e-05	0.000572698	1	1	2	Q9CAB8	Q9CAB8 [88-103]		1	1705.81	0	4.319	0.728649	0	85504.1	19797.6		High	Peak Found	High	0.0001305	5.054e-06	4.5	59.58	R.LGIHSSDSGVYDKDGR.F	[88-103]	Used	Used
[R].AVYDGSLFEQLEK.[Q]		FALSE	9.77026e-05	0.000572698	1	1	5	Q9CAB8	Q9CAB8 [173-185]		0	1498.74	0	7.515	0.289265	0	150753	20059.5		High	High	High	0.0001305	1.846e-05	4.49	138.22	R.AVYDGSLFEQLEK.Q	[173-185]	Used	Used
[K].DGIVYPSETFQGFR.[A]		FALSE	0.0160018	0.00268212	1	2	1	Q9CAB8	Q9CAB8 [32-45]		0	1615.78	0	9.719	0.0873069	0	33847.7	3482.6		High	Peak Found	High	0.0005646	0.00348	3.19	134.18	K.DGIVYPSETFQGFR.A	[32-45]	Used	Used
[RK].HVAFFDR.[N]		FALSE	0.0178045	0.0029934	1	2	4	Q9CAB8	Q9CAB8 [23-29]		0	891.447	0	5.38	0.556846	0	94822.2	17623.5		High	High	High	0.0006192	0.003906	2.5	83.78	K.HVAFFDR.N	[23-29]	Used	Used
[R].NKDGIVYPSETFQGFR.[A]		FALSE	0.0359051	0.00462251	1	2	1	Q9CAB8	Q9CAB8 [30-45]		1	1857.91	0	2.454	0.997269	0	40757.5	16608.3		High	Peak Found	High	0.0009067	0.008163	3.17	118.26	R.NKDGIVYPSETFQGFR.A	[30-45]	Used	Used
P46422	Glutathione S-transferase F2 OS=Arabidopsis thaliana OX=3702 GN=GSTF2 PE=1 SV=3	0	FALSE	22.524	30	6	15	2	212	24.1	6.35	43.01	6	4	0.955	0.231916	22.1	348978	336986	High	High	1		-0.0664274	0.0199966
Annotated Sequence	Modifications	Contaminant	Qvality PEP	Qvality q-value	# Protein Groups	# Proteins	# PSMs	Master Protein Accessions	Positions in Master Proteins	Modifications in Master Proteins	# Missed Cleavages	Theo. MH+ [Da]	# Razor Quan Results	Abundance Ratio: (F4) / (F3)	Abundance Ratio Adj. P-Value: (F4) / (F3)	Abundance Ratio Variability [%]: (F4) / (F3)	Abundances (Grouped): F4	Abundances (Grouped): F3	Quan Info	Found in Sample: [S4] F4: Sample	Found in Sample: [S3] F3: Sample	Confidence (by Search Engine): Sequest HT	Percolator q-Value (by Search Engine): Sequest HT	Percolator PEP (by Search Engine): Sequest HT	XCorr (by Search Engine): Sequest HT	Top Apex RT [min]	Sequence in Protein	Positions in Proteins	Quan Usage	Quan Ratio Usage
[RK].LKELAPYDPDWYYIR.[A]		FALSE	0.000822555	0.000572698	2	3	6	Q9LF30; Q9SGA6	Q9LF30 [43-57]; Q9SGA6 [43-57]		1	1941.97	0	1.009	0.508655	0	30309.9	30035.1	Shared	High	High	High	0.0001305	0.0001608	3.27	141.09	K.LKELAPYDPDWYYIR.A	[43-57]	Not Used	Not Used
[K].ELAPYDPDWYYIR.[A]		FALSE	0.000319862	0.000572698	2	3	2	Q9LF30; Q9SGA6	Q9LF30 [45-57]; Q9SGA6 [45-57]		0	1700.8	0	5.028	0.595303	0	30821.3	6130.01	Shared	High	Peak Found	High	0.0001305	6.155e-05	3.62	148.31	K.ELAPYDPDWYYIR.A	[45-57]	Not Used	Not Used
[K].IELPTWTDIVK.[T]		FALSE	0.0037128	0.00166669	1	1	1	Q9SGA6	Q9SGA6 [29-39]		0	1314.73	0	6.752	0.386947	0	23785.9	3522.99		High	Peak Found	High	0.0003407	0.0007644	1.6	159.27	K.IELPTWTDIVK.T	[29-39]	Used	Used
[R].DLDQVAGR.[I]		FALSE	0.00881856	0.00190722	2	3	1	Q9LF30; Q9SGA6	Q9LF30 [131-138]; Q9SGA6 [131-138]		0	873.442	0						No Quan Values	High	Not Found	High	0.0004264	0.001872	2.24		R.DLDQVAGR.I	[131-138]	Not Used	Not Used
[K].DVSPHDFVK.[A]		FALSE	0.0629807	0.00545717	2	2	2	Q9LF30; Q9SGA6	Q9LF30 [9-17]; Q9SGA6 [9-17]		0	1043.52	0	3.26	0.83179	0	143467	44014.2	Shared	High	High	High	0.00142	0.01436	1.76	71.26	K.DVSPHDFVK.A	[9-17]	Not Used	Not Used
P48491	Triosephosphate isomerase, cytosolic OS=Arabidopsis thaliana OX=3702 GN=CTIMC PE=1 SV=2	0	FALSE	22.577	32	6	11	6	254	27.2	5.5	36.56	6	0	6.266	0.244778	85.75	1.01604e+06	261783	High	High	1		2.64754	-0.79699
Annotated Sequence	Modifications	Contaminant	Qvality PEP	Qvality q-value	# Protein Groups	# Proteins	# PSMs	Master Protein Accessions	Positions in Master Proteins	Modifications in Master Proteins	# Missed Cleavages	Theo. MH+ [Da]	# Razor Quan Results	Abundance Ratio: (F4) / (F3)	Abundance Ratio Adj. P-Value: (F4) / (F3)	Abundance Ratio Variability [%]: (F4) / (F3)	Abundances (Grouped): F4	Abundances (Grouped): F3	Quan Info	Found in Sample: [S4] F4: Sample	Found in Sample: [S3] F3: Sample	Confidence (by Search Engine): Sequest HT	Percolator q-Value (by Search Engine): Sequest HT	Percolator PEP (by Search Engine): Sequest HT	XCorr (by Search Engine): Sequest HT	Top Apex RT [min]	Sequence in Protein	Positions in Proteins	Quan Usage	Quan Ratio Usage
[K].LNVVVISAR.[I]		FALSE	0.00234204	0.000987479	1	1	5	Q9T076	Q9T076 [124-132]		0	970.604	0	2.827	0.944245	0	56609	20023.9		High	High	High	0.0001991	0.0004708	2.55	98.42	K.LNVVVISAR.I	[124-132]	Used	Used
[K].FNVGGSGAWVTNPPENYESWSGK.[N]		FALSE	0.00453283	0.00166669	1	1	9	Q9T076	Q9T076 [31-53]		0	2483.13	0	6.103	0.481702	0	25824.4	4231.12		High	Peak Found	High	0.0003407	0.0009407	3.76	138.25	K.FNVGGSGAWVTNPPENYESWSGK.N	[31-53]	Used	Used
[K].RVDDGDSEISLDR.[Y]		FALSE	0.00701957	0.00166669	1	1	5	Q9T076	Q9T076 [92-104]		1	1476.69	0	5.756	0.473432	0	30385.5	5278.58		High	High	High	0.0003948	0.001478	3.44	69.53	K.RVDDGDSEISLDR.Y	[92-104]	Used	Used
[K].FNVGGSGAWVTNPPENYESWSGK.[N]	2xDeamidated [N2; N12]	FALSE	0.0826678	0.00598748	1	1	1	Q9T076	Q9T076 [31-53]		0	2485.09	0						No Quan Values	High	Not Found	High	0.00163	0.0187	3.51		K.FNVGGSGAWVTNPPENYESWSGK.N	[31-53]	Not Used	Not Used
[K].FNVGGSGAWVTNPPENYESWSGK.[N]	1xDeamidated [N16]	FALSE	0.0933164	0.00664992	1	1	1	Q9T076	Q9T076 [31-53]		0	2484.11	0	100	5.76991e-17		38707.9			High	Not Found	High	0.001745	0.02094	4.21	138.38	K.FNVGGSGAWVTNPPENYESWSGK.N	[31-53]	Used	Used
Q7G191	Benzaldehyde dehydrogenase (NAD(+)) OS=Arabidopsis thaliana OX=3702 GN=AAO4 PE=1 SV=2	0	FALSE	14.358	6	6	11	6	1337	147.2	6.33	18.09	6	0	5.588	0.374043	46.06	259274	35141.9	High	Peak Found	1		2.48233	-0.747256
Annotated Sequence	Modifications	Contaminant	Qvality PEP	Qvality q-value	# Protein Groups	# Proteins	# PSMs	Master Protein Accessions	Positions in Master Proteins	Modifications in Master Proteins	# Missed Cleavages	Theo. MH+ [Da]	# Razor Quan Results	Abundance Ratio: (F4) / (F3)	Abundance Ratio Adj. P-Value: (F4) / (F3)	Abundance Ratio Variability [%]: (F4) / (F3)	Abundances (Grouped): F4	Abundances (Grouped): F3	Quan Info	Found in Sample: [S4] F4: Sample	Found in Sample: [S3] F3: Sample	Confidence (by Search Engine): Sequest HT	Percolator q-Value (by Search Engine): Sequest HT	Percolator PEP (by Search Engine): Sequest HT	XCorr (by Search Engine): Sequest HT	Top Apex RT [min]	Sequence in Protein	Positions in Proteins	Quan Usage	Quan Ratio Usage
[K].LSVANGAWIDK.[S]	1xDeamidated [N5]	FALSE	0.00776623	0.00190722	1	1	1	Q9S7T8	Q9S7T8 [92-102]		0	1174.61	0	5.182	0.582178	0	51690.2	9974.05		High	Peak Found	High	0.0004264	0.001646	2.61	106.48	K.LSVANGAWIDK.S	[92-102]	Used	Used
Q9SF40	60S ribosomal protein L4-1 OS=Arabidopsis thaliana OX=3702 GN=RPL4A PE=1 SV=1	0	FALSE	19.646	16	6	15	2	406	44.7	10.35	33.09	6	4	1.181	0.461694	64.65	227580	157984	High	Peak Found	1		0.240009	-0.0722499
Annotated Sequence	Modifications	Contaminant	Qvality PEP	Qvality q-value	# Protein Groups	# Proteins	# PSMs	Master Protein Accessions	Positions in Master Proteins	Modifications in Master Proteins	# Missed Cleavages	Theo. MH+ [Da]	# Razor Quan Results	Abundance Ratio: (F4) / (F3)	Abundance Ratio Adj. P-Value: (F4) / (F3)	Abundance Ratio Variability [%]: (F4) / (F3)	Abundances (Grouped): F4	Abundances (Grouped): F3	Quan Info	Found in Sample: [S4] F4: Sample	Found in Sample: [S3] F3: Sample	Confidence (by Search Engine): Sequest HT	Percolator q-Value (by Search Engine): Sequest HT	Percolator PEP (by Search Engine): Sequest HT	XCorr (by Search Engine): Sequest HT	Top Apex RT [min]	Sequence in Protein	Positions in Proteins	Quan Usage	Quan Ratio Usage
[K].LLGDVTIANGGVMPNIHNLLLPK.[K]	1xDeamidated [N]	FALSE	3.58083e-05	0.000572698	1	3	4	O81826	O81826 [98-120]		0	2400.33	0	5.032	0.616262	0	33762	6710.03		High	Peak Found	High	0.0001305	6.653e-06	2.97	169.16	K.LLGDVTIANGGVMPNIHNLLLPK.K	[98-120]	Used	Used
[RK].AGLQFPVGR.[IV]		FALSE	0.000836444	0.000572698	3	11	3	O81826; O04848; Q9C944	O81826 [23-31]; O04848 [29-37]; Q9C944 [33-41]		0	944.531	0	2.315	0.925353	0	315783	136413	Shared	High	High	High	0.0001305	0.0001638	2.77	103.5	K.AGLQFPVGR.I	[23-31]	Not Used	Not Used
[R].HIQLAVR.[N]		FALSE	0.00375785	0.00166669	2	6	10	O81826; O04848	O81826 [84-90]; O04848 [90-96]		0	836.51	0	2.116	0.941598	0	312348	147610	Shared	High	High	High	0.0003407	0.0007728	1.8	61.36	R.HIQLAVR.N	[84-90]	Not Used	Not Used
Q38907	Probable xyloglucan endotransglucosylase/hydrolase protein 25 OS=Arabidopsis thaliana OX=3702 GN=XTH25 PE=2 SV=2	0	FALSE	26.544	25	6	22	6	284	32.6	8.13	55.76	6	0	1.199	0.475326	28.61	1.16864e+06	794846	High	High	1		0.261832	-0.0788192
Annotated Sequence	Modifications	Contaminant	Qvality PEP	Qvality q-value	# Protein Groups	# Proteins	# PSMs	Master Protein Accessions	Positions in Master Proteins	Modifications in Master Proteins	# Missed Cleavages	Theo. MH+ [Da]	# Razor Quan Results	Abundance Ratio: (F4) / (F3)	Abundance Ratio Adj. P-Value: (F4) / (F3)	Abundance Ratio Variability [%]: (F4) / (F3)	Abundances (Grouped): F4	Abundances (Grouped): F3	Quan Info	Found in Sample: [S4] F4: Sample	Found in Sample: [S3] F3: Sample	Confidence (by Search Engine): Sequest HT	Percolator q-Value (by Search Engine): Sequest HT	Percolator PEP (by Search Engine): Sequest HT	XCorr (by Search Engine): Sequest HT	Top Apex RT [min]	Sequence in Protein	Positions in Proteins	Quan Usage	Quan Ratio Usage
[R].TSDLVALSGGHTFGR.[A]		FALSE	0.000317103	0.000572698	1	1	6	P24102	P24102 [189-203]		0	1517.77	0	3.219	0.905762	0	67283.9	20904.2		High	High	High	0.0001305	6.093e-05	3.27	102.99	R.TSDLVALSGGHTFGR.A	[189-203]	Used	Used
[R].MGNLRPLTGTQGEIR.[Q]		FALSE	1.50601e-06	0.000572698	1	1	2	P24102	P24102 [312-326]		0	1642.87	0	3.711	0.837035	0	68989.2	18590.2		High	Peak Found	High	0.0001305	2.663e-07	2.2	87.05	R.MGNLRPLTGTQGEIR.Q	[312-326]	Used	Used
[R].AFIDAMIR.[M]		FALSE	0.00356693	0.00166669	1	1	1	P24102	P24102 [304-311]		0	936.497	0	4.997	0.608029	0	55995.2	11205.9		High	Peak Found	High	0.0003407	0.000733	2.55	121.64	R.AFIDAMIR.M	[304-311]	Used	Used
[R].GFNVIDR.[M]		FALSE	0.0324879	0.00462251	1	1	7	P24102	P24102 [105-111]		0	820.431	0	6.138	0.4361	0	60965.7	9932.98		High	High	High	0.0009067	0.007335	2.04	79.45	R.GFNVIDR.M	[105-111]	Used	Used
O48646	Probable phospholipid hydroperoxide glutathione peroxidase 6, mitochondrial OS=Arabidopsis thaliana OX=3702 GN=GPX6 PE=2 SV=2	0	FALSE	22.454	29	6	19	6	232	25.6	9.35	55.37	6	0	4.373	0.635938	22.56	1.10981e+06	245807	High	High	1		2.12862	-0.640779
Annotated Sequence	Modifications	Contaminant	Qvality PEP	Qvality q-value	# Protein Groups	# Proteins	# PSMs	Master Protein Accessions	Positions in Master Proteins	Modifications in Master Proteins	# Missed Cleavages	Theo. MH+ [Da]	# Razor Quan Results	Abundance Ratio: (F4) / (F3)	Abundance Ratio Adj. P-Value: (F4) / (F3)	Abundance Ratio Variability [%]: (F4) / (F3)	Abundances (Grouped): F4	Abundances (Grouped): F3	Quan Info	Found in Sample: [S4] F4: Sample	Found in Sample: [S3] F3: Sample	Confidence (by Search Engine): Sequest HT	Percolator q-Value (by Search Engine): Sequest HT	Percolator PEP (by Search Engine): Sequest HT	XCorr (by Search Engine): Sequest HT	Top Apex RT [min]	Sequence in Protein	Positions in Proteins	Quan Usage	Quan Ratio Usage
[K].GFILDGFPR.[T]		FALSE	0.000373748	0.000572698	2	2	7	Q9FK35; O82514	Q9FK35 [114-122]; O82514 [113-121]		0	1021.55	0	2.597	0.984575	0	39775.1	15317.4	Shared	High	High	High	0.0001305	7.21e-05	2.88	141.15	K.GFILDGFPR.T	[114-122]	Not Used	Not Used
[K].VPGVDDLTGEPLIQR.[K]		FALSE	0.000301034	0.000572698	1	1	1	Q9FK35	Q9FK35 [180-194]		0	1608.86	0	4.454	0.72147	0	32185.3	7225.93		High	Peak Found	High	0.0001991	0.0002035	3	123.45	K.VPGVDDLTGEPLIQR.K	[180-194]	Used	Used
[R].LVFIGPPGSGK.[G]		FALSE	0.0582554	0.00545717	1	1	3	Q9FK35	Q9FK35 [37-47]		0	1071.62	0	3.483	0.875484	0	47270.3	13573.2		High	High	High	0.001365	0.01323	2.37	107.58	R.LVFIGPPGSGK.G	[37-47]	Used	Used
Q9LYP6	Embryo-specific protein ATS3 OS=Arabidopsis thaliana OX=3702 GN=ATS3 PE=2 SV=1	0	FALSE	33.804	33	6	40	6	213	23.1	6.74	148.4	6	0	1.543	0.748525	32.34	1.99172e+06	1.42293e+06	High	High	1		0.625738	-0.188366
Annotated Sequence	Modifications	Contaminant	Qvality PEP	Qvality q-value	# Protein Groups	# Proteins	# PSMs	Master Protein Accessions	Positions in Master Proteins	Modifications in Master Proteins	# Missed Cleavages	Theo. MH+ [Da]	# Razor Quan Results	Abundance Ratio: (F4) / (F3)	Abundance Ratio Adj. P-Value: (F4) / (F3)	Abundance Ratio Variability [%]: (F4) / (F3)	Abundances (Grouped): F4	Abundances (Grouped): F3	Quan Info	Found in Sample: [S4] F4: Sample	Found in Sample: [S3] F3: Sample	Confidence (by Search Engine): Sequest HT	Percolator q-Value (by Search Engine): Sequest HT	Percolator PEP (by Search Engine): Sequest HT	XCorr (by Search Engine): Sequest HT	Top Apex RT [min]	Sequence in Protein	Positions in Proteins	Quan Usage	Quan Ratio Usage
[K].KVLQFAGIDDVFTSSR.[G]		FALSE	0.000644065	0.000572698	2	4	1	P49688; Q93VB8	P49688 [206-221]; Q93VB8 [205-220]		1	1782.94	0						No Quan Values	Not Found	High	High	0.0001305	0.0001251	2.63		K.KVLQFAGIDDVFTSSR.G	[206-221]	Not Used	Not Used
[K].TYGFLTPEFWK.[E]		FALSE	0.00134658	0.000987479	2	4	2	P49688; Q93VB8	P49688 [241-251]; Q93VB8 [240-250]		0	1388.69	0						No Quan Values	Not Found	High	High	0.0001991	0.0002661	2.65		K.TYGFLTPEFWK.E	[241-251]	Not Used	Not Used
[K].ALSTSKPDPVVEDQA.[-]		FALSE	0.00307845	0.00143413	1	1	4	P49688	P49688 [271-285]		0	1556.78	0	1.641	0.99391	0	119500	72804.4		High	High	High	0.0002813	0.0006266	4.14	70.64	K.ALSTSKPDPVVEDQA.-	[271-285]	Used	Used
Q9LD57	Phosphoglycerate kinase 1, chloroplastic OS=Arabidopsis thaliana OX=3702 GN=PGK1 PE=1 SV=1	0	FALSE	23.959	15	6	14	6	481	50.1	6.24	39.33	6	0	1.641	0.793881	20.61	295255	138247	High	High	1		0.714575	-0.215109
Annotated Sequence	Modifications	Contaminant	Qvality PEP	Qvality q-value	# Protein Groups	# Proteins	# PSMs	Master Protein Accessions	Positions in Master Proteins	Modifications in Master Proteins	# Missed Cleavages	Theo. MH+ [Da]	# Razor Quan Results	Abundance Ratio: (F4) / (F3)	Abundance Ratio Adj. P-Value: (F4) / (F3)	Abundance Ratio Variability [%]: (F4) / (F3)	Abundances (Grouped): F4	Abundances (Grouped): F3	Quan Info	Found in Sample: [S4] F4: Sample	Found in Sample: [S3] F3: Sample	Confidence (by Search Engine): Sequest HT	Percolator q-Value (by Search Engine): Sequest HT	Percolator PEP (by Search Engine): Sequest HT	XCorr (by Search Engine): Sequest HT	Top Apex RT [min]	Sequence in Protein	Positions in Proteins	Quan Usage	Quan Ratio Usage
[K].TNVVGTLNMLGLAK.[R]	2xDeamidated [N2; N8]; 1xOxidation [M9]	FALSE	0.110444	0.00819423	1	2	4	Q9LZI2	Q9LZI2 [208-221]		0	1448.77	0	3.648	0.849414	0	36121.6	9902.57		High	Peak Found	High	0.002129	0.02465	2.28	173.93	K.TNVVGTLNMLGLAK.R	[208-221]	Used	Used
P93819	Malate dehydrogenase 1, cytoplasmic OS=Arabidopsis thaliana OX=3702 GN=MDH1 PE=1 SV=2	0	FALSE	23.173	26	6	18	6	332	35.5	6.55	42.27	6	0	1.665	0.807192	74.84	1.11868e+06	311469	High	High	1		0.735522	-0.221414
Annotated Sequence	Modifications	Contaminant	Qvality PEP	Qvality q-value	# Protein Groups	# Proteins	# PSMs	Master Protein Accessions	Positions in Master Proteins	Modifications in Master Proteins	# Missed Cleavages	Theo. MH+ [Da]	# Razor Quan Results	Abundance Ratio: (F4) / (F3)	Abundance Ratio Adj. P-Value: (F4) / (F3)	Abundance Ratio Variability [%]: (F4) / (F3)	Abundances (Grouped): F4	Abundances (Grouped): F3	Quan Info	Found in Sample: [S4] F4: Sample	Found in Sample: [S3] F3: Sample	Confidence (by Search Engine): Sequest HT	Percolator q-Value (by Search Engine): Sequest HT	Percolator PEP (by Search Engine): Sequest HT	XCorr (by Search Engine): Sequest HT	Top Apex RT [min]	Sequence in Protein	Positions in Proteins	Quan Usage	Quan Ratio Usage
[R].TPILVATDVAAR.[G]		FALSE	7.28555e-05	0.000572698	1	3	1	Q84W89	Q84W89 [469-480]		0	1226.71	0	1.078	0.522867	0	11807.3	10951		Peak Found	High	High	0.0001305	1.368e-05	3.82	101.77	R.TPILVATDVAAR.G	[469-480]	Used	Used
[R].NRPAASEPVAPLPANDR.[V]		FALSE	0.00627449	0.00166669	1	1	2	Q84W89	Q84W89 [37-53]		0	1774.92	0	2.795	0.966045	0	25567.7	9149.19		High	Peak Found	High	0.0003948	0.001315	3.47	68.41	R.NRPAASEPVAPLPANDR.V	[37-53]	Used	Used
Q43314	Glutamate dehydrogenase 1 OS=Arabidopsis thaliana OX=3702 GN=GDH1 PE=2 SV=1	0	FALSE	21.887	21	6	16	4	411	44.5	6.86	31.95	6	1	1.74	0.864687	60.49	170330	85611	High	High	1		0.799087	-0.240549
Annotated Sequence	Modifications	Contaminant	Qvality PEP	Qvality q-value	# Protein Groups	# Proteins	# PSMs	Master Protein Accessions	Positions in Master Proteins	Modifications in Master Proteins	# Missed Cleavages	Theo. MH+ [Da]	# Razor Quan Results	Abundance Ratio: (F4) / (F3)	Abundance Ratio Adj. P-Value: (F4) / (F3)	Abundance Ratio Variability [%]: (F4) / (F3)	Abundances (Grouped): F4	Abundances (Grouped): F3	Quan Info	Found in Sample: [S4] F4: Sample	Found in Sample: [S3] F3: Sample	Confidence (by Search Engine): Sequest HT	Percolator q-Value (by Search Engine): Sequest HT	Percolator PEP (by Search Engine): Sequest HT	XCorr (by Search Engine): Sequest HT	Top Apex RT [min]	Sequence in Protein	Positions in Proteins	Quan Usage	Quan Ratio Usage
[K].IATPVNWKPDQPVVISPAVSDEEAK.[K]		FALSE	9.30935e-06	0.000572698	1	1	6	O04005	O04005 [167-191]		0	2690.4	0	2.389	0.924352	0	1.156e+06	483941		High	High	High	0.0001305	1.697e-06	3.44	125.48	K.IATPVNWKPDQPVVISPAVSDEEAK.K	[167-191]	Used	Used
[K].IATPVNWKPDQPVVISPAVSDEEAKK.[M]		FALSE	5.77536e-05	0.000572698	1	1	1	O04005	O04005 [167-192]		1	2818.5	0	1.872	0.973321	0	182071	97251.4		Peak Found	High	High	0.0001305	1.08e-05	4.54	118.31	K.IATPVNWKPDQPVVISPAVSDEEAKK.M	[167-192]	Used	Used
[K].VNYPIIADPNKEIIPQLNMIDPIENGPSR.[A]	2xDeamidated [N/Q]	FALSE	0.000182538	0.000572698	1	1	8	O04005	O04005 [94-122]		1	3262.67	0	2.198	0.961961	0	17297.4	7868.15		High	High	High	0.0001305	3.475e-05	3.22	162.5	K.VNYPIIADPNKEIIPQLNMIDPIENGPSR.A	[94-122]	Used	Used
[K].VNYPIIADPNKEIIPQLNMIDPIENGPSR.[A]	3xDeamidated [N18; N25; N/Q]	FALSE	0.000326863	0.000572698	1	1	2	O04005	O04005 [94-122]		1	3263.65	0	100	5.76991e-17		27035			High	High	High	0.0001305	6.288e-05	4.78	162.46	K.VNYPIIADPNKEIIPQLNMIDPIENGPSR.A	[94-122]	Used	Used
[K].VNYPIIADPNKEIIPQLNMIDPIENGPSR.[A]	1xDeamidated [N/Q]	FALSE	4.81938e-06	0.000572698	1	1	10	O04005	O04005 [94-122]		1	3261.68	0	3.219	0.813812	0	686378	213257		High	High	High	0.0001305	8.7e-07	5.04	166.67	K.VNYPIIADPNKEIIPQLNMIDPIENGPSR.A	[94-122]	Used	Used
[R].ALDSLLMASK.[H]		FALSE	0.000461568	0.000572698	1	1	5	O04005	O04005 [153-162]		0	1048.57	0	0.649	0.676143	0	282815	436027		High	High	High	0.0001305	8.916e-05	2.58	117.34	R.ALDSLLMASK.H	[153-162]	Used	Used
[K].EIIPQLNMIDPIENGPSR.[A]	1xDeamidated [N14]	FALSE	1.69097e-05	0.000572698	1	1	6	O04005	O04005 [105-122]		0	2037.03	0	100	5.76991e-17		49295			High	Not Found	High	0.0001305	3.107e-06	2.52	155.43	K.EIIPQLNMIDPIENGPSR.A	[105-122]	Used	Used
[R].ALDSLLMASK.[H]	1xOxidation [M7]	FALSE	0.00105952	0.000987479	1	1	6	O04005	O04005 [153-162]		0	1064.57	0	1.092	0.767768	0	72493.7	66371.3		High	High	High	0.0001991	0.0002078	3.56	103.5	R.ALDSLLMASK.H	[153-162]	Used	Used
[K].LSFLYPSTTGR.[N]		FALSE	0.0019439	0.000987479	1	1	4	O04005	O04005 [135-145]		0	1241.65	0	1.012	0.898399	0	324791	320863		High	High	High	0.0001991	0.0003888	3.23	119.23	K.LSFLYPSTTGR.N	[135-145]	Used	Used
[K].LHDYFANSWTVLFSHPGDFTPVCTTELGAMAK.[Y]	1xCarbamidomethyl [C23]	FALSE	0.00134658	0.000987479	1	1	2	O04005	O04005 [24-55]		0	3612.69	0						No Quan Values	Not Found	High	High	0.0001991	0.0002658	4.47		K.LHDYFANSWTVLFSHPGDFTPVCTTELGAMAK.Y	[24-55]	Not Used	Not Used
[K].LLGLSCDDVQSHK.[D]	1xCarbamidomethyl [C6]	FALSE	0.00169823	0.000987479	1	1	2	O04005	O04005 [67-79]		0	1471.72	0	100	5.76991e-17		29316			High	Not Found	High	0.0001991	0.0003373	2.65	88.53	K.LLGLSCDDVQSHK.D	[67-79]	Used	Used
[K].VNYPIIADPNK.[E]		FALSE	0.00156809	0.000987479	1	1	1	O04005	O04005 [94-104]		0	1243.67	0	1.744	0.993138	0	372038	213321		High	Peak Found	High	0.0001991	0.0003116	3.19	96.41	K.VNYPIIADPNK.E	[94-104]	Used	Used
[K].VNYPIIADPNKEIIPQLNMIDPIENGPSR.[A]	1xDeamidated [N/Q]; 1xOxidation [M19]	FALSE	0.00255534	0.000987479	1	1	7	O04005	O04005 [94-122]		1	3277.68	0	4.545	0.668443	0	97227.4	21392.8		High	High	High	0.0001991	0.0005165	3.13	155.99	K.VNYPIIADPNKEIIPQLNMIDPIENGPSR.A	[94-122]	Used	Used
[K].IKLSFLYPSTTGR.[N]		FALSE	0.00417516	0.00166669	1	1	3	O04005	O04005 [133-145]		1	1482.83	0	0.01	5.76991e-17			27066.7		Not Found	High	High	0.0003407	0.0008637	1.99	125.55	K.IKLSFLYPSTTGR.N	[133-145]	Used	Used
[K].DIEAFNHGSK.[V]		FALSE	0.00525044	0.00166669	1	1	7	O04005	O04005 [84-93]		0	1117.53	0	2.557	0.903834	0	373666	146150		High	High	High	0.0003948	0.001096	3.08	58.47	K.DIEAFNHGSK.V	[84-93]	Used	Used
[K].MFPQGFK.[T]		FALSE	0.00664916	0.00166669	1	1	19	O04005	O04005 [193-199]		0	854.423	0	1.423	0.977289	0	141640	99502.1		High	High	High	0.0003948	0.001401	1.98	95.97	K.MFPQGFK.T	[193-199]	Used	Used
[K].YAHEFDKR.[G]		FALSE	0.00442188	0.00166669	1	1	16	O04005	O04005 [56-63]		1	1065.51	0	1.579	0.997269	0	231051	146326		High	High	High	0.0003407	0.0009166	2.73	40.45	K.YAHEFDKR.G	[56-63]	Used	Used
[K].MFPQGFK.[T]	1xOxidation [M1]	FALSE	0.0107664	0.00190722	1	1	6	O04005	O04005 [193-199]		0	870.418	0	2.615	0.99001	0	33729	12896.2		High	High	High	0.0004264	0.002307	1.78	83.12	K.MFPQGFK.T	[193-199]	Used	Used
[R].NMDEVLR.[A]		FALSE	0.010874	0.00190722	1	1	4	O04005	O04005 [146-152]		0	876.424	0	1.622	0.999906	0	571835	352645		High	High	High	0.0004264	0.002329	2.4	71.71	R.NMDEVLR.A	[146-152]	Used	Used
[K].IATPVNWKPDQPVVISPAVSDEEAK.[K]	1xDeamidated [Q11]	FALSE	0.0137414	0.00190722	1	1	1	O04005	O04005 [167-191]		0	2691.39	0						No Quan Values	High	Not Found	High	0.0004264	0.002981	2.62		K.IATPVNWKPDQPVVISPAVSDEEAK.K	[167-191]	Not Used	Not Used
[R].ALHIVGPDSK.[I]		FALSE	0.00956981	0.00190722	1	1	2	O04005	O04005 [123-132]		0	1036.58	0	100	5.76991e-17		1.0429e+06			High	Not Found	High	0.0004264	0.002041	2.95	64.92	R.ALHIVGPDSK.I	[123-132]	Used	Used
[K].TADLPSKK.[G]		FALSE	0.0185876	0.0029934	1	1	4	O04005	O04005 [200-207]		1	859.488	0	1.312	0.878491	0	80877.7	61624.8		High	High	High	0.0006192	0.004086	2.8	27.91	K.TADLPSKK.G	[200-207]	Used	Used
[K].KMFPQGFK.[T]		FALSE	0.0638098	0.00573653	1	1	2	O04005	O04005 [192-199]		1	982.518	0	3.323	0.898399	0	83849.8	25233.2		High	High	High	0.001478	0.01454	2.4	81.5	K.KMFPQGFK.T	[192-199]	Used	Used
[R].NMDEVLR.[A]	1xOxidation [M2]	FALSE	0.0804789	0.00598748	1	1	5	O04005	O04005 [146-152]		0	892.419	0	1.356	0.796414	0	42956.4	31679.8		High	High	High	0.00163	0.01818	2.22	70.59	R.NMDEVLR.A	[146-152]	Used	Used
P19366	ATP synthase subunit beta, chloroplastic OS=Arabidopsis thaliana OX=3702 GN=atpB PE=1 SV=2	0	FALSE	18.888	18	6	16	5	498	53.9	5.5	46.03	6	0	3.463	0.865884	2.64	136448	14928.2	High	Peak Found	1		1.79202	-0.539452
Annotated Sequence	Modifications	Contaminant	Qvality PEP	Qvality q-value	# Protein Groups	# Proteins	# PSMs	Master Protein Accessions	Positions in Master Proteins	Modifications in Master Proteins	# Missed Cleavages	Theo. MH+ [Da]	# Razor Quan Results	Abundance Ratio: (F4) / (F3)	Abundance Ratio Adj. P-Value: (F4) / (F3)	Abundance Ratio Variability [%]: (F4) / (F3)	Abundances (Grouped): F4	Abundances (Grouped): F3	Quan Info	Found in Sample: [S4] F4: Sample	Found in Sample: [S3] F3: Sample	Confidence (by Search Engine): Sequest HT	Percolator q-Value (by Search Engine): Sequest HT	Percolator PEP (by Search Engine): Sequest HT	XCorr (by Search Engine): Sequest HT	Top Apex RT [min]	Sequence in Protein	Positions in Proteins	Quan Usage	Quan Ratio Usage
[K].NAVVTVPAYFNDSQR.[Q]		FALSE	0.000589048	0.000572698	3	6	5	Q9LHA8; Q9S9N1; P22953	Q9LHA8 [145-159]; Q9S9N1 [144-158]; P22953 [145-159]		0	1680.83	0	1.955	0.96464	0	255147	130522	Shared	High	High	High	0.0001305	0.0001143	3.08	117.47	K.NAVVTVPAYFNDSQR.Q	[145-159]	Not Used	Not Used
[K].NQVAMNPVNTVFDAK.[R]		FALSE	0.00025973	0.000572698	1	3	2	P22953	P22953 [60-74]		0	1647.82	0	6.587	0.357692	0	49313	7485.99		High	Peak Found	High	0.0001305	4.982e-05	2.69	121.93	K.NQVAMNPVNTVFDAK.R	[60-74]	Used	Used
[K].NQVAMNPVNTVFDAK.[R]	1xOxidation [M5]	FALSE	0.000285766	0.000572698	1	3	2	P22953	P22953 [60-74]		0	1663.81	0	100	5.76991e-17		27147.4			High	Not Found	High	0.0001305	5.492e-05	4.32	108.03	K.NQVAMNPVNTVFDAK.R	[60-74]	Used	Used
[K].NALENYAYNMR.[N]	1xOxidation [M10]	FALSE	0.000284529	0.000572698	2	4	4	Q9LHA8; P22953	Q9LHA8 [546-556]; P22953 [546-556]		0	1374.61	0	5.175	0.578654	0	48911.2	9451.73	Shared	High	High	High	0.0001305	5.463e-05	3.35	85.61	K.NALENYAYNMR.N	[546-556]	Not Used	Not Used
[K].NALENYAYNMR.[N]		FALSE	0.000418093	0.000572698	2	4	2	Q9LHA8; P22953	Q9LHA8 [546-556]; P22953 [546-556]		0	1358.62	0	2.447	0.919939	0	248320	101482	Shared	High	High	High	0.0001305	8.082e-05	3.52	109.12	K.NALENYAYNMR.N	[546-556]	Not Used	Not Used
[K].MYQGAGGEAGGPGASGMDDDAPPASGGAGPK.[I]		FALSE	2.05287e-07	0.000572698	1	1	11	P22953	P22953 [616-646]		0	2733.15	0	10.111	0.116274	0	84114.7	8319.15		High	High	High	0.0001305	3.52e-08	7.4	79.14	K.MYQGAGGEAGGPGASGMDDDAPPASGGAGPK.I	[616-646]	Used	Used
[R].IINEPTAAAIAYGLDKK.[AG]		FALSE	0.000201792	0.000572698	5	8	2	Q9LHA8; Q9S9N1; Q39043; Q9LKR3; P22953	Q9LHA8 [176-192]; Q9S9N1 [175-191]; Q39043 [204-220]; Q9LKR3 [204-220]; P22953 [176-192]		1	1787.99	0	1.22	0.939328	0	136123	111572	Shared	High	Peak Found	High	0.0001305	3.858e-05	5.1	119.32	R.IINEPTAAAIAYGLDKK.A	[176-192]	Not Used	Not Used
[R].IINEPTAAAIAYGLDK.[K]		FALSE	4.42554e-07	0.000572698	5	8	5	Q9LHA8; Q9S9N1; Q39043; Q9LKR3; P22953	Q9LHA8 [176-191]; Q9S9N1 [175-190]; Q39043 [204-219]; Q9LKR3 [204-219]; P22953 [176-191]		0	1659.9	0	4.289	0.639606	0	304299	70954.8	Shared	High	High	High	0.0001305	7.69e-08	4.91	129.64	R.IINEPTAAAIAYGLDK.K	[176-191]	Not Used	Not Used
[K].ATAGDTHLGGEDFDNR.[ML]		FALSE	4.53214e-06	0.000572698	3	6	9	Q9LHA8; Q9S9N1; P22953	Q9LHA8 [227-242]; Q9S9N1 [226-241]; P22953 [227-242]		0	1675.73	0	2.011	0.959731	0	1.4403e+06	716098	Shared	High	High	High	0.0001305	8.17e-07	4.78	67.75	K.ATAGDTHLGGEDFDNR.M	[227-242]	Not Used	Not Used
[K].VQQLLQDFFNGK.[E]	1xDeamidated [N10]	FALSE	0.000137433	0.000572698	2	4	9	Q9LHA8; P22953	Q9LHA8 [352-363]; P22953 [352-363]		0	1437.74	0	2.604	0.974754	0	45645.3	17526.9	Shared	High	High	High	0.0001305	2.603e-05	4.04	150.66	K.VQQLLQDFFNGK.E	[352-363]	Not Used	Not Used
[R].FEELNMDLFR.[K]		FALSE	0.000663472	0.000572698	2	2	3	Q9LHA8; P22953	Q9LHA8 [308-317]; P22953 [308-317]		0	1313.62	0	7.416	0.209213	0	43285.9	5837.06	Shared	High	Peak Found	High	0.0001305	0.0001294	3.48	152.01	R.FEELNMDLFR.K	[308-317]	Not Used	Not Used
[R].VEIIANDQGNR.[T]		FALSE	5.50346e-05	0.000572698	2	5	12	Q9LHA8; P22953	Q9LHA8 [29-39]; P22953 [29-39]		0	1228.63	0	6.922	0.321711	0	246630	35627.4	Shared	High	High	High	0.0001305	1.027e-05	3.11	61.34	R.VEIIANDQGNR.T	[29-39]	Not Used	Not Used
[R].TTPSYVAFTDSER.[L]		FALSE	0.000434608	0.000572698	2	5	4	Q9LHA8; P22953	Q9LHA8 [40-52]; P22953 [40-52]		0	1473.69	0	2.427	0.919939	0	329140	135618	Shared	High	High	High	0.0001305	8.388e-05	3.01	98.46	R.TTPSYVAFTDSER.L	[40-52]	Not Used	Not Used
[R].MVNHFVQEFK.[R]		FALSE	0.00109487	0.000987479	2	5	6	Q9LHA8; P22953	Q9LHA8 [243-252]; P22953 [243-252]		0	1278.63	0	3.519	0.869663	0	49113.4	13956.1	Shared	High	High	High	0.0001991	0.0002151	2.59	93.52	R.MVNHFVQEFK.R	[243-252]	Not Used	Not Used
[R].FSDSSVQSDMK.[L]		FALSE	0.00277702	0.00143413	1	1	1	P22953	P22953 [81-91]		0	1230.53	0	1.605	0.837035	0	30552.9	19036.6		High	Peak Found	High	0.0002813	0.0005633	3.03	67.06	R.FSDSSVQSDMK.L	[81-91]	Used	Used
[K].DAGVIAGLNVMR.[I]		FALSE	0.00438561	0.00166669	1	2	1	P22953	P22953 [164-175]		0	1215.65	0	1.774	0.887445	0	22173.7	12501.5		High	Peak Found	High	0.0003407	0.0009102	1.39	125.06	K.DAGVIAGLNVMR.I	[164-175]	Used	Used
[K].NAVVTVPAYFNDSQR.[Q]	1xDeamidated [N/Q]	FALSE	0.00647293	0.00166669	3	6	5	Q9LHA8; Q9S9N1; P22953	Q9LHA8 [145-159]; Q9S9N1 [144-158]; P22953 [145-159]		0	1681.82	0	4.974	0.610595	0	88585.8	17809.5	Shared	High	High	High	0.0003948	0.001362	2.85	120.07	K.NAVVTVPAYFNDSQR.Q	[145-159]	Not Used	Not Used
[R].MVNHFVQEFK.[R]	1xOxidation [M1]	FALSE	0.127138	0.00846828	2	5	5	Q9LHA8; P22953	Q9LHA8 [243-252]; P22953 [243-252]		0	1294.62	0	100	5.76991e-17		33959.9		Shared	High	Not Found	High	0.002243	0.02833	2.72	84.41	R.MVNHFVQEFK.R	[243-252]	Not Used	Not Used
Q9SCV9	Beta-galactosidase 3 OS=Arabidopsis thaliana OX=3702 GN=BGAL3 PE=2 SV=1	0	FALSE	24.016	10	6	23	6	856	95.1	7.21	64.57	6	0	1.771	0.868857	34.19	143599	62792.8	High	High	1		0.824564	-0.248219
Annotated Sequence	Modifications	Contaminant	Qvality PEP	Qvality q-value	# Protein Groups	# Proteins	# PSMs	Master Protein Accessions	Positions in Master Proteins	Modifications in Master Proteins	# Missed Cleavages	Theo. MH+ [Da]	# Razor Quan Results	Abundance Ratio: (F4) / (F3)	Abundance Ratio Adj. P-Value: (F4) / (F3)	Abundance Ratio Variability [%]: (F4) / (F3)	Abundances (Grouped): F4	Abundances (Grouped): F3	Quan Info	Found in Sample: [S4] F4: Sample	Found in Sample: [S3] F3: Sample	Confidence (by Search Engine): Sequest HT	Percolator q-Value (by Search Engine): Sequest HT	Percolator PEP (by Search Engine): Sequest HT	XCorr (by Search Engine): Sequest HT	Top Apex RT [min]	Sequence in Protein	Positions in Proteins	Quan Usage	Quan Ratio Usage
[K].FITHTVPFSEINK.[A]		FALSE	8.05794e-05	0.000572698	1	1	8	P06525	P06525 [348-360]		0	1532.81	0	2.27	0.928257	0	161784	71282.9		High	High	High	0.0001305	1.518e-05	2.93	104.49	K.FITHTVPFSEINK.A	[348-360]	Used	Used
[K].EFGVTECVNPK.[D]	1xCarbamidomethyl [C7]	FALSE	0.00237945	0.000987479	1	1	2	P06525	P06525 [237-247]		0	1279.6	0	3.95	0.826075	0	27581	6983.3		High	Peak Found	High	0.0001991	0.0004788	3.2	83.04	K.EFGVTECVNPK.D	[237-247]	Used	Used
[K].KGQSVAIFGLGAVGLGAAEGAR.[I]		FALSE	0.00527288	0.00166669	1	1	1	P06525	P06525 [194-215]		1	2029.12	0						No Quan Values	Not Found	High	High	0.0003948	0.0011	3.8		K.KGQSVAIFGLGAVGLGAAEGAR.I	[194-215]	Not Used	Not Used
[K].AFDYMLK.[G]		FALSE	0.00358123	0.00166669	1	1	7	P06525	P06525 [361-367]		0	887.433	1	6.585	0.37503	0	78169	11871.3		High	High	High	0.0003407	0.0007357	2.04	107.75	K.AFDYMLK.G	[361-367]	Used	Used
[R].GGMIHDGESR.[F]		FALSE	0.0385761	0.00486181	1	1	3	P06525	P06525 [123-132]		0	1058.47	0	1.273	0.670636	0	12810.7	10067.1		High	Peak Found	High	0.001076	0.008799	2.18	34.87	R.GGMIHDGESR.F	[123-132]	Used	Used
[K].TDIPGVVEK.[Y]		FALSE	0.0419967	0.00486181	1	1	2	P06525	P06525 [329-337]		0	957.525	0	2.808	0.867835	0	406990	144930		High	High	High	0.001076	0.009574	1.84	73.22	K.TDIPGVVEK.Y	[329-337]	Used	Used
[K].GQTPLFPR.[I]		FALSE	0.127138	0.00846828	1	1	3	P06525	P06525 [58-65]		0	915.505	0	3.876	0.713143	0	160689	41452.2		High	Peak Found	High	0.002243	0.02842	2.05	85.27	K.GQTPLFPR.I	[58-65]	Used	Used
Q9SCX3	Elongation factor 1-beta 2 OS=Arabidopsis thaliana OX=3702 GN=At5g19510 PE=1 SV=1	0	FALSE	28.199	37	6	25	5	224	24.2	4.56	69.85	6	1	3.342	0.874367	18.55	604989	178672	High	High	1		1.74071	-0.524006
Annotated Sequence	Modifications	Contaminant	Qvality PEP	Qvality q-value	# Protein Groups	# Proteins	# PSMs	Master Protein Accessions	Positions in Master Proteins	Modifications in Master Proteins	# Missed Cleavages	Theo. MH+ [Da]	# Razor Quan Results	Abundance Ratio: (F4) / (F3)	Abundance Ratio Adj. P-Value: (F4) / (F3)	Abundance Ratio Variability [%]: (F4) / (F3)	Abundances (Grouped): F4	Abundances (Grouped): F3	Quan Info	Found in Sample: [S4] F4: Sample	Found in Sample: [S3] F3: Sample	Confidence (by Search Engine): Sequest HT	Percolator q-Value (by Search Engine): Sequest HT	Percolator PEP (by Search Engine): Sequest HT	XCorr (by Search Engine): Sequest HT	Top Apex RT [min]	Sequence in Protein	Positions in Proteins	Quan Usage	Quan Ratio Usage
[K].IYPNIEVIPIQK.[I]		FALSE	0.000663472	0.000572698	1	1	7	Q9CAI3	Q9CAI3 [318-329]		0	1426.83	0	1.348	0.696954	0	29054.2	21556.5		High	High	High	0.0001305	0.0001291	2.31	132.06	K.IYPNIEVIPIQK.I	[318-329]	Used	Used
[K].SLDFLVDTASGDHAFDPYMSLLK.[I]		FALSE	0.00731399	0.00166669	1	1	3	Q9CAI3	Q9CAI3 [245-267]		0	2542.22	0	0.01	5.76991e-17			12931.1		Not Found	High	High	0.0003948	0.00154	1.77	180.94	K.SLDFLVDTASGDHAFDPYMSLLK.I	[245-267]	Used	Used
[K].IAGTYVLVGFPSEIK.[I]		FALSE	0.0150187	0.00190722	1	1	1	Q9CAI3	Q9CAI3 [268-282]		0	1593.89	0	2.36	0.983505	0	15394.3	6523.56		Peak Found	High	High	0.0004264	0.003269	1.71	150.06	K.IAGTYVLVGFPSEIK.I	[268-282]	Used	Used
[R].HNMNQPGK.[S]		FALSE	0.0296173	0.00462251	1	1	1	Q9CAI3	Q9CAI3 [176-183]		0	925.431	0	100	5.76991e-17		6420.43			High	Not Found	High	0.0009067	0.006683	2.42	22.18	R.HNMNQPGK.S	[176-183]	Used	Used
[K].ISPANLNLGMR.[M]		FALSE	0.0291128	0.00462251	1	1	5	Q9CAI3	Q9CAI3 [283-293]		0	1185.64	0	1.891	0.925547	0	34113.9	18039.8		High	High	High	0.0009067	0.006551	1.7	111.42	K.ISPANLNLGMR.M	[283-293]	Used	Used
Q9SU63	Aldehyde dehydrogenase family 2 member B4, mitochondrial OS=Arabidopsis thaliana OX=3702 GN=ALDH2B4 PE=1 SV=1	0	FALSE	22.659	14	6	13	6	538	58.6	7.46	41.9	6	0	3.204	0.893131	33.46	252834	64833.1	High	High	1		1.67987	-0.505693
Annotated Sequence	Modifications	Contaminant	Qvality PEP	Qvality q-value	# Protein Groups	# Proteins	# PSMs	Master Protein Accessions	Positions in Master Proteins	Modifications in Master Proteins	# Missed Cleavages	Theo. MH+ [Da]	# Razor Quan Results	Abundance Ratio: (F4) / (F3)	Abundance Ratio Adj. P-Value: (F4) / (F3)	Abundance Ratio Variability [%]: (F4) / (F3)	Abundances (Grouped): F4	Abundances (Grouped): F3	Quan Info	Found in Sample: [S4] F4: Sample	Found in Sample: [S3] F3: Sample	Confidence (by Search Engine): Sequest HT	Percolator q-Value (by Search Engine): Sequest HT	Percolator PEP (by Search Engine): Sequest HT	XCorr (by Search Engine): Sequest HT	Top Apex RT [min]	Sequence in Protein	Positions in Proteins	Quan Usage	Quan Ratio Usage
[K].YMALTELQER.[N]		FALSE	0.000975668	0.000572698	1	1	1	O82191	O82191 [99-108]		0	1253.62	0	3.086	0.925353	0	71874.5	23294		High	Peak Found	High	0.0001305	0.0001909	2.64	108.4	K.YMALTELQER.N	[99-108]	Used	Used
[K].LLNDEFYIGLR.[Q]		FALSE	0.00559961	0.00166669	1	2	2	O82191	O82191 [229-239]		0	1352.72	0	3.144	0.825862	0	1.68194e+06	535002		Peak Found	High	High	0.0003948	0.001174	2.55	143.52	K.LLNDEFYIGLR.Q	[229-239]	Used	Used
[R].GLLPPVVLDQK.[L]		FALSE	0.00829172	0.00190722	1	1	3	O82191	O82191 [69-79]		0	1178.71	0	2.01	0.966045	0	73867.3	36750.8		Peak Found	High	High	0.0004264	0.001759	2.4	130.12	R.GLLPPVVLDQK.L	[69-79]	Used	Used
[K].IWLVDSK.[G]		FALSE	0.00961636	0.00190722	1	3	5	O82191	O82191 [359-365]		0	860.488	0	3.723	0.845268	0	47805.4	12839.9		High	High	High	0.0004264	0.002046	1.68	107.05	K.IWLVDSK.G	[359-365]	Used	Used
[K].AIKPTVLIGSSGVGR.[S]		FALSE	0.00961636	0.00190722	1	1	1	O82191	O82191 [399-413]		0	1454.87	0	2.468	0.96464	0	93415.1	37849.9		Peak Found	High	High	0.0004264	0.002053	3.37	95.04	K.AIKPTVLIGSSGVGR.S	[399-413]	Used	Used
[K].AYELGLAGR.[L]		FALSE	0.0264354	0.00400174	1	1	3	O82191	O82191 [549-557]		0	949.51	0	3.838	0.784258	0	103646	27005.6		High	High	High	0.0007949	0.005928	2.84	89.67	K.AYELGLAGR.L	[549-557]	Used	Used
[K].QMNASVEESR.[K]		FALSE	0.0713735	0.00573653	1	1	1	O82191	O82191 [347-356]		0	1150.52	0						No Quan Values	High	Not Found	High	0.001588	0.01622	2.99		K.QMNASVEESR.K	[347-356]	Not Used	Not Used
O22263	Protein disulfide-isomerase like 2-1 OS=Arabidopsis thaliana OX=3702 GN=PDIL2-1 PE=2 SV=1	0	FALSE	23.162	19	6	21	6	361	39.5	6.06	57.01	6	0	3.117	0.904944	38.08	316485	92346.2	High	High	1		1.64016	-0.493737
Annotated Sequence	Modifications	Contaminant	Qvality PEP	Qvality q-value	# Protein Groups	# Proteins	# PSMs	Master Protein Accessions	Positions in Master Proteins	Modifications in Master Proteins	# Missed Cleavages	Theo. MH+ [Da]	# Razor Quan Results	Abundance Ratio: (F4) / (F3)	Abundance Ratio Adj. P-Value: (F4) / (F3)	Abundance Ratio Variability [%]: (F4) / (F3)	Abundances (Grouped): F4	Abundances (Grouped): F3	Quan Info	Found in Sample: [S4] F4: Sample	Found in Sample: [S3] F3: Sample	Confidence (by Search Engine): Sequest HT	Percolator q-Value (by Search Engine): Sequest HT	Percolator PEP (by Search Engine): Sequest HT	XCorr (by Search Engine): Sequest HT	Top Apex RT [min]	Sequence in Protein	Positions in Proteins	Quan Usage	Quan Ratio Usage
[R].LAVQLVAGGSGVK.[N]		FALSE	0.000313008	0.000572698	1	1	1	O49485	O49485 [398-410]		0	1198.72	0	100	5.76991e-17		22446.9			High	Not Found	High	0.0001305	6.025e-05	2.66	97.48	R.LAVQLVAGGSGVK.N	[398-410]	Used	Used
[K].ILNDETFAK.[M]		FALSE	0.0144014	0.00190722	1	1	3	O49485	O49485 [271-279]		0	1050.55	0	3.064	0.928471	0	35507.7	11589.6		High	Peak Found	High	0.0004264	0.003115	2.22	77.83	K.ILNDETFAK.M	[271-279]	Used	Used
Q8VZG7	Ribonuclease TUDOR 1 OS=Arabidopsis thaliana OX=3702 GN=TSN1 PE=1 SV=1	0	FALSE	24.398	9	6	12	3	991	108.2	7.3	37.14	6	3	3.075	0.909764	43.75	284688	121018	High	High	1		1.62059	-0.487845
Annotated Sequence	Modifications	Contaminant	Qvality PEP	Qvality q-value	# Protein Groups	# Proteins	# PSMs	Master Protein Accessions	Positions in Master Proteins	Modifications in Master Proteins	# Missed Cleavages	Theo. MH+ [Da]	# Razor Quan Results	Abundance Ratio: (F4) / (F3)	Abundance Ratio Adj. P-Value: (F4) / (F3)	Abundance Ratio Variability [%]: (F4) / (F3)	Abundances (Grouped): F4	Abundances (Grouped): F3	Quan Info	Found in Sample: [S4] F4: Sample	Found in Sample: [S3] F3: Sample	Confidence (by Search Engine): Sequest HT	Percolator q-Value (by Search Engine): Sequest HT	Percolator PEP (by Search Engine): Sequest HT	XCorr (by Search Engine): Sequest HT	Top Apex RT [min]	Sequence in Protein	Positions in Proteins	Quan Usage	Quan Ratio Usage
[K].SVFPTSESFTTGQTK.[L]		FALSE	0.00049015	0.000572698	1	1	2	Q9FJ62	Q9FJ62 [594-608]		0	1616.78	0	2.094	0.93951	0	20317.3	9701.51		High	Peak Found	High	0.0001305	9.482e-05	3.55	106.15	K.SVFPTSESFTTGQTK.L	[594-608]	Used	Used
[K].TFASGVLVPK.[S]		FALSE	0.000215419	0.000572698	1	1	4	Q9FJ62	Q9FJ62 [263-272]		0	1018.59	0	1.176	0.557168	0	26227.5	22294.7		High	High	High	0.0001305	4.111e-05	2.69	101.19	K.TFASGVLVPK.S	[263-272]	Used	Used
[K].SPWQTLTGDAPLVIAR.[G]		FALSE	4.41995e-05	0.000572698	1	1	1	Q9FJ62	Q9FJ62 [40-55]		0	1724.93	0	2.573	0.993138	0	27655	10748.4		High	Peak Found	High	0.0001305	8.227e-06	3.97	153.09	K.SPWQTLTGDAPLVIAR.G	[40-55]	Used	Used
[K].FQLPVYVEVFR.[N]		FALSE	0.000505077	0.000572698	1	1	2	Q9FJ62	Q9FJ62 [616-626]		0	1396.76	0	4.811	0.719521	0	21426.4	4453.81		High	High	High	0.0001305	9.787e-05	1.73	170.38	K.FQLPVYVEVFR.N	[616-626]	Used	Used
[K].FADAVVISK.[K]		FALSE	0.000552542	0.000572698	1	1	2	Q9FJ62	Q9FJ62 [584-592]		0	949.535	0	1.961	0.925547	0	24916.5	12703.4		High	High	High	0.0001305	0.0001073	3.14	83.18	K.FADAVVISK.K	[584-592]	Used	Used
[R].SAAFDGNSYGISTVK.[D]		FALSE	0.00237945	0.000987479	1	1	1	Q9FJ62	Q9FJ62 [153-167]		0	1516.73	0	1.327	0.694357	0	22454.3	16922.9		High	Peak Found	High	0.0001991	0.0004787	3.44	97.16	R.SAAFDGNSYGISTVK.D	[153-167]	Used	Used
[K].TVIIDYLSSPEVNFFR.[N]		FALSE	0.00317777	0.00143413	1	1	1	Q9FJ62	Q9FJ62 [205-220]		0	1899.99	0						No Quan Values	Not Found	High	High	0.0002813	0.0006481	3.52		K.TVIIDYLSSPEVNFFR.N	[205-220]	Not Used	Not Used
Q9ZU52	Fructose-bisphosphate aldolase 3, chloroplastic OS=Arabidopsis thaliana OX=3702 GN=FBA3 PE=1 SV=1	0	FALSE	27.751	19	6	28	4	391	42.3	8.09	57.32	6	2	2.973	0.92429	24.05	503963	166142	High	High	1		1.57192	-0.473195
Annotated Sequence	Modifications	Contaminant	Qvality PEP	Qvality q-value	# Protein Groups	# Proteins	# PSMs	Master Protein Accessions	Positions in Master Proteins	Modifications in Master Proteins	# Missed Cleavages	Theo. MH+ [Da]	# Razor Quan Results	Abundance Ratio: (F4) / (F3)	Abundance Ratio Adj. P-Value: (F4) / (F3)	Abundance Ratio Variability [%]: (F4) / (F3)	Abundances (Grouped): F4	Abundances (Grouped): F3	Quan Info	Found in Sample: [S4] F4: Sample	Found in Sample: [S3] F3: Sample	Confidence (by Search Engine): Sequest HT	Percolator q-Value (by Search Engine): Sequest HT	Percolator PEP (by Search Engine): Sequest HT	XCorr (by Search Engine): Sequest HT	Top Apex RT [min]	Sequence in Protein	Positions in Proteins	Quan Usage	Quan Ratio Usage
[R].EIAQTIANSANK.[V]		FALSE	0.000857688	0.000572698	1	1	1	O49460	O49460 [254-265]		0	1259.66	0	2.078	0.945037	0	29196	14050.8		Peak Found	High	High	0.0001991	0.0002674	2.7	67.4	R.EIAQTIANSANK.V	[254-265]	Used	Used
Q9SGC1	Probable phosphoglucomutase, cytoplasmic 2 OS=Arabidopsis thaliana OX=3702 GN=At1g70730 PE=1 SV=1	0	FALSE	19.326	14	6	13	6	585	63.4	5.82	32.03	6	0	2.925	0.930437	26.73	211063	53516.8	High	High	1		1.54844	-0.466126
Annotated Sequence	Modifications	Contaminant	Qvality PEP	Qvality q-value	# Protein Groups	# Proteins	# PSMs	Master Protein Accessions	Positions in Master Proteins	Modifications in Master Proteins	# Missed Cleavages	Theo. MH+ [Da]	# Razor Quan Results	Abundance Ratio: (F4) / (F3)	Abundance Ratio Adj. P-Value: (F4) / (F3)	Abundance Ratio Variability [%]: (F4) / (F3)	Abundances (Grouped): F4	Abundances (Grouped): F3	Quan Info	Found in Sample: [S4] F4: Sample	Found in Sample: [S3] F3: Sample	Confidence (by Search Engine): Sequest HT	Percolator q-Value (by Search Engine): Sequest HT	Percolator PEP (by Search Engine): Sequest HT	XCorr (by Search Engine): Sequest HT	Top Apex RT [min]	Sequence in Protein	Positions in Proteins	Quan Usage	Quan Ratio Usage
[K].GPGANSFESANTFTSGQVTAK.[G]		FALSE	0.000216359	0.000572698	1	1	2	Q39168	Q39168 [73-93]		0	2070.97	0						No Quan Values	High	Not Found	High	0.0001305	4.143e-05	5.84		K.GPGANSFESANTFTSGQVTAK.G	[73-93]	Not Used	Not Used
[R].VSSTSASAAEGDAAAAVTR.[K]		FALSE	7.46136e-07	0.000572698	1	1	6	Q39168	Q39168 [99-117]		0	1721.83	0	2.803	0.913389	0	130651	46612.1		High	High	High	0.0001305	1.31e-07	5.28	83.36	R.VSSTSASAAEGDAAAAVTR.K	[99-117]	Used	Used
P42730	Chaperone protein ClpB1 OS=Arabidopsis thaliana OX=3702 GN=CLPB1 PE=1 SV=2	0	FALSE	27.27	8	6	16	6	911	101.2	6.13	53.81	6	0	2.174	0.952508	21.52	514433	249890	High	High	1		1.12035	-0.33726
Annotated Sequence	Modifications	Contaminant	Qvality PEP	Qvality q-value	# Protein Groups	# Proteins	# PSMs	Master Protein Accessions	Positions in Master Proteins	Modifications in Master Proteins	# Missed Cleavages	Theo. MH+ [Da]	# Razor Quan Results	Abundance Ratio: (F4) / (F3)	Abundance Ratio Adj. P-Value: (F4) / (F3)	Abundance Ratio Variability [%]: (F4) / (F3)	Abundances (Grouped): F4	Abundances (Grouped): F3	Quan Info	Found in Sample: [S4] F4: Sample	Found in Sample: [S3] F3: Sample	Confidence (by Search Engine): Sequest HT	Percolator q-Value (by Search Engine): Sequest HT	Percolator PEP (by Search Engine): Sequest HT	XCorr (by Search Engine): Sequest HT	Top Apex RT [min]	Sequence in Protein	Positions in Proteins	Quan Usage	Quan Ratio Usage
[R].LADMAEYVGQR.[T]	1xOxidation [M4]	FALSE	9.94285e-05	0.000572698	1	1	22	Q9SS98	Q9SS98 [132-142]		0	1268.59	0	1.72	0.993138	0	753060	437747		High	High	High	0.0001305	1.88e-05	4.05	65.04	R.LADMAEYVGQR.T	[132-142]	Used	Used
[R].LADMAEYVGQR.[T]		FALSE	0.000186562	0.000572698	1	1	8	Q9SS98	Q9SS98 [132-142]		0	1252.6	0	1.568	0.997269	0	7.85645e+06	5009625		High	High	High	0.0001305	3.55e-05	4.11	96.82	R.LADMAEYVGQR.T	[132-142]	Used	Used
[R].THSHQLQVHPQR.[Q]		FALSE	3.72503e-05	0.000572698	1	1	39	Q9SS98	Q9SS98 [6-17]		0	1467.76	0	2.713	0.8797	0	1.00418e+06	370168		High	High	High	0.0001305	6.923e-06	3.69	45.66	R.THSHQLQVHPQR.Q	[6-17]	Used	Used
[R].TKDAGQTIEDKAHDVR.[E]		FALSE	9.77026e-05	0.000572698	1	1	7	Q9SS98	Q9SS98 [143-158]		2	1783.89	0	0.036	7.07256e-05	0	19801.4	543291		Peak Found	High	High	0.0001305	1.847e-05	3.04	61.7	R.TKDAGQTIEDKAHDVR.E	[143-158]	Used	Used
[R].RAGQHIPEELEEAK.[H]		FALSE	0.000345777	0.000572698	1	1	6	Q9SS98	Q9SS98 [116-129]		1	1606.82	0	100	5.76991e-17		488342			High	Not Found	High	0.0001305	6.66e-05	4.11	75.25	R.RAGQHIPEELEEAK.H	[116-129]	Used	Used
[K].DAGQTIEDKAHDVR.[E]		FALSE	0.000533973	0.000572698	1	1	4	Q9SS98	Q9SS98 [145-158]		1	1554.75	0	0.057	0.000622061	0	119240	2.10383e+06		Peak Found	High	High	0.0001305	0.0001036	2.67	64.13	K.DAGQTIEDKAHDVR.E	[145-158]	Used	Used
[R].AGQHIPEELEEAK.[H]		FALSE	1.92046e-05	0.000572698	1	1	53	Q9SS98	Q9SS98 [117-129]		0	1450.72	0	5.748	0.441097	0	4.2168e+06	733654		High	High	High	0.0001305	3.529e-06	4.23	71.48	R.AGQHIPEELEEAK.H	[117-129]	Used	Used
[R].AGQHIPEELEEAKHR.[L]		FALSE	4.30516e-05	0.000572698	1	1	2	Q9SS98	Q9SS98 [117-131]		1	1743.88	0	0.01	5.76991e-17			78870.1		Not Found	High	High	0.0001305	8.02e-06	3.52	65.28	R.AGQHIPEELEEAKHR.L	[117-131]	Used	Used
[R].TKDAGQTIEDK.[A]		FALSE	0.00212955	0.000987479	1	1	45	Q9SS98	Q9SS98 [143-153]		1	1205.6	0	2.701	0.882318	0	178115	65948.8		High	High	High	0.0001991	0.0004269	4.03	31.85	R.TKDAGQTIEDK.A	[143-153]	Used	Used
[K].DAGQTIEDK.[A]		FALSE	0.00278805	0.00143413	1	1	11	Q9SS98	Q9SS98 [145-153]		0	976.458	0	3.933	0.696954	0	263420	66969.4		High	High	High	0.0002813	0.0005652	3.03	36.77	K.DAGQTIEDK.A	[145-153]	Used	Used
Q9SIP7	40S ribosomal protein S3-1 OS=Arabidopsis thaliana OX=3702 GN=RPS3A PE=1 SV=1	0	FALSE	27.824	27	6	16	6	250	27.5	9.54	47.5	6	0	2.783	0.953111	33.32	601242	160033	High	High	1		1.47664	-0.444513
Annotated Sequence	Modifications	Contaminant	Qvality PEP	Qvality q-value	# Protein Groups	# Proteins	# PSMs	Master Protein Accessions	Positions in Master Proteins	Modifications in Master Proteins	# Missed Cleavages	Theo. MH+ [Da]	# Razor Quan Results	Abundance Ratio: (F4) / (F3)	Abundance Ratio Adj. P-Value: (F4) / (F3)	Abundance Ratio Variability [%]: (F4) / (F3)	Abundances (Grouped): F4	Abundances (Grouped): F3	Quan Info	Found in Sample: [S4] F4: Sample	Found in Sample: [S3] F3: Sample	Confidence (by Search Engine): Sequest HT	Percolator q-Value (by Search Engine): Sequest HT	Percolator PEP (by Search Engine): Sequest HT	XCorr (by Search Engine): Sequest HT	Top Apex RT [min]	Sequence in Protein	Positions in Proteins	Quan Usage	Quan Ratio Usage
[K].DDNPIGATLIGR.[A]		FALSE	0.000725086	0.000572698	1	1	1	Q38882	Q38882 [97-108]		0	1241.65	0	2.97	0.96464	0	17395.3	5856.85		High	Peak Found	High	0.0001305	0.0001416	1.82	115.7	K.DDNPIGATLIGR.A	[97-108]	Used	Used
Q9FLN9	Peroxygenase 2 OS=Arabidopsis thaliana OX=3702 GN=PXG2 PE=1 SV=1	0	FALSE	31.92	32	6	23	6	243	27.9	5.97	68.44	6	0	2.782	0.953111	50.6	698428	310033	High	High	1		1.47612	-0.444357
Annotated Sequence	Modifications	Contaminant	Qvality PEP	Qvality q-value	# Protein Groups	# Proteins	# PSMs	Master Protein Accessions	Positions in Master Proteins	Modifications in Master Proteins	# Missed Cleavages	Theo. MH+ [Da]	# Razor Quan Results	Abundance Ratio: (F4) / (F3)	Abundance Ratio Adj. P-Value: (F4) / (F3)	Abundance Ratio Variability [%]: (F4) / (F3)	Abundances (Grouped): F4	Abundances (Grouped): F3	Quan Info	Found in Sample: [S4] F4: Sample	Found in Sample: [S3] F3: Sample	Confidence (by Search Engine): Sequest HT	Percolator q-Value (by Search Engine): Sequest HT	Percolator PEP (by Search Engine): Sequest HT	XCorr (by Search Engine): Sequest HT	Top Apex RT [min]	Sequence in Protein	Positions in Proteins	Quan Usage	Quan Ratio Usage
[R].LSLTDIVIDINR.[V]		FALSE	3.3528e-05	0.000572698	1	2	3	Q9T043	Q9T043 [53-64]		0	1371.78	0						No Quan Values	High	Not Found	High	0.0001305	6.214e-06	3.35		R.LSLTDIVIDINR.V	[53-64]	Not Used	Not Used
[R].VALVNYGEDHGK.[L]		FALSE	0.00123212	0.000987479	1	1	2	Q9T043	Q9T043 [12-23]		0	1301.65	0	2.119	0.960181	0	131674	62149.1		High	High	High	0.0001991	0.0002428	1.71	67.87	R.VALVNYGEDHGK.L	[12-23]	Used	Used
[R].ALVDAPDMER.[I]		FALSE	0.0218836	0.00332708	1	2	3	Q9T043	Q9T043 [36-45]		0	1116.54	0	3.467	0.765034	0	182604	52667.2		High	High	High	0.0006776	0.004843	3.05	84.93	R.ALVDAPDMER.I	[36-45]	Used	Used
Q9SYG7	Aldehyde dehydrogenase family 7 member B4 OS=Arabidopsis thaliana OX=3702 GN=ALDH7B4 PE=2 SV=3	0	FALSE	17.973	11	6	13	6	508	54.2	5.54	31.76	6	0	2.712	0.960871	49.01	316709	132723	High	High	1		1.43936	-0.43329
Annotated Sequence	Modifications	Contaminant	Qvality PEP	Qvality q-value	# Protein Groups	# Proteins	# PSMs	Master Protein Accessions	Positions in Master Proteins	Modifications in Master Proteins	# Missed Cleavages	Theo. MH+ [Da]	# Razor Quan Results	Abundance Ratio: (F4) / (F3)	Abundance Ratio Adj. P-Value: (F4) / (F3)	Abundance Ratio Variability [%]: (F4) / (F3)	Abundances (Grouped): F4	Abundances (Grouped): F3	Quan Info	Found in Sample: [S4] F4: Sample	Found in Sample: [S3] F3: Sample	Confidence (by Search Engine): Sequest HT	Percolator q-Value (by Search Engine): Sequest HT	Percolator PEP (by Search Engine): Sequest HT	XCorr (by Search Engine): Sequest HT	Top Apex RT [min]	Sequence in Protein	Positions in Proteins	Quan Usage	Quan Ratio Usage
[K].GGAAAVMQSAATANKR.[G]		FALSE	0.000354865	0.000572698	1	1	4	Q9LJ97	Q9LJ97 [53-68]		1	1503.77	0	1.335	0.964424	0	131201	98243.2		High	High	High	0.0001305	6.849e-05	4.35	64.14	K.GGAAAVMQSAATANKR.G	[53-68]	Used	Used
[K].GGAAAVMQSAATANK.[R]		FALSE	1.45021e-05	0.000572698	1	1	3	Q9LJ97	Q9LJ97 [53-67]		0	1347.67	0	2.988	0.885379	0	127995	42829.7		High	Peak Found	High	0.0001305	2.655e-06	5.44	68.27	K.GGAAAVMQSAATANK.R	[53-67]	Used	Used
[R].GGFVHPGDTTDLAAER.[G]		FALSE	4.76206e-05	0.000572698	1	1	8	Q9LJ97	Q9LJ97 [69-84]		0	1642.78	0	2.194	0.934141	0	337647	153889		High	High	High	0.0001305	8.887e-06	4.03	84.76	R.GGFVHPGDTTDLAAER.G	[69-84]	Used	Used
[R].GVTVAQTDVPGAR.[V]		FALSE	6.00778e-05	0.000572698	1	1	3	Q9LJ97	Q9LJ97 [85-97]		0	1270.67	0	2.231	0.929909	0	671025	300765		High	High	High	0.0001305	1.124e-05	3.06	69.72	R.GVTVAQTDVPGAR.V	[85-97]	Used	Used
[R].QDAEGVVSAELR.[N]		FALSE	0.000564462	0.000572698	1	1	5	Q9LJ97	Q9LJ97 [223-234]		0	1273.64	0	2.676	0.939328	0	95689.7	35757.7		High	High	High	0.0001305	0.0001096	3.85	96.29	R.QDAEGVVSAELR.N	[223-234]	Used	Used
[R].NNPNLSTHPGGVAASITAAAR.[L]		FALSE	4.24889e-05	0.000572698	1	1	3	Q9LJ97	Q9LJ97 [235-255]		0	2019.04	0	1.019	0.805786	0	83657.4	82061.8		High	High	High	0.0001305	7.91e-06	2.19	94.27	R.NNPNLSTHPGGVAASITAAAR.L	[235-255]	Used	Used
[K].LIDVLAGATGK.[L]		FALSE	0.000217303	0.000572698	1	1	6	Q9LJ97	Q9LJ97 [203-213]		0	1057.63	0	2.399	0.925353	0	142466	59386.1		High	High	High	0.0001305	4.145e-05	2.53	112.65	K.LIDVLAGATGK.L	[203-213]	Used	Used
[K].RGGFVHPGDTTDLAAER.[G]		FALSE	0.00656032	0.00166669	1	1	2	Q9LJ97	Q9LJ97 [68-84]		1	1798.88	0	7.393	0.226043	0	33041.4	4469.06		High	Peak Found	High	0.0003948	0.001377	3.03	78.94	K.RGGFVHPGDTTDLAAER.G	[68-84]	Used	Used
Q944G9	Fructose-bisphosphate aldolase 2, chloroplastic OS=Arabidopsis thaliana OX=3702 GN=FBA2 PE=1 SV=2	0	FALSE	20.426	23	6	17	4	398	43	7.24	44.78	6	0	2.31	0.984396	10.64	94400.1	41315.1	High	High	1		1.20789	-0.363612
Annotated Sequence	Modifications	Contaminant	Qvality PEP	Qvality q-value	# Protein Groups	# Proteins	# PSMs	Master Protein Accessions	Positions in Master Proteins	Modifications in Master Proteins	# Missed Cleavages	Theo. MH+ [Da]	# Razor Quan Results	Abundance Ratio: (F4) / (F3)	Abundance Ratio Adj. P-Value: (F4) / (F3)	Abundance Ratio Variability [%]: (F4) / (F3)	Abundances (Grouped): F4	Abundances (Grouped): F3	Quan Info	Found in Sample: [S4] F4: Sample	Found in Sample: [S3] F3: Sample	Confidence (by Search Engine): Sequest HT	Percolator q-Value (by Search Engine): Sequest HT	Percolator PEP (by Search Engine): Sequest HT	XCorr (by Search Engine): Sequest HT	Top Apex RT [min]	Sequence in Protein	Positions in Proteins	Quan Usage	Quan Ratio Usage
[R].SGFSNLTAVEAEK.[A]		FALSE	0.00047975	0.000572698	1	1	2	Q7G193	Q7G193 [157-169]		0	1352.67	0	1.057	0.477359	0	13975.1	13226.5		High	High	High	0.0001305	9.301e-05	3.24	98.89	R.SGFSNLTAVEAEK.A	[157-169]	Used	Used
[R].VPEGVLGIITYK.[D]		FALSE	0.00179548	0.000987479	1	1	2	Q7G193	Q7G193 [651-662]		0	1288.75	0	2.6	0.993637	0	24787.4	9534.38		High	Peak Found	High	0.0001991	0.0003574	1.36	142.06	R.VPEGVLGIITYK.D	[651-662]	Used	Used
[K].KVEEFLTGK.[V]		FALSE	0.00990146	0.00190722	1	1	2	Q7G193	Q7G193 [495-503]		1	1050.58	0	2.339	0.999906	0	49173.5	21019.2		High	High	High	0.0004264	0.002111	3.07	71.46	K.KVEEFLTGK.V	[495-503]	Used	Used
[K].AGEFSEYTLPLLWDR.[I]		FALSE	0.0617598	0.00545717	1	1	1	Q7G193	Q7G193 [993-1007]		0	1796.89	0						No Quan Values	Not Found	High	High	0.00142	0.01409	2.52		K.AGEFSEYTLPLLWDR.I	[993-1007]	Not Used	Not Used
P59259	Histone H4 OS=Arabidopsis thaliana OX=3702 GN=At1g07660 PE=1 SV=2	0	FALSE	21.256	51	6	27	6	103	11.4	11.47	52.65	6	0	2.344	0.989727	34.62	808408	333673	High	High	1		1.22897	-0.369958
Annotated Sequence	Modifications	Contaminant	Qvality PEP	Qvality q-value	# Protein Groups	# Proteins	# PSMs	Master Protein Accessions	Positions in Master Proteins	Modifications in Master Proteins	# Missed Cleavages	Theo. MH+ [Da]	# Razor Quan Results	Abundance Ratio: (F4) / (F3)	Abundance Ratio Adj. P-Value: (F4) / (F3)	Abundance Ratio Variability [%]: (F4) / (F3)	Abundances (Grouped): F4	Abundances (Grouped): F3	Quan Info	Found in Sample: [S4] F4: Sample	Found in Sample: [S3] F3: Sample	Confidence (by Search Engine): Sequest HT	Percolator q-Value (by Search Engine): Sequest HT	Percolator PEP (by Search Engine): Sequest HT	XCorr (by Search Engine): Sequest HT	Top Apex RT [min]	Sequence in Protein	Positions in Proteins	Quan Usage	Quan Ratio Usage
[K].HTFGMATEEEDKEHYPGSTTTTTATTR.[T]	1xOxidation [M5]	FALSE	1.03055e-07	0.000572698	1	1	8	Q9LW12	Q9LW12 [187-213]		1	3015.33	0	9.161	0.17136	0	99816.2	10896		High	High	High	0.0001305	1.753e-08	5.63	70.91	K.HTFGMATEEEDKEHYPGSTTTTTATTR.T	[187-213]	Used	Used
[K].HTFGMATEEEDKEHYPGSTTTTTATTR.[T]		FALSE	7.23559e-07	0.000572698	1	1	36	Q9LW12	Q9LW12 [187-213]		1	2999.33	0	1.622	0.999906	0	380977	234897		High	High	High	0.0001305	1.265e-07	5.48	80.89	K.HTFGMATEEEDKEHYPGSTTTTTATTR.T	[187-213]	Used	Used
[K].TSQTAQAAQQK.[A]		FALSE	0.000383554	0.000572698	1	1	5	Q9LW12	Q9LW12 [61-71]		0	1161.59	0	100	5.76991e-17	0	261908	1674.85		High	Peak Found	High	0.0001305	7.384e-05	4.31	21.91	K.TSQTAQAAQQK.A	[61-71]	Used	Used
[K].TSQTAQTAQQK.[A]		FALSE	0.000463555	0.000572698	1	1	5	Q9LW12	Q9LW12 [39-49]; [83-93]		0	1191.6	0	15.483	0.0446365	0	410151	26490.7		High	Peak Found	High	0.0001305	8.964e-05	3.81	16.23	K.TSQTAQTAQQK.A; K.TSQTAQTAQQK.A	[39-49]; [83-93]	Used	Used
[K].TGGFLSQTGEHVK.[Q]		FALSE	0.000189019	0.000572698	1	1	12	Q9LW12	Q9LW12 [163-175]		0	1360.69	0	3.809	0.716539	0	1.09292e+07	2.86943e+06		High	High	High	0.0001305	3.6e-05	4.36	70.82	K.TGGFLSQTGEHVK.Q	[163-175]	Used	Used
[K].TGQAMGTMR.[D]		FALSE	0.000883109	0.000572698	1	1	15	Q9LW12	Q9LW12 [21-29]		0	952.434	0	1.686	0.996484	0	1.60847e+06	954112		High	High	High	0.0001305	0.0001729	3.28	43.23	K.TGQAMGTMR.D	[21-29]	Used	Used
[K].EKTSQTAQTAQQK.[A]		FALSE	0.000596622	0.000572698	1	1	6	Q9LW12	Q9LW12 [81-93]		1	1448.73	0	100	5.76991e-17		36802.4			High	Not Found	High	0.0001305	0.0001161	3.43	21.27	K.EKTSQTAQTAQQK.A	[81-93]	Used	Used
[R].DKTSQTAQTAQQK.[A]		FALSE	4.9105e-05	0.000572698	1	1	77	Q9LW12	Q9LW12 [37-49]		1	1434.72	0	7.345	0.287642	0	66644	9073.68		High	High	High	0.0001305	9.17e-06	3.15	22.63	R.DKTSQTAQTAQQK.A	[37-49]	Used	Used
[K].DKTSQTAQAAQQK.[A]		FALSE	5.01935e-05	0.000572698	1	1	65	Q9LW12	Q9LW12 [59-71]		1	1404.71	0	1.574	0.997269	0	401356	254921		High	High	High	0.0001305	9.355e-06	4.82	24.59	K.DKTSQTAQAAQQK.A	[59-71]	Used	Used
[K].AQDAAQYTK.[E]		FALSE	0.000350292	0.000572698	1	1	25	Q9LW12	Q9LW12 [134-142]		0	995.479	0	1.36	0.96464	0	724818	533080		High	High	High	0.0001305	6.732e-05	3.28	34.55	K.AQDAAQYTK.E	[134-142]	Used	Used
[R].DKTGGFLSQTGEHVK.[Q]		FALSE	2.15256e-05	0.000572698	1	1	13	Q9LW12	Q9LW12 [161-175]		1	1603.81	0	0.809	0.807463	0	1.27294e+06	1.57361e+06		High	High	High	0.0001305	3.971e-06	4.44	69.45	R.DKTGGFLSQTGEHVK.Q	[161-175]	Used	Used
[K].DKAGSYLSETGEAIKNK.[A]		FALSE	1.29479e-07	0.000572698	1	1	4	Q9LW12	Q9LW12 [117-133]		2	1810.92	0	0.01	5.76991e-17			143299		Not Found	High	High	0.0001305	2.205e-08	4.93	80.61	K.DKAGSYLSETGEAIKNK.A	[117-133]	Used	Used
[K].DKAGSYLSETGEAIK.[N]		FALSE	1.03435e-05	0.000572698	1	1	9	Q9LW12	Q9LW12 [117-131]		1	1568.78	0	2.814	0.865712	0	959168	340824		High	High	High	0.0001305	1.883e-06	5.09	85.49	K.DKAGSYLSETGEAIK.N	[117-131]	Used	Used
[R].TTDPTHQTYQR.[K]		FALSE	0.000298435	0.000572698	1	1	20	Q9LW12	Q9LW12 [214-224]		0	1347.63	0	1.265	0.945037	0	1.87306e+06	1.48082e+06		High	High	High	0.0001305	5.724e-05	1.91	39.19	R.TTDPTHQTYQR.K	[214-224]	Used	Used
[K].ETAQGAAQYTK.[E]		FALSE	0.000162959	0.000572698	1	1	32	Q9LW12	Q9LW12 [143-153]		0	1167.56	0	1.908	0.966045	0	1.63514e+06	857034		High	High	High	0.0001305	3.099e-05	3.96	42.26	K.ETAQGAAQYTK.E	[143-153]	Used	Used
[K].AHETAQSAKDKTSQTAQAAQQK.[A]		FALSE	0.000241227	0.000572698	1	1	4	Q9LW12	Q9LW12 [50-71]		2	2328.15	0	0.01	5.76991e-17			21402.8		Not Found	High	High	0.0001305	4.627e-05	3.11	42.96	K.AHETAQSAKDKTSQTAQAAQQK.A	[50-71]	Used	Used
[K].AGSYLSETGEAIK.[N]		FALSE	4.06656e-05	0.000572698	1	1	5	Q9LW12	Q9LW12 [119-131]		0	1325.66	0	5.935	0.419912	0	5.32469e+06	897220		High	High	High	0.0001305	7.58e-06	4.53	87.23	K.AGSYLSETGEAIK.N	[119-131]	Used	Used
[K].AGSYLSETGEAIKNK.[A]		FALSE	0.000543181	0.000572698	1	1	4	Q9LW12	Q9LW12 [119-133]		1	1567.8	0	0.01	5.76991e-17			390279		Not Found	High	High	0.0001305	0.0001054	4.8	78.92	K.AGSYLSETGEAIKNK.A	[119-133]	Used	Used
[K].QMAMGAADAVK.[H]	1xOxidation [M]	FALSE	0.00204677	0.000987479	1	1	27	Q9LW12	Q9LW12 [176-186]		0	1108.51	0	2.148	0.940392	0	724449	337329		High	High	High	0.0001991	0.0004094	3.04	65.62	K.QMAMGAADAVK.H	[176-186]	Used	Used
[K].NKAQDAAQYTK.[E]		FALSE	0.00244637	0.000987479	1	1	9	Q9LW12	Q9LW12 [132-142]		1	1237.62	0	0.01	5.76991e-17			106129		Not Found	High	High	0.0001991	0.000493	3.66	36.23	K.NKAQDAAQYTK.E	[132-142]	Used	Used
[K].TGQAMGTMR.[D]	1xOxidation [M]	FALSE	0.0032935	0.00143413	1	1	27	Q9LW12	Q9LW12 [21-29]		0	968.429	0	1.314	0.960358	0	341702	260089		High	High	High	0.0002813	0.0006726	2.36	42.55	K.TGQAMGTMR.D	[21-29]	Used	Used
[K].QMAMGAADAVK.[H]		FALSE	0.00270107	0.00143413	1	1	17	Q9LW12	Q9LW12 [176-186]		0	1092.52	0	2.291	0.925547	0	2.62311e+06	1.14479e+06		High	High	High	0.0002813	0.0005475	2.38	66.61	K.QMAMGAADAVK.H	[176-186]	Used	Used
[K].AHETTQAAK.[E]		FALSE	0.020161	0.0029934	1	1	1	Q9LW12	Q9LW12 [94-102]		0	956.48	0	11.096	0.148314	0	11930.5	1075.23		High	Peak Found	High	0.0006192	0.004454	2.38	15.83	K.AHETTQAAK.E	[94-102]	Used	Used
[K].QMAMGAADAVK.[H]	2xOxidation [M2; M4]	FALSE	0.0597842	0.00545717	1	1	3	Q9LW12	Q9LW12 [176-186]		0	1124.51	0	2.674	0.993683	0	18201.5	6807.72		High	Peak Found	High	0.00142	0.01365	2.57	33.37	K.QMAMGAADAVK.H	[176-186]	Used	Used
[K].ETAEAGRDK.[T]		FALSE	0.11422	0.00819423	1	1	1	Q9LW12	Q9LW12 [154-162]		1	976.469	0	33.96	0.00128796	0	16791.7	494.455		High	Peak Found	High	0.002129	0.02555	2.19	16.03	K.ETAEAGRDK.T	[154-162]	Used	Used
Q9FVT2	Probable elongation factor 1-gamma 2 OS=Arabidopsis thaliana OX=3702 GN=At1g57720 PE=1 SV=1	0	FALSE	23.674	20	6	17	5	413	46.4	5.71	47.94	6	1	2.433	0.999265	17.14	218675	91847.1	High	High	1		1.28274	-0.386142
Annotated Sequence	Modifications	Contaminant	Qvality PEP	Qvality q-value	# Protein Groups	# Proteins	# PSMs	Master Protein Accessions	Positions in Master Proteins	Modifications in Master Proteins	# Missed Cleavages	Theo. MH+ [Da]	# Razor Quan Results	Abundance Ratio: (F4) / (F3)	Abundance Ratio Adj. P-Value: (F4) / (F3)	Abundance Ratio Variability [%]: (F4) / (F3)	Abundances (Grouped): F4	Abundances (Grouped): F3	Quan Info	Found in Sample: [S4] F4: Sample	Found in Sample: [S3] F3: Sample	Confidence (by Search Engine): Sequest HT	Percolator q-Value (by Search Engine): Sequest HT	Percolator PEP (by Search Engine): Sequest HT	XCorr (by Search Engine): Sequest HT	Top Apex RT [min]	Sequence in Protein	Positions in Proteins	Quan Usage	Quan Ratio Usage
[R].DAGINVCSGGIIGLGEAEEDR.[I]	1xCarbamidomethyl [C7]; 1xDeamidated [N5]	FALSE	0.013885	0.00190722	1	1	1	P54967	P54967 [225-245]		0	2132.98	0	100	5.76991e-17		27598.1			High	Not Found	High	0.0004264	0.003009	3.85	96.81	R.DAGINVCSGGIIGLGEAEEDR.I	[225-245]	Used	Used
P49691	60S ribosomal protein L4-2 OS=Arabidopsis thaliana OX=3702 GN=RPL4D PE=1 SV=2	0	FALSE	16.865	14	5	12	1	407	44.7	10.3	21.22	5	0	100	1.11183e-16		56009.9		High	Not Found	1		6.64386	-2
Annotated Sequence	Modifications	Contaminant	Qvality PEP	Qvality q-value	# Protein Groups	# Proteins	# PSMs	Master Protein Accessions	Positions in Master Proteins	Modifications in Master Proteins	# Missed Cleavages	Theo. MH+ [Da]	# Razor Quan Results	Abundance Ratio: (F4) / (F3)	Abundance Ratio Adj. P-Value: (F4) / (F3)	Abundance Ratio Variability [%]: (F4) / (F3)	Abundances (Grouped): F4	Abundances (Grouped): F3	Quan Info	Found in Sample: [S4] F4: Sample	Found in Sample: [S3] F3: Sample	Confidence (by Search Engine): Sequest HT	Percolator q-Value (by Search Engine): Sequest HT	Percolator PEP (by Search Engine): Sequest HT	XCorr (by Search Engine): Sequest HT	Top Apex RT [min]	Sequence in Protein	Positions in Proteins	Quan Usage	Quan Ratio Usage
[K].LGEYNIDVLEGNEQFINAAK.[L]		TRUE	5.02632e-07	0.000572698	1	1	23	P00761	P00761 [283-302]		0	2237.11	3	0.833	0.822921	0	1.15764e+06	1.38957e+06		High	High	High	0.0001305	3.479e-07	4.3	132.14	K.LGEYNIDVLEGNEQFINAAK.L	[283-302]	Used	Used
[R].LGEHNIDVLEGNEQFINAAK.[I]	1xDeamidated [Q/N]	TRUE	2.71873e-07	0.000572698	1	1	48	P00761	P00761 [58-77]		0	2212.09	0	0.802	0.800659	0	2.65455e+06	3.30952e+06		High	High	High	0.0001305	4.692e-08	6.56	121.02	R.LGEHNIDVLEGNEQFINAAK.I	[58-77]	Used	Used
[R].LGEHNIDVLEGNEQFINAAK.[I]		TRUE	6.71532e-07	0.000572698	1	1	121	P00761	P00761 [58-77]		0	2211.1	0	0.905	0.853941	0	1.4903e+07	1.6465e+07		High	High	High	0.0001305	1.172e-07	4.7	123.28	R.LGEHNIDVLEGNEQFINAAK.I	[58-77]	Used	Used
[R].LGEHGPVDVLEGNEQFINAAK.[L]	1xDeamidated [N]	TRUE	9.49872e-07	0.000572698	1	1	3	P00761	P00761 [241-261]		0	2238.1	0	12.537	0.0818377	0	759623	60592.7		High	High	High	0.0001305	6.213e-06	4.43	131.88	R.LGEHGPVDVLEGNEQFINAAK.L	[241-261]	Used	Used
[R].LGEHGPVDVLEGNEQFINAAK.[L]		TRUE	1.36379e-05	0.000572698	1	1	7	P00761	P00761 [241-261]		0	2237.12	0						No Quan Values	High	High	High	0.0001305	2.495e-06	4.14	132.14	R.LGEHGPVDVLEGNEQFINAAK.L	[241-261]	Not Used	Not Used
[K].LGEYNIDVLEGNEQFINAAK.[L]	1xDeamidated [N]	TRUE	4.67662e-08	0.000572698	1	1	3	P00761	P00761 [283-302]		0	2238.09	0	1.9	0.929173	0	36993.4	19465.6		High	Peak Found	High	0.0001305	7.833e-06	3.85	128.79	K.LGEYNIDVLEGNEQFINAAK.L	[283-302]	Used	Used
[K].LGGNHNIDVLEGNEQFINAAK.[L]	1xDeamidated [N4]	TRUE	0.000341319	0.000572698	1	1	1	P00761	P00761 [262-282]		0	2254.11	0						No Quan Values	High	Not Found	High	0.0001305	6.56e-05	3.79		K.LGGNHNIDVLEGNEQFINAAK.L	[262-282]	Not Used	Not Used
[KR].IITHPNFNGNTLDNDIMLIK.[L]	2xDeamidated [N]; 1xOxidation [M17]	TRUE	8.30539e-06	0.000572698	1	2	28	P00761	P00761 [78-97]; [343-362]; [562-581]		0	2301.14	0	3.908	0.701619	0	739364	189203		High	High	High	0.0001305	1.509e-06	5.58	131.3	K.IITHPNFNGNTLDNDIMLIK.L; R.IITHPNFNGNTLDNDIMLIK.L; R.IITHPNFNGNTLDNDIMLIK.L	[78-97]; [343-362]; [562-581]	Used	Used
[KR].IITHPNFNGNTLDNDIMLIK.[L]	1xDeamidated [N]; 1xOxidation [M17]	TRUE	7.17234e-07	0.000572698	1	2	52	P00761	P00761 [78-97]; [343-362]; [562-581]		0	2300.16	0	0.854	0.834087	0	2.17138e+06	2.54235e+06		High	High	High	0.0001305	1.258e-07	6.12	140.1	K.IITHPNFNGNTLDNDIMLIK.L; R.IITHPNFNGNTLDNDIMLIK.L; R.IITHPNFNGNTLDNDIMLIK.L	[78-97]; [343-362]; [562-581]	Used	Used
[KR].IITHPNFNGNTLDNDIMLIK.[L]	1xOxidation [M17]	TRUE	5.65015e-05	0.000572698	1	2	2	P00761	P00761 [78-97]; [343-362]; [562-581]		0	2299.18	0	1.931	0.965157	0	135788	70336.9		High	High	High	0.0001305	1.059e-05	2.64	134.94	K.IITHPNFNGNTLDNDIMLIK.L; R.IITHPNFNGNTLDNDIMLIK.L; R.IITHPNFNGNTLDNDIMLIK.L	[78-97]; [343-362]; [562-581]	Used	Used
[KR].IITHPNFNGNTLDNDIMLIK.[L]	3xDeamidated [N8; N10; N]	TRUE	6.61057e-06	0.000572698	1	2	4	P00761	P00761 [78-97]; [343-362]; [562-581]		0	2286.13	0	100	5.76991e-17		93764.2			High	High	High	0.0001305	1.195e-06	4.64	141.78	K.IITHPNFNGNTLDNDIMLIK.L; R.IITHPNFNGNTLDNDIMLIK.L; R.IITHPNFNGNTLDNDIMLIK.L	[78-97]; [343-362]; [562-581]	Used	Used
[KR].IITHPNFNGNTLDNDIMLIK.[L]	2xDeamidated [N]	TRUE	3.51351e-06	0.000572698	1	2	29	P00761	P00761 [78-97]; [343-362]; [562-581]		0	2285.15	0	0.752	0.762777	0	2.43953e+06	3.24296e+06		High	High	High	0.0001305	6.3e-07	5.31	139.4	K.IITHPNFNGNTLDNDIMLIK.L; R.IITHPNFNGNTLDNDIMLIK.L; R.IITHPNFNGNTLDNDIMLIK.L	[78-97]; [343-362]; [562-581]	Used	Used
[KR].IITHPNFNGNTLDNDIMLIK.[L]	1xDeamidated [N]	TRUE	3.70353e-06	0.000572698	1	2	70	P00761	P00761 [78-97]; [343-362]; [562-581]		0	2284.16	0	0.569	0.595173	0	6.23985e+06	1.09654e+07		High	High	High	0.0001305	6.65e-07	5.85	146.36	K.IITHPNFNGNTLDNDIMLIK.L; R.IITHPNFNGNTLDNDIMLIK.L; R.IITHPNFNGNTLDNDIMLIK.L	[78-97]; [343-362]; [562-581]	Used	Used
[KR].IITHPNFNGNTLDNDIMLIK.[L]		TRUE	7.94874e-06	0.000572698	1	2	9	P00761	P00761 [78-97]; [343-362]; [562-581]		0	2283.18	0	0.81	0.807758	0	1.04852e+06	1.29391e+06		High	High	High	0.0001305	1.444e-06	3.77	142.39	K.IITHPNFNGNTLDNDIMLIK.L; R.IITHPNFNGNTLDNDIMLIK.L; R.IITHPNFNGNTLDNDIMLIK.L	[78-97]; [343-362]; [562-581]	Used	Used
[R].LSSPATLDSR.[S]		TRUE	0.00254524	0.000987479	1	1	4	P00761	P00761 [680-689]		0	1046.55	0						No Quan Values	High	High	High	0.0001991	0.0005143	2.6	64.84	R.LSSPATLDSR.S	[680-689]	Not Used	Not Used
[KR].LSSPATLNSR.[VQS]		TRUE	0.00219816	0.000987479	2	3	30	P00761; PromTArt5	P00761 [98-107]; [363-372]; [582-591]; PromTArt5 [41-50]		0	1045.56	0	0.952	0.874632	0	1.69499e+07	1.78101e+07	Shared	High	High	High	0.0001991	0.0004412	2.72	60.58	K.LSSPATLNSR.V; K.LSSPATLNSR.Q; K.LSSPATLNSR.Q	[98-107]; [363-372]; [582-591]	Used	Used
[KR].LSSPATLNSR.[VQS]	1xDeamidated [N8]	TRUE	0.00195938	0.000987479	2	3	5	P00761; PromTArt5	P00761 [98-107]; [363-372]; [582-591]; PromTArt5 [41-50]		0	1046.55	1	0.968	0.87968	0	1.37506e+06	1.42061e+06	Shared	High	High	High	0.0001991	0.0003914	3.28	64.84	K.LSSPATLNSR.V; K.LSSPATLNSR.Q; K.LSSPATLNSR.Q	[98-107]; [363-372]; [582-591]	Used	Used
[KR].IITHPNFNGNTLDNDIMLIK.[L]	3xDeamidated [N8; N10; N14]; 1xOxidation [M17]	TRUE	0.00266916	0.000987479	1	2	2	P00761	P00761 [78-97]; [343-362]; [562-581]		0	2302.13	0	0.671	0.108348	0	17573.4	26198.4		Peak Found	High	High	0.0001991	0.0005416	3.02	134.3	K.IITHPNFNGNTLDNDIMLIK.L; R.IITHPNFNGNTLDNDIMLIK.L; R.IITHPNFNGNTLDNDIMLIK.L	[78-97]; [343-362]; [562-581]	Used	Used
[R-].LATVSLPR.[LV-]		TRUE	0.00195938	0.000987479	1	3	10	P00761	P00761 [421-428]; [429-436]; [482-489]; [632-639]		0	856.525	1	1.126	0.925353	0	1.74637e+06	1.5516e+06		High	High	High	0.0001991	0.0003919	2.42	75.92	R.LATVSLPR.L; R.LATVSLPR.V; R.LATVSLPR.V; R.LATVSLPR.L	[421-428]; [429-436]; [482-489]; [632-639]	Used	Used
[R].VATVSLPR.[S]		TRUE	0.00466647	0.00166669	1	1	62	P00761	P00761 [108-115]		0	842.509	0	0.934	0.865712	0	6.04009e+07	6.4674e+07		High	High	High	0.0003407	0.0009689	1.12	74.05	R.VATVSLPR.S	[108-115]	Used	Used
[R].IITHPNFNGNTLDNDIMLIR.[L]	1xDeamidated [N10]	TRUE	0.00365368	0.00166669	2	2	1	P00761; PromTArt5	P00761 [660-679]; PromTArt5 [21-40]		0	2312.17	0	13.751	0.0637503	0	309442	22503.7	Shared	High	Peak Found	High	0.002129	0.02524	2.39	148.43	R.IITHPNFNGNTLDNDIMLIR.L	[660-679]	Used	Used
[R].VVTVSLPR.[L]		TRUE	0.0197274	0.0029934	1	2	14	P00761	P00761 [413-420]; [474-481]; [624-631]		0	870.541	1	1.328	0.963438	0	2.99656e+06	2.25609e+06		High	High	High	0.0006192	0.004352	2.26	79.79	R.VVTVSLPR.L; R.VVTVSLPR.L; R.VVTVSLPR.L	[413-420]; [474-481]; [624-631]	Used	Used
[KR].NKPGVYTK.[VN]		TRUE	0.0185876	0.0029934	1	2	5	P00761	P00761 [209-216]; [708-715]		0	906.504	0	0.573	0.598414	0	308147	538047		High	High	High	0.0006192	0.004084	1.77	26.63	K.NKPGVYTK.N; R.NKPGVYTK.V	[209-216]; [708-715]	Used	Used
[R].ALTVSLPR.[V]		TRUE	0.0478248	0.00486181	1	2	1	P00761	P00761 [405-412]; [616-623]		0	856.525	0						No Quan Values	High	Peak Found	High	0.001133	0.0109	2.24	75.92	R.ALTVSLPR.V; R.ALTVSLPR.V	[405-412]; [616-623]	Not Used	Not Used
[KR].LGEHNIDVLEGNEQFINAARIITHPNFNGNTLDNDIMLIK.[L]	2xDeamidated [Q14; N34]	TRUE	0.0590142	0.00545717	1	2	1	P00761	P00761 [323-362]; [542-581]		1	4505.24	0						No Quan Values	Not Found	High	High	0.001365	0.01344	4.12		K.LGEHNIDVLEGNEQFINAARIITHPNFNGNTLDNDIMLIK.L; K.LGEHNIDVLEGNEQFINAARIITHPNFNGNTLDNDIMLIK.L	[323-362]; [542-581]	Not Used	Not Used
Q39172	NADPH-dependent oxidoreductase 2-alkenal reductase OS=Arabidopsis thaliana OX=3702 GN=AER PE=1 SV=1	0	FALSE	29.64	25	5	14	5	345	38.1	6.18	52.92	5	0	6.49	0.212017	82.62	346502	123003	High	High	1		2.69822	-0.812245
Annotated Sequence	Modifications	Contaminant	Qvality PEP	Qvality q-value	# Protein Groups	# Proteins	# PSMs	Master Protein Accessions	Positions in Master Proteins	Modifications in Master Proteins	# Missed Cleavages	Theo. MH+ [Da]	# Razor Quan Results	Abundance Ratio: (F4) / (F3)	Abundance Ratio Adj. P-Value: (F4) / (F3)	Abundance Ratio Variability [%]: (F4) / (F3)	Abundances (Grouped): F4	Abundances (Grouped): F3	Quan Info	Found in Sample: [S4] F4: Sample	Found in Sample: [S3] F3: Sample	Confidence (by Search Engine): Sequest HT	Percolator q-Value (by Search Engine): Sequest HT	Percolator PEP (by Search Engine): Sequest HT	XCorr (by Search Engine): Sequest HT	Top Apex RT [min]	Sequence in Protein	Positions in Proteins	Quan Usage	Quan Ratio Usage
[R].YHPEVDPDEVNALAQLMTWK.[T]		FALSE	0.00044982	0.000572698	2	2	3	Q38946; Q43314	Q38946 [71-90]; Q43314 [71-90]		0	2356.13	0						No Quan Values	Not Found	High	High	0.0002813	0.0005847	2.01		R.YHPEVDPDEVNALAQLMTWK.T	[71-90]	Not Used	Not Used
[K].VVAVSDITGAIR.[N]		FALSE	0.000383554	0.000572698	1	1	1	Q38946	Q38946 [232-243]		0	1200.69	0	8.157	0.232821	0	26787.1	3283.82		High	Peak Found	High	0.0001305	7.406e-05	1.14	114.47	K.VVAVSDITGAIR.N	[232-243]	Used	Used
[K].FIVEAANHPTDPDADEILSK.[K]		FALSE	0.00513997	0.00166669	1	1	1	Q38946	Q38946 [306-325]		0	2182.07	0	4.907	0.6324	0	32654.1	6653.94		High	Peak Found	High	0.0003407	0.001074	2.74	112.44	K.FIVEAANHPTDPDADEILSK.K	[306-325]	Used	Used
[R].MGAFTLGVNR.[V]		FALSE	0.00427888	0.00166669	2	2	1	Q38946; Q43314	Q38946 [390-399]; Q43314 [390-399]		0	1065.55	0	2.466	0.999906	0	29117.2	11806.4	Shared	High	Peak Found	High	0.0003407	0.0008851	1.99	106.8	R.MGAFTLGVNR.V	[390-399]	Not Used	Not Used
Q9SGA6	40S ribosomal protein S19-1 OS=Arabidopsis thaliana OX=3702 GN=RPS19A PE=2 SV=1	0	FALSE	15.692	30	5	12	1	143	15.8	10.08	28.13	5	0	6.752	0.239551	0	23785.9	3522.99	High	Peak Found	1		2.75531	-0.829432
Annotated Sequence	Modifications	Contaminant	Qvality PEP	Qvality q-value	# Protein Groups	# Proteins	# PSMs	Master Protein Accessions	Positions in Master Proteins	Modifications in Master Proteins	# Missed Cleavages	Theo. MH+ [Da]	# Razor Quan Results	Abundance Ratio: (F4) / (F3)	Abundance Ratio Adj. P-Value: (F4) / (F3)	Abundance Ratio Variability [%]: (F4) / (F3)	Abundances (Grouped): F4	Abundances (Grouped): F3	Quan Info	Found in Sample: [S4] F4: Sample	Found in Sample: [S3] F3: Sample	Confidence (by Search Engine): Sequest HT	Percolator q-Value (by Search Engine): Sequest HT	Percolator PEP (by Search Engine): Sequest HT	XCorr (by Search Engine): Sequest HT	Top Apex RT [min]	Sequence in Protein	Positions in Proteins	Quan Usage	Quan Ratio Usage
[K].LDATANDIPSDTFDVK.[G]		FALSE	0.00012213	0.000572698	1	1	7	Q9SRG3	Q9SRG3 [430-445]		0	1721.82	0	3.102	0.923336	0	62944.8	20290.9		High	High	High	0.0001305	2.315e-05	4.16	112.42	K.LDATANDIPSDTFDVK.G	[430-445]	Used	Used
[K].LSGDEFDSFMALAEK.[L]		FALSE	0.000829472	0.000572698	1	1	1	Q9SRG3	Q9SRG3 [170-184]		0	1659.76	0	6.068	0.46919	0	26991.2	4447.84		High	Peak Found	High	0.0001305	0.0001618	2.98	160.77	K.LSGDEFDSFMALAEK.L	[170-184]	Used	Used
[KR].SASGNVVVYEGDR.[T]		FALSE	0.000271261	0.000572698	2	2	6	Q9XI01; Q9SRG3	Q9XI01 [456-468]; Q9SRG3 [454-466]		0	1352.64	0	3.659	0.743537	0	259746	70984.4	Shared	High	High	High	0.0001305	5.207e-05	4.24	68.1	R.SASGNVVVYEGDR.T	[454-466]	Not Used	Not Used
[K].VNVEVDQIESWFK.[D]		FALSE	3.36754e-05	0.000572698	1	1	8	Q9SRG3	Q9SRG3 [338-350]		0	1592.8	0	14.375	0.0359602	0	23649	1645.17		High	Peak Found	High	0.0001305	6.265e-06	4.54	164.97	K.VNVEVDQIESWFK.D	[338-350]	Used	Used
[K].VVVAESLDDIVFK.[S]		FALSE	0.000141084	0.000572698	1	1	2	Q9SRG3	Q9SRG3 [376-388]		0	1433.79	0	100	5.76991e-17		30056			High	Not Found	High	0.0001305	2.676e-05	3.42	148.06	K.VVVAESLDDIVFK.S	[376-388]	Used	Used
[K].IDASEEANKEFANEYK.[I]		FALSE	0.00633042	0.00166669	1	1	2	Q9SRG3	Q9SRG3 [87-102]		1	1857.85	0	5.033	0.578654	0	112505	22352.4		High	High	High	0.0003948	0.001332	1.93	86.48	K.IDASEEANKEFANEYK.I	[87-102]	Used	Used
[R].EAEGIVTYLK.[K]		FALSE	0.00366836	0.00166669	2	2	5	Q9XI01; Q9SRG3	Q9XI01 [128-137]; Q9SRG3 [127-136]		0	1122.6	0						No Quan Values	High	High	High	0.0003407	0.0007554	1.77	109.03	R.EAEGIVTYLK.K	[127-136]	Not Used	Not Used
[K].NVVAVGVFPK.[L]		FALSE	0.0061373	0.00166669	1	1	2	Q9SRG3	Q9SRG3 [160-169]		0	1029.61	0	4.948	0.633838	0	61113.8	12350.6		High	High	High	0.0003948	0.001288	2.12	105.82	K.NVVAVGVFPK.L	[160-169]	Used	Used
[K].SQPIPAENNEPVK.[V]		FALSE	0.076796	0.00598748	2	2	4	Q9XI01; Q9SRG3	Q9XI01 [365-377]; Q9SRG3 [363-375]		0	1422.72	0	5.149	0.55902	0	131982	25635	Shared	High	Peak Found	High	0.00163	0.0174	1.58	62.03	K.SQPIPAENNEPVK.V	[363-375]	Not Used	Not Used
P11574	V-type proton ATPase subunit B1 OS=Arabidopsis thaliana OX=3702 GN=VHA-B1 PE=2 SV=2	0	FALSE	21.924	18	5	13	5	486	54.1	5.1	37.2	5	0	4.998	0.488798	54.56	173790	37758.7	High	High	1		2.32135	-0.698796
Annotated Sequence	Modifications	Contaminant	Qvality PEP	Qvality q-value	# Protein Groups	# Proteins	# PSMs	Master Protein Accessions	Positions in Master Proteins	Modifications in Master Proteins	# Missed Cleavages	Theo. MH+ [Da]	# Razor Quan Results	Abundance Ratio: (F4) / (F3)	Abundance Ratio Adj. P-Value: (F4) / (F3)	Abundance Ratio Variability [%]: (F4) / (F3)	Abundances (Grouped): F4	Abundances (Grouped): F3	Quan Info	Found in Sample: [S4] F4: Sample	Found in Sample: [S3] F3: Sample	Confidence (by Search Engine): Sequest HT	Percolator q-Value (by Search Engine): Sequest HT	Percolator PEP (by Search Engine): Sequest HT	XCorr (by Search Engine): Sequest HT	Top Apex RT [min]	Sequence in Protein	Positions in Proteins	Quan Usage	Quan Ratio Usage
[K].MLSEIGTVENIPEFIEGVK.[N]		FALSE	0.000136834	0.000572698	1	1	1	Q9SJH7	Q9SJH7 [329-347]		0	2105.08	0						No Quan Values	High	Not Found	High	0.0001305	2.597e-05	3.11		K.MLSEIGTVENIPEFIEGVK.N	[329-347]	Not Used	Not Used
[K].LYDPGYLNTAPVR.[S]		FALSE	0.000261997	0.000572698	1	2	7	Q9SJH7	Q9SJH7 [89-101]		0	1478.76	0	4.676	0.675037	0	64870.2	13874		High	High	High	0.0001305	5.018e-05	3.61	108.19	K.LYDPGYLNTAPVR.S	[89-101]	Used	Used
[R].IVTDDSKESDKLGQVATSNASR.[R]		FALSE	0.00144174	0.000987479	1	1	3	Q9SJH7	Q9SJH7 [480-501]		2	2321.16	0	1.389	0.726492	0	15218.7	10958.4		Peak Found	High	High	0.0001991	0.000285	3.02	69.52	R.IVTDDSKESDKLGQVATSNASR.R	[480-501]	Used	Used
[R].SSISYIDGDEGILR.[Y]		FALSE	0.00294707	0.00143413	1	2	1	Q9SJH7	Q9SJH7 [102-115]		0	1524.75	0	5.145	0.595173	0	58606.8	11391.7		High	Peak Found	High	0.0002813	0.0006004	3.28	120.57	R.SSISYIDGDEGILR.Y	[102-115]	Used	Used
Q01525	14-3-3-like protein GF14 omega OS=Arabidopsis thaliana OX=3702 GN=GRF2 PE=2 SV=2	0	FALSE	25.575	20	5	24	1	259	29.1	4.79	72.34	5	0	4.635	0.574894	0	81835.4	17656.1	High	High	1		2.21257	-0.66605
Annotated Sequence	Modifications	Contaminant	Qvality PEP	Qvality q-value	# Protein Groups	# Proteins	# PSMs	Master Protein Accessions	Positions in Master Proteins	Modifications in Master Proteins	# Missed Cleavages	Theo. MH+ [Da]	# Razor Quan Results	Abundance Ratio: (F4) / (F3)	Abundance Ratio Adj. P-Value: (F4) / (F3)	Abundance Ratio Variability [%]: (F4) / (F3)	Abundances (Grouped): F4	Abundances (Grouped): F3	Quan Info	Found in Sample: [S4] F4: Sample	Found in Sample: [S3] F3: Sample	Confidence (by Search Engine): Sequest HT	Percolator q-Value (by Search Engine): Sequest HT	Percolator PEP (by Search Engine): Sequest HT	XCorr (by Search Engine): Sequest HT	Top Apex RT [min]	Sequence in Protein	Positions in Proteins	Quan Usage	Quan Ratio Usage
[K].KTEGEFFEAEKEEK.[K]		FALSE	0.00060429	0.000572698	2	3	2	Q9C9C6; Q9FZ76	Q9C9C6 [171-184]; Q9FZ76 [171-184]		2	1700.8	0	1.813	0.933727	0	58337.7	32168.9	Shared	High	Peak Found	High	0.0001305	0.0001172	3.79	68.28	K.KTEGEFFEAEKEEK.K	[171-184]	Not Used	Not Used
[R].VNQAYVIGTSTK.[VI]		FALSE	0.000253045	0.000572698	2	3	1	Q9C9C6; Q9FZ76	Q9C9C6 [134-145]; Q9FZ76 [134-145]		0	1280.68	0	2.728	0.87765	0	215125	78870.2	Shared	High	Peak Found	High	0.0001305	4.843e-05	4.2	71.02	R.VNQAYVIGTSTK.I	[134-145]	Not Used	Not Used
[K].IDISGVNTEK.[F]		FALSE	0.00290072	0.00143413	1	1	1	Q9FZ76	Q9FZ76 [146-155]		0	1075.56	0	4.397	0.623073	0	178096	40503.3		High	Peak Found	High	0.0002813	0.0005904	2.9	71.9	K.IDISGVNTEK.F	[146-155]	Used	Used
O04983	Biotin carboxylase, chloroplastic OS=Arabidopsis thaliana OX=3702 GN=CAC2 PE=1 SV=1	0	FALSE	15.77	14	5	6	5	537	58.4	7.25	16	5	0	4.412	0.635938	24.15	170818	23295.9	High	Peak Found	1		2.14143	-0.644636
Annotated Sequence	Modifications	Contaminant	Qvality PEP	Qvality q-value	# Protein Groups	# Proteins	# PSMs	Master Protein Accessions	Positions in Master Proteins	Modifications in Master Proteins	# Missed Cleavages	Theo. MH+ [Da]	# Razor Quan Results	Abundance Ratio: (F4) / (F3)	Abundance Ratio Adj. P-Value: (F4) / (F3)	Abundance Ratio Variability [%]: (F4) / (F3)	Abundances (Grouped): F4	Abundances (Grouped): F3	Quan Info	Found in Sample: [S4] F4: Sample	Found in Sample: [S3] F3: Sample	Confidence (by Search Engine): Sequest HT	Percolator q-Value (by Search Engine): Sequest HT	Percolator PEP (by Search Engine): Sequest HT	XCorr (by Search Engine): Sequest HT	Top Apex RT [min]	Sequence in Protein	Positions in Proteins	Quan Usage	Quan Ratio Usage
[R].IVEQLLSR.[G]		FALSE	0.00369793	0.00166669	1	1	2	Q8H124	Q8H124 [62-69]		0	957.573	0	4.372	0.760657	0	27015.4	6179.69		High	Peak Found	High	0.0003407	0.0007613	2.01	89.58	R.IVEQLLSR.G	[62-69]	Used	Used
Q9MA93	Glucose and ribitol dehydrogenase homolog 2 OS=Arabidopsis thaliana OX=3702 GN=At3g05260 PE=2 SV=1	0	FALSE	26.763	22	5	30	5	289	31.4	6.52	75.19	5	0	1.433	0.655952	26.89	617420	516471	High	High	1		0.519039	-0.156246
Annotated Sequence	Modifications	Contaminant	Qvality PEP	Qvality q-value	# Protein Groups	# Proteins	# PSMs	Master Protein Accessions	Positions in Master Proteins	Modifications in Master Proteins	# Missed Cleavages	Theo. MH+ [Da]	# Razor Quan Results	Abundance Ratio: (F4) / (F3)	Abundance Ratio Adj. P-Value: (F4) / (F3)	Abundance Ratio Variability [%]: (F4) / (F3)	Abundances (Grouped): F4	Abundances (Grouped): F3	Quan Info	Found in Sample: [S4] F4: Sample	Found in Sample: [S3] F3: Sample	Confidence (by Search Engine): Sequest HT	Percolator q-Value (by Search Engine): Sequest HT	Percolator PEP (by Search Engine): Sequest HT	XCorr (by Search Engine): Sequest HT	Top Apex RT [min]	Sequence in Protein	Positions in Proteins	Quan Usage	Quan Ratio Usage
[K].TVTNFGFR.[G]		FALSE	0.0169668	0.0029934	1	1	2	Q9FZA2	Q9FZA2 [289-296]		0	941.484	0	1.442	0.837035	0	43649.1	30271.4		Peak Found	High	High	0.0006192	0.003714	2.26	95.16	K.TVTNFGFR.G	[289-296]	Used	Used
Q9SRT9	UDP-arabinopyranose mutase 1 OS=Arabidopsis thaliana OX=3702 GN=RGP1 PE=1 SV=1	0	FALSE	16.689	19	5	16	1	357	40.6	5.92	32.69	5	0	4.187	0.673229	0	51204.5	12228.2	High	Peak Found	1		2.06592	-0.621903
Annotated Sequence	Modifications	Contaminant	Qvality PEP	Qvality q-value	# Protein Groups	# Proteins	# PSMs	Master Protein Accessions	Positions in Master Proteins	Modifications in Master Proteins	# Missed Cleavages	Theo. MH+ [Da]	# Razor Quan Results	Abundance Ratio: (F4) / (F3)	Abundance Ratio Adj. P-Value: (F4) / (F3)	Abundance Ratio Variability [%]: (F4) / (F3)	Abundances (Grouped): F4	Abundances (Grouped): F3	Quan Info	Found in Sample: [S4] F4: Sample	Found in Sample: [S3] F3: Sample	Confidence (by Search Engine): Sequest HT	Percolator q-Value (by Search Engine): Sequest HT	Percolator PEP (by Search Engine): Sequest HT	XCorr (by Search Engine): Sequest HT	Top Apex RT [min]	Sequence in Protein	Positions in Proteins	Quan Usage	Quan Ratio Usage
[K].ATQGIYPLQNVFIR.[K]		FALSE	0.000138035	0.000572698	2	2	5	Q9CAV0; Q42262	Q9CAV0 [200-213]; Q42262 [200-213]		0	1619.89	0	1.143	0.673987	0	42088.7	36836	Shared	High	High	High	0.0001305	2.62e-05	3.86	150.73	K.ATQGIYPLQNVFIR.K	[200-213]	Used	Used
[R].VFEVSLADLQGDEDNAYR.[K]		FALSE	7.39614e-07	0.000572698	1	1	1	Q9CAV0	Q9CAV0 [65-82]		0	2040.95	0	2.538	0.997269	0	23461.5	9245.75		High	Peak Found	High	0.0001305	1.296e-07	6.79	143.79	R.VFEVSLADLQGDEDNAYR.K	[65-82]	Used	Used
[K].VDRPADEMAVEEPTEIIGA.[-]		FALSE	0.00366836	0.00166669	1	1	1	Q9CAV0	Q9CAV0 [244-262]		0	2041.97	0	100	5.76991e-17		76326.4			High	Not Found	High	0.0003407	0.0007536	4.61	127.13	K.VDRPADEMAVEEPTEIIGA.-	[244-262]	Used	Used
[R].VFEVSLADLQGDEDNAYRK.[I]		FALSE	0.0067092	0.00166669	1	1	1	Q9CAV0	Q9CAV0 [65-83]		1	2169.05	0	1.451	0.765034	0	23884.9	16465.1		High	Peak Found	High	0.0003948	0.001409	2.05	132.46	R.VFEVSLADLQGDEDNAYRK.I	[65-83]	Used	Used
Q9SMT7	Oxalate--CoA ligase OS=Arabidopsis thaliana OX=3702 GN=AAE3 PE=1 SV=1	0	FALSE	16.704	15	5	18	5	514	55.5	6.54	30.3	5	0	1.448	0.673229	42.04	114678	87823.9	High	High	1		0.534062	-0.160769
Annotated Sequence	Modifications	Contaminant	Qvality PEP	Qvality q-value	# Protein Groups	# Proteins	# PSMs	Master Protein Accessions	Positions in Master Proteins	Modifications in Master Proteins	# Missed Cleavages	Theo. MH+ [Da]	# Razor Quan Results	Abundance Ratio: (F4) / (F3)	Abundance Ratio Adj. P-Value: (F4) / (F3)	Abundance Ratio Variability [%]: (F4) / (F3)	Abundances (Grouped): F4	Abundances (Grouped): F3	Quan Info	Found in Sample: [S4] F4: Sample	Found in Sample: [S3] F3: Sample	Confidence (by Search Engine): Sequest HT	Percolator q-Value (by Search Engine): Sequest HT	Percolator PEP (by Search Engine): Sequest HT	XCorr (by Search Engine): Sequest HT	Top Apex RT [min]	Sequence in Protein	Positions in Proteins	Quan Usage	Quan Ratio Usage
[R].SGTPGDASGNKPQTDATGVSATDTASQK.[R]		FALSE	7.28073e-06	0.000572698	1	1	3	Q94AD1	Q94AD1 [18-45]		0	2649.22	0	4.176	0.765034	0	29076.6	6962.45		Peak Found	High	High	0.0001305	1.322e-06	4.53	53.58	R.SGTPGDASGNKPQTDATGVSATDTASQK.R	[18-45]	Used	Used
Q9LF30	40S ribosomal protein S19-2 OS=Arabidopsis thaliana OX=3702 GN=RPS19B PE=2 SV=1	0	FALSE	16.117	30	5	13	1	143	15.8	10.14	26.53	5	3	4.048	0.707304	73.59	225882	81613.7	High	Peak Found	1		2.01721	-0.607241
Annotated Sequence	Modifications	Contaminant	Qvality PEP	Qvality q-value	# Protein Groups	# Proteins	# PSMs	Master Protein Accessions	Positions in Master Proteins	Modifications in Master Proteins	# Missed Cleavages	Theo. MH+ [Da]	# Razor Quan Results	Abundance Ratio: (F4) / (F3)	Abundance Ratio Adj. P-Value: (F4) / (F3)	Abundance Ratio Variability [%]: (F4) / (F3)	Abundances (Grouped): F4	Abundances (Grouped): F3	Quan Info	Found in Sample: [S4] F4: Sample	Found in Sample: [S3] F3: Sample	Confidence (by Search Engine): Sequest HT	Percolator q-Value (by Search Engine): Sequest HT	Percolator PEP (by Search Engine): Sequest HT	XCorr (by Search Engine): Sequest HT	Top Apex RT [min]	Sequence in Protein	Positions in Proteins	Quan Usage	Quan Ratio Usage
[K].TFMTNLVSWEAVSAR.[L]		FALSE	1.78241e-05	0.000572698	1	1	3	P21276	P21276 [189-203]		0	1711.85	0	4.026	0.841733	0	21122.7	5247.09		High	High	High	0.0001305	3.273e-06	4.29	163.74	K.TFMTNLVSWEAVSAR.L	[189-203]	Used	Used
[K].QTLEFHWGK.[H]		FALSE	0.048733	0.00486181	1	1	1	P21276	P21276 [30-38]		0	1145.57	0	100	5.76991e-17		16819.5			High	Not Found	High	0.001133	0.01108	2.29	110.41	K.QTLEFHWGK.H	[30-38]	Used	Used
O82514	Adenylate kinase 4 OS=Arabidopsis thaliana OX=3702 GN=ADK1 PE=1 SV=2	0	FALSE	17.686	25	5	19	4	246	26.9	7.36	50.21	5	1	4.026	0.717404	45.28	217687	68039.2	High	High	1		2.00935	-0.604874
Annotated Sequence	Modifications	Contaminant	Qvality PEP	Qvality q-value	# Protein Groups	# Proteins	# PSMs	Master Protein Accessions	Positions in Master Proteins	Modifications in Master Proteins	# Missed Cleavages	Theo. MH+ [Da]	# Razor Quan Results	Abundance Ratio: (F4) / (F3)	Abundance Ratio Adj. P-Value: (F4) / (F3)	Abundance Ratio Variability [%]: (F4) / (F3)	Abundances (Grouped): F4	Abundances (Grouped): F3	Quan Info	Found in Sample: [S4] F4: Sample	Found in Sample: [S3] F3: Sample	Confidence (by Search Engine): Sequest HT	Percolator q-Value (by Search Engine): Sequest HT	Percolator PEP (by Search Engine): Sequest HT	XCorr (by Search Engine): Sequest HT	Top Apex RT [min]	Sequence in Protein	Positions in Proteins	Quan Usage	Quan Ratio Usage
[R].IFPTFCDQNCR.[K]	2xCarbamidomethyl [C6; C10]	FALSE	0.00062255	0.000572698	1	1	7	Q42330	Q42330 [49-59]		0	1457.63	0	1.465	0.988213	0	1.74738e+06	1.1931e+06		High	High	High	0.0001305	0.0001209	3.26	105.46	R.IFPTFCDQNCR.K	[49-59]	Used	Used
[K].CLKEYGGDVGFSYCAPR.[I]	2xCarbamidomethyl [C1; C14]	FALSE	0.000182538	0.000572698	1	1	4	Q42330	Q42330 [32-48]		1	1978.88	0						No Quan Values	Not Found	High	High	0.0001305	3.471e-05	4.64	104.5	K.CLKEYGGDVGFSYCAPR.I	[32-48]	Not Used	Not Used
[K].EYGGDVGFSYCAPR.[I]	1xCarbamidomethyl [C11]	FALSE	2.54313e-05	0.000572698	1	1	16	Q42330	Q42330 [35-48]		0	1577.67	2	1.544	0.994911	0	828623	536509		High	High	High	0.0001305	4.692e-06	4.58	104.52	K.EYGGDVGFSYCAPR.I	[35-48]	Used	Used
[R].IFPTFCDQNCR.[K]	2xCarbamidomethyl [C6; C10]; 1xDeamidated [N9]	FALSE	0.00146504	0.000987479	1	1	5	Q42330	Q42330 [49-59]		0	1458.61	0	1.698	0.995676	0	172448	101561		High	High	High	0.0001991	0.0002903	3.59	109.52	R.IFPTFCDQNCR.K	[49-59]	Used	Used
[R].IFPTFCDQNCRK.[N]	2xCarbamidomethyl [C6; C10]	FALSE	0.0297878	0.00462251	1	1	1	Q42330	Q42330 [49-60]		1	1585.72	0	0.01	5.76991e-17			47341.2		Not Found	High	High	0.0009067	0.006717	2.52	90.37	R.IFPTFCDQNCRK.N	[49-60]	Used	Used
Q8S4Y1	Acetyl-CoA acetyltransferase, cytosolic 1 OS=Arabidopsis thaliana OX=3702 GN=AAT1 PE=1 SV=1	0	FALSE	15.968	15	5	10	5	403	41.4	6.89	32.3	5	0	1.549	0.754224	69.77	141136	84738.7	High	High	1		0.631337	-0.190051
Annotated Sequence	Modifications	Contaminant	Qvality PEP	Qvality q-value	# Protein Groups	# Proteins	# PSMs	Master Protein Accessions	Positions in Master Proteins	Modifications in Master Proteins	# Missed Cleavages	Theo. MH+ [Da]	# Razor Quan Results	Abundance Ratio: (F4) / (F3)	Abundance Ratio Adj. P-Value: (F4) / (F3)	Abundance Ratio Variability [%]: (F4) / (F3)	Abundances (Grouped): F4	Abundances (Grouped): F3	Quan Info	Found in Sample: [S4] F4: Sample	Found in Sample: [S3] F3: Sample	Confidence (by Search Engine): Sequest HT	Percolator q-Value (by Search Engine): Sequest HT	Percolator PEP (by Search Engine): Sequest HT	XCorr (by Search Engine): Sequest HT	Top Apex RT [min]	Sequence in Protein	Positions in Proteins	Quan Usage	Quan Ratio Usage
[K].GILAADESTGTIGK.[R]		FALSE	0.000334014	0.000572698	2	4	1	Q9SJQ9; Q9LF98	Q9SJQ9 [25-38]; Q9LF98 [25-38]		0	1332.7	0	7.631	0.26504	0	360210	47204.9	Shared	High	Peak Found	High	0.0001305	6.425e-05	4.32	86.47	K.GILAADESTGTIGK.R	[25-38]	Used	Used
[K].GTVELAGTDGETTTQGLDGLGDR.[C]		FALSE	1.38794e-05	0.000572698	1	1	1	Q9LF98	Q9LF98 [107-129]		0	2263.07	1	3.912	0.835489	0	26715.3	6829.3		High	Peak Found	High	0.0001305	3.776e-05	4.71	111.36	K.GTVELAGTDGETTTQGLDGLGDR.C	[107-129]	Used	Used
[K].IGENEPSEHSIHENAYGLAR.[Y]		FALSE	1.79506e-06	0.000572698	1	1	4	Q9LF98	Q9LF98 [149-168]		0	2223.04	0	2.786	0.898399	0	136165	48874.1		High	High	High	0.0001305	3.188e-07	3.93	80.62	K.IGENEPSEHSIHENAYGLAR.Y	[149-168]	Used	Used
[K].VDKGTVELAGTDGETTTQGLDGLGDR.[C]		FALSE	1.98575e-06	0.000572698	1	1	1	Q9LF98	Q9LF98 [104-129]		1	2605.26	1	1.802	0.963438	0	84078.3	46662.1		Peak Found	High	High	0.0001305	3.527e-07	6.39	105.96	K.VDKGTVELAGTDGETTTQGLDGLGDR.C	[104-129]	Used	Used
[R].TVPAAVPAIVFLSGGQSEEEATR.[N]		FALSE	6.90718e-06	0.000572698	2	2	11	Q9SJQ9; Q9LF98	Q9SJQ9 [254-276]; Q9LF98 [254-276]		0	2329.2	0	3.343	0.8931	0	64916.4	19417.9	Shared	High	High	High	0.0001305	1.253e-06	4.85	159.23	R.TVPAAVPAIVFLSGGQSEEEATR.N	[254-276]	Used	Used
[truncated: 3,477 more rows]
