# Supplementary material for: Seed Longevity is Controlled by Metacaspases
Source: Research Square preprint supplement (doi:10.21203/rs.3.rs-2836590/v1), 2023-05-02
Supplement: Supplementary file 2 [file 32dd1b675e9ec3f3af59ff72.xlsx]

## Sheet: MCII RNAseq
RNAseq Dataset from WT (Col-0) and mcaII-a 3 Days old seedlings (Liu et al). DEGs were considered those with log2FC ≥ 0.5 or ≤ -0.5
geneID	col-0 Replicate 1	col-0 Replicate 2	mcaII-a Replicate 1	mcaII-a Replicate 2	Average Col-0	Average mcaII-a	mcaII-a / Col-0	LOG2FC	LOG10	pvalue
AT3G18000	3.03885	5.7227	4.46658	90.2919	4.38078	47.3793	10.8153	3.435	0.374617	0.422069
AT1G43590	1.56773	1.20373	9.71008	6.02581	1.38573	7.86795	5.67783	2.50534	1.13811	0.07276
AT1G72800	1.00113	1.00122	7.70822	1	1.00117	4.35411	4.34901	2.12069	0.373881	0.422784
AT1G48598	6.04691	2.33317	18.481	15.3058	4.19004	16.8934	4.0318	2.01142	1.45529	0.0350515
AT1G16410	2.81849	2.23318	10.2101	6.47109	2.52584	8.34061	3.30211	1.72339	1.03817	0.0915863
AT5G24240	1.48318	1.47374	4.74599	4.94353	1.47846	4.84476	3.2769	1.71233	3.0646	0.000861788
AT1G70760	15.6457	13.0775	45.9996	46.2678	14.3616	46.1337	3.2123	1.68361	2.78327	0.00164716
AT3G01500	206.886	160.63	606.836	522.604	183.758	564.72	3.07318	1.61973	1.80862	0.0155375
AT1G66100	1.272	1.12787	2.38638	4.72661	1.19993	3.55649	2.96391	1.5675	0.73962	0.18213
AT3G16670	8.96093	4.1419	21.1889	16.9593	6.55142	19.0741	2.91145	1.54174	1.22381	0.0597302
AT4G26530	5.65823	5.25134	16.05	15.5699	5.45479	15.81	2.89837	1.53524	3.03518	0.000922199
AT4G04330	2.74677	2.37909	6.64016	7.82824	2.56293	7.2342	2.82263	1.49704	1.76288	0.0172631
AT3G45140	6.67892	8.5703	20.5074	21.5131	7.62461	21.0102	2.75558	1.46236	2.19779	0.00634174
AT1G54040	3.87922	3.42491	10.9948	8.20243	3.65206	9.5986	2.62827	1.39411	1.28238	0.0521936
AT1G51402	1.32945	1.63098	3.62214	3.96371	1.48021	3.79293	2.56242	1.3575	2.01935	0.00956423
AT2G32880	2.70172	1.94091	6.09277	5.75684	2.32132	5.92481	2.55235	1.35183	1.88416	0.0130569
AT5G52050	2.85005	2.62933	6.45225	7.46104	2.73969	6.95664	2.53921	1.34438	1.83378	0.0146628
AT2G30766	1.11822	1.35345	1.35847	4.89299	1.23584	3.12573	2.52925	1.33871	0.400444	0.3977
AT4G32340	11.4766	10.377	27.7155	27.5007	10.9268	27.6081	2.52664	1.33722	2.94845	0.00112602
AT4G22265	1	1	3.17018	1.86336	1	2.51677	2.51677	1.33157	0.835635	0.146004
AT5G45820	5.12929	3.07975	10.8913	9.53837	4.10452	10.2148	2.48868	1.31538	1.41917	0.0380913
AT3G16000	18.0407	14.4129	43.7107	35.7258	16.2268	39.7182	2.44769	1.29142	1.47984	0.0331253
AT3G46780	98.0347	80.9173	233.945	202.022	89.476	217.984	2.43622	1.28465	1.71466	0.0192904
AT2G39470	21.5065	14.5917	45.6229	41.9852	18.0491	43.804	2.42694	1.27914	1.65279	0.0222438
AT1G22690	3.03654	3.79062	8.16916	8.39947	3.41358	8.28432	2.42687	1.2791	2.18793	0.00648745
AT1G35115	3.95141	3.7478	10.3625	7.88093	3.8496	9.12174	2.36953	1.2446	1.28824	0.0514943
AT3G28220	5.09183	5.48911	12.2583	12.6919	5.29047	12.4751	2.35803	1.23758	2.77705	0.00167088
AT3G62410	24.0147	19.2465	52.429	49.3494	21.6306	50.8892	2.35265	1.23429	2.03253	0.00927842
AT3G14210	40.3959	35.6041	84.0168	93.7814	38	88.8991	2.33945	1.22617	1.94982	0.0112247
AT2G39730	899.045	731.321	1967.49	1822.63	815.183	1895.06	2.32471	1.21705	1.98439	0.0103661
AT2G36140	1	1.26172	3.0026	2.20004	1.13086	2.60132	2.3003	1.20182	1.13412	0.0734313
AT3G27690	127.198	103.945	261.001	270.681	115.571	265.841	2.30023	1.20178	2.15801	0.00695005
AT2G29170	1	1.24556	2.63096	2.53311	1.12278	2.58204	2.29969	1.20144	2.09132	0.00810371
AT1G64370	10.0423	5.56252	16.8882	18.6603	7.80241	17.7743	2.27805	1.1878	1.27008	0.0536937
AT3G54830	6.10615	5.5616	14.0816	12.0711	5.83388	13.0763	2.24145	1.16443	1.69772	0.0200577
AT2G29290	9.03402	6.68074	17.622	17.5345	7.85738	17.5783	2.23716	1.16167	1.84296	0.0143563
AT4G18290	3.62921	3.16337	8.62866	6.52588	3.39629	7.57727	2.23104	1.15772	1.21901	0.0603928
AT3G05730	187.779	114.136	355.713	314.828	150.958	335.27	2.22095	1.15118	1.31471	0.0484491
AT1G65486	2.85204	1.93846	5.6605	4.957	2.39525	5.30875	2.21636	1.1482	1.43183	0.0369974
AT1G07180	4.7973	4.81269	11.4936	9.70739	4.805	10.6005	2.20613	1.14152	1.63951	0.0229347
AT5G40450	6.20343	4.87906	14.5366	9.56008	5.54125	12.0483	2.1743	1.12055	0.895015	0.127346
AT3G48360	14.8119	10.3249	28.5361	25.6249	12.5684	27.0805	2.15465	1.10745	1.4905	0.0323219
AT4G36850	14.3659	10.232	30.0877	22.6526	12.299	26.3701	2.14409	1.10037	1.09421	0.0804987
AT1G51400	108.764	97.7958	222.247	218.69	103.28	220.469	2.13468	1.09402	2.61774	0.00241134
AT5G24490	45.0994	40.6887	94.6252	88.3978	42.894	91.5115	2.13343	1.09318	2.21445	0.00610308
AT1G35112	3.06407	2.67806	7.43783	4.80321	2.87106	6.12052	2.1318	1.09207	0.870452	0.134756
AT1G77490	17.8197	13.6899	33.8801	33.2476	15.7548	33.5638	2.13039	1.09111	1.87027	0.0134813
AT1G20020	91.2555	75.1716	191.318	162.483	83.2136	176.901	2.12586	1.08805	1.5276	0.0296755
AT1G15980	22.0024	19.517	44.0244	44.1591	20.7597	44.0917	2.12391	1.08673	2.54775	0.00283303
AT4G37980	6.45078	5.60438	13.089	12.473	6.02758	12.781	2.12042	1.08435	2.22526	0.005953
AT2G24545	1.20066	1	1	3.65644	1.10033	2.32822	2.11592	1.08129	0.34301	0.453931
AT3G01060	14.5042	10.634	28.1784	24.8529	12.5691	26.5156	2.10959	1.07696	1.49656	0.0318744
AT5G02160	74.1886	51.6071	130.874	134.036	62.8978	132.455	2.10587	1.07442	1.58788	0.0258295
AT4G12830	4.17469	3.37024	8.87323	6.93965	3.77247	7.90644	2.09583	1.06752	1.23226	0.0585789
AT4G09010	65.8751	56.8509	136.549	120.652	61.363	128.6	2.09573	1.06745	1.74517	0.0179816
AT5G06690	6.14978	4.64934	11.6959	10.9279	5.39956	11.3119	2.09497	1.06693	1.70508	0.0197205
AT3G25770	13.3251	14.6694	30.7429	27.8292	13.9972	29.286	2.09227	1.06507	1.96521	0.0108341
AT3G56650	9.8225	10.3678	21.6775	20.5537	10.0952	21.1156	2.09165	1.06464	2.49535	0.00319634
AT5G53588	1.05237	1	3.27985	1	1.02618	2.13993	2.08532	1.06027	0.364823	0.431695
AT3G26740	51.6909	36.7849	90.5453	93.9004	44.2379	92.2229	2.0847	1.05984	1.61223	0.0244216
AT4G39710	15.6062	15.0674	34.8012	29.0704	15.3368	31.9358	2.0823	1.05818	1.54105	0.0287709
AT3G01440	7.33202	8.47011	16.8857	15.977	7.90107	16.4313	2.07964	1.05633	2.14218	0.00720816
AT3G18890	17.8376	16.9234	40.3796	31.9018	17.3805	36.1407	2.07938	1.05616	1.3191	0.0479624
AT3G54050	98.9159	86.6788	198.487	186.944	92.7974	192.715	2.07673	1.05432	2.15414	0.00701223
AT5G62360	2.69059	2.39703	5.18497	5.33037	2.54381	5.25767	2.06685	1.04743	2.44091	0.00362318
AT1G78995	4.31665	3.12681	7.79158	7.56857	3.72173	7.68007	2.06357	1.04515	1.64603	0.0225928
AT3G56980	1.61379	1.59733	3.75088	2.83623	1.60556	3.29356	2.05135	1.03657	1.17904	0.0662157
AT1G26210	2.63868	2.207	5.42098	4.5171	2.42284	4.96904	2.05091	1.03627	1.43675	0.0365804
AT1G66980	3.53376	2.22017	6.52484	5.2461	2.87697	5.88547	2.04572	1.03261	1.08819	0.0816219
AT5G14740	237.405	215.244	493.5	429.821	226.324	461.661	2.03982	1.02844	1.70092	0.0199105
AT2G36255	2.09082	1.93474	5.33907	2.86162	2.01278	4.10035	2.03716	1.02656	0.629656	0.234609
AT5G38410	2165.6	1868.7	4320.11	3891.63	2017.15	4105.87	2.03548	1.02537	1.81766	0.0152173
AT4G16880	2.42218	3.79564	6.81385	5.76778	3.10891	6.29081	2.02348	1.01684	1.17811	0.0663579
AT5G21430	11.6427	13.3532	28.4331	22.0933	12.498	25.2632	2.02138	1.01534	1.22013	0.0602378
AT5G58260	18.471	16.3606	38.4383	31.9441	17.4158	35.1912	2.02065	1.01482	1.4563	0.0349702
AT3G25880	1	1	2.3523	1.68584	1	2.01907	2.01907	1.01369	1.03456	0.0923515
AT1G65390	4.47575	3.66038	6.6269	9.79598	4.06806	8.21144	2.01851	1.01329	0.89648	0.126917
AT1G08540	24.5436	23.0047	54.2935	41.566	23.7742	47.9297	2.01604	1.01153	1.19546	0.0637595
AT5G02760	25.2516	19.8284	52.7385	37.8654	22.54	45.3019	2.00985	1.00709	0.988655	0.102647
AT4G17090	4.19713	3.67471	7.54478	8.2636	3.93592	7.90419	2.00822	1.00592	1.90991	0.0123051
AT1G71030	3.02159	2.16838	5.09071	5.32334	2.59498	5.20703	2.00657	1.00473	1.56097	0.027481
AT1G03130	173.131	145.081	331.243	306.893	159.106	319.068	2.00538	1.00388	1.87896	0.013214
AT4G16990	12.4688	8.55994	22.7265	19.4303	10.5144	21.0784	2.00473	1.0034	1.26859	0.0538779
AT1G49130	1.63913	2.13223	3.89869	3.64154	1.88568	3.77012	1.99934	0.999522	1.67599	0.0210867
AT3G63140	81.3962	72.4812	163.009	144.621	76.9387	153.815	1.99919	0.999414	1.76419	0.0172113
AT3G19800	8.80157	6.60092	16.8157	13.8286	7.70125	15.3221	1.98956	0.992452	1.26392	0.0544601
AT3G47380	3.66934	2.47916	5.68155	6.54803	3.07425	6.11479	1.98903	0.992068	1.26831	0.0539128
AT5G27290	8.97555	6.58706	16.0949	14.8153	7.7813	15.4551	1.98618	0.989996	1.52599	0.0297856
AT4G37930	157.279	132.233	307.697	266.848	144.756	287.273	1.98453	0.988797	1.56678	0.0271155
AT5G25980	5.58269	4.55178	11.628	8.43803	5.06723	10.033	1.97997	0.985482	1.01076	0.0975518
AT1G09340	164.283	129.847	297.841	282.83	147.065	290.335	1.9742	0.981268	1.77582	0.0167565
AT4G12900	2.97411	3.72452	6.68067	6.5153	3.34931	6.59799	1.96995	0.97816	1.86328	0.0137
AT2G19572	1.32139	1.54621	3.48928	2.15613	1.4338	2.8227	1.96868	0.977231	0.753826	0.176268
AT1G32080	32.4892	27.4588	60.7536	56.9358	29.974	58.8447	1.96319	0.973201	1.92992	0.0117511
AT1G14150	16.0539	15.7965	30.2421	31.951	15.9252	31.0965	1.95267	0.965446	2.49105	0.0032281
AT1G13650	1.77305	1.41765	3.1498	3.07992	1.59535	3.11486	1.95246	0.965295	1.85669	0.0139093
AT1G75690	68.3365	69.5472	143.292	125.575	68.9419	134.434	1.94996	0.963445	1.74741	0.0178892
AT1G08550	8.96529	8.45973	19.3064	14.6366	8.71251	16.9715	1.94795	0.961957	1.14139	0.0722118
AT4G28080	27.4515	25.6941	59.326	44.181	26.5728	51.7535	1.94761	0.961707	1.09305	0.0807133
AT3G62820	3.61845	3.62688	6.14569	7.965	3.62267	7.05534	1.94756	0.961665	1.19655	0.0635992
AT5G51720	84.1101	75.4795	177.717	132.974	79.7948	155.346	1.94681	0.961115	1.09605	0.0801594
AT1G70820	7.38783	6.60142	13.2093	13.9907	6.99462	13.6	1.94435	0.959285	2.15683	0.00696894
AT1G06680	751.938	695.175	1444.12	1356.98	723.557	1400.55	1.93565	0.952814	2.23305	0.00584722
AT1G32060	143.617	125.847	277.073	244.43	134.732	260.752	1.93534	0.952587	1.67652	0.0210612
AT2G18328	3.42451	3.93567	5.51427	8.72248	3.68009	7.11837	1.93429	0.951806	0.773387	0.168505
AT1G53250	2.88453	3.7903	6.88631	6.0039	3.33742	6.44511	1.93117	0.949473	1.40906	0.0389885
AT3G47250	9.05069	7.1467	16.5232	14.7502	8.09869	15.6367	1.93077	0.949176	1.54496	0.0285126
AT4G38820	1	1	2.85371	1	1	1.92686	1.92686	0.946249	0.374019	0.42265
AT1G07135	5.27817	8.91092	7.15351	20.1667	7.09454	13.6601	1.92544	0.945186	0.362893	0.433617
AT4G03060	1.87248	1.61551	3.88738	2.82319	1.744	3.35528	1.9239	0.944037	1.00599	0.0986305
AT1G77760	178.786	159.073	332.846	317.02	168.929	324.933	1.92348	0.943722	2.18703	0.00650081
AT4G23290	2.43507	1.83274	4.26686	3.93919	2.1339	4.10303	1.92278	0.943193	1.53756	0.0290026
AT5G46330	3.33733	3.16346	6.5249	5.97014	3.2504	6.24752	1.92208	0.942669	2.03264	0.00927594
AT2G29360	11.7907	11.9113	25.2942	20.2518	11.851	22.773	1.92161	0.942312	1.30628	0.049399
AT5G64770	11.236	8.39579	20.2917	17.3061	9.81592	18.7989	1.91514	0.937453	1.31167	0.0487902
AT5G38430	1272.42	1131.71	2538.64	2048.99	1202.06	2293.82	1.90823	0.932238	1.29789	0.0503628
AT1G74670	23.0637	18.1857	39.6893	38.9063	20.6247	39.2978	1.90538	0.930076	1.76819	0.0170535
AT5G19220	34.376	27.4677	63.0251	54.7066	30.9218	58.8658	1.9037	0.928805	1.45033	0.0354544
AT4G05180	295.486	261.757	545.749	513.208	278.621	529.478	1.90035	0.926266	2.06482	0.00861346
AT3G62550	6.53847	4.5638	10.7957	10.2736	5.55113	10.5347	1.89775	0.92429	1.40315	0.0395226
AT2G34430	973.03	798.58	1582.64	1777.01	885.805	1679.83	1.89638	0.923251	1.58505	0.0259983
AT3G49260	9.85463	9.676	19.575	17.4326	9.76532	18.5038	1.89485	0.922081	1.82983	0.0147969
AT2G37030	1.47151	1	1.86477	2.8138	1.23575	2.33928	1.893	0.920675	0.762708	0.1727
AT3G48420	27.13	23.7082	50.6525	45.5431	25.4191	48.0978	1.89219	0.920059	1.74741	0.0178892
AT5G56100	7.78015	7.2495	13.4862	14.9399	7.51482	14.2131	1.89134	0.919408	1.88329	0.013083
AT1G19150	26.148	23.8476	50.1619	44.2906	24.9978	47.2262	1.88922	0.917789	1.70927	0.0195315
AT5G03940	34.7009	33.4728	69.4618	59.3028	34.0869	64.3823	1.88877	0.917448	1.56292	0.0273576
AT2G22990	25.4221	20.4334	45.7641	40.7177	22.9277	43.2409	1.88596	0.915303	1.53492	0.0291796
AT1G53800	10.2466	12.291	24.4554	18.0463	11.2688	21.2509	1.88581	0.915188	1.01206	0.0972616
AT3G50820	281.601	259.761	521.905	498.753	270.681	510.329	1.88535	0.914834	2.35847	0.00438055
AT5G57760	14.6533	8.67551	23.5418	20.435	11.6644	21.9884	1.88508	0.914629	1.03621	0.0920011
AT4G21445	4.8366	6.60825	12.3153	9.24198	5.72243	10.7786	1.88358	0.913476	0.982216	0.10418
AT3G54890	1010.18	864.199	1771.22	1753.69	937.19	1762.46	1.88058	0.911174	2.10556	0.00784215
AT5G16030	21.3834	21.7755	42.9937	38.07	21.5794	40.5318	1.87826	0.909399	1.78095	0.0165595
AT3G29430	1.18174	1	2.25197	1.84523	1.09087	2.0486	1.87794	0.909154	1.30045	0.0500665
AT3G55800	128.604	117.183	245.307	215.776	122.894	230.541	1.87594	0.907614	1.67879	0.0209514
AT4G29060	84.21	84.8523	166.332	150.536	84.5312	158.434	1.87427	0.906326	1.94892	0.011248
AT5G66570	995.469	894.37	1749.26	1784.57	944.919	1766.91	1.86991	0.902969	2.37509	0.00421613
AT1G74880	25.8489	22.1962	44.9503	44.8822	24.0225	44.9162	1.86975	0.902849	2.12166	0.00755685
AT5G26620	1	1	1	2.73906	1	1.86953	1.86953	0.902674	0.374019	0.42265
AT5G13730	5.25279	6.19007	10.5939	10.7773	5.72143	10.6856	1.86764	0.901219	2.03967	0.00912697
AT3G06335	1	1	2.55013	1.18115	1	1.86564	1.86564	0.899671	0.477023	0.333409
AT1G54820	4.79707	4.6255	8.31082	9.26373	4.71129	8.78728	1.86515	0.899295	1.85964	0.0138152
AT1G49975	20.9919	16.9475	33.9006	36.8492	18.9697	35.3749	1.86481	0.899029	1.64804	0.0224885
AT5G35480	1.48263	1	1.88117	2.74401	1.24131	2.31259	1.86302	0.897642	0.789044	0.162538
AT1G15730	17.4313	18.9268	36.4513	31.1725	18.1791	33.8119	1.85993	0.895251	1.53105	0.029441
AT1G68790	6.02889	5.6288	12.6514	9.00472	5.82884	10.8281	1.85767	0.893492	0.949306	0.112381
AT1G04800	56.4687	49.8997	81.9825	115.432	53.1842	98.7071	1.85595	0.892157	0.934642	0.116241
AT4G14040	20.9186	18.823	38.384	35.3305	19.8708	36.8573	1.85485	0.891301	1.93272	0.0116756
AT1G22890	1.49224	1	2.50798	2.10904	1.24612	2.30851	1.85256	0.889522	1.10468	0.0785816
AT1G54780	79.4043	65.189	144.235	123.618	72.2966	133.927	1.85246	0.889442	1.41018	0.0388881
AT1G76080	77.1824	68.0983	132.411	136.612	72.6403	134.511	1.85174	0.888885	2.18854	0.00647827
AT4G37920	9.43108	8.18069	16.8273	15.7706	8.80589	16.2989	1.85091	0.888238	1.93094	0.0117236
AT5G53490	43.1127	36.1996	72.1612	74.4919	39.6562	73.3266	1.84906	0.886791	1.93803	0.0115337
AT5G66190	109.062	100.329	199.334	187.746	104.695	193.54	1.8486	0.886432	2.18029	0.00660248
AT2G33440	4.75516	3.80508	8.64259	7.17838	4.28012	7.91048	1.84819	0.886115	1.27394	0.053218
AT4G39195	1.05711	1	2.51599	1.27751	1.02856	1.89675	1.84409	0.882908	0.528216	0.296336
AT1G34245	6.97015	6.12796	11.3869	12.7421	6.54906	12.0645	1.84217	0.881409	1.69276	0.0202881
AT3G55330	38.893	32.6622	71.1449	60.6458	35.7776	65.8953	1.84181	0.881121	1.41216	0.0387113
AT3G14420	149.482	136.23	271.085	254.821	142.856	262.953	1.84069	0.880244	2.12249	0.00754233
AT5G64040	413.221	370.753	731.279	710.428	391.987	720.854	1.83897	0.878901	2.28953	0.00513412
AT1G08380	1000.74	843.373	1680.09	1707.05	922.056	1693.57	1.83673	0.877139	1.97727	0.0105373
AT4G39404	1.57356	1.48592	3.34909	2.27018	1.52974	2.80963	1.83667	0.877094	0.848435	0.141764
AT1G79040	1268.95	1201.89	2191.97	2326.16	1235.42	2259.07	1.82858	0.870727	2.27361	0.00532586
AT2G21330	160.168	148.053	292.128	270.889	154.11	281.509	1.82667	0.869215	2.04174	0.0090836
AT3G23700	22.5135	19.1467	40.8382	35.242	20.8301	38.0401	1.82621	0.868852	1.46638	0.0341678
AT1G12900	303.976	264.342	517.239	519.4	284.159	518.32	1.82405	0.867144	2.1483	0.00710719
AT5G46240	2.23952	1.99515	4.15539	3.5679	2.11734	3.86164	1.82382	0.866962	1.49904	0.031693
AT5G61270	3.43083	3.25468	6.97296	5.21946	3.34275	6.09621	1.82371	0.866876	1.05081	0.0889594
AT1G20830	5.42932	4.96968	9.46238	9.48916	5.1995	9.47577	1.82244	0.865871	2.53976	0.00288561
AT2G03310	2.20926	2.83473	4.07274	5.10943	2.522	4.59109	1.82042	0.86427	1.11932	0.0759764
AT1G65230	9.34177	9.27789	16.7663	17.1252	9.30983	16.9458	1.8202	0.864098	3.24474	0.000569188
AT1G68520	22.9207	22.1245	45.3153	36.6512	22.5226	40.9832	1.81965	0.86366	1.28991	0.0512965
AT1G21500	130.668	107.263	214.192	218.532	118.966	216.362	1.81869	0.862902	1.83545	0.0146065
AT3G15840	16.3793	16.0794	29.4913	29.5037	16.2293	29.4975	1.81754	0.86199	3.89323	0.000127869
AT5G06870	2.85586	2.94503	4.92398	5.61864	2.90044	5.27131	1.81742	0.86189	1.67517	0.0211267
AT5G38420	464.664	464.502	920.039	768.324	464.583	844.182	1.81707	0.861618	1.42376	0.0376916
AT1G66970	14.1447	10.0412	23.2936	20.5669	12.0929	21.9303	1.81348	0.858759	1.24136	0.0573643
AT3G09050	8.39378	6.08858	12.9318	13.3021	7.24118	13.1169	1.81144	0.857135	1.42854	0.0372789
AT4G26630	29.1126	26.8642	59.2952	42.0371	27.9884	50.6661	1.81025	0.856193	0.91694	0.121076
AT2G21440	8.4096	7.05104	15.1692	12.751	7.73032	13.9601	1.80589	0.852709	1.33577	0.0461561
AT5G04140	74.3202	65.1077	134.597	117.162	69.714	125.879	1.80566	0.852523	1.53075	0.0294611
AT4G16870	4.415	3.96808	8.66639	6.45691	4.19154	7.56165	1.80402	0.851219	1.01766	0.0960148
AT1G18730	16.1002	13.9889	27.5923	26.6855	15.0446	27.1389	1.8039	0.851122	2.0504	0.00890435
AT1G20810	13.9961	14.3944	25.8814	25.3212	14.1952	25.6013	1.80351	0.85081	3.04256	0.000906648
AT1G05010	81.3897	62.4677	128.934	130.402	71.9287	129.668	1.80273	0.850181	1.58564	0.0259636
AT4G04570	2.80805	3.58087	5.43964	6.07512	3.19446	5.75738	1.8023	0.849842	1.44305	0.0360535
AT1G09415	6.89332	6.35826	12.647	11.2221	6.62579	11.9346	1.80123	0.848981	1.7003	0.0199389
AT5G13630	119.402	110.518	218.303	195.645	114.96	206.974	1.8004	0.848318	1.76844	0.0170435
AT4G38860	7.6891	7.25425	14.2545	12.6316	7.47168	13.443	1.7992	0.847355	1.71617	0.0192235
AT1G23130	9.75217	8.93086	14.3865	19.2246	9.34151	16.8056	1.79902	0.847214	1.03058	0.0932015
AT2G40085	2.90794	2.28468	4.84805	4.49328	2.59631	4.67066	1.79896	0.847167	1.54355	0.0286057
AT5G24420	1.25876	1	2.3499	1.70871	1.12938	2.0293	1.79683	0.845455	0.916119	0.121306
AT4G37925	10.18	9.83101	19.944	15.9325	10.0055	17.9382	1.79284	0.842246	1.23068	0.0587919
AT4G04840	28.7203	27.1865	50.1428	50.0445	27.9534	50.0936	1.79204	0.841604	2.91985	0.00120267
AT5G48490	26.3097	20.7478	45.6015	38.7077	23.5287	42.1546	1.79162	0.841266	1.2827	0.0521556
AT4G14540	12.6063	11.8848	23.7059	20.1191	12.2456	21.9125	1.78943	0.839498	1.46859	0.0339944
AT3G01370	11.8857	9.49169	20.8791	17.3674	10.6887	19.1232	1.78911	0.839238	1.23651	0.0580084
AT4G39970	21.7001	22.7586	39.5054	39.9104	22.2293	39.7079	1.78628	0.83696	2.97902	0.00104949
AT3G61470	1022.76	900.734	1690.32	1741.93	961.747	1716.12	1.78438	0.835423	2.11784	0.00762366
AT1G42970	296.945	263.799	509.353	489.677	280.372	499.515	1.78162	0.833187	2.11655	0.00764632
AT2G13360	150.691	125.434	257.728	234.216	138.062	245.972	1.7816	0.833176	1.60864	0.0246239
AT4G23800	16.9891	17.308	34.0116	27.013	17.1486	30.5123	1.77929	0.831303	1.20516	0.06235
AT1G63880	5.45872	4.70845	10.0425	8.0397	5.08359	9.04109	1.77849	0.83065	1.18125	0.0658789
AT5G35790	11.5814	9.46093	20.2107	17.1934	10.5212	18.702	1.77756	0.8299	1.32574	0.0472344
AT5G02940	9.51452	7.69227	17.1885	13.3614	8.60339	15.275	1.77546	0.828191	1.05638	0.0878244
AT4G37940	1.45098	1.99951	3.32043	2.80439	1.72524	3.06241	1.77506	0.827867	1.14895	0.0709652
AT1G11070	2.04233	1.51262	3.73985	2.56515	1.77747	3.1525	1.77358	0.826668	0.778806	0.166416
AT1G05385	7.8308	9.62568	14.7721	16.1603	8.72824	15.4662	1.77197	0.825356	1.56541	0.0272013
AT3G18390	33.5792	30.889	61.8982	52.3005	32.2341	57.0994	1.7714	0.824887	1.42132	0.0379038
AT3G21055	740.711	704.871	1268.88	1290.88	722.791	1279.88	1.77074	0.824356	2.84721	0.00142164
AT5G65609	1.58422	1.96919	2.78025	3.50918	1.7767	3.14472	1.76997	0.823728	1.09673	0.0800323
AT1G52270	4.28868	3.14668	6.77938	6.35944	3.71768	6.56941	1.76707	0.821363	1.37034	0.0426241
AT4G32190	5.44561	4.50173	9.41896	8.15142	4.97367	8.78519	1.76634	0.820762	1.39369	0.0403931
AT5G65730	5.97556	5.7069	10.5124	10.1225	5.84123	10.3174	1.76631	0.820738	2.55502	0.00278601
AT2G43920	3.5037	2.01056	4.61193	5.12351	2.75713	4.86772	1.7655	0.820078	0.935596	0.115985
AT2G25480	7.93619	6.97315	14.4708	11.8495	7.45467	13.1602	1.76536	0.819963	1.25965	0.0549983
AT1G15340	22.3206	23.6357	44.7457	36.3705	22.9781	40.5581	1.76507	0.819728	1.27152	0.0535154
AT4G23550	7.037	7.62612	12.9811	12.8871	7.33156	12.9341	1.76417	0.818992	2.54935	0.00282258
AT3G18010	3.52095	3.44149	6.26777	6.01442	3.48122	6.1411	1.76406	0.818902	2.60521	0.00248194
AT4G21190	7.51767	7.75345	15.4729	11.4635	7.63556	13.4682	1.76388	0.81875	0.996034	0.100917
AT2G41680	46.4144	45.6446	87.8094	74.4485	46.0295	81.1289	1.76254	0.817658	1.46247	0.0344768
AT5G52570	4.03021	3.99445	7.51515	6.62861	4.01233	7.07188	1.76254	0.817655	1.69071	0.0203841
AT4G16860	8.42613	7.00611	14.3618	12.828	7.71612	13.5949	1.76188	0.817118	1.52027	0.0301805
AT1G23310	143.818	127.033	248.103	229.041	135.426	238.572	1.76164	0.81692	1.82908	0.0148223
AT4G28750	729.604	622.604	1210.94	1171.05	676.104	1191	1.76156	0.816851	1.91815	0.0120739
AT2G46820	233.659	208.003	391.383	386.377	220.831	388.88	1.76099	0.816385	2.22225	0.00599441
AT3G10060	29.0044	26.4575	51.2075	46.4512	27.7309	48.8294	1.76083	0.816252	1.79701	0.0159585
AT2G35370	118.435	115.987	216.258	196.46	117.211	206.359	1.76057	0.816046	1.91052	0.0122881
AT5G03050	3.24741	2.37768	4.6747	5.22665	2.81254	4.95067	1.76021	0.81575	1.27231	0.0534182
AT1G15940	2.9329	3.5212	6.34029	5.01979	3.22705	5.68004	1.76013	0.815685	1.11384	0.0769408
AT1G55480	28.983	33.4988	59.7712	50.1817	31.2409	54.9765	1.75976	0.815379	1.33337	0.0464121
AT1G75460	7.07807	6.35321	11.2294	12.403	6.71564	11.8162	1.7595	0.815166	1.74963	0.0177982
AT5G01530	1096.18	962.629	1809.4	1803.22	1029.4	1806.31	1.75472	0.811237	2.13536	0.00732224
AT4G29780	6.08593	8.82803	4.57857	21.5596	7.45698	13.0691	1.7526	0.809494	0.235796	0.581038
AT3G16250	23.4978	20.2442	38.6694	37.945	21.871	38.3072	1.75151	0.808598	1.99457	0.0101257
AT5G28010	1.56906	2.00637	3.25187	3.00792	1.78771	3.1299	1.75078	0.807998	1.48041	0.0330817
AT1G76450	24.796	24.9576	45.4724	41.5495	24.8768	43.5109	1.74906	0.806576	1.96189	0.0109173
AT1G67090	5720.49	5171.24	9781.79	9267.68	5445.87	9524.73	1.74898	0.806518	2.07584	0.00839772
AT5G05250	5.50986	5.33514	5.41352	13.5433	5.4225	9.47841	1.74798	0.805686	0.373055	0.42359
AT3G09210	34.3998	32.9372	60.105	57.5254	33.6685	58.8152	1.74689	0.804789	2.46112	0.00345841
AT5G04230	6.84462	7.04124	12.4979	11.7409	6.94293	12.1194	1.74557	0.803702	2.24724	0.00565923
AT3G26650	291.323	261.791	494.881	470.052	276.557	482.467	1.74454	0.802851	2.0623	0.00866366
AT1G25250	2.00304	1.63327	3.20732	3.12984	1.81816	3.16858	1.74274	0.801359	1.721	0.0190108
AT4G13575	4.50834	5.39466	10.3381	6.92019	4.9515	8.62912	1.74273	0.801348	0.762833	0.17265
AT4G19395	1.28665	1.23278	2.6962	1.6911	1.25972	2.19365	1.74139	0.800236	0.689022	0.204634
AT5G11242	1	2.5958	2.87827	3.37847	1.7979	3.12837	1.74001	0.799099	0.597633	0.252561
AT1G73600	31.1813	21.6086	47.8005	44.0428	26.3949	45.9216	1.73979	0.798912	1.20154	0.0628727
AT1G31330	932.135	837.091	1625.39	1452.22	884.613	1538.8	1.73952	0.79869	1.65673	0.022043
AT2G34640	23.09	21.5684	39.6844	37.9974	22.3292	38.8409	1.73947	0.798649	2.32795	0.00469949
AT3G22142	3.07936	2.35951	4.82052	4.63842	2.71944	4.72947	1.73914	0.798371	1.48861	0.0324634
AT3G25690	11.8287	9.82536	20.3084	17.3496	10.827	18.829	1.73907	0.798319	1.33341	0.0464079
AT1G67740	287.238	277.923	509.738	471.91	282.581	490.824	1.73693	0.796543	2.06366	0.00863654
AT1G45248	1.96206	1.75899	3.55897	2.90396	1.86052	3.23147	1.73686	0.796482	1.24233	0.0572365
AT2G36145	49.0679	39.0399	80.5067	72.4074	44.0539	76.457	1.73553	0.795379	1.42759	0.0373602
AT1G07450	1.80096	1.45885	3.34952	2.307	1.62991	2.82826	1.73523	0.795125	0.794328	0.160573
AT4G36515	9.43221	8.56756	15.9305	15.2458	8.99988	15.5881	1.73204	0.792469	2.15905	0.00693344
AT5G36002	1	2.21213	1.97464	3.58616	1.60606	2.7804	1.73119	0.791765	0.438583	0.364264
AT3G58550	12.664	11.0428	25.826	15.1883	11.8534	20.5072	1.73007	0.790828	0.603786	0.249008
AT5G55660	18.7058	19.5353	37.6866	28.4453	19.1206	33.0659	1.72934	0.790221	1.02165	0.0951378
AT5G50315	2.02803	1.99094	4.05066	2.89603	2.00949	3.47335	1.72847	0.789499	0.897021	0.126759
AT2G26560	1.60791	1.36994	2.29682	2.84936	1.48892	2.57309	1.72816	0.789233	1.16054	0.0690969
AT1G45474	44.6074	42.0419	79.6881	69.8374	43.3247	74.7628	1.72564	0.787131	1.59821	0.0252223
AT3G26165	1.32341	1	1.69908	2.30199	1.16171	2.00054	1.72207	0.784141	0.873723	0.133745
AT5G18600	5.65228	5.10685	9.58866	8.93628	5.37957	9.26247	1.72179	0.783907	1.9289	0.0117787
AT1G78880	4.89653	1.52314	5.92748	5.12163	3.20983	5.52456	1.72113	0.78336	0.50361	0.31361
AT5G52900	4.18692	2.98102	6.04333	6.29052	3.58397	6.16693	1.7207	0.782992	1.28099	0.0523611
AT3G27050	9.58455	9.42019	15.8345	16.8648	9.50237	16.3497	1.72059	0.782903	2.24002	0.00575415
AT5G26000	43.1393	34.6797	61.9418	71.8806	38.9095	66.9112	1.71966	0.782125	1.29883	0.0502534
AT2G43550	16.8427	17.9258	30.5008	29.2669	17.3842	29.8839	1.71902	0.781587	2.368	0.00428549
AT4G17245	8.38414	7.96635	16.6928	11.4055	8.17525	14.0492	1.7185	0.78115	0.803697	0.157146
AT5G52100	11.2002	8.91522	18.8254	15.7264	10.0577	17.2759	1.71768	0.780457	1.19149	0.0643446
AT2G24692	1.05726	1.19489	1.89247	1.9754	1.12608	1.93393	1.71741	0.780233	2.01121	0.0097451
AT5G19190	18.3742	14.6098	32.4986	24.1289	16.492	28.3137	1.71682	0.779736	0.90873	0.123387
AT4G00750	3.49954	3.4809	6.43482	5.54424	3.49022	5.98953	1.71609	0.779123	1.51827	0.03032
AT1G67700	105.564	94.5473	169.495	173.775	100.056	171.635	1.71539	0.778536	2.17087	0.00674731
AT3G44950	1	1	2.12827	1.30158	1	1.71493	1.71493	0.778147	0.646204	0.225838
AT5G02120	60.313	50.3205	99.1183	90.5946	55.3168	94.8564	1.71479	0.778029	1.57686	0.0264937
AT1G51110	16.6062	11.3438	25.3102	22.5741	13.975	23.9422	1.71322	0.776711	1.10638	0.0782739
AT4G35250	39.6446	37.0059	70.6698	60.5646	38.3253	65.6172	1.71211	0.775779	1.45948	0.034715
AT5G35670	2.23892	2.12866	4.46501	3.01221	2.18379	3.73861	1.71198	0.775669	0.778867	0.166392
AT1G21830	5.61034	5.5811	10.8131	8.34487	5.59572	9.579	1.71184	0.77555	1.07533	0.0840766
AT3G27925	17.3559	16.0564	28.9708	28.1706	16.7061	28.5707	1.71019	0.77416	2.38609	0.00411068
AT5G43440	6.95698	4.55811	10.3324	9.34049	5.75755	9.83644	1.70844	0.772682	1.05511	0.0880823
AT1G34000	32.9995	31.4161	54.7551	55.2576	32.2078	55.0063	1.70786	0.772188	2.87793	0.00132457
AT2G32100	3.11139	3.09086	5.44492	5.146	3.10112	5.29546	1.70759	0.771965	2.33451	0.00462903
AT1G72610	279.429	267.699	485.916	447.436	273.564	466.676	1.70591	0.770542	1.97162	0.0106753
AT1G68010	65.5215	59.268	110.256	102.594	62.3948	106.425	1.70568	0.770343	1.90729	0.0123796
AT1G32470	185.225	159.118	301.914	284.204	172.171	293.059	1.70213	0.767344	1.77982	0.0166027
AT1G20390	14.1224	12.1217	25.4768	19.1768	13.122	22.3268	1.70148	0.766786	0.965113	0.108364
AT5G57040	16.1935	15.7736	27.771	26.5998	15.9836	27.1854	1.70083	0.766243	2.51287	0.00306997
AT1G30380	963.096	853.421	1557.49	1531.96	908.259	1544.72	1.70075	0.766173	2.11153	0.00773512
AT1G32550	22.7653	22.8664	40.8454	36.7547	22.8158	38.8001	1.70057	0.766022	1.79611	0.0159916
AT2G46910	13.7477	11.901	22.5696	21.0271	12.8244	21.7983	1.69976	0.765332	1.75689	0.0175028
AT1G65260	37.8322	35.5191	66.4961	58.1196	36.6756	62.3078	1.69889	0.764591	1.55983	0.0275532
AT5G23010	24.2061	24.0376	46.4751	35.4661	24.1219	40.9706	1.69848	0.764248	1.03514	0.0922281
AT3G47070	101.866	89.3582	167.222	157.392	95.6121	162.307	1.69756	0.763462	1.85615	0.0139268
AT2G31150	8.98189	7.26787	15.5408	12.0428	8.12488	13.7918	1.69747	0.76339	0.997341	0.100614
AT1G68190	4.53354	4.72554	8.8115	6.90224	4.62954	7.85687	1.69712	0.763086	1.10702	0.0781586
AT2G20020	11.5353	12.4829	20.312	20.4441	12.0091	20.3781	1.69688	0.762883	2.4879	0.00325161
AT3G24140	3.29877	2.68936	6.26237	3.89402	2.99406	5.0782	1.69609	0.762212	0.637499	0.23041
AT1G50732	7.32872	7.83956	13.8278	11.8784	7.58414	12.8531	1.69473	0.761054	1.45992	0.0346803
AT1G73655	24.7986	25.1618	44.5993	40.067	24.9802	42.3332	1.69467	0.761003	1.7764	0.0167339
AT4G13495	40.0397	33.6465	75.3788	49.4071	36.8431	62.393	1.69348	0.759989	0.707191	0.19625
AT3G61870	49.4508	44.2057	82.0308	76.4476	46.8282	79.2392	1.69213	0.758836	1.86391	0.0136801
AT4G02770	660.157	650.106	1116.36	1100.6	655.131	1108.48	1.692	0.758727	3.37189	0.000424729
AT1G50450	17.1204	13.4972	27.6234	24.1454	15.3088	25.8844	1.69082	0.757721	1.28382	0.0520212
AT5G57345	41.5693	37.3772	65.2408	68.2186	39.4732	66.7297	1.6905	0.757454	2.05648	0.0087806
AT5G07842	3.90805	4.23011	6.60706	7.13426	4.06908	6.87066	1.6885	0.755745	1.92302	0.0119394
AT1G68870	3.01984	2.84245	5.72482	4.15571	2.93115	4.94026	1.68544	0.753123	0.899906	0.12592
AT1G01183	1	1.30042	1	2.87662	1.15021	1.93831	1.68518	0.752905	0.30616	0.494128
AT3G19030	39.0274	40.3749	68.3014	65.4088	39.7012	66.8551	1.68396	0.751857	2.4641	0.00343475
AT2G43650	11.6167	12.0212	21.5447	18.2312	11.8189	19.888	1.68272	0.750794	1.39556	0.0402198
AT2G20260	256.79	220.602	400.181	403.081	238.696	401.631	1.68261	0.750697	1.91419	0.0121847
AT1G48267	1	1	1.25491	2.11004	1	1.68247	1.68247	0.750583	0.599436	0.251515
AT5G64395	3.288	2.8493	4.72677	5.59624	3.06865	5.16151	1.68201	0.750188	1.30016	0.0501008
AT4G04040	12.5276	9.58853	18.9124	18.2519	11.058	18.5821	1.68042	0.74882	1.42235	0.0378135
AT2G41560	21.9089	19.7633	37.4804	32.5462	20.8361	35.0133	1.68041	0.748816	1.46631	0.0341734
AT2G42220	171.448	154.171	295.005	252.162	162.81	273.584	1.68039	0.748797	1.38899	0.0408329
AT3G16140	299.382	270.249	505.811	450.9	284.815	478.355	1.67953	0.748056	1.60498	0.0248323
AT4G09650	259.534	245.682	441.349	407.121	252.608	424.235	1.67942	0.747963	1.94407	0.0113745
AT1G77765	2.05638	3.07798	4.91754	3.70445	2.56718	4.31099	1.67927	0.747835	0.798841	0.158913
AT4G10340	1262.37	1076.26	1894.07	2031.93	1169.31	1963	1.67876	0.747396	1.68545	0.0206325
AT2G03420	24.3407	24.2264	47.5159	33.9966	24.2836	40.7562	1.67835	0.74704	0.869341	0.135101
AT5G22800	17.2086	14.9635	28.2399	25.6852	16.086	26.9626	1.67615	0.745148	1.62742	0.0235818
AT5G23120	56.379	51.2797	89.3301	91.0982	53.8293	90.2141	1.67593	0.744961	2.26313	0.00545592
AT2G43560	48.6237	42.7174	82.5781	70.364	45.6706	76.4711	1.67441	0.743649	1.34447	0.0452404
AT2G30570	619.769	522.002	958.674	952.216	570.885	955.445	1.67362	0.742972	1.80013	0.015844
AT3G47470	1313.13	1132.85	2054.02	2039.07	1222.99	2046.54	1.6734	0.74278	1.92634	0.0118483
AT3G05900	12.9702	13.9657	25.1381	19.934	13.468	22.5361	1.67331	0.742703	1.12047	0.0757764
AT1G61520	703.833	645.533	1131.59	1126.22	674.683	1128.91	1.67324	0.742647	2.38429	0.00412774
AT5G60530	14.1859	15.1952	27.9761	21.1629	14.6906	24.5695	1.67247	0.741978	0.986855	0.103073
AT4G01310	203.579	198.576	353.825	318.42	201.077	336.122	1.67161	0.741235	1.76754	0.0170791
AT5G09461	1.49429	3.48898	4.18946	4.13669	2.49163	4.16307	1.67082	0.740556	0.627344	0.235861
AT1G20690	1	1.05589	1.04814	2.38341	1.02794	1.71577	1.66913	0.739098	0.385611	0.411519
AT5G61590	25.9937	21.1052	41.3932	37.2207	23.5495	39.307	1.66912	0.739091	1.40712	0.0391633
AT1G66910	1.63068	1.69876	3.32629	2.22812	1.66472	2.7772	1.66827	0.738356	0.743482	0.180517
AT4G15545	58.1636	46.954	96.4028	78.8913	52.5588	87.647	1.6676	0.737773	1.10963	0.077691
AT1G25550	19.054	19.4746	33.7029	30.4474	19.2643	32.0751	1.665	0.735526	1.79532	0.0160205
AT3G17170	42.5825	43.2062	73.2741	69.5338	42.8944	71.404	1.66465	0.735216	2.35719	0.00439352
AT5G60880	2.91196	3.51459	5.38926	5.30299	3.21328	5.34613	1.66376	0.734448	1.7041	0.0197652
AT1G03410	3.12089	8.75862	6.41581	13.3391	5.93975	9.87744	1.66294	0.733735	0.327176	0.470786
AT4G21280	592.083	546.688	974.297	919.219	569.386	946.758	1.66277	0.73359	2.0543	0.00882479
AT4G12800	854.418	768.207	1381.02	1316.98	811.313	1349	1.66274	0.733563	2.00759	0.00982675
AT3G01550	2.75311	2.15445	4.23624	3.92185	2.45378	4.07904	1.66235	0.733225	1.3909	0.0406536
AT4G37820	6.8764	5.21248	10.6978	9.38833	6.04444	10.043	1.66153	0.732516	1.19725	0.0634959
AT3G62510	1.34753	2.08168	2.99538	2.70146	1.7146	2.84842	1.66127	0.732289	0.98657	0.103141
AT3G21870	3.73022	2.17158	4.85873	4.94375	2.9509	4.90124	1.66093	0.731992	0.887045	0.129704
AT5G52552	6.87221	3.48395	8.61626	8.57365	5.17808	8.59496	1.65987	0.731074	0.741734	0.181245
AT5G66520	3.25703	3.23161	4.88573	5.87719	3.24432	5.38146	1.65873	0.73008	1.30234	0.0498492
AT1G33811	7.93823	7.40562	11.0687	14.3796	7.67193	12.7242	1.65853	0.729909	1.02342	0.09475
AT2G40880	11.6507	9.18678	18.439	16.1029	10.4187	17.2709	1.65768	0.729169	1.24988	0.0562501
AT5G06290	74.6426	65.5342	123.295	108.965	70.0884	116.13	1.65691	0.728495	1.48997	0.0323612
AT5G62840	7.34212	5.68537	12.4954	9.08529	6.51374	10.7904	1.65655	0.728184	0.81613	0.152711
AT1G68590	122.573	115.765	205.846	188.943	119.169	197.395	1.65642	0.728069	1.87629	0.0132957
AT1G16260	2.38817	1.87992	3.88011	3.1888	2.13405	3.53446	1.65622	0.727895	1.08398	0.0824169
AT1G49870	2.09744	2.03784	4.01714	2.82979	2.06764	3.42346	1.65573	0.727471	0.823605	0.150105
AT2G01590	13.2464	13.1688	23.1741	20.5257	13.2076	21.8499	1.65434	0.726259	1.64394	0.0227015
AT3G15520	19.5175	16.2382	32.3501	26.7846	17.8779	29.5674	1.65385	0.725831	1.16378	0.0685834
AT1G52230	395.717	344.172	629.545	593.132	369.945	611.338	1.65251	0.724661	1.77828	0.0166616
AT1G55370	9.76041	9.70671	17.1729	14.9646	9.73356	16.0687	1.65086	0.723217	1.53646	0.0290761
AT4G13493	7.30132	3.56477	10.1114	7.82597	5.43304	8.96868	1.65077	0.723136	0.605913	0.247792
AT1G74250	9.48771	8.63451	17.0779	12.8347	9.06111	14.9563	1.6506	0.722991	0.94895	0.112474
AT3G50240	3.77008	3.02253	5.96983	5.227	3.3963	5.59841	1.64838	0.721052	1.27765	0.052766
AT1G28840	1.52352	1	3.15296	1	1.26176	2.07648	1.6457	0.718704	0.268703	0.538638
AT2G13970	3.81739	3.47261	7.00501	4.98077	3.645	5.99289	1.64414	0.717334	0.825378	0.149493
AT2G26570	7.37678	8.45396	13.5325	12.4688	7.91537	13.0006	1.64245	0.715851	1.66865	0.0214459
AT5G09460	1.11547	2.97436	3.29937	3.41569	2.04492	3.35753	1.64189	0.715356	0.531539	0.294077
AT1G20340	1071.18	936.911	1616.8	1679.7	1004.04	1648.25	1.64161	0.71511	1.88652	0.0129862
AT2G41940	7.92351	8.08063	15.0768	11.1939	8.00207	13.1354	1.6415	0.715013	0.92677	0.118367
AT5G62330	4.41329	5.24719	7.80788	8.04321	4.83024	7.92555	1.64082	0.714414	1.7205	0.0190328
AT5G44600	7.07323	5.68806	11.7882	9.14875	6.38064	10.4685	1.64066	0.714275	0.953917	0.111194
AT3G49601	14.1957	12.9156	23.13	21.3487	13.5557	22.2393	1.64059	0.714218	1.80741	0.0155807
AT5G62430	2.58301	4.26302	5.56277	5.66499	3.42301	5.61388	1.64004	0.713732	0.9162	0.121283
AT5G16780	9.35948	9.10368	15.3327	14.9426	9.23158	15.1376	1.63977	0.713491	2.8081	0.00155559
AT1G05190	209.106	206.046	340.648	340.008	207.576	340.328	1.63954	0.713289	3.85827	0.00013859
AT5G65010	70.6068	62.8393	115.422	103.205	66.7231	109.313	1.63832	0.712213	1.55767	0.0276903
AT5G55220	49.3361	48.3407	85.3434	74.631	48.8384	79.9872	1.63779	0.711754	1.54435	0.0285528
AT3G23070	12.7514	12.8969	21.5896	20.4059	12.8242	20.9978	1.63736	0.71137	2.27738	0.00527979
AT2G05100	704.919	612.202	1023.95	1132.51	658.56	1078.23	1.63725	0.711278	1.55704	0.0277309
AT1G67180	1.93725	2.18162	3.85545	2.88668	2.05944	3.37106	1.63689	0.710954	0.922302	0.119591
AT4G23300	4.51324	3.44019	7.382	5.62926	3.97671	6.50563	1.63593	0.710112	0.876295	0.132955
AT3G12780	231.946	216.997	358.535	374.945	224.471	366.74	1.63379	0.708226	2.21959	0.00603128
AT5G14565	6.38866	5.64637	10.6214	9.03918	6.01752	9.83028	1.63361	0.708065	1.31229	0.0487203
AT4G21210	33.36	26.7518	51.7352	46.4452	30.0559	49.0902	1.6333	0.707787	1.33674	0.0460529
AT1G52510	19.4252	16.4157	28.9296	29.5848	17.9204	29.2572	1.63261	0.707184	1.74575	0.0179576
AT5G08070	1.6261	1.42905	3.07492	1.91247	1.52758	2.49369	1.63245	0.707038	0.61454	0.242918
AT2G32180	23.023	19.7594	33.0235	36.8061	21.3912	34.9148	1.6322	0.70682	1.48857	0.032466
AT3G10520	37.5473	36.0832	59.5147	60.6532	36.8153	60.0839	1.63204	0.706675	2.80013	0.00158443
AT2G11271	1	1.89663	3.72626	1	1.44832	2.36313	1.63164	0.706324	0.22986	0.589033
AT2G10557	1	1	2.02273	1.23923	1	1.63098	1.63098	0.70574	0.604585	0.248551
AT5G64840	13.2064	13.4037	23.1046	20.2692	13.3051	21.6869	1.62997	0.704849	1.55966	0.0275639
AT5G64342	6.417	10.2683	16.6313	10.5499	8.34266	13.5906	1.62905	0.704033	0.549486	0.282172
AT5G17660	6.08137	5.15159	9.65993	8.6349	5.61648	9.14742	1.62867	0.703698	1.43981	0.0363238
AT4G04350	10.5137	10.8246	20.7645	13.9414	10.6691	17.3529	1.62646	0.701736	0.722474	0.189464
AT2G26340	21.1468	18.5605	33.0612	31.5152	19.8537	32.2882	1.62631	0.701603	1.84272	0.0143641
AT1G64680	27.858	25.6169	45.6872	41.2591	26.7374	43.4731	1.62593	0.701264	1.67192	0.0212855
AT4G01050	90.1997	90.3385	159.792	133.735	90.2691	146.763	1.62584	0.701189	1.30726	0.0492873
AT1G16510	3.08861	2.17677	3.44146	5.11744	2.63269	4.27945	1.62551	0.70089	0.645016	0.226456
AT4G39040	36.4269	38.8702	64.3255	58.0563	37.6486	61.1909	1.62532	0.700721	1.70298	0.019816
AT2G43520	1.76548	2.04058	2.54803	3.63586	1.90303	3.09195	1.62475	0.700219	0.774138	0.168214
AT4G13770	23.3534	21.7019	41.6586	31.5397	22.5277	36.5992	1.62463	0.700114	0.954493	0.111047
AT5G28330	2.57858	2.2769	4.04185	3.84375	2.42774	3.9428	1.62406	0.699608	1.85725	0.0138917
AT5G45680	33.9971	31.7844	54.2173	52.6143	32.8907	53.4158	1.62404	0.699586	2.35644	0.00440109
AT5G10945	1	1	2.24731	1	1	1.62366	1.62366	0.699247	0.374019	0.42265
AT2G44200	6.02203	5.74189	10.131	8.96625	5.88196	9.54862	1.62337	0.698995	1.59069	0.025663
AT4G25270	2.53745	2.18926	3.96267	3.70711	2.36335	3.83489	1.62265	0.69835	1.68058	0.0208653
AT4G34410	1.34215	1.91095	1.03122	4.24384	1.62655	2.63753	1.62155	0.697374	0.222846	0.598624
AT2G07757	5.12774	4.30949	11.3841	3.91863	4.71861	7.65136	1.62153	0.697353	0.286874	0.516567
AT3G22210	16.7154	14.8887	24.4619	26.7504	15.8021	25.6061	1.62043	0.696376	1.66591	0.0215821
AT5G16375	1	1	2.2401	1	1	1.62005	1.62005	0.69604	0.374019	0.42265
AT2G37450	9.61265	9.92477	16.2823	15.3617	9.76871	15.822	1.61966	0.695693	2.19488	0.00638445
AT1G10360	8.32745	6.11014	14.0437	9.33231	7.21879	11.688	1.6191	0.695196	0.641702	0.228191
AT1G55450	9.59998	10.0134	13.8733	17.8808	9.80667	15.8771	1.61901	0.695111	1.02353	0.0947273
AT3G11090	10.0008	6.17048	13.3471	12.833	8.08563	13.09	1.61893	0.695037	0.912471	0.122329
AT1G55670	742.408	676.734	1197.05	1100.37	709.571	1148.71	1.61889	0.695002	1.76318	0.0172514
AT5G04200	7.12716	8.16504	12.5081	12.2386	7.6461	12.3733	1.61826	0.69444	1.89891	0.0126208
AT1G54520	18.9746	17.0967	30.8037	27.535	18.0357	29.1693	1.61731	0.693599	1.56092	0.0274843
AT2G07042	2.09073	1.65206	2.39528	3.65645	1.8714	3.02587	1.6169	0.693234	0.64605	0.225918
AT3G53470	13.067	10.2374	16.07	21.6017	11.6522	18.8359	1.61651	0.692885	0.832973	0.146902
AT4G32320	9.54783	8.65447	16.7919	12.6261	9.10115	14.709	1.61617	0.692576	0.924183	0.119074
AT2G05070	659.9	597.906	1004.85	1027.56	628.903	1016.2	1.61583	0.69228	2.14348	0.00718656
AT5G59610	5.76639	6.43386	9.14442	10.5656	6.10013	9.85502	1.61554	0.692019	1.38678	0.0410415
AT1G73870	2.59596	1.86809	3.6488	3.56028	2.23203	3.60454	1.61492	0.691462	1.1903	0.0645214
AT2G04360	14.497	13.998	25.0779	20.9377	14.2475	23.0078	1.61487	0.691414	1.28191	0.0522499
AT3G08940	474.227	424.711	737.97	713.577	449.469	725.774	1.61474	0.691298	2.00742	0.00983068
AT1G68840	17.9553	16.8828	24.6978	31.5506	17.419	28.1242	1.61457	0.691146	1.04156	0.090874
AT1G49970	32.5368	28.1633	52.538	45.421	30.3501	48.9795	1.61382	0.69048	1.33007	0.0467663
AT4G39620	8.3322	8.5109	12.34	14.8385	8.42155	13.5892	1.61362	0.690304	1.26742	0.0540235
AT4G13500	26.8608	26.5623	46.9879	39.2075	26.7116	43.0977	1.61345	0.690148	1.28337	0.0520752
AT2G23360	2.88673	2.71967	4.16688	4.8742	2.8032	4.52054	1.61264	0.689421	1.377	0.0419763
AT4G09350	3.46249	3.63847	5.47068	5.97816	3.55048	5.72442	1.6123	0.689117	1.82622	0.0149205
AT2G36690	5.35956	3.93238	8.0298	6.94867	4.64597	7.48924	1.61199	0.68884	1.06313	0.08647
AT5G60030	11.1872	11.3386	18.8872	17.4149	11.2629	18.1511	1.61158	0.688478	1.94518	0.0113455
AT4G02530	63.4863	68.2567	115.15	97.0584	65.8715	106.104	1.61077	0.687753	1.30067	0.0500417
AT4G14560	2.87504	3.96177	5.33925	5.6709	3.4184	5.50508	1.61042	0.68744	1.17534	0.0667829
AT3G56040	10.1362	8.60504	16.2111	13.9572	9.37062	15.0842	1.60973	0.686818	1.28043	0.0524287
AT1G60200	14.3658	13.8288	24.655	20.7142	14.0973	22.6846	1.60914	0.686293	1.30393	0.0496678
AT5G38840	4.91445	4.39971	8.70701	6.27912	4.65708	7.49307	1.60896	0.686131	0.824941	0.149644
AT1G64770	21.2048	22.6099	35.6536	34.8318	21.9074	35.2427	1.60871	0.685907	2.43127	0.00370451
AT4G19530	2.77584	2.48338	4.71849	3.74198	2.62961	4.23024	1.60869	0.685889	1.05459	0.088189
AT2G44920	26.4284	22.277	38.243	40.0436	24.3527	39.1433	1.60735	0.684685	1.64571	0.0226097
AT4G19190	4.70212	5.59425	8.81462	7.73314	5.14819	8.27388	1.60714	0.684499	1.32982	0.0467928
AT2G35410	27.876	28.5307	48.9976	41.6528	28.2033	45.3252	1.60709	0.68445	1.36276	0.0433747
AT4G36090	4.5315	4.36347	7.94847	6.34437	4.44749	7.14642	1.60685	0.684231	1.10312	0.078864
AT5G23420	19.0278	19.0014	31.2781	29.8111	19.0146	30.5446	1.60637	0.683808	2.39536	0.00402384
AT5G52970	29.1408	28.4811	44.1771	48.376	28.8109	46.2765	1.60621	0.683663	1.83909	0.0144849
AT1G04620	6.51544	6.1683	11.1555	9.20281	6.34187	10.1792	1.60507	0.68264	1.21637	0.060762
AT4G25730	17.4418	15.9989	28.403	25.2644	16.7203	26.8337	1.60486	0.682444	1.5536	0.0279511
AT1G15820	1279.61	1161.37	1835.15	2082.09	1220.49	1958.62	1.60478	0.682375	1.48521	0.0327179
AT3G14760	7.32658	7.51446	11.4108	12.4053	7.42052	11.9081	1.60475	0.682348	1.9038	0.0124794
AT3G55500	3.07491	3.05532	3.87721	5.95925	3.06511	4.91823	1.60458	0.682198	0.663475	0.217032
AT5G44680	11.4006	9.68586	17.674	16.1525	10.5432	16.9133	1.60418	0.681838	1.51022	0.0308875
AT1G70620	12.9517	9.51667	20.0606	15.9737	11.2342	18.0172	1.60378	0.681479	0.898903	0.126211
AT1G11850	33.3897	24.2292	45.6872	46.6924	28.8095	46.1898	1.60329	0.681031	1.19622	0.0636477
AT5G13340	5.9202	3.79514	7.82854	7.74725	4.85767	7.7879	1.60322	0.68097	0.957371	0.110314
AT5G44520	10.7524	9.36502	17.3973	14.8383	10.0587	16.1178	1.60237	0.68021	1.27456	0.0531417
AT1G50910	2.67113	2.21225	4.56781	3.25688	2.44169	3.91235	1.60231	0.680155	0.773689	0.168388
AT3G48720	10.2328	9.28525	15.8677	15.4031	9.75904	15.6354	1.60215	0.680005	2.09873	0.00796654
AT1G09750	68.2425	64.771	111.452	101.647	66.5067	106.549	1.60208	0.679951	1.78379	0.0164518
AT1G26230	5.16118	5.26967	9.18237	7.52492	5.21543	8.35365	1.60172	0.679621	1.19762	0.063442
AT4G15690	1.60339	2.22583	2.93274	3.19501	1.91461	3.06388	1.60026	0.678306	1.11596	0.0765674
AT3G19480	8.40252	7.28981	13.0406	12.0673	7.84616	12.554	1.60001	0.678083	1.62388	0.0237749
AT2G28720	26.1402	22.7966	42.2976	35.982	24.4684	39.1398	1.5996	0.677715	1.26355	0.0545071
AT2G02450	4.62229	4.51014	7.87181	6.73617	4.56621	7.30399	1.59957	0.677687	1.38939	0.0407953
AT1G78915	6.09124	5.41091	9.86569	8.52568	5.75108	9.19568	1.59895	0.677125	1.35224	0.0444381
AT5G38520	27.771	30.1657	45.2807	47.3367	28.9684	46.3087	1.5986	0.676805	2.0872	0.00818083
AT1G79510	5.57614	6.61859	10.9465	8.54671	6.09736	9.7466	1.59849	0.676714	0.966267	0.108077
AT4G23890	19.5481	15.0254	28.3313	26.8884	17.2867	27.6098	1.59717	0.675518	1.30967	0.0490152
AT4G22890	41.5996	36.7748	59.8235	65.315	39.1872	62.5692	1.59668	0.675071	1.62756	0.0235745
AT1G01080	29.7659	27.9385	47.049	45.0551	28.8522	46.052	1.59613	0.674581	2.2129	0.00612491
AT1G14220	3.77923	3.3765	6.40899	5.01156	3.57787	5.71027	1.596	0.674461	1.00319	0.0992679
AT2G18800	5.89008	4.51746	8.32449	8.28454	5.20377	8.30451	1.59586	0.674338	1.34011	0.045697
AT2G20875	5.48944	5.89596	8.61925	9.54703	5.6927	9.08314	1.59558	0.674078	1.66566	0.0215943
AT3G61780	6.49425	6.69758	10.8413	10.2017	6.59591	10.5215	1.59515	0.673695	2.14107	0.00722654
AT4G03280	337.364	297.24	506.878	505.165	317.302	506.022	1.59476	0.673342	1.9534	0.0111326
AT4G18370	15.575	12.735	23.278	21.8684	14.155	22.5732	1.59472	0.6733	1.47259	0.0336829
AT2G21640	4.4388	5.57502	9.43202	6.53154	5.00691	7.98178	1.59415	0.67279	0.707023	0.196325
AT2G31040	19.5711	15.9017	31.2287	25.3202	17.7364	28.2744	1.59415	0.672784	1.02767	0.0938273
AT3G22150	5.66679	6.0743	10.0712	8.64372	5.87054	9.35749	1.59397	0.672627	1.37212	0.0424503
AT4G11393	1.24146	2.01331	2.84969	2.33719	1.62738	2.59344	1.59363	0.672317	0.763558	0.172362
AT4G11460	9.77064	9.0643	17.8464	12.1616	9.41747	15.004	1.59321	0.671938	0.720284	0.190421
AT2G41120	3.6004	3.28825	6.64589	4.3281	3.44433	5.487	1.59305	0.671795	0.652126	0.222779
AT4G24930	24.1885	18.8485	36.7236	31.8313	21.5185	34.2775	1.59293	0.67168	1.1429	0.071961
AT5G56850	7.81367	5.86229	11.7999	9.98321	6.83798	10.8916	1.5928	0.671568	1.03027	0.0932667
AT3G17070	2.75207	2.74294	4.38312	4.36708	2.7475	4.3751	1.59239	0.671194	4.49287	3.21459e-05
AT1G04110	4.75695	3.33008	6.0575	6.81911	4.04352	6.4383	1.59225	0.671069	1.01045	0.0976235
AT1G80380	43.6711	39.2402	65.8027	66.176	41.4557	65.9894	1.59181	0.670665	2.09084	0.00811254
AT1G09812	2.34056	1.6439	4.26689	2.07346	1.99223	3.17018	1.59127	0.670179	0.383374	0.413643
AT1G12610	1.22525	1.35615	1	3.10741	1.2907	2.05371	1.59116	0.670077	0.263654	0.544937
AT4G27800	31.4227	26.4396	48.3198	43.7399	28.9311	46.0299	1.59101	0.669947	1.4317	0.0370086
AT1G29920	3433.23	3005.2	5206.78	5033.71	3219.21	5120.24	1.59053	0.669505	1.8408	0.0144277
AT3G48745	1	1	2.17982	1	1	1.58991	1.58991	0.668946	0.374019	0.42265
AT5G16570	1.83277	1.9531	4.04859	1.9703	1.89293	3.00944	1.58983	0.668874	0.402651	0.395684
AT5G24800	5.4231	5.03726	8.60034	8.01894	5.23018	8.30964	1.58879	0.667926	1.89984	0.0125938
AT5G02540	3.16192	1.69295	3.78636	3.92652	2.42743	3.85644	1.58869	0.667838	0.715831	0.192384
AT1G29910	3621.46	3261.49	5451.66	5482.76	3441.47	5467.21	1.58862	0.667778	2.10461	0.00785937
AT5G10890	2.07044	1.49908	3.03996	2.63037	1.78476	2.83516	1.58854	0.667698	1.01723	0.0961102
AT4G01800	17.5808	18.2984	31.5131	25.4787	17.9396	28.4959	1.58844	0.66761	1.13198	0.0737938
AT5G20140	8.67222	8.40322	14.0986	12.9889	8.53772	13.5437	1.58634	0.665702	1.89418	0.0127592
AT3G55040	16.6714	12.8175	24.4045	22.3691	14.7444	23.3868	1.58615	0.665527	1.23586	0.0580956
AT3G04370	2.32201	2.44656	4.44884	3.11411	2.38429	3.78147	1.586	0.66539	0.763286	0.17247
AT1G14630	2.67413	1.74364	3.58317	3.42146	2.20888	3.50232	1.58556	0.664991	0.952934	0.111446
AT4G24700	1.9661	2.78932	3.30369	4.23587	2.37771	3.76978	1.58547	0.664907	0.810896	0.154562
AT5G54270	1267.8	1134.65	1873.83	1934.68	1201.22	1904.26	1.58526	0.664721	1.97196	0.010667
AT1G23400	14.086	14.6213	24.8361	20.6635	14.3537	22.7498	1.58495	0.664434	1.24101	0.0574105
AT3G06020	1.91263	1.77247	2.90548	2.93365	1.84255	2.91956	1.58452	0.664046	2.35889	0.00437635
AT2G05310	30.7918	34.2613	58.5994	44.4341	32.5266	51.5168	1.58384	0.663423	0.916443	0.121215
AT1G29930	7703.84	7059.34	11384.3	11995.3	7381.59	11689.8	1.58365	0.663252	1.98059	0.010457
AT3G26310	2.33852	1.89491	3.31251	3.39141	2.11671	3.35196	1.58357	0.66318	1.49909	0.0316894
AT1G52400	6.90166	6.51137	10.5059	10.7334	6.70652	10.6197	1.58348	0.663103	2.47954	0.00331479
AT2G21280	26.133	21.4774	40.1538	35.2299	23.8052	37.6918	1.58334	0.662974	1.26207	0.0546933
AT3G44890	190.424	172.072	291.743	282.168	181.248	286.956	1.58322	0.662863	2.02452	0.00945109
AT4G34830	17.0434	14.9204	28.4742	22.1221	15.9819	25.2981	1.58292	0.662591	0.964296	0.108568
AT5G35630	365.109	352.287	574.69	560.624	358.698	567.657	1.58255	0.66225	2.68454	0.00206758
AT1G76190	1.18791	1.04859	1.87841	1.66095	1.11825	1.76968	1.58254	0.662241	1.43039	0.0371198
AT2G34620	9.90963	9.0117	15.1203	14.8221	9.46067	14.9712	1.58247	0.662176	2.13728	0.00728995
AT3G48540	4.11953	3.61693	7.90728	4.33428	3.86823	6.12078	1.58232	0.662042	0.470882	0.338157
AT2G22795	15.6267	17.5054	27.8186	24.5893	16.566	26.2039	1.58179	0.661555	1.44887	0.035574
AT2G42690	12.5826	11.7159	20.8295	17.5843	12.1493	19.2069	1.58091	0.660755	1.28207	0.0522315
AT4G16630	8.2479	8.3216	13.7883	12.3992	8.28475	13.0937	1.58046	0.660348	1.69287	0.0202829
AT4G34320	1.60998	1.77286	3.04242	2.30332	1.69142	2.67287	1.58025	0.660152	0.913506	0.122038
AT3G01480	56.0604	50.0368	86.8676	80.7349	53.0486	83.8012	1.57971	0.659658	1.72171	0.0189797
AT4G25080	108.609	103.635	170.958	164.01	106.122	167.484	1.57822	0.6583	2.31758	0.004813
AT1G03630	55.7935	52.3177	84.3472	86.2555	54.0556	85.3013	1.57803	0.658125	2.39772	0.00400204
AT1G21270	2.49495	2.88396	3.91217	4.57181	2.68946	4.24199	1.57727	0.657428	1.25349	0.0557846
AT1G05560	7.24528	6.88468	11.5285	10.7556	7.06498	11.142	1.57708	0.657256	1.96803	0.010764
AT5G16180	5.40348	5.27547	9.65923	7.18205	5.33947	8.42064	1.57705	0.657232	0.882913	0.130945
AT4G32260	247.789	229.36	374.05	378.351	238.574	376.2	1.57687	0.657062	2.3285	0.00469354
AT1G76100	86.2715	90.6476	145.133	133.733	88.4596	139.433	1.57623	0.656481	1.85243	0.0140466
AT1G06460	16.3801	13.7215	24.3782	23.0664	15.0508	23.7223	1.57614	0.656399	1.55284	0.0280003
AT2G35660	3.50471	2.96188	5.33495	4.85361	3.2333	5.09428	1.57557	0.655873	1.44419	0.0359592
AT5G43750	38.6172	36.2996	60.7336	57.2942	37.4584	59.0139	1.57545	0.655766	2.03959	0.00912863
AT2G26500	192.264	187.615	310.923	287.154	189.94	299.039	1.57439	0.654792	1.91733	0.0120968
AT5G09443	3.62524	3.54834	4.97719	6.31493	3.58679	5.64606	1.57413	0.654551	1.03836	0.0915468
AT5G36790	37.6358	33.5071	58.8437	53.1249	35.5715	55.9843	1.57385	0.654302	1.54399	0.0285764
AT4G33500	7.56622	7.86057	12.7087	11.5683	7.71339	12.1385	1.57369	0.65415	1.76312	0.0172537
AT3G52380	98.4033	96.7366	153.541	153.542	97.5699	153.541	1.57365	0.654117	3.65441	0.000221608
AT3G43540	14.0977	12.7284	22.5927	19.6092	13.4131	21.1009	1.57316	0.653669	1.36972	0.0426857
AT1G61300	1.9276	1.73904	2.95899	2.80607	1.83332	2.88253	1.5723	0.652876	1.882	0.0131221
AT3G19850	2.62439	2.16992	4.02311	3.51467	2.39715	3.76889	1.57223	0.652817	1.24723	0.0565938
AT5G54600	197.374	191.119	314.703	295.97	194.247	305.336	1.5719	0.652509	2.10741	0.00780899
AT4G04640	197.805	185.23	299.299	302.574	191.518	300.936	1.57132	0.651981	2.45505	0.0035071
AT2G01990	4.41796	3.98765	8.39448	4.81338	4.2028	6.60393	1.57131	0.651972	0.502341	0.314528
AT3G59400	59.8898	53.8916	94.6372	84.1058	56.8907	89.3715	1.57093	0.651623	1.48031	0.0330898
AT3G16660	89.4446	71.202	134.847	117.423	80.3233	126.135	1.57034	0.651076	1.16655	0.0681483
AT1G30520	7.20456	7.58488	13.4041	9.81663	7.39472	11.6104	1.57009	0.650844	0.840306	0.144442
AT5G09975	1	1.19128	1.70043	1.74002	1.09564	1.72023	1.57006	0.650824	1.62726	0.0235905
AT3G62910	18.978	18.3271	30.0684	28.4988	18.6525	29.2836	1.56995	0.650722	2.19884	0.00632649
AT4G38970	738.863	700.817	1160.59	1098.77	719.84	1129.68	1.56935	0.650166	2.11056	0.00775239
AT1G08520	55.6847	52.0036	91.007	77.9418	53.8441	84.4744	1.56887	0.649725	1.33958	0.0457531
AT5G14110	2.02918	1.63215	3.07347	2.66794	1.83067	2.8707	1.56812	0.649036	1.17365	0.0670428
AT1G17220	43.7527	41.9976	71.9312	62.5316	42.8751	67.2314	1.56807	0.648993	1.43844	0.0364388
AT1G77580	3.80048	3.09408	5.71345	5.09559	3.44728	5.40452	1.56776	0.648707	1.2761	0.0529547
AT3G47560	7.37011	6.95962	12.567	9.8881	7.16487	11.2276	1.56703	0.648034	1.01967	0.0955712
AT4G37540	37.2874	31.2923	56.3006	51.1533	34.2899	53.7269	1.56685	0.647863	1.40984	0.0389192
AT5G39530	22.5523	19.8202	33.2065	33.1759	21.1863	33.1912	1.56664	0.647672	1.89608	0.0127035
AT3G15360	108.829	105.324	172.726	162.621	107.076	167.674	1.56593	0.647017	2.11357	0.00769891
AT5G45040	9.14101	10.7518	14.1571	16.991	9.94642	15.574	1.56579	0.646895	1.1272	0.0746102
AT5G02810	17.7736	16.024	28.8724	24.0474	16.8988	26.4599	1.56578	0.646886	1.18651	0.065086
AT5G02830	7.11189	7.57351	13.1068	9.87995	7.3427	11.4934	1.56528	0.646422	0.900464	0.125758
AT2G42600	52.3462	48.4355	81.0802	76.5789	50.3909	78.8296	1.56436	0.645575	1.96607	0.0108127
AT2G45850	5.67448	4.68211	8.28624	7.91464	5.1783	8.10044	1.56431	0.645523	1.50392	0.0313384
AT5G61000	6.50658	7.12922	12.1081	9.21693	6.8179	10.6625	1.5639	0.645147	0.915264	0.121545
AT5G40340	11.5127	11.8701	19.9716	16.5874	11.6914	18.2795	1.5635	0.644778	1.21685	0.060694
AT3G12345	64.3391	61.1483	93.8141	102.307	62.7437	98.0606	1.56288	0.644203	1.79315	0.0161011
AT1G08090	1.49145	1.18603	2.45663	1.72679	1.33874	2.09171	1.56245	0.643807	0.70486	0.197306
AT5G28450	2.64351	2.40085	5.02206	2.85862	2.52218	3.94034	1.56228	0.643649	0.491546	0.322444
AT1G62750	89.7356	89.3715	145.937	133.85	89.5536	139.893	1.56212	0.643504	1.85013	0.0141212
AT1G13820	15.9263	17.0595	27.1805	24.3414	16.4929	25.7609	1.56194	0.643337	1.58277	0.0261353
AT1G67230	14.9029	13.7016	24.2465	20.4104	14.3022	22.3284	1.56119	0.642644	1.24134	0.0573668
AT4G37409	1.29012	1.73482	2.44814	2.27418	1.51247	2.36116	1.56113	0.642588	1.14975	0.0708356
AT5G62940	4.04028	3.60485	6.12398	5.81016	3.82256	5.96707	1.56101	0.642482	1.81526	0.0153018
AT2G38720	3.12886	2.48586	5.08614	3.67779	2.80736	4.38196	1.56088	0.642364	0.747296	0.178939
AT4G31560	24.9021	19.8377	36.0084	33.8248	22.3699	34.9166	1.56087	0.642354	1.34617	0.045064
AT2G46250	3.38003	2.72159	4.18717	5.336	3.05081	4.76158	1.56076	0.642248	0.910846	0.122787
AT3G48500	20.3826	21.4776	36.8517	28.4514	20.9301	32.6515	1.56003	0.641572	0.960421	0.109542
AT1G13790	1.67508	1.87596	3.03649	2.50284	1.77552	2.76966	1.55991	0.641467	1.13481	0.0733149
AT1G16960	2.33366	2.18896	3.29519	3.75886	2.26131	3.52703	1.55973	0.641293	1.45716	0.0349009
AT1G77090	15.3265	15.3664	25.1781	22.6934	15.3465	23.9357	1.55969	0.641259	1.69268	0.0202917
AT2G37080	11.9073	11.5597	19.5042	17.0961	11.7335	18.3002	1.55966	0.641228	1.48615	0.0326478
AT2G34238	1.29956	1	2.13091	1.45553	1.14978	1.79322	1.55962	0.641196	0.650388	0.223672
AT5G21930	11.1662	9.13958	16.7463	14.8987	10.1529	15.8225	1.55842	0.640086	1.26909	0.0538153
AT1G50320	63.472	53.862	95.0622	87.7839	58.667	91.4231	1.55834	0.640009	1.4917	0.0322326
AT4G39160	5.16208	4.34067	7.95654	6.85165	4.75137	7.40409	1.55831	0.639978	1.21309	0.0612217
AT3G03190	6.00558	5.12908	9.15431	8.19576	5.56733	8.67503	1.5582	0.639884	1.38718	0.0410034
AT2G03150	7.63507	6.06496	11.7056	9.63669	6.85001	10.6711	1.55783	0.639536	1.0057	0.0986956
AT1G28370	1.73962	1.98131	1.45834	4.33753	1.86047	2.89794	1.55764	0.639361	0.261831	0.547229
AT5G14970	17.3882	17.217	27.526	26.3712	17.3026	26.9486	1.55749	0.63922	2.43872	0.0036415
AT3G05370	2.46146	2.62729	4.29366	3.63029	2.54438	3.96197	1.55715	0.638907	1.27133	0.0535384
AT5G38720	8.67689	8.91347	15.694	11.6958	8.79518	13.6949	1.55709	0.638853	0.872189	0.134218
AT3G48710	4.17502	5.06641	7.81603	6.56774	4.62072	7.19189	1.55644	0.638253	1.10444	0.0786248
AT5G09660	75.3508	68.88	116.658	107.807	72.1154	112.233	1.55629	0.638112	1.74072	0.0181669
AT4G01150	308.203	314.647	490.105	478.619	311.425	484.362	1.55531	0.6372	2.83958	0.00144684
AT4G28030	23.6378	23.1937	38.8569	33.9595	23.4157	36.4082	1.55486	0.636786	1.46856	0.0339971
AT2G34860	68.8105	62.0105	105.82	97.494	65.4105	101.657	1.55414	0.636115	1.67182	0.02129
AT3G23030	18.2563	16.0513	29.6417	23.6743	17.1538	26.658	1.55406	0.63604	1.01714	0.0961305
AT3G20865	1.63382	1.15331	2.36371	1.96735	1.39356	2.16553	1.55395	0.635943	0.881306	0.13143
AT3G27160	172.522	169.131	267.734	262.883	170.827	265.308	1.55308	0.635133	3.00893	0.000979656
AT1G66130	8.12623	8.13688	11.886	13.3694	8.13156	12.6277	1.55293	0.63499	1.58248	0.0261529
AT1G77122	11.5038	12.9986	18.9777	19.0429	12.2512	19.0103	1.55171	0.633859	1.91972	0.0120305
AT4G02920	26.0832	24.7336	41.7086	37.1359	25.4084	39.4223	1.55154	0.633703	1.55692	0.0277381
AT1G72640	18.588	14.3209	26.0145	25.0124	16.4544	25.5135	1.55055	0.632783	1.26887	0.0538428
AT3G63490	186.268	171.717	305.735	249.214	178.993	277.475	1.5502	0.632456	1.10953	0.0777079
AT5G06110	16.6056	18.225	28.5467	25.4387	17.4153	26.9927	1.54994	0.632213	1.49645	0.0318821
AT4G36570	4.0403	3.48223	5.95267	5.70655	3.76126	5.82961	1.54991	0.632182	1.67664	0.0210554
AT4G24120	5.89363	5.14163	9.35616	7.74541	5.51763	8.55079	1.54972	0.632008	1.11812	0.0761862
AT5G64380	6.33628	4.88215	8.32808	9.05207	5.60922	8.69007	1.54925	0.631569	1.20064	0.0630024
AT2G46662	1.52007	1.02289	2.93931	1	1.27148	1.96966	1.5491	0.631432	0.253611	0.557684
AT4G18240	9.60171	9.79335	16.5749	13.4591	9.69753	15.017	1.54854	0.630905	1.11711	0.0763637
AT1G58602	7.82037	6.903	13.2166	9.58232	7.36168	11.3995	1.54849	0.63086	0.785121	0.164013
AT3G48200	6.48231	5.81552	10.4118	8.62198	6.14891	9.51688	1.54773	0.630158	1.14361	0.0718444
AT5G46450	3.82841	3.96989	6.86466	5.19926	3.89915	6.03196	1.54699	0.629467	0.901997	0.125315
AT5G45190	8.42425	7.71322	13.6736	11.2863	8.06874	12.48	1.54671	0.6292	1.14694	0.0712947
AT2G35384	1	1	1	2.09247	1	1.54624	1.54624	0.628761	0.374019	0.42265
AT5G36700	39.323	35.4578	59.4314	56.1962	37.3904	57.8138	1.54622	0.628747	1.82715	0.0148886
AT2G46670	1.81236	1.37052	2.06078	2.86049	1.59144	2.46064	1.54617	0.628703	0.704623	0.197413
AT4G08310	7.16477	8.18895	14.2767	9.44657	7.67686	11.8616	1.54512	0.627715	0.634243	0.232144
AT1G64150	13.2355	12.7902	20.4634	19.7396	13.0129	20.1015	1.54474	0.627364	2.44688	0.00357371
AT3G27940	1.58253	1	2.39554	1.59327	1.29127	1.9944	1.54453	0.627171	0.534842	0.291849
AT5G48220	15.1439	13.751	23.8302	20.7879	14.4475	22.309	1.54415	0.626811	1.37236	0.0424267
AT3G12240	1.49818	2.07365	2.88434	2.6307	1.78592	2.75752	1.54403	0.626703	1.04233	0.0907132
AT5G61410	186.617	159.307	284.777	249.022	172.962	266.9	1.54311	0.625845	1.277	0.0528451
AT5G04320	5.73104	4.99814	9.82339	6.73161	5.36459	8.2775	1.54299	0.625727	0.681565	0.208178
AT5G17700	9.34688	8.35614	13.1663	14.1471	8.85151	13.6567	1.54287	0.625616	1.69035	0.0204011
AT2G04039	16.2237	16.3027	26.6551	23.5169	16.2632	25.086	1.5425	0.625271	1.51967	0.0302226
AT5G52440	41.1489	36.9612	60.3975	60.0366	39.0551	60.2171	1.54185	0.624663	2.01238	0.00971907
AT4G02110	2.71098	2.8668	4.97	3.62953	2.78889	4.29976	1.54175	0.624564	0.811035	0.154513
AT1G55490	175.726	179.631	286.824	261.044	177.678	273.934	1.54174	0.62456	1.74825	0.0178548
AT1G03680	105.208	101.711	173.301	145.664	103.46	159.482	1.54149	0.624327	1.24708	0.056614
AT5G67370	6.15952	5.77175	8.95514	9.43049	5.96563	9.19281	1.54096	0.623831	2.04998	0.00891283
AT1G47395	5.39891	5.31243	5.39245	11.1109	5.35567	8.2517	1.54074	0.623624	0.379058	0.417774
AT3G53650	31.9073	25.6843	39.1221	49.5814	28.7958	44.3517	1.54022	0.623133	0.903171	0.124977
AT4G16855	1	1	1.83572	1.24332	1	1.53952	1.53952	0.622483	0.677525	0.210124
AT4G13840	9.16199	7.82728	12.8607	13.281	8.49463	13.0709	1.53872	0.62173	1.64614	0.0225872
AT3G06778	3.48322	2.04906	4.24496	4.26222	2.76614	4.25359	1.53774	0.620808	0.760013	0.173775
AT2G40490	84.6207	85.3739	132.24	129.141	84.9973	130.691	1.53759	0.62067	2.91521	0.00121559
AT2G38040	40.2044	41.0035	65.5137	59.3325	40.604	62.4231	1.53737	0.62046	1.70344	0.0197952
AT2G26540	13.4576	12.3226	21.9311	17.6892	12.8901	19.8101	1.53685	0.619976	1.05734	0.0876321
AT1G75100	2.92082	2.49411	4.93484	3.38434	2.70747	4.15959	1.53634	0.619498	0.672281	0.212676
AT1G48350	274.407	253.026	398.239	411.837	263.716	405.038	1.53588	0.61907	2.10009	0.00794164
AT5G66470	26.6843	26.8334	44.1856	37.9188	26.7588	41.0522	1.53415	0.617444	1.34802	0.0448727
AT5G04490	13.0991	9.49011	19.243	15.4121	11.2946	17.3275	1.53414	0.617431	0.827076	0.14891
AT5G49910	80.3145	80.3668	132.352	114.114	80.3407	123.233	1.53388	0.617187	1.37313	0.0423515
AT1G60990	13.0018	11.4398	19.6254	17.8574	12.2208	18.7414	1.53357	0.61689	1.50583	0.0312009
AT1G75350	216.445	229.707	333.998	350.154	223.076	342.076	1.53345	0.616782	2.11777	0.00762491
AT2G32550	9.9437	8.12706	14.5317	13.1741	9.03538	13.8529	1.53318	0.616531	1.29085	0.0511862
AT4G17600	87.8372	79.9805	127.552	129.74	83.9088	128.646	1.53316	0.616511	2.08586	0.00820617
AT1G62630	2.36133	2.2276	3.81844	3.21655	2.29447	3.5175	1.53303	0.61639	1.23614	0.0580583
AT1G60510	1.58583	1.42997	2.66846	1.95481	1.5079	2.31164	1.53302	0.616374	0.799312	0.158741
AT1G80030	19.603	16.9781	29.1	26.962	18.2905	28.031	1.53254	0.615925	1.53914	0.0288973
AT5G47740	3.03218	3.91171	4.65149	5.98925	3.47195	5.32037	1.53239	0.615782	0.832012	0.147227
AT1G52870	6.55089	5.82881	9.59747	9.36927	6.18985	9.48337	1.53208	0.615495	1.88737	0.0129606
AT1G62780	45.6417	41.8081	68.8947	65.0818	43.7249	66.9883	1.53204	0.615453	1.87819	0.0132377
AT3G08885	1.08387	1.36348	2.45931	1.28917	1.22368	1.87424	1.53165	0.615085	0.406121	0.392535
AT3G57180	8.00821	7.53687	11.807	12.0007	7.77254	11.9039	1.53153	0.614972	2.42227	0.00378207
AT5G21222	7.03609	6.53864	10.958	9.83198	6.78736	10.395	1.53152	0.614967	1.55445	0.0278968
AT5G08420	21.3078	19.6648	35.5302	27.2164	20.4863	31.3733	1.53143	0.614879	0.906789	0.12394
AT1G47410	3.82934	3.15833	5.22443	5.46837	3.49384	5.3464	1.53024	0.613756	1.45364	0.0351851
AT5G47380	2.15036	1.94093	3.42736	2.83251	2.04565	3.12994	1.53005	0.613577	1.12402	0.0751589
AT1G17420	2.05917	1.97895	2.81738	3.36113	2.01906	3.08925	1.53005	0.613575	1.2214	0.0600618
AT3G20550	9.35772	10.0411	17.0434	12.6294	9.69939	14.8364	1.52962	0.613176	0.829357	0.14813
AT2G40960	7.17997	6.73544	11.3737	9.91053	6.9577	10.6421	1.52955	0.613106	1.39285	0.0404715
AT2G06520	1161.53	1051.55	1719.28	1665.23	1106.54	1692.25	1.52932	0.612889	1.96791	0.0107669
AT3G02730	85.0241	72.7588	121.937	119.312	78.8914	120.625	1.52899	0.612582	1.66062	0.0218465
AT4G15670	1.32749	1.54549	2.08219	2.31048	1.43649	2.19634	1.52896	0.61255	1.3921	0.0405414
AT4G17560	81.1464	78.0822	127.892	115.527	79.6143	121.71	1.52874	0.612344	1.65487	0.0221374
AT5G50920	148.325	152.963	228.635	231.778	150.644	230.206	1.52815	0.611784	2.90756	0.00123719
AT4G02260	10.0183	8.81871	15.3831	13.4012	9.41853	14.3921	1.52807	0.611709	1.29936	0.0501921
AT1G22630	20.6432	17.6029	30.5896	27.8429	19.1231	29.2163	1.5278	0.611459	1.411	0.0388148
AT4G08870	20.5211	19.3651	32.4729	28.454	19.9431	30.4635	1.52752	0.61119	1.42822	0.0373064
AT4G03150	11.0704	11.181	15.9335	18.0531	11.1257	16.9933	1.52739	0.611067	1.506	0.0311892
AT2G43445	5.05372	4.22231	6.39631	7.77039	4.63801	7.08335	1.52724	0.610925	1.03136	0.0930334
AT5G17670	25.9673	22.6955	37.8157	36.4844	24.3314	37.1501	1.52683	0.610544	1.73379	0.018459
AT5G53710	1	1	1.62989	1.42299	1	1.52644	1.52644	0.61017	1.43758	0.0365108
AT5G22320	6.56419	4.49643	9.16342	7.71773	5.53031	8.44058	1.52624	0.60998	0.831376	0.147443
AT2G42380	3.42068	4.109	5.9659	5.52575	3.76484	5.74583	1.52618	0.609926	1.39804	0.0399911
AT3G13525	1.68135	1.32279	2.3807	2.20362	1.50207	2.29216	1.526	0.609757	1.23296	0.0584846
AT2G33450	181.195	180.795	295.033	257.322	180.995	276.177	1.52588	0.609645	1.43088	0.0370783
AT1G05200	5.00724	3.99554	7.70872	6.02779	4.50139	6.86826	1.52581	0.609574	0.862422	0.137271
AT3G56940	331.689	322.659	496.219	501.977	327.174	499.098	1.52548	0.609266	3.01378	0.000968779
AT5G42070	29.9817	26.6838	45.0387	41.3903	28.3327	43.2145	1.52525	0.609046	1.58115	0.0262331
AT3G12080	23.9022	20.3265	36.2858	31.1718	22.1143	33.7288	1.5252	0.608999	1.18583	0.0651876
AT3G18080	51.0098	44.9998	74.492	71.9315	48.0048	73.2117	1.52509	0.608896	1.78569	0.01638
AT2G30170	14.224	9.72113	18.0371	18.4767	11.9726	18.2569	1.52489	0.608707	0.963252	0.10883
AT3G13438	2.7542	2.70574	3.86965	4.45511	2.72997	4.16238	1.5247	0.608523	1.40262	0.039571
AT4G19100	19.5984	19.2334	29.2635	29.937	19.4159	29.6003	1.52454	0.608373	2.85038	0.0014113
AT4G27700	41.1948	38.8124	69.7214	52.2006	40.0036	60.961	1.52389	0.607758	0.850104	0.14122
AT4G18593	11.514	11.4633	19.055	15.956	11.4886	17.5055	1.52372	0.6076	1.21904	0.0603887
AT5G63320	6.39942	6.35488	11.1302	8.30347	6.37715	9.71683	1.52369	0.607574	0.847809	0.141968
AT1G12860	10.1091	9.49096	15.8916	13.9664	9.80001	14.929	1.52336	0.607261	1.435	0.0367279
AT1G28010	2.11263	2.12673	3.42314	3.03305	2.11968	3.22809	1.52292	0.606837	1.52821	0.029634
AT3G58120	13.4852	11.8652	23.3315	15.2613	12.6752	19.2964	1.52237	0.606319	0.603917	0.248933
AT5G40950	243.484	227.079	365.827	350.537	235.282	358.182	1.52235	0.606303	2.08506	0.00822121
AT5G05210	13.6551	15.273	23.2393	20.7905	14.464	22.0149	1.52204	0.606009	1.44664	0.0357568
AT4G24972	2.99809	2.43373	4.52634	3.74036	2.71591	4.13335	1.52191	0.605878	1.00249	0.0994277
AT1G16880	74.8503	66.626	110.262	104.934	70.7382	107.598	1.52107	0.605091	1.76413	0.0172134
AT5G52600	1.3847	1	1.51214	2.11479	1.19235	1.81346	1.52091	0.604937	0.6489	0.22444
AT1G33240	11.5731	10.7435	20.5924	13.3475	11.1583	16.9699	1.52083	0.60486	0.598622	0.251987
AT4G13410	1.51103	1.68697	2.89704	1.96578	1.599	2.43141	1.52058	0.604623	0.655487	0.221061
AT1G10320	4.29601	3.64603	6.97052	5.10418	3.97102	6.03735	1.52035	0.604407	0.765361	0.171648
AT4G05330	6.54148	5.29536	9.02421	8.96631	5.91842	8.99526	1.51988	0.603953	1.41202	0.0387236
AT3G60318	1	1	1.69921	1.34049	1	1.51985	1.51985	0.603928	0.994488	0.101277
AT3G03630	9.89525	9.59346	15.9195	13.6917	9.74435	14.8056	1.5194	0.603504	1.3377	0.0459518
AT3G25920	208.014	204.835	315.452	311.713	206.425	313.582	1.51911	0.60323	3.28067	0.000524
AT5G61300	2.69254	2.86715	4.49207	3.95319	2.77985	4.22263	1.51902	0.603137	1.43837	0.0364441
AT4G26880	1.61142	2.46977	2.59741	3.60097	2.0406	3.09919	1.51877	0.6029	0.601946	0.250066
AT1G57770	15.8883	14.8902	25.3306	21.3981	15.3893	23.3643	1.51822	0.602383	1.2289	0.0590331
AT3G12835	1.23823	1	2.20763	1.19029	1.11912	1.69896	1.51812	0.60229	0.417238	0.382615
AT5G47370	12.7176	12.1819	21.4412	16.3417	12.4498	18.8914	1.51741	0.601615	0.890901	0.128558
AT1G75960	3.6857	3.63206	5.98432	5.11849	3.65888	5.5514	1.51724	0.601451	1.31229	0.0487202
AT5G12900	3.73903	3.82928	6.14895	5.33219	3.78416	5.74057	1.517	0.601222	1.38315	0.0413856
AT5G55710	37.6902	38.4928	60.2869	55.282	38.0915	57.7845	1.51699	0.601212	1.79149	0.0161627
AT1G29560	1.2131	1.36112	2.40194	1.50268	1.28711	1.95231	1.51682	0.601045	0.550101	0.281773
AT2G21380	7.47461	7.25348	12.2816	10.0574	7.36404	11.1695	1.51676	0.600993	1.11646	0.076479
AT2G21370	8.77507	9.08026	15.361	11.7197	8.92767	13.5404	1.51667	0.600911	0.894326	0.127548
AT5G60970	3.22211	3.65083	5.29515	5.12661	3.43647	5.21088	1.51635	0.6006	1.78421	0.0164359
AT2G30950	87.9786	84.1128	130.968	129.931	86.0457	130.45	1.51605	0.600317	2.69353	0.00202522
AT2G40520	3.0628	2.53043	4.7798	3.69816	2.79662	4.23898	1.51575	0.600036	0.856637	0.139111
AT3G55630	8.96666	8.31259	14.1506	12.0335	8.63963	13.0921	1.51535	0.599652	1.2464	0.0567025
AT1G80831	1.76559	1	1	3.19007	1.3828	2.09504	1.51507	0.599385	0.220579	0.601757
AT5G23330	6.35638	6.21924	9.66787	9.37536	6.28781	9.52161	1.5143	0.598648	2.60453	0.00248582
AT2G01755	14.773	13.0683	22.3211	19.8262	13.9207	21.0737	1.51384	0.598216	1.37847	0.041834
AT5G10490	7.06837	6.48467	10.7958	9.71263	6.77652	10.2542	1.5132	0.597598	1.52437	0.0298972
AT5G28750	81.9251	71.1787	113.363	118.273	76.5519	115.818	1.51294	0.59735	1.65968	0.0218939
AT2G38600	1.30459	1.32876	2.31146	1.67212	1.31668	1.99179	1.51274	0.597162	0.771399	0.169278
AT1G06690	13.7016	13.2436	21.7572	19.0014	13.4726	20.3793	1.51265	0.597081	1.41397	0.0385505
AT5G20220	4.03816	4.34044	6.82835	5.84545	4.1893	6.3369	1.51264	0.597069	1.27721	0.0528186
AT2G34450	3.78134	2.81491	5.89366	4.08156	3.29813	4.98761	1.51226	0.596703	0.616826	0.241643
AT4G15510	9.45088	10.4161	15.3669	14.6697	9.9335	15.0183	1.51188	0.596345	1.87182	0.0134331
AT2G37240	9.47607	10.7943	15.2702	15.3705	10.1352	15.3204	1.5116	0.596077	1.79952	0.0158666
AT4G00780	4.31033	5.35969	7.31503	7.30213	4.83501	7.30858	1.5116	0.596072	1.37497	0.0421728
AT1G75150	2.9605	2.87577	5.42676	3.3943	2.91814	4.41053	1.51142	0.595905	0.552855	0.279992
AT2G27290	22.8062	23.4529	34.341	35.5354	23.1296	34.9382	1.51054	0.595067	2.48267	0.00329104
AT1G18810	1.99003	2.04326	2.77525	3.31715	2.01665	3.0462	1.51053	0.595053	1.19822	0.0633554
AT4G01580	8.60964	6.20987	11.8469	10.5217	7.40975	11.1843	1.50941	0.593981	0.956851	0.110446
AT3G49140	26.7668	25.9829	42.3905	37.2232	26.3749	39.8068	1.50927	0.593852	1.44577	0.0358284
AT2G32640	6.71945	6.51131	11.4091	8.55271	6.61538	9.9809	1.50874	0.593344	0.84418	0.143159
AT1G03300	1.84313	2.50281	3.13907	3.41583	2.17297	3.27745	1.50828	0.592906	1.04182	0.0908206
AT3G62930	3.38033	2.98255	5.89599	3.70086	3.18144	4.79842	1.50826	0.592882	0.546375	0.284201
AT4G36540	12.1505	9.44483	18.3848	14.183	10.7976	16.2839	1.5081	0.592729	0.797772	0.159305
AT1G13220	3.91341	3.974	6.49806	5.39337	3.94371	5.94572	1.50765	0.592299	1.16377	0.0685856
AT3G51750	1.57205	2.27025	2.57447	3.21778	1.92115	2.89613	1.50749	0.592152	0.753599	0.17636
AT4G27820	6.46942	4.58068	8.87174	7.78294	5.52505	8.32734	1.5072	0.59187	0.907197	0.123823
AT3G28210	2.80787	3.25644	4.2438	4.89305	3.03215	4.56842	1.50666	0.591355	1.22127	0.0600801
AT4G36520	3.68916	3.21523	5.92936	4.4716	3.45219	5.20048	1.50643	0.591132	0.823654	0.150088
AT4G09730	22.974	20.9251	34.4466	31.6727	21.9495	33.0597	1.50617	0.590882	1.63359	0.0232493
AT2G23840	3.90682	2.41587	5.2819	4.23871	3.16134	4.7603	1.50578	0.590515	0.655756	0.220924
AT2G44440	4.38592	4.19132	6.6444	6.27017	4.28862	6.45728	1.50568	0.590415	2.03034	0.00932532
AT3G49551	2.51383	2.27607	3.13152	4.08014	2.39495	3.60583	1.5056	0.590336	0.880636	0.131633
AT1G01790	13.4912	11.3346	20.6789	16.6956	12.4129	18.6873	1.50547	0.590215	0.961229	0.109338
AT1G28060	11.7125	11.9169	19.2363	16.3263	11.8147	17.7813	1.50502	0.58978	1.26054	0.0548858
AT2G27470	8.88847	8.69626	15.3261	11.1322	8.79236	13.2291	1.50462	0.589395	0.772403	0.168887
AT3G12170	3.92891	3.27278	5.42636	5.40759	3.60085	5.41697	1.50436	0.589151	1.50667	0.0311405
AT1G25440	22.9368	17.8472	29.5804	31.7644	20.392	30.6724	1.50414	0.588936	1.1837	0.0655096
AT2G04842	27.7129	24.1811	40.6101	37.4414	25.947	39.0257	1.50406	0.588858	1.50356	0.0313646
AT1G78230	2.06741	1.75584	2.60214	3.14728	1.91163	2.87471	1.5038	0.588614	1.03688	0.0918583
AT2G25930	9.80819	9.56058	15.6177	13.509	9.68438	14.5633	1.50379	0.588606	1.35431	0.0442272
AT1G73550	1.31606	1.26014	1.2659	2.60812	1.2881	1.93701	1.50377	0.588584	0.360585	0.435928
AT4G24090	18.0934	16.4727	28.8001	23.1742	17.2831	25.9872	1.50362	0.588439	1.01349	0.0969408
AT2G34420	3358.92	2829.09	4403.84	4899.43	3094	4651.64	1.50344	0.588263	1.29942	0.0501859
AT1G28730	1	1.16139	2.24872	1	1.0807	1.62436	1.50307	0.587908	0.319805	0.478845
AT4G34350	59.4786	57.4991	90.0104	85.7787	58.4889	87.8946	1.50276	0.587611	2.20405	0.006251
AT1G68238	77.2864	60.4083	105.775	101.147	68.8474	103.461	1.50276	0.58761	1.23379	0.0583726
AT3G43715	1.16139	1.2814	2.50453	1.16628	1.2214	1.8354	1.50271	0.587565	0.339878	0.457217
AT2G47660	1	1	1.50236	1.50106	1	1.50171	1.50171	0.586604	5.77574	1.67593e-06
AT3G63375	1.76064	5.32038	3.70166	6.93137	3.54051	5.31651	1.50162	0.586524	0.270131	0.53687
AT4G16807	1.60169	2.41874	3.60024	2.43502	2.01021	3.01763	1.50115	0.586069	0.533871	0.292502
AT2G31170	10.3609	8.07764	15.0125	12.6631	9.21928	13.8378	1.50096	0.585889	0.97411	0.106143
AT5G55450	4.20299	4.42634	8.11887	4.82587	4.31467	6.47237	1.50009	0.585046	0.493298	0.321145
AT1G78172	1.89593	4.39262	6.30166	3.13046	3.14428	4.71606	1.49989	0.584855	0.28602	0.517583
AT1G20970	8.00693	7.29141	12.4724	10.4724	7.64917	11.4724	1.49982	0.584788	1.15958	0.0692505
AT5G04810	15.0827	13.2544	23.4647	19.0285	14.1685	21.2466	1.49956	0.58454	1.00768	0.0982464
AT1G61275	2.77207	1.75809	3.89299	2.89975	2.26508	3.39637	1.49945	0.584431	0.598671	0.251959
AT5G39240	3.29404	3.32889	5.75663	4.1719	3.31147	4.96427	1.49911	0.58411	0.763559	0.172362
AT3G51880	22.3522	21.3515	33.4342	32.0712	21.8518	32.7527	1.49885	0.58386	2.22467	0.00596113
AT4G10120	1.77003	2.00605	2.81471	2.84345	1.88804	2.82908	1.49842	0.583444	1.80727	0.0155859
AT1G74170	4.16847	3.90372	6.99225	5.10009	4.03609	6.04617	1.49803	0.583062	0.769446	0.170041
AT3G04550	68.0771	67.6482	101.252	101.974	67.8627	101.613	1.49733	0.582392	3.80984	0.000154938
AT5G48790	12.5253	11.2305	16.854	18.7087	11.8779	17.7813	1.49701	0.582084	1.45846	0.034797
AT2G43900	3.53358	3.58923	6.3128	4.34987	3.56141	5.33134	1.49698	0.582051	0.671156	0.213228
AT5G55100	6.1344	5.46562	9.94893	7.41384	5.80001	8.68139	1.49679	0.58187	0.798512	0.159033
AT1G56500	10.1647	10.1482	15.2516	15.1453	10.1564	15.1985	1.49644	0.581532	3.9445	0.000113632
AT3G08920	36.1025	35.4334	52.6685	54.3628	35.7679	53.5157	1.49619	0.581294	2.58115	0.00262329
AT1G01725	4.03749	3.79696	6.61532	5.10378	3.91723	5.85955	1.49584	0.580958	0.898065	0.126455
AT5G41020	13.4737	13.086	20.6922	19.0242	13.2799	19.8582	1.49536	0.580492	1.78188	0.0165241
AT1G30610	6.44968	6.18266	10.1054	8.78027	6.31617	9.44284	1.49503	0.580171	1.35963	0.0436887
AT5G07240	5.84254	5.20514	8.61135	7.90205	5.52384	8.2567	1.49474	0.579895	1.53585	0.0291173
AT1G03780	3.33406	3.33581	5.71524	4.25301	3.33493	4.98412	1.49452	0.579681	0.816036	0.152744
AT4G13040	4.46802	3.80845	6.68093	5.68624	4.13823	6.18358	1.49426	0.579428	1.1215	0.0755969
AT5G53895	1.56399	1	1.5825	2.24772	1.282	1.91511	1.49385	0.579034	0.5472	0.283661
AT1G11860	307.43	290.562	459.592	433.332	298.996	446.462	1.49321	0.578413	1.95807	0.0110135
AT3G53800	11.7792	9.4692	16.0372	15.688	10.6242	15.8626	1.49306	0.578276	1.33443	0.0462993
AT4G01455	1.51144	1	2.7491	1	1.25572	1.87455	1.49281	0.57803	0.246345	0.567094
AT5G16710	63.219	53.0938	84.6012	89.0062	58.1564	86.8037	1.49259	0.577818	1.45354	0.035193
AT5G17710	55.0713	56.7493	86.1628	80.7348	55.9103	83.4488	1.49255	0.577776	1.97989	0.0104739
AT4G28025	30.558	25.9308	44.9924	39.3149	28.2444	42.1537	1.49246	0.577693	1.20166	0.0628555
AT4G15680	1.27083	1.89719	2.04851	2.67841	1.58401	2.36346	1.49207	0.577318	0.654891	0.221365
AT3G01920	6.48266	6.36768	10.0653	9.10409	6.42517	9.58469	1.49174	0.576997	1.64447	0.022674
AT2G26840	5.52245	5.99251	8.56048	8.61346	5.75748	8.58697	1.49145	0.576713	2.16021	0.00691502
AT1G73000	1.06869	1.31621	1.48663	2.07012	1.19245	1.77838	1.49137	0.576635	0.686731	0.205717
AT1G77060	17.5028	15.9131	26.8515	22.9819	16.7079	24.9167	1.49131	0.576578	1.22752	0.0592218
AT5G07690	1.78953	1.63303	3.03393	2.07002	1.71128	2.55197	1.49127	0.576541	0.643504	0.227246
AT1G33290	15.3685	14.5788	23.8302	20.8024	14.9737	22.3163	1.49037	0.575668	1.37132	0.0425287
AT3G01960	1	1	1.98063	1	1	1.49032	1.49032	0.575619	0.374019	0.42265
AT1G78630	365.195	343.49	524.4	531.751	354.342	528.076	1.4903	0.575602	2.36437	0.00432149
AT1G12250	17.7616	12.6705	24.2036	21.1457	15.2161	22.6746	1.49018	0.575484	0.890689	0.128621
AT2G30400	1.20098	1.25687	1.56485	2.0958	1.22892	1.83032	1.48937	0.574703	0.815193	0.153041
AT2G24060	41.9247	37.7248	64.0363	54.5819	39.8247	59.3091	1.48925	0.574589	1.19514	0.0638063
AT1G14030	14.8235	15.1507	24.0834	20.5518	14.9871	22.3176	1.48912	0.574462	1.2689	0.0538395
AT4G16370	16.4767	17.3144	22.7016	27.6047	16.8955	25.1531	1.48874	0.574096	1.09701	0.0799813
AT3G11450	17.6205	17.7158	28.6893	23.9172	17.6682	26.3033	1.48874	0.574091	1.16358	0.0686155
AT4G29610	1.58937	1.24264	1.83412	2.38125	1.416	2.10769	1.48847	0.573834	0.779284	0.166233
AT1G19080	5.64989	4.30713	8.72108	6.09959	4.97851	7.41034	1.48846	0.573825	0.618927	0.240477
AT1G04985	12.8019	13.0689	19.4687	19.0365	12.9354	19.2526	1.48836	0.573727	2.79238	0.00161293
AT1G17380	1.29579	1.55783	2.17115	2.07526	1.42681	2.1232	1.48808	0.573452	1.42169	0.0378714
AT1G17850	11.0939	8.87549	15.2259	14.4895	9.98468	14.8577	1.48805	0.573422	1.27581	0.0529893
AT5G19540	22.6571	21.2995	33.735	31.6692	21.9783	32.7021	1.48793	0.573304	1.88521	0.0130253
AT1G60950	1238.3	1174.37	1934.32	1654.56	1206.34	1794.44	1.48751	0.572899	1.26211	0.0546876
AT5G07020	74.0145	62.8311	108.128	95.405	68.4228	101.767	1.48732	0.572715	1.23002	0.0588815
AT2G21210	28.0799	25.3261	43.4691	35.961	26.703	39.7151	1.48729	0.572685	1.08163	0.0828648
AT3G17930	38.1025	39.5392	57.272	58.1752	38.8208	57.7236	1.48692	0.572331	2.69705	0.00200886
AT1G49010	7.54901	6.3125	11.9754	8.63424	6.93075	10.3048	1.48682	0.572232	0.7018	0.198701
AT5G12050	4.84684	5.09436	7.29111	7.48879	4.9706	7.38995	1.48673	0.572145	2.37077	0.00425826
AT4G27595	2.92082	2.03734	3.86564	3.50403	2.47908	3.68483	1.48637	0.571795	0.894723	0.127432
AT2G33800	223.294	230.21	336.179	337.862	226.752	337.021	1.48629	0.57172	2.98296	0.00104002
AT3G50750	4.97999	4.90225	7.05107	7.63524	4.94112	7.34315	1.48613	0.571562	1.83218	0.0147169
AT5G41740	1.34464	1.25272	1.62054	2.23918	1.29868	1.92986	1.48602	0.571451	0.742262	0.181025
AT3G08740	142.6	132.194	209.527	198.602	137.397	204.065	1.48522	0.570678	1.90088	0.0125637
AT2G18193	3.91356	3.59656	5.59175	5.5587	3.75506	5.57522	1.48472	0.570193	2.12042	0.00757851
AT3G46080	1.20698	1.41864	1.476	2.42062	1.31281	1.94831	1.48407	0.569561	0.495368	0.319618
AT1G73110	13.9459	13.0675	21.3691	18.7167	13.5067	20.0429	1.48392	0.569417	1.36882	0.0427742
AT5G05800	7.67768	6.27529	11.2451	9.45933	6.97648	10.3522	1.48387	0.569365	1.01351	0.0969376
AT5G08280	140.499	142.372	213.383	206.294	141.436	209.838	1.48363	0.569133	2.5436	0.00286024
AT5G13720	9.41643	6.83534	11.6151	12.4942	8.12589	12.0546	1.48349	0.568991	0.990214	0.102279
AT2G35130	6.03457	4.45589	8.26699	7.29539	5.24523	7.78119	1.48348	0.568986	0.952146	0.111649
AT3G12685	5.34816	5.38472	6.3293	9.59026	5.36644	7.95978	1.48325	0.568763	0.597386	0.252705
AT3G19650	9.65836	7.15048	13.4943	11.432	8.40442	12.4631	1.48293	0.568447	0.887374	0.129606
AT4G04695	2.97403	3.10044	4.637	4.37026	3.03724	4.50363	1.4828	0.568327	2.00092	0.00997883
AT4G14870	39.4802	43.2951	57.9606	64.767	41.3876	61.3638	1.48266	0.568188	1.44263	0.0360882
AT4G33010	95.4315	92.9444	155.422	123.814	94.188	139.618	1.48233	0.567869	0.986094	0.103254
AT5G06670	2.76806	2.75412	4.52583	3.65916	2.76109	4.09249	1.4822	0.567739	1.03796	0.0916302
AT2G29300	2.26586	1.64584	3.07382	2.72402	1.95585	2.89892	1.48218	0.567718	0.928834	0.117806
AT1G30320	3.87866	3.47935	5.70649	5.19784	3.67901	5.45217	1.48197	0.567513	1.49923	0.0316793
AT5G06710	2.09771	2.69074	4.05771	3.03749	2.39422	3.5476	1.48173	0.567286	0.721709	0.189798
AT5G38660	22.3888	19.4984	31.191	30.8539	20.9436	31.0225	1.48124	0.566804	1.69444	0.0202098
AT1G05660	4.96017	5.66066	8.48039	7.25063	5.31041	7.86551	1.48115	0.566716	1.16195	0.0688727
AT3G58940	2.67138	2.20879	4.08415	3.1414	2.44008	3.61277	1.4806	0.566177	0.8093	0.155131
AT5G24580	5.57541	5.085	9.28213	6.5016	5.33021	7.89187	1.48059	0.566175	0.675191	0.211256
AT3G44960	2.43271	2.0594	2.79358	3.85692	2.24606	3.32525	1.48048	0.566067	0.708749	0.195547
AT5G63160	5.25943	5.27405	7.27152	8.32241	5.26674	7.79697	1.48041	0.566002	1.39223	0.0405295
AT3G06100	1.07514	1	1.60126	1.47066	1.03757	1.53596	1.48034	0.565932	1.65574	0.0220934
AT1G21930	11.9563	11.9314	17.0409	18.3174	11.9438	17.6792	1.4802	0.565788	1.91495	0.0121632
AT5G41140	5.17342	4.92531	8.97455	5.97155	5.04937	7.47305	1.48	0.565594	0.60388	0.248954
AT2G30890	3.5132	2.56664	4.64262	4.35369	3.03992	4.49815	1.4797	0.565301	1.00682	0.098441
AT3G56970	1	1	1.32668	1.63231	1	1.4795	1.4795	0.565105	1.05395	0.0883178
AT4G15030	7.36727	8.27835	13.9289	9.2174	7.82281	11.5732	1.47941	0.565026	0.587583	0.258474
AT5G57960	6.7812	7.36531	11.2037	9.72322	7.07326	10.4635	1.4793	0.564913	1.29308	0.0509241
AT4G21930	1	1.34581	2.02267	1.44689	1.17291	1.73478	1.47904	0.564665	0.626579	0.236277
AT1G72420	5.30749	4.4592	7.01675	7.42799	4.88335	7.22237	1.47898	0.564602	1.41688	0.0382931
AT5G41790	9.048	8.07743	14.9549	10.3729	8.56272	12.6639	1.47895	0.564577	0.653642	0.222002
AT4G30935	5.79166	5.23251	7.77777	8.52529	5.51209	8.15153	1.47885	0.564473	1.52466	0.0298771
AT1G77930	5.52335	5.56251	8.36679	8.0171	5.54293	8.19194	1.47791	0.563556	2.35832	0.00438212
AT1G43670	42.1988	34.9997	59.1207	54.9559	38.5992	57.0383	1.4777	0.563358	1.32528	0.0472847
AT4G18740	5.20268	4.5234	7.83334	6.53875	4.86304	7.18605	1.47769	0.563341	1.06357	0.0863831
AT1G68830	11.9291	10.0236	16.5873	15.8465	10.9764	16.2169	1.47744	0.563098	1.44364	0.0360049
AT5G20630	417.162	402.169	616.488	593.831	409.666	605.159	1.4772	0.562868	2.3193	0.00479404
AT5G19260	2.82395	3.90662	4.80441	5.13719	3.36529	4.9708	1.47708	0.562749	0.978139	0.105163
AT5G46845	1	1.13549	1.45164	1.70234	1.06775	1.57699	1.47693	0.562606	1.15399	0.0701468
AT5G65180	2.71625	4.04779	5.265	4.72481	3.38202	4.9949	1.4769	0.562573	0.812769	0.153897
AT5G66562	1.34266	1.83002	2.03342	2.65184	1.58634	2.34263	1.47675	0.562423	0.710662	0.194688
AT5G57170	17.0279	14.1923	24.6558	21.4343	15.6101	23.0451	1.47629	0.561977	1.12987	0.0741532
AT1G69070	8.23536	8.87005	13.9177	11.3347	8.55271	12.6262	1.47628	0.561964	1.03572	0.0921044
AT3G10120	4.33806	3.47247	6.03906	5.49125	3.90526	5.76515	1.47625	0.561938	1.16638	0.0681739
AT4G39190	2.15633	2.07008	2.7878	3.4499	2.1132	3.11885	1.47589	0.561584	1.02322	0.0947948
AT2G21960	22.6706	20.6306	35.3473	28.5396	21.6506	31.9434	1.47541	0.561112	0.994044	0.101381
AT4G10060	10.7935	11.1234	18.7967	13.5363	10.9584	16.1665	1.47526	0.560966	0.728676	0.186777
AT3G45430	2.18063	2.31012	3.49812	3.12592	2.24537	3.31202	1.47504	0.560757	1.4885	0.0324711
AT5G08540	28.8494	32.2187	47.1775	42.8955	30.534	45.0365	1.47496	0.560677	1.47466	0.0335231
AT2G05620	44.9312	40.857	64.4855	62.0484	42.8941	63.2669	1.47496	0.560672	1.87597	0.0133054
AT1G71500	75.6218	78.7591	116.594	111.106	77.1905	113.85	1.47492	0.56064	2.13367	0.00735079
AT3G55840	1.73161	1.86075	2.0897	3.20856	1.79618	2.64913	1.47487	0.560586	0.570114	0.269083
AT5G38990	3.11025	2.58102	4.51348	3.87802	2.84564	4.19575	1.47445	0.560179	1.08421	0.0823732
AT3G14930	96.6731	87.7648	137.484	134.4	92.219	135.942	1.47412	0.559855	1.94222	0.011423
AT2G24990	8.1552	8.22822	12.0509	12.0975	8.19171	12.0742	1.47395	0.55969	3.90526	0.000124378
AT2G17240	69.8818	58.2072	94.1704	94.6244	64.0445	94.3974	1.47393	0.559673	1.45467	0.0351018
AT5G64780	2.38981	2.67995	4.39001	3.07851	2.53488	3.73426	1.47315	0.558905	0.665458	0.216044
AT5G55740	5.68158	7.46571	10.4513	8.91652	6.57364	9.68389	1.47314	0.558893	0.927114	0.118273
AT3G15900	11.9701	12.7904	19.6779	16.7877	12.3802	18.2328	1.47274	0.558499	1.22176	0.0600122
AT1G04020	5.55905	4.37051	7.89366	6.72291	4.96478	7.30829	1.47203	0.557804	0.971495	0.106784
AT5G02710	26.84	21.3517	38.4751	32.4545	24.0959	35.4648	1.47182	0.557603	0.966681	0.107974
AT5G52410	2.76197	2.51521	4.07363	3.69292	2.63859	3.88327	1.47172	0.557506	1.49968	0.0316464
AT5G06340	39.7262	34.0041	54.0556	54.4503	36.8652	54.2529	1.47166	0.557442	1.58267	0.0261413
AT3G44730	2.26664	2.6934	3.73037	3.56844	2.48002	3.6494	1.47152	0.55731	1.44317	0.0360436
AT1G74730	106.36	97.2864	154.122	145.533	101.823	149.828	1.47145	0.557241	1.7821	0.0165158
AT1G75490	1.29176	1	1.65633	1.71554	1.14588	1.68593	1.4713	0.557089	1.16569	0.0682828
AT2G26211	2.79395	1.77216	4.40117	2.31681	2.28306	3.35899	1.47127	0.557061	0.345061	0.451792
AT5G22640	47.6981	44.9453	73.8962	62.3803	46.3217	68.1383	1.47098	0.556777	1.17791	0.0663883
AT4G13670	26.7694	28.3774	42.3715	38.748	27.5734	40.5598	1.47097	0.556773	1.64757	0.0225129
AT3G21200	54.4127	54.1899	85.3077	74.44	54.3013	79.8739	1.47094	0.556738	1.37343	0.0423226
AT4G27657	1.55783	2.72995	1.78654	4.51961	2.14389	3.15307	1.47073	0.55653	0.246169	0.567324
AT1G28230	2.15464	1.97146	2.94126	3.12616	2.06305	3.03371	1.4705	0.556304	1.75683	0.0175053
AT1G61665	1	1	1.7431	1.1976	1	1.47035	1.47035	0.556161	0.644433	0.22676
AT1G79280	7.2188	7.00925	11.1719	9.74592	7.11402	10.4589	1.47018	0.555993	1.36235	0.0434155
AT1G74470	328.401	320.082	465.702	487.668	324.242	476.685	1.47015	0.555968	2.23042	0.0058828
AT2G31035	1.03539	1.13076	1.64253	1.5418	1.08308	1.59216	1.47004	0.555854	1.74331	0.0180589
AT1G27480	9.98174	6.8692	13.1596	11.6075	8.42547	12.3836	1.46978	0.555598	0.822141	0.150612
AT2G23590	3.0071	3.13953	5.3136	3.71753	3.07331	4.51556	1.46928	0.555111	0.670622	0.21349
AT5G04560	4.83625	5.39197	8.2672	6.75992	5.11411	7.51356	1.46918	0.555014	1.01697	0.0961678
AT5G52390	1	1.24146	1.24675	2.04635	1.12073	1.64655	1.46918	0.555007	0.474885	0.335054
AT1G73885	138.939	135.532	202.266	200.819	137.236	201.542	1.46859	0.554428	3.0825	0.000826986
AT3G07670	13.5243	13.512	21.2095	18.4942	13.5181	19.8519	1.46854	0.554379	1.36648	0.0430053
AT4G19980	1.81026	2.35167	3.26787	2.84356	2.08096	3.05571	1.46841	0.554257	0.977922	0.105215
AT2G01918	6.34521	5.90958	9.77003	8.22382	6.12739	8.99692	1.46831	0.554159	1.15368	0.0701977
AT4G16950	12.5666	11.1325	18.4073	16.3888	11.8496	17.3981	1.46825	0.554093	1.33393	0.0463525
AT1G75310	4.15261	3.61868	6.06337	5.34512	3.88564	5.70424	1.46803	0.553882	1.25533	0.055548
AT1G21600	38.7939	35.3505	58.871	49.919	37.0722	54.395	1.46727	0.553137	1.16226	0.0688238
AT5G28770	10.1957	6.64826	13.3041	11.4098	8.42198	12.357	1.46723	0.553094	0.722422	0.189486
AT3G24010	7.91952	8.93026	10.68	14.042	8.42489	12.361	1.4672	0.553065	0.812009	0.154167
AT4G40011	1.06456	1	1.69044	1.33784	1.03228	1.51414	1.46679	0.552665	0.939379	0.11498
AT3G04210	1.13061	1	1.53392	1.59121	1.06531	1.56256	1.46677	0.552645	1.69997	0.0199541
AT1G64510	195.973	185.897	288.311	271.757	190.935	280.034	1.46664	0.55252	1.93476	0.011621
AT4G31530	20.1904	18.9254	29.0824	28.2786	19.5579	28.6805	1.46644	0.552319	2.17519	0.00668056
AT1G78730	2.2793	2.89403	4.02857	3.55626	2.58667	3.79241	1.46614	0.552022	1.0474	0.0896611
AT1G70200	27.2569	24.9335	38.0574	38.4602	26.0952	38.2588	1.46612	0.552005	2.03315	0.00926515
AT1G28830	1.21417	1.15691	1.366	2.11004	1.18554	1.73802	1.46602	0.551902	0.557773	0.276839
AT5G48690	1.62087	1.43366	2.39099	2.087	1.52726	2.23899	1.46601	0.551899	1.24012	0.0575284
AT1G33760	1.24619	1.03984	1.13072	2.21935	1.14302	1.67503	1.46545	0.551343	0.358295	0.438233
AT5G45475	1.32315	1.10352	1.60918	1.94695	1.21334	1.77807	1.46543	0.551328	0.969902	0.107176
AT2G28800	66.9513	67.6416	101.796	95.4232	67.2965	98.6096	1.4653	0.551198	1.98655	0.0103145
AT2G48070	39.7777	36.8822	57.5077	54.8157	38.33	56.1617	1.46522	0.551113	1.91838	0.0120675
AT1G28900	1	1	1.93008	1	1	1.46504	1.46504	0.550939	0.374019	0.42265
AT2G21710	2.76278	3.19882	4.68698	4.04565	2.9808	4.36632	1.46481	0.550717	1.15379	0.0701799
AT1G44910	5.37806	6.18267	8.9601	7.97356	5.78037	8.46683	1.46476	0.550662	1.28554	0.0518153
AT5G13510	176.507	168.313	266.105	238.941	172.41	252.523	1.46467	0.550574	1.52354	0.0299546
AT2G44578	1.12278	1.18343	1.59319	1.78444	1.15311	1.68882	1.46458	0.550489	1.47723	0.0333247
AT1G01320	32.6628	33.3588	53.8815	42.8015	33.0108	48.3415	1.46441	0.550322	0.958971	0.109908
AT1G20015	2.07035	1.91758	3.00646	2.83343	1.99397	2.91995	1.46439	0.5503	1.81871	0.0151808
AT3G62940	13.7018	11.7514	19.715	17.5341	12.7266	18.6245	1.46344	0.54936	1.24896	0.0563685
AT1G73530	23.016	21.7375	33.2077	32.2736	22.3767	32.7406	1.46315	0.549082	2.23769	0.00578506
AT2G02120	9.1569	4.94538	11.2795	9.34463	7.05114	10.3121	1.46247	0.548407	0.530681	0.294659
AT3G20230	38.2599	35.8904	57.8477	50.539	37.0752	54.1933	1.46172	0.547662	1.32928	0.0468513
AT5G07571	1	1	1.46869	1.45466	1	1.46168	1.46168	0.547626	3.63696	0.000230696
AT1G68150	3.75974	3.73567	6.5224	4.43225	3.7477	5.47733	1.46152	0.547465	0.620202	0.239772
AT5G35170	19.7381	15.9183	29.2727	22.8342	17.8282	26.0534	1.46136	0.547311	0.798335	0.159098
AT5G16140	6.06449	7.08609	10.4221	8.78568	6.57529	9.60389	1.4606	0.546564	1.05444	0.0882176
AT3G59060	17.153	14.8208	25.8665	20.8309	15.9869	23.3487	1.46049	0.546452	0.929819	0.117539
AT1G59840	7.2347	7.5018	11.2121	10.3086	7.36825	10.7604	1.46037	0.546336	1.72713	0.0187443
AT5G51100	23.9002	25.6745	35.8842	36.502	24.7874	36.1931	1.46014	0.54611	2.17294	0.00671523
AT2G48000	4.89564	4.34705	7.26547	6.22753	4.62134	6.7465	1.45986	0.545827	1.16404	0.0685428
AT5G67030	24.3509	19.9766	33.0289	31.6683	22.1638	32.3486	1.45953	0.545502	1.32757	0.0470363
AT3G10405	9.80806	10.8614	15.464	14.696	10.3347	15.08	1.45916	0.545136	1.73636	0.0183502
AT1G61190	7.48256	6.81355	10.8	10.0601	7.14805	10.4301	1.45915	0.545125	1.65127	0.0223217
AT4G36988	1.4978	1.43298	3.27643	1	1.46539	2.13822	1.45914	0.545123	0.211492	0.61448
AT5G08050	89.3097	82.4927	131.653	118.979	85.9012	125.316	1.45884	0.544821	1.49827	0.0317488
AT3G11630	311.677	283.326	454.126	413.832	297.502	433.979	1.45874	0.544727	1.50765	0.0310704
AT5G18240	1.89579	1.52106	2.51434	2.4672	1.70842	2.49077	1.45794	0.543926	1.27066	0.0536219
AT5G62720	85.203	79.3533	127.44	112.443	82.2782	119.941	1.45775	0.543746	1.36894	0.0427624
AT2G36280	1	1	1	1.91503	1	1.45751	1.45751	0.54351	0.374019	0.42265
AT3G12020	5.26708	4.97758	7.70123	7.22949	5.12233	7.46536	1.45742	0.543413	1.86437	0.0136656
AT1G80790	13.2404	12.784	21.4363	16.4887	13.0122	18.9625	1.45729	0.543286	0.857296	0.138901
AT3G16730	3.13877	3.29968	5.04525	4.33377	3.21923	4.68951	1.45672	0.542722	1.24886	0.0563823
AT1G64490	10.5298	8.70133	14.6235	13.39	9.61554	14.0068	1.45668	0.542684	1.23905	0.0576696
AT1G15160	2.31144	1.81623	3.57656	2.43588	2.06384	3.00622	1.45662	0.542624	0.57049	0.26885
AT5G01590	55.4062	56.0423	85.3615	76.9372	55.7242	81.1493	1.45627	0.542274	1.57659	0.02651
AT3G29075	9.66516	11.476	16.0363	14.7495	10.5706	15.3929	1.4562	0.54221	1.30828	0.0491722
AT5G24470	8.17441	6.22866	10.7325	10.2394	7.20154	10.486	1.45607	0.542084	1.08594	0.0820458
AT4G01935	8.03952	4.96748	9.90215	9.03006	6.5035	9.4661	1.45554	0.541554	0.688921	0.204682
AT4G02400	9.87739	9.65336	15.314	13.1115	9.76537	14.2127	1.45542	0.541437	1.2462	0.0567283
AT2G21530	37.1928	32.8309	50.3458	51.5489	35.0119	50.9474	1.45515	0.541164	1.70849	0.0195664
AT4G38910	2.54808	2.57926	4.24726	3.21335	2.56367	3.7303	1.45506	0.541083	0.816035	0.152744
AT3G06840	6.56931	5.75264	8.65309	9.27611	6.16097	8.9646	1.45506	0.541081	1.49542	0.0319578
AT1G18430	1.63298	1.17933	1.46935	2.62266	1.40615	2.046	1.45503	0.541053	0.386883	0.410314
AT3G06070	6.05662	6.49399	10.5501	7.71103	6.2753	9.13055	1.455	0.541017	0.732472	0.185152
AT1G80840	2.14439	4.51474	1.73357	7.95458	3.32957	4.84407	1.45487	0.540886	0.158808	0.693733
AT2G38460	3.67861	2.64472	5.27025	3.92907	3.16167	4.59966	1.45482	0.540843	0.635367	0.231543
AT3G17040	14.1774	13.6685	22.4799	18.0308	13.923	20.2554	1.45482	0.54084	0.976377	0.10559
AT3G54210	308.366	302.908	445.708	443.488	305.637	444.598	1.45466	0.540681	3.34757	0.000449193
AT5G09990	1.20784	1.23483	1.42896	2.12389	1.22133	1.77642	1.45449	0.540516	0.599484	0.251487
AT1G19050	9.79635	8.65089	13.693	13.1375	9.22362	13.4153	1.45445	0.54047	1.65184	0.0222925
AT5G10910	10.3015	13.2813	18.6067	15.6821	11.7914	17.1444	1.45398	0.540006	0.905354	0.12435
AT1G63360	4.20118	4.10641	6.25433	5.82364	4.1538	6.03898	1.45385	0.539876	1.87271	0.0134058
AT1G02150	49.4392	44.5465	69.03	67.5544	46.9929	68.2922	1.45325	0.539278	1.85113	0.0140887
AT2G32860	2.21161	1.32702	2.26145	2.88063	1.76931	2.57104	1.45313	0.539162	0.55934	0.275842
AT4G01883	7.86323	6.67442	10.9813	10.1401	7.26883	10.5607	1.45288	0.538911	1.34098	0.0456062
AT2G41640	6.34725	6.66328	9.11393	9.78649	6.50526	9.45021	1.4527	0.538739	1.80833	0.0155479
AT2G47750	2.85055	3.22431	4.6668	4.15742	3.03743	4.41211	1.45258	0.538617	1.31016	0.0489601
AT2G23960	2.08647	1.89065	2.59934	3.17749	1.98856	2.88842	1.45252	0.538555	1.00719	0.0983575
AT3G29185	30.6955	25.2242	41.1369	40.0813	27.9599	40.6091	1.45241	0.538445	1.34442	0.0452462
AT5G62280	21.1152	14.9002	29.345	22.9631	18.0077	26.154	1.45238	0.538423	0.680051	0.208905
AT3G02840	1.07079	1.07021	1.06529	2.04379	1.0705	1.55454	1.45216	0.538205	0.369809	0.426767
AT3G28270	1.57718	1.41223	2.54739	1.79336	1.4947	2.17037	1.45204	0.538085	0.653473	0.222089
AT4G28660	133.984	132.563	190.055	196.964	133.273	193.509	1.45197	0.538015	2.46711	0.00341106
AT5G52280	4.11072	4.83618	7.51241	5.47737	4.47345	6.49489	1.45187	0.537916	0.694206	0.202206
AT2G31840	20.0537	19.8706	30.682	27.2823	19.9621	28.9821	1.45185	0.537897	1.4708	0.0338219
AT1G74850	14.285	13.1465	20.7941	19.0248	13.7158	19.9094	1.45157	0.537616	1.55817	0.0276587
AT5G51795	2.8689	3.82284	4.60004	5.11346	3.34587	4.85675	1.45157	0.53761	0.96623	0.108086
AT2G34810	3.93797	4.16838	4.96343	6.80051	4.05318	5.88197	1.4512	0.537245	0.728439	0.186879
AT1G62850	4.57284	4.98975	7.70451	6.17021	4.7813	6.93736	1.45094	0.536985	0.94575	0.113305
AT4G26190	12.8945	12.3919	21.1687	15.5185	12.6432	18.3436	1.45087	0.536916	0.739519	0.182172
AT4G39800	19.8383	20.1795	30.2838	27.7557	20.0089	29.0198	1.45034	0.536394	1.71098	0.0194547
AT1G78650	4.78943	4.64603	7.2107	6.4702	4.71773	6.84045	1.44995	0.535999	1.5208	0.0301441
AT5G51680	2.2996	1.24793	2.56382	2.579	1.77376	2.57141	1.44969	0.535747	0.57089	0.268603
AT5G13770	10.1772	7.9521	12.4616	13.8139	9.06465	13.1377	1.44934	0.535393	1.05172	0.0887728
AT4G31880	9.33652	9.50755	14.8126	12.4942	9.42204	13.6534	1.44909	0.535148	1.16833	0.0678689
AT2G01100	13.089	12.0682	20.6313	15.8148	12.5786	18.223	1.44873	0.534792	0.827179	0.148875
AT3G63540	229.251	214.642	320.002	323.054	221.947	321.528	1.44867	0.534733	2.2543	0.00556802
AT1G36732	33.4656	27.8089	34.3517	54.4125	30.6373	44.3821	1.44863	0.534691	0.497614	0.31797
AT1G64355	17.059	16.7688	25.4825	23.5215	16.9139	24.502	1.44863	0.534686	1.77887	0.0166391
AT3G46090	1	1.33651	1.08251	2.30145	1.16826	1.69198	1.4483	0.534357	0.305749	0.494596
AT3G63190	75.4594	73.2658	112.639	102.747	74.3626	107.693	1.44822	0.534277	1.65105	0.0223333
AT2G21385	22.6871	20.6834	33.1079	29.6957	21.6852	31.4018	1.44807	0.534133	1.40838	0.0390496
AT5G36170	20.4639	17.7796	31.0989	24.2675	19.1217	27.6832	1.44773	0.533795	0.839057	0.144858
AT4G24680	8.56763	7.52825	12.8236	10.4784	8.04794	11.651	1.4477	0.533765	0.971431	0.106799
AT2G45100	2.92137	2.90427	4.35952	4.07425	2.91282	4.21689	1.4477	0.533762	1.92831	0.0117948
AT1G65860	2.67628	2.63361	4.12501	3.56002	2.65495	3.84252	1.4473	0.533368	1.2801	0.0524685
AT2G21185	1	1	1	1.89412	1	1.44706	1.44706	0.533124	0.374019	0.42265
AT1G03600	254.297	216.24	345.884	334.886	235.269	340.385	1.44679	0.532859	1.47212	0.0337192
AT3G14780	1.83719	1.23983	2.05598	2.39577	1.53851	2.22588	1.44678	0.532841	0.736478	0.183452
AT2G47940	63.0152	52.2001	88.0398	78.649	57.6076	83.3444	1.44676	0.532826	1.15826	0.0694601
AT1G66940	9.80039	9.87126	16.5156	11.9415	9.83582	14.2285	1.4466	0.53267	0.710471	0.194773
AT3G49290	4.63999	4.11441	7.57194	5.09081	4.3772	6.33138	1.44644	0.53251	0.579671	0.263226
AT1G18300	3.20174	6.40251	4.6126	9.27941	4.80213	6.94601	1.44644	0.53251	0.277579	0.527741
AT5G05580	15.9536	13.2087	23.9085	18.2668	14.5812	21.0877	1.44623	0.532294	0.76	0.17378
AT5G07152	2.40309	2.14175	3.59945	2.97031	2.27242	3.28488	1.44555	0.531615	1.01323	0.0969996
AT4G14890	81.1831	84.0884	122.273	116.613	82.6358	119.443	1.44541	0.531482	2.13157	0.00738638
AT4G01023	1	1	1.2311	1.65962	1	1.44536	1.44536	0.53143	0.761417	0.173214
AT5G12870	1.5635	1.61565	2.62073	1.97341	1.58957	2.29707	1.44508	0.531153	0.792637	0.161199
AT2G35700	1.74098	1.60529	2.40916	2.42644	1.67314	2.4178	1.44507	0.531142	2.0794	0.00832921
AT1G33600	8.07923	7.27178	10.6854	11.4954	7.67551	11.0904	1.4449	0.530974	1.57	0.0269152
AT3G22410	1.65216	1.04474	1.99278	1.90338	1.34845	1.94808	1.44469	0.530755	0.721231	0.190007
AT1G15260	16.1871	14.8021	20.5111	24.2586	15.4946	22.3848	1.44468	0.530754	1.12637	0.0747527
AT1G68862	3.35694	2.0431	4.37068	3.4289	2.70002	3.89979	1.44436	0.530428	0.559114	0.275986
AT5G09820	4.69983	5.61608	7.03371	7.86571	5.15795	7.44971	1.44431	0.530385	1.1818	0.065796
AT5G43210	3.45186	2.54646	2.95416	5.70798	2.99916	4.33107	1.4441	0.530166	0.341854	0.455141
AT5G08720	6.47254	5.54742	8.72958	8.62589	6.00998	8.67773	1.44389	0.529957	1.53583	0.0291189
AT2G35420	3.23605	4.54281	6.40419	4.82748	3.88943	5.61584	1.44387	0.529942	0.631105	0.233827
AT1G55110	3.73178	4.00294	6.37424	4.79292	3.86736	5.58358	1.44377	0.529842	0.780444	0.165789
AT5G19310	3.44714	3.32344	5.35726	4.41765	3.38529	4.88746	1.44373	0.529804	1.06171	0.0867542
AT3G47450	14.3939	12.3611	20.4552	18.168	13.3775	19.3116	1.44359	0.529659	1.21821	0.060505
AT2G39670	30.8778	32.4044	47.8859	43.4348	31.6411	45.6604	1.44307	0.529145	1.56817	0.0270292
AT1G37130	188.227	174.249	275.133	247.767	181.238	261.45	1.44258	0.528652	1.45858	0.0347871
AT1G72416	4.79769	4.64885	7.07859	6.54673	4.72327	6.81266	1.44236	0.528434	1.76896	0.0170232
AT1G79790	10.1086	11.2366	14.7517	16.0302	10.6726	15.3909	1.4421	0.528166	1.50684	0.0311283
AT5G09463	3.14436	4.14008	5.4284	5.07457	3.64222	5.25149	1.44184	0.527909	1.0315	0.0930027
AT1G47580	8.52895	7.33241	11.8338	11.0323	7.93068	11.433	1.44162	0.527689	1.40046	0.0397685
AT2G36990	22.0343	21.9807	33.4124	30.0303	22.0075	31.7214	1.44139	0.527459	1.53757	0.0290018
AT3G15190	246.855	253.798	364.324	357.231	250.326	360.778	1.44123	0.5273	2.69625	0.00201258
AT4G29750	9.49037	9.85373	14.0331	13.844	9.67205	13.9386	1.44112	0.527188	2.63888	0.00229679
AT5G19940	135.649	129.008	194.382	186.943	132.328	190.662	1.44083	0.5269	2.14105	0.00722684
AT1G72645	6.89433	4.51487	9.86143	6.57168	5.7046	8.21655	1.44034	0.526406	0.466597	0.34151
AT1G71720	17.457	18.6561	26.6942	25.3206	18.0566	26.0074	1.44033	0.526399	1.8896	0.0128943
AT3G02150	2.29451	2.05524	3.15758	3.10688	2.17488	3.13223	1.44019	0.526259	1.79782	0.0159288
AT3G18035	33.02	28.0162	45.4242	42.4675	30.5181	43.9459	1.43999	0.526062	1.35868	0.0437843
AT2G01340	5.49624	5.06593	7.79146	7.41638	5.28108	7.60392	1.43984	0.52591	1.83078	0.0147647
AT1G49380	9.66334	10.175	14.0178	14.5375	9.91917	14.2776	1.4394	0.525466	2.15942	0.00692753
AT2G38470	4.27625	6.23826	5.11099	10.0235	5.25725	7.56722	1.43939	0.525454	0.323712	0.474557
AT4G27520	79.809	72.4237	111.106	107.991	76.1163	109.549	1.43923	0.525296	1.85179	0.0140673
AT3G26710	45.6608	43.8275	65.4692	63.3115	44.7442	64.3903	1.43908	0.525144	2.28799	0.00515241
AT1G09770	18.7245	18.3046	27.4801	25.7937	18.5145	26.6369	1.4387	0.524767	1.94879	0.0112514
AT2G26150	1.57617	1.55001	2.15072	2.34676	1.56309	2.24874	1.43865	0.524715	1.6952	0.0201745
AT3G57470	9.42105	7.25879	14.0493	9.94259	8.33992	11.9959	1.43838	0.524441	0.592043	0.255833
AT4G13250	22.4636	24.2012	35.985	31.1154	23.3324	33.5502	1.43792	0.523984	1.23317	0.0584565
AT2G34170	4.82294	4.79777	7.11223	6.72044	4.81035	6.91634	1.4378	0.523865	2.06668	0.00857675
AT5G65770	6.81086	6.69421	10.4962	8.91993	6.75253	9.70807	1.43769	0.523755	1.18947	0.0646442
AT2G44870	36.5955	35.1051	52.6619	50.4137	35.8503	51.5378	1.43758	0.523646	2.13608	0.00731004
AT3G63050	1.83641	1.08797	2.08851	2.11504	1.46219	2.10177	1.43742	0.523478	0.638747	0.229748
AT5G08717	1	1	1.87483	1	1	1.43741	1.43741	0.523475	0.374019	0.42265
AT1G69670	6.42311	5.49181	9.1948	7.92727	5.95746	8.56104	1.43703	0.523088	1.09479	0.080392
AT4G37040	23.4974	23.3406	33.5497	33.7525	23.419	33.6511	1.43691	0.522974	3.80436	0.000156906
AT1G06180	4.74752	4.3029	6.9612	6.04293	4.52521	6.50207	1.43685	0.522913	1.21753	0.0605993
AT2G37660	171.826	181.572	265.654	241.886	176.699	253.77	1.43617	0.522226	1.574	0.0266685
AT1G58290	58.0854	53.8168	84.8813	75.8086	55.9511	80.345	1.43599	0.522041	1.4008	0.0397372
AT5G42270	78.7621	76.5055	110.915	112.033	77.6338	111.474	1.43589	0.521948	2.85952	0.00138189
AT4G26555	21.6539	20.4848	33.2453	27.2572	21.0693	30.2512	1.43579	0.521849	1.02261	0.0949279
AT4G19090	1.80335	1.37515	2.3664	2.19676	1.58925	2.28158	1.43563	0.521683	1.02173	0.0951185
AT5G06610	4.29944	5.15339	6.82781	6.74264	4.72642	6.78522	1.4356	0.521649	1.38935	0.0407989
AT4G17220	1.92132	2.41734	2.72248	3.50479	2.16933	3.11364	1.4353	0.521349	0.748809	0.178316
AT4G14605	5.2326	5.23308	7.15958	7.86163	5.23284	7.5106	1.43528	0.521336	1.63948	0.0229359
AT5G62980	14.1224	15.476	22.1361	20.3425	14.7992	21.2393	1.43516	0.521216	1.5359	0.029114
AT2G43030	255.587	249.421	355.817	368.899	252.504	362.358	1.43506	0.52111	2.36602	0.00430511
AT4G27620	7.28327	5.69023	10.1937	8.41515	6.48675	9.30441	1.43437	0.520419	0.847093	0.142202
AT5G50130	1.36219	1.39062	2.32984	1.61804	1.3764	1.97394	1.43413	0.520174	0.628147	0.235425
AT5G39980	5.06316	4.40053	6.47352	7.09848	4.73184	6.786	1.43411	0.520159	1.3391	0.0458039
AT5G35740	18.7511	16.4938	28.3144	22.221	17.6224	25.2677	1.43384	0.519882	0.845011	0.142886
AT5G53580	17.1562	16.685	26.928	21.5829	16.9206	24.2554	1.43349	0.519529	0.951561	0.111799
AT3G26085	8.69737	8.3297	14.2085	10.1902	8.51353	12.1993	1.43293	0.518972	0.679341	0.209247
AT2G46810	5.61206	4.41447	8.69588	5.67098	5.01326	7.18343	1.43288	0.518922	0.503356	0.313793
AT3G04260	21.8328	21.1946	32.4235	29.2237	21.5137	30.8236	1.43274	0.518781	1.53221	0.0293621
AT5G44650	45.2841	48.2086	67.7962	66.1496	46.7464	66.9729	1.43269	0.518723	2.16668	0.00681275
AT3G54500	16.8804	12.6678	23.9821	18.3491	14.7741	21.1656	1.43262	0.518652	0.676123	0.210803
AT5G67240	6.94612	7.14304	10.5872	9.59614	7.04458	10.0917	1.43255	0.518582	1.57827	0.0264078
AT4G16155	18.5175	18.4456	28.397	24.5455	18.4815	26.4713	1.43231	0.518343	1.27169	0.0534948
AT5G42310	12.614	10.7244	18.2692	15.1404	11.6692	16.7048	1.43153	0.51756	0.957267	0.11034
AT4G09040	42.297	38.7824	58.8609	57.1922	40.5397	58.0266	1.43135	0.517378	1.91542	0.0121502
AT5G35400	4.29406	3.93321	6.85592	4.91692	4.11363	5.88642	1.43095	0.516978	0.669481	0.214052
AT1G03580	1.06222	1	1.42005	1.53063	1.03111	1.47534	1.43082	0.516845	1.70352	0.0197915
AT5G58790	2.84892	2.32382	3.25105	4.14979	2.58637	3.70042	1.43074	0.51676	0.780814	0.165648
AT2G17110	3.59603	3.93382	5.32223	5.44562	3.76493	5.38393	1.43002	0.516036	1.91681	0.0121114
AT3G56910	387.72	348.969	503.011	550.421	368.344	526.716	1.42995	0.51597	1.45101	0.0353989
AT1G48698	1	1	1.36537	1.49436	1	1.42986	1.42986	0.515877	1.66195	0.0217798
AT3G54170	6.58922	7.21518	10.6742	9.06392	6.9022	9.86908	1.42985	0.51586	1.12307	0.0753232
AT1G44446	24.4841	23.2829	36.5321	31.7589	23.8835	34.1455	1.42967	0.51568	1.27586	0.0529831
AT5G08650	33.9293	31.9968	49.8668	44.368	32.9631	47.1174	1.4294	0.515409	1.39932	0.0398734
AT2G38300	1.83512	1.27284	2.46198	1.97996	1.55398	2.22097	1.42921	0.515221	0.670665	0.213469
AT3G19620	1.05112	1.23858	1.65256	1.61937	1.14485	1.63596	1.42898	0.514981	1.44887	0.0355737
AT3G47675	6.98958	6.6471	11.0243	8.46199	6.81834	9.74315	1.42896	0.514967	0.818173	0.151994
AT1G80810	3.29371	2.6954	5.28767	3.27051	2.99455	4.27909	1.42896	0.514964	0.460317	0.346484
AT1G69830	24.3494	20.6617	33.4905	30.8127	22.5055	32.1516	1.42861	0.51461	1.28794	0.0515296
AT2G24970	4.74249	3.38615	5.99759	5.61195	4.06432	5.80477	1.42823	0.514226	0.878426	0.132304
AT1G52040	1.19793	1.43473	1.91403	1.84573	1.31633	1.87988	1.42812	0.514117	1.35031	0.0446362
AT5G48175	1.41488	1.10332	2.04719	1.5484	1.2591	1.79779	1.42784	0.513836	0.681061	0.20842
AT3G01490	13.1049	10.8791	16.9112	17.326	11.992	17.1186	1.42751	0.513497	1.34236	0.0454616
AT5G46690	5.40287	6.139	8.89453	7.5807	5.77093	8.23761	1.42743	0.513422	1.0867	0.0819034
AT2G04560	2.94797	2.30708	3.91497	3.58565	2.62753	3.75031	1.42731	0.513303	1.04879	0.0893741
AT3G53830	3.85449	3.63649	5.70117	4.98813	3.74549	5.34465	1.42696	0.512941	1.29855	0.0502859
AT1G78990	4.04566	3.51481	6.48529	4.30232	3.78024	5.3938	1.42684	0.512826	0.541517	0.287397
AT2G25900	7.19482	5.19081	9.30096	8.36447	6.19282	8.83272	1.42628	0.512262	0.854886	0.139674
AT5G63550	13.3747	12.7749	21.6	15.6939	13.0748	18.6469	1.42617	0.512147	0.69619	0.201284
AT2G34510	15.7334	14.6756	21.5693	21.7937	15.2045	21.6815	1.42599	0.511964	2.16137	0.00689655
AT5G04220	3.17828	2.9321	5.50272	3.20966	3.05519	4.35619	1.42583	0.511807	0.424399	0.376358
AT1G79800	1	1	1.70733	1.14379	1	1.42556	1.42556	0.511528	0.568547	0.270056
AT5G44010	2.61256	2.28243	3.66999	3.30636	2.44749	3.48818	1.4252	0.511169	1.28885	0.0514225
AT1G06950	50.6287	48.1768	76.6817	64.1343	49.4028	70.408	1.42518	0.511147	1.08907	0.0814569
AT4G29940	2.93305	3.28908	4.64333	4.22428	3.11107	4.4338	1.42517	0.511136	1.39157	0.0405907
AT5G65220	428.013	401.295	580.997	600.799	414.654	590.898	1.42504	0.511002	2.05629	0.00878438
AT3G05750	3.26861	3.26105	5.40565	3.89822	3.26483	4.65193	1.42486	0.510823	0.683862	0.20708
AT5G60180	1.09542	1.10956	1.71851	1.42317	1.10249	1.57084	1.42481	0.510772	1.06121	0.0868545
AT3G02240	1.64877	2.32829	2.58645	3.07899	1.98853	2.83272	1.42453	0.510488	0.740144	0.18191
AT5G38050	2.54183	2.41139	3.7914	3.26445	2.47661	3.52793	1.4245	0.510451	1.21713	0.0606549
AT2G45180	697.847	575.15	922.364	890.847	636.499	906.606	1.42436	0.510318	1.29385	0.0508337
AT3G11170	49.6205	52.2203	77.4992	67.5545	50.9204	72.5269	1.42432	0.510272	1.28241	0.0521909
AT3G23900	6.66098	5.62192	9.22863	8.26334	6.14145	8.74598	1.42409	0.510041	1.1753	0.0667877
AT2G30424	10.1343	9.37328	14.3976	13.3821	9.75381	13.8899	1.42405	0.509995	1.64329	0.0227359
AT3G09430	2.36182	2.18286	3.43006	3.04129	2.27234	3.23568	1.42394	0.50989	1.33754	0.0459687
AT1G19715	14.2308	13.6552	22.7914	16.905	13.943	19.8482	1.42353	0.509468	0.735351	0.183928
AT1G12800	45.3437	42.8637	68.3003	57.2563	44.1037	62.7783	1.42342	0.509365	1.09226	0.0808612
AT3G03710	20.3508	19.0322	28.3294	27.7241	19.6915	28.0267	1.42329	0.509232	2.12558	0.00748896
AT2G22630	1.62638	1.14975	2.18797	1.76292	1.38807	1.97545	1.42317	0.509103	0.683585	0.207212
AT5G04900	13.285	11.0164	18.4083	16.1759	12.1507	17.2921	1.42313	0.509071	1.07612	0.083922
AT5G46270	1.67568	1.51564	2.58936	1.95188	1.59566	2.27062	1.423	0.508934	0.753577	0.176369
AT1G69530	91.6129	77.5775	127.352	113.378	84.5952	120.365	1.42283	0.508768	1.16223	0.068829
AT3G61950	1.96977	1.99676	3.3482	2.29492	1.98327	2.82156	1.42268	0.508615	0.597675	0.252537
AT5G64460	15.9216	15.5769	22.7324	22.0762	15.7492	22.4043	1.42256	0.508493	2.51046	0.00308705
AT3G58010	5.41404	4.64129	7.50225	6.80175	5.02766	7.152	1.42253	0.508459	1.25719	0.0553109
AT1G67860	3.28518	3.21872	3.63151	5.61669	3.25195	4.6241	1.42195	0.507866	0.521166	0.301185
AT3G15353	52.6461	49.3811	74.1341	70.8759	51.0136	72.505	1.42129	0.507199	1.94613	0.0113207
AT3G12480	11.4599	11.8016	17.3757	15.6843	11.6308	16.53	1.42123	0.507141	1.52813	0.0296393
AT5G47220	6.33732	7.06081	5.86535	13.1764	6.69906	9.52085	1.42122	0.507131	0.281758	0.522687
AT4G03635	3.21768	2.5627	4.14321	4.07102	2.89019	4.10711	1.42105	0.50696	1.1797	0.0661156
AT4G17750	2.5676	2.54894	4.0106	3.25969	2.55827	3.63515	1.42094	0.506842	0.986512	0.103154
AT3G07040	1.67407	2.08958	2.59049	2.75726	1.88182	2.67387	1.42089	0.506799	1.14611	0.0714309
AT1G02575	1.20453	1.09525	1.43638	1.83129	1.14989	1.63384	1.42086	0.506766	0.847671	0.142013
AT4G19830	7.82842	6.94238	11.6288	9.35833	7.3854	10.4936	1.42086	0.506759	0.901556	0.125442
AT1G53520	21.1763	20.138	30.0532	28.6371	20.6572	29.3451	1.42058	0.506479	1.99748	0.0100582
AT3G53920	7.78467	7.08918	10.7659	10.3506	7.43693	10.5582	1.4197	0.505591	1.78448	0.0164255
AT4G25470	1.76265	3.1094	2.20726	4.70815	2.43602	3.45771	1.41941	0.505289	0.262324	0.546608
AT4G11080	5.82142	6.39186	9.55216	7.78218	6.10664	8.66717	1.4193	0.505183	0.956853	0.110445
AT5G61040	4.78508	3.61742	6.09487	5.83059	4.20125	5.96273	1.41928	0.505154	1.00576	0.0986826
AT1G79580	1.77646	1.75667	2.68071	2.33278	1.76656	2.50674	1.41899	0.504869	1.29073	0.0511995
AT2G03440	39.5258	37.0144	54.9201	53.6875	38.2701	54.3038	1.41896	0.504836	2.12347	0.00752533
AT2G39250	4.86807	5.4077	6.91405	7.65843	5.13788	7.28624	1.41814	0.504	1.3679	0.0428648
AT4G25610	2.87629	2.74845	4.05942	3.91564	2.81237	3.98753	1.41786	0.503711	2.17822	0.0066341
AT5G13650	68.1054	69.1554	104.908	89.6965	68.6304	97.3022	1.41777	0.503626	1.19389	0.0639901
AT5G60600	59.7249	55.8229	84.6292	79.1836	57.7739	81.9064	1.41771	0.503559	1.72755	0.0187262
AT1G50660	11.5821	12.3487	17.9961	15.9282	11.9654	16.9621	1.4176	0.50345	1.34284	0.0454114
AT1G04420	52.3361	44.1047	69.9401	66.7217	48.2204	68.3309	1.41705	0.502894	1.34632	0.0450484
AT3G63300	3.97656	3.72739	6.06889	4.84611	3.85197	5.4575	1.41681	0.502643	0.907845	0.123639
AT1G69040	23.7905	22.4158	37.5398	27.9136	23.1031	32.7267	1.41655	0.502382	0.729697	0.186339
AT5G18140	8.10503	7.25164	12.5162	9.23587	7.67834	10.876	1.41646	0.502287	0.699368	0.199817
AT4G33350	20.8548	21.873	33.1285	27.3923	21.3639	30.2604	1.41643	0.502258	1.03356	0.0925629
AT2G40100	16.284	17.5859	25.7568	22.2153	16.935	23.986	1.41636	0.502189	1.18897	0.0647188
AT5G65850	1.74215	2.23868	3.01154	2.62628	1.99042	2.81891	1.41624	0.502065	0.925302	0.118768
AT4G32330	23.0399	21.4257	34.5859	28.3877	22.2328	31.4868	1.41623	0.502058	0.992259	0.101798
AT3G46970	19.8338	19.7509	27.6426	28.4122	19.7923	28.0274	1.41607	0.501897	2.65725	0.00220164
AT4G27430	9.84775	10.631	14.3622	14.6349	10.2394	14.4986	1.41596	0.501782	2.02934	0.00934663
AT3G27260	8.82759	8.33966	12.1597	12.1456	8.58363	12.1526	1.41579	0.501607	2.3331	0.00464406
AT1G23090	10.0068	9.64532	13.7657	14.0479	9.82605	13.9068	1.4153	0.501104	2.50273	0.00314244
AT2G47270	3.31299	4.70932	3.8756	7.4774	4.01116	5.6765	1.41518	0.500983	0.31926	0.479447
AT1G79170	2.77111	1.40127	3.11183	2.79238	2.08619	2.9521	1.41507	0.500874	0.464232	0.343375
AT3G21680	5.03012	4.61611	6.99642	6.65193	4.82312	6.82418	1.41489	0.500689	1.75367	0.0176332
AT4G27590	1.71783	1.2048	2.27271	1.86219	1.46131	2.06745	1.41479	0.500587	0.685436	0.206331
AT1G60000	41.5181	39.8682	56.2071	58.9206	40.6932	57.5639	1.41458	0.500377	2.05839	0.00874201
AT1G64500	8.50491	9.84769	13.4557	12.5019	9.1763	12.9788	1.41438	0.500169	1.35809	0.0438439
AT2G29210	13.2969	12.1371	21.6405	14.3327	12.717	17.9866	1.41437	0.500159	0.537045	0.290372
AT5G45830	1.57476	1.45245	2.38943	1.89205	1.51361	2.14074	1.41433	0.500121	0.872776	0.134037
AT3G26060	167.748	160.95	242.559	222.308	164.349	232.433	1.41427	0.500054	1.62457	0.0237372
AT2G22870	11.8056	8.85	15.1905	14.0158	10.3278	14.6031	1.41397	0.499748	0.939397	0.114975
AT1G54350	12.7634	11.2135	19.1828	14.7186	11.9884	16.9507	1.41393	0.499706	0.768206	0.170527
AT2G47910	35.5708	33.9498	51.4087	46.8871	34.7603	49.1479	1.41391	0.499688	1.57264	0.0267524
AT4G18480	192.003	194.102	261.493	284.241	193.053	272.867	1.41343	0.499204	1.70178	0.0198711
AT5G51010	46.2729	42.829	62.49	63.4175	44.5509	62.9537	1.41307	0.498836	2.03338	0.0092601
AT1G04880	1.21786	1.03132	1.89433	1.28293	1.12459	1.58863	1.41263	0.49838	0.547197	0.283663
AT2G43100	31.8874	31.5143	47.0937	42.4668	31.7009	44.7803	1.41259	0.49834	1.5218	0.0300747
AT4G05090	8.17753	6.21963	11.6013	8.73573	7.19858	10.1685	1.41257	0.498323	0.639938	0.229119
AT1G54500	72.5432	62.8514	96.9793	94.2543	67.6973	95.6168	1.41242	0.498166	1.50859	0.0310031
AT2G27680	50.3248	48.206	74.6079	64.5533	49.2654	69.5806	1.41236	0.49811	1.2335	0.0584111
AT2G35075	2.02977	1.83783	2.81109	2.65089	1.9338	2.73099	1.41224	0.497988	1.62495	0.0237165
AT5G17230	36.4126	32.6979	49.2516	48.3391	34.5553	48.7954	1.4121	0.497838	1.75536	0.0175648
AT1G58070	3.25176	3.46542	5.00757	4.47609	3.35859	4.74183	1.41185	0.497589	1.39471	0.0402987
AT1G44920	40.2451	41.9037	63.3521	52.6184	41.0744	57.9853	1.41171	0.497447	1.04819	0.0894963
AT4G35940	4.65243	3.93266	6.49834	5.62009	4.29254	6.05922	1.41157	0.497299	1.04762	0.0896139
AT5G52882	15.9704	14.6548	23.6796	19.5483	15.3126	21.614	1.41152	0.497246	0.996619	0.100782
AT3G09730	1.96504	1.61158	2.43215	2.61568	1.78831	2.52392	1.41134	0.497067	1.17982	0.066097
AT3G02170	5.80676	5.53339	9.15463	6.84892	5.67008	8.00177	1.41123	0.496951	0.739083	0.182355
AT1G67840	8.17039	7.50597	12.0621	10.0602	7.83818	11.0612	1.41119	0.496912	1.03402	0.0924649
AT2G04790	3.25022	3.16321	4.44136	4.60894	3.20672	4.52515	1.41115	0.496869	2.29341	0.00508854
AT4G38020	6.19076	7.15449	10.0801	8.75041	6.67262	9.41523	1.41102	0.496744	1.10163	0.0791359
AT1G72490	1.35558	1	1.78742	1.53634	1.17779	1.66188	1.41101	0.496733	0.806505	0.156133
AT5G04970	5.00136	5.08726	7.13156	7.10247	5.04431	7.11701	1.4109	0.496616	3.32033	0.00047827
AT3G53540	5.29207	4.21833	7.13038	6.28701	4.7552	6.70869	1.41081	0.496526	0.985027	0.103508
AT3G27831	1	1	1.13779	1.68369	1	1.41074	1.41074	0.496453	0.566554	0.271298
AT3G12990	6.05325	6.31165	8.67604	8.76576	6.18245	8.7209	1.41059	0.496299	2.53905	0.00289036
AT5G04370	1.27355	1.21997	1.75643	1.76081	1.24676	1.75862	1.41055	0.49626	2.56112	0.00274715
AT5G58595	3.17021	2.86755	5.01189	3.50419	3.01888	4.25804	1.41047	0.496174	0.604919	0.24836
AT4G04260	1.69181	1	2.26088	1.53547	1.3459	1.89817	1.41033	0.496037	0.414107	0.385384
AT4G28780	25.465	22.7104	35.9461	31.9954	24.0877	33.9708	1.41029	0.495997	1.26314	0.0545584
AT2G33850	1.49249	1.26659	1.58428	2.30637	1.37954	1.94533	1.41012	0.49582	0.563196	0.273403
AT4G31360	12.0887	12.9052	19.1868	16.0522	12.497	17.6195	1.4099	0.495594	1.05996	0.0871049
AT4G30690	20.7298	15.9084	26.6125	25.0329	18.3191	25.8227	1.4096	0.495289	1.0096	0.0978131
AT1G64600	6.08781	4.77459	8.46664	6.84393	5.4312	7.65529	1.4095	0.495185	0.77779	0.166805
AT5G04520	4.97781	5.21392	6.5879	7.77648	5.09586	7.18219	1.40942	0.495097	1.12507	0.0749781
AT2G23400	1.11917	1	1.32467	1.66172	1.05958	1.4932	1.40923	0.494908	0.866179	0.136088
AT1G12270	18.1357	16.5314	25.1645	23.6858	17.3335	24.4251	1.40913	0.494801	1.64096	0.0228579
AT1G12650	9.9242	9.03737	14.1741	12.5451	9.48078	13.3596	1.40913	0.4948	1.27833	0.052683
AT1G49620	4.08138	3.36199	5.83586	4.65264	3.72169	5.24425	1.40911	0.494779	0.798831	0.158916
AT5G10695	5.15491	6.28787	7.07787	9.04572	5.72139	8.0618	1.40906	0.494736	0.755976	0.175398
AT3G48131	1.07009	1	1.37814	1.5382	1.03504	1.45817	1.4088	0.494464	1.39698	0.0400884
AT4G21880	2.45525	2.61877	3.97789	3.1699	2.53701	3.5739	1.4087	0.494368	0.891752	0.128306
AT2G42750	9.91237	8.4183	12.6092	13.2133	9.16534	12.9112	1.4087	0.494367	1.3636	0.0432908
AT3G14415	147.616	134.705	200.309	197.361	141.16	198.835	1.40858	0.494237	1.88852	0.0129264
AT2G04030	78.3504	79.3218	118.388	103.678	78.8361	111.033	1.4084	0.494059	1.31322	0.0486159
AT2G02980	3.39392	2.17522	3.99366	3.84957	2.78457	3.92161	1.40834	0.493992	0.688131	0.205054
AT5G46440	1.50562	1.62725	3.0543	1.35734	1.56644	2.20582	1.40818	0.49383	0.275166	0.530681
AT4G36430	3.71678	4.0698	4.52945	6.43506	3.89329	5.48226	1.40813	0.49378	0.614874	0.242732
AT4G10930	3.20529	3.05282	4.92371	3.88838	3.12906	4.40604	1.40811	0.493757	0.8704	0.134772
AT4G25490	1.21299	1.23237	1.25693	2.18601	1.22268	1.72147	1.40795	0.4936	0.402988	0.395378
AT4G31850	11.4003	11.8987	17.2266	15.574	11.6495	16.4003	1.40782	0.49346	1.5023	0.0314558
AT4G20130	24.2038	22.2618	33.0251	32.3856	23.2328	32.7054	1.40772	0.493364	1.94127	0.0114479
AT2G18120	1.15411	1.82485	2.09308	2.10002	1.48948	2.09655	1.40757	0.493208	0.673665	0.211999
AT3G59370	13.9983	16.1561	19.8486	22.5957	15.0772	21.2222	1.40757	0.493202	1.14173	0.0721553
AT1G35680	229.442	220.946	304.776	329.042	225.194	316.909	1.40727	0.492898	1.71932	0.0190846
AT2G47310	2.6208	2.45116	4.06317	3.073	2.53598	3.56808	1.40698	0.492607	0.753871	0.17625
AT3G20860	3.56198	3.68499	5.45385	4.73967	3.62349	5.09676	1.40659	0.492202	1.25569	0.0555017
AT2G42360	2.3066	3.00813	3.2014	4.27254	2.65736	3.73697	1.40627	0.491873	0.631194	0.233779
AT2G48120	14.1667	14.716	20.7923	19.8068	14.4414	20.2995	1.40565	0.491239	2.0388	0.00914532
AT5G41880	6.33927	6.2195	8.17868	9.47113	6.27938	8.82491	1.40538	0.490958	1.22709	0.0592806
AT4G16890	7.23487	7.71099	10.6662	10.3368	7.47293	10.5015	1.40527	0.490844	2.04513	0.00901292
AT1G18170	14.6108	18.2219	22.633	23.5045	16.4164	23.0687	1.40523	0.490804	1.15562	0.0698836
AT5G41761	2.03376	1.58319	2.48344	2.59743	1.80847	2.54043	1.40474	0.490303	1.05684	0.0877318
AT4G01130	4.56412	3.58747	5.19845	6.25228	4.0758	5.72536	1.40472	0.490284	0.828157	0.14854
AT5G17170	34.415	35.1133	51.9883	45.664	34.7641	48.8262	1.4045	0.490056	1.32275	0.047561
AT1G59930	1	1	1.80886	1	1	1.40443	1.40443	0.489986	0.374019	0.42265
AT3G62070	1.89412	2.30366	2.64362	3.25019	2.09889	2.9469	1.40403	0.489575	0.834463	0.146399
AT1G28150	27.9817	28.6499	38.5086	40.9916	28.3158	39.7501	1.40382	0.489353	1.9063	0.0124079
AT2G03370	1.33457	1.17474	1.81654	1.70602	1.25465	1.76128	1.4038	0.489333	1.45758	0.034867
AT1G07500	1.31068	1.63266	1	3.13127	1.47167	2.06563	1.4036	0.489128	0.195933	0.636894
AT1G11290	2.49179	2.3933	3.56901	3.28699	2.44254	3.428	1.40345	0.488982	1.65347	0.022209
AT3G58720	2.44947	1.60697	2.7579	2.93504	2.02822	2.84647	1.40343	0.488958	0.704014	0.197691
AT3G47295	9.46679	8.6307	13.6448	11.7483	9.04874	12.6965	1.40313	0.488646	1.14212	0.0720916
AT1G58200	5.86737	4.73251	8.44516	6.42761	5.29994	7.43639	1.40311	0.488625	0.685724	0.206194
AT3G15110	24.9409	21.7879	34.2211	31.3277	23.3644	32.7744	1.40275	0.488259	1.31867	0.0480102
AT2G29630	18.9361	18.8652	26.6465	26.3792	18.9006	26.5128	1.40275	0.488256	3.48155	0.000329955
AT5G53700	1.4826	1.41677	1.69792	2.36844	1.44969	2.03318	1.4025	0.487999	0.647054	0.225396
AT5G45930	28.8598	29.236	38.9954	42.4809	29.0479	40.7382	1.40245	0.487946	1.66249	0.0217526
AT4G02790	28.8821	28.293	43.7929	36.3655	28.5875	40.0792	1.40198	0.487467	1.04106	0.0909789
AT1G31880	2.08917	1.70484	2.71026	2.60722	1.89701	2.65874	1.40155	0.487022	1.208	0.0619444
AT2G22540	8.20676	8.27256	11.3414	11.737	8.23966	11.5392	1.40045	0.485888	2.43515	0.00367159
AT2G40650	14.0177	12.5274	19.8848	17.2861	13.2725	18.5855	1.40029	0.48573	1.14808	0.0711089
AT4G10300	35.2597	31.9157	49.0487	45.014	33.5877	47.0314	1.40026	0.485691	1.44431	0.0359495
AT3G29240	33.9198	31.2836	42.4465	48.8449	32.6017	45.6457	1.4001	0.485531	1.19576	0.0637144
AT5G59750	3.89929	4.33344	5.96716	5.55762	4.11637	5.76239	1.39987	0.485297	1.50403	0.0313306
AT2G32650	25.748	30.6374	42.0343	36.8889	28.1927	39.4616	1.39971	0.485127	1.06294	0.0865078
AT1G10910	9.21537	9.80706	14.2022	12.4217	9.51122	13.3119	1.3996	0.485018	1.25285	0.0558657
AT4G33740	15.8413	15.6349	23.7084	20.3365	15.7381	22.0224	1.39931	0.484713	1.18541	0.0652511
AT5G18570	25.7184	27.1689	38.3579	35.6415	26.4436	36.9997	1.39919	0.484591	1.68572	0.0206197
AT5G46550	5.93581	6.49589	8.05269	9.34151	6.21585	8.6971	1.39918	0.484582	1.14464	0.0716737
AT1G51080	5.82759	6.29762	8.83722	8.12723	6.0626	8.48223	1.39911	0.484505	1.52883	0.029592
AT1G60640	7.76294	8.21865	13.4338	8.91946	7.9908	11.1766	1.39869	0.484074	0.529608	0.295387
AT5G52780	33.3272	26.8621	41.2318	42.9518	30.0947	42.0918	1.39865	0.484032	1.15672	0.0697083
AT1G78530	1.44592	1.77257	2.19509	2.30479	1.60925	2.24994	1.39813	0.483501	1.18502	0.0653094
AT5G14320	171.19	171.549	238.858	240.221	171.369	239.539	1.3978	0.483153	3.97127	0.000106839
AT5G54290	14.3737	15.3923	22.1712	19.4352	14.883	20.8032	1.39778	0.48314	1.25367	0.0557604
AT2G31018	1.70817	1	2.07476	1.70996	1.35409	1.89236	1.39752	0.482864	0.509858	0.309131
AT3G27027	2.05084	3.32868	4.38224	3.1355	2.68976	3.75887	1.39747	0.482822	0.451332	0.353727
AT2G03540	1	1.09278	1.77599	1.14845	1.04639	1.46222	1.3974	0.482743	0.494637	0.320157
AT5G53815	2.64637	1.74723	2.81668	3.32214	2.1968	3.06941	1.39722	0.482559	0.633158	0.232725
AT1G23740	54.8742	53.8277	74.7063	77.1689	54.351	75.9376	1.39717	0.482509	2.41805	0.00381901
AT5G60930	4.62264	3.78511	6.19419	5.55186	4.20387	5.87303	1.39705	0.482386	1.05997	0.087103
AT5G14770	2.54132	2.18126	3.58542	3.01123	2.36129	3.29832	1.39683	0.482157	0.959846	0.109687
AT3G47500	11.1435	11.3021	17.1744	14.1769	11.2228	15.6757	1.39677	0.482098	1.01186	0.0973062
AT1G22700	45.2146	41.139	58.8346	61.771	43.1768	60.3028	1.39665	0.481968	1.68114	0.0208382
AT1G78180	10.0129	8.48945	13.0396	12.8003	9.25115	12.9199	1.39657	0.481893	1.38256	0.0414424
AT2G24090	255.72	256.739	360.573	355.079	256.23	357.826	1.39651	0.481822	3.12184	0.000755375
AT4G18810	9.84878	10.4097	15.1375	13.1519	10.1292	14.1447	1.39642	0.481735	1.22099	0.0601189
AT5G57030	16.2335	16.307	25.0081	20.4313	16.2703	22.7197	1.39639	0.481706	0.973716	0.106239
AT5G42540	9.46625	9.41292	15.4567	10.9031	9.43958	13.1799	1.39624	0.481543	0.61589	0.242164
AT3G60880	15.4355	13.6367	20.6676	19.9227	14.5361	20.2951	1.39619	0.481496	1.56219	0.027404
AT2G29650	18.8267	20.0576	30.7662	23.5193	19.4422	27.1428	1.39608	0.481379	0.766638	0.171144
AT2G47400	723.458	732.46	1024.05	1008.37	727.959	1016.21	1.39597	0.481272	3.00786	0.000982056
AT1G30210	10.437	10.508	14.1949	15.0409	10.4725	14.6179	1.39584	0.481129	1.98615	0.010324
AT3G26813	1	1	1	1.79109	1	1.39554	1.39554	0.480828	0.374019	0.42265
AT1G18440	10.0188	8.60176	12.65	13.3343	9.31027	12.9921	1.39546	0.480743	1.36897	0.0427591
AT1G07050	2.53068	2.75808	3.42029	3.95932	2.64438	3.6898	1.39534	0.480613	1.15395	0.0701537
AT2G13975	9.7707	8.00227	12.3274	12.4634	8.88648	12.3954	1.39486	0.480121	1.23403	0.0583411
AT3G60750	314.952	303.215	442.013	420.241	309.083	431.127	1.39486	0.480118	1.99514	0.0101125
AT2G35795	15.2404	17.3656	24.1499	21.3277	16.303	22.7388	1.39476	0.480016	1.16898	0.0677665
AT3G10490	8.1187	8.15353	11.87	10.8251	8.13611	11.3476	1.39471	0.47997	1.5937	0.0254858
AT2G30432	1	1.27718	1.65712	1.51882	1.13859	1.58797	1.39468	0.479939	0.995277	0.101093
AT2G34900	8.13809	7.8783	12.6179	9.71429	8.0082	11.1661	1.39433	0.479574	0.788841	0.162614
AT2G25840	24.5958	22.2577	35.8882	29.4402	23.4268	32.6642	1.39431	0.479552	0.940765	0.114613
AT4G02560	4.78057	4.49401	7.10277	5.82481	4.63729	6.46379	1.39387	0.479098	0.966191	0.108096
AT3G50808	1	1	1.47668	1.31084	1	1.39376	1.39376	0.478982	1.38095	0.0415958
AT3G52720	12.2627	11.8131	17.0364	16.5179	12.0379	16.7772	1.3937	0.478919	2.28381	0.00520223
AT1G07901	7.0336	3.57808	8.5156	6.26904	5.30584	7.39232	1.39324	0.478447	0.378945	0.417883
AT1G74930	2.21239	1.74965	1.44444	4.07557	1.98102	2.76001	1.39322	0.478426	0.208468	0.618773
AT1G10310	14.1205	13.9477	18.9419	20.1611	14.0341	19.5515	1.39314	0.478343	1.91281	0.0122232
AT3G47690	4.68133	3.4909	6.3839	5.0011	4.08612	5.6925	1.39313	0.478333	0.656909	0.220339
AT5G63690	3.90613	3.34174	6.44982	3.64691	3.62393	5.04836	1.39306	0.478258	0.372593	0.42404
AT4G24280	108.35	110.722	160.929	144.25	109.536	152.589	1.39305	0.478249	1.44117	0.0362099
AT5G10060	9.51533	9.54214	15.2647	11.2811	9.52874	13.2729	1.39294	0.478128	0.697023	0.200899
AT5G09570	1.9072	1	1.42712	2.62193	1.4536	2.02453	1.39277	0.477954	0.278952	0.526075
AT5G23060	97.4364	92.286	128.471	135.705	94.8612	132.088	1.39243	0.477608	1.85608	0.0139292
AT1G14840	7.24751	7.34753	10.4433	9.87546	7.29752	10.1594	1.39217	0.477336	2.00016	0.0099964
AT1G20816	6.89691	4.63781	8.21242	7.8451	5.76736	8.02876	1.3921	0.477265	0.728629	0.186797
AT4G12917	1.22121	1.67126	2.22833	1.7979	1.44624	2.01312	1.39197	0.477128	0.677226	0.210268
AT5G66540	11.535	11.4771	17.3324	14.6874	11.506	16.0099	1.39144	0.476574	1.11636	0.0764961
AT2G22980	3.50017	2.35496	4.35554	3.79129	2.92756	4.07342	1.3914	0.476539	0.66859	0.214491
AT5G22300	2.58254	2.44011	3.03937	3.94899	2.51132	3.49418	1.39137	0.476507	0.77909	0.166307
AT4G01240	1.96448	2.20328	2.78406	3.0139	2.08388	2.89898	1.39115	0.476274	1.40964	0.0389371
AT1G49030	1.5017	1.44346	1.91608	2.18102	1.47258	2.04855	1.39113	0.476258	1.29049	0.0512282
AT1G26218	9.37783	7.39546	12.2247	11.1082	8.38664	11.6665	1.39108	0.476204	0.9906	0.102188
AT1G31800	24.6704	21.3264	32.4265	31.5559	22.9984	31.9912	1.39102	0.476144	1.4561	0.0349863
AT5G59080	5.16653	4.05905	7.76939	5.06331	4.61279	6.41635	1.39099	0.476113	0.465165	0.342638
AT3G26830	2.12584	1.50304	2.82766	2.2192	1.81444	2.52343	1.39075	0.475861	0.61092	0.244951
AT1G06830	11.4849	9.03835	12.2886	16.2537	10.2616	14.2711	1.39073	0.475843	0.643286	0.22736
AT5G07890	4.85763	4.69341	6.87947	6.40313	4.77552	6.6413	1.3907	0.475807	1.75085	0.0177479
AT3G27415	1.03179	1.15202	1.32541	1.71158	1.0919	1.5185	1.39069	0.475799	0.771114	0.169389
AT1G14760	2.02519	1.81203	2.42198	2.91076	1.91861	2.66637	1.38974	0.474814	0.97022	0.107098
AT2G12190	3.11662	2.56582	3.61757	4.27938	2.84122	3.94848	1.38971	0.474785	0.907515	0.123733
AT1G12770	24.6111	24.9378	35.2006	33.6551	24.7744	34.4278	1.38965	0.474723	2.17866	0.00662735
AT5G25060	10.158	8.34142	14.4174	11.2901	9.24972	12.8537	1.38964	0.474707	0.734115	0.184453
AT4G34220	12.27	12.2965	17.5706	16.5633	12.2832	17.0669	1.38945	0.474512	1.96209	0.0109123
AT3G01470	7.45277	8.25198	11.901	9.91869	7.85238	10.9098	1.38937	0.474429	0.984886	0.103541
AT5G57567	1.8912	1.37127	1.93498	2.59595	1.63124	2.26547	1.3888	0.473843	0.56784	0.270495
AT3G51270	14.9051	16.062	22.9968	20.0092	15.4836	21.503	1.38876	0.473802	1.19323	0.0640869
AT1G32160	13.6217	13.2275	19.3534	17.9284	13.4246	18.6409	1.38857	0.473595	1.71	0.0194986
AT3G28370	4.20289	4.19959	6.50905	5.15411	4.20124	5.83158	1.38806	0.473072	0.860594	0.13785
AT2G43138	1.34266	1.33505	2.22833	1.48828	1.33886	1.8583	1.38798	0.472986	0.529401	0.295528
AT3G05410	15.8298	13.3058	21.4396	18.9915	14.5678	20.2156	1.38769	0.472688	1.0718	0.0847627
AT1G16810	38.0745	37.6689	52.7957	52.3086	37.8717	52.5522	1.38764	0.47263	3.33192	0.000465669
AT2G18290	10.1761	9.89055	13.902	13.9407	10.0333	13.9214	1.38751	0.472498	2.86314	0.00137042
AT1G44575	435.596	425.804	609.493	585.588	430.7	597.54	1.38737	0.472352	2.2262	0.00594019
AT4G02200	4.30495	4.274	5.31047	6.59108	4.28947	5.95078	1.3873	0.472278	0.913565	0.122021
AT1G76810	40.3656	36.9617	56.8	50.4372	38.6636	53.6186	1.3868	0.471756	1.27106	0.0535724
AT4G09530	1	1	1.36766	1.40559	1	1.38662	1.38662	0.471577	2.62021	0.00239765
AT3G53130	8.5915	8.38699	12.5329	11.0057	8.48925	11.7693	1.38638	0.471323	1.29255	0.0509864
AT1G29460	3.42824	2.11582	4.10708	3.57861	2.77203	3.84284	1.38629	0.471231	0.569783	0.269288
AT2G35830	17.6091	16.5585	25.0312	22.3332	17.0838	23.6822	1.38624	0.471174	1.3476	0.0449159
AT5G41410	3.1529	2.46135	3.90874	3.87296	2.80713	3.89085	1.38606	0.470992	1.05207	0.0887009
AT5G63060	2.96226	3.89764	4.73026	4.77735	3.42995	4.7538	1.38597	0.470894	0.976085	0.105661
AT1G67280	55.8947	54.9547	79.8214	73.7963	55.4247	76.8089	1.38582	0.470744	1.70488	0.0197295
AT1G56050	25.874	23.8806	35.8019	33.1486	24.8773	34.4752	1.38581	0.470731	1.54345	0.0286119
AT5G26820	15.8102	12.6489	22.0764	17.3604	14.2296	19.7184	1.38573	0.47065	0.714752	0.192862
AT3G29120	5.05158	3.39958	6.07382	5.63395	4.22558	5.85388	1.38534	0.470245	0.705362	0.197078
AT5G51790	2.26591	1.69911	2.97812	2.51479	1.98251	2.74646	1.38534	0.470243	0.764083	0.172154
AT4G38225	18.3263	17.2497	24.9294	24.3512	17.788	24.6403	1.38522	0.470114	2.10467	0.00785833
AT5G67570	6.27067	6.62946	9.05936	8.80894	6.45007	8.93415	1.38513	0.470017	2.11538	0.00766685
AT4G24015	4.35032	3.2685	5.70399	4.84806	3.80941	5.27603	1.385	0.469884	0.776386	0.167346
AT3G49725	3.98377	4.29725	4.83835	6.62949	4.14051	5.73392	1.38483	0.469713	0.654096	0.221771
AT3G52220	21.1122	21.5742	30.9911	28.1191	21.3432	29.5551	1.38476	0.469632	1.52336	0.0299665
AT3G26070	30.2429	28.6707	41.7831	39.793	29.4568	40.788	1.38467	0.469544	1.91033	0.0122934
AT5G56230	2.28556	1.99134	3.42015	2.50057	2.13845	2.96036	1.38435	0.469207	0.636835	0.230762
AT5G19210	5.05448	6.22823	9.60079	6.01499	5.64136	7.80789	1.38404	0.46889	0.432255	0.369611
AT4G34730	29.1522	29.6557	40.1754	41.215	29.4039	40.6952	1.38401	0.46885	2.58399	0.00260619
AT5G16540	7.31127	6.39135	9.57966	9.38251	6.85131	9.48108	1.38384	0.468672	1.51515	0.0305387
AT5G14460	16.7154	14.8646	21.8522	21.8362	15.79	21.8442	1.38342	0.468236	1.64633	0.0225774
AT5G08450	17.8638	18.0977	27.536	22.2107	17.9807	24.8734	1.38334	0.468151	0.911452	0.122616
AT1G50620	4.69363	4.34969	6.58465	5.92276	4.52166	6.25371	1.38305	0.467858	1.36278	0.0433729
AT1G06230	10.3458	10.9436	16.9451	12.496	10.6447	14.7206	1.3829	0.467698	0.675645	0.211035
AT1G15580	1.53091	1	1.70546	1.79452	1.26546	1.74999	1.38289	0.46769	0.670309	0.213644
AT3G18100	1.65465	2.12067	2.97958	2.24118	1.88766	2.61038	1.38287	0.467661	0.620378	0.239675
AT4G12970	10.3679	9.36865	13.3126	13.9791	9.86828	13.6459	1.3828	0.467592	1.61339	0.0243563
AT4G30950	114.859	109.367	160.641	149.416	112.113	155.029	1.38279	0.467578	1.68725	0.0205472
AT5G14710	5.57645	7.89505	9.07743	9.54986	6.73575	9.31365	1.38272	0.467508	0.792656	0.161192
AT2G17780	3.16237	3.81145	4.63038	5.01183	3.48691	4.8211	1.38263	0.467414	1.14749	0.0712054
AT3G06880	4.45508	4.82168	6.46905	6.3565	4.63838	6.41278	1.38255	0.467329	1.94018	0.0114769
AT1G03760	3.43349	3.3644	5.68916	3.70891	3.39894	4.69903	1.3825	0.467277	0.495105	0.319812
AT1G19740	29.3903	32.1515	41.6458	43.4328	30.7709	42.5393	1.38245	0.46723	1.72188	0.0189722
AT4G03000	4.40209	3.92397	6.29416	5.21402	4.16303	5.75409	1.38219	0.466954	0.940849	0.114591
AT2G36150	1	1	1.20927	1.55502	1	1.38214	1.38214	0.466907	0.802336	0.157639
AT3G47860	25.1679	26.6161	37.1943	34.3763	25.892	35.7853	1.3821	0.466863	1.60741	0.0246941
AT1G74970	167.493	158.888	229.311	221.761	163.191	225.536	1.38204	0.466799	2.07968	0.00832373
AT1G29550	4.95805	4.12579	7.28412	5.26855	4.54192	6.27633	1.38187	0.466619	0.597494	0.252642
AT2G30390	17.8691	15.2979	22.1667	23.6554	16.5835	22.9111	1.38156	0.466295	1.29289	0.0509457
AT3G02060	9.34005	9.63529	13.75	12.4649	9.48767	13.1074	1.38152	0.466258	1.50016	0.031611
AT5G16400	35.5478	32.3442	48.1261	45.6661	33.946	46.8961	1.38149	0.466228	1.62954	0.0234673
AT1G79850	604.878	580.305	827.655	809.585	592.591	818.62	1.38142	0.466157	2.34468	0.00452188
AT5G20935	9.10815	7.47225	10.4264	12.4727	8.2902	11.4495	1.38109	0.46581	0.862135	0.137362
AT1G68730	11.9112	13.0608	20.5788	13.9071	12.486	17.243	1.38099	0.465699	0.529991	0.295127
AT1G76890	14.3716	11.9426	19.9731	16.3625	13.1571	18.1678	1.38084	0.465541	0.830164	0.147855
AT5G48610	3.52854	3.32691	5.71654	3.74786	3.42773	4.7322	1.38057	0.465259	0.497404	0.318124
AT1G33330	9.36249	8.93963	13.0523	12.2097	9.15106	12.631	1.38028	0.464959	1.74818	0.0178574
AT5G22390	4.24777	3.88943	5.99541	5.23556	4.0686	5.61549	1.3802	0.46488	1.17737	0.0664703
AT3G13120	199.967	187.092	275.731	258.459	193.529	267.095	1.38013	0.4648	1.68249	0.0207734
AT1G33930	2.45133	1.52776	2.99968	2.49158	1.98954	2.74563	1.38003	0.464699	0.540812	0.287864
AT2G41150	2.71653	2.77945	4.00733	3.576	2.74799	3.79167	1.37979	0.464454	1.38776	0.0409483
AT5G22040	6.38123	6.07722	9.42848	7.75826	6.22923	8.59337	1.37952	0.46417	0.965133	0.10836
AT1G35340	12.1951	10.7783	16.9038	14.7853	11.4867	15.8445	1.37938	0.464022	1.11979	0.0758949
AT3G54720	5.13094	5.06743	7.13411	6.92606	5.09918	7.03008	1.37867	0.463276	2.50061	0.00315781
AT2G17880	4.58527	5.10438	6.67252	6.68407	4.84483	6.67829	1.37844	0.463035	1.71069	0.0194674
AT2G29340	14.5646	12.5103	17.7594	19.5607	13.5374	18.6601	1.3784	0.462998	1.19156	0.0643344
AT3G60500	9.92501	7.72779	12.5357	11.7963	8.8264	12.166	1.37836	0.462957	0.99006	0.102315
AT4G30825	9.52157	7.70434	11.5868	12.1564	8.61295	11.8716	1.37834	0.462932	1.1203	0.0758053
AT5G24314	70.6525	81.3811	103.346	106.197	76.0168	104.772	1.37827	0.462858	1.45226	0.0352975
AT5G27200	2.16996	1.13065	2.85794	1.69113	1.6503	2.27454	1.37825	0.46284	0.294043	0.508109
AT2G46200	3.16818	3.43278	4.28695	4.81082	3.30048	4.54888	1.37825	0.462835	1.29193	0.0510591
AT1G08530	5.73455	6.92223	8.72391	8.71972	6.32839	8.72181	1.3782	0.46279	1.2487	0.0564029
AT1G33640	1	1	1	1.75603	1	1.37802	1.37802	0.462594	0.374019	0.42265
AT2G37980	1.77446	1.79157	2.75634	2.15726	1.78301	2.4568	1.37789	0.462466	0.813864	0.15351
AT1G26920	18.7328	17.2798	25.4291	24.1825	18.0063	24.8058	1.37762	0.462175	1.71557	0.01925
AT3G62030	316.365	310.626	419.356	444.379	313.496	431.867	1.37759	0.462143	1.93722	0.0115553
AT5G30510	157.517	165.51	222.596	222.29	161.514	222.443	1.37724	0.46178	2.36841	0.00428139
AT2G03390	15.5357	14.0934	21.9966	18.8087	14.8146	20.4026	1.3772	0.461741	1.06746	0.085613
AT5G18750	3.22414	3.0003	4.47658	4.09417	3.11222	4.28538	1.37695	0.461478	1.47026	0.0338643
AT1G24575	1.74302	1.77783	2.40927	2.43877	1.76043	2.42402	1.37695	0.461476	2.92813	0.00117997
AT4G35760	16.6212	15.0968	21.3252	22.3447	15.859	21.835	1.37682	0.461342	1.64314	0.0227435
AT2G18300	12.4365	10.6503	17.5863	14.1987	11.5434	15.8925	1.37676	0.461279	0.82071	0.151109
AT1G75120	5.59622	4.4672	7.72553	6.12862	5.03171	6.92707	1.37668	0.461197	0.716321	0.192167
AT2G24650	3.64883	3.73443	5.80343	4.35991	3.69163	5.08167	1.37654	0.461044	0.711153	0.194467
AT1G12530	9.08018	7.6389	12.9124	10.0996	8.35954	11.506	1.37639	0.460887	0.733476	0.184724
AT4G34190	135.678	140.844	181.897	198.695	138.261	190.296	1.37635	0.460852	1.56304	0.0273503
AT1G52220	105.723	93.009	133.426	140.098	99.3661	136.762	1.37634	0.46084	1.4567	0.0349381
AT4G32590	24.0768	23.2135	30.7878	34.2983	23.6451	32.5431	1.37631	0.460807	1.41032	0.0388759
AT2G33790	49.4603	51.6154	75.7386	63.3724	50.5379	69.5555	1.3763	0.4608	1.02763	0.0938369
AT3G56300	2.08464	1.78457	2.84581	2.47854	1.9346	2.66218	1.37608	0.460567	1.03701	0.0918317
AT5G52520	28.8018	30.2446	43.1685	38.082	29.5232	40.6253	1.37605	0.460529	1.28157	0.0522919
AT1G76470	1.65864	1.91808	2.26502	2.65632	1.78836	2.46067	1.37593	0.46041	0.985654	0.103359
AT5G55040	11.1966	10.4792	16.5272	13.2964	10.8379	14.9118	1.3759	0.460372	0.87656	0.132874
AT1G16080	39.3528	42.9445	57.5602	55.6661	41.1486	56.6132	1.37582	0.460294	1.77463	0.0168023
AT1G36320	29.5964	30.2611	42.2292	40.1174	29.9288	41.1733	1.37571	0.460178	2.01987	0.00955289
AT1G07320	261.928	244.636	348.291	348.561	253.282	348.426	1.37565	0.460109	2.08837	0.00815885
AT5G43870	5.93412	4.8969	6.74506	8.15334	5.41551	7.4492	1.37553	0.459988	0.836876	0.145588
AT1G62740	14.6811	13.4695	20.1459	18.5747	14.0753	19.3603	1.37548	0.459937	1.47525	0.0334775
AT2G17036	1.45556	1.25381	2.1358	1.5906	1.35469	1.8632	1.37537	0.459823	0.653032	0.222314
AT3G07050	28.9974	29.7687	41.5576	39.2676	29.383	40.4126	1.37537	0.459822	1.9286	0.011787
AT1G11240	21.9935	23.4584	32.5633	29.9483	22.726	31.2558	1.37533	0.459783	1.53002	0.0295105
AT3G25570	2.77677	2.8897	3.57513	4.21771	2.83324	3.89642	1.37525	0.459698	1.08281	0.0826393
AT5G47840	46.2135	39.127	63.0206	54.3284	42.6703	58.6745	1.37507	0.459503	0.98311	0.103966
AT2G20890	135.814	133.828	184.772	185.983	134.821	185.377	1.37498	0.459416	3.27665	0.000528873
AT5G58570	1.63268	1.40856	2.09231	2.08872	1.52062	2.09051	1.37478	0.459197	1.43692	0.0365666
AT1G19720	11.4944	10.5429	16.3708	13.9224	11.0187	15.1466	1.37463	0.459044	1.05518	0.0880679
AT4G02655	1	1.06063	1.13695	1.69546	1.03031	1.41621	1.37454	0.458948	0.518244	0.303219
AT5G08410	37.2853	33.9532	47.5764	50.337	35.6192	48.9567	1.37445	0.458849	1.59655	0.0253191
AT2G33175	1.02954	1.00989	1.48761	1.31525	1.01972	1.40143	1.37433	0.458732	1.31923	0.0479482
AT3G09670	3.52721	3.6304	4.84628	4.98923	3.5788	4.91776	1.37413	0.458523	2.36587	0.00430652
AT1G06510	9.24458	6.94918	12.0253	10.2265	8.09688	11.1259	1.37409	0.458481	0.761019	0.173373
AT1G07600	11.2412	14.8925	19.9138	15.9956	13.0669	17.9547	1.37406	0.458448	0.67879	0.209513
AT5G16730	13.9217	12.0588	18.7977	16.8999	12.9902	17.8488	1.37402	0.458399	1.17129	0.067408
AT3G50480	2.10019	1.56942	2.53628	2.50555	1.83481	2.52092	1.37394	0.458323	0.910038	0.123016
AT5G02150	5.42852	4.41636	6.82081	6.70291	4.92244	6.76186	1.37368	0.458048	1.16185	0.0688894
AT1G15830	3.33565	3.14591	4.3426	4.56079	3.24078	4.4517	1.37365	0.458015	1.85522	0.0139567
AT5G48600	4.97509	5.0179	7.65852	6.06522	4.9965	6.86187	1.37334	0.457686	0.841356	0.144093
AT2G29580	4.85887	6.03401	8.08512	6.87405	5.44644	7.47959	1.3733	0.457645	0.861505	0.137561
AT4G22753	3.82224	2.72376	4.14903	4.83941	3.273	4.49422	1.37312	0.457457	0.697951	0.20047
AT2G26270	3.49847	2.86224	4.18159	4.55228	3.18036	4.36694	1.3731	0.457433	1.07427	0.0842807
AT5G51810	1.94037	2.1233	2.75098	2.82859	2.03184	2.78978	1.37304	0.45737	1.77594	0.0167518
AT4G24570	8.3811	10.7069	5.64987	20.5534	9.544	13.1017	1.37276	0.457084	0.165207	0.683585
AT2G18969	3.3463	1.93596	4.03716	3.21376	2.64113	3.62546	1.37269	0.45701	0.45433	0.351293
AT4G00380	3.60978	3.63116	5.08059	4.85897	3.62047	4.96978	1.37269	0.457006	2.17145	0.00673832
AT3G45260	3.33412	3.02422	5.06751	3.66026	3.17917	4.36388	1.37265	0.456961	0.616478	0.241837
AT5G57410	5.97346	6.74263	8.56036	8.89417	6.35804	8.72727	1.37263	0.456947	1.52412	0.0299143
AT1G18060	41.7616	38.3104	51.9467	57.9624	40.036	54.9546	1.37263	0.456942	1.30094	0.0500101
AT4G30620	27.2147	29.7253	38.2262	39.9265	28.47	39.0764	1.37255	0.456854	1.70273	0.0198277
AT2G44430	7.57009	7.26112	11.1545	9.20092	7.41561	10.1777	1.37247	0.456775	0.967199	0.107845
AT3G26610	2.07228	2.05387	2.50698	3.15354	2.06308	2.83026	1.37186	0.456137	0.850603	0.141058
AT3G63440	2.34757	2.58855	3.89953	2.87208	2.46806	3.38581	1.37185	0.456122	0.649524	0.224118
AT5G42770	6.14148	7.57631	8.64631	10.1681	6.85889	9.40721	1.37154	0.455791	0.869322	0.135107
AT5G14260	37.6256	33.1408	49.8984	47.1487	35.3832	48.5236	1.37137	0.455621	1.42238	0.0378111
AT4G31390	5.60889	5.54811	8.17509	7.12488	5.5785	7.64999	1.37133	0.45558	1.23033	0.0588402
AT2G33430	99.1225	104.159	141.525	137.239	101.641	139.382	1.37132	0.455561	2.11975	0.00759016
AT3G60180	5.52032	4.69094	8.17359	5.82895	5.10563	7.00127	1.37128	0.455528	0.573673	0.266887
AT3G50751	1.02094	1	1.12057	1.6506	1.01047	1.38558	1.37123	0.455468	0.533331	0.292866
AT5G66080	3.50606	4.17347	6.17841	4.35161	3.83976	5.26501	1.37118	0.455419	0.552246	0.280385
AT4G17000	3.39708	2.5524	4.33296	3.82467	2.97474	4.07881	1.37115	0.455387	0.811265	0.154431
AT1G70860	3.84055	3.52715	6.62181	3.48024	3.68385	5.05102	1.37112	0.45536	0.320803	0.477746
AT1G28940	1.33315	1	1.92147	1.27751	1.16657	1.59949	1.3711	0.455333	0.449982	0.354828
AT4G25290	6.51849	5.41668	8.75312	7.60682	5.96758	8.17997	1.37073	0.454949	0.964543	0.108507
AT1G48970	5.49528	5.15281	7.46382	7.13124	5.32405	7.29753	1.37067	0.454885	1.8442	0.0143153
AT2G25510	4.6146	2.9934	5.35384	5.07353	3.804	5.21369	1.37058	0.454788	0.640679	0.228729
AT1G31750	2.60445	2.29869	4.23459	2.48488	2.45157	3.35974	1.37044	0.454642	0.382941	0.414056
AT5G47590	1.70499	1.55826	2.06571	2.40603	1.63163	2.23587	1.37033	0.454525	1.08322	0.0825618
AT1G32990	180.476	170.911	257.289	224.215	175.694	240.752	1.3703	0.454487	1.19774	0.0634251
AT4G01600	4.01564	3.38527	5.67059	4.4696	3.70046	5.0701	1.37013	0.45431	0.742642	0.180867
AT1G79600	19.9793	18.9204	27.7218	25.5738	19.4498	26.6478	1.37008	0.454259	1.57554	0.0265743
AT2G13580	1.38524	1.29034	2.06625	1.59947	1.33779	1.83286	1.37007	0.454247	0.76144	0.173205
AT3G09310	1.42625	3.0323	3.62147	2.48605	2.22928	3.05376	1.36984	0.454012	0.309758	0.490052
AT1G70070	10.1977	10.9183	14.8304	14.0951	10.558	14.4628	1.36984	0.454008	1.77116	0.0169373
AT1G68430	4.63733	3.30135	5.18994	5.68425	3.96934	5.4371	1.36977	0.453938	0.755767	0.175482
AT1G50603	1	1	1.462	1.27751	1	1.36975	1.36975	0.453917	1.24434	0.0569723
AT3G18870	4.55934	5.5466	6.99729	6.84334	5.05297	6.92032	1.36955	0.453707	1.18903	0.0647092
AT5G20380	7.65374	6.96331	12.2962	7.72261	7.30852	10.0094	1.36955	0.453706	0.439789	0.363254
AT3G56290	9.55981	7.42745	12.4405	10.8215	8.49363	11.631	1.36938	0.453524	0.842243	0.143799
AT2G02070	11.5525	9.92286	16.2701	13.1288	10.7377	14.6995	1.36896	0.453081	0.810997	0.154527
AT4G15820	4.82626	4.55107	7.33227	5.50491	4.68866	6.41859	1.36896	0.45308	0.694528	0.202056
AT2G28950	37.0231	37.1381	50.516	51.0017	37.0806	50.7589	1.36888	0.452994	3.47802	0.000332642
AT5G23080	4.7284	4.6087	6.50473	6.2723	4.66855	6.38852	1.36842	0.452506	2.24209	0.0057268
AT5G54569	2.02075	2.15163	2.93139	2.77804	2.08619	2.85471	1.36838	0.452473	1.77538	0.0167735
AT1G31355	2.60913	2.14311	3.06973	3.43173	2.37612	3.25073	1.36808	0.452157	1.0112	0.0974534
AT3G18217	2.23775	1.71013	4.3107	1.08914	1.97394	2.69992	1.36778	0.451839	0.154912	0.699984
AT3G54670	6.12429	6.26029	9.1246	7.81444	6.19229	8.46952	1.36775	0.451807	1.12828	0.0744258
AT2G42975	5.22777	5.93718	5.78865	9.4813	5.58247	7.63497	1.36767	0.451719	0.410121	0.388937
AT3G19220	13.6994	12.9734	18.9592	17.5199	13.3364	18.2395	1.36765	0.451701	1.58546	0.0259743
AT5G45020	3.90834	3.48516	4.85267	5.25893	3.69675	5.0558	1.36764	0.451684	1.36093	0.0435582
AT4G20340	4.83333	5.16399	8.05485	5.61513	4.99866	6.83499	1.36736	0.451397	0.56179	0.27429
AT1G03055	1.70115	1.42742	2.44168	1.83589	1.56429	2.13879	1.36726	0.451286	0.645793	0.226051
AT2G39175	1	1	1.73386	1	1	1.36693	1.36693	0.450939	0.374019	0.42265
AT5G09345	1.1183	1.63405	1.23252	2.5296	1.37617	1.88106	1.36688	0.450885	0.263926	0.544595
AT3G10970	27.5879	24.7597	38.921	32.6312	26.1738	35.7761	1.36686	0.45087	0.965008	0.108391
AT3G18110	7.31807	7.30869	10.7781	9.21373	7.31338	9.99589	1.3668	0.450797	1.12196	0.0755169
AT3G51600	345.021	311.525	437.946	459.408	328.273	448.677	1.36678	0.450782	1.58133	0.0262224
AT1G65010	11.9695	11.462	17.108	14.9123	11.7157	16.0101	1.36655	0.450536	1.20435	0.0624669
AT3G50685	67.2982	59.5692	82.07	91.288	63.4337	86.679	1.36645	0.450433	1.21538	0.0608998
AT1G36640	1	1	1.35142	1.38127	1	1.36634	1.36634	0.450322	2.78126	0.00165476
AT2G26550	15.5776	15.5155	22.3582	20.1245	15.5465	21.2414	1.36631	0.450285	1.43884	0.0364046
AT4G34090	10.1642	9.03797	12.3416	13.8939	9.6011	13.1178	1.36628	0.450252	1.17413	0.0669681
AT5G44785	13.3791	12.1082	19.0788	15.7392	12.7436	17.409	1.3661	0.450058	0.918376	0.120677
AT4G24175	8.8914	8.00937	12.5409	10.5468	8.45039	11.5438	1.36607	0.450033	0.9788	0.105002
AT1G53670	35.5312	24.7932	41.6092	40.7976	30.1622	41.2034	1.36606	0.450019	0.752549	0.176787
AT1G62590	2.63736	2.48141	3.35577	3.63642	2.55938	3.49609	1.36599	0.449947	1.55071	0.0281378
AT3G58220	5.56649	6.2178	7.68797	8.40718	5.89215	8.04758	1.36581	0.449761	1.32689	0.0471097
AT1G05030	3.49911	4.51564	6.19098	4.75565	4.00737	5.47331	1.36581	0.449759	0.624423	0.237453
AT3G07280	4.09579	4.36731	5.77216	5.78624	4.23155	5.7792	1.36574	0.449684	2.11762	0.00762751
AT4G04470	8.99803	9.28599	12.861	12.1088	9.14201	12.4849	1.36566	0.449603	1.84762	0.0142031
AT3G06750	12.2224	10.4242	13.7236	17.2036	11.3233	15.4636	1.36565	0.449585	0.772511	0.168845
AT5G14660	32.3141	26.1754	39.5729	40.3025	29.2447	39.9377	1.36564	0.449574	1.12867	0.0743591
AT5G57350	9.43492	9.18934	11.731	13.7022	9.31213	12.7166	1.36559	0.449527	1.12153	0.0755907
AT3G09150	9.02056	7.60867	13.164	9.54444	8.31461	11.3542	1.36557	0.449508	0.588187	0.258115
AT4G19720	2.69331	2.63701	3.55805	3.72065	2.66516	3.63935	1.36553	0.44946	2.11298	0.00770933
AT2G31070	6.17481	6.16315	8.9245	7.92314	6.16898	8.42382	1.36551	0.449443	1.33781	0.0459395
AT5G50930	2.6164	2.54309	4.12464	2.91976	2.57974	3.5222	1.36533	0.44925	0.587039	0.258798
AT2G31900	1.7268	1.6678	2.50669	2.12803	1.6973	2.31736	1.36532	0.44924	1.07734	0.0836868
AT4G28590	7.23044	5.59172	9.2252	8.28115	6.41108	8.75317	1.36532	0.449239	0.880783	0.131588
AT2G32500	6.02278	5.24551	8.52657	6.85304	5.63415	7.6898	1.36486	0.448749	0.807678	0.155712
AT5G08010	5.48267	5.47118	7.96061	6.98975	5.47693	7.47518	1.36485	0.448742	1.26549	0.0542633
AT2G30500	12.3325	13.7262	17.8089	17.7537	13.0294	17.7813	1.36471	0.448594	1.68053	0.0208674
AT1G74870	1.86409	1.5276	2.4974	2.13114	1.69584	2.31427	1.36467	0.448556	0.883617	0.130732
AT5G59240	5.5822	6.12203	7.23344	8.73803	5.85211	7.98574	1.36459	0.448468	0.934272	0.11634
AT5G66055	20.6443	21.1625	29.8796	27.1683	20.9034	28.5239	1.36456	0.448436	1.50485	0.0312716
AT1G20920	14.2849	13.5213	19.8484	18.0941	13.9031	18.9712	1.36453	0.448408	1.4707	0.0338296
AT2G16860	15.4919	15.0704	20.658	21.0451	15.2811	20.8516	1.36453	0.448402	2.58037	0.00262801
AT1G11720	7.75969	9.0478	11.5973	11.3369	8.40375	11.4671	1.36452	0.448396	1.36593	0.0430592
AT1G74640	15.0942	14.3257	20.5156	19.625	14.7099	20.0703	1.3644	0.448271	1.92718	0.0118255
AT1G65560	3.04301	3.12419	4.12353	4.29083	3.0836	4.20718	1.36437	0.448239	2.16888	0.00677828
AT3G59780	43.0018	38.458	58.417	52.7221	40.7299	55.5696	1.36434	0.448206	1.25722	0.055307
AT5G48485	28.4636	19.6866	32.5814	33.1036	24.0751	32.8425	1.36417	0.448021	0.734509	0.184286
AT1G67870	46.5296	46.631	64.1833	62.8882	46.5803	63.5357	1.364	0.447848	2.83434	0.0014644
AT5G65170	2.14889	2.42545	3.75503	2.48432	2.28717	3.11968	1.36399	0.447836	0.482999	0.328853
AT3G07210	3.78268	3.93012	5.72808	4.79063	3.8564	5.25935	1.3638	0.447631	1.00932	0.0978775
AT5G16260	9.0566	6.48526	10.2165	10.9791	7.77093	10.5978	1.36377	0.447605	0.770649	0.169571
AT4G30680	5.96021	6.14018	9.00563	7.4946	6.0502	8.25012	1.36361	0.447433	0.992697	0.101696
AT3G19810	17.6852	17.4412	24.1451	23.7535	17.5632	23.9493	1.36361	0.447432	2.88519	0.0013026
AT4G15953	1.55842	1.67347	3.10799	1.29892	1.61594	2.20345	1.36357	0.44739	0.234085	0.58333
AT1G53620	1	1.40332	2.11098	1.16583	1.20166	1.63841	1.36345	0.447264	0.314406	0.484835
AT3G05350	13.5209	13.6969	19.9036	17.2056	13.6089	18.5546	1.36342	0.447229	1.17224	0.0672606
AT5G66030	10.3887	10.5288	15.8161	12.703	10.4588	14.2596	1.36341	0.447216	0.870062	0.134877
AT5G18660	47.0807	57.8952	70.6019	72.5038	52.4879	71.5529	1.36323	0.447024	1.13159	0.0738596
AT5G13120	72.9948	72.1522	101.772	96.0847	72.5735	98.9286	1.36315	0.446945	1.93215	0.0116908
AT1G58025	7.08956	5.9195	9.97136	7.76131	6.50453	8.86634	1.3631	0.446893	0.70007	0.199494
AT2G20410	3.0789	3.25707	5.26871	3.367	3.16798	4.31786	1.36297	0.446751	0.453775	0.351743
AT4G22020	4.22669	3.75439	5.55954	5.31688	3.99054	5.43821	1.36278	0.446548	1.49449	0.0320267
AT4G21192	7.1184	4.99056	7.45617	9.04131	6.05448	8.24874	1.36242	0.446171	0.61986	0.239961
AT3G12380	5.51203	5.22546	7.96572	6.66173	5.36874	7.31372	1.36228	0.446022	0.998371	0.100376
AT5G56780	3.59257	2.79639	4.45903	4.24302	3.19448	4.35103	1.36205	0.445776	0.970046	0.107141
AT5G54180	6.99507	6.50179	10.257	8.12579	6.74843	9.19138	1.362	0.44573	0.809328	0.155121
AT3G42806	2.79215	2.70062	3.87958	3.60007	2.74639	3.73983	1.36173	0.445436	1.67329	0.0212184
AT2G36792	1.90627	1.68912	1.93248	2.96339	1.79769	2.44793	1.36171	0.445417	0.465451	0.342412
AT5G59970	77.9544	83.9164	108.28	112.139	80.9354	110.209	1.36169	0.445402	1.84172	0.0143974
AT4G18395	1	1.06446	1.39302	1.41811	1.03223	1.40556	1.36167	0.44538	2.07191	0.00847409
AT5G35970	15.6828	14.0103	21.2204	19.2078	14.8465	20.2141	1.36154	0.445236	1.26282	0.0545979
AT3G18750	4.20665	4.50032	6.11841	5.73576	4.35348	5.92708	1.36146	0.445152	1.64412	0.0226925
AT4G24350	10.2377	7.00243	12.8936	10.5765	8.62009	11.735	1.36136	0.445046	0.588469	0.257947
AT3G01660	3.6175	3.14287	4.84602	4.35693	3.38019	4.60147	1.36131	0.444992	1.15614	0.0698003
AT1G21770	22.7302	23.8373	33.1815	30.1959	23.2837	31.6887	1.36098	0.444646	1.46776	0.0340597
AT5G67270	8.51101	8.94719	12.0819	11.6735	8.7291	11.8777	1.3607	0.444348	2.05134	0.00888514
AT4G38160	23.2388	21.4357	30.2288	30.5564	22.3373	30.3926	1.36062	0.444266	1.8964	0.012694
AT5G48250	6.75111	6.77644	9.3849	9.02007	6.76377	9.20248	1.36055	0.444195	2.25377	0.00557478
AT1G71200	2.09604	3.02829	3.5022	3.46963	2.56217	3.48591	1.36053	0.444173	0.730078	0.186175
AT2G46220	22.1488	17.7303	26.7741	27.4731	19.9396	27.1236	1.36029	0.443915	1.07165	0.0847901
AT3G12730	1.98273	1.51509	2.39402	2.36393	1.74891	2.37897	1.36026	0.443883	0.939543	0.114936
AT2G23820	12.0417	14.043	18.6785	16.8035	13.0424	17.741	1.36026	0.44388	1.12128	0.0756349
AT2G01110	36.3761	31.9128	48.1153	44.7625	34.1445	46.4389	1.36007	0.443682	1.31992	0.0478714
AT1G69523	2.8056	2.62115	4.25202	3.12793	2.71338	3.68997	1.35992	0.443521	0.641025	0.228547
AT4G34610	8.19872	7.45133	11.2881	9.9893	7.82502	10.6387	1.35958	0.443156	1.19274	0.0641597
AT3G06455	2.83353	2.96232	3.84045	4.03843	2.89793	3.93944	1.3594	0.442968	1.89919	0.0126129
AT1G63030	1.24403	1	1	2.05033	1.12201	1.52517	1.35931	0.442875	0.273617	0.532578
AT1G18370	5.26809	6.01727	8.56576	6.77269	5.64269	7.66922	1.35914	0.442699	0.763644	0.172328
AT2G05647	1	1	1.71795	1	1	1.35898	1.35898	0.442522	0.374019	0.42265
AT3G32930	39.0105	37.5387	54.0714	49.9559	38.2746	52.0137	1.35896	0.442505	1.61298	0.0243793
AT1G03830	4.22771	3.59083	5.87879	4.74629	3.90927	5.31254	1.35896	0.442501	0.786843	0.163364
AT2G40400	22.6585	21.9736	32.9326	27.7081	22.316	30.3204	1.35868	0.442206	1.02962	0.0934079
AT2G22810	1.29625	1.16287	1.87895	1.46174	1.22956	1.67034	1.35849	0.442002	0.740413	0.181797
AT5G66658	1.5908	1.83128	1.8845	2.76427	1.71104	2.32439	1.35846	0.441977	0.507451	0.310849
AT1G67792	2.85693	2.73515	4.01951	3.57703	2.79604	3.79827	1.35844	0.441956	1.31312	0.0486275
AT3G01860	8.02552	9.34864	11.1893	12.4115	8.68708	11.8004	1.35839	0.441893	1.12811	0.074454
AT5G24880	1.94284	2.40892	3.27678	2.63422	2.17588	2.9555	1.3583	0.441802	0.724797	0.188453
AT2G41342	1.18456	1.33365	1.85457	1.56546	1.25911	1.71001	1.35811	0.441605	0.961757	0.109205
AT1G32540	7.51233	8.66698	11.7184	10.2542	8.08966	10.9863	1.35807	0.441557	1.04647	0.0898527
AT4G19060	5.53258	6.76145	9.71744	6.97696	6.14702	8.3472	1.35793	0.441406	0.552066	0.280501
AT3G56010	34.968	33.334	47.6277	45.1202	34.151	46.3739	1.35791	0.441384	1.83386	0.0146603
AT1G76050	10.4768	8.86713	14.0213	12.2452	9.67194	13.1332	1.35787	0.441344	0.991848	0.101895
AT5G24060	11.6196	12.8034	18.6522	14.5099	12.2115	16.5811	1.35783	0.441298	0.745505	0.179678
AT5G11070	10.5841	15.2573	15.1112	19.9768	12.9207	17.544	1.35782	0.441292	0.51705	0.304053
AT1G73850	2.06716	2.06669	2.92154	2.69053	2.06693	2.80604	1.35759	0.441046	1.6278	0.0235614
AT5G57120	34.5495	31.5916	46.4416	43.3428	33.0705	44.8922	1.35747	0.440919	1.50452	0.0312956
AT1G35513	2.29083	1.90784	2.58096	3.11837	2.09934	2.84966	1.35741	0.440858	0.821527	0.150825
AT1G74040	10.0509	9.15504	13.7886	12.2808	9.60299	13.0347	1.35736	0.440803	1.22527	0.0595294
AT2G07340	25.6507	23.6597	31.6224	35.3085	24.6552	33.4655	1.35734	0.44078	1.28277	0.0521471
AT4G29000	3.28013	3.27485	4.87111	4.02524	3.27749	4.44817	1.35719	0.440622	0.960593	0.109498
AT4G15110	23.8315	23.8738	34.3702	30.3519	23.8527	32.361	1.3567	0.440106	1.28821	0.0514976
AT2G03070	5.94162	5.51244	9.15713	6.3791	5.72703	7.76812	1.35639	0.439777	0.547322	0.283582
AT3G23930	2.52021	2.5941	3.67529	3.26093	2.55716	3.46811	1.35624	0.439609	1.30589	0.0494441
AT3G15570	8.099	8.79539	11.7756	11.1369	8.4472	11.4563	1.35622	0.439591	1.62381	0.023779
AT4G23200	1.33246	1	1.56321	1.60006	1.16623	1.58163	1.35619	0.439563	0.882756	0.130992
AT4G04370	2.70691	1.9405	3.45515	2.84753	2.32371	3.15134	1.35617	0.439536	0.633308	0.232644
AT2G20960	10.5131	10.8057	13.5267	15.3814	10.6594	14.4541	1.356	0.439353	1.25101	0.0561036
AT4G11175	34.4092	33.6733	47.5956	44.7225	34.0412	46.1591	1.35598	0.439331	1.83424	0.0146473
AT1G15200	26.0273	23.9043	37.104	30.5894	24.9658	33.8467	1.35572	0.439062	0.913138	0.122141
AT2G14220	2.338	1.71689	2.72055	2.77628	2.02745	2.74841	1.3556	0.438936	0.832953	0.146909
AT1G65032	4.1807	4.19997	5.91758	5.44273	4.19034	5.68015	1.35554	0.438864	1.61069	0.0245079
AT1G05680	6.47542	7.12657	9.36519	9.07226	6.801	9.21872	1.3555	0.438821	1.6754	0.0211155
AT1G32200	21.9141	22.6663	33.8554	26.5677	22.2902	30.2116	1.35538	0.438693	0.787572	0.16309
AT1G53510	11.7493	12.4541	18.7465	14.0577	12.1017	16.4021	1.35535	0.438668	0.674989	0.211354
AT4G25560	1.57073	1.2411	2.09943	1.71156	1.40591	1.9055	1.35535	0.438661	0.724362	0.188642
AT4G20360	526.638	523.991	698.497	725.416	525.315	711.957	1.3553	0.438608	2.28319	0.00520969
AT4G11420	40.6894	37.4224	56.4679	49.3663	39.0559	52.9171	1.35491	0.438193	1.14794	0.0711308
AT3G49680	54.8893	52.7839	74.8828	70.9996	53.8366	72.9412	1.35486	0.438147	1.88264	0.0131027
AT3G01330	3.65357	4.40907	5.83742	5.08607	4.03132	5.46174	1.35483	0.438111	0.93844	0.115228
AT4G17520	139.563	137.361	193.168	182.017	138.462	187.592	1.35483	0.43811	1.88217	0.0131169
AT1G64572	6.03718	7.74635	9.97594	8.69785	6.89176	9.3369	1.35479	0.43807	0.826734	0.149027
AT3G11670	6.32123	8.09395	9.85122	9.67582	7.20759	9.76352	1.35462	0.437884	0.987108	0.103013
AT5G63420	9.67687	9.84437	14.3982	12.0422	9.76062	13.2202	1.35444	0.437702	1.0024	0.0994491
AT2G20590	2.56587	2.85264	4.2932	3.04492	2.70925	3.66906	1.35427	0.437515	0.564353	0.272676
AT5G49930	5.97126	5.1986	8.42934	6.69693	5.58493	7.56313	1.3542	0.437445	0.76366	0.172322
AT5G42880	3.87265	4.09515	5.31361	5.47524	3.9839	5.39443	1.35406	0.437289	2.02826	0.00937
AT1G65470	5.66838	5.49843	7.90357	7.21682	5.5834	7.56019	1.35405	0.437278	1.51484	0.0305602
AT5G50361	1	1	1.70774	1	1	1.35387	1.35387	0.437087	0.374019	0.42265
AT1G50900	93.973	89.5584	126.435	122.026	91.7657	124.23	1.35378	0.436989	2.04054	0.0091087
AT3G12250	4.65765	3.53735	5.70761	5.38599	4.0975	5.5468	1.3537	0.436912	0.883641	0.130725
AT5G53770	6.53571	5.63204	8.91465	7.55601	6.08388	8.23533	1.35363	0.436836	0.925436	0.118731
AT5G64572	1.28887	1.15831	1.66199	1.65044	1.22359	1.65621	1.35357	0.43677	1.6539	0.0221871
AT1G64628	2.85936	2.15334	3.71635	3.0675	2.50635	3.39193	1.35333	0.436515	0.686126	0.206003
AT5G16715	16.84	15.2703	23.7072	19.7449	16.0552	21.7261	1.35321	0.436389	0.932017	0.116945
AT3G13490	21.0764	23.3123	30.7372	29.3275	22.1943	30.0324	1.35316	0.436328	1.56428	0.027272
AT3G15030	15.9921	16.7534	23.2384	21.0644	16.3728	22.1514	1.35294	0.4361	1.42596	0.0375012
AT5G47600	2.89775	4.30025	5.45006	4.2877	3.599	4.86888	1.35284	0.435992	0.525882	0.297932
AT5G46390	6.9885	6.37175	9.8471	8.2268	6.68012	9.03695	1.35281	0.435961	0.947535	0.112841
AT3G06120	2.93816	1.70284	2.76862	3.50972	2.3205	3.13917	1.3528	0.435948	0.427647	0.373553
AT4G26701	1	1	1.17224	1.53328	1	1.35276	1.35276	0.435905	0.721486	0.189895
AT1G19950	2.69978	3.4444	4.15067	4.15946	3.07209	4.15507	1.35252	0.435651	0.997098	0.100671
AT5G63310	228.879	224.337	316.728	296.239	226.608	306.484	1.35248	0.435609	1.77406	0.0168243
AT2G03350	17.4441	13.6976	21.9231	20.191	15.5709	21.0571	1.35234	0.435455	0.931236	0.117156
AT3G20440	7.55781	6.15851	9.84148	8.7076	6.85816	9.27454	1.35234	0.435454	0.938	0.115345
AT1G63970	32.2264	31.7907	44.9152	41.6501	32.0086	43.2827	1.35222	0.435332	1.6844	0.0206823
AT5G52010	20.987	20.1956	28.7495	26.932	20.5913	27.8408	1.35206	0.435164	1.74032	0.0181838
AT4G16780	5.04556	4.94925	7.14545	6.36628	4.9974	6.75587	1.35188	0.434963	1.33354	0.0463936
AT1G17310	1.15719	1.12833	1.57739	1.51131	1.14276	1.54435	1.35143	0.434483	2.09893	0.00796292
AT4G16980	174.642	162.82	247.104	208.943	168.731	228.024	1.3514	0.43446	1.01222	0.0972261
AT5G13950	9.95694	9.46492	15.1377	11.1069	9.71093	13.1223	1.35129	0.434339	0.629042	0.234941
AT3G61080	9.0844	7.73509	12.8702	9.85743	8.40974	11.3638	1.35127	0.434317	0.666778	0.215388
AT5G50250	43.0121	48.0089	65.1052	57.8652	45.5105	61.4852	1.35101	0.434041	1.16651	0.068153
AT3G05060	26.382	25.9078	36.6552	33.9867	26.1449	35.3209	1.35097	0.433994	1.67527	0.0211215
AT3G53668	4.17366	2.20276	4.51431	4.09971	3.18821	4.30701	1.35092	0.433938	0.417667	0.382237
AT3G18070	1.19409	1.30317	1.94408	1.42944	1.24863	1.68676	1.35089	0.433906	0.623968	0.237701
AT5G08130	12.3499	11.365	18.8883	13.1452	11.8574	16.0167	1.35077	0.433786	0.538247	0.28957
AT5G47190	171.809	172.87	242.78	222.709	172.339	232.745	1.3505	0.433496	1.57547	0.0265782
AT1G14640	1.77426	1.71808	2.51868	2.19739	1.74617	2.35803	1.3504	0.43339	1.192	0.0642685
AT4G17785	1.16375	1.27457	1.72527	1.56709	1.21916	1.64618	1.35026	0.433233	1.3231	0.0475226
AT4G28740	11.3338	10.145	15.1927	13.805	10.7394	14.4989	1.35007	0.433031	1.26525	0.0542936
AT5G08340	4.81352	4.27497	6.47504	5.79376	4.54425	6.1344	1.34993	0.432882	1.17301	0.0671415
AT5G06130	23.4274	21.2763	33.4495	26.8885	22.3519	30.169	1.34973	0.432673	0.818619	0.151838
AT1G35420	22.5989	23.4903	29.7328	32.4728	23.0446	31.1028	1.34968	0.432615	1.51559	0.0305079
AT1G02330	13.5199	14.4484	18.847	18.897	13.9842	18.872	1.34952	0.432452	2.0493	0.00892693
AT4G13200	20.4411	18.5852	24.1632	28.5022	19.5132	26.3327	1.34948	0.432408	0.992368	0.101773
AT2G26740	19.5368	15.6581	25.5033	21.9899	17.5974	23.7466	1.34943	0.432353	0.844079	0.143193
AT5G44870	2.83008	2.58793	3.7499	3.56125	2.70901	3.65558	1.34942	0.432335	1.59691	0.0252982
AT4G21200	1.33537	1.66839	1.93113	2.12162	1.50188	2.02638	1.34923	0.432131	0.951643	0.111778
AT4G29590	12.9006	12.5045	19.1355	15.1412	12.7025	17.1384	1.34921	0.432113	0.802251	0.15767
AT1G62510	13.5903	12.6227	16.9262	18.4396	13.1065	17.6829	1.34917	0.432071	1.43861	0.0364244
AT5G07900	12.5648	13.5437	17.312	17.9091	13.0543	17.6105	1.34902	0.431916	1.81058	0.0154677
AT3G55400	21.2802	18.2622	27.9817	25.3603	19.7712	26.671	1.34898	0.431871	1.12703	0.0746406
AT5G61940	1.39117	1.39078	2.07872	1.67405	1.39098	1.87638	1.34897	0.431857	0.858417	0.138543
AT5G44280	4.75484	3.50746	5.81912	5.32581	4.13115	5.57246	1.34889	0.431772	0.783429	0.164654
AT2G24683	1	1.24866	1.56034	1.47279	1.12433	1.51657	1.34886	0.431741	1.01407	0.0968124
AT2G26980	17.501	15.5622	22.8885	21.7068	16.5316	22.2977	1.34879	0.431667	1.43597	0.0366466
AT2G04047	1	1.80007	1.58693	2.18949	1.40003	1.88821	1.34869	0.431558	0.364041	0.432473
AT4G25650	12.6675	12.6506	18.8186	15.3227	12.6591	17.0707	1.34849	0.431347	0.894078	0.127621
AT5G58480	5.98408	6.3696	8.42516	8.2334	6.17684	8.32928	1.34847	0.431322	2.00628	0.00985643
AT5G50950	1.54377	1.60162	2.03176	2.20958	1.57269	2.12067	1.34843	0.431281	1.55437	0.0279013
AT5G48630	10.6633	10.6858	15.1324	13.6519	10.6745	14.3921	1.34827	0.431111	1.42658	0.0374477
AT5G40850	99.361	94.9906	142.651	119.331	97.1758	130.991	1.34798	0.430795	0.982161	0.104193
AT2G45460	2.05697	2.01702	2.76293	2.72853	2.03699	2.74573	1.34793	0.430748	2.85998	0.00138044
AT2G19380	2.52172	2.52614	3.77273	3.03115	2.52393	3.40194	1.34788	0.430687	0.849352	0.141465
AT2G27090	4.19309	4.44836	5.9989	5.64864	4.32073	5.82377	1.34787	0.430678	1.6955	0.0201606
AT3G49470	49.6764	44.3303	63.9445	62.7311	47.0033	63.3378	1.34752	0.430303	1.56827	0.0270229
AT5G11270	22.9676	22.7405	31.362	30.2281	22.8541	30.7951	1.34747	0.430248	2.27898	0.00526045
AT1G48315	1.54641	1.32842	2.30242	1.57127	1.43741	1.93685	1.34745	0.430237	0.493956	0.32066
AT3G10180	2.31489	1.95848	3.18503	2.57204	2.13669	2.87853	1.3472	0.429959	0.765777	0.171484
AT1G47600	6.91888	8.41143	8.02933	12.6212	7.66515	10.3253	1.34704	0.429791	0.4141	0.385389
AT5G15580	6.66092	6.61303	10.106	7.77283	6.63697	8.93942	1.34691	0.429656	0.727706	0.187195
AT3G26812	1	1.1849	1.94212	1	1.09245	1.47106	1.34657	0.42929	0.289941	0.512931
AT5G13410	13.5504	11.4588	16.861	16.8147	12.5046	16.8379	1.34654	0.429253	1.2706	0.0536287
AT2G43945	23.2693	27.2023	33.1444	34.8148	25.2358	33.9796	1.34648	0.429197	1.26091	0.0548387
AT5G67170	3.26162	3.10421	4.9371	3.63362	3.18292	4.28536	1.34636	0.429068	0.628756	0.235095
AT2G04700	51.0286	46.9712	65.1477	66.7858	48.9999	65.9667	1.34626	0.428959	1.78986	0.0162235
AT2G36010	4.28613	3.34305	5.89874	4.37213	3.81459	5.13543	1.34626	0.428959	0.554644	0.278841
AT1G77250	3.5852	4.2277	5.62844	4.88968	3.90645	5.25906	1.34625	0.428947	0.959301	0.109825
AT5G60780	1.2092	1.27537	2.02022	1.32462	1.24228	1.67242	1.34625	0.428944	0.464215	0.343388
AT3G20680	9.3182	8.81456	12.4566	11.9516	9.06638	12.2041	1.34609	0.428771	1.89715	0.0126722
AT1G34844	2.21914	1.98585	2.53232	3.1279	2.10249	2.83011	1.34607	0.428755	0.821858	0.15071
AT5G51545	30.9981	36.0482	47.8215	42.4235	33.5232	45.1225	1.34601	0.428688	1.05407	0.0882928
AT3G28070	2.23916	2.02379	2.8919	2.84597	2.13148	2.86893	1.34598	0.42866	1.66608	0.0215735
AT1G65690	6.26856	6.85421	9.56681	8.09595	6.56138	8.83138	1.34596	0.428639	0.986609	0.103131
AT4G15560	61.956	60.9032	85.6689	79.6872	61.4296	82.6781	1.3459	0.428571	1.70289	0.0198204
AT5G45320	1.32795	1.52964	1.66777	2.17803	1.4288	1.9229	1.34582	0.428485	0.670635	0.213484
AT3G21640	5.70539	5.82893	7.8014	7.72039	5.76716	7.76089	1.3457	0.428361	2.86333	0.00136985
AT1G69325	2.75675	3.34132	5.53168	2.67423	3.04903	4.10295	1.34566	0.428311	0.263643	0.544951
AT1G18090	4.85388	5.03256	7.21562	6.08804	4.94322	6.65183	1.34565	0.4283	1.01847	0.0958372
AT1G09710	3.81979	3.69146	6.0236	4.08217	3.75563	5.05288	1.34542	0.428054	0.503118	0.313966
AT3G62150	5.28121	3.79538	6.11517	6.09637	4.53829	6.10577	1.34539	0.428023	0.771201	0.169356
AT1G03910	13.0068	12.8113	17.3162	17.4169	12.909	17.3665	1.3453	0.42793	3.21639	0.000607587
AT3G01510	5.64012	5.79881	7.75547	7.63284	5.71946	7.69416	1.34526	0.427883	2.59027	0.0025688
AT4G25450	13.2919	12.6264	18.2272	16.6382	12.9592	17.4327	1.3452	0.427824	1.45433	0.0351295
AT1G68890	8.99572	7.56454	12.4973	9.77469	8.28013	11.136	1.34491	0.427506	0.689431	0.204442
AT5G37190	5.56073	4.64985	7.23796	6.49086	5.10529	6.86441	1.34457	0.427143	1.01676	0.0962141
AT1G22650	9.12093	7.39702	11.3534	10.8554	8.25897	11.1044	1.34453	0.427097	1.06202	0.0866915
AT1G12244	6.04098	4.60779	7.20778	7.10971	5.32439	7.15875	1.34452	0.427092	0.902483	0.125175
AT5G61420	13.6811	13.3829	19.1562	17.2287	13.532	18.1924	1.3444	0.426966	1.38608	0.0411073
AT2G01640	5.65205	6.27181	8.67396	7.35531	5.96193	8.01463	1.3443	0.426857	0.973642	0.106257
AT3G06980	29.6663	30.5836	42.295	38.6946	30.1249	40.4948	1.34423	0.426779	1.51389	0.0306274
AT2G46240	2.26955	2.2791	3.49919	2.6151	2.27433	3.05715	1.3442	0.426746	0.660331	0.21861
AT3G52050	6.70697	6.35324	8.58524	8.96996	6.53011	8.7776	1.34417	0.42672	1.87778	0.0132502
AT4G25050	311.139	274.669	388.631	398.763	292.904	393.697	1.34411	0.426656	1.475	0.0334963
AT1G04660	2.61063	3.12217	3.59454	4.10948	2.8664	3.85201	1.34385	0.426371	0.946728	0.11305
AT1G21350	15.3246	14.8446	22.7518	17.7886	15.0846	20.2702	1.34377	0.426286	0.761833	0.173048
AT3G53720	1.57392	1.37316	1.97537	1.98474	1.47354	1.98006	1.34374	0.426256	1.42968	0.0371805
AT3G10130	5.28709	5.15484	7.94282	6.08596	5.22097	7.01439	1.3435	0.426001	0.712556	0.19384
AT4G21860	68.8898	71.7147	101.475	87.4194	70.3023	94.447	1.34344	0.425934	1.10807	0.0779703
AT1G73090	9.0469	8.03662	11.7048	11.2437	8.54176	11.4742	1.34331	0.425792	1.46811	0.0340326
AT1G29270	1.35014	1.67675	2.07978	1.98598	1.51344	2.03288	1.34322	0.425691	1.03432	0.0924017
AT1G09890	2.07347	1.7796	2.60188	2.57336	1.92653	2.58762	1.34315	0.425617	1.33329	0.0464209
AT4G29400	12.3732	12.2594	18.308	14.7768	12.3163	16.5424	1.34313	0.425598	0.856492	0.139158
AT1G56300	21.4674	23.5052	32.493	27.9107	22.4863	30.2019	1.34312	0.425593	1.03918	0.0913725
AT3G12860	5.01524	4.57193	7.26299	5.61255	4.79358	6.43777	1.343	0.425456	0.71171	0.194218
AT5G50100	5.04798	4.59476	6.81846	6.13051	4.82137	6.47449	1.34287	0.425323	1.24531	0.0568449
AT5G02860	5.99664	6.44985	8.83673	7.87636	6.22325	8.35654	1.34279	0.425239	1.2462	0.0567288
AT3G44880	7.8693	8.82242	12.2843	10.1283	8.34586	11.2063	1.34274	0.425178	0.86648	0.135994
AT3G60320	21.2322	19.9065	29.2281	26.0031	20.5693	27.6156	1.34256	0.424989	1.25092	0.0561155
AT5G24630	3.42998	2.9606	4.58304	3.99625	3.19529	4.28964	1.34249	0.424913	0.998157	0.100425
AT3G04320	5.90747	7.26229	7.78	9.89972	6.58488	8.83986	1.34245	0.424867	0.667796	0.214884
AT1G52905	6.58138	8.696	10.7341	9.77497	7.63869	10.2545	1.34244	0.424862	0.815254	0.153019
AT2G46735	3.59731	4.16908	5.79739	4.62825	3.8832	5.21282	1.3424	0.424818	0.750214	0.17774
AT2G42660	1.70173	1.74894	2.54101	2.09029	1.72534	2.31565	1.34214	0.424538	0.916694	0.121145
AT3G03650	1.45788	1.80892	2.02167	2.36268	1.6334	2.19217	1.34209	0.424486	0.824366	0.149842
AT5G10150	3.96712	2.71523	4.58145	4.38678	3.34118	4.48411	1.34208	0.424466	0.671705	0.212959
AT5G07600	1	1.07363	1.37539	1.40754	1.03682	1.39147	1.34206	0.424446	1.90004	0.0125882
AT4G11280	4.46927	6.53212	3.9853	10.778	5.50069	7.38163	1.34195	0.424326	0.187678	0.649116
AT3G01310	10.9959	9.896	15.0538	12.9811	10.4459	14.0175	1.34191	0.424286	1.03114	0.0930815
AT4G01037	26.9827	28.1722	34.9739	39.0332	27.5774	37.0035	1.3418	0.424175	1.32943	0.0468354
AT2G42130	17.427	19.4478	24.2565	25.2204	18.4374	24.7385	1.34176	0.424124	1.52082	0.0301426
AT1G29070	358.417	331.94	459.052	467.23	345.179	463.141	1.34174	0.424109	1.86911	0.0135172
AT4G23600	1.83807	1.66219	2.20358	2.49143	1.75013	2.3475	1.34133	0.423668	1.14692	0.0712982
AT3G51820	61.3058	60.8305	85.8503	77.9734	61.0681	81.9118	1.34132	0.423652	1.46833	0.0340149
AT4G02420	2.05612	1.89609	2.85985	2.44056	1.97611	2.6502	1.34112	0.42344	1.02116	0.0952436
AT2G21860	30.2159	28.7433	40.2425	38.8267	29.4796	39.5346	1.34108	0.423397	1.99302	0.010162
AT5G50160	3.31313	2.64825	3.83028	4.16346	2.98069	3.99687	1.34092	0.423224	0.951263	0.111876
AT1G10890	15.2742	15.7437	23.5928	17.9995	15.5089	20.7962	1.34092	0.42322	0.698412	0.200257
AT3G61800	3.66544	3.86255	5.31887	4.77492	3.76399	5.04689	1.34083	0.423131	1.32542	0.0472697
AT5G16620	24.3536	22.325	32.3017	30.2808	23.3393	31.2912	1.34071	0.422996	1.50976	0.0309197
AT2G13440	10.0726	8.39388	13.3464	11.4033	9.23323	12.3749	1.34025	0.422505	0.872229	0.134206
AT4G24190	73.6341	70.6777	99.0676	94.3064	72.1559	96.687	1.33997	0.422205	1.89283	0.0127987
AT3G51660	10.2205	13.0319	14.1862	16.9711	11.6262	15.5787	1.33996	0.422188	0.735573	0.183835
AT3G48790	1.44712	1	1.88503	1.39373	1.22356	1.63938	1.33984	0.422064	0.472152	0.337169
AT1G05730	2.16907	1.70923	3.06236	2.13335	1.93915	2.59786	1.33969	0.4219	0.479415	0.331578
AT2G19690	3.36896	4.33507	4.76954	5.5498	3.85202	5.15967	1.33947	0.421666	0.770026	0.169814
AT1G13160	10.7879	9.87086	14.9618	12.7083	10.3294	13.8351	1.33939	0.421576	0.990267	0.102266
AT3G29140	2.31297	3.0128	3.75683	3.37611	2.66289	3.56647	1.33933	0.421507	0.819843	0.151411
AT3G24520	3.90182	4.7023	5.2922	6.2311	4.30206	5.76165	1.33928	0.421455	0.848789	0.141648
AT4G02990	22.5048	24.3412	31.8926	30.8461	23.423	31.3694	1.33926	0.421431	1.7637	0.0172306
AT5G63700	3.76246	4.08137	5.35674	5.14579	3.92192	5.25126	1.33895	0.421105	1.69761	0.0200629
AT4G08991	1	1.44888	1.71048	1.56839	1.22444	1.63943	1.33893	0.421077	0.65761	0.219984
AT2G05440	146.992	120.402	211.678	146.322	133.697	179	1.33885	0.420994	0.484445	0.32776
AT3G60840	4.57977	4.62708	6.39488	5.93038	4.60343	6.16263	1.33871	0.420839	1.66372	0.021691
AT4G16970	3.35817	2.96498	4.42252	4.0421	3.16157	4.23231	1.33867	0.420803	1.22547	0.0595024
AT4G28610	15.3778	13.2104	19.5309	18.7341	14.2941	19.1325	1.33849	0.420605	1.27984	0.0525003
AT3G14900	12.1563	13.8462	18.0154	16.7835	13.0012	17.3994	1.33829	0.420391	1.28285	0.0521372
AT5G03250	2.50895	1.50764	2.72405	2.65029	2.00829	2.68717	1.33804	0.420119	0.510199	0.308888
AT2G19170	3.81329	3.54656	5.50132	4.34544	3.67993	4.92338	1.3379	0.419972	0.767023	0.170993
AT1G63240	5.35514	4.11569	6.83429	5.83543	4.73542	6.33486	1.33776	0.419822	0.739429	0.18221
AT2G42870	7.41338	4.92022	8.60585	7.89286	6.1668	8.24935	1.3377	0.419759	0.603003	0.249458
AT2G29180	43.0048	38.8312	53.0791	56.3832	40.918	54.7311	1.33758	0.419627	1.4537	0.03518
AT1G17455	6.69163	5.9765	7.70345	9.24048	6.33406	8.47196	1.33752	0.419566	0.893627	0.127754
AT3G44205	1.53418	1.35323	1.73997	2.12198	1.4437	1.93097	1.33751	0.419554	0.830948	0.147588
AT4G36530	10.5446	8.42189	12.9802	12.3871	9.48325	12.6837	1.33748	0.419519	0.995975	0.100931
AT4G25170	20.4371	20.6365	29.7382	25.1953	20.5368	27.4668	1.33744	0.419476	1.03204	0.0928886
AT3G61210	2.29911	1.94208	3.33529	2.33624	2.12059	2.83577	1.33725	0.41927	0.508656	0.309987
AT5G61330	10.5886	8.49175	13.0423	12.4717	9.54016	12.757	1.33719	0.419205	1.0103	0.0976571
AT5G41240	4.48397	3.99199	6.07567	5.25575	4.23798	5.66571	1.33689	0.41888	1.01672	0.0962225
AT2G14920	1.10396	1.26351	1.6711	1.49381	1.18374	1.58246	1.33683	0.418818	1.10235	0.0790042
AT2G46100	7.74497	6.53725	9.17009	9.92246	7.14111	9.54627	1.33681	0.41879	1.11089	0.0774667
AT3G20930	9.91965	7.41899	12.871	10.3073	8.66932	11.5891	1.3368	0.418781	0.61163	0.244551
AT2G38330	9.7324	9.18773	13.2803	12.0104	9.46006	12.6453	1.33671	0.418683	1.35687	0.0439677
AT3G57970	2.37228	2.24376	3.39286	2.77592	2.30802	3.08439	1.33638	0.418332	0.877112	0.132705
AT5G66550	10.9776	10.4177	14.6466	13.9455	10.6976	14.2961	1.33638	0.418328	1.81841	0.0151911
AT1G30975	1	1	1.42694	1.24574	1	1.33634	1.33634	0.418286	1.18369	0.0655097
AT4G14660	5.99886	5.60649	7.30399	8.20341	5.80268	7.7537	1.33623	0.418167	1.23798	0.0578117
AT5G10400	66.4697	73.3966	94.3986	92.481	69.9332	93.4398	1.33613	0.418061	1.6462	0.0225838
AT1G06960	7.82923	6.27063	8.33814	10.5005	7.04993	9.41933	1.33609	0.418015	0.662717	0.217412
AT4G15260	4.62092	4.35299	6.18444	5.80523	4.48696	5.99483	1.33606	0.417982	1.64028	0.0228938
AT4G36690	47.2193	40.6227	65.3726	51.9715	43.921	58.6721	1.33585	0.417763	0.728325	0.186928
AT5G54910	5.40584	6.29545	8.22038	7.41068	5.85065	7.81553	1.33584	0.417748	1.08461	0.0822975
AT5G05690	25.8886	23.1251	31.4436	34.0295	24.5068	32.7366	1.33581	0.41772	1.30964	0.049018
AT2G40760	8.55323	8.50342	10.599	12.1842	8.52833	11.3916	1.33574	0.417637	1.16197	0.0688699
AT3G23020	2.23042	2.62989	3.48707	3.00478	2.43016	3.24593	1.33569	0.417582	0.916733	0.121134
AT2G01630	8.44205	9.06783	12.7747	10.6114	8.75494	11.693	1.33559	0.417482	0.917869	0.120818
AT4G27310	24.7666	22.7142	29.9062	33.5066	23.7404	31.7064	1.33555	0.41743	1.21119	0.0614909
AT1G56180	9.47007	10.5879	14.0545	12.732	10.029	13.3932	1.33545	0.417329	1.21964	0.0603061
AT2G42260	3.31954	3.06702	4.01194	4.5168	3.19328	4.26437	1.33542	0.417296	1.20098	0.0629529
AT1G55010	1	1	1.29727	1.37344	1	1.33535	1.33535	0.417221	1.8978	0.0126532
AT1G16720	19.5538	16.4477	25.4114	22.6624	18.0007	24.0369	1.33533	0.417196	0.997582	0.100558
AT3G57950	1.68784	1.85426	2.5348	2.19441	1.77105	2.3646	1.33514	0.416992	1.0528	0.0885518
AT1G09410	1.40026	1.37018	1.77873	1.91979	1.38522	1.84926	1.33499	0.416828	1.63242	0.0233122
AT4G24770	443.438	441.505	584.455	596.431	442.472	590.443	1.33442	0.416214	2.7757	0.00167611
AT5G09880	25.2205	22.2849	35.4177	27.9727	23.7527	31.6952	1.33439	0.416176	0.731493	0.185569
AT2G06925	21.0384	22.1894	31.2299	26.4496	21.6139	28.8398	1.33432	0.416102	1.00488	0.0988827
AT1G66840	3.91511	3.44526	4.7406	5.08034	3.68018	4.91047	1.3343	0.416083	1.28995	0.0512926
AT3G08000	2.27032	3.44614	3.67565	3.9514	2.85823	3.81353	1.33423	0.416006	0.594369	0.254467
AT2G28605	14.0118	12.6099	16.1564	19.3631	13.3109	17.7597	1.33423	0.416004	0.899267	0.126105
AT1G53625	1.43067	2.21642	2.1822	2.68287	1.82354	2.43254	1.33396	0.415719	0.49322	0.321204
AT2G16365	4.51371	4.19882	5.83887	5.78321	4.35627	5.81104	1.33395	0.415705	1.92577	0.011864
AT3G62750	14.3708	11.4645	17.5383	16.9239	12.9177	17.2311	1.33392	0.415667	0.995965	0.100933
AT1G51340	1.83797	2.01842	2.68674	2.45714	1.9282	2.57194	1.33386	0.415607	1.3207	0.047786
AT2G34060	3.97758	2.89307	5.10513	4.05908	3.43533	4.58211	1.33382	0.415563	0.57285	0.267393
AT1G33040	92.9515	95.509	128.367	123.003	94.2302	125.685	1.33381	0.415554	2.05526	0.0088053
AT5G55280	31.8735	33.0173	45.2011	41.324	32.4454	43.2625	1.33339	0.415104	1.47908	0.0331837
AT5G43560	8.53724	8.30473	12.4636	9.99204	8.42098	11.2278	1.33331	0.415015	0.81773	0.152149
AT5G51110	139.768	127.129	182.097	173.73	133.448	177.913	1.3332	0.414894	1.55526	0.0278449
AT2G34110	1.20663	1	1.85582	1.086	1.10332	1.47091	1.33317	0.414859	0.343216	0.453716
AT2G24350	1.42609	1.35548	1.90129	1.80661	1.39079	1.85395	1.33303	0.414704	1.79939	0.0158714
AT4G14510	6.48183	6.72288	9.7787	7.82247	6.60235	8.80058	1.33295	0.414619	0.80843	0.155443
AT3G63160	422.571	453.828	594.133	574.01	438.2	584.072	1.33289	0.414557	1.79995	0.0158507
AT4G03250	1.94858	2.26586	2.72721	2.89003	2.10722	2.80862	1.33286	0.414522	1.22938	0.0589681
AT5G46420	32.9446	30.8801	44.2808	40.7859	31.9124	42.5334	1.33282	0.414481	1.46056	0.0346289
AT1G72780	1.34266	1.04724	2.104	1.08122	1.19495	1.59261	1.33278	0.414441	0.273345	0.532911
AT3G46666	1	1	1.59216	1.07325	1	1.33271	1.33271	0.414357	0.483753	0.328282
AT1G64530	5.94548	6.17381	9.45928	6.69203	6.05965	8.07566	1.33269	0.414346	0.547283	0.283607
AT1G78140	12.4166	11.4281	17.0221	14.7543	11.9224	15.8882	1.33264	0.414286	1.07032	0.0850512
AT3G60370	21.503	21.806	29.0037	28.7074	21.6545	28.8556	1.33254	0.414182	3.06303	0.000864901
AT1G06190	59.0603	59.9731	82.9502	75.6571	59.5167	79.3037	1.33246	0.414092	1.48403	0.0328075
AT5G47690	15.5255	13.8712	21.0732	18.0951	14.6983	19.5841	1.33241	0.414033	0.986779	0.103091
AT2G14080	2.2451	2.04453	2.73596	2.97929	2.14481	2.85763	1.33234	0.413965	1.34098	0.0456063
AT3G55980	8.55757	12.6481	6.99288	21.2593	10.6028	14.1261	1.3323	0.413915	0.166389	0.681728
AT3G24750	1.59242	2.55503	2.72784	2.7978	2.07373	2.76282	1.3323	0.413914	0.538373	0.289486
AT2G20710	3.67499	3.89351	5.57116	4.51228	3.78425	5.04172	1.33229	0.413908	0.837046	0.14553
AT1G43560	48.1208	46.4493	63.8288	62.1537	47.2851	62.9913	1.33216	0.413768	2.24969	0.00562744
AT5G58040	8.61016	8.44743	12.4557	10.2671	8.5288	11.3614	1.33212	0.413722	0.910122	0.122992
AT3G62050	2.82867	2.13608	3.55062	3.06227	2.48238	3.30645	1.33197	0.413561	0.718465	0.191221
AT5G17450	5.07663	4.49286	7.376	5.36771	4.78474	6.37186	1.3317	0.413273	0.57125	0.26838
AT1G64142	15.7426	19.4213	18.035	28.7879	17.5819	23.4115	1.33156	0.413122	0.38425	0.41281
AT1G43850	8.70604	9.28321	13.3593	10.594	8.99463	11.9766	1.33153	0.413085	0.77166	0.169176
AT2G30340	6.23224	6.91672	9.33891	8.16928	6.57448	8.75409	1.33153	0.413081	1.0728	0.0845672
AT3G60810	10.0242	8.97872	12.5489	12.7538	9.50145	12.6513	1.33151	0.413068	1.56182	0.027427
AT4G19170	3.11503	3.02972	4.01901	4.16256	3.07238	4.09079	1.33147	0.413022	2.17693	0.00665387
AT3G24080	48.2386	43.8231	61.9068	60.6682	46.0308	61.2875	1.33144	0.412993	1.66054	0.0218504
AT2G46790	2.30517	2.05736	2.82365	2.98291	2.18127	2.90328	1.33101	0.412519	1.40691	0.0391823
AT1G64430	12.5925	9.90208	15.9698	13.9697	11.2473	14.9698	1.33097	0.412476	0.80547	0.156506
AT5G52960	40.8897	34.3153	50.1141	49.972	37.6025	50.043	1.33084	0.41234	1.19864	0.0632929
AT1G19870	12.7339	12.4072	17.2831	16.1602	12.5705	16.7216	1.33023	0.411673	1.71513	0.0192695
AT2G06510	3.46211	4.07387	5.02653	4.99537	3.76799	5.01095	1.32987	0.41129	1.25419	0.0556938
AT4G26370	41.6248	38.2758	54.847	51.4025	39.9503	53.1248	1.32977	0.411177	1.4993	0.0316741
AT2G46840	1.62046	1.32696	2.00984	1.90931	1.47371	1.95958	1.32969	0.411089	1.05262	0.0885895
AT1G31690	1.30611	1.31596	1.88389	1.6025	1.31104	1.7432	1.32963	0.411028	1.03738	0.0917532
AT1G51740	5.13839	3.58357	6.11286	5.4827	4.36098	5.79778	1.32947	0.410847	0.640406	0.228873
AT3G05155	1.2375	1.69699	1.93056	1.97053	1.46724	1.95054	1.32939	0.410769	0.766803	0.171079
AT1G63860	2.2102	1.8202	3.03327	2.32346	2.0152	2.67836	1.32908	0.410428	0.614122	0.243152
AT5G54865	1.20465	1	1.93008	1	1.10232	1.46504	1.32905	0.410391	0.279195	0.525781
AT3G44020	9.53361	9.50132	13.6372	11.6548	9.51747	12.646	1.32872	0.410034	1.05832	0.0874347
AT3G50790	12.7164	12.2726	17.2138	15.9887	12.4945	16.6013	1.32868	0.409999	1.6152	0.0242549
AT2G28830	2.36001	1.92593	2.95833	2.73568	2.14297	2.847	1.32853	0.409832	0.991388	0.102003
AT2G46495	1.18343	1.36202	1.71896	1.66265	1.27272	1.69081	1.32849	0.409792	1.33097	0.0466694
AT1G22850	43.841	36.7975	55.5066	51.6182	40.3193	53.5624	1.32846	0.40975	1.09048	0.0811928
AT5G19855	15.738	16.9969	21.1634	22.3203	16.3675	21.7418	1.32836	0.409643	1.61296	0.0243802
AT4G24760	7.9332	7.89472	11.7766	9.24774	7.91396	10.5122	1.32831	0.409587	0.753821	0.17627
AT3G03340	10.1325	8.23382	11.5385	12.8552	9.18314	12.1969	1.32818	0.409454	0.917673	0.120872
AT2G23670	199.828	183.02	250.462	257.997	191.424	254.23	1.3281	0.409362	1.68125	0.0208331
AT3G51510	51.4377	39.306	57.8686	62.6393	45.3718	60.2539	1.328	0.409259	0.824294	0.149867
AT2G32200	1.18896	1	1	1.90676	1.09448	1.45338	1.32792	0.409166	0.284464	0.519441
AT3G13225	5.59721	4.669	7.56798	6.06269	5.13311	6.81534	1.32772	0.408952	0.70455	0.197447
AT5G53440	10.0266	9.38499	13.7592	12.0129	9.7058	12.8861	1.32766	0.408891	1.11957	0.0759327
AT2G11270	1	1	1.65511	1	1	1.32756	1.32756	0.408774	0.374019	0.42265
AT2G31320	2.5354	3.13998	3.87121	3.66298	2.83769	3.7671	1.32752	0.408737	0.99669	0.100765
AT5G28500	95.8767	101.737	128.854	133.478	98.8067	131.166	1.3275	0.408712	1.88462	0.013043
AT5G38060	5.72147	3.75542	6.02753	6.55242	4.73845	6.28998	1.32743	0.40864	0.573845	0.266781
AT1G34044	1.31397	1.21465	1.89996	1.45647	1.26431	1.67822	1.32738	0.408579	0.677527	0.210123
AT2G22360	18.1841	19.8875	27.6593	22.876	19.0358	25.2677	1.32738	0.408576	0.874468	0.133516
AT5G38510	7.82374	5.78552	9.50368	8.56001	6.80463	9.03185	1.32731	0.408504	0.730934	0.185809
AT5G25840	3.74884	3.04293	3.65302	5.36172	3.39588	4.50737	1.32731	0.4085	0.45315	0.352249
AT2G33435	5.82828	4.79189	7.9714	6.12476	5.31009	7.04808	1.3273	0.408495	0.61548	0.242393
AT4G03520	110.939	103.74	147.885	137.005	107.34	142.445	1.32705	0.40822	1.48369	0.0328326
AT5G46100	1.87489	1.67492	2.8134	1.89726	1.77491	2.35533	1.32702	0.408187	0.466814	0.341339
AT5G58310	1.45971	1.26646	1.70002	1.91751	1.36309	1.80876	1.32696	0.408127	1.0359	0.0920664
AT5G59320	10.2042	12.8933	16.3356	14.3086	11.5488	15.3221	1.32673	0.407878	0.811597	0.154313
AT2G17695	10.7102	9.98627	11.9683	15.4898	10.3483	13.729	1.3267	0.407843	0.697353	0.200746
AT4G37380	2.95242	3.49204	4.39625	4.15182	3.22223	4.27404	1.32642	0.407541	1.14896	0.0709649
AT5G10950	9.86576	10.9119	13.3847	14.1746	10.3888	13.7797	1.3264	0.407511	1.45112	0.0353898
AT1G79830	15.8213	16.3969	23.9392	18.7941	16.1091	21.3667	1.32637	0.407483	0.746308	0.179346
AT5G47560	25.8995	25.4915	35.2716	32.8904	25.6955	34.081	1.32634	0.407451	1.69621	0.0201274
AT1G76220	1	1.97925	1.61965	2.33176	1.48962	1.9757	1.32631	0.407419	0.295611	0.506277
AT4G36390	30.4725	30.7837	39.9622	41.2825	30.6281	40.6223	1.32631	0.407415	2.33967	0.00457434
AT2G18940	9.75095	10.7514	13.7621	13.4291	10.2512	13.5956	1.32625	0.407351	1.6205	0.0239609
AT1G33480	2.9071	3.23509	3.93838	4.20748	3.0711	4.07293	1.32621	0.407314	1.37648	0.0420264
AT3G23080	9.29291	9.90346	13.0657	12.3924	9.59818	12.729	1.32619	0.40729	1.68976	0.0204286
AT4G19840	12.708	9.72441	14.614	15.1346	11.2162	14.8743	1.32614	0.407238	0.863247	0.13701
AT3G46230	2.22308	2.02054	3.78105	1.8465	2.12181	2.81377	1.32612	0.407209	0.259183	0.550576
AT3G29320	46.3524	45.251	63.0146	58.4381	45.8017	60.7264	1.32585	0.406922	1.62019	0.0239778
AT2G26580	9.91005	7.55543	11.8062	11.3492	8.73274	11.5777	1.32578	0.406846	0.850622	0.141052
AT2G46870	4.05518	3.71905	4.66319	5.64356	3.88712	5.15338	1.32576	0.406817	0.871282	0.134499
AT5G19875	3.43266	3.39651	4.82918	4.22419	3.41458	4.52668	1.32569	0.406744	1.17466	0.0668866
AT4G00950	5.76779	3.81282	6.40674	6.29256	4.79031	6.34965	1.32552	0.406558	0.598135	0.25227
AT1G10930	6.17288	5.93115	8.52926	7.51303	6.05202	8.02114	1.32537	0.406392	1.19584	0.0637035
AT1G61580	30.1152	30.6776	40.2695	40.2966	30.3964	40.2831	1.32526	0.406274	3.09161	0.000809817
AT2G03505	4.76734	2.92032	5.47139	4.71657	3.84383	5.09398	1.32524	0.406249	0.472608	0.336815
AT5G35220	26.5961	26.2917	38.8008	31.2872	26.4439	35.044	1.32522	0.406231	0.825517	0.149445
AT1G62580	2.1478	1.72383	2.29388	2.83675	1.93581	2.56531	1.32519	0.406197	0.679647	0.2091
AT1G69060	2.9624	2.65851	4.07701	3.37116	2.81046	3.72409	1.32508	0.406084	0.852223	0.140533
AT1G60830	3.04987	3.58037	4.75492	4.02947	3.31512	4.39219	1.3249	0.405879	0.857807	0.138737
AT1G79110	12.4197	11.511	17.6275	14.078	11.9653	15.8528	1.32489	0.405874	0.775028	0.16787
AT1G18950	7.73956	6.97741	10.2789	9.21603	7.35849	9.74748	1.32466	0.405621	1.17108	0.0674399
AT1G23390	24.4416	19.2387	28.8917	28.969	21.8402	28.9304	1.32464	0.405601	0.949236	0.112399
AT4G01060	5.03418	4.01034	5.24376	6.73518	4.52226	5.98947	1.32444	0.405386	0.608634	0.246244
AT2G31970	4.23411	4.01877	6.07954	4.84954	4.12644	5.46454	1.32427	0.405202	0.78162	0.165341
AT4G02040	5.04955	6.09049	7.86981	6.88146	5.57002	7.37564	1.32417	0.405085	0.891826	0.128284
AT5G62810	19.4282	20.6696	30.1548	22.9405	20.0489	26.5476	1.32414	0.40506	0.661942	0.2178
AT3G23670	4.11947	3.8236	5.7631	4.75424	3.97154	5.25867	1.32409	0.405002	0.872703	0.134059
AT1G18230	1.08113	1	1.32548	1.4301	1.04056	1.37779	1.32408	0.404987	1.43845	0.0364375
AT1G14250	1.12196	1.13184	1.36931	1.6147	1.1269	1.492	1.32399	0.404894	1.01348	0.0969442
AT1G26840	6.73562	4.54134	7.03853	7.88858	5.63848	7.46355	1.32368	0.404557	0.583316	0.261026
AT5G18620	10.5595	9.30965	13.6399	12.6596	9.93458	13.1498	1.32364	0.404508	1.25222	0.055947
AT2G47230	3.911	3.03928	5.02259	4.17569	3.47514	4.59914	1.32344	0.404292	0.686982	0.205597
AT4G03410	2.56829	2.31566	2.99138	3.47142	2.44197	3.2314	1.32327	0.404111	0.997595	0.100555
AT3G09870	1	1	1	1.64648	1	1.32324	1.32324	0.404076	0.374019	0.42265
AT5G44000	8.0484	8.96718	11.6334	10.8811	8.50779	11.2573	1.32317	0.404004	1.36047	0.0436046
AT5G10690	21.0314	22.716	30.7342	27.1461	21.8737	28.9402	1.32306	0.403874	1.1521	0.0704525
AT2G40690	8.44293	7.30406	11.0234	9.8093	7.87349	10.4163	1.32296	0.403772	1.03381	0.0925096
AT1G64107	1	1	1.64589	1	1	1.32294	1.32294	0.403752	0.374019	0.42265
AT4G32800	1.70516	1.88934	2.36407	2.39084	1.79725	2.37745	1.32283	0.403627	1.60602	0.0247728
AT1G17285	2.72481	2.29355	3.89415	2.74412	2.50918	3.31914	1.3228	0.403591	0.497614	0.31797
AT5G11480	39.3525	39.3439	54.3103	49.7755	39.3482	52.0429	1.32263	0.403405	1.51637	0.030453
AT5G57391	1.83382	1.46266	2.59664	1.76315	1.64824	2.17989	1.32256	0.403331	0.438844	0.364046
AT1G26900	3.64903	3.85269	5.05018	4.86979	3.75086	4.95998	1.32236	0.403114	1.90581	0.012422
AT2G35260	35.0935	34.9428	49.8294	42.7832	35.0182	46.3063	1.32235	0.403106	1.06963	0.0851869
AT1G14770	3.15736	3.54424	4.34632	4.51541	3.3508	4.43087	1.32233	0.403084	1.44195	0.0361453
AT3G02690	12.9617	12.4892	17.0927	16.561	12.7254	16.8268	1.3223	0.403048	2.12873	0.00743488
AT3G14110	59.1509	56.9853	81.0518	72.5115	58.0681	76.7816	1.32227	0.403016	1.29074	0.0511983
AT3G23940	46.6021	46.8054	66.5552	56.9501	46.7038	61.7526	1.32222	0.402962	1.05274	0.0885636
AT1G08900	3.21411	2.83072	3.55125	4.44123	3.02242	3.99624	1.3222	0.402941	0.739523	0.18217
AT4G26860	18.1278	13.8229	21.526	20.7169	15.9753	21.1214	1.32213	0.402862	0.844016	0.143214
AT5G40500	9.21954	7.0218	12.3451	9.12699	8.12067	10.736	1.32206	0.402791	0.506424	0.311584
AT5G17165	2.6391	1.32561	2.87373	2.3669	1.98235	2.62031	1.32182	0.402524	0.336817	0.46045
AT4G30845	6.30144	9.44695	10.5099	10.3059	7.8742	10.4079	1.32177	0.402474	0.603501	0.249172
AT1G69160	9.03257	8.61777	11.7774	11.5506	8.82517	11.664	1.32167	0.402366	2.16353	0.00686227
AT1G64690	2.25714	2.78238	3.40379	3.2567	2.51976	3.33024	1.32165	0.402342	1.0131	0.0970295
AT5G46840	14.4774	14.3759	19.538	18.586	14.4267	19.062	1.3213	0.401963	1.97894	0.010497
AT2G34357	9.58644	8.4733	12.9451	10.9168	9.02987	11.9309	1.32128	0.401932	0.889562	0.128955
AT4G27600	48.8007	47.3924	65.6302	61.4615	48.0966	63.5459	1.32121	0.401864	1.70591	0.0196831
AT5G44660	9.33527	7.11804	12.441	9.29509	8.22665	10.868	1.32108	0.401715	0.517799	0.303529
AT2G38140	262.915	258.127	336.107	352.189	260.521	344.148	1.321	0.401628	2.00365	0.00991639
AT5G67460	3.68825	2.40286	3.97087	4.07508	3.04555	4.02297	1.32093	0.401559	0.57056	0.268807
AT5G03420	11.0616	10.7236	15.4227	13.3506	10.8926	14.3866	1.32078	0.401385	1.09895	0.0796259
AT3G60961	1	1	1.37343	1.2679	1	1.32066	1.32066	0.401262	1.5846	0.0260258
AT3G07600	1.5456	1.58829	1.63694	2.50178	1.56695	2.06936	1.32063	0.401229	0.436926	0.365657
AT3G06660	4.90443	4.78865	6.35532	6.4455	4.84654	6.40041	1.32061	0.401209	2.65316	0.00222249
AT1G11750	46.3776	48.3609	67.4398	57.6424	47.3692	62.5411	1.32029	0.400853	1.02898	0.0935451
AT5G53800	12.033	10.2787	14.7383	14.719	11.1559	14.7286	1.32026	0.400821	1.25703	0.0553314
AT3G23890	7.94824	7.66986	11.1965	9.42227	7.80905	10.3094	1.32018	0.400738	0.964944	0.108407
AT1G45207	4.5437	5.20038	6.78935	6.07319	4.87204	6.43127	1.32004	0.400578	1.07108	0.0849022
AT2G27402	76.9731	62.732	93.306	91.0844	69.8526	92.1952	1.31985	0.400379	1.04485	0.0901872
AT3G25680	6.28988	6.61217	9.36234	7.66641	6.45103	8.51437	1.31985	0.400372	0.855949	0.139332
AT1G73540	4.51721	5.88582	5.22796	8.50242	5.20151	6.86519	1.31984	0.400368	0.349259	0.447446
AT2G40430	26.0676	24.7202	36.6674	30.3597	25.3939	33.5136	1.31975	0.400263	0.892351	0.128129
AT4G25520	7.03995	5.16214	8.91558	7.18655	6.10104	8.05106	1.31962	0.400124	0.57492	0.266122
AT2G32230	44.5106	44.0585	61.114	55.753	44.2846	58.4335	1.3195	0.399991	1.46474	0.0342975
AT2G43530	9.51055	11.076	13.0978	14.0634	10.2933	13.5806	1.31937	0.399849	1.15411	0.0701272
AT5G26200	6.33472	4.97121	7.73473	7.18184	5.65296	7.45829	1.31936	0.399837	0.874264	0.133578
AT3G08010	23.4997	21.5359	29.4805	29.9358	22.5178	29.7082	1.31932	0.399797	1.7192	0.0190899
AT3G51290	3.37874	3.80403	4.54163	4.9338	3.59139	4.73772	1.31919	0.39965	1.2353	0.0581704
AT3G05270	4.46671	4.64577	6.45688	5.56407	4.55624	6.01047	1.31917	0.399634	1.06743	0.0856189
AT3G22420	2.73375	2.66713	3.41454	3.70946	2.70044	3.562	1.31904	0.399493	1.53112	0.0294361
[truncated: 31,325 more rows]

## Sheet: UPR genes expression
UPR MARKER GENES (Srivastava et al., 2018)
geneID	gene name	col0_1	col0_2	mcaII_1	mcaII_2	Average Col-0	Average mc	mc/Col-0	Log2	LOG10	pvalue
AT5G61790	CNX1	90.5491	93.4122	94.7417	97.0992	91.9807	95.9205	1.04283	0.0605078	0.775832	0.167559
AT4G11290	AT4G11290	17.2936	20.3479	11.6951	13.5441	18.8208	12.6196	0.670513	-0.576662	1.13187	0.0738128
AT5G38900	AT5G38900	1.98937	2.04856	1.77697	1.15805	2.01897	1.46751	0.726861	-0.460248	0.661395	0.218075
AT5G05340	PRX52	1.59139	1.57161	1.6746	1.5507	1.5815	1.61265	1.0197	0.0281384	0.174753	0.668724
AT4G24190	SHD	73.6341	70.6777	99.0676	94.3064	72.1559	96.687	1.33997	0.422205	1.89283	0.0127987
AT1G09210	CRT1b	86.4193	81.1851	96.931	93.4318	83.8022	95.1814	1.13579	0.183691	1.16281	0.0687368
AT4G15470	AT4G15470	86.0273	93.5303	68.6135	76.8419	89.7788	72.7277	0.810077	-0.303869	1.03561	0.0921285
AT5G62390	BAG7	100.994	98.1949	94.5722	99.9928	99.5944	97.2825	0.976786	-0.033885	0.277679	0.527619
AT5G24360	IRE1-1	6.41845	6.19566	6.893	6.22113	6.30705	6.55706	1.03964	0.056084	0.257162	0.553143
AT1G33410	SAR1	8.2809	8.68417	9.67929	8.03704	8.48253	8.85817	1.04428	0.0625132	0.154717	0.700298
AT1G09080	BIP3	1	1.17024	1	1.10505	1.08512	1.05252	0.969961	-0.0440014	0.110448	0.775446
AT1G04980	PDIL2-2	10.8405	12.8013	12.1681	12.6951	11.8209	12.4316	1.05167	0.0726762	0.215705	0.608548
AT2G40950	BZIP17	7.57856	6.83005	7.02245	7.5439	7.20431	7.28318	1.01095	0.0157081	0.0561913	0.878636
