# Supplementary material for: Seed Longevity is Controlled by Metacaspases
Source: Research Square preprint supplement (doi:10.21203/rs.3.rs-2836590/v1), 2023-05-02
Supplement: Supplementary file 3 [file 7ce0ebb06d5886ce9b75c8ae.xlsx]

## Sheet: Setting
Sample name (color indicates replicate)	Condition	Label
1	Wild type col-0 replicate 1	light
	atmcII #1 (sextuple mutant clean line) replicate 1	heavy
2	Wild type col-0 replicate 2	light
	atmcII #2 (sextuple mutant clean line) replicate 2	heavy
3	Wild type col-0 replicate 3	light
	atmcII #1 (sextuple mutant non clean line) replicate 1	heavy
4	Wild type col-0 replicate	light
	atmcII #2 (sextuple mutant non clean line) replicate 2	heavy
Each sample contains 4 sheets:
S1 Identified peptides: All identified peptides (PSMs) exceeding Mascot’s identity threshold score at the 99% significance
S2 ProteinNterm True: List of protein N-termini, N-terminally blocked peptides starting at position 1 or 2.
S3 SCX statistics: PSM counts of identified modifications/sequences and enrichment calculation of the SCX enrichment step
S4 Quantition VALIDATED: list of N-terminally blocked peptides starting beyond position 1 or 2. L/H ratio and log2 L/H ratio are listed in column I and M, M/H ratio and log2 M/H ratio are listed in column J and N. The comment in Column K and L indicates if the ratio was:
	- validated : manually checked and curated the MS1 peak pattern in Skyline quantitation tool
	- skyline**/ mascot*ratio: refers to the quantitation tool of which the ratio was taken*
	- highlighted in green/blue /orange are the patterns of which only light / only heavy MS1 signal was detected in the corresponding comparison
These ‘singles’ point to the absence/presence of neo-N-terminal peptides in seeds of the sextuple mutant of type II metacaspases.

## Sheet: Single Peptides
	Accession	Sequence	Present in both replicates as single	Start position	P10-P'10	AA_beforeCleavage	Protein name	Label type				Comment	Total area MS1 light	Total area MS1 heavy		Mascot identify threshold	Mascot Score
#27-2 rep1	Q42431	AGSDYKSR	0	38	VGFGGYGGYGAGSDYKSRGPS	G	OLEO4_ARATH Oleosin 20.3 kDa OS=Arabidopsis thaliana OX=3702 GN=OL2 PE=2	But(1)	8	?	?	Validated single light	486193824	87682032	A[+70]GSDYK[+70]SR	45	53
#27-2 rep1	A0A1P8ANC4	AKKMKDTDSEEELKEAFR	0	38	IDFPEFLNLMAKKMKDTDSEE	M	A0A1P8ANC4_ARATH Calmodulin 4 OS=Arabidopsis thaliana OX=3702 GN=CAM4 PE=3	But(1)	18	?	?	Validated single light	15836188	3285485	A[+70]K[+70]K[+70]M[+16]K[+70]DTDSEEELK[+70]EAFR	45	50
#27-2 rep1	Q9SLA8	GGMSSAKAALESDTR	0	276	ASERIIPGYGGGMSSAKAALE	G	FABI_ARATH Enoyl-[acyl-carrier-protein] reductase [NADH], chloroplastic OS=Arabidopsis thaliana OX=3702 GN=MOD1 PE=1	But(1)	15	?	?	Validated single light	42216536	5491929	G[+70]GM[+16]SSAK[+70]AALESDTR	44	74
#27-2 rep1	A8MS03	LVIVKKGENDLPGLTDTEKPR	yes	51	IVSPDLSVLNLVIVKKGENDL	N	A8MS03_ARATH Ribosomal protein S6 OS=Arabidopsis thaliana OX=3702 GN=RPS6 PE=1	But4C13(1)	21	?	?	Validated single heavy	329249	6658369	L[+70]VIVK[+70]K[+70]GENDLPGLTDTEK[+70]PR	40	56
#27-2 rep1	A0A1P8B543	TSPKISYVVQGTGISGR	0	92	QGGLYLPTFFTSPKISYVVQG	F	A0A1P8B543_ARATH Cruciferin 3 OS=Arabidopsis thaliana OX=3702 GN=CRU3 PE=1	But4C13(1)	17	?	?	Validated single heavy	27704230	4095928	T[+70]SPK[+70]ISYVVQGTGISGR	45	49
#27-2 rep1	A0A1P8B543	QPMQGQQQGQPWQGRQGQQGQPWEGQGQQGQQGR	yes	121	PGCAETFMDSQPMQGQQQGQP	S	A0A1P8B543_ARATH Cruciferin 3 OS=Arabidopsis thaliana OX=3702 GN=CRU3 PE=1	But4C13(1)	34	?	?	Validated single heavy	27756	10715362	Q[+70]PM[+16]QGQQQGQPWQGRQGQQGQPWEGQGQQGQQGR	39	58
#27-2 rep1	O22959	ALVESHCPSLVSCSDILAIAAR	0	128	EGFDSIIKAKALVESHCPSLV	K	PER19_ARATH Peroxidase 19 OS=Arabidopsis thaliana OX=3702 GN=PER19 PE=2	But4C13(1)	22	?	?	Validated single heavy (poor signal)	880362	21629376	A[+70]LVESHC[+57]PSLVSC[+57]SDILAIAAR	45	89
#27-2 rep1	F4J573	AKEKIGIKNEDINSPNLGETVSEKAKEAKEAAKR	yes	158	DENDESWTGWAKEKIGIKNED	W	F4J573_ARATH Late embryogenesis abundant protein (LEA) family protein OS=Arabidopsis thaliana OX=3702 GN=At3g17520 PE=4	But4C13(1)	34	?	?	Validated single heavy	693991	19189112	A[+70]K[+70]EK[+70]IGIK[+70]NEDINSPNLGETVSEK[+70]AK[+70]EAK[+70]EAAK[+70]R	38.1667	60
#27-2 rep1	Q9SKP0	AQKAEETKDSAAVR	yes	344	QKTRESTESGAQKAEETKDSA	G	ECP63_ARATH Late embryogenesis abundant protein ECP63 OS=Arabidopsis thaliana OX=3702 GN=ECP63 PE=2	But4C13(1)	14	?	?	Validated single heavy	1881974	26221806	A[+70]QK[+70]AEETK[+70]DSAAVR	45	61
#27-2 rep1	Q9LYK8	MEPCLESMKTASLPDLPYAYDALEPAISEEIMR	0	26	TTLHDARGATMEPCLESMKTA	T	SODM2_ARATH Superoxide dismutase [Mn] 2, mitochondrial OS=Arabidopsis thaliana OX=3702 GN=MSD2 PE=2	But4C13(2)	33	?	?	Validated single heavy	0	251	M[+86]EPC[+57]LESM[+16]K[+70]TASLPDLPYAYDALEPAISEEIM[+16]R	40.6667	51
#27-2 rep2	Q8H0X6	NEEMALVGGVGDVPANQNSGEVESLAR	0	31	SLIASDLGFCNEEMALVGGVG	C	CYT6_ARATH Cysteine proteinase inhibitor 6 OS=Arabidopsis thaliana OX=3702 GN=CYS6 PE=1	But(1)	27	?	?	Validated single light - low signal	14260016	45548888	N[+70]EEM[+16]ALVGGVGDVPANQNSGEVESLAR	43	51
#27-2 rep2	A0A1P8AUM8	AAASPVKKR	0	50	KFRAPYRIRCAAASPVKKRYN	C	A0A1P8AUM8_ARATH 3-isopropylmalate dehydrogenase OS=Arabidopsis thaliana OX=3702 GN=IMD3 PE=3	But(1)	9	?	?	Validated single light possible - overlapping pattern	48973496	11899922	A[+70]AASPVK[+70]K[+70]R	40.2	58
#27-2 rep2	A0A1P8B9Q4	THTPIDDPSR	0	185	ACIAYVSDDNTHTPIDDPSRL	N	A0A1P8B9Q4_ARATH ACT-like superfamily protein OS=Arabidopsis thaliana OX=3702 GN=At5g25320 PE=4	But(1)	10	?	?	Validated single light possible - overlapping pattern	380549	0	T[+70]HTPIDDPSR	45	45
#27-2 rep2	F4HQT1	GYTEDDVVSTDFVGDNR	0	251	ESEGKLKGILGYTEDDVVSTD	L	F4HQT1_ARATH Glyceraldehyde-3-phosphate dehydrogenase C2 OS=Arabidopsis thaliana OX=3702 GN=GAPC2 PE=1	But(1)	17	?	?	Validated single light - low signal	7900192	785203	G[+70]YTEDDVVSTDFVGDNR	39	48
#27-2 rep2	A0A1P8BC93	PTNPAIELGPEFKKVASFLSR	0	256	FVTRNKARTNPTNPAIELGPE	N	A0A1P8BC93_ARATH UDP-glucose pyrophosphorylase 2 OS=Arabidopsis thaliana OX=3702 GN=UGP2 PE=4	But(1)	21	?	?	Validated single light	566611	477512	P[+70]TNPAIELGPEFK[+70]K[+70]VASFLSR	43.2857	80
#27-2 rep2	P15456	YISTLNSYNLPILR	0	299	DADVYKPSLGYISTLNSYNLP	G	CRU2_ARATH 12S seed storage protein CRB OS=Arabidopsis thaliana OX=3702 GN=CRB PE=1	But(2), But4C13(1)	14	?	?	Validated single light possible - overlapping pattern	54314768	20343290	Y[+70]ISTLNSYNLPILR	44.75	90
#27-2 rep2	A0A1P8B543	QGQQGQQGRQGQQGQPWEGQGQQGQQGFR	0	146	QGRQGQPWEGQGQQGQQGRQG	G	A0A1P8B543_ARATH Cruciferin 3 OS=Arabidopsis thaliana OX=3702 GN=CRU3 PE=1	But(4)	29	?	?	Validated single light	28707322	750463	Q[+70]GQQGQQGRQGQQGQPWEGQGQQGQQGFR	41	61
#27-2 rep2	O81822	EDMLEAPEEQTEKTR	0	15	FGRFPIFSILEDMLEAPEEQT	L	HS177_ARATH 17.7 kDa class II heat shock protein OS=Arabidopsis thaliana OX=3702 GN=HSP17.7 PE=2	But4C13(1)	15	?	?	Validated single heavy	2610496	18219160	E[+70]DM[+16]LEAPEEQTEK[+70]TR	43.25	48
#27-2 rep2	A8MS03	LVIVKKGENDLPGLTDTEKPR	yes	51	IVSPDLSVLNLVIVKKGENDL	N	A8MS03_ARATH Ribosomal protein S6 OS=Arabidopsis thaliana OX=3702 GN=RPS6 PE=1	But4C13(1)	21	?	?	Validated single heavy	0	18436482	L[+70]VIVK[+70]K[+70]GENDLPGLTDTEK[+70]PR	40	60
#27-2 rep2	Q9FH31	PMGPQQQSSLKMCCNELR	0	90	LDVDLEDDENPMGPQQQSSLK	N	2SS5_ARATH 2S seed storage protein 5 OS=Arabidopsis thaliana OX=3702 GN=SESA5 PE=1	But4C13(1)	18	?	?	Validated single heavy possible - overlapping pattern	771702	6671753	P[+70]M[+16]GPQQQSSLK[+70]M[+16]C[+57]C[+57]NELR	42	51
#27-2 rep2	P15456	IPGCAETFMESPVFGEGQGQGQSQGFR	yes	103	VHGRGLMGRVIPGCAETFMES	V	CRU2_ARATH 12S seed storage protein CRB OS=Arabidopsis thaliana OX=3702 GN=CRB PE=1	But4C13(1)	27	?	?	Validated single heavy - low signal	2586218	173477648	I[+70]PGC[+57]AETFM[+16]ESPVFGEGQGQGQSQGFR	38	105
#27-2 rep2	Q3E8H9	KTKDYAEEAKDKVNEGASR	0	107	AKDKAYDVKEKTKDYAEEAKD	E	Q3E8H9_ARATH Late embryogenesis abundant protein (LEA) family protein OS=Arabidopsis thaliana OX=3702 GN=At5g44310 PE=4	But4C13(1)	19	?	?	Validated single heavy - low signal	4251282	64860832	K[+140.1]TK[+70]DYAEEAK[+70]DK[+70]VNEGASR	45	66
#27-2 rep2	F4JLA9	PWEGQGQQGQQGRQGQPWEGQGQQGQQGR	0	142	WQGRQGQQGQPWEGQGQQGQQ	Q	F4JLA9_ARATH Cruciferin 3 OS=Arabidopsis thaliana OX=3702 GN=CRU3 PE=1	But4C13(1)	29	?	?	Validated single heavy possible - overlapping pattern	11592	35538584	P[+70]WEGQGQQGQQGRQGQPWEGQGQQGQQGR	40	81
#27-2 rep2	Q9ASR1	TVNKMDRCFLELQVDGEEAYQTFSR	0	156	ALGERIRPVLTVNKMDRCFLE	L	EF2_ARATH Elongation factor 2 OS=Arabidopsis thaliana OX=3702 GN=LOS1 PE=1	But4C13(1)	25	?	?	Validated single heavy - low signal	5345567	8899643	T[+70]VNK[+70]M[+16]DRC[+57]FLELQVDGEEAYQTFSR	42	51
#27-2 rep2	F4J573	AKEKIGIKNEDINSPNLGETVSEKAKEAKEAAKR	yes	158	DENDESWTGWAKEKIGIKNED	W	F4J573_ARATH Late embryogenesis abundant protein (LEA) family protein OS=Arabidopsis thaliana OX=3702 GN=At3g17520 PE=4	But4C13(1)	34	?	?	Validated single heavy	154479	11107752	A[+70]K[+70]EK[+70]IGIK[+70]NEDINSPNLGETVSEK[+70]AK[+70]EAK[+70]EAAK[+70]R	38.1667	64
#27-2 rep2	Q9SUB2	GEKTKETVKGAWESTKNAAQTVTEAVVGPEEDAEKAR	0	202	ETVKGKAEELGEKTKETVKGA	L	Q9SUB2_ARATH Late embryogenesis abundant protein (LEA) family protein OS=Arabidopsis thaliana OX=3702 GN=At4g21020 PE=2	But4C13(1)	37	?	?	Validated single heavy	0	1444938	G[+70]EK[+70]TK[+70]ETVK[+70]GAWESTK[+70]NAAQTVTEAVVGPEEDAEK[+70]AR	43	58
#27-2 rep2	Q9SKP0	AQKAEETKDSAAVR	yes	344	QKTRESTESGAQKAEETKDSA	G	ECP63_ARATH Late embryogenesis abundant protein ECP63 OS=Arabidopsis thaliana OX=3702 GN=ECP63 PE=2	But4C13(1)	14	?	?	Validated single heavy	1544498	35381772	A[+70]QK[+70]AEETK[+70]DSAAVR	45	59
#27-2 rep2	Q9SIN3	AVEVGSKAVDLTKEKAAVAADTVVGYTAR	0	447	EGAVGYAGHKAVEVGSKAVDL	K	Q9SIN3_ARATH Late embryogenesis abundant domain-containing protein / LEA domain-containing protein OS=Arabidopsis thaliana OX=3702 GN=At2g42560 PE=4	But4C13(1)	29	?	?	Validated single heavy	152238	12130601	A[+70]VEVGSK[+70]AVDLTK[+70]EK[+70]AAVAADTVVGYTAR	42	68
#27-2 rep2	Q9SIN3	AVDLTKEKAAVAADTVVGYTAR	yes	454	GHKAVEVGSKAVDLTKEKAAV	K	Q9SIN3_ARATH Late embryogenesis abundant domain-containing protein / LEA domain-containing protein OS=Arabidopsis thaliana OX=3702 GN=At2g42560 PE=4	But4C13(1)	22	?	?	Validated single heavy	953789	17954178	A[+70]VDLTK[+70]EK[+70]AAVAADTVVGYTAR	43.5	94
#27-2 rep2	Q9SIN3	ADTVVGYTAR	0	466	DLTKEKAAVAADTVVGYTARK	A	Q9SIN3_ARATH Late embryogenesis abundant domain-containing protein / LEA domain-containing protein OS=Arabidopsis thaliana OX=3702 GN=At2g42560 PE=4	But4C13(1)	10	?	?	Validated single heavy possible - overlapping pattern	6876842	115027192	A[+70]DTVVGYTAR	44.75	57
#27-2 rep2	Q9FH31	DKMCVCPTLKKAAQQVR	0	110	KMCCNELRQVDKMCVCPTLKK	V	2SS5_ARATH 2S seed storage protein 5 OS=Arabidopsis thaliana OX=3702 GN=SESA5 PE=1	But4C13(2)	17	?	?	Validated single heavy	0	15952610	D[+70]K[+70]M[+16]C[+57]VC[+57]PTLK[+70]K[+70]AAQQVR	45	69.5
#27-2 rep2	Q9SUB2	ADKAEDTKEKAKDYAEDTMDNAKEKAR	0	144	DKVNEGAYKAADKAEDTKEKA	A	Q9SUB2_ARATH Late embryogenesis abundant protein (LEA) family protein OS=Arabidopsis thaliana OX=3702 GN=At4g21020 PE=2	But4C13(2)	27	?	?	Validated single heavy	0	54872368	A[+70]DK[+70]AEDTK[+70]EK[+70]AK[+70]DYAEDTM[+16]DNAK[+70]EK[+70]AR	44.8	69
#27-2 rep2	P15455	LMGKVIPGCAETFQDSSEFQPR	0	104	KLSFVAKGRGLMGKVIPGCAE	G	CRU1_ARATH 12S seed storage protein CRA1 OS=Arabidopsis thaliana OX=3702 GN=CRA1 PE=1	But4C13(3)	22	?	?	Validated single heavy	868296	52774192	L[+70]M[+16]GK[+70]VIPGC[+57]AETFQDSSEFQPR	43.1111	63
#30 rep1	Q9FF72	LSIAGLSLGQGQIYGVLR	0	31	MALLSTSSHGLSIAGLSLGQG	G	Q9FF72_ARATH At5g05020 OS=Arabidopsis thaliana OX=3702 GN=MUG13.12 PE=2	But(1)	18	?	?	Validated single light - low signal	2481558	54739568	L[+70]SIAGLSLGQGQIYGVLR	42	64
#30 rep1	Q8H0X6	NEEMALVGGVGDVPANQNSGEVESLAR	0	31	SLIASDLGFCNEEMALVGGVG	C	CYT6_ARATH Cysteine proteinase inhibitor 6 OS=Arabidopsis thaliana OX=3702 GN=CYS6 PE=1	But(1)	27	?	?	Validated single light-low signal	9731455	0	N[+70]EEM[+16]ALVGGVGDVPANQNSGEVESLAR	43	86
#30 rep1	Q9LF88	KGDVTYKLTER	yes	33	LAAEDLKDINKGDVTYKLTER	N	Y3304_ARATH Late embryogenesis abundant protein At3g53040 OS=Arabidopsis thaliana OX=3702 GN=At3g53040 PE=2	But(1)	11	?	?	Validated single light -possible	33589728	436402	K[+140.1]GDVTYK[+70]LTER	44.6667	84
#30 rep1	Q96274	KPEVIKEKR	yes	65	IKSWNYTLDGKPEVIKEKREI	G	Q96274_ARATH Major latex homologue type2 OS=Arabidopsis thaliana OX=3702 GN=MLP2 PE=2	But(1)	9	?	?	Validated single light	35042600	0	K[+140.1]PEVIK[+70]EK[+70]R	38.1667	67
#30 rep1	A0A1P8B543	CAETFMDSQPMQGQQQGQPWQGR	0	113	TGISGRVVPGCAETFMDSQPM	G	A0A1P8B543_ARATH Cruciferin 3 OS=Arabidopsis thaliana OX=3702 GN=CRU3 PE=1	But(1)	23	?	?	Validated single light - low signal	1635629	494558	C[+127.1]AETFM[+16]DSQPM[+16]QGQQQGQPWQGR	34.375	38
#30 rep1	A0A1P8B543	RQGQQGQPWEGQGQQGQQGFR	0	154	EGQGQQGQQGRQGQQGQPWEG	G	A0A1P8B543_ARATH Cruciferin 3 OS=Arabidopsis thaliana OX=3702 GN=CRU3 PE=1	But(1)	21	?	?	Validated single light possible - low signal - overlapping pattern	8102650	0	R[+70]QGQQGQPWEGQGQQGQQGFR	43	56
#30 rep1	P15456	SDADVYKPSLGYISTLNSYNLPILR	0	288	MRCTENLDDPSDADVYKPSLG	P	CRU2_ARATH 12S seed storage protein CRB OS=Arabidopsis thaliana OX=3702 GN=CRB PE=1	But(1)	25	?	?	Validated single light-low signal	32005060	1627451	S[+70]DADVYK[+70]PSLGYISTLNSYNLPILR	45	82
#30 rep1	Q8H0X6	EEMALVGGVGDVPANQNSGEVESLAR	0	32	LIASDLGFCNEEMALVGGVGD	N	CYT6_ARATH Cysteine proteinase inhibitor 6 OS=Arabidopsis thaliana OX=3702 GN=CYS6 PE=1	But(2)	26	?	?	Validated single light - low signal	11934820	712261	E[+70]EM[+16]ALVGGVGDVPANQNSGEVESLAR	43.5	71
#30 rep1	A8MRQ4	STKLFIGGLSWGTDDASLR	0	34	TSMLGSLRLMSTKLFIGGLSW	M	A8MRQ4_ARATH Glycine-rich RNA-binding protein 2 OS=Arabidopsis thaliana OX=3702 GN=GR-RBP2 PE=4	But4C13(1)	19	?	?	Validated single light	0	14162766	S[+70]TK[+70]LFIGGLSWGTDDASLR	45	104
#30 rep1	P31265	GVDDSTQKVVDIVDTFR	0	59	PSAEEGGEDEGVDDSTQKVVD	E	TCTP1_ARATH Translationally-controlled tumor protein 1 OS=Arabidopsis thaliana OX=3702 GN=TCTP1 PE=1	But4C13(1)	17	?	?	Validated single heavy	64829344	9114058	G[+70]VDDSTQK[+70]VVDIVDTFR	45	85
#30 rep1	F4J573	QKAEDAKEAAKR	0	74	TVQDDAWRASQKAEDAKEAAK	S	F4J573_ARATH Late embryogenesis abundant protein (LEA) family protein OS=Arabidopsis thaliana OX=3702 GN=At3g17520 PE=4	But4C13(1)	12	?	?	Validated single heavy	783576	171649168	Q[+70]K[+70]AEDAK[+70]EAAK[+70]R	44	72
#30 rep1	P15456	IPGCAETFMESPVFGEGQGQGQSQGFR	yes	103	VHGRGLMGRVIPGCAETFMES	V	CRU2_ARATH 12S seed storage protein CRB OS=Arabidopsis thaliana OX=3702 GN=CRB PE=1	But4C13(1)	27	?	?	Validated single heavy-possible	3048190	153396544	I[+70]PGC[+57]AETFM[+16]ESPVFGEGQGQGQSQGFR	38	54
#30 rep1	Q3E8H9	KTKDYAEEAKDKVNEGASR	0	107	AKDKAYDVKEKTKDYAEEAKD	E	Q3E8H9_ARATH Late embryogenesis abundant protein (LEA) family protein OS=Arabidopsis thaliana OX=3702 GN=At5g44310 PE=4	But4C13(1)	19	?	?	Validated single heavy - low signal	931521	13263202	K[+140.1]TK[+70]DYAEEAK[+70]DK[+70]VNEGASR	45	58
#30 rep1	A0A1P8B543	QPMQGQQQGQPWQGRQGQQGQPWEGQGQQGQQGR	yes	121	PGCAETFMDSQPMQGQQQGQP	S	A0A1P8B543_ARATH Cruciferin 3 OS=Arabidopsis thaliana OX=3702 GN=CRU3 PE=1	But4C13(1)	34	?	?	Validated single heavy	10124448	7146704384	Q[+70]PM[+16]QGQQQGQPWQGRQGQQGQPWEGQGQQGQQGR	39	74
#30 rep1	Q9SUB2	ADKAEDTKEKAKDYAEDTMDNAKEKAR	0	144	DKVNEGAYKAADKAEDTKEKA	A	Q9SUB2_ARATH Late embryogenesis abundant protein (LEA) family protein OS=Arabidopsis thaliana OX=3702 GN=At4g21020 PE=2	But4C13(1)	27	?	?	Validated single light possible - low signal - overlapping pattern	4461166	52155624	A[+70]DK[+70]AEDTK[+70]EK[+70]AK[+70]DYAEDTM[+16]DNAK[+70]EK[+70]AR	44.8	55
#30 rep1	P15456	NEPLILVAAADLASNQNQLDR	yes	159	GVAQWFYNNGNEPLILVAAAD	G	CRU2_ARATH 12S seed storage protein CRB OS=Arabidopsis thaliana OX=3702 GN=CRB PE=1	But4C13(1)	21	?	?	Validated single heavy-possible	4484913	357517056	N[+70]EPLILVAAADLASNQNQLDR	45	131
#30 rep1	F4J573	VSEKAKEAKEAAKR	0	178	DINSPNLGETVSEKAKEAKEA	T	F4J573_ARATH Late embryogenesis abundant protein (LEA) family protein OS=Arabidopsis thaliana OX=3702 GN=At3g17520 PE=4	But4C13(1)	14	?	?	Validated single heavy	0	19058226	V[+70]SEK[+70]AK[+70]EAK[+70]EAAK[+70]R	39	89
#30 rep1	A0A1P8AU36	VAFTRGLALQLAEKGIR	0	249	LDYTATKGAIVAFTRGLALQL	I	A0A1P8AU36_ARATH NAD(P)-binding Rossmann-fold superfamily protein OS=Arabidopsis thaliana OX=3702 GN=At1g54870 PE=4	But4C13(1)	17	?	?	Validated single heavy - low signal	294572	5671683	V[+70]AFTRGLALQLAEK[+70]GIR	38	45
#30 rep1	Q9SIN3	KAVEAKDVAAEKAQR	0	329	AARAKDYTLQKAVEAKDVAAE	Q	Q9SIN3_ARATH Late embryogenesis abundant domain-containing protein / LEA domain-containing protein OS=Arabidopsis thaliana OX=3702 GN=At2g42560 PE=4	But4C13(1)	15	?	?	Validated single heavy - possible	12964730	36085224	K[+140.1]AVEAK[+70]DVAAEK[+70]AQR	42	98
#30 rep1	F4JLA9	LPLEVISNGFQISPEEAR	0	407	LAGRTSLLRALPLEVISNGFQ	A	F4JLA9_ARATH Cruciferin 3 OS=Arabidopsis thaliana OX=3702 GN=CRU3 PE=1	But4C13(1)	18	?	?	Validated single heavy-possible	63298304	607476352	L[+70]PLEVISNGFQISPEEAR	45	112
#30 rep1	Q9SIN3	AVDLTKEKAAVAADTVVGYTAR	yes	454	GHKAVEVGSKAVDLTKEKAAV	K	Q9SIN3_ARATH Late embryogenesis abundant domain-containing protein / LEA domain-containing protein OS=Arabidopsis thaliana OX=3702 GN=At2g42560 PE=4	But4C13(1)	22	?	?	Validated single heavy-possible	1119369	178824128	A[+70]VDLTK[+70]EK[+70]AAVAADTVVGYTAR	43.5	103
#30 rep1	Q9LQP1	VENGAEAVSKPEDKEWGQKVGYVR	0	100	#N/A	#N/A	Q9LQP1_ARATH Dessication-induced 1VOC superfamily protein OS=Arabidopsis thaliana OX=3702 GN=F24B9.26 PE=2	But4C13(2)	24	?	?	Validated single heavy possible- overlapping pattern	13953414	211840928	V[+70]ENGAEAVSK[+70]PEDK[+70]EWGQK[+70]VGYVR	45	83
#30 rep1	F4J573	AKEKIGIKNEDINSPNLGETVSEKAKEAKEAAKR	yes	158	DENDESWTGWAKEKIGIKNED	W	F4J573_ARATH Late embryogenesis abundant protein (LEA) family protein OS=Arabidopsis thaliana OX=3702 GN=At3g17520 PE=4	But4C13(4)	34	?	?	Validated single heavy	487148	838769872	A[+70]K[+70]EK[+70]IGIK[+70]NEDINSPNLGETVSEK[+70]AK[+70]EAK[+70]EAAK[+70]R	38.1667	64.5
#30 rep2	Q9FGT8	KKEMEVVKGLNVER	0	4	_______MTEKKEMEVVKGLN	E	TIL_ARATH Temperature-induced lipocalin-1 OS=Arabidopsis thaliana OX=3702 GN=TIL PE=1	But(1)	14	?	?	Validated single light	75940456	36350	K[+140.1]K[+70]EM[+16]EVVK[+70]GLNVER	44.3333	59
#30 rep2	F4JLA9	QPWEGQGQQGQQGRQGQPWEGQGQQGQQGR	0	141	PWQGRQGQQGQPWEGQGQQGQ	G	F4JLA9_ARATH Cruciferin 3 OS=Arabidopsis thaliana OX=3702 GN=CRU3 PE=1	But(1)	30	?	?	Validated single light	138059904	1370940	Q[+70]PWEGQGQQGQQGRQGQPWEGQGQQGQQGR	39	44
#30 rep2	Q9SIN3	VEVGSKAVDLTKEKAAVAADTVVGYTAR	0	448	GAVGYAGHKAVEVGSKAVDLT	A	Q9SIN3_ARATH Late embryogenesis abundant domain-containing protein / LEA domain-containing protein OS=Arabidopsis thaliana OX=3702 GN=At2g42560 PE=4	But(1)	28	?	?	Validated single light	9844345	0	V[+70]EVGSK[+70]AVDLTK[+70]EK[+70]AAVAADTVVGYTAR	43	54
#30 rep2	Q9SKP0	KSGGADVTMYKVTER	0	27	LAAEDLHDINKSGGADVTMYK	N	ECP63_ARATH Late embryogenesis abundant protein ECP63 OS=Arabidopsis thaliana OX=3702 GN=ECP63 PE=2	But4C13(1)	15	?	?	Validated single heavy - possible	1483159	144575408	K[+140.1]SGGADVTM[+16]YK[+70]VTER	45	85
#30 rep2	Q9SK09	GGAWGGEGEGGGEWGGGGEGGGGGR	0	58	GGAWGGGGGGGGAWGGEGEGG	G	VCL22_ARATH Vicilin-like seed storage protein At2g28490 OS=Arabidopsis thaliana OX=3702 GN=At2g28490 PE=2	But4C13(1)	25	?	?	Validated single heavy	900854	9015713	G[+70]GAWGGEGEGGGEWGGGGEGGGGGR	35	114
#30 rep2	A0A1P8B543	CVGVSVAR	0	70	YWDHNHPQLRCVGVSVARYVI	R	A0A1P8B543_ARATH Cruciferin 3 OS=Arabidopsis thaliana OX=3702 GN=CRU3 PE=1	But4C13(1)	8	?	?	Validated single heavy - low signal	5556403	65888704	C[+127.1]VGVSVAR	45	54
#30 rep2	P15458	QGHQILQQCCSELRQEEPVCVCPTLR	0	94	DDIENPQGPQQGHQILQQCCS	Q	2SS2_ARATH 2S seed storage protein 2 OS=Arabidopsis thaliana OX=3702 GN=AT2S2 PE=2	But4C13(1)	26	?	?	Validated single heavy	34447400	32906276	Q[+70]GHQILQQC[+57]C[+57]SELRQEEPVC[+57]VC[+57]PTLR	42	47
#30 rep2	P15456	IPGCAETFMESPVFGEGQGQGQSQGFR	yes	103	VHGRGLMGRVIPGCAETFMES	V	CRU2_ARATH 12S seed storage protein CRB OS=Arabidopsis thaliana OX=3702 GN=CRB PE=1	But4C13(1)	27	?	?	Validated single heavy	0	45201880	I[+70]PGC[+57]AETFM[+16]ESPVFGEGQGQGQSQGFR	38	83
#30 rep2	A0A1P8B543	QPMQGQQQGQPWQGRQGQQGQPWEGQGQQGQQGR	yes	121	PGCAETFMDSQPMQGQQQGQP	S	A0A1P8B543_ARATH Cruciferin 3 OS=Arabidopsis thaliana OX=3702 GN=CRU3 PE=1	But4C13(1)	34	?	?	Validated single heavy	838122	1388248832	Q[+70]PM[+16]QGQQQGQPWQGRQGQQGQPWEGQGQQGQQGR	39	75
#30 rep2	F4JLA9	PWEGQGQQGQQGRQGQPWEGQGQQGQQGR	0	142	WQGRQGQQGQPWEGQGQQGQQ	Q	F4JLA9_ARATH Cruciferin 3 OS=Arabidopsis thaliana OX=3702 GN=CRU3 PE=1	But4C13(1)	29	?	?	Validated single heavy - Overlapping pattern	0	96579840	P[+70]WEGQGQQGQQGRQGQPWEGQGQQGQQGR	40	79
#30 rep2	P15456	NEPLILVAAADLASNQNQLDR	yes	159	GVAQWFYNNGNEPLILVAAAD	G	CRU2_ARATH 12S seed storage protein CRB OS=Arabidopsis thaliana OX=3702 GN=CRB PE=1	But4C13(1)	21	?	?	Validated single heavy	4459105	152527472	N[+70]EPLILVAAADLASNQNQLDR	45	87
#30 rep2	Q9SLA8	PEDVPEDVKTNKR	0	171	VYALDAVFDNPEDVPEDVKTN	N	FABI_ARATH Enoyl-[acyl-carrier-protein] reductase [NADH], chloroplastic OS=Arabidopsis thaliana OX=3702 GN=MOD1 PE=1	But4C13(1)	13	?	?	Validated single heavy	1567536	20571122	P[+70]EDVPEDVK[+70]TNK[+70]R	45	48
#30 rep2	Q9SUB2	GEKTKETVKGAWESTKNAAQTVTEAVVGPEEDAEKAR	0	202	ETVKGKAEELGEKTKETVKGA	L	Q9SUB2_ARATH Late embryogenesis abundant protein (LEA) family protein OS=Arabidopsis thaliana OX=3702 GN=At4g21020 PE=2	But4C13(1)	37	?	?	Validated single heavy	0	14223376	G[+70]EK[+70]TK[+70]ETVK[+70]GAWESTK[+70]NAAQTVTEAVVGPEEDAEK[+70]AR	43	54
#30 rep2	Q9LF88	KAKETADKAR	0	251	VGEYKDYTAEKAKETADKARE	E	Y3304_ARATH Late embryogenesis abundant protein At3g53040 OS=Arabidopsis thaliana OX=3702 GN=At3g53040 PE=2	But4C13(1)	10	?	?	Validated single heavy	486982	25515028	K[+140.1]AK[+70]ETADK[+70]AR	41	70
#30 rep2	Q9SIN3	AKDYALQKAVEAKETAAEKAQR	0	282	GNMTAEQAARAKDYALQKAVE	R	Q9SIN3_ARATH Late embryogenesis abundant domain-containing protein / LEA domain-containing protein OS=Arabidopsis thaliana OX=3702 GN=At2g42560 PE=4	But4C13(1)	22	?	?	Validated single heavy	550446	1319889	A[+70]K[+70]DYALQK[+70]AVEAK[+70]ETAAEK[+70]AQR	42.6667	94
#30 rep2	Q84L30	VMEQLEAAMPQAVTVTPEER	0	315	INEPVEGEENVMEQLEAAMPQ	N	RD23D_ARATH Ubiquitin receptor RAD23d OS=Arabidopsis thaliana OX=3702 GN=RAD23D PE=1	But4C13(1)	20	?	?	Validated single heavy	1241959	21487838	V[+70]M[+16]EQLEAAM[+16]PQAVTVTPEER	44	54
#30 rep2	Q9SKP0	GAQKAEETKDSAAVR	0	343	SQKTRESTESGAQKAEETKDS	S	ECP63_ARATH Late embryogenesis abundant protein ECP63 OS=Arabidopsis thaliana OX=3702 GN=ECP63 PE=2	But4C13(1)	15	?	?	Validated single heavy	843707	40458984	G[+70]AQK[+70]AEETK[+70]DSAAVR	45	91
#30 rep2	Q9SKP0	AQKAEETKDSAAVR	yes	344	QKTRESTESGAQKAEETKDSA	G	ECP63_ARATH Late embryogenesis abundant protein ECP63 OS=Arabidopsis thaliana OX=3702 GN=ECP63 PE=2	But4C13(1)	14	?	?	Validated single heavy	2908639	98302216	A[+70]QK[+70]AEETK[+70]DSAAVR	45	65
#30 rep2	Q9SIN3	SKAVDLTKEKAAVAADTVVGYTAR	0	452	YAGHKAVEVGSKAVDLTKEKA	G	Q9SIN3_ARATH Late embryogenesis abundant domain-containing protein / LEA domain-containing protein OS=Arabidopsis thaliana OX=3702 GN=At2g42560 PE=4	But4C13(1)	24	?	?	Validated single heavy	0	14272010	S[+70]K[+70]AVDLTK[+70]EK[+70]AAVAADTVVGYTAR	42.3333	88
#30 rep2	Q9SIN3	AVDLTKEKAAVAADTVVGYTAR	yes	454	GHKAVEVGSKAVDLTKEKAAV	K	Q9SIN3_ARATH Late embryogenesis abundant domain-containing protein / LEA domain-containing protein OS=Arabidopsis thaliana OX=3702 GN=At2g42560 PE=4	But4C13(1)	22	0.02	-5.64386	Validated Skyline ratio - possible single heavy	589073	33607800	A[+70]VDLTK[+70]EK[+70]AAVAADTVVGYTAR	43.5	96
#30 rep2	Q96274	KPEVIKEKR	yes	65	IKSWNYTLDGKPEVIKEKREI	G	Q96274_ARATH Major latex homologue type2 OS=Arabidopsis thaliana OX=3702 GN=MLP2 PE=2	But4C13(1), But(1)	9	?	?	Validated single light in MS1 - but MS2 heavy signal detected	35266896	0	K[+140.1]PEVIK[+70]EK[+70]R	38.1667	54
#30 rep2	Q9SUB2	AAQTVTEAVVGPEEDAEKAR	0	219	VKGAWESTKNAAQTVTEAVVG	N	Q9SUB2_ARATH Late embryogenesis abundant protein (LEA) family protein OS=Arabidopsis thaliana OX=3702 GN=At4g21020 PE=2	But4C13(2)	20	?	?	Validated single heavy	8627058	240965760	A[+70]AQTVTEAVVGPEEDAEK[+70]AR	45	73
#30 rep2	A0A1P8B543	CAETFMDSQPMQGQQQGQPWQGR	0	113	TGISGRVVPGCAETFMDSQPM	G	A0A1P8B543_ARATH Cruciferin 3 OS=Arabidopsis thaliana OX=3702 GN=CRU3 PE=1	But4C13(4)	23	?	?	Validated single heavy	623961	7874955	C[+127.1]AETFM[+16]DSQPM[+16]QGQQQGQPWQGR	34.375	49.5
#30 rep2	A0A1P8B3K6	TPVSLLSATEDVTR	0	162	RGAPTLTPHNTPVSLLSATED	N	A0A1P8B3K6_ARATH CAP160 protein OS=Arabidopsis thaliana OX=3702 GN=At4g25580 PE=4	But4C13(4)	14	?	?	Validated single heavy	3157800	49253456	T[+70]PVSLLSATEDVTR	45	91

## Sheet: S1  identified peptides
Accession	isoforms	Description	start position in protein	Sequence	Modified sequence	Length	Mascot score	Mascot identitythreshold	Modification	modification Qpyr present	modification AcetylNterm present	sequence_start	modification ButylNterm present
A0A1P8B543	F4JLA9 (136-154)^AQ96318 (136-154)	A0A1P8B543_ARATH Cruciferin 3 OS=Arabidopsis thaliana OX=3702 GN=CRU3 PE=1	136	QGQQGQPWEGQGQQGQQGR	NH2-Q<Pyr>GQQGQPWEGQGQQGQQGR-COOH	19	116	42	NH2	Q<Pyr>		136_QGQQGQPWEGQGQQGQQGR
A0A1P8B543	F4JLA9 (136-154)^AQ96318 (136-154)	A0A1P8B543_ARATH Cruciferin 3 OS=Arabidopsis thaliana OX=3702 GN=CRU3 PE=1	136	QGQQGQPWEGQGQQGQQGR	NH2-Q<Pyr>GQQGQPWEGQGQQGQQGR-COOH	19	91	41	NH2	Q<Pyr>		136_QGQQGQPWEGQGQQGQQGR
F4JLA9	Q96318 (141-170)	F4JLA9_ARATH Cruciferin 3 OS=Arabidopsis thaliana OX=3702 GN=CRU3 PE=1	141	QPWEGQGQQGQQGRQGQPWEGQGQQGQQGR	NH2-QPWEGQGQQGQQGRQGQPWEGQGQQGQQGR-COOH	30	44	39	NH2			141_QPWEGQGQQGQQGRQGQPWEGQGQQGQQGR
O48670		RER1A_ARATH Protein RER1A OS=Arabidopsis thaliana OX=3702 GN=RER1A PE=1	1	MDESGGDSGSVATPVQQR	Ace-M<Mox*>DESGGDSGSVATPVQQR-COOH	18	114	40	Ace		Ace	1_MDESGGDSGSVATPVQQR
A0A1P8BF32	F4K007 (591-613)^AQ39043 (646-668)	A0A1P8BF32_ARATH Heat shock protein 70 (Hsp 70) family protein OS=Arabidopsis thaliana OX=3702 GN=BIP2 PE=1	651	SGGAPGAGGESSTEEEDESHDEL	NH2-SGGAPGAGGESSTEEEDESHDEL-COOH	23	117	31	NH2			651_SGGAPGAGGESSTEEEDESHDEL
P15459		2SS3_ARATH 2S seed storage protein 3 OS=Arabidopsis thaliana OX=3702 GN=AT2S3 PE=1	109	PTLKQAAR	NH2-PTLK<But4C13>QAAR-COOH	8	46	41	NH2			109_PTLKQAAR
A0A1P8B543	F4JLA9 (137-154)^AQ96318 (137-154)	A0A1P8B543_ARATH Cruciferin 3 OS=Arabidopsis thaliana OX=3702 GN=CRU3 PE=1	137	GQQGQPWEGQGQQGQQGR	NH2-GQQGQPWEGQGQQGQQGR-COOH	18	80	41	NH2			137_GQQGQPWEGQGQQGQQGR
Q9SKP0	A0A1P8B189 (2-10)	ECP63_ARATH Late embryogenesis abundant protein ECP63 OS=Arabidopsis thaliana OX=3702 GN=ECP63 PE=2	2	ASDKQKAER	NH2-ASDK<But4C13>QK<But4C13>AER-COOH	9	47	45	NH2			2_ASDKQKAER
F4J573		F4J573_ARATH Late embryogenesis abundant protein (LEA) family protein OS=Arabidopsis thaliana OX=3702 GN=At3g17520 PE=4	260	DKASQSYDSAAR	NH2-DK<But4C13>ASQSYDSAAR-COOH	12	59	44	NH2			260_DKASQSYDSAAR
A0A1P8B543	F4JLA9 (120-135)^AQ96318 (120-135)	A0A1P8B543_ARATH Cruciferin 3 OS=Arabidopsis thaliana OX=3702 GN=CRU3 PE=1	120	SQPMQGQQQGQPWQGR	NH2-SQPM<Mox*>QGQQQGQPWQGR-COOH	16	52	42	NH2			120_SQPMQGQQQGQPWQGR
A0A1P8B543	F4JLA9 (118-135)^AQ96318 (118-135)	A0A1P8B543_ARATH Cruciferin 3 OS=Arabidopsis thaliana OX=3702 GN=CRU3 PE=1	118	MDSQPMQGQQQGQPWQGR	NH2-M<Mox*>DSQPM<Mox*>QGQQQGQPWQGR-COOH	18	63	39	NH2			118_MDSQPMQGQQQGQPWQGR
P15455	F4K8S2 (97-105)	CRU1_ARATH 12S seed storage protein CRA1 OS=Arabidopsis thaliana OX=3702 GN=CRA1 PE=1	284	LEETICSAR	NH2-LEETIC<Cmm*>SAR-COOH	9	53	45	NH2			284_LEETICSAR
A0A1P8B543	F4JLA9 (120-135)^AQ96318 (120-135)	A0A1P8B543_ARATH Cruciferin 3 OS=Arabidopsis thaliana OX=3702 GN=CRU3 PE=1	120	SQPMQGQQQGQPWQGR	NH2-SQPM<Mox*>QGQQQGQPWQGR-COOH	16	58	42	NH2			120_SQPMQGQQQGQPWQGR
A0A1P8B543	F4JLA9 (120-135)^AQ96318 (120-135)	A0A1P8B543_ARATH Cruciferin 3 OS=Arabidopsis thaliana OX=3702 GN=CRU3 PE=1	120	SQPMQGQQQGQPWQGR	NH2-SQPM<Mox*>QGQQQGQPWQGR-COOH	16	91	43	NH2			120_SQPMQGQQQGQPWQGR
Q96270		LEA7_ARATH Late embryogenesis abundant protein 7 OS=Arabidopsis thaliana OX=3702 GN=LEA7 PE=2	60	DKTSQAAQTTQER	NH2-DK<But4C13>TSQAAQTTQER-COOH	13	47	45	NH2			60_DKTSQAAQTTQER
A0A1P8B543	F4JLA9 (137-154)^AQ96318 (137-154)	A0A1P8B543_ARATH Cruciferin 3 OS=Arabidopsis thaliana OX=3702 GN=CRU3 PE=1	137	GQQGQPWEGQGQQGQQGR	NH2-GQQGQPWEGQGQQGQQGR-COOH	18	44	42	NH2			137_GQQGQPWEGQGQQGQQGR
B7ZWR6		OEP61_ARATH Outer envelope protein 61 OS=Arabidopsis thaliana OX=3702 GN=OEP61 PE=1	393	ANAPASTSYGNAEASEPR	NH2-ANAPASTSYGNAEASEPR-COOH	18	58	41	NH2			393_ANAPASTSYGNAEASEPR
F4IHK9	Q03250 (2-9)	F4IHK9_ARATH Cold, circadian rhythm, and rna binding 2 OS=Arabidopsis thaliana OX=3702 GN=GRP7 PE=1	2	ASGDVEYR	Ace-ASGDVEYR-COOH	8	66	43	Ace		Ace	2_ASGDVEYR
Q96270		LEA7_ARATH Late embryogenesis abundant protein 7 OS=Arabidopsis thaliana OX=3702 GN=LEA7 PE=2	60	DKTSQAAQTTQER	NH2-DK<But4C13>TSQAAQTTQER-COOH	13	70	46	NH2			60_DKTSQAAQTTQER
Q0WRA3		Q0WRA3_ARATH ATPase E1 OS=Arabidopsis thaliana OX=3702 GN=ATE1 PE=1	151	GEMEEDTDTKNDPMAR	NH2-GEM<Mox*>EEDTDTK<But4C13>NDPM<Mox*>AR-COOH	16	38	36	NH2			151_GEMEEDTDTKNDPMAR
Q39079		DNJ13_ARATH Chaperone protein dnaJ 13 OS=Arabidopsis thaliana OX=3702 GN=ATJ13 PE=1	1	MMGQEAAPTGPPNR	Ace-M<Mox*>M<Mox*>GQEAAPTGPPNR-COOH	14	55	41	Ace		Ace	1_MMGQEAAPTGPPNR
Q9SIN3		Q9SIN3_ARATH Late embryogenesis abundant domain-containing protein / LEA domain-containing protein OS=Arabidopsis thaliana OX=3702 GN=At2g42560 PE=4	308	MKETGSTAAEQAAR	NH2-M<Mox*>K<But4C13>ETGSTAAEQAAR-COOH	14	60	45	NH2			308_MKETGSTAAEQAAR
A0A178VPC5	Q6ID77 (1-12)	A0A178VPC5_ARATH Mediator of RNA polymerase II transcription subunit 11 OS=Arabidopsis thaliana OX=3702 GN=MED11 PE=3	1	MDPQTQNTSLQR	Ace-M<Mox*>DPQTQNTSLQR-COOH	12	74	43	Ace		Ace	1_MDPQTQNTSLQR
A0A1P8B543	F4JLA9 (120-135)^AQ96318 (120-135)	A0A1P8B543_ARATH Cruciferin 3 OS=Arabidopsis thaliana OX=3702 GN=CRU3 PE=1	120	SQPMQGQQQGQPWQGR	NH2-SQPM<Mox*>QGQQQGQPWQGR-COOH	16	90	43	NH2			120_SQPMQGQQQGQPWQGR
A0A1P8B543	F4JLA9 (137-154)^AQ96318 (137-154)	A0A1P8B543_ARATH Cruciferin 3 OS=Arabidopsis thaliana OX=3702 GN=CRU3 PE=1	137	GQQGQPWEGQGQQGQQGR	NH2-GQQGQPWEGQGQQGQQGR-COOH	18	81	42	NH2			137_GQQGQPWEGQGQQGQQGR
A0A1P8B543	F4JLA9 (137-154)^AQ96318 (137-154)	A0A1P8B543_ARATH Cruciferin 3 OS=Arabidopsis thaliana OX=3702 GN=CRU3 PE=1	137	GQQGQPWEGQGQQGQQGR	NH2-GQQGQPWEGQGQQGQQGR-COOH	18	68	42	NH2			137_GQQGQPWEGQGQQGQQGR
A0A1P8B543	F4JLA9 (136-154)^AQ96318 (136-154)	A0A1P8B543_ARATH Cruciferin 3 OS=Arabidopsis thaliana OX=3702 GN=CRU3 PE=1	136	QGQQGQPWEGQGQQGQQGR	NH2-QGQQGQPWEGQGQQGQQGR-COOH	19	84	42	NH2			136_QGQQGQPWEGQGQQGQQGR
A0A1P8B543	F4JLA9 (120-135)^AQ96318 (120-135)	A0A1P8B543_ARATH Cruciferin 3 OS=Arabidopsis thaliana OX=3702 GN=CRU3 PE=1	120	SQPMQGQQQGQPWQGR	NH2-SQPM<Mox*>QGQQQGQPWQGR-COOH	16	51	43	NH2			120_SQPMQGQQQGQPWQGR
Q9LD55		EIF3A_ARATH Eukaryotic translation initiation factor 3 subunit A OS=Arabidopsis thaliana OX=3702 GN=TIF3A1 PE=1	904	TTEVSGPSAPTSSETDR	NH2-TTEVSGPSAPTSSETDR-COOH	17	43	43	NH2			904_TTEVSGPSAPTSSETDR
A0A1P8BDB2	F4KGP6 (1-16)^AQ940P0 (1-16)	A0A1P8BDB2_ARATH Transcriptional activator (DUF662) OS=Arabidopsis thaliana OX=3702 GN=At5g03660 PE=1	1	MQPTETSQPAPSDQGR	Ace-M<Mox*>QPTETSQPAPSDQGR-COOH	16	79	40	Ace		Ace	1_MQPTETSQPAPSDQGR
A0A1P8B543	F4JLA9 (137-154)^AQ96318 (137-154)	A0A1P8B543_ARATH Cruciferin 3 OS=Arabidopsis thaliana OX=3702 GN=CRU3 PE=1	137	GQQGQPWEGQGQQGQQGR	But-GQQGQPWEGQGQQGQQGR-COOH	18	48	41	But			137_GQQGQPWEGQGQQGQQGR	But
A0A1P8B543	F4JLA9 (136-154)^AQ96318 (136-154)	A0A1P8B543_ARATH Cruciferin 3 OS=Arabidopsis thaliana OX=3702 GN=CRU3 PE=1	136	QGQQGQPWEGQGQQGQQGR	NH2-QGQQGQPWEGQGQQGQQGR-COOH	19	50	42	NH2			136_QGQQGQPWEGQGQQGQQGR
Q9FKP8		ZHD1_ARATH Zinc-finger homeodomain protein 1 OS=Arabidopsis thaliana OX=3702 GN=ZHD1 PE=1	175	SEDPMETSSAEAGGGIR	NH2-SEDPM<Mox*>ETSSAEAGGGIR-COOH	17	46	39	NH2			175_SEDPMETSSAEAGGGIR
A0A1P8B543	F4JLA9 (137-154)^AQ96318 (137-154)	A0A1P8B543_ARATH Cruciferin 3 OS=Arabidopsis thaliana OX=3702 GN=CRU3 PE=1	137	GQQGQPWEGQGQQGQQGR	NH2-GQQGQPWEGQGQQGQQGR-COOH	18	46	42	NH2			137_GQQGQPWEGQGQQGQQGR
Q9FKP8		ZHD1_ARATH Zinc-finger homeodomain protein 1 OS=Arabidopsis thaliana OX=3702 GN=ZHD1 PE=1	175	SEDPMETSSAEAGGGIR	NH2-SEDPM<Mox*>ETSSAEAGGGIR-COOH	17	53	39	NH2			175_SEDPMETSSAEAGGGIR
A0A1P8B543	F4JLA9 (136-154)^AQ96318 (136-154)	A0A1P8B543_ARATH Cruciferin 3 OS=Arabidopsis thaliana OX=3702 GN=CRU3 PE=1	136	QGQQGQPWEGQGQQGQQGR	But-QGQQGQPWEGQGQQGQQGR-COOH	19	55	41	But			136_QGQQGQPWEGQGQQGQQGR	But
A0A1P8B543	F4JLA9 (137-154)^AQ96318 (137-154)	A0A1P8B543_ARATH Cruciferin 3 OS=Arabidopsis thaliana OX=3702 GN=CRU3 PE=1	137	GQQGQPWEGQGQQGQQGR	NH2-GQQGQPWEGQGQQGQQGR-COOH	18	141	43	NH2			137_GQQGQPWEGQGQQGQQGR
A0A1P8B543	F4JLA9 (136-154)^AQ96318 (136-154)	A0A1P8B543_ARATH Cruciferin 3 OS=Arabidopsis thaliana OX=3702 GN=CRU3 PE=1	136	QGQQGQPWEGQGQQGQQGR	NH2-QGQQGQPWEGQGQQGQQGR-COOH	19	100	42	NH2			136_QGQQGQPWEGQGQQGQQGR
A0A1P8BDB2	F4KGP6 (1-16)^AQ940P0 (1-16)	A0A1P8BDB2_ARATH Transcriptional activator (DUF662) OS=Arabidopsis thaliana OX=3702 GN=At5g03660 PE=1	1	MQPTETSQPAPSDQGR	Ace-M<Mox*>QPTETSQPAPSDQGR-COOH	16	66	40	Ace		Ace	1_MQPTETSQPAPSDQGR
A0A1P8B543	F4JLA9 (119-154)^AQ96318 (119-154)	A0A1P8B543_ARATH Cruciferin 3 OS=Arabidopsis thaliana OX=3702 GN=CRU3 PE=1	119	DSQPMQGQQQGQPWQGRQGQQGQPWEGQGQQGQQGR	NH2-DSQPM<Mox*>QGQQQGQPWQGRQGQQGQPWEGQGQQGQQGR-COOH	36	40	40	NH2			119_DSQPMQGQQQGQPWQGRQGQQGQPWEGQGQQGQQGR
Q03251		RBG8_ARATH Glycine-rich RNA-binding protein 8 OS=Arabidopsis thaliana OX=3702 GN=RBG8 PE=1	103	SGGGGGYSGGGGGGYSGGGGGGYER	NH2-SGGGGGYSGGGGGGYSGGGGGGYER-COOH	25	81	34	NH2			103_SGGGGGYSGGGGGGYSGGGGGGYER
A0A1P8B543	F4JLA9 (121-154)^AQ96318 (121-154)	A0A1P8B543_ARATH Cruciferin 3 OS=Arabidopsis thaliana OX=3702 GN=CRU3 PE=1	121	QPMQGQQQGQPWQGRQGQQGQPWEGQGQQGQQGR	But4C13-QPM<Mox*>QGQQQGQPWQGRQGQQGQPWEGQGQQGQQGR-COOH	34	58	39	But4C13			121_QPMQGQQQGQPWQGRQGQQGQPWEGQGQQGQQGR	But
A0A1P8B543	F4JLA9 (137-154)^AQ96318 (137-154)	A0A1P8B543_ARATH Cruciferin 3 OS=Arabidopsis thaliana OX=3702 GN=CRU3 PE=1	137	GQQGQPWEGQGQQGQQGR	NH2-GQQGQPWEGQGQQGQQGR-COOH	18	95	42	NH2			137_GQQGQPWEGQGQQGQQGR
P15455	F4K8S2 (45-58)	CRU1_ARATH 12S seed storage protein CRA1 OS=Arabidopsis thaliana OX=3702 GN=CRA1 PE=1	232	LQTAQQLQNQDDNR	NH2-LQTAQQLQNQDDNR-COOH	14	76	45	NH2			232_LQTAQQLQNQDDNR
A0A1P8B543	F4JLA9 (142-154)^AQ96318 (142-154)	A0A1P8B543_ARATH Cruciferin 3 OS=Arabidopsis thaliana OX=3702 GN=CRU3 PE=1	142	PWEGQGQQGQQGR	NH2-PWEGQGQQGQQGR-COOH	13	109	44	NH2			142_PWEGQGQQGQQGR
A0A1P8B543	F4JLA9 (119-154)^AQ96318 (119-154)	A0A1P8B543_ARATH Cruciferin 3 OS=Arabidopsis thaliana OX=3702 GN=CRU3 PE=1	119	DSQPMQGQQQGQPWQGRQGQQGQPWEGQGQQGQQGR	NH2-DSQPM<Mox*>QGQQQGQPWQGRQGQQGQPWEGQGQQGQQGR-COOH	36	60	38	NH2			119_DSQPMQGQQQGQPWQGRQGQQGQPWEGQGQQGQQGR
A0A1P8B543	F4JLA9 (137-154)^AQ96318 (137-154)	A0A1P8B543_ARATH Cruciferin 3 OS=Arabidopsis thaliana OX=3702 GN=CRU3 PE=1	137	GQQGQPWEGQGQQGQQGR	NH2-GQQGQPWEGQGQQGQQGR-COOH	18	116	43	NH2			137_GQQGQPWEGQGQQGQQGR
Q03251		RBG8_ARATH Glycine-rich RNA-binding protein 8 OS=Arabidopsis thaliana OX=3702 GN=RBG8 PE=1	103	SGGGGGYSGGGGGGYSGGGGGGYER	NH2-SGGGGGYSGGGGGGYSGGGGGGYER-COOH	25	113	34	NH2			103_SGGGGGYSGGGGGGYSGGGGGGYER
A0A1P8B543	F4JLA9 (142-154)^AQ96318 (142-154)	A0A1P8B543_ARATH Cruciferin 3 OS=Arabidopsis thaliana OX=3702 GN=CRU3 PE=1	142	PWEGQGQQGQQGR	NH2-PWEGQGQQGQQGR-COOH	13	96	44	NH2			142_PWEGQGQQGQQGR
A0A1P8B543	F4JLA9 (138-154)^AQ96318 (138-154)	A0A1P8B543_ARATH Cruciferin 3 OS=Arabidopsis thaliana OX=3702 GN=CRU3 PE=1	138	QQGQPWEGQGQQGQQGR	But4C13-QQGQPWEGQGQQGQQGR-COOH	17	74	42	But4C13			138_QQGQPWEGQGQQGQQGR	But
A0A1P8B543	F4JLA9 (139-154)^AQ96318 (139-154)	A0A1P8B543_ARATH Cruciferin 3 OS=Arabidopsis thaliana OX=3702 GN=CRU3 PE=1	139	QGQPWEGQGQQGQQGR	NH2-QGQPWEGQGQQGQQGR-COOH	16	102	44	NH2			139_QGQPWEGQGQQGQQGR
Q9LF88		Y3304_ARATH Late embryogenesis abundant protein At3g53040 OS=Arabidopsis thaliana OX=3702 GN=At3g53040 PE=2	405	LTGATTPSDEETR	NH2-LTGATTPSDEETR-COOH	13	51	44	NH2			405_LTGATTPSDEETR
P15456		CRU2_ARATH 12S seed storage protein CRB OS=Arabidopsis thaliana OX=3702 GN=CRB PE=1	224	NVETAQQLQNQQDNR	NH2-NVETAQQLQNQQDNR-COOH	15	76	44	NH2			224_NVETAQQLQNQQDNR
A0A1P8B543	F4JLA9 (138-154)^AQ96318 (138-154)	A0A1P8B543_ARATH Cruciferin 3 OS=Arabidopsis thaliana OX=3702 GN=CRU3 PE=1	138	QQGQPWEGQGQQGQQGR	NH2-QQGQPWEGQGQQGQQGR-COOH	17	49	43	NH2			138_QQGQPWEGQGQQGQQGR
Q03251		RBG8_ARATH Glycine-rich RNA-binding protein 8 OS=Arabidopsis thaliana OX=3702 GN=RBG8 PE=1	103	SGGGGGYSGGGGGGYSGGGGGGYER	NH2-SGGGGGYSGGGGGGYSGGGGGGYER-COOH	25	183	35	NH2			103_SGGGGGYSGGGGGGYSGGGGGGYER
Q9C9I7		Q9C9I7_ARATH Rieske (2Fe-2S) domain-containing protein OS=Arabidopsis thaliana OX=3702 GN=PSB33 PE=2	64	EATEVSSSSSVSTPGR	NH2-EATEVSSSSSVSTPGR-COOH	16	62	44	NH2			64_EATEVSSSSSVSTPGR
A0A1P8BDB2	F4KGP6 (1-16)^AQ940P0 (1-16)	A0A1P8BDB2_ARATH Transcriptional activator (DUF662) OS=Arabidopsis thaliana OX=3702 GN=At5g03660 PE=1	1	MQPTETSQPAPSDQGR	Ace-M<Mox*>QPTETSQPAPSDQGR-COOH	16	44	40	Ace		Ace	1_MQPTETSQPAPSDQGR
Q03251		RBG8_ARATH Glycine-rich RNA-binding protein 8 OS=Arabidopsis thaliana OX=3702 GN=RBG8 PE=1	103	SGGGGGYSGGGGGGYSGGGGGGYER	NH2-SGGGGGYSGGGGGGYSGGGGGGYER-COOH	25	51	34	NH2			103_SGGGGGYSGGGGGGYSGGGGGGYER
Q84Y18		CXIP4_ARATH CAX-interacting protein 4 OS=Arabidopsis thaliana OX=3702 GN=CXIP4 PE=1	292	VAASSDSEANVSGDDVSR	NH2-VAASSDSEANVSGDDVSR-COOH	18	53	41	NH2			292_VAASSDSEANVSGDDVSR
Q03251		RBG8_ARATH Glycine-rich RNA-binding protein 8 OS=Arabidopsis thaliana OX=3702 GN=RBG8 PE=1	103	SGGGGGYSGGGGGGYSGGGGGGYER	NH2-SGGGGGYSGGGGGGYSGGGGGGYER-COOH	25	122	35	NH2			103_SGGGGGYSGGGGGGYSGGGGGGYER
A0A1P8B543	F4JLA9 (140-154)^AQ96318 (140-154)	A0A1P8B543_ARATH Cruciferin 3 OS=Arabidopsis thaliana OX=3702 GN=CRU3 PE=1	140	GQPWEGQGQQGQQGR	NH2-GQPWEGQGQQGQQGR-COOH	15	52	43	NH2			140_GQPWEGQGQQGQQGR
A0A1P8BDB2	F4KGP6 (1-16)^AQ940P0 (1-16)	A0A1P8BDB2_ARATH Transcriptional activator (DUF662) OS=Arabidopsis thaliana OX=3702 GN=At5g03660 PE=1	1	MQPTETSQPAPSDQGR	Ace-M<Mox*>QPTETSQPAPSDQGR-COOH	16	93	41	Ace		Ace	1_MQPTETSQPAPSDQGR
Q9SIN3		Q9SIN3_ARATH Late embryogenesis abundant domain-containing protein / LEA domain-containing protein OS=Arabidopsis thaliana OX=3702 GN=At2g42560 PE=4	268	GKEAGNMTAEQAAR	NH2-GK<But>EAGNM<Mox*>TAEQAAR-COOH	14	91	44	NH2			268_GKEAGNMTAEQAAR
Q3EDG6		Q3EDG6_ARATH Expressed protein OS=Arabidopsis thaliana OX=3702 GN=At1g07985 PE=2	32	SSSPSTPSSGTQPSSMDLSSPR	NH2-SSSPSTPSSGTQPSSM<Mox*>DLSSPR-COOH	22	92	41	NH2			32_SSSPSTPSSGTQPSSMDLSSPR
Q8W4D8		DDL_ARATH FHA domain-containing protein DDL OS=Arabidopsis thaliana OX=3702 GN=DDL PE=1	131	GGSEEPNVEEDSVAR	NH2-GGSEEPNVEEDSVAR-COOH	15	52	41	NH2			131_GGSEEPNVEEDSVAR
F4J573		F4J573_ARATH Late embryogenesis abundant protein (LEA) family protein OS=Arabidopsis thaliana OX=3702 GN=At3g17520 PE=4	260	DKASQSYDSAAR	NH2-DK<But>ASQSYDSAAR-COOH	12	55	44	NH2			260_DKASQSYDSAAR
Q93XY1		Q93XY1_ARATH At5g53620 OS=Arabidopsis thaliana OX=3702 GN=MNC6.16 PE=1	1	METAASSVATTR	Ace-M<Mox*>ETAASSVATTR-COOH	12	99	44	Ace		Ace	1_METAASSVATTR
Q8W034		RNP1_ARATH Heterogeneous nuclear ribonucleoprotein 1 OS=Arabidopsis thaliana OX=3702 GN=RNP1 PE=1	198	SMGGGGSGGYQGYGGNESSYDGR	NH2-SM<Mox*>GGGGSGGYQGYGGNESSYDGR-COOH	23	59	29	NH2			198_SMGGGGSGGYQGYGGNESSYDGR
A0A1P8B543	F4JLA9 (178-190)^AQ96318 (178-190)	A0A1P8B543_ARATH Cruciferin 3 OS=Arabidopsis thaliana OX=3702 GN=CRU3 PE=1	162	WEGQGQQGQQGFR	NH2-WEGQGQQGQQGFR-COOH	13	73	43	NH2			162_WEGQGQQGQQGFR
A0A1P8B543	F4JLA9 (136-153)^AQ96318 (136-153)	A0A1P8B543_ARATH Cruciferin 3 OS=Arabidopsis thaliana OX=3702 GN=CRU3 PE=1	136	QGQQGQPWEGQGQQGQQG	NH2-QGQQGQPWEGQGQQGQQG-COOH	18	46	40	NH2			136_QGQQGQPWEGQGQQGQQG
Q8W034		RNP1_ARATH Heterogeneous nuclear ribonucleoprotein 1 OS=Arabidopsis thaliana OX=3702 GN=RNP1 PE=1	198	SMGGGGSGGYQGYGGNESSYDGR	NH2-SM<Mox*>GGGGSGGYQGYGGNESSYDGR-COOH	23	144	30	NH2			198_SMGGGGSGGYQGYGGNESSYDGR
Q9LUJ7		PAP85_ARATH Vicilin-like seed storage protein At3g22640 OS=Arabidopsis thaliana OX=3702 GN=PAP85 PE=2	32	FEPPQQGEQEGPR	NH2-FEPPQQGEQEGPR-COOH	13	61	43	NH2			32_FEPPQQGEQEGPR
Q9SKP0		ECP63_ARATH Late embryogenesis abundant protein ECP63 OS=Arabidopsis thaliana OX=3702 GN=ECP63 PE=2	422	ASDQMTGQTFNDVGR	NH2-ASDQM<Mox*>TGQTFNDVGR-COOH	15	63	40	NH2			422_ASDQMTGQTFNDVGR
P15457		2SS1_ARATH 2S seed storage protein 1 OS=Arabidopsis thaliana OX=3702 GN=AT2S1 PE=1	60	QQLMLQQAR	NH2-QQLM<Mox*>LQQAR-COOH	9	51	45	NH2			60_QQLMLQQAR
F4J573		F4J573_ARATH Late embryogenesis abundant protein (LEA) family protein OS=Arabidopsis thaliana OX=3702 GN=At3g17520 PE=4	260	DKASQSYDSAAR	NH2-DK<But4C13>ASQSYDSAAR-COOH	12	59	44	NH2			260_DKASQSYDSAAR
P15455		CRU1_ARATH 12S seed storage protein CRA1 OS=Arabidopsis thaliana OX=3702 GN=CRA1 PE=1	46	PSHVLKSEAGR	NH2-PSHVLK<But>SEAGR-COOH	11	69	45	NH2			46_PSHVLKSEAGR
A0A1P8B543	F4JLA9 (137-154)^AQ96318 (137-154)	A0A1P8B543_ARATH Cruciferin 3 OS=Arabidopsis thaliana OX=3702 GN=CRU3 PE=1	137	GQQGQPWEGQGQQGQQGR	NH2-GQQGQPWEGQGQQGQQGR-COOH	18	99	42	NH2			137_GQQGQPWEGQGQQGQQGR
P15455		CRU1_ARATH 12S seed storage protein CRA1 OS=Arabidopsis thaliana OX=3702 GN=CRA1 PE=1	46	PSHVLKSEAGR	NH2-PSHVLK<But4C13>SEAGR-COOH	11	77	44	NH2			46_PSHVLKSEAGR
P15455		CRU1_ARATH 12S seed storage protein CRA1 OS=Arabidopsis thaliana OX=3702 GN=CRA1 PE=1	46	PSHVLKSEAGR	NH2-PSHVLK<But4C13>SEAGR-COOH	11	67	44	NH2			46_PSHVLKSEAGR
B6EUB6	F4ITZ0 (2-20)^AF4ITZ4 (2-20)^AF4ITZ6 (2-20)^AQ3EBK1 (2-20)^AQ9SLG0 (2-20)	B6EUB6_ARATH Nuclear factor Y, subunit B1 OS=Arabidopsis thaliana OX=3702 GN=NF-YB1 PE=1	2	ADTPSSPAGDGGESGGSVR	Ace-ADTPSSPAGDGGESGGSVR-COOH	19	108	40	Ace		Ace	2_ADTPSSPAGDGGESGGSVR
Q9FKT7		Q9FKT7_ARATH Glycine-rich protein / oleosin OS=Arabidopsis thaliana OX=3702 GN=MDA7.16 PE=2	131	DKSEDSYSTSSPSSR	NH2-DK<But4C13>SEDSYSTSSPSSR-COOH	15	103	41	NH2			131_DKSEDSYSTSSPSSR
Q9SKP0	A0A1P8B189 (3-10)	ECP63_ARATH Late embryogenesis abundant protein ECP63 OS=Arabidopsis thaliana OX=3702 GN=ECP63 PE=2	3	SDKQKAER	NH2-SDK<But4C13>QK<But4C13>AER-COOH	8	49	44	NH2			3_SDKQKAER
A0A2H1ZEH9	Q8H0X6 (46-57)	A0A2H1ZEH9_ARATH Cysteine proteinase inhibitor OS=Arabidopsis thaliana OX=3702 GN=CYSB PE=1	13	NQNSGEVESLAR	NH2-NQNSGEVESLAR-COOH	12	61	44	NH2			13_NQNSGEVESLAR
A0A1P8B543	Q96318 (318-325)	A0A1P8B543_ARATH Cruciferin 3 OS=Arabidopsis thaliana OX=3702 GN=CRU3 PE=1	302	PYESEEWR	NH2-PYESEEWR-COOH	8	63	41	NH2			302_PYESEEWR
P15455		CRU1_ARATH 12S seed storage protein CRA1 OS=Arabidopsis thaliana OX=3702 GN=CRA1 PE=1	45	EPSHVLKSEAGR	NH2-EPSHVLK<But>SEAGR-COOH	12	55	45	NH2			45_EPSHVLKSEAGR
P15458	P15459 (47-56)	2SS2_ARATH 2S seed storage protein 2 OS=Arabidopsis thaliana OX=3702 GN=AT2S2 PE=2	47	KEFQQSQHLR	NH2-K<But4C13>EFQQSQHLR-COOH	10	49	46	NH2			47_KEFQQSQHLR
Q94EG6		Y5224_ARATH Uncharacterized protein At5g02240 OS=Arabidopsis thaliana OX=3702 GN=At5g02240 PE=1	5	PTVLVTGASGR	NH2-PTVLVTGASGR-COOH	11	63	45	NH2			5_PTVLVTGASGR
Q9LMN4		LSM3A_ARATH Sm-like protein LSM3A OS=Arabidopsis thaliana OX=3702 GN=LSM3A PE=1	2	SVEEDATVR	Ace-SVEEDATVR-COOH	9	49	44	Ace		Ace	2_SVEEDATVR
Q94F49		H2A5_ARATH Probable histone H2A.5 OS=Arabidopsis thaliana OX=3702 GN=At5g27670 PE=1	1	MESSQATTKPTR	Ace-M<Mox*>ESSQATTK<But4C13>PTR-COOH	12	99	45	Ace		Ace	1_MESSQATTKPTR
Q9LKR3		MD37A_ARATH Mediator of RNA polymerase II transcription subunit 37a OS=Arabidopsis thaliana OX=3702 GN=MED37A PE=1	646	SGGAPGGAGGESSTEEEDESHDEL	NH2-SGGAPGGAGGESSTEEEDESHDEL-COOH	24	86	31	NH2			646_SGGAPGGAGGESSTEEEDESHDEL
Q9LFR9		Q9LFR9_ARATH COX assembly mitochondrial protein OS=Arabidopsis thaliana OX=3702 GN=At5g16060 PE=1	2	GSYVEQAR	Ace-GSYVEQAR-COOH	8	52	45	Ace		Ace	2_GSYVEQAR
A0A1P8B543	F4JLA9 (177-190)^AQ96318 (177-190)	A0A1P8B543_ARATH Cruciferin 3 OS=Arabidopsis thaliana OX=3702 GN=CRU3 PE=1	161	PWEGQGQQGQQGFR	NH2-PWEGQGQQGQQGFR-COOH	14	126	43	NH2			161_PWEGQGQQGQQGFR
P15455	F4K8S2 (107-115)	CRU1_ARATH 12S seed storage protein CRA1 OS=Arabidopsis thaliana OX=3702 GN=CRA1 PE=1	294	TDNLDDPSR	But-TDNLDDPSR-COOH	9	42	41	But			294_TDNLDDPSR	But
A0A1P8B7I6	F4JQF1 (286-301)	A0A1P8B7I6_ARATH Late embryogenesis abundant (LEA) protein OS=Arabidopsis thaliana OX=3702 GN=AP22.17 PE=4	292	DKANDAYESGSEAAGR	NH2-DK<But4C13>ANDAYESGSEAAGR-COOH	16	58	41	NH2			292_DKANDAYESGSEAAGR
A0A1P8B543	F4JLA9 (136-154)^AQ96318 (136-154)	A0A1P8B543_ARATH Cruciferin 3 OS=Arabidopsis thaliana OX=3702 GN=CRU3 PE=1	136	QGQQGQPWEGQGQQGQQGR	NH2-Q<Pyr>GQQGQPWEGQGQQGQQGR-COOH	19	86	41	NH2	Q<Pyr>		136_QGQQGQPWEGQGQQGQQGR
P55034		PSMD4_ARATH 26S proteasome non-ATPase regulatory subunit 4 homolog OS=Arabidopsis thaliana OX=3702 GN=RPN10 PE=1	256	DKDGDTASASQETVAR	NH2-DK<But4C13>DGDTASASQETVAR-COOH	16	88	44	NH2			256_DKDGDTASASQETVAR
A0A1P8B543	F4JLA9 (124-135)^AQ96318 (124-135)	A0A1P8B543_ARATH Cruciferin 3 OS=Arabidopsis thaliana OX=3702 GN=CRU3 PE=1	124	QGQQQGQPWQGR	NH2-Q<Pyr>GQQQGQPWQGR-COOH	12	52	44	NH2	Q<Pyr>		124_QGQQQGQPWQGR
Q3EDG6		Q3EDG6_ARATH Expressed protein OS=Arabidopsis thaliana OX=3702 GN=At1g07985 PE=2	32	SSSPSTPSSGTQPSSMDLSSPR	NH2-SSSPSTPSSGTQPSSM<Mox*>DLSSPR-COOH	22	94	40	NH2			32_SSSPSTPSSGTQPSSMDLSSPR
P15456		CRU2_ARATH 12S seed storage protein CRB OS=Arabidopsis thaliana OX=3702 GN=CRB PE=1	117	GEGQGQGQSQGFR	But-GEGQGQGQSQGFR-COOH	13	72	42	But			117_GEGQGQGQSQGFR	But
P15455	F4K8S2 (44-58)	CRU1_ARATH 12S seed storage protein CRA1 OS=Arabidopsis thaliana OX=3702 GN=CRA1 PE=1	231	DLQTAQQLQNQDDNR	NH2-DLQTAQQLQNQDDNR-COOH	15	52	43	NH2			231_DLQTAQQLQNQDDNR
A0A2H1ZEH9	Q8H0X6 (43-57)	A0A2H1ZEH9_ARATH Cysteine proteinase inhibitor OS=Arabidopsis thaliana OX=3702 GN=CYSB PE=1	10	VPANQNSGEVESLAR	NH2-VPANQNSGEVESLAR-COOH	15	100	45	NH2			10_VPANQNSGEVESLAR
F4J573		F4J573_ARATH Late embryogenesis abundant protein (LEA) family protein OS=Arabidopsis thaliana OX=3702 GN=At3g17520 PE=4	260	DKASQSYDSAAR	NH2-DK<But4C13>ASQSYDSAAR-COOH	12	45	44	NH2			260_DKASQSYDSAAR
Q9SZP8		IF4B3_ARATH Eukaryotic translation initiation factor 4B3 OS=Arabidopsis thaliana OX=3702 GN=EIF4B3 PE=1	243	DSQYGGGGGSESDTWGR	NH2-DSQYGGGGGSESDTWGR-COOH	17	73	35	NH2			243_DSQYGGGGGSESDTWGR
P15456		CRU2_ARATH 12S seed storage protein CRB OS=Arabidopsis thaliana OX=3702 GN=CRB PE=1	166	AAADLASNQNQLDR	NH2-AAADLASNQNQLDR-COOH	14	51	45	NH2			166_AAADLASNQNQLDR
A0A1P8B543	Q96318 (318-325)	A0A1P8B543_ARATH Cruciferin 3 OS=Arabidopsis thaliana OX=3702 GN=CRU3 PE=1	302	PYESEEWR	NH2-PYESEEWR-COOH	8	70	41	NH2			302_PYESEEWR
Q3EDG6		Q3EDG6_ARATH Expressed protein OS=Arabidopsis thaliana OX=3702 GN=At1g07985 PE=2	32	SSSPSTPSSGTQPSSMDLSSPR	NH2-SSSPSTPSSGTQPSSM<Mox*>DLSSPR-COOH	22	47	40	NH2			32_SSSPSTPSSGTQPSSMDLSSPR
P15456		CRU2_ARATH 12S seed storage protein CRB OS=Arabidopsis thaliana OX=3702 GN=CRB PE=1	223	INVETAQQLQNQQDNR	NH2-INVETAQQLQNQQDNR-COOH	16	112	45	NH2			223_INVETAQQLQNQQDNR
A0A1I9LNF1	F4K6P9 (1-9)^AQ38946 (1-9)^AQ43314 (1-9)^AQ9S7A0 (1-9)	A0A1I9LNF1_ARATH Glutamate dehydrogenase OS=Arabidopsis thaliana OX=3702 GN=GDH3 PE=3	1	MNALAATNR	Ace-M<Mox*>NALAATNR-COOH	9	58	45	Ace		Ace	1_MNALAATNR
A0A1P8B543	F4JLA9 (136-154)^AQ96318 (136-154)	A0A1P8B543_ARATH Cruciferin 3 OS=Arabidopsis thaliana OX=3702 GN=CRU3 PE=1	136	QGQQGQPWEGQGQQGQQGR	NH2-Q<Pyr>GQQGQPWEGQGQQGQQGR-COOH	19	112	41	NH2	Q<Pyr>		136_QGQQGQPWEGQGQQGQQGR
A0A1P8B543	F4JLA9 (136-154)^AQ96318 (136-154)	A0A1P8B543_ARATH Cruciferin 3 OS=Arabidopsis thaliana OX=3702 GN=CRU3 PE=1	136	QGQQGQPWEGQGQQGQQGR	NH2-Q<Pyr>GQQGQPWEGQGQQGQQGR-COOH	19	85	41	NH2	Q<Pyr>		136_QGQQGQPWEGQGQQGQQGR
Q94F49		H2A5_ARATH Probable histone H2A.5 OS=Arabidopsis thaliana OX=3702 GN=At5g27670 PE=1	1	MESSQATTKPTR	Ace-M<Mox*>ESSQATTK<But4C13>PTR-COOH	12	93	45	Ace		Ace	1_MESSQATTKPTR
Q9M2E0		RH12_ARATH DEAD-box ATP-dependent RNA helicase 12 OS=Arabidopsis thaliana OX=3702 GN=RH12 PE=2	32	QPPQDQQYVQR	NH2-Q<Pyr>PPQDQQYVQR-COOH	11	54	44	NH2	Q<Pyr>		32_QPPQDQQYVQR
A0A1P8B543	F4JLA9 (136-154)^AQ96318 (136-154)	A0A1P8B543_ARATH Cruciferin 3 OS=Arabidopsis thaliana OX=3702 GN=CRU3 PE=1	136	QGQQGQPWEGQGQQGQQGR	NH2-QGQQGQPWEGQGQQGQQGR-COOH	19	117	42	NH2			136_QGQQGQPWEGQGQQGQQGR
Q94F49		H2A5_ARATH Probable histone H2A.5 OS=Arabidopsis thaliana OX=3702 GN=At5g27670 PE=1	1	MESSQATTKPTR	Ace-M<Mox*>ESSQATTK<But4C13>PTR-COOH	12	99	45	Ace		Ace	1_MESSQATTKPTR
Q9M2E0		RH12_ARATH DEAD-box ATP-dependent RNA helicase 12 OS=Arabidopsis thaliana OX=3702 GN=RH12 PE=2	32	QPPQDQQYVQR	NH2-Q<Pyr>PPQDQQYVQR-COOH	11	76	44	NH2	Q<Pyr>		32_QPPQDQQYVQR
A0A1P8B543	F4JLA9 (136-154)^AQ96318 (136-154)	A0A1P8B543_ARATH Cruciferin 3 OS=Arabidopsis thaliana OX=3702 GN=CRU3 PE=1	136	QGQQGQPWEGQGQQGQQGR	NH2-QGQQGQPWEGQGQQGQQGR-COOH	19	107	42	NH2			136_QGQQGQPWEGQGQQGQQGR
A0A1P8B543	F4JLA9 (136-154)^AQ96318 (136-154)	A0A1P8B543_ARATH Cruciferin 3 OS=Arabidopsis thaliana OX=3702 GN=CRU3 PE=1	136	QGQQGQPWEGQGQQGQQGR	NH2-Q<Pyr>GQQGQPWEGQGQQGQQGR-COOH	19	114	41	NH2	Q<Pyr>		136_QGQQGQPWEGQGQQGQQGR
Q9M2E0		RH12_ARATH DEAD-box ATP-dependent RNA helicase 12 OS=Arabidopsis thaliana OX=3702 GN=RH12 PE=2	32	QPPQDQQYVQR	NH2-Q<Pyr>PPQDQQYVQR-COOH	11	63	44	NH2	Q<Pyr>		32_QPPQDQQYVQR
A0A1P8B543	F4JLA9 (136-154)^AQ96318 (136-154)	A0A1P8B543_ARATH Cruciferin 3 OS=Arabidopsis thaliana OX=3702 GN=CRU3 PE=1	136	QGQQGQPWEGQGQQGQQGR	NH2-Q<Pyr>GQQGQPWEGQGQQGQQGR-COOH	19	80	41	NH2	Q<Pyr>		136_QGQQGQPWEGQGQQGQQGR
Q9M2E0		RH12_ARATH DEAD-box ATP-dependent RNA helicase 12 OS=Arabidopsis thaliana OX=3702 GN=RH12 PE=2	32	QPPQDQQYVQR	NH2-Q<Pyr>PPQDQQYVQR-COOH	11	60	44	NH2	Q<Pyr>		32_QPPQDQQYVQR
Q9LUJ7		PAP85_ARATH Vicilin-like seed storage protein At3g22640 OS=Arabidopsis thaliana OX=3702 GN=PAP85 PE=2	31	EFEPPQQGEQEGPR	NH2-EFEPPQQGEQEGPR-COOH	14	57	42	NH2			31_EFEPPQQGEQEGPR
A0A1P8BF32	F4K007 (591-613)^AQ39043 (646-668)	A0A1P8BF32_ARATH Heat shock protein 70 (Hsp 70) family protein OS=Arabidopsis thaliana OX=3702 GN=BIP2 PE=1	651	SGGAPGAGGESSTEEEDESHDEL	NH2-SGGAPGAGGESSTEEEDESHDEL-COOH	23	71	30	NH2			651_SGGAPGAGGESSTEEEDESHDEL
A0A1P8B543	F4JLA9 (136-154)^AQ96318 (136-154)	A0A1P8B543_ARATH Cruciferin 3 OS=Arabidopsis thaliana OX=3702 GN=CRU3 PE=1	136	QGQQGQPWEGQGQQGQQGR	NH2-Q<Pyr>GQQGQPWEGQGQQGQQGR-COOH	19	110	41	NH2	Q<Pyr>		136_QGQQGQPWEGQGQQGQQGR
A0A1P8B543	F4JLA9 (136-154)^AQ96318 (136-154)	A0A1P8B543_ARATH Cruciferin 3 OS=Arabidopsis thaliana OX=3702 GN=CRU3 PE=1	136	QGQQGQPWEGQGQQGQQGR	NH2-Q<Pyr>GQQGQPWEGQGQQGQQGR-COOH	19	82	41	NH2	Q<Pyr>		136_QGQQGQPWEGQGQQGQQGR
Q9SR77		HBPL1_ARATH Heme-binding-like protein At3g10130, chloroplastic OS=Arabidopsis thaliana OX=3702 GN=At3g10130 PE=1	51	QPQSPAVSATESR	NH2-Q<Pyr>PQSPAVSATESR-COOH	13	59	45	NH2	Q<Pyr>		51_QPQSPAVSATESR
A0A1P8B543	F4JLA9 (136-154)^AQ96318 (136-154)	A0A1P8B543_ARATH Cruciferin 3 OS=Arabidopsis thaliana OX=3702 GN=CRU3 PE=1	136	QGQQGQPWEGQGQQGQQGR	NH2-QGQQGQPWEGQGQQGQQGR-COOH	19	102	43	NH2			136_QGQQGQPWEGQGQQGQQGR
A0A1P8B543	F4JLA9 (136-154)^AQ96318 (136-154)	A0A1P8B543_ARATH Cruciferin 3 OS=Arabidopsis thaliana OX=3702 GN=CRU3 PE=1	136	QGQQGQPWEGQGQQGQQGR	NH2-QGQQGQPWEGQGQQGQQGR-COOH	19	85	42	NH2			136_QGQQGQPWEGQGQQGQQGR
A0A1P8B543	F4JLA9 (136-154)^AQ96318 (136-154)	A0A1P8B543_ARATH Cruciferin 3 OS=Arabidopsis thaliana OX=3702 GN=CRU3 PE=1	136	QGQQGQPWEGQGQQGQQGR	NH2-QGQQGQPWEGQGQQGQQGR-COOH	19	72	43	NH2			136_QGQQGQPWEGQGQQGQQGR
A0A1P8B543	F4JLA9 (136-154)^AQ96318 (136-154)	A0A1P8B543_ARATH Cruciferin 3 OS=Arabidopsis thaliana OX=3702 GN=CRU3 PE=1	136	QGQQGQPWEGQGQQGQQGR	NH2-QGQQGQPWEGQGQQGQQGR-COOH	19	97	43	NH2			136_QGQQGQPWEGQGQQGQQGR
Q9LUJ7		PAP85_ARATH Vicilin-like seed storage protein At3g22640 OS=Arabidopsis thaliana OX=3702 GN=PAP85 PE=2	31	EFEPPQQGEQEGPR	NH2-EFEPPQQGEQEGPR-COOH	14	67	43	NH2			31_EFEPPQQGEQEGPR
A0A1P8B543	F4JLA9 (120-135)^AQ96318 (120-135)	A0A1P8B543_ARATH Cruciferin 3 OS=Arabidopsis thaliana OX=3702 GN=CRU3 PE=1	120	SQPMQGQQQGQPWQGR	NH2-SQPM<Mox*>QGQQQGQPWQGR-COOH	16	49	42	NH2			120_SQPMQGQQQGQPWQGR
A0A1P8B543	F4JLA9 (120-135)^AQ96318 (120-135)	A0A1P8B543_ARATH Cruciferin 3 OS=Arabidopsis thaliana OX=3702 GN=CRU3 PE=1	120	SQPMQGQQQGQPWQGR	NH2-SQPM<Mox*>QGQQQGQPWQGR-COOH	16	43	42	NH2			120_SQPMQGQQQGQPWQGR
A0A1P8B543	F4JLA9 (137-154)^AQ96318 (137-154)	A0A1P8B543_ARATH Cruciferin 3 OS=Arabidopsis thaliana OX=3702 GN=CRU3 PE=1	137	GQQGQPWEGQGQQGQQGR	NH2-GQQGQPWEGQGQQGQQGR-COOH	18	74	42	NH2			137_GQQGQPWEGQGQQGQQGR
P15456		CRU2_ARATH 12S seed storage protein CRB OS=Arabidopsis thaliana OX=3702 GN=CRB PE=1	395	TNENAQVNTLAGR	NH2-TNENAQVNTLAGR-COOH	13	87	45	NH2			395_TNENAQVNTLAGR
A0A1P8B543	F4JLA9 (139-154)^AQ96318 (139-154)	A0A1P8B543_ARATH Cruciferin 3 OS=Arabidopsis thaliana OX=3702 GN=CRU3 PE=1	139	QGQPWEGQGQQGQQGR	NH2-QGQPWEGQGQQGQQGR-COOH	16	90	42	NH2			139_QGQPWEGQGQQGQQGR
F4JY76		F4JY76_ARATH Eukaryotic translation initiation factor 3 subunit L OS=Arabidopsis thaliana OX=3702 GN=At5g25754 PE=1	2	ASSNEYEEGPGER	Ace-ASSNEYEEGPGER-COOH	13	46	37	Ace		Ace	2_ASSNEYEEGPGER
A0A1P8B543	F4JLA9 (136-154)^AQ96318 (136-154)	A0A1P8B543_ARATH Cruciferin 3 OS=Arabidopsis thaliana OX=3702 GN=CRU3 PE=1	136	QGQQGQPWEGQGQQGQQGR	NH2-QGQQGQPWEGQGQQGQQGR-COOH	19	62	42	NH2			136_QGQQGQPWEGQGQQGQQGR
A0A1P8B543	F4JLA9 (119-135)^AQ96318 (119-135)	A0A1P8B543_ARATH Cruciferin 3 OS=Arabidopsis thaliana OX=3702 GN=CRU3 PE=1	119	DSQPMQGQQQGQPWQGR	NH2-DSQPM<Mox*>QGQQQGQPWQGR-COOH	17	89	41	NH2			119_DSQPMQGQQQGQPWQGR
P15456		CRU2_ARATH 12S seed storage protein CRB OS=Arabidopsis thaliana OX=3702 GN=CRB PE=1	271	LEETLCTMR	NH2-LEETLC<Cmm*>TM<Mox*>R-COOH	9	50	43	NH2			271_LEETLCTMR
A0A1P8B543	F4JLA9 (136-154)^AQ96318 (136-154)	A0A1P8B543_ARATH Cruciferin 3 OS=Arabidopsis thaliana OX=3702 GN=CRU3 PE=1	136	QGQQGQPWEGQGQQGQQGR	NH2-QGQQGQPWEGQGQQGQQGR-COOH	19	81	43	NH2			136_QGQQGQPWEGQGQQGQQGR
Q9FFR3		6PGD3_ARATH 6-phosphogluconate dehydrogenase, decarboxylating 3, chloroplastic OS=Arabidopsis thaliana OX=3702 GN=PGD3 PE=1	1	MESVALSR	Ace-M<Mox*>ESVALSR-COOH	8	61	45	Ace		Ace	1_MESVALSR
Q9LUJ7		PAP85_ARATH Vicilin-like seed storage protein At3g22640 OS=Arabidopsis thaliana OX=3702 GN=PAP85 PE=2	31	EFEPPQQGEQEGPR	NH2-EFEPPQQGEQEGPR-COOH	14	67	42	NH2			31_EFEPPQQGEQEGPR
A0A1P8B543	F4JLA9 (139-154)^AQ96318 (139-154)	A0A1P8B543_ARATH Cruciferin 3 OS=Arabidopsis thaliana OX=3702 GN=CRU3 PE=1	139	QGQPWEGQGQQGQQGR	NH2-Q<Pyr>GQPWEGQGQQGQQGR-COOH	16	81	42	NH2	Q<Pyr>		139_QGQPWEGQGQQGQQGR
F4JLA9	Q96318 (151-170)	F4JLA9_ARATH Cruciferin 3 OS=Arabidopsis thaliana OX=3702 GN=CRU3 PE=1	151	QQGRQGQPWEGQGQQGQQGR	NH2-Q<Pyr>QGRQGQPWEGQGQQGQQGR-COOH	20	46	43	NH2	Q<Pyr>		151_QQGRQGQPWEGQGQQGQQGR
A0A1P8B543	F4JLA9 (125-154)^AQ96318 (125-154)	A0A1P8B543_ARATH Cruciferin 3 OS=Arabidopsis thaliana OX=3702 GN=CRU3 PE=1	125	GQQQGQPWQGRQGQQGQPWEGQGQQGQQGR	NH2-GQQQGQPWQGRQGQQGQPWEGQGQQGQQGR-COOH	30	48	42	NH2			125_GQQQGQPWQGRQGQQGQPWEGQGQQGQQGR
F4JLA9	Q96318 (151-170)	F4JLA9_ARATH Cruciferin 3 OS=Arabidopsis thaliana OX=3702 GN=CRU3 PE=1	151	QQGRQGQPWEGQGQQGQQGR	NH2-Q<Pyr>QGRQGQPWEGQGQQGQQGR-COOH	20	53	42	NH2	Q<Pyr>		151_QQGRQGQPWEGQGQQGQQGR
A0A1P8B543	F4JLA9 (125-154)^AQ96318 (125-154)	A0A1P8B543_ARATH Cruciferin 3 OS=Arabidopsis thaliana OX=3702 GN=CRU3 PE=1	125	GQQQGQPWQGRQGQQGQPWEGQGQQGQQGR	NH2-GQQQGQPWQGRQGQQGQPWEGQGQQGQQGR-COOH	30	60	40	NH2			125_GQQQGQPWQGRQGQQGQPWEGQGQQGQQGR
P15455	F4K8S2 (221-233)	CRU1_ARATH 12S seed storage protein CRA1 OS=Arabidopsis thaliana OX=3702 GN=CRA1 PE=1	408	TNANAQINTLAGR	NH2-TNANAQINTLAGR-COOH	13	114	46	NH2			408_TNANAQINTLAGR
A0A1P8B543	F4JLA9 (136-154)^AQ96318 (136-154)	A0A1P8B543_ARATH Cruciferin 3 OS=Arabidopsis thaliana OX=3702 GN=CRU3 PE=1	136	QGQQGQPWEGQGQQGQQGR	NH2-QGQQGQPWEGQGQQGQQGR-COOH	19	103	43	NH2			136_QGQQGQPWEGQGQQGQQGR
P15455	F4K8S2 (106-115)	CRU1_ARATH 12S seed storage protein CRA1 OS=Arabidopsis thaliana OX=3702 GN=CRA1 PE=1	293	CTDNLDDPSR	NH2-C<Cmm*>TDNLDDPSR-COOH	10	45	38	NH2			293_CTDNLDDPSR
A0A1P8B543	Q96318 (318-325)	A0A1P8B543_ARATH Cruciferin 3 OS=Arabidopsis thaliana OX=3702 GN=CRU3 PE=1	302	PYESEEWR	NH2-PYESEEWR-COOH	8	53	42	NH2			302_PYESEEWR
A0A1P8B543	F4JLA9 (139-154)^AQ96318 (139-154)	A0A1P8B543_ARATH Cruciferin 3 OS=Arabidopsis thaliana OX=3702 GN=CRU3 PE=1	139	QGQPWEGQGQQGQQGR	NH2-QGQPWEGQGQQGQQGR-COOH	16	103	43	NH2			139_QGQPWEGQGQQGQQGR
F4JLA9	Q96318 (146-170)	F4JLA9_ARATH Cruciferin 3 OS=Arabidopsis thaliana OX=3702 GN=CRU3 PE=1	146	QGQQGQQGRQGQPWEGQGQQGQQGR	NH2-QGQQGQQGRQGQPWEGQGQQGQQGR-COOH	25	48	43	NH2			146_QGQQGQQGRQGQPWEGQGQQGQQGR
P15455	F4K8S2 (221-233)	CRU1_ARATH 12S seed storage protein CRA1 OS=Arabidopsis thaliana OX=3702 GN=CRA1 PE=1	408	TNANAQINTLAGR	NH2-TNANAQINTLAGR-COOH	13	101	46	NH2			408_TNANAQINTLAGR
A0A1P8B543	F4JLA9 (139-154)^AQ96318 (139-154)	A0A1P8B543_ARATH Cruciferin 3 OS=Arabidopsis thaliana OX=3702 GN=CRU3 PE=1	139	QGQPWEGQGQQGQQGR	NH2-QGQPWEGQGQQGQQGR-COOH	16	105	43	NH2			139_QGQPWEGQGQQGQQGR
Q93W05		Q93W05_ARATH At1g10590/F20B24_1 OS=Arabidopsis thaliana OX=3702 GN=At1g10590 PE=1	2	AEATSALR	Ace-AEATSALR-COOH	8	72	47	Ace		Ace	2_AEATSALR
A0A1P8B543	F4JLA9 (121-154)^AQ96318 (121-154)	A0A1P8B543_ARATH Cruciferin 3 OS=Arabidopsis thaliana OX=3702 GN=CRU3 PE=1	121	QPMQGQQQGQPWQGRQGQQGQPWEGQGQQGQQGR	NH2-Q<Pyr>PM<Mox*>QGQQQGQPWQGRQGQQGQPWEGQGQQGQQGR-COOH	34	56	38	NH2	Q<Pyr>		121_QPMQGQQQGQPWQGRQGQQGQPWEGQGQQGQQGR
A0A1P8B543	F4JLA9 (121-154)^AQ96318 (121-154)	A0A1P8B543_ARATH Cruciferin 3 OS=Arabidopsis thaliana OX=3702 GN=CRU3 PE=1	121	QPMQGQQQGQPWQGRQGQQGQPWEGQGQQGQQGR	NH2-QPM<Mox*>QGQQQGQPWQGRQGQQGQPWEGQGQQGQQGR-COOH	34	64	39	NH2			121_QPMQGQQQGQPWQGRQGQQGQPWEGQGQQGQQGR
A0A1P8B543	F4JLA9 (136-154)^AQ96318 (136-154)	A0A1P8B543_ARATH Cruciferin 3 OS=Arabidopsis thaliana OX=3702 GN=CRU3 PE=1	136	QGQQGQPWEGQGQQGQQGR	NH2-Q<Pyr>GQQGQPWEGQGQQGQQGR-COOH	19	87	41	NH2	Q<Pyr>		136_QGQQGQPWEGQGQQGQQGR
A0A1P8B543	F4JLA9 (136-154)^AQ96318 (136-154)	A0A1P8B543_ARATH Cruciferin 3 OS=Arabidopsis thaliana OX=3702 GN=CRU3 PE=1	136	QGQQGQPWEGQGQQGQQGR	NH2-Q<Pyr>GQQGQPWEGQGQQGQQGR-COOH	19	113	41	NH2	Q<Pyr>		136_QGQQGQPWEGQGQQGQQGR
A0A1P8B543	F4JLA9 (136-154)^AQ96318 (136-154)	A0A1P8B543_ARATH Cruciferin 3 OS=Arabidopsis thaliana OX=3702 GN=CRU3 PE=1	136	QGQQGQPWEGQGQQGQQGR	NH2-QGQQGQPWEGQGQQGQQGR-COOH	19	85	43	NH2			136_QGQQGQPWEGQGQQGQQGR
Q9FFR3		6PGD3_ARATH 6-phosphogluconate dehydrogenase, decarboxylating 3, chloroplastic OS=Arabidopsis thaliana OX=3702 GN=PGD3 PE=1	1	MESVALSR	Ace-M<Mox*>ESVALSR-COOH	8	77	45	Ace		Ace	1_MESVALSR
Q9LUJ7		PAP85_ARATH Vicilin-like seed storage protein At3g22640 OS=Arabidopsis thaliana OX=3702 GN=PAP85 PE=2	31	EFEPPQQGEQEGPR	NH2-EFEPPQQGEQEGPR-COOH	14	68	43	NH2			31_EFEPPQQGEQEGPR
A0A1P8B543	F4JLA9 (139-154)^AQ96318 (139-154)	A0A1P8B543_ARATH Cruciferin 3 OS=Arabidopsis thaliana OX=3702 GN=CRU3 PE=1	139	QGQPWEGQGQQGQQGR	NH2-Q<Pyr>GQPWEGQGQQGQQGR-COOH	16	106	42	NH2	Q<Pyr>		139_QGQPWEGQGQQGQQGR
A0A1P8B543	F4JLA9 (136-154)^AQ96318 (136-154)	A0A1P8B543_ARATH Cruciferin 3 OS=Arabidopsis thaliana OX=3702 GN=CRU3 PE=1	136	QGQQGQPWEGQGQQGQQGR	NH2-QGQQGQPWEGQGQQGQQGR-COOH	19	100	43	NH2			136_QGQQGQPWEGQGQQGQQGR
A0A1P8B543	F4JLA9 (139-154)^AQ96318 (139-154)	A0A1P8B543_ARATH Cruciferin 3 OS=Arabidopsis thaliana OX=3702 GN=CRU3 PE=1	139	QGQPWEGQGQQGQQGR	NH2-QGQPWEGQGQQGQQGR-COOH	16	105	43	NH2			139_QGQPWEGQGQQGQQGR
A0A1P8B543	Q96318 (318-325)	A0A1P8B543_ARATH Cruciferin 3 OS=Arabidopsis thaliana OX=3702 GN=CRU3 PE=1	302	PYESEEWR	NH2-PYESEEWR-COOH	8	61	42	NH2			302_PYESEEWR
Q9ZVX8		PIP28_ARATH Probable aquaporin PIP2-8 OS=Arabidopsis thaliana OX=3702 GN=PIP2-8 PE=1	2	SKEVSEEGR	Ace-SK<But4C13>EVSEEGR-COOH	9	54	45	Ace		Ace	2_SKEVSEEGR
Q93W05		Q93W05_ARATH At1g10590/F20B24_1 OS=Arabidopsis thaliana OX=3702 GN=At1g10590 PE=1	2	AEATSALR	Ace-AEATSALR-COOH	8	86	47	Ace		Ace	2_AEATSALR
A0A1P8B543	F4JLA9 (136-154)^AQ96318 (136-154)	A0A1P8B543_ARATH Cruciferin 3 OS=Arabidopsis thaliana OX=3702 GN=CRU3 PE=1	136	QGQQGQPWEGQGQQGQQGR	NH2-Q<Pyr>GQQGQPWEGQGQQGQQGR-COOH	19	67	41	NH2	Q<Pyr>		136_QGQQGQPWEGQGQQGQQGR
F4I116		SYLC_ARATH Leucine--tRNA ligase, cytoplasmic OS=Arabidopsis thaliana OX=3702 GN=At1g09620 PE=1	2	ASESKSYAR	Ace-ASESK<But4C13>SYAR-COOH	9	52	45	Ace		Ace	2_ASESKSYAR
A0A1P8B543	F4JLA9 (136-154)^AQ96318 (136-154)	A0A1P8B543_ARATH Cruciferin 3 OS=Arabidopsis thaliana OX=3702 GN=CRU3 PE=1	136	QGQQGQPWEGQGQQGQQGR	NH2-Q<Pyr>GQQGQPWEGQGQQGQQGR-COOH	19	58	41	NH2	Q<Pyr>		136_QGQQGQPWEGQGQQGQQGR
Q9SL09		Q9SL09_ARATH Glycine-rich protein family OS=Arabidopsis thaliana OX=3702 GN=At2g05580 PE=4	164	GGGGQGGQKGGGGQGGQKGGGGQGGQKGGGGR	NH2-GGGGQGGQK<But4C13>GGGGQGGQK<But4C13>GGGGQGGQK<But4C13>GGGGR-COOH	32	47	45	NH2			164_GGGGQGGQKGGGGQGGQKGGGGQGGQKGGGGR
Q9LW12		LEA29_ARATH Late embryogenesis abundant protein 29 OS=Arabidopsis thaliana OX=3702 GN=LEA29 PE=2	2	ASNQQSYKAGETR	Ace-ASNQQSYK<But4C13>AGETR-COOH	13	71	44	Ace		Ace	2_ASNQQSYKAGETR
Q5XF75		EFTS_ARATH Elongation factor Ts, mitochondrial OS=Arabidopsis thaliana OX=3702 GN=EFTS PE=1	384	LEASDEPVAQTA	NH2-LEASDEPVAQTA-COOH	12	58	44	NH2			384_LEASDEPVAQTA
Q56YA5		SGAT_ARATH Serine--glyoxylate aminotransferase OS=Arabidopsis thaliana OX=3702 GN=AGT1 PE=1	1	MDYMYGPGR	Ace-M<Mox*>DYM<Mox*>YGPGR-COOH	9	54	35	Ace		Ace	1_MDYMYGPGR
P15455	F4K8S2 (106-115)	CRU1_ARATH 12S seed storage protein CRA1 OS=Arabidopsis thaliana OX=3702 GN=CRA1 PE=1	293	CTDNLDDPSR	NH2-C<Cmm*>TDNLDDPSR-COOH	10	40	38	NH2			293_CTDNLDDPSR
F4JLA9	Q96318 (143-170)	F4JLA9_ARATH Cruciferin 3 OS=Arabidopsis thaliana OX=3702 GN=CRU3 PE=1	143	WEGQGQQGQQGRQGQPWEGQGQQGQQGR	But4C13-WEGQGQQGQQGRQGQPWEGQGQQGQQGR-COOH	28	67	39	But4C13			143_WEGQGQQGQQGRQGQPWEGQGQQGQQGR	But
A0A1P8B7I6	F4JQF1 (286-301)	A0A1P8B7I6_ARATH Late embryogenesis abundant (LEA) protein OS=Arabidopsis thaliana OX=3702 GN=AP22.17 PE=4	292	DKANDAYESGSEAAGR	NH2-DK<But4C13>ANDAYESGSEAAGR-COOH	16	66	42	NH2			292_DKANDAYESGSEAAGR
A0A1P8B543	F4JLA9 (139-154)^AQ96318 (139-154)	A0A1P8B543_ARATH Cruciferin 3 OS=Arabidopsis thaliana OX=3702 GN=CRU3 PE=1	139	QGQPWEGQGQQGQQGR	NH2-Q<Pyr>GQPWEGQGQQGQQGR-COOH	16	106	42	NH2	Q<Pyr>		139_QGQPWEGQGQQGQQGR
A0A1P8B543	F4JLA9 (139-154)^AQ96318 (139-154)	A0A1P8B543_ARATH Cruciferin 3 OS=Arabidopsis thaliana OX=3702 GN=CRU3 PE=1	139	QGQPWEGQGQQGQQGR	NH2-QGQPWEGQGQQGQQGR-COOH	16	102	43	NH2			139_QGQPWEGQGQQGQQGR
Q93W05		Q93W05_ARATH At1g10590/F20B24_1 OS=Arabidopsis thaliana OX=3702 GN=At1g10590 PE=1	2	AEATSALR	Ace-AEATSALR-COOH	8	71	47	Ace		Ace	2_AEATSALR
F4I4X6	Q9FR53 (2-12)	F4I4X6_ARATH Serine/threonine-protein kinase TOR OS=Arabidopsis thaliana OX=3702 GN=TOR PE=3	2	STSSQSFVAGR	Ace-STSSQSFVAGR-COOH	11	68	45	Ace		Ace	2_STSSQSFVAGR
A0A1P8B543	F4JLA9 (139-154)^AQ96318 (139-154)	A0A1P8B543_ARATH Cruciferin 3 OS=Arabidopsis thaliana OX=3702 GN=CRU3 PE=1	139	QGQPWEGQGQQGQQGR	NH2-QGQPWEGQGQQGQQGR-COOH	16	83	44	NH2			139_QGQPWEGQGQQGQQGR
A0A1P8B543	F4JLA9 (123-135)^AQ96318 (123-135)	A0A1P8B543_ARATH Cruciferin 3 OS=Arabidopsis thaliana OX=3702 GN=CRU3 PE=1	123	MQGQQQGQPWQGR	But4C13-M<Mox*>QGQQQGQPWQGR-COOH	13	66	42	But4C13			123_MQGQQQGQPWQGR	But
Q9LW12		LEA29_ARATH Late embryogenesis abundant protein 29 OS=Arabidopsis thaliana OX=3702 GN=LEA29 PE=2	2	ASNQQSYKAGETR	Ace-ASNQQSYK<But4C13>AGETR-COOH	13	76	44	Ace		Ace	2_ASNQQSYKAGETR
Q56YA5		SGAT_ARATH Serine--glyoxylate aminotransferase OS=Arabidopsis thaliana OX=3702 GN=AGT1 PE=1	1	MDYMYGPGR	Ace-M<Mox*>DYM<Mox*>YGPGR-COOH	9	56	35	Ace		Ace	1_MDYMYGPGR
P15455	F4K8S2 (106-115)	CRU1_ARATH 12S seed storage protein CRA1 OS=Arabidopsis thaliana OX=3702 GN=CRA1 PE=1	293	CTDNLDDPSR	NH2-C<Cmm*>TDNLDDPSR-COOH	10	39	38	NH2			293_CTDNLDDPSR
Q56YA5		SGAT_ARATH Serine--glyoxylate aminotransferase OS=Arabidopsis thaliana OX=3702 GN=AGT1 PE=1	1	MDYMYGPGR	Ace-M<Mox*>DYM<Mox*>YGPGR-COOH	9	50	34	Ace		Ace	1_MDYMYGPGR
Q93W05		Q93W05_ARATH At1g10590/F20B24_1 OS=Arabidopsis thaliana OX=3702 GN=At1g10590 PE=1	2	AEATSALR	Ace-AEATSALR-COOH	8	75	47	Ace		Ace	2_AEATSALR
Q9ZWA9		CRU4_ARATH 12S seed storage protein CRD OS=Arabidopsis thaliana OX=3702 GN=CRD PE=1	436	FSQQETMLSMTPSSSS	NH2-FSQQETM<Mox*>LSM<Mox*>TPSSSS-COOH	16	39	37	NH2			436_FSQQETMLSMTPSSSS
A0A1P8B543	F4JLA9 (136-154)^AQ96318 (136-154)	A0A1P8B543_ARATH Cruciferin 3 OS=Arabidopsis thaliana OX=3702 GN=CRU3 PE=1	136	QGQQGQPWEGQGQQGQQGR	NH2-Q<Pyr>GQQGQPWEGQGQQGQQGR-COOH	19	93	40	NH2	Q<Pyr>		136_QGQQGQPWEGQGQQGQQGR
A2RVK1	Q9SIZ2 (2-11)	A2RVK1_ARATH At2g40290 OS=Arabidopsis thaliana OX=3702 GN=At2g40290 PE=1	2	ASQTPNLECR	Ace-ASQTPNLEC<Cmm*>R-COOH	10	57	43	Ace		Ace	2_ASQTPNLECR
A0A1P8B543	F4JLA9 (136-154)^AQ96318 (136-154)	A0A1P8B543_ARATH Cruciferin 3 OS=Arabidopsis thaliana OX=3702 GN=CRU3 PE=1	136	QGQQGQPWEGQGQQGQQGR	NH2-QGQQGQPWEGQGQQGQQGR-COOH	19	75	42	NH2			136_QGQQGQPWEGQGQQGQQGR
Q7Y175		PUX5_ARATH Plant UBX domain-containing protein 5 OS=Arabidopsis thaliana OX=3702 GN=PUX5 PE=1	211	LLSGEAVSSSPQQQQQEQPQR	NH2-LLSGEAVSSSPQQQQQEQPQR-COOH	21	103	45	NH2			211_LLSGEAVSSSPQQQQQEQPQR
Q7Y175		PUX5_ARATH Plant UBX domain-containing protein 5 OS=Arabidopsis thaliana OX=3702 GN=PUX5 PE=1	211	LLSGEAVSSSPQQQQQEQPQR	NH2-LLSGEAVSSSPQQQQQEQPQR-COOH	21	79	45	NH2			211_LLSGEAVSSSPQQQQQEQPQR
A0A1P8B543	F4JLA9 (136-154)^AQ96318 (136-154)	A0A1P8B543_ARATH Cruciferin 3 OS=Arabidopsis thaliana OX=3702 GN=CRU3 PE=1	136	QGQQGQPWEGQGQQGQQGR	NH2-Q<Pyr>GQQGQPWEGQGQQGQQGR-COOH	19	68	40	NH2	Q<Pyr>		136_QGQQGQPWEGQGQQGQQGR
Q0WRA3		Q0WRA3_ARATH ATPase E1 OS=Arabidopsis thaliana OX=3702 GN=ATE1 PE=1	65	EDASAAMDNMDGAELYGR	NH2-EDASAAM<Mox*>DNM<Mox*>DGAELYGR-COOH	18	95	32	NH2			65_EDASAAMDNMDGAELYGR
A0A1P8B543	F4JLA9 (137-154)^AQ96318 (137-154)	A0A1P8B543_ARATH Cruciferin 3 OS=Arabidopsis thaliana OX=3702 GN=CRU3 PE=1	137	GQQGQPWEGQGQQGQQGR	But4C13-GQQGQPWEGQGQQGQQGR-COOH	18	44	42	But4C13			137_GQQGQPWEGQGQQGQQGR	But
F4I9U2	F4I9U3 (2-17)^AQ84WS6 (2-17)	F4I9U2_ARATH Nucleolin OS=Arabidopsis thaliana OX=3702 GN=At1g65090 PE=4	2	SQTMEEYQSNESEDKR	Ace-SQTM<Mox*>EEYQSNESEDK<But4C13>R-COOH	16	52	37	Ace		Ace	2_SQTMEEYQSNESEDKR
A0A2H1ZEH9	Q8H0X6 (43-57)	A0A2H1ZEH9_ARATH Cysteine proteinase inhibitor OS=Arabidopsis thaliana OX=3702 GN=CYSB PE=1	10	VPANQNSGEVESLAR	NH2-VPANQNSGEVESLAR-COOH	15	59	45	NH2			10_VPANQNSGEVESLAR
A8MQL1	A8MR11 (2-13)^AF4I476 (2-13)	TRF1B_ARATH TNF receptor-associated factor homolog 1b OS=Arabidopsis thaliana OX=3702 GN=TRAF1B PE=1	2	AEAVDEDSGVGR	Ace-AEAVDEDSGVGR-COOH	12	64	42	Ace		Ace	2_AEAVDEDSGVGR
Q9LW12		LEA29_ARATH Late embryogenesis abundant protein 29 OS=Arabidopsis thaliana OX=3702 GN=LEA29 PE=2	2	ASNQQSYKAGETR	Ace-ASNQQSYK<But4C13>AGETR-COOH	13	57	45	Ace		Ace	2_ASNQQSYKAGETR
Q9ZWA9		CRU4_ARATH 12S seed storage protein CRD OS=Arabidopsis thaliana OX=3702 GN=CRD PE=1	436	FSQQETMLSMTPSSSS	NH2-FSQQETM<Mox*>LSM<Mox*>TPSSSS-COOH	16	40	37	NH2			436_FSQQETMLSMTPSSSS
P06525		ADH1_ARATH Alcohol dehydrogenase class-P OS=Arabidopsis thaliana OX=3702 GN=ADH1 PE=1	2	STTGQIIR	Ace-STTGQIIR-COOH	8	63	46	Ace		Ace	2_STTGQIIR
A0A2H1ZEH9	Q8H0X6 (43-57)	A0A2H1ZEH9_ARATH Cysteine proteinase inhibitor OS=Arabidopsis thaliana OX=3702 GN=CYSB PE=1	10	VPANQNSGEVESLAR	NH2-VPANQNSGEVESLAR-COOH	15	107	45	NH2			10_VPANQNSGEVESLAR
A0A1P8B543	F4JLA9 (121-135)^AQ96318 (121-135)	A0A1P8B543_ARATH Cruciferin 3 OS=Arabidopsis thaliana OX=3702 GN=CRU3 PE=1	121	QPMQGQQQGQPWQGR	NH2-Q<Pyr>PM<Mox*>QGQQQGQPWQGR-COOH	15	55	42	NH2	Q<Pyr>		121_QPMQGQQQGQPWQGR
Q9SIN3		Q9SIN3_ARATH Late embryogenesis abundant domain-containing protein / LEA domain-containing protein OS=Arabidopsis thaliana OX=3702 GN=At2g42560 PE=4	250	GSATSEKAQR	But4C13-GSATSEK<But4C13>AQR-COOH	10	49	45	But4C13			250_GSATSEKAQR	But
P15456		CRU2_ARATH 12S seed storage protein CRB OS=Arabidopsis thaliana OX=3702 GN=CRB PE=1	395	TNENAQVNTLAGR	NH2-TNENAQVNTLAGR-COOH	13	71	45	NH2			395_TNENAQVNTLAGR
A0A1P8B543	F4JLA9 (121-135)^AQ96318 (121-135)	A0A1P8B543_ARATH Cruciferin 3 OS=Arabidopsis thaliana OX=3702 GN=CRU3 PE=1	121	QPMQGQQQGQPWQGR	NH2-QPM<Mox*>QGQQQGQPWQGR-COOH	15	76	43	NH2			121_QPMQGQQQGQPWQGR
Q9SIN3		Q9SIN3_ARATH Late embryogenesis abundant domain-containing protein / LEA domain-containing protein OS=Arabidopsis thaliana OX=3702 GN=At2g42560 PE=4	304	ASEYMKETGSTAAEQAAR	NH2-ASEYM<Mox*>K<But4C13>ETGSTAAEQAAR-COOH	18	89	43	NH2			304_ASEYMKETGSTAAEQAAR
Q9LW12		LEA29_ARATH Late embryogenesis abundant protein 29 OS=Arabidopsis thaliana OX=3702 GN=LEA29 PE=2	2	ASNQQSYKAGETR	Ace-ASNQQSYK<But4C13>AGETR-COOH	13	83	44	Ace		Ace	2_ASNQQSYKAGETR
Q9LW12		LEA29_ARATH Late embryogenesis abundant protein 29 OS=Arabidopsis thaliana OX=3702 GN=LEA29 PE=2	2	ASNQQSYKAGETR	Ace-ASNQQSYK<But>AGETR-COOH	13	85	45	Ace		Ace	2_ASNQQSYKAGETR
Q93W05		Q93W05_ARATH At1g10590/F20B24_1 OS=Arabidopsis thaliana OX=3702 GN=At1g10590 PE=1	2	AEATSALR	Ace-AEATSALR-COOH	8	49	47	Ace		Ace	2_AEATSALR
Q9SIN3		Q9SIN3_ARATH Late embryogenesis abundant domain-containing protein / LEA domain-containing protein OS=Arabidopsis thaliana OX=3702 GN=At2g42560 PE=4	304	ASEYMKETGSTAAEQAAR	NH2-ASEYM<Mox*>K<But4C13>ETGSTAAEQAAR-COOH	18	60	43	NH2			304_ASEYMKETGSTAAEQAAR
A0A1P8B543	F4JLA9 (176-190)^AQ96318 (176-190)	A0A1P8B543_ARATH Cruciferin 3 OS=Arabidopsis thaliana OX=3702 GN=CRU3 PE=1	160	QPWEGQGQQGQQGFR	NH2-QPWEGQGQQGQQGFR-COOH	15	62	43	NH2			160_QPWEGQGQQGQQGFR
A8MRW1	B9DFR9 (1-9)^AF4JHB6 (1-9)^AP61837 (1-9)^AQ06611 (1-9)^AQ08733 (1-9)^AQ39196 (1-9)	A8MRW1_ARATH Plasma membrane intrinsic protein 1B OS=Arabidopsis thaliana OX=3702 GN=PIP1B PE=3	1	MEGKEEDVR	Ace-M<Mox*>EGK<But4C13>EEDVR-COOH	9	65	44	Ace		Ace	1_MEGKEEDVR
F4I9U2	F4I9U3 (2-17)^AQ84WS6 (2-17)	F4I9U2_ARATH Nucleolin OS=Arabidopsis thaliana OX=3702 GN=At1g65090 PE=4	2	SQTMEEYQSNESEDKR	Ace-SQTM<Mox*>EEYQSNESEDK<But4C13>R-COOH	16	92	38	Ace		Ace	2_SQTMEEYQSNESEDKR
P06525		ADH1_ARATH Alcohol dehydrogenase class-P OS=Arabidopsis thaliana OX=3702 GN=ADH1 PE=1	2	STTGQIIR	Ace-STTGQIIR-COOH	8	63	46	Ace		Ace	2_STTGQIIR
P15460		2SS4_ARATH 2S seed storage protein 4 OS=Arabidopsis thaliana OX=3702 GN=AT2S4 PE=2	46	QKEFQQDQHLR	NH2-QK<But4C13>EFQQDQHLR-COOH	11	61	45	NH2			46_QKEFQQDQHLR
P15456		CRU2_ARATH 12S seed storage protein CRB OS=Arabidopsis thaliana OX=3702 GN=CRB PE=1	223	INVETAQQLQNQQDNR	NH2-INVETAQQLQNQQDNR-COOH	16	124	45	NH2			223_INVETAQQLQNQQDNR
P15458	P15459 (117-130)	2SS2_ARATH 2S seed storage protein 2 OS=Arabidopsis thaliana OX=3702 GN=AT2S2 PE=2	124	AVSLQGQHGPFQSR	NH2-AVSLQGQHGPFQSR-COOH	14	71	45	NH2			124_AVSLQGQHGPFQSR
F4JLA9	Q96318 (142-170)	F4JLA9_ARATH Cruciferin 3 OS=Arabidopsis thaliana OX=3702 GN=CRU3 PE=1	142	PWEGQGQQGQQGRQGQPWEGQGQQGQQGR	NH2-PWEGQGQQGQQGRQGQPWEGQGQQGQQGR-COOH	29	46	40	NH2			142_PWEGQGQQGQQGRQGQPWEGQGQQGQQGR
A0A1P8B543	F4JLA9 (136-154)^AQ96318 (136-154)	A0A1P8B543_ARATH Cruciferin 3 OS=Arabidopsis thaliana OX=3702 GN=CRU3 PE=1	136	QGQQGQPWEGQGQQGQQGR	NH2-Q<Pyr>GQQGQPWEGQGQQGQQGR-COOH	19	93	40	NH2	Q<Pyr>		136_QGQQGQPWEGQGQQGQQGR
P15458	P15459 (117-130)	2SS2_ARATH 2S seed storage protein 2 OS=Arabidopsis thaliana OX=3702 GN=AT2S2 PE=2	124	AVSLQGQHGPFQSR	NH2-AVSLQGQHGPFQSR-COOH	14	107	45	NH2			124_AVSLQGQHGPFQSR
P15455	F4K8S2 (172-185)	CRU1_ARATH 12S seed storage protein CRA1 OS=Arabidopsis thaliana OX=3702 GN=CRA1 PE=1	359	GEAQIQIVNDNGNR	NH2-GEAQIQIVNDNGNR-COOH	14	78	45	NH2			359_GEAQIQIVNDNGNR
F4JLA9	Q96318 (459-471)	F4JLA9_ARATH Cruciferin 3 OS=Arabidopsis thaliana OX=3702 GN=CRU3 PE=1	388	TNENAMISTLAGR	NH2-TNENAM<Mox*>ISTLAGR-COOH	13	64	45	NH2			388_TNENAMISTLAGR
A0A1P8B543	F4JLA9 (136-154)^AQ96318 (136-154)	A0A1P8B543_ARATH Cruciferin 3 OS=Arabidopsis thaliana OX=3702 GN=CRU3 PE=1	136	QGQQGQPWEGQGQQGQQGR	NH2-Q<Pyr>GQQGQPWEGQGQQGQQGR-COOH	19	84	40	NH2	Q<Pyr>		136_QGQQGQPWEGQGQQGQQGR
Q9LJ98		PFD2_ARATH Probable prefoldin subunit 2 OS=Arabidopsis thaliana OX=3702 GN=At3g22480 PE=2	2	ASKSGSGGLR	Ace-ASK<But4C13>SGSGGLR-COOH	10	60	46	Ace		Ace	2_ASKSGSGGLR
F4I9U2	F4I9U3 (2-17)^AQ84WS6 (2-17)	F4I9U2_ARATH Nucleolin OS=Arabidopsis thaliana OX=3702 GN=At1g65090 PE=4	2	SQTMEEYQSNESEDKR	Ace-SQTM<Mox*>EEYQSNESEDK<But4C13>R-COOH	16	72	37	Ace		Ace	2_SQTMEEYQSNESEDKR
Q8GWR2	Q9ZVY7 (78-88)	OBP1B_ARATH Oil body-associated protein 1B OS=Arabidopsis thaliana OX=3702 GN=OBAP1B PE=1	78	LIYDGPDANAR	NH2-LIYDGPDANAR-COOH	11	81	45	NH2			78_LIYDGPDANAR
P15456		CRU2_ARATH 12S seed storage protein CRB OS=Arabidopsis thaliana OX=3702 GN=CRB PE=1	40	PSQIIKSEGGR	NH2-PSQIIK<But>SEGGR-COOH	11	63	44	NH2			40_PSQIIKSEGGR
P15456		CRU2_ARATH 12S seed storage protein CRB OS=Arabidopsis thaliana OX=3702 GN=CRB PE=1	40	PSQIIKSEGGR	NH2-PSQIIK<But4C13>SEGGR-COOH	11	69	44	NH2			40_PSQIIKSEGGR
Q9LW12		LEA29_ARATH Late embryogenesis abundant protein 29 OS=Arabidopsis thaliana OX=3702 GN=LEA29 PE=2	2	ASNQQSYKAGETR	Ace-ASNQQSYK<But4C13>AGETR-COOH	13	71	45	Ace		Ace	2_ASNQQSYKAGETR
A0A1P8B4X2	F4JIE0 (190-200)^AF4JIE1 (191-201)^AQ8W108 (189-199)	A0A1P8B4X2_ARATH 1,2-dihydroxy-3-keto-5-methylthiopentene dioxygenase OS=Arabidopsis thaliana OX=3702 GN=ATARD2 PE=3	172	VNEGGVIDASA	NH2-VNEGGVIDASA-COOH	11	55	44	NH2			172_VNEGGVIDASA
P15456		CRU2_ARATH 12S seed storage protein CRB OS=Arabidopsis thaliana OX=3702 GN=CRB PE=1	191	PQGQEWLQGR	NH2-PQGQEWLQGR-COOH	10	49	45	NH2			191_PQGQEWLQGR
Q9SIN3		Q9SIN3_ARATH Late embryogenesis abundant domain-containing protein / LEA domain-containing protein OS=Arabidopsis thaliana OX=3702 GN=At2g42560 PE=4	251	SATSEKAQR	But-SATSEK<But>AQR-COOH	9	59	46	But			251_SATSEKAQR	But
Q9SIN3		Q9SIN3_ARATH Late embryogenesis abundant domain-containing protein / LEA domain-containing protein OS=Arabidopsis thaliana OX=3702 GN=At2g42560 PE=4	252	ATSEKAQR	But4C13-ATSEK<But4C13>AQR-COOH	8	49	45	But4C13			252_ATSEKAQR	But
Q9SIN3		Q9SIN3_ARATH Late embryogenesis abundant domain-containing protein / LEA domain-containing protein OS=Arabidopsis thaliana OX=3702 GN=At2g42560 PE=4	252	ATSEKAQR	But-ATSEK<But>AQR-COOH	8	72	45	But			252_ATSEKAQR	But
Q9ZWA9		CRU4_ARATH 12S seed storage protein CRD OS=Arabidopsis thaliana OX=3702 GN=CRD PE=1	436	FSQQETMLSMTPSSSS	NH2-FSQQETM<Mox*>LSM<Mox*>TPSSSS-COOH	16	42	37	NH2			436_FSQQETMLSMTPSSSS
Q9LW12		LEA29_ARATH Late embryogenesis abundant protein 29 OS=Arabidopsis thaliana OX=3702 GN=LEA29 PE=2	2	ASNQQSYKAGETR	Ace-ASNQQSYK<But4C13>AGETR-COOH	13	51	44	Ace		Ace	2_ASNQQSYKAGETR
P15456		CRU2_ARATH 12S seed storage protein CRB OS=Arabidopsis thaliana OX=3702 GN=CRB PE=1	395	TNENAQVNTLAGR	NH2-TNENAQVNTLAGR-COOH	13	70	45	NH2			395_TNENAQVNTLAGR
P15455	F4K8S2 (106-115)	CRU1_ARATH 12S seed storage protein CRA1 OS=Arabidopsis thaliana OX=3702 GN=CRA1 PE=1	293	CTDNLDDPSR	NH2-C<Cmm*>TDNLDDPSR-COOH	10	56	38	NH2			293_CTDNLDDPSR
A0A1P8B543	F4JLA9 (141-154)^AQ96318 (141-154)	A0A1P8B543_ARATH Cruciferin 3 OS=Arabidopsis thaliana OX=3702 GN=CRU3 PE=1	141	QPWEGQGQQGQQGR	NH2-Q<Pyr>PWEGQGQQGQQGR-COOH	14	85	42	NH2	Q<Pyr>		141_QPWEGQGQQGQQGR
A0A1P8B7I6	F4JQF1 (286-301)	A0A1P8B7I6_ARATH Late embryogenesis abundant (LEA) protein OS=Arabidopsis thaliana OX=3702 GN=AP22.17 PE=4	292	DKANDAYESGSEAAGR	NH2-DK<But4C13>ANDAYESGSEAAGR-COOH	16	91	42	NH2			292_DKANDAYESGSEAAGR
Q93YR3		F10AL_ARATH FAM10 family protein At4g22670 OS=Arabidopsis thaliana OX=3702 GN=At4g22670 PE=1	104	PPQKMGDSSVEVTDENR	NH2-PPQK<But4C13>M<Mox*>GDSSVEVTDENR-COOH	17	66	44	NH2			104_PPQKMGDSSVEVTDENR
Q9SIN3		Q9SIN3_ARATH Late embryogenesis abundant domain-containing protein / LEA domain-containing protein OS=Arabidopsis thaliana OX=3702 GN=At2g42560 PE=4	304	ASEYMKETGSTAAEQAAR	NH2-ASEYM<Mox*>K<But4C13>ETGSTAAEQAAR-COOH	18	50	43	NH2			304_ASEYMKETGSTAAEQAAR
Q5XEP2		HSOP2_ARATH Hsp70-Hsp90 organizing protein 2 OS=Arabidopsis thaliana OX=3702 GN=HOP2 PE=1	193	TQQAGDDMEIGEEEMAVPSR	NH2-TQQAGDDM<Mox*>EIGEEEM<Mox*>AVPSR-COOH	20	54	36	NH2			193_TQQAGDDMEIGEEEMAVPSR
A0A2H1ZEH9	Q8H0X6 (43-57)	A0A2H1ZEH9_ARATH Cysteine proteinase inhibitor OS=Arabidopsis thaliana OX=3702 GN=CYSB PE=1	10	VPANQNSGEVESLAR	NH2-VPANQNSGEVESLAR-COOH	15	48	45	NH2			10_VPANQNSGEVESLAR
Q5XEP2		HSOP2_ARATH Hsp70-Hsp90 organizing protein 2 OS=Arabidopsis thaliana OX=3702 GN=HOP2 PE=1	193	TQQAGDDMEIGEEEMAVPSR	NH2-TQQAGDDM<Mox*>EIGEEEM<Mox*>AVPSR-COOH	20	64	37	NH2			193_TQQAGDDMEIGEEEMAVPSR
A0A2H1ZEH9	Q8H0X6 (43-57)	A0A2H1ZEH9_ARATH Cysteine proteinase inhibitor OS=Arabidopsis thaliana OX=3702 GN=CYSB PE=1	10	VPANQNSGEVESLAR	NH2-VPANQNSGEVESLAR-COOH	15	58	45	NH2			10_VPANQNSGEVESLAR
Q5XEP2		HSOP2_ARATH Hsp70-Hsp90 organizing protein 2 OS=Arabidopsis thaliana OX=3702 GN=HOP2 PE=1	193	TQQAGDDMEIGEEEMAVPSR	NH2-TQQAGDDM<Mox*>EIGEEEM<Mox*>AVPSR-COOH	20	59	37	NH2			193_TQQAGDDMEIGEEEMAVPSR
Q9SIN3		Q9SIN3_ARATH Late embryogenesis abundant domain-containing protein / LEA domain-containing protein OS=Arabidopsis thaliana OX=3702 GN=At2g42560 PE=4	250	GSATSEKAQR	But-GSATSEK<But>AQR-COOH	10	54	45	But			250_GSATSEKAQR	But
F4JEL4	F4JEL5 (2-14)^AP41376 (2-14)	F4JEL4_ARATH Eukaryotic translation initiation factor 4A1 OS=Arabidopsis thaliana OX=3702 GN=EIF4A1 PE=1	2	AGSAPEGTQFDAR	Ace-AGSAPEGTQFDAR-COOH	13	87	43	Ace		Ace	2_AGSAPEGTQFDAR
O49347		PSBY_ARATH Photosystem II core complex proteins psbY, chloroplastic OS=Arabidopsis thaliana OX=3702 GN=PSBY PE=2	144	AAEAAAASSDSR	But4C13-AAEAAAASSDSR-COOH	12	52	43	But4C13			144_AAEAAAASSDSR	But
O49347		PSBY_ARATH Photosystem II core complex proteins psbY, chloroplastic OS=Arabidopsis thaliana OX=3702 GN=PSBY PE=2	144	AAEAAAASSDSR	But-AAEAAAASSDSR-COOH	12	75	42	But			144_AAEAAAASSDSR	But
Q5XEP2		HSOP2_ARATH Hsp70-Hsp90 organizing protein 2 OS=Arabidopsis thaliana OX=3702 GN=HOP2 PE=1	193	TQQAGDDMEIGEEEMAVPSR	NH2-TQQAGDDM<Mox*>EIGEEEM<Mox*>AVPSR-COOH	20	65	38	NH2			193_TQQAGDDMEIGEEEMAVPSR
Q5XEP2		HSOP2_ARATH Hsp70-Hsp90 organizing protein 2 OS=Arabidopsis thaliana OX=3702 GN=HOP2 PE=1	193	TQQAGDDMEIGEEEMAVPSR	NH2-TQQAGDDM<Mox*>EIGEEEM<Mox*>AVPSR-COOH	20	46	37	NH2			193_TQQAGDDMEIGEEEMAVPSR
A0A1P8B543	F4JLA9 (141-154)^AQ96318 (141-154)	A0A1P8B543_ARATH Cruciferin 3 OS=Arabidopsis thaliana OX=3702 GN=CRU3 PE=1	141	QPWEGQGQQGQQGR	NH2-Q<Pyr>PWEGQGQQGQQGR-COOH	14	97	42	NH2	Q<Pyr>		141_QPWEGQGQQGQQGR
A0A1P8B543	F4JLA9 (172-190)^AQ96318 (172-190)	A0A1P8B543_ARATH Cruciferin 3 OS=Arabidopsis thaliana OX=3702 GN=CRU3 PE=1	156	GQQGQPWEGQGQQGQQGFR	NH2-GQQGQPWEGQGQQGQQGFR-COOH	19	81	43	NH2			156_GQQGQPWEGQGQQGQQGFR
P15455		CRU1_ARATH 12S seed storage protein CRA1 OS=Arabidopsis thaliana OX=3702 GN=CRA1 PE=1	115	TFQDSSEFQPR	NH2-TFQDSSEFQPR-COOH	11	61	43	NH2			115_TFQDSSEFQPR
Q9SIN3		Q9SIN3_ARATH Late embryogenesis abundant domain-containing protein / LEA domain-containing protein OS=Arabidopsis thaliana OX=3702 GN=At2g42560 PE=4	304	ASEYMKETGSTAAEQAAR	NH2-ASEYM<Mox*>K<But4C13>ETGSTAAEQAAR-COOH	18	84	43	NH2			304_ASEYMKETGSTAAEQAAR
A0A1P8B543	F4JLA9 (175-190)^AQ96318 (175-190)	A0A1P8B543_ARATH Cruciferin 3 OS=Arabidopsis thaliana OX=3702 GN=CRU3 PE=1	159	GQPWEGQGQQGQQGFR	NH2-GQPWEGQGQQGQQGFR-COOH	16	88	42	NH2			159_GQPWEGQGQQGQQGFR
Q9ZWA9		CRU4_ARATH 12S seed storage protein CRD OS=Arabidopsis thaliana OX=3702 GN=CRD PE=1	436	FSQQETMLSMTPSSSS	NH2-FSQQETM<Mox*>LSM<Mox*>TPSSSS-COOH	16	42	37	NH2			436_FSQQETMLSMTPSSSS
P15455	F4K8S2 (96-105)	CRU1_ARATH 12S seed storage protein CRA1 OS=Arabidopsis thaliana OX=3702 GN=CRA1 PE=1	283	GLEETICSAR	NH2-GLEETIC<Cmm*>SAR-COOH	10	56	45	NH2			283_GLEETICSAR
Q9SIN3		Q9SIN3_ARATH Late embryogenesis abundant domain-containing protein / LEA domain-containing protein OS=Arabidopsis thaliana OX=3702 GN=At2g42560 PE=4	304	ASEYMKETGSTAAEQAAR	NH2-ASEYM<Mox*>K<But4C13>ETGSTAAEQAAR-COOH	18	109	43	NH2			304_ASEYMKETGSTAAEQAAR
Q7Y175		PUX5_ARATH Plant UBX domain-containing protein 5 OS=Arabidopsis thaliana OX=3702 GN=PUX5 PE=1	310	TLGASGSGSSSAPQASSAPMNVAPAPSR	NH2-TLGASGSGSSSAPQASSAPM<Mox*>NVAPAPSR-COOH	28	56	43	NH2			310_TLGASGSGSSSAPQASSAPMNVAPAPSR
Q9SIN3		Q9SIN3_ARATH Late embryogenesis abundant domain-containing protein / LEA domain-containing protein OS=Arabidopsis thaliana OX=3702 GN=At2g42560 PE=4	250	GSATSEKAQR	But4C13-GSATSEK<But4C13>AQR-COOH	10	90	45	But4C13			250_GSATSEKAQR	But
Q7Y175		PUX5_ARATH Plant UBX domain-containing protein 5 OS=Arabidopsis thaliana OX=3702 GN=PUX5 PE=1	310	TLGASGSGSSSAPQASSAPMNVAPAPSR	NH2-TLGASGSGSSSAPQASSAPM<Mox*>NVAPAPSR-COOH	28	45	43	NH2			310_TLGASGSGSSSAPQASSAPMNVAPAPSR
Q9SIN3		Q9SIN3_ARATH Late embryogenesis abundant domain-containing protein / LEA domain-containing protein OS=Arabidopsis thaliana OX=3702 GN=At2g42560 PE=4	250	GSATSEKAQR	But-GSATSEK<But>AQR-COOH	10	61	45	But			250_GSATSEKAQR	But
F4JBP8	Q9M330 (2-12)	F4JBP8_ARATH Proteasome inhibitor-like protein OS=Arabidopsis thaliana OX=3702 GN=At3g53970 PE=1	2	ANSQTVMAMIR	Ace-ANSQTVM<Mox*>AM<Mox*>IR-COOH	11	56	44	Ace		Ace	2_ANSQTVMAMIR
Q9FE78		IF2A_ARATH Eukaryotic translation initiation factor 2 subunit alpha OS=Arabidopsis thaliana OX=3702 GN=EIF2A PE=1	2	ANPAPNLECR	Ace-ANPAPNLEC<Cmm*>R-COOH	10	56	44	Ace		Ace	2_ANPAPNLECR
A0A1P8B543	F4JLA9 (172-190)^AQ96318 (172-190)	A0A1P8B543_ARATH Cruciferin 3 OS=Arabidopsis thaliana OX=3702 GN=CRU3 PE=1	156	GQQGQPWEGQGQQGQQGFR	NH2-GQQGQPWEGQGQQGQQGFR-COOH	19	146	42	NH2			156_GQQGQPWEGQGQQGQQGFR
Q9SIN3		Q9SIN3_ARATH Late embryogenesis abundant domain-containing protein / LEA domain-containing protein OS=Arabidopsis thaliana OX=3702 GN=At2g42560 PE=4	304	ASEYMKETGSTAAEQAAR	NH2-ASEYM<Mox*>K<But>ETGSTAAEQAAR-COOH	18	56	43	NH2			304_ASEYMKETGSTAAEQAAR
Q9SIN3		Q9SIN3_ARATH Late embryogenesis abundant domain-containing protein / LEA domain-containing protein OS=Arabidopsis thaliana OX=3702 GN=At2g42560 PE=4	304	ASEYMKETGSTAAEQAAR	NH2-ASEYM<Mox*>K<But4C13>ETGSTAAEQAAR-COOH	18	76	42	NH2			304_ASEYMKETGSTAAEQAAR
A0A1P8B543	F4JLA9 (172-190)^AQ96318 (172-190)	A0A1P8B543_ARATH Cruciferin 3 OS=Arabidopsis thaliana OX=3702 GN=CRU3 PE=1	156	GQQGQPWEGQGQQGQQGFR	NH2-GQQGQPWEGQGQQGQQGFR-COOH	19	116	42	NH2			156_GQQGQPWEGQGQQGQQGFR
A0A1P8B543	F4JLA9 (173-190)^AQ96318 (173-190)	A0A1P8B543_ARATH Cruciferin 3 OS=Arabidopsis thaliana OX=3702 GN=CRU3 PE=1	157	QQGQPWEGQGQQGQQGFR	But4C13-QQGQPWEGQGQQGQQGFR-COOH	18	74	42	But4C13			157_QQGQPWEGQGQQGQQGFR	But
A0A1P8B543	F4JLA9 (171-190)^AQ96318 (171-190)	A0A1P8B543_ARATH Cruciferin 3 OS=Arabidopsis thaliana OX=3702 GN=CRU3 PE=1	155	QGQQGQPWEGQGQQGQQGFR	NH2-QGQQGQPWEGQGQQGQQGFR-COOH	20	80	42	NH2			155_QGQQGQPWEGQGQQGQQGFR
O22831		O22831_ARATH At2g43720/F18O19.17 OS=Arabidopsis thaliana OX=3702 GN=At2g43720 PE=1	1	MDQTAEEKMVR	Ace-M<Mox*>DQTAEEK<But4C13>M<Mox*>VR-COOH	11	48	42	Ace		Ace	1_MDQTAEEKMVR
Q9C826		ABA2_ARATH Xanthoxin dehydrogenase OS=Arabidopsis thaliana OX=3702 GN=ABA2 PE=1	2	STNTESSSYSSLPSQR	Ace-STNTESSSYSSLPSQR-COOH	16	104	41	Ace		Ace	2_STNTESSSYSSLPSQR
F4JBP8	Q9M330 (2-12)	F4JBP8_ARATH Proteasome inhibitor-like protein OS=Arabidopsis thaliana OX=3702 GN=At3g53970 PE=1	2	ANSQTVMAMIR	Ace-ANSQTVM<Mox*>AM<Mox*>IR-COOH	11	60	44	Ace		Ace	2_ANSQTVMAMIR
F4JEL4	F4JEL5 (2-14)^AP41376 (2-14)	F4JEL4_ARATH Eukaryotic translation initiation factor 4A1 OS=Arabidopsis thaliana OX=3702 GN=EIF4A1 PE=1	2	AGSAPEGTQFDAR	Ace-AGSAPEGTQFDAR-COOH	13	86	42	Ace		Ace	2_AGSAPEGTQFDAR
A0A1P8B543	F4JLA9 (172-190)^AQ96318 (172-190)	A0A1P8B543_ARATH Cruciferin 3 OS=Arabidopsis thaliana OX=3702 GN=CRU3 PE=1	156	GQQGQPWEGQGQQGQQGFR	NH2-GQQGQPWEGQGQQGQQGFR-COOH	19	144	42	NH2			156_GQQGQPWEGQGQQGQQGFR
F4HV96	P41377 (2-14)	F4HV96_ARATH Eif4a-2 OS=Arabidopsis thaliana OX=3702 GN=EIF4A-2 PE=1	2	AGSAPEGTQFDTR	Ace-AGSAPEGTQFDTR-COOH	13	68	42	Ace		Ace	2_AGSAPEGTQFDTR
A0A1P8B543	F4JLA9 (172-190)^AQ96318 (172-190)	A0A1P8B543_ARATH Cruciferin 3 OS=Arabidopsis thaliana OX=3702 GN=CRU3 PE=1	156	GQQGQPWEGQGQQGQQGFR	NH2-GQQGQPWEGQGQQGQQGFR-COOH	19	93	42	NH2			156_GQQGQPWEGQGQQGQQGFR
P15455		CRU1_ARATH 12S seed storage protein CRA1 OS=Arabidopsis thaliana OX=3702 GN=CRA1 PE=1	126	FEGQGQSQR	But-FEGQGQSQR-COOH	9	58	43	But			126_FEGQGQSQR	But
Q39044		VPEB_ARATH Vacuolar-processing enzyme beta-isozyme OS=Arabidopsis thaliana OX=3702 GN=bVPE PE=2	40	PADQDEDGVGTR	But-PADQDEDGVGTR-COOH	12	56	40	But			40_PADQDEDGVGTR	But
A0A1P8B543	F4JLA9 (173-190)^AQ96318 (173-190)	A0A1P8B543_ARATH Cruciferin 3 OS=Arabidopsis thaliana OX=3702 GN=CRU3 PE=1	157	QQGQPWEGQGQQGQQGFR	But4C13-QQGQPWEGQGQQGQQGFR-COOH	18	89	42	But4C13			157_QQGQPWEGQGQQGQQGFR	But
A0A1P8B543	F4JLA9 (124-135)^AQ96318 (124-135)	A0A1P8B543_ARATH Cruciferin 3 OS=Arabidopsis thaliana OX=3702 GN=CRU3 PE=1	124	QGQQQGQPWQGR	But-QGQQQGQPWQGR-COOH	12	54	44	But			124_QGQQQGQPWQGR	But
P15455		CRU1_ARATH 12S seed storage protein CRA1 OS=Arabidopsis thaliana OX=3702 GN=CRA1 PE=1	126	FEGQGQSQR	But4C13-FEGQGQSQR-COOH	9	47	44	But4C13			126_FEGQGQSQR	But
Q9SK09		VCL22_ARATH Vicilin-like seed storage protein At2g28490 OS=Arabidopsis thaliana OX=3702 GN=At2g28490 PE=2	67	GGGEWGGGGEGGGGGR	But-GGGEWGGGGEGGGGGR-COOH	16	39	37	But			67_GGGEWGGGGEGGGGGR	But
Q9FH31		2SS5_ARATH 2S seed storage protein 5 OS=Arabidopsis thaliana OX=3702 GN=SESA5 PE=1	38	PQQGKCQR	But-PQQGK<But>C<Cmm*>QR-COOH	8	46	44	But			38_PQQGKCQR	But
A0A1P8B543	F4JLA9 (171-190)^AQ96318 (171-190)	A0A1P8B543_ARATH Cruciferin 3 OS=Arabidopsis thaliana OX=3702 GN=CRU3 PE=1	155	QGQQGQPWEGQGQQGQQGFR	NH2-QGQQGQPWEGQGQQGQQGFR-COOH	20	52	42	NH2			155_QGQQGQPWEGQGQQGQQGFR
A0A1P8B543	F4JLA9 (171-190)^AQ96318 (171-190)	A0A1P8B543_ARATH Cruciferin 3 OS=Arabidopsis thaliana OX=3702 GN=CRU3 PE=1	155	QGQQGQPWEGQGQQGQQGFR	But-QGQQGQPWEGQGQQGQQGFR-COOH	20	43	41	But			155_QGQQGQPWEGQGQQGQQGFR	But
P15456		CRU2_ARATH 12S seed storage protein CRB OS=Arabidopsis thaliana OX=3702 GN=CRB PE=1	223	INVETAQQLQNQQDNR	NH2-INVETAQQLQNQQDNR-COOH	16	120	45	NH2			223_INVETAQQLQNQQDNR
F4JBP8	Q9M330 (2-12)	F4JBP8_ARATH Proteasome inhibitor-like protein OS=Arabidopsis thaliana OX=3702 GN=At3g53970 PE=1	2	ANSQTVMAMIR	Ace-ANSQTVM<Mox*>AM<Mox*>IR-COOH	11	53	44	Ace		Ace	2_ANSQTVMAMIR
F4JEL4	F4JEL5 (2-14)^AP41376 (2-14)	F4JEL4_ARATH Eukaryotic translation initiation factor 4A1 OS=Arabidopsis thaliana OX=3702 GN=EIF4A1 PE=1	2	AGSAPEGTQFDAR	Ace-AGSAPEGTQFDAR-COOH	13	78	43	Ace		Ace	2_AGSAPEGTQFDAR
Q949W6		KAKU4_ARATH Protein KAKU4 OS=Arabidopsis thaliana OX=3702 GN=KAKU4 PE=1	1	MDSVSGYAAGAGQPR	Ace-M<Mox*>DSVSGYAAGAGQPR-COOH	15	91	41	Ace		Ace	1_MDSVSGYAAGAGQPR
A0A1P8B543	F4JLA9 (172-190)^AQ96318 (172-190)	A0A1P8B543_ARATH Cruciferin 3 OS=Arabidopsis thaliana OX=3702 GN=CRU3 PE=1	156	GQQGQPWEGQGQQGQQGFR	NH2-GQQGQPWEGQGQQGQQGFR-COOH	19	130	42	NH2			156_GQQGQPWEGQGQQGQQGFR
A0A1P8B543	F4JLA9 (171-190)^AQ96318 (171-190)	A0A1P8B543_ARATH Cruciferin 3 OS=Arabidopsis thaliana OX=3702 GN=CRU3 PE=1	155	QGQQGQPWEGQGQQGQQGFR	NH2-QGQQGQPWEGQGQQGQQGFR-COOH	20	105	41	NH2			155_QGQQGQPWEGQGQQGQQGFR
F4J109	F4J110 (552-560)^AQ8L611 (562-570)	F4J109_ARATH Transducin family protein / WD-40 repeat family protein OS=Arabidopsis thaliana OX=3702 GN=SEC31B PE=1	560	PVFDNAIQR	NH2-PVFDNAIQR-COOH	9	49	46	NH2			560_PVFDNAIQR
Q8L9R4		Q8L9R4_ARATH At5g27990 OS=Arabidopsis thaliana OX=3702 GN=At5g27990 PE=2	1	MNQNATLTVEAR	Ace-M<Mox*>NQNATLTVEAR-COOH	12	93	45	Ace		Ace	1_MNQNATLTVEAR
A0A1P8B543	F4JLA9 (171-190)^AQ96318 (171-190)	A0A1P8B543_ARATH Cruciferin 3 OS=Arabidopsis thaliana OX=3702 GN=CRU3 PE=1	155	QGQQGQPWEGQGQQGQQGFR	NH2-QGQQGQPWEGQGQQGQQGFR-COOH	20	49	42	NH2			155_QGQQGQPWEGQGQQGQQGFR
Q9FZK5		Q9FZK5_ARATH F17L21.9 OS=Arabidopsis thaliana OX=3702 GN=At1g27300 PE=1	1	MESSEDVENLSR	Ace-M<Mox*>ESSEDVENLSR-COOH	12	82	39	Ace		Ace	1_MESSEDVENLSR
A0A1P8B543	F4JLA9 (172-190)^AQ96318 (172-190)	A0A1P8B543_ARATH Cruciferin 3 OS=Arabidopsis thaliana OX=3702 GN=CRU3 PE=1	156	GQQGQPWEGQGQQGQQGFR	NH2-GQQGQPWEGQGQQGQQGFR-COOH	19	71	42	NH2			156_GQQGQPWEGQGQQGQQGFR
P15455		CRU1_ARATH 12S seed storage protein CRA1 OS=Arabidopsis thaliana OX=3702 GN=CRA1 PE=1	126	FEGQGQSQR	But-FEGQGQSQR-COOH	9	54	43	But			126_FEGQGQSQR	But
A0A1P8B7I6	F4JQF1 (333-347)	A0A1P8B7I6_ARATH Late embryogenesis abundant (LEA) protein OS=Arabidopsis thaliana OX=3702 GN=AP22.17 PE=4	339	EKASDAAGEYGSYMR	NH2-EK<But4C13>ASDAAGEYGSYM<Mox*>R-COOH	15	42	41	NH2			339_EKASDAAGEYGSYMR
Q9SK09		VCL22_ARATH Vicilin-like seed storage protein At2g28490 OS=Arabidopsis thaliana OX=3702 GN=At2g28490 PE=2	65	GEGGGEWGGGGEGGGGGR	But-GEGGGEWGGGGEGGGGGR-COOH	18	53	35	But			65_GEGGGEWGGGGEGGGGGR	But
Q9SYL9		RK13_ARATH 50S ribosomal protein L13, chloroplastic OS=Arabidopsis thaliana OX=3702 GN=RPL13 PE=2	58	EAEPTTTTSLVPANQR	NH2-EAEPTTTTSLVPANQR-COOH	16	58	45	NH2			58_EAEPTTTTSLVPANQR
A0A1P8B543	F4JLA9 (126-135)^AQ96318 (126-135)	A0A1P8B543_ARATH Cruciferin 3 OS=Arabidopsis thaliana OX=3702 GN=CRU3 PE=1	126	QQQGQPWQGR	But-QQQGQPWQGR-COOH	10	52	44	But			126_QQQGQPWQGR	But
P15456		CRU2_ARATH 12S seed storage protein CRB OS=Arabidopsis thaliana OX=3702 GN=CRB PE=1	114	PVFGEGQGQGQSQGFR	NH2-PVFGEGQGQGQSQGFR-COOH	16	98	44	NH2			114_PVFGEGQGQGQSQGFR
P15455	F4K8S2 (11-20)	CRU1_ARATH 12S seed storage protein CRA1 OS=Arabidopsis thaliana OX=3702 GN=CRA1 PE=1	198	PQGQVWLQGR	NH2-PQGQVWLQGR-COOH	10	66	45	NH2			198_PQGQVWLQGR
Q949W6		KAKU4_ARATH Protein KAKU4 OS=Arabidopsis thaliana OX=3702 GN=KAKU4 PE=1	1	MDSVSGYAAGAGQPR	Ace-M<Mox*>DSVSGYAAGAGQPR-COOH	15	110	42	Ace		Ace	1_MDSVSGYAAGAGQPR
A0A1P8B543	F4JLA9 (125-135)^AQ96318 (125-135)	A0A1P8B543_ARATH Cruciferin 3 OS=Arabidopsis thaliana OX=3702 GN=CRU3 PE=1	125	GQQQGQPWQGR	But-GQQQGQPWQGR-COOH	11	69	44	But			125_GQQQGQPWQGR	But
Q9LF88		Y3304_ARATH Late embryogenesis abundant protein At3g53040 OS=Arabidopsis thaliana OX=3702 GN=At3g53040 PE=2	403	SKLTGATTPSDEETR	NH2-SK<But4C13>LTGATTPSDEETR-COOH	15	73	45	NH2			403_SKLTGATTPSDEETR
A0A2H1ZEH9	Q8H0X6 (42-57)	A0A2H1ZEH9_ARATH Cysteine proteinase inhibitor OS=Arabidopsis thaliana OX=3702 GN=CYSB PE=1	9	DVPANQNSGEVESLAR	NH2-DVPANQNSGEVESLAR-COOH	16	100	44	NH2			9_DVPANQNSGEVESLAR
A0A1P8B543	F4JLA9 (123-135)^AQ96318 (123-135)	A0A1P8B543_ARATH Cruciferin 3 OS=Arabidopsis thaliana OX=3702 GN=CRU3 PE=1	123	MQGQQQGQPWQGR	But-M<Mox*>QGQQQGQPWQGR-COOH	13	70	43	But			123_MQGQQQGQPWQGR	But
A0A2H1ZEH9	Q8H0X6 (47-57)	A0A2H1ZEH9_ARATH Cysteine proteinase inhibitor OS=Arabidopsis thaliana OX=3702 GN=CYSB PE=1	14	QNSGEVESLAR	NH2-Q<Pyr>NSGEVESLAR-COOH	11	59	44	NH2	Q<Pyr>		14_QNSGEVESLAR
Q9SIN3		Q9SIN3_ARATH Late embryogenesis abundant domain-containing protein / LEA domain-containing protein OS=Arabidopsis thaliana OX=3702 GN=At2g42560 PE=4	496	QPGFVSGAR	NH2-Q<Pyr>PGFVSGAR-COOH	9	54	44	NH2	Q<Pyr>		496_QPGFVSGAR
Q9SIN3		Q9SIN3_ARATH Late embryogenesis abundant domain-containing protein / LEA domain-containing protein OS=Arabidopsis thaliana OX=3702 GN=At2g42560 PE=4	62	GSNMPVSDEGEGETKMKR	NH2-GSNM<Mox*>PVSDEGEGETK<But4C13>M<Mox*>K<But4C13>R-COOH	18	62	43	NH2			62_GSNMPVSDEGEGETKMKR
A0A1P8B543	F4JLA9 (138-154)^AQ96318 (138-154)	A0A1P8B543_ARATH Cruciferin 3 OS=Arabidopsis thaliana OX=3702 GN=CRU3 PE=1	138	QQGQPWEGQGQQGQQGR	But-QQGQPWEGQGQQGQQGR-COOH	17	79	42	But			138_QQGQPWEGQGQQGQQGR	But
A0A1P8B543	F4JLA9 (138-154)^AQ96318 (138-154)	A0A1P8B543_ARATH Cruciferin 3 OS=Arabidopsis thaliana OX=3702 GN=CRU3 PE=1	138	QQGQPWEGQGQQGQQGR	But4C13-QQGQPWEGQGQQGQQGR-COOH	17	44	43	But4C13			138_QQGQPWEGQGQQGQQGR	But
P15455		CRU1_ARATH 12S seed storage protein CRA1 OS=Arabidopsis thaliana OX=3702 GN=CRA1 PE=1	114	ETFQDSSEFQPR	NH2-ETFQDSSEFQPR-COOH	12	72	42	NH2			114_ETFQDSSEFQPR
Q9SIN3		Q9SIN3_ARATH Late embryogenesis abundant domain-containing protein / LEA domain-containing protein OS=Arabidopsis thaliana OX=3702 GN=At2g42560 PE=4	496	QPGFVSGAR	NH2-QPGFVSGAR-COOH	9	46	46	NH2			496_QPGFVSGAR
Q9S7S3		M17_ARATH Late embryogenesis abundant protein M17 OS=Arabidopsis thaliana OX=3702 GN=M17 PE=2	64	PVVEPQQDWGGR	NH2-PVVEPQQDWGGR-COOH	12	77	45	NH2			64_PVVEPQQDWGGR
Q9SIN3		Q9SIN3_ARATH Late embryogenesis abundant domain-containing protein / LEA domain-containing protein OS=Arabidopsis thaliana OX=3702 GN=At2g42560 PE=4	496	QPGFVSGAR	NH2-Q<Pyr>PGFVSGAR-COOH	9	63	45	NH2	Q<Pyr>		496_QPGFVSGAR
Q9FME2		NTF2_ARATH Nuclear transport factor 2 OS=Arabidopsis thaliana OX=3702 GN=NTF2 PE=1	2	AQQEASPSPGAEVVGR	Ace-AQQEASPSPGAEVVGR-COOH	16	61	45	Ace		Ace	2_AQQEASPSPGAEVVGR
Q42403		TRXH3_ARATH Thioredoxin H3 OS=Arabidopsis thaliana OX=3702 GN=TRX3 PE=1	2	AAEGEVIACH	Ace-AAEGEVIAC<Cmm*>H-COOH	10	60	42	Ace		Ace	2_AAEGEVIACH
F4HXW5	Q39133 (124-133)	F4HXW5_ARATH Polyketide cyclase/dehydrase and lipid transport superfamily protein OS=Arabidopsis thaliana OX=3702 GN=At1g14940 PE=4	108	NENSPEPINY	NH2-NENSPEPINY-COOH	10	51	41	NH2			108_NENSPEPINY
F4J5M9		CLC3_ARATH Clathrin light chain 3 OS=Arabidopsis thaliana OX=3702 GN=At3g51890 PE=1	18	STEVDGGDGGNFTAYESR	NH2-STEVDGGDGGNFTAYESR-COOH	18	117	37	NH2			18_STEVDGGDGGNFTAYESR
Q9SK09		VCL22_ARATH Vicilin-like seed storage protein At2g28490 OS=Arabidopsis thaliana OX=3702 GN=At2g28490 PE=2	53	GGGGGGGAWGGEGEGGGEWGGGGEGGGGGR	NH2-GGGGGGGAWGGEGEGGGEWGGGGEGGGGGR-COOH	30	48	32	NH2			53_GGGGGGGAWGGEGEGGGEWGGGGEGGGGGR
A0A1P8B543	F4JLA9 (137-154)^AQ96318 (137-154)	A0A1P8B543_ARATH Cruciferin 3 OS=Arabidopsis thaliana OX=3702 GN=CRU3 PE=1	137	GQQGQPWEGQGQQGQQGR	But-GQQGQPWEGQGQQGQQGR-COOH	18	105	42	But			137_GQQGQPWEGQGQQGQQGR	But
A0A1P8B543	F4JLA9 (137-154)^AQ96318 (137-154)	A0A1P8B543_ARATH Cruciferin 3 OS=Arabidopsis thaliana OX=3702 GN=CRU3 PE=1	137	GQQGQPWEGQGQQGQQGR	But-GQQGQPWEGQGQQGQQGR-COOH	18	61	42	But			137_GQQGQPWEGQGQQGQQGR	But
Q9SK09		VCL22_ARATH Vicilin-like seed storage protein At2g28490 OS=Arabidopsis thaliana OX=3702 GN=At2g28490 PE=2	54	GGGGGGAWGGEGEGGGEWGGGGEGGGGGR	NH2-GGGGGGAWGGEGEGGGEWGGGGEGGGGGR-COOH	29	85	33	NH2			54_GGGGGGAWGGEGEGGGEWGGGGEGGGGGR
F4J8I3	Q93W87 (2-15)	F4J8I3_ARATH C2H2 and C2HC zinc fingers superfamily protein OS=Arabidopsis thaliana OX=3702 GN=At3g05760 PE=4	2	ASSNTTTGVDNTFR	Ace-ASSNTTTGVDNTFR-COOH	14	76	43	Ace		Ace	2_ASSNTTTGVDNTFR
A0A1P8B543	F4JLA9 (137-154)^AQ96318 (137-154)	A0A1P8B543_ARATH Cruciferin 3 OS=Arabidopsis thaliana OX=3702 GN=CRU3 PE=1	137	GQQGQPWEGQGQQGQQGR	But4C13-GQQGQPWEGQGQQGQQGR-COOH	18	68	42	But4C13			137_GQQGQPWEGQGQQGQQGR	But
P29525		OLEO1_ARATH Oleosin 18.5 kDa OS=Arabidopsis thaliana OX=3702 GN=At4g25140 PE=2	34	GSDYSKSR	But4C13-GSDYSK<But4C13>SR-COOH	8	63	44	But4C13			34_GSDYSKSR	But
P15455	F4K8S2 (221-233)	CRU1_ARATH 12S seed storage protein CRA1 OS=Arabidopsis thaliana OX=3702 GN=CRA1 PE=1	408	TNANAQINTLAGR	NH2-TNANAQINTLAGR-COOH	13	48	45	NH2			408_TNANAQINTLAGR
Q9SK09		VCL22_ARATH Vicilin-like seed storage protein At2g28490 OS=Arabidopsis thaliana OX=3702 GN=At2g28490 PE=2	56	GGGGAWGGEGEGGGEWGGGGEGGGGGR	NH2-GGGGAWGGEGEGGGEWGGGGEGGGGGR-COOH	27	99	35	NH2			56_GGGGAWGGEGEGGGEWGGGGEGGGGGR
Q9SIN3		Q9SIN3_ARATH Late embryogenesis abundant domain-containing protein / LEA domain-containing protein OS=Arabidopsis thaliana OX=3702 GN=At2g42560 PE=4	496	QPGFVSGAR	NH2-Q<Pyr>PGFVSGAR-COOH	9	72	45	NH2	Q<Pyr>		496_QPGFVSGAR
P28769		TCPA_ARATH T-complex protein 1 subunit alpha OS=Arabidopsis thaliana OX=3702 GN=CCT1 PE=1	2	SISAQNPDISGDR	Ace-SISAQNPDISGDR-COOH	13	58	44	Ace		Ace	2_SISAQNPDISGDR
Q9SK09		VCL22_ARATH Vicilin-like seed storage protein At2g28490 OS=Arabidopsis thaliana OX=3702 GN=At2g28490 PE=2	56	GGGGAWGGEGEGGGEWGGGGEGGGGGR	NH2-GGGGAWGGEGEGGGEWGGGGEGGGGGR-COOH	27	104	34	NH2			56_GGGGAWGGEGEGGGEWGGGGEGGGGGR
F4K0K7	P30185 (61-87)	F4K0K7_ARATH Dehydrin family protein OS=Arabidopsis thaliana OX=3702 GN=RAB18 PE=3	61	GQGYGTGGQGYGTGTGTEGFGTGGGAR	NH2-GQGYGTGGQGYGTGTGTEGFGTGGGAR-COOH	27	40	39	NH2			61_GQGYGTGGQGYGTGTGTEGFGTGGGAR
P15455		CRU1_ARATH 12S seed storage protein CRA1 OS=Arabidopsis thaliana OX=3702 GN=CRA1 PE=1	113	AETFQDSSEFQPR	NH2-AETFQDSSEFQPR-COOH	13	81	42	NH2			113_AETFQDSSEFQPR
P15455	F4JLA9 (415-424)^AF4K8S2 (248-257)^AQ96318 (486-495)	CRU1_ARATH 12S seed storage protein CRA1 OS=Arabidopsis thaliana OX=3702 GN=CRA1 PE=1	435	GFQISPEEAR	NH2-GFQISPEEAR-COOH	10	58	46	NH2			435_GFQISPEEAR
A0A1P8B543	F4JLA9 (114-135)^AQ96318 (114-135)	A0A1P8B543_ARATH Cruciferin 3 OS=Arabidopsis thaliana OX=3702 GN=CRU3 PE=1	114	AETFMDSQPMQGQQQGQPWQGR	NH2-AETFM<Mox*>DSQPM<Mox*>QGQQQGQPWQGR-COOH	22	39	37	NH2			114_AETFMDSQPMQGQQQGQPWQGR
P15459		2SS3_ARATH 2S seed storage protein 3 OS=Arabidopsis thaliana OX=3702 GN=AT2S3 PE=1	107	VCPTLKQAAR	NH2-VC<Cmm*>PTLK<But4C13>QAAR-COOH	10	45	45	NH2			107_VCPTLKQAAR
Q9SK09		VCL22_ARATH Vicilin-like seed storage protein At2g28490 OS=Arabidopsis thaliana OX=3702 GN=At2g28490 PE=2	69	GEWGGGGEGGGGGR	But4C13-GEWGGGGEGGGGGR-COOH	14	60	39	But4C13			69_GEWGGGGEGGGGGR	But
Q9FN03		UVR8_ARATH Ultraviolet-B receptor UVR8 OS=Arabidopsis thaliana OX=3702 GN=UVR8 PE=1	2	AEDMAADEVTAPPR	Ace-AEDM<Mox*>AADEVTAPPR-COOH	14	42	41	Ace		Ace	2_AEDMAADEVTAPPR
Q9C8F1	Q9S825 (2-11)	IF5Y_ARATH Probable eukaryotic translation initiation factor 5-1 OS=Arabidopsis thaliana OX=3702 GN=At1g36730 PE=2	2	ALQNIGASNR	Ace-ALQNIGASNR-COOH	10	53	44	Ace		Ace	2_ALQNIGASNR
A0A1P8B543	F4JLA9 (114-135)^AQ96318 (114-135)	A0A1P8B543_ARATH Cruciferin 3 OS=Arabidopsis thaliana OX=3702 GN=CRU3 PE=1	114	AETFMDSQPMQGQQQGQPWQGR	NH2-AETFM<Mox*>DSQPM<Mox*>QGQQQGQPWQGR-COOH	22	58	38	NH2			114_AETFMDSQPMQGQQQGQPWQGR
A0A1P8B543	F4JLA9 (114-135)^AQ96318 (114-135)	A0A1P8B543_ARATH Cruciferin 3 OS=Arabidopsis thaliana OX=3702 GN=CRU3 PE=1	114	AETFMDSQPMQGQQQGQPWQGR	NH2-AETFM<Mox*>DSQPM<Mox*>QGQQQGQPWQGR-COOH	22	95	38	NH2			114_AETFMDSQPMQGQQQGQPWQGR
A0A1P8B543	F4JLA9 (143-154)^AQ96318 (143-154)	A0A1P8B543_ARATH Cruciferin 3 OS=Arabidopsis thaliana OX=3702 GN=CRU3 PE=1	143	WEGQGQQGQQGR	But-WEGQGQQGQQGR-COOH	12	81	42	But			143_WEGQGQQGQQGR	But
B3H6E4	F4JIE0 (2-9)^AQ8W108 (2-9)	B3H6E4_ARATH 1,2-dihydroxy-3-keto-5-methylthiopentene dioxygenase OS=Arabidopsis thaliana OX=3702 GN=ATARD2 PE=3	2	GEVVKDGR	Ace-GEVVK<But4C13>DGR-COOH	8	47	46	Ace		Ace	2_GEVVKDGR
P15455		CRU1_ARATH 12S seed storage protein CRA1 OS=Arabidopsis thaliana OX=3702 GN=CRA1 PE=1	113	AETFQDSSEFQPR	NH2-AETFQDSSEFQPR-COOH	13	92	42	NH2			113_AETFQDSSEFQPR
A0A1P8BD35	B3H785 (49-65)^AQ9M042 (83-99)	A0A1P8BD35_ARATH PEBP (Phosphatidylethanolamine-binding protein) family protein OS=Arabidopsis thaliana OX=3702 GN=At5g01300 PE=4	83	GLPEGYSGNEDQTTGIR	NH2-GLPEGYSGNEDQTTGIR-COOH	17	77	44	NH2			83_GLPEGYSGNEDQTTGIR
Q3E8H9	Q9FKV7 (114-121)	Q3E8H9_ARATH Late embryogenesis abundant protein (LEA) family protein OS=Arabidopsis thaliana OX=3702 GN=At5g44310 PE=4	78	KVNEGASR	But4C13-K<But4C13>VNEGASR-COOH	8	56	44	But4C13			78_KVNEGASR	But
A0A1P8B543	F4JLA9 (172-190)^AQ96318 (172-190)	A0A1P8B543_ARATH Cruciferin 3 OS=Arabidopsis thaliana OX=3702 GN=CRU3 PE=1	156	GQQGQPWEGQGQQGQQGFR	NH2-GQQGQPWEGQGQQGQQGFR-COOH	19	55	42	NH2			156_GQQGQPWEGQGQQGQQGFR
Q9FN03		UVR8_ARATH Ultraviolet-B receptor UVR8 OS=Arabidopsis thaliana OX=3702 GN=UVR8 PE=1	2	AEDMAADEVTAPPR	Ace-AEDM<Mox*>AADEVTAPPR-COOH	14	51	41	Ace		Ace	2_AEDMAADEVTAPPR
Q9C8F1	Q9S825 (2-11)	IF5Y_ARATH Probable eukaryotic translation initiation factor 5-1 OS=Arabidopsis thaliana OX=3702 GN=At1g36730 PE=2	2	ALQNIGASNR	Ace-ALQNIGASNR-COOH	10	48	44	Ace		Ace	2_ALQNIGASNR
A0A1P8B7I6	F4JQF1 (236-254)	A0A1P8B7I6_ARATH Late embryogenesis abundant (LEA) protein OS=Arabidopsis thaliana OX=3702 GN=AP22.17 PE=4	242	MATDTSGEAKDSAYGTYER	NH2-M<Mox*>ATDTSGEAK<But4C13>DSAYGTYER-COOH	19	109	40	NH2			242_MATDTSGEAKDSAYGTYER
A0A1P8B543	F4JLA9 (114-135)^AQ96318 (114-135)	A0A1P8B543_ARATH Cruciferin 3 OS=Arabidopsis thaliana OX=3702 GN=CRU3 PE=1	114	AETFMDSQPMQGQQQGQPWQGR	NH2-AETFM<Mox*>DSQPM<Mox*>QGQQQGQPWQGR-COOH	22	64	38	NH2			114_AETFMDSQPMQGQQQGQPWQGR
Q96274		Q96274_ARATH Major latex homologue type2 OS=Arabidopsis thaliana OX=3702 GN=MLP2 PE=2	124	NEDSPEPINY	NH2-NEDSPEPINY-COOH	10	49	40	NH2			124_NEDSPEPINY
Q9SKP0	A0A1P8B189 (2-10)	ECP63_ARATH Late embryogenesis abundant protein ECP63 OS=Arabidopsis thaliana OX=3702 GN=ECP63 PE=2	2	ASDKQKAER	Ace-ASDK<But>QK<But>AER-COOH	9	77	45	Ace		Ace	2_ASDKQKAER
Q9SIN3		Q9SIN3_ARATH Late embryogenesis abundant domain-containing protein / LEA domain-containing protein OS=Arabidopsis thaliana OX=3702 GN=At2g42560 PE=4	240	ESVGEGAQKAGSATSEKAQR	NH2-ESVGEGAQK<But4C13>AGSATSEK<But4C13>AQR-COOH	20	61	46	NH2			240_ESVGEGAQKAGSATSEKAQR
A0A1P8B543	F4JLA9 (171-190)^AQ96318 (171-190)	A0A1P8B543_ARATH Cruciferin 3 OS=Arabidopsis thaliana OX=3702 GN=CRU3 PE=1	155	QGQQGQPWEGQGQQGQQGFR	NH2-QGQQGQPWEGQGQQGQQGFR-COOH	20	74	41	NH2			155_QGQQGQPWEGQGQQGQQGFR
A0A1P8B543	F4JLA9 (140-154)^AQ96318 (140-154)	A0A1P8B543_ARATH Cruciferin 3 OS=Arabidopsis thaliana OX=3702 GN=CRU3 PE=1	140	GQPWEGQGQQGQQGR	But-GQPWEGQGQQGQQGR-COOH	15	95	42	But			140_GQPWEGQGQQGQQGR	But
A0A1P8B543	F4JLA9 (140-154)^AQ96318 (140-154)	A0A1P8B543_ARATH Cruciferin 3 OS=Arabidopsis thaliana OX=3702 GN=CRU3 PE=1	140	GQPWEGQGQQGQQGR	But-GQPWEGQGQQGQQGR-COOH	15	89	43	But			140_GQPWEGQGQQGQQGR	But
Q9SIN3		Q9SIN3_ARATH Late embryogenesis abundant domain-containing protein / LEA domain-containing protein OS=Arabidopsis thaliana OX=3702 GN=At2g42560 PE=4	215	GKESAGGVGGR	But-GK<But>ESAGGVGGR-COOH	11	68	45	But			215_GKESAGGVGGR	But
Q9SIN3		Q9SIN3_ARATH Late embryogenesis abundant domain-containing protein / LEA domain-containing protein OS=Arabidopsis thaliana OX=3702 GN=At2g42560 PE=4	215	GKESAGGVGGR	But4C13-GK<But4C13>ESAGGVGGR-COOH	11	53	45	But4C13			215_GKESAGGVGGR	But
Q9SKP0	A0A1P8B189 (2-10)	ECP63_ARATH Late embryogenesis abundant protein ECP63 OS=Arabidopsis thaliana OX=3702 GN=ECP63 PE=2	2	ASDKQKAER	Ace-ASDK<But>QK<But>AER-COOH	9	74	45	Ace		Ace	2_ASDKQKAER
A0A1P8B7I6	F4JQF1 (236-254)	A0A1P8B7I6_ARATH Late embryogenesis abundant (LEA) protein OS=Arabidopsis thaliana OX=3702 GN=AP22.17 PE=4	242	MATDTSGEAKDSAYGTYER	NH2-M<Mox*>ATDTSGEAK<But4C13>DSAYGTYER-COOH	19	96	39	NH2			242_MATDTSGEAKDSAYGTYER
Q42431		OLEO4_ARATH Oleosin 20.3 kDa OS=Arabidopsis thaliana OX=3702 GN=OL2 PE=2	37	GAGSDYKSR	But-GAGSDYK<But>SR-COOH	9	62	44	But			37_GAGSDYKSR	But
A0A1P8B543	F4JLA9 (140-154)^AQ96318 (140-154)	A0A1P8B543_ARATH Cruciferin 3 OS=Arabidopsis thaliana OX=3702 GN=CRU3 PE=1	140	GQPWEGQGQQGQQGR	But4C13-GQPWEGQGQQGQQGR-COOH	15	92	43	But4C13			140_GQPWEGQGQQGQQGR	But
A0A1P8B7I6	F4JQF1 (236-254)	A0A1P8B7I6_ARATH Late embryogenesis abundant (LEA) protein OS=Arabidopsis thaliana OX=3702 GN=AP22.17 PE=4	242	MATDTSGEAKDSAYGTYER	NH2-M<Mox*>ATDTSGEAK<But4C13>DSAYGTYER-COOH	19	111	39	NH2			242_MATDTSGEAKDSAYGTYER
A0A2H1ZEH9	Q8H0X6 (40-57)	A0A2H1ZEH9_ARATH Cysteine proteinase inhibitor OS=Arabidopsis thaliana OX=3702 GN=CYSB PE=1	7	VGDVPANQNSGEVESLAR	NH2-VGDVPANQNSGEVESLAR-COOH	18	71	45	NH2			7_VGDVPANQNSGEVESLAR
Q9SIN3		Q9SIN3_ARATH Late embryogenesis abundant domain-containing protein / LEA domain-containing protein OS=Arabidopsis thaliana OX=3702 GN=At2g42560 PE=4	268	GKEAGNMTAEQAAR	But-GK<But>EAGNM<Mox*>TAEQAAR-COOH	14	66	44	But			268_GKEAGNMTAEQAAR	But
Q9SIN3		Q9SIN3_ARATH Late embryogenesis abundant domain-containing protein / LEA domain-containing protein OS=Arabidopsis thaliana OX=3702 GN=At2g42560 PE=4	268	GKEAGNMTAEQAAR	But4C13-GK<But4C13>EAGNM<Mox*>TAEQAAR-COOH	14	78	44	But4C13			268_GKEAGNMTAEQAAR	But
Q8VYI3		ECH2_ARATH Enoyl-CoA hydratase 2, peroxisomal OS=Arabidopsis thaliana OX=3702 GN=ECH2 PE=1	186	QPLTVCEER	NH2-Q<Pyr>PLTVC<Cmm*>EER-COOH	9	52	43	NH2	Q<Pyr>		186_QPLTVCEER
Q9SIN3		Q9SIN3_ARATH Late embryogenesis abundant domain-containing protein / LEA domain-containing protein OS=Arabidopsis thaliana OX=3702 GN=At2g42560 PE=4	268	GKEAGNMTAEQAAR	But-GK<But>EAGNM<Mox*>TAEQAAR-COOH	14	82	44	But			268_GKEAGNMTAEQAAR	But
A0A1P8B543	F4JLA9 (171-190)^AQ96318 (171-190)	A0A1P8B543_ARATH Cruciferin 3 OS=Arabidopsis thaliana OX=3702 GN=CRU3 PE=1	155	QGQQGQPWEGQGQQGQQGFR	NH2-QGQQGQPWEGQGQQGQQGFR-COOH	20	74	42	NH2			155_QGQQGQPWEGQGQQGQQGFR
Q9SIN3		Q9SIN3_ARATH Late embryogenesis abundant domain-containing protein / LEA domain-containing protein OS=Arabidopsis thaliana OX=3702 GN=At2g42560 PE=4	268	GKEAGNMTAEQAAR	But4C13-GK<But4C13>EAGNM<Mox*>TAEQAAR-COOH	14	92	45	But4C13			268_GKEAGNMTAEQAAR	But
Q9SIN3		Q9SIN3_ARATH Late embryogenesis abundant domain-containing protein / LEA domain-containing protein OS=Arabidopsis thaliana OX=3702 GN=At2g42560 PE=4	268	GKEAGNMTAEQAAR	But4C13-GK<But4C13>EAGNM<Mox*>TAEQAAR-COOH	14	91	44	But4C13			268_GKEAGNMTAEQAAR	But
P15455	F4K8S2 (221-233)	CRU1_ARATH 12S seed storage protein CRA1 OS=Arabidopsis thaliana OX=3702 GN=CRA1 PE=1	408	TNANAQINTLAGR	NH2-TNANAQINTLAGR-COOH	13	85	45	NH2			408_TNANAQINTLAGR
A0A1P8B7I6	F4JQF1 (236-254)	A0A1P8B7I6_ARATH Late embryogenesis abundant (LEA) protein OS=Arabidopsis thaliana OX=3702 GN=AP22.17 PE=4	242	MATDTSGEAKDSAYGTYER	NH2-M<Mox*>ATDTSGEAK<But4C13>DSAYGTYER-COOH	19	116	40	NH2			242_MATDTSGEAKDSAYGTYER
Q9SIN3		Q9SIN3_ARATH Late embryogenesis abundant domain-containing protein / LEA domain-containing protein OS=Arabidopsis thaliana OX=3702 GN=At2g42560 PE=4	240	ESVGEGAQKAGSATSEKAQR	NH2-ESVGEGAQK<But4C13>AGSATSEK<But4C13>AQR-COOH	20	152	45	NH2			240_ESVGEGAQKAGSATSEKAQR
A0A1P8B7I6	F4JQF1 (236-254)	A0A1P8B7I6_ARATH Late embryogenesis abundant (LEA) protein OS=Arabidopsis thaliana OX=3702 GN=AP22.17 PE=4	242	MATDTSGEAKDSAYGTYER	NH2-M<Mox*>ATDTSGEAK<But4C13>DSAYGTYER-COOH	19	58	39	NH2			242_MATDTSGEAKDSAYGTYER
P15455	F4K8S2 (43-58)	CRU1_ARATH 12S seed storage protein CRA1 OS=Arabidopsis thaliana OX=3702 GN=CRA1 PE=1	230	IDLQTAQQLQNQDDNR	NH2-IDLQTAQQLQNQDDNR-COOH	16	87	44	NH2			230_IDLQTAQQLQNQDDNR
Q8H110		XCT_ARATH Protein XAP5 CIRCADIAN TIMEKEEPER OS=Arabidopsis thaliana OX=3702 GN=XCT PE=1	2	SGMGDGYVGTAQDAVR	Ace-SGM<Mox*>GDGYVGTAQDAVR-COOH	16	73	41	Ace		Ace	2_SGMGDGYVGTAQDAVR
F4KG52	Q04980 (580-595)	F4KG52_ARATH CAP160 protein OS=Arabidopsis thaliana OX=3702 GN=LTI65 PE=4	579	SVEESPQSLGTTVGTM	NH2-SVEESPQSLGTTVGTM<Mox*>-COOH	16	49	43	NH2			579_SVEESPQSLGTTVGTM
Q940I4		Q940I4_ARATH YbaK/aminoacyl-tRNA synthetase-associated domain-containing protein OS=Arabidopsis thaliana OX=3702 GN=Z97341.16 PE=1	1	MDDGEGMETAAAELER	Ace-M<Mox*>DDGEGM<Mox*>ETAAAELER-COOH	16	52	33	Ace		Ace	1_MDDGEGMETAAAELER
F4J573		F4J573_ARATH Late embryogenesis abundant protein (LEA) family protein OS=Arabidopsis thaliana OX=3702 GN=At3g17520 PE=4	287	VKESLTDDDAE	NH2-VK<But4C13>ESLTDDDAE-COOH	11	46	44	NH2			287_VKESLTDDDAE
Q945Q1		CYT1_ARATH Cysteine proteinase inhibitor 1 OS=Arabidopsis thaliana OX=3702 GN=CYS1 PE=1	2	ADQQAGTIVGGVR	Ace-ADQQAGTIVGGVR-COOH	13	56	45	Ace		Ace	2_ADQQAGTIVGGVR
Q6DYB5		Q6DYB5_ARATH UvrABC system protein A OS=Arabidopsis thaliana OX=3702 GN=At4g00530 PE=2	1	MNPQTDKVVR	Ace-M<Mox*>NPQTDK<But4C13>VVR-COOH	10	82	46	Ace		Ace	1_MNPQTDKVVR
Q42431		OLEO4_ARATH Oleosin 20.3 kDa OS=Arabidopsis thaliana OX=3702 GN=OL2 PE=2	38	AGSDYKSR	But-AGSDYK<But>SR-COOH	8	53	45	But			38_AGSDYKSR	But
F4J5V2	Q84JS5 (192-204)	F4J5V2_ARATH Adenine nucleotide alpha hydrolases-like superfamily protein OS=Arabidopsis thaliana OX=3702 GN=At3g58450 PE=1	185	ETSTSNTKEHKSK	NH2-ETSTSNTK<But>EHK<But>SK<But>-COOH	13	78	45	NH2			185_ETSTSNTKEHKSK
A0A1P8B543	F4JLA9 (96-108)^AQ96318 (96-108)	A0A1P8B543_ARATH Cruciferin 3 OS=Arabidopsis thaliana OX=3702 GN=CRU3 PE=1	96	ISYVVQGTGISGR	NH2-ISYVVQGTGISGR-COOH	13	46	45	NH2			96_ISYVVQGTGISGR
P34790		CP18C_ARATH Peptidyl-prolyl cis-trans isomerase CYP18-3 OS=Arabidopsis thaliana OX=3702 GN=CYP18-3 PE=1	162	PVVVADCGQLS	NH2-PVVVADC<Cmm*>GQLS-COOH	11	62	45	NH2			162_PVVVADCGQLS
Q944A6		SNF4_ARATH Sucrose nonfermenting 4-like protein OS=Arabidopsis thaliana OX=3702 GN=SNF4 PE=1	1	MFGSTLDSSR	Ace-M<Mox*>FGSTLDSSR-COOH	10	52	41	Ace		Ace	1_MFGSTLDSSR
P15455	F4K8S2 (221-233)	CRU1_ARATH 12S seed storage protein CRA1 OS=Arabidopsis thaliana OX=3702 GN=CRA1 PE=1	408	TNANAQINTLAGR	NH2-TNANAQINTLAGR-COOH	13	75	45	NH2			408_TNANAQINTLAGR
Q9FG01		ATO_ARATH Splicing factor SF3a60 homolog OS=Arabidopsis thaliana OX=3702 GN=ATO PE=1	2	SSTLLEQTR	Ace-SSTLLEQTR-COOH	9	58	46	Ace		Ace	2_SSTLLEQTR
Q9S7S3		M17_ARATH Late embryogenesis abundant protein M17 OS=Arabidopsis thaliana OX=3702 GN=M17 PE=2	262	SQAEANEVVETVE	NH2-SQAEANEVVETVE-COOH	13	44	43	NH2			262_SQAEANEVVETVE
Q9LSU9		Q9LSU9_ARATH AT3g25550/MWL2_17 OS=Arabidopsis thaliana OX=3702 GN=At3g25545 PE=1	1	MEDVLTENPPPSR	Ace-M<Mox*>EDVLTENPPPSR-COOH	13	91	43	Ace		Ace	1_MEDVLTENPPPSR
Q9C829		NU50A_ARATH Nuclear pore complex protein NUP50A OS=Arabidopsis thaliana OX=3702 GN=NUP50A PE=1	2	GDSENVQQPSKKR	Ace-GDSENVQQPSK<But>K<But>R-COOH	13	47	45	Ace		Ace	2_GDSENVQQPSKKR
Q9LSU9		Q9LSU9_ARATH AT3g25550/MWL2_17 OS=Arabidopsis thaliana OX=3702 GN=At3g25545 PE=1	1	MEDVLTENPPPSR	Ace-M<Mox*>EDVLTENPPPSR-COOH	13	69	43	Ace		Ace	1_MEDVLTENPPPSR
Q9S7S3		M17_ARATH Late embryogenesis abundant protein M17 OS=Arabidopsis thaliana OX=3702 GN=M17 PE=2	262	SQAEANEVVETVE	NH2-SQAEANEVVETVE-COOH	13	57	43	NH2			262_SQAEANEVVETVE
P42730		CLPB1_ARATH Chaperone protein ClpB1 OS=Arabidopsis thaliana OX=3702 GN=CLPB1 PE=1	897	IEEIEDDDNEEMIED	NH2-IEEIEDDDNEEM<Mox*>IED-COOH	15	41	30	NH2			897_IEEIEDDDNEEMIED
F4JLA9	Q96318 (459-471)	F4JLA9_ARATH Cruciferin 3 OS=Arabidopsis thaliana OX=3702 GN=CRU3 PE=1	388	TNENAMISTLAGR	NH2-TNENAM<Mox*>ISTLAGR-COOH	13	51	45	NH2			388_TNENAMISTLAGR
F4J573		F4J573_ARATH Late embryogenesis abundant protein (LEA) family protein OS=Arabidopsis thaliana OX=3702 GN=At3g17520 PE=4	289	ESLTDDDAEL	NH2-ESLTDDDAEL-COOH	10	42	40	NH2			289_ESLTDDDAEL
F4KG52	Q04980 (580-595)	F4KG52_ARATH CAP160 protein OS=Arabidopsis thaliana OX=3702 GN=LTI65 PE=4	579	SVEESPQSLGTTVGTM	NH2-SVEESPQSLGTTVGTM<Mox*>-COOH	16	48	43	NH2			579_SVEESPQSLGTTVGTM
A0A1P8B543	Q96318 (317-325)	A0A1P8B543_ARATH Cruciferin 3 OS=Arabidopsis thaliana OX=3702 GN=CRU3 PE=1	301	QPYESEEWR	NH2-Q<Pyr>PYESEEWR-COOH	9	46	40	NH2	Q<Pyr>		301_QPYESEEWR
Q945Q1		CYT1_ARATH Cysteine proteinase inhibitor 1 OS=Arabidopsis thaliana OX=3702 GN=CYS1 PE=1	2	ADQQAGTIVGGVR	Ace-ADQQAGTIVGGVR-COOH	13	71	45	Ace		Ace	2_ADQQAGTIVGGVR
A0A1P8B543	Q96318 (317-325)	A0A1P8B543_ARATH Cruciferin 3 OS=Arabidopsis thaliana OX=3702 GN=CRU3 PE=1	301	QPYESEEWR	NH2-QPYESEEWR-COOH	9	50	41	NH2			301_QPYESEEWR
F4JLA9	Q96318 (136-170)	F4JLA9_ARATH Cruciferin 3 OS=Arabidopsis thaliana OX=3702 GN=CRU3 PE=1	136	QGQQGQPWEGQGQQGQQGRQGQPWEGQGQQGQQGR	NH2-Q<Pyr>GQQGQPWEGQGQQGQQGRQGQPWEGQGQQGQQGR-COOH	35	51	40	NH2	Q<Pyr>		136_QGQQGQPWEGQGQQGQQGRQGQPWEGQGQQGQQGR
A0A1P8B543	Q96318 (317-325)	A0A1P8B543_ARATH Cruciferin 3 OS=Arabidopsis thaliana OX=3702 GN=CRU3 PE=1	301	QPYESEEWR	NH2-Q<Pyr>PYESEEWR-COOH	9	57	40	NH2	Q<Pyr>		301_QPYESEEWR
Q945Q1		CYT1_ARATH Cysteine proteinase inhibitor 1 OS=Arabidopsis thaliana OX=3702 GN=CYS1 PE=1	2	ADQQAGTIVGGVR	Ace-ADQQAGTIVGGVR-COOH	13	92	45	Ace		Ace	2_ADQQAGTIVGGVR
A0A1P8B543	Q96318 (317-325)	A0A1P8B543_ARATH Cruciferin 3 OS=Arabidopsis thaliana OX=3702 GN=CRU3 PE=1	301	QPYESEEWR	NH2-QPYESEEWR-COOH	9	47	41	NH2			301_QPYESEEWR
Q93WK6		Q93WK6_ARATH DNA polymerase epsilon catalytic subunit A OS=Arabidopsis thaliana OX=3702 GN=At1g19530 PE=2	2	GSLMSGWDSR	Ace-GSLM<Mox*>SGWDSR-COOH	10	47	40	Ace		Ace	2_GSLMSGWDSR
P15455	F4K8S2 (43-58)	CRU1_ARATH 12S seed storage protein CRA1 OS=Arabidopsis thaliana OX=3702 GN=CRA1 PE=1	230	IDLQTAQQLQNQDDNR	NH2-IDLQTAQQLQNQDDNR-COOH	16	68	45	NH2			230_IDLQTAQQLQNQDDNR
O22978		O22978_ARATH T19F6.7 protein OS=Arabidopsis thaliana OX=3702 GN=T19F6.7 PE=1	2	ASEGVVVVGGER	Ace-ASEGVVVVGGER-COOH	12	62	45	Ace		Ace	2_ASEGVVVVGGER
A0A1P8B543	Q96318 (317-325)	A0A1P8B543_ARATH Cruciferin 3 OS=Arabidopsis thaliana OX=3702 GN=CRU3 PE=1	301	QPYESEEWR	NH2-Q<Pyr>PYESEEWR-COOH	9	57	40	NH2	Q<Pyr>		301_QPYESEEWR
A0A1P8B543	F4JLA9 (171-190)^AQ96318 (171-190)	A0A1P8B543_ARATH Cruciferin 3 OS=Arabidopsis thaliana OX=3702 GN=CRU3 PE=1	155	QGQQGQPWEGQGQQGQQGFR	NH2-Q<Pyr>GQQGQPWEGQGQQGQQGFR-COOH	20	88	42	NH2	Q<Pyr>		155_QGQQGQPWEGQGQQGQQGFR
A0A1P8B543	F4JLA9 (171-190)^AQ96318 (171-190)	A0A1P8B543_ARATH Cruciferin 3 OS=Arabidopsis thaliana OX=3702 GN=CRU3 PE=1	155	QGQQGQPWEGQGQQGQQGFR	NH2-QGQQGQPWEGQGQQGQQGFR-COOH	20	92	42	NH2			155_QGQQGQPWEGQGQQGQQGFR
Q3EDJ0		AB19I_ARATH ABC transporter I family member 19 OS=Arabidopsis thaliana OX=3702 GN=ABCI19 PE=2	2	AEKDATASGDDAIR	Ace-AEK<But4C13>DATASGDDAIR-COOH	14	67	45	Ace		Ace	2_AEKDATASGDDAIR
A0A1P8B543	F4JLA9 (171-190)^AQ96318 (171-190)	A0A1P8B543_ARATH Cruciferin 3 OS=Arabidopsis thaliana OX=3702 GN=CRU3 PE=1	155	QGQQGQPWEGQGQQGQQGFR	NH2-QGQQGQPWEGQGQQGQQGFR-COOH	20	90	43	NH2			155_QGQQGQPWEGQGQQGQQGFR
A0A1P8B543	F4JLA9 (171-190)^AQ96318 (171-190)	A0A1P8B543_ARATH Cruciferin 3 OS=Arabidopsis thaliana OX=3702 GN=CRU3 PE=1	155	QGQQGQPWEGQGQQGQQGFR	NH2-QGQQGQPWEGQGQQGQQGFR-COOH	20	86	42	NH2			155_QGQQGQPWEGQGQQGQQGFR
Q9LHG9		NACA1_ARATH Nascent polypeptide-associated complex subunit alpha-like protein 1 OS=Arabidopsis thaliana OX=3702 GN=At3g12390 PE=1	51	GEAGGKSKQSR	But-GEAGGK<But>SK<But>QSR-COOH	11	58	46	But			51_GEAGGKSKQSR	But
A0A1P8B543	F4JLA9 (171-190)^AQ96318 (171-190)	A0A1P8B543_ARATH Cruciferin 3 OS=Arabidopsis thaliana OX=3702 GN=CRU3 PE=1	155	QGQQGQPWEGQGQQGQQGFR	NH2-Q<Pyr>GQQGQPWEGQGQQGQQGFR-COOH	20	94	41	NH2	Q<Pyr>		155_QGQQGQPWEGQGQQGQQGFR
O64948		LONP2_ARATH Lon protease homolog 2, peroxisomal OS=Arabidopsis thaliana OX=3702 GN=LON2 PE=2	2	AETVELPSR	Ace-AETVELPSR-COOH	9	50	45	Ace		Ace	2_AETVELPSR
A0A1P8B543	F4JLA9 (171-190)^AQ96318 (171-190)	A0A1P8B543_ARATH Cruciferin 3 OS=Arabidopsis thaliana OX=3702 GN=CRU3 PE=1	155	QGQQGQPWEGQGQQGQQGFR	NH2-QGQQGQPWEGQGQQGQQGFR-COOH	20	86	41	NH2			155_QGQQGQPWEGQGQQGQQGFR
A0A1P8B543	Q96318 (317-325)	A0A1P8B543_ARATH Cruciferin 3 OS=Arabidopsis thaliana OX=3702 GN=CRU3 PE=1	301	QPYESEEWR	NH2-QPYESEEWR-COOH	9	51	41	NH2			301_QPYESEEWR
P47998		CYSK1_ARATH Cysteine synthase 1 OS=Arabidopsis thaliana OX=3702 GN=OASA1 PE=1	313	KEAEAMTFEA	NH2-K<But>EAEAM<Mox*>TFEA-COOH	10	57	42	NH2			313_KEAEAMTFEA
A0A1P8B543	Q96318 (317-325)	A0A1P8B543_ARATH Cruciferin 3 OS=Arabidopsis thaliana OX=3702 GN=CRU3 PE=1	301	QPYESEEWR	NH2-Q<Pyr>PYESEEWR-COOH	9	58	39	NH2	Q<Pyr>		301_QPYESEEWR
A0A1P8B543	F4JLA9 (171-190)^AQ96318 (171-190)	A0A1P8B543_ARATH Cruciferin 3 OS=Arabidopsis thaliana OX=3702 GN=CRU3 PE=1	155	QGQQGQPWEGQGQQGQQGFR	NH2-Q<Pyr>GQQGQPWEGQGQQGQQGFR-COOH	20	102	41	NH2	Q<Pyr>		155_QGQQGQPWEGQGQQGQQGFR
A0A1P8B543	F4JLA9 (171-190)^AQ96318 (171-190)	A0A1P8B543_ARATH Cruciferin 3 OS=Arabidopsis thaliana OX=3702 GN=CRU3 PE=1	155	QGQQGQPWEGQGQQGQQGFR	NH2-QGQQGQPWEGQGQQGQQGFR-COOH	20	96	42	NH2			155_QGQQGQPWEGQGQQGQQGFR
A0A1P8B543	F4JLA9 (171-190)^AQ96318 (171-190)	A0A1P8B543_ARATH Cruciferin 3 OS=Arabidopsis thaliana OX=3702 GN=CRU3 PE=1	155	QGQQGQPWEGQGQQGQQGFR	NH2-Q<Pyr>GQQGQPWEGQGQQGQQGFR-COOH	20	93	41	NH2	Q<Pyr>		155_QGQQGQPWEGQGQQGQQGFR
Q8W4Q4		MRF3_ARATH MA3 DOMAIN-CONTAINING TRANSLATION REGULATORY FACTOR 3 OS=Arabidopsis thaliana OX=3702 GN=MRF3 PE=1	1	MEGFLTDQQR	Ace-M<Mox*>EGFLTDQQR-COOH	10	57	43	Ace		Ace	1_MEGFLTDQQR
A0A1P8B543	F4JLA9 (171-190)^AQ96318 (171-190)	A0A1P8B543_ARATH Cruciferin 3 OS=Arabidopsis thaliana OX=3702 GN=CRU3 PE=1	155	QGQQGQPWEGQGQQGQQGFR	NH2-QGQQGQPWEGQGQQGQQGFR-COOH	20	115	42	NH2			155_QGQQGQPWEGQGQQGQQGFR
A0A1P8B543	Q96318 (317-325)	A0A1P8B543_ARATH Cruciferin 3 OS=Arabidopsis thaliana OX=3702 GN=CRU3 PE=1	301	QPYESEEWR	NH2-QPYESEEWR-COOH	9	51	41	NH2			301_QPYESEEWR
A0A1P8B543	F4JLA9 (171-190)^AQ96318 (171-190)	A0A1P8B543_ARATH Cruciferin 3 OS=Arabidopsis thaliana OX=3702 GN=CRU3 PE=1	155	QGQQGQPWEGQGQQGQQGFR	NH2-Q<Pyr>GQQGQPWEGQGQQGQQGFR-COOH	20	101	41	NH2	Q<Pyr>		155_QGQQGQPWEGQGQQGQQGFR
A0A1P8B543	Q96318 (317-325)	A0A1P8B543_ARATH Cruciferin 3 OS=Arabidopsis thaliana OX=3702 GN=CRU3 PE=1	301	QPYESEEWR	NH2-Q<Pyr>PYESEEWR-COOH	9	57	39	NH2	Q<Pyr>		301_QPYESEEWR
A0A1P8B543	F4JLA9 (171-190)^AQ96318 (171-190)	A0A1P8B543_ARATH Cruciferin 3 OS=Arabidopsis thaliana OX=3702 GN=CRU3 PE=1	155	QGQQGQPWEGQGQQGQQGFR	NH2-QGQQGQPWEGQGQQGQQGFR-COOH	20	45	42	NH2			155_QGQQGQPWEGQGQQGQQGFR
A0A1P8B543	F4JLA9 (171-190)^AQ96318 (171-190)	A0A1P8B543_ARATH Cruciferin 3 OS=Arabidopsis thaliana OX=3702 GN=CRU3 PE=1	155	QGQQGQPWEGQGQQGQQGFR	NH2-Q<Pyr>GQQGQPWEGQGQQGQQGFR-COOH	20	94	41	NH2	Q<Pyr>		155_QGQQGQPWEGQGQQGQQGFR
A0A1P8B543	F4JLA9 (171-190)^AQ96318 (171-190)	A0A1P8B543_ARATH Cruciferin 3 OS=Arabidopsis thaliana OX=3702 GN=CRU3 PE=1	155	QGQQGQPWEGQGQQGQQGFR	NH2-QGQQGQPWEGQGQQGQQGFR-COOH	20	97	42	NH2			155_QGQQGQPWEGQGQQGQQGFR
A0A1P8B543	Q96318 (317-325)	A0A1P8B543_ARATH Cruciferin 3 OS=Arabidopsis thaliana OX=3702 GN=CRU3 PE=1	301	QPYESEEWR	NH2-QPYESEEWR-COOH	9	51	41	NH2			301_QPYESEEWR
A0A1P8B543	F4JLA9 (171-190)^AQ96318 (171-190)	A0A1P8B543_ARATH Cruciferin 3 OS=Arabidopsis thaliana OX=3702 GN=CRU3 PE=1	155	QGQQGQPWEGQGQQGQQGFR	NH2-Q<Pyr>GQQGQPWEGQGQQGQQGFR-COOH	20	101	41	NH2	Q<Pyr>		155_QGQQGQPWEGQGQQGQQGFR
A0A1P8B543	Q96318 (317-325)	A0A1P8B543_ARATH Cruciferin 3 OS=Arabidopsis thaliana OX=3702 GN=CRU3 PE=1	301	QPYESEEWR	NH2-Q<Pyr>PYESEEWR-COOH	9	58	40	NH2	Q<Pyr>		301_QPYESEEWR
A0A1P8B543	F4JLA9 (171-190)^AQ96318 (171-190)	A0A1P8B543_ARATH Cruciferin 3 OS=Arabidopsis thaliana OX=3702 GN=CRU3 PE=1	155	QGQQGQPWEGQGQQGQQGFR	NH2-QGQQGQPWEGQGQQGQQGFR-COOH	20	99	42	NH2			155_QGQQGQPWEGQGQQGQQGFR
A0A1P8B543	F4JLA9 (171-190)^AQ96318 (171-190)	A0A1P8B543_ARATH Cruciferin 3 OS=Arabidopsis thaliana OX=3702 GN=CRU3 PE=1	155	QGQQGQPWEGQGQQGQQGFR	NH2-Q<Pyr>GQQGQPWEGQGQQGQQGFR-COOH	20	104	41	NH2	Q<Pyr>		155_QGQQGQPWEGQGQQGQQGFR
A8MRX2	F4JWM1 (2-15)^AQ42340 (2-15)^AQ9SK22 (2-15)	A8MRX2_ARATH Ribosomal protein S5 domain 2-like superfamily protein OS=Arabidopsis thaliana OX=3702 GN=At5g18380 PE=3	2	ATQPATESVQCFGR	Ace-ATQPATESVQC<Cmm*>FGR-COOH	14	60	43	Ace		Ace	2_ATQPATESVQCFGR
A0A1P8B543	F4JLA9 (171-190)^AQ96318 (171-190)	A0A1P8B543_ARATH Cruciferin 3 OS=Arabidopsis thaliana OX=3702 GN=CRU3 PE=1	155	QGQQGQPWEGQGQQGQQGFR	NH2-QGQQGQPWEGQGQQGQQGFR-COOH	20	117	42	NH2			155_QGQQGQPWEGQGQQGQQGFR
A0A1P8B543	Q96318 (317-325)	A0A1P8B543_ARATH Cruciferin 3 OS=Arabidopsis thaliana OX=3702 GN=CRU3 PE=1	301	QPYESEEWR	NH2-QPYESEEWR-COOH	9	51	41	NH2			301_QPYESEEWR
A0A1P8B543	F4JLA9 (171-190)^AQ96318 (171-190)	A0A1P8B543_ARATH Cruciferin 3 OS=Arabidopsis thaliana OX=3702 GN=CRU3 PE=1	155	QGQQGQPWEGQGQQGQQGFR	NH2-Q<Pyr>GQQGQPWEGQGQQGQQGFR-COOH	20	100	41	NH2	Q<Pyr>		155_QGQQGQPWEGQGQQGQQGFR
A0A1P8B543	Q96318 (317-325)	A0A1P8B543_ARATH Cruciferin 3 OS=Arabidopsis thaliana OX=3702 GN=CRU3 PE=1	301	QPYESEEWR	NH2-Q<Pyr>PYESEEWR-COOH	9	53	39	NH2	Q<Pyr>		301_QPYESEEWR
P15455	F4K8S2 (43-58)	CRU1_ARATH 12S seed storage protein CRA1 OS=Arabidopsis thaliana OX=3702 GN=CRA1 PE=1	230	IDLQTAQQLQNQDDNR	NH2-IDLQTAQQLQNQDDNR-COOH	16	90	44	NH2			230_IDLQTAQQLQNQDDNR
A0A1P8B543	F4JLA9 (171-190)^AQ96318 (171-190)	A0A1P8B543_ARATH Cruciferin 3 OS=Arabidopsis thaliana OX=3702 GN=CRU3 PE=1	155	QGQQGQPWEGQGQQGQQGFR	NH2-QGQQGQPWEGQGQQGQQGFR-COOH	20	90	42	NH2			155_QGQQGQPWEGQGQQGQQGFR
Q9SIN3		Q9SIN3_ARATH Late embryogenesis abundant domain-containing protein / LEA domain-containing protein OS=Arabidopsis thaliana OX=3702 GN=At2g42560 PE=4	240	ESVGEGAQKAGSATSEKAQR	NH2-ESVGEGAQK<But4C13>AGSATSEK<But4C13>AQR-COOH	20	93	46	NH2			240_ESVGEGAQKAGSATSEKAQR
A0A1P8B543	F4JLA9 (171-190)^AQ96318 (171-190)	A0A1P8B543_ARATH Cruciferin 3 OS=Arabidopsis thaliana OX=3702 GN=CRU3 PE=1	155	QGQQGQPWEGQGQQGQQGFR	NH2-Q<Pyr>GQQGQPWEGQGQQGQQGFR-COOH	20	110	41	NH2	Q<Pyr>		155_QGQQGQPWEGQGQQGQQGFR
Q9SIN3		Q9SIN3_ARATH Late embryogenesis abundant domain-containing protein / LEA domain-containing protein OS=Arabidopsis thaliana OX=3702 GN=At2g42560 PE=4	240	ESVGEGAQKAGSATSEKAQR	NH2-ESVGEGAQK<But4C13>AGSATSEK<But4C13>AQR-COOH	20	78	46	NH2			240_ESVGEGAQKAGSATSEKAQR
A0A1P8B543	F4JLA9 (177-190)^AQ96318 (177-190)	A0A1P8B543_ARATH Cruciferin 3 OS=Arabidopsis thaliana OX=3702 GN=CRU3 PE=1	161	PWEGQGQQGQQGFR	NH2-PWEGQGQQGQQGFR-COOH	14	122	43	NH2			161_PWEGQGQQGQQGFR
A0A1P8B543	F4JLA9 (171-190)^AQ96318 (171-190)	A0A1P8B543_ARATH Cruciferin 3 OS=Arabidopsis thaliana OX=3702 GN=CRU3 PE=1	155	QGQQGQPWEGQGQQGQQGFR	NH2-QGQQGQPWEGQGQQGQQGFR-COOH	20	135	42	NH2			155_QGQQGQPWEGQGQQGQQGFR
A0A1P8B543	Q96318 (317-325)	A0A1P8B543_ARATH Cruciferin 3 OS=Arabidopsis thaliana OX=3702 GN=CRU3 PE=1	301	QPYESEEWR	NH2-QPYESEEWR-COOH	9	51	41	NH2			301_QPYESEEWR
A0A1P8B543	F4JLA9 (171-190)^AQ96318 (171-190)	A0A1P8B543_ARATH Cruciferin 3 OS=Arabidopsis thaliana OX=3702 GN=CRU3 PE=1	155	QGQQGQPWEGQGQQGQQGFR	NH2-Q<Pyr>GQQGQPWEGQGQQGQQGFR-COOH	20	87	41	NH2	Q<Pyr>		155_QGQQGQPWEGQGQQGQQGFR
A0A1P8B543	Q96318 (317-325)	A0A1P8B543_ARATH Cruciferin 3 OS=Arabidopsis thaliana OX=3702 GN=CRU3 PE=1	301	QPYESEEWR	NH2-Q<Pyr>PYESEEWR-COOH	9	58	40	NH2	Q<Pyr>		301_QPYESEEWR
Q9C522	Q9FGX1 (2-9)	ACLB1_ARATH ATP-citrate synthase beta chain protein 1 OS=Arabidopsis thaliana OX=3702 GN=ACLB-1 PE=2	2	ATGQLFSR	Ace-ATGQLFSR-COOH	8	80	46	Ace		Ace	2_ATGQLFSR
A0A1P8B543	F4JLA9 (171-190)^AQ96318 (171-190)	A0A1P8B543_ARATH Cruciferin 3 OS=Arabidopsis thaliana OX=3702 GN=CRU3 PE=1	155	QGQQGQPWEGQGQQGQQGFR	NH2-QGQQGQPWEGQGQQGQQGFR-COOH	20	97	42	NH2			155_QGQQGQPWEGQGQQGQQGFR
Q9SKI2	A0A1P8AZU4 (176-197)	VPS2A_ARATH Vacuolar protein sorting-associated protein 2 homolog 1 OS=Arabidopsis thaliana OX=3702 GN=VPS2.1 PE=1	197	VVQAEATGAEDSGGIDSDLQAR	NH2-VVQAEATGAEDSGGIDSDLQAR-COOH	22	137	43	NH2			197_VVQAEATGAEDSGGIDSDLQAR
Q9SIN3		Q9SIN3_ARATH Late embryogenesis abundant domain-containing protein / LEA domain-containing protein OS=Arabidopsis thaliana OX=3702 GN=At2g42560 PE=4	240	ESVGEGAQKAGSATSEKAQR	NH2-ESVGEGAQK<But4C13>AGSATSEK<But4C13>AQR-COOH	20	68	46	NH2			240_ESVGEGAQKAGSATSEKAQR
A0A1P8B543	F4JLA9 (171-190)^AQ96318 (171-190)	A0A1P8B543_ARATH Cruciferin 3 OS=Arabidopsis thaliana OX=3702 GN=CRU3 PE=1	155	QGQQGQPWEGQGQQGQQGFR	NH2-Q<Pyr>GQQGQPWEGQGQQGQQGFR-COOH	20	121	41	NH2	Q<Pyr>		155_QGQQGQPWEGQGQQGQQGFR
P15455	F4K8S2 (43-58)	CRU1_ARATH 12S seed storage protein CRA1 OS=Arabidopsis thaliana OX=3702 GN=CRA1 PE=1	230	IDLQTAQQLQNQDDNR	NH2-IDLQTAQQLQNQDDNR-COOH	16	81	44	NH2			230_IDLQTAQQLQNQDDNR
Q9SIN3		Q9SIN3_ARATH Late embryogenesis abundant domain-containing protein / LEA domain-containing protein OS=Arabidopsis thaliana OX=3702 GN=At2g42560 PE=4	240	ESVGEGAQKAGSATSEKAQR	NH2-ESVGEGAQK<But4C13>AGSATSEK<But4C13>AQR-COOH	20	146	45	NH2			240_ESVGEGAQKAGSATSEKAQR
Q9SIN3		Q9SIN3_ARATH Late embryogenesis abundant domain-containing protein / LEA domain-containing protein OS=Arabidopsis thaliana OX=3702 GN=At2g42560 PE=4	240	ESVGEGAQKAGSATSEKAQR	NH2-ESVGEGAQK<But4C13>AGSATSEK<But4C13>AQR-COOH	20	166	46	NH2			240_ESVGEGAQKAGSATSEKAQR
A0A1P8B543	F4JLA9 (171-190)^AQ96318 (171-190)	A0A1P8B543_ARATH Cruciferin 3 OS=Arabidopsis thaliana OX=3702 GN=CRU3 PE=1	155	QGQQGQPWEGQGQQGQQGFR	NH2-QGQQGQPWEGQGQQGQQGFR-COOH	20	116	42	NH2			155_QGQQGQPWEGQGQQGQQGFR
A0A1P8B543	Q96318 (317-325)	A0A1P8B543_ARATH Cruciferin 3 OS=Arabidopsis thaliana OX=3702 GN=CRU3 PE=1	301	QPYESEEWR	NH2-QPYESEEWR-COOH	9	51	41	NH2			301_QPYESEEWR
A0A1P8B543	F4JLA9 (171-190)^AQ96318 (171-190)	A0A1P8B543_ARATH Cruciferin 3 OS=Arabidopsis thaliana OX=3702 GN=CRU3 PE=1	155	QGQQGQPWEGQGQQGQQGFR	NH2-Q<Pyr>GQQGQPWEGQGQQGQQGFR-COOH	20	97	41	NH2	Q<Pyr>		155_QGQQGQPWEGQGQQGQQGFR
A0A1P8B543	Q96318 (317-325)	A0A1P8B543_ARATH Cruciferin 3 OS=Arabidopsis thaliana OX=3702 GN=CRU3 PE=1	301	QPYESEEWR	NH2-Q<Pyr>PYESEEWR-COOH	9	57	39	NH2	Q<Pyr>		301_QPYESEEWR
Q9C522	Q9FGX1 (2-9)	ACLB1_ARATH ATP-citrate synthase beta chain protein 1 OS=Arabidopsis thaliana OX=3702 GN=ACLB-1 PE=2	2	ATGQLFSR	Ace-ATGQLFSR-COOH	8	65	46	Ace		Ace	2_ATGQLFSR
Q9C505		IF5A3_ARATH Eukaryotic translation initiation factor 5A-3 OS=Arabidopsis thaliana OX=3702 GN=ELF5A-3 PE=2	2	SDDEHHFESSDAGASKTYPQQAGN	Ace-SDDEHHFESSDAGASK<But4C13>TYPQQAGN-COOH	24	64	37	Ace		Ace	2_SDDEHHFESSDAGASKTYPQQAGN
A0A1P8B543	F4JLA9 (171-190)^AQ96318 (171-190)	A0A1P8B543_ARATH Cruciferin 3 OS=Arabidopsis thaliana OX=3702 GN=CRU3 PE=1	155	QGQQGQPWEGQGQQGQQGFR	NH2-QGQQGQPWEGQGQQGQQGFR-COOH	20	94	42	NH2			155_QGQQGQPWEGQGQQGQQGFR
A0A1P8B543	F4JLA9 (171-190)^AQ96318 (171-190)	A0A1P8B543_ARATH Cruciferin 3 OS=Arabidopsis thaliana OX=3702 GN=CRU3 PE=1	155	QGQQGQPWEGQGQQGQQGFR	NH2-QGQQGQPWEGQGQQGQQGFR-COOH	20	111	42	NH2			155_QGQQGQPWEGQGQQGQQGFR
P15455	F4K8S2 (43-58)	CRU1_ARATH 12S seed storage protein CRA1 OS=Arabidopsis thaliana OX=3702 GN=CRA1 PE=1	230	IDLQTAQQLQNQDDNR	NH2-IDLQTAQQLQNQDDNR-COOH	16	82	45	NH2			230_IDLQTAQQLQNQDDNR
Q9SIN3		Q9SIN3_ARATH Late embryogenesis abundant domain-containing protein / LEA domain-containing protein OS=Arabidopsis thaliana OX=3702 GN=At2g42560 PE=4	240	ESVGEGAQKAGSATSEKAQR	NH2-ESVGEGAQK<But4C13>AGSATSEK<But4C13>AQR-COOH	20	78	46	NH2			240_ESVGEGAQKAGSATSEKAQR
A0A2H1ZEH9	Q8H0X6 (39-57)	A0A2H1ZEH9_ARATH Cysteine proteinase inhibitor OS=Arabidopsis thaliana OX=3702 GN=CYSB PE=1	6	GVGDVPANQNSGEVESLAR	NH2-GVGDVPANQNSGEVESLAR-COOH	19	72	45	NH2			6_GVGDVPANQNSGEVESLAR
Q9SIN3		Q9SIN3_ARATH Late embryogenesis abundant domain-containing protein / LEA domain-containing protein OS=Arabidopsis thaliana OX=3702 GN=At2g42560 PE=4	240	ESVGEGAQKAGSATSEKAQR	NH2-ESVGEGAQK<But>AGSATSEK<But>AQR-COOH	20	160	45	NH2			240_ESVGEGAQKAGSATSEKAQR
A0A1P8B543	F4JLA9 (171-190)^AQ96318 (171-190)	A0A1P8B543_ARATH Cruciferin 3 OS=Arabidopsis thaliana OX=3702 GN=CRU3 PE=1	155	QGQQGQPWEGQGQQGQQGFR	NH2-Q<Pyr>GQQGQPWEGQGQQGQQGFR-COOH	20	109	41	NH2	Q<Pyr>		155_QGQQGQPWEGQGQQGQQGFR
Q9SIN3		Q9SIN3_ARATH Late embryogenesis abundant domain-containing protein / LEA domain-containing protein OS=Arabidopsis thaliana OX=3702 GN=At2g42560 PE=4	240	ESVGEGAQKAGSATSEKAQR	NH2-ESVGEGAQK<But>AGSATSEK<But>AQR-COOH	20	71	45	NH2			240_ESVGEGAQKAGSATSEKAQR
Q9SIN3		Q9SIN3_ARATH Late embryogenesis abundant domain-containing protein / LEA domain-containing protein OS=Arabidopsis thaliana OX=3702 GN=At2g42560 PE=4	240	ESVGEGAQKAGSATSEKAQR	NH2-ESVGEGAQK<But4C13>AGSATSEK<But4C13>AQR-COOH	20	176	46	NH2			240_ESVGEGAQKAGSATSEKAQR
A0A1P8B543	F4JLA9 (171-190)^AQ96318 (171-190)	A0A1P8B543_ARATH Cruciferin 3 OS=Arabidopsis thaliana OX=3702 GN=CRU3 PE=1	155	QGQQGQPWEGQGQQGQQGFR	NH2-Q<Pyr>GQQGQPWEGQGQQGQQGFR-COOH	20	44	40	NH2	Q<Pyr>		155_QGQQGQPWEGQGQQGQQGFR
Q9FL54		DNAJ6_ARATH Chaperone protein dnaJ 6 OS=Arabidopsis thaliana OX=3702 GN=ATJ6 PE=2	251	YGGDAEAEPTEEEFEAAQR	NH2-YGGDAEAEPTEEEFEAAQR-COOH	19	49	38	NH2			251_YGGDAEAEPTEEEFEAAQR
Q9FL54		DNAJ6_ARATH Chaperone protein dnaJ 6 OS=Arabidopsis thaliana OX=3702 GN=ATJ6 PE=2	251	YGGDAEAEPTEEEFEAAQR	NH2-YGGDAEAEPTEEEFEAAQR-COOH	19	48	38	NH2			251_YGGDAEAEPTEEEFEAAQR
A0A1P8B543	Q96318 (317-325)	A0A1P8B543_ARATH Cruciferin 3 OS=Arabidopsis thaliana OX=3702 GN=CRU3 PE=1	301	QPYESEEWR	NH2-QPYESEEWR-COOH	9	51	41	NH2			301_QPYESEEWR
A0A2H1ZEH9	Q8H0X6 (39-57)	A0A2H1ZEH9_ARATH Cysteine proteinase inhibitor OS=Arabidopsis thaliana OX=3702 GN=CYSB PE=1	6	GVGDVPANQNSGEVESLAR	NH2-GVGDVPANQNSGEVESLAR-COOH	19	113	45	NH2			6_GVGDVPANQNSGEVESLAR
Q9SIN3		Q9SIN3_ARATH Late embryogenesis abundant domain-containing protein / LEA domain-containing protein OS=Arabidopsis thaliana OX=3702 GN=At2g42560 PE=4	240	ESVGEGAQKAGSATSEKAQR	NH2-ESVGEGAQK<But4C13>AGSATSEK<But4C13>AQR-COOH	20	144	45	NH2			240_ESVGEGAQKAGSATSEKAQR
A0A1P8B543	Q96318 (317-325)	A0A1P8B543_ARATH Cruciferin 3 OS=Arabidopsis thaliana OX=3702 GN=CRU3 PE=1	301	QPYESEEWR	NH2-Q<Pyr>PYESEEWR-COOH	9	58	39	NH2	Q<Pyr>		301_QPYESEEWR
Q9C9C4		ENO1_ARATH Enolase 1, chloroplastic OS=Arabidopsis thaliana OX=3702 GN=ENO1 PE=1	245	YGQDACNVGDEGGFAPNVQDNR	NH2-YGQDAC<Cmm*>NVGDEGGFAPNVQDNR-COOH	22	66	37	NH2			245_YGQDACNVGDEGGFAPNVQDNR
Q9C9C4		ENO1_ARATH Enolase 1, chloroplastic OS=Arabidopsis thaliana OX=3702 GN=ENO1 PE=1	245	YGQDACNVGDEGGFAPNVQDNR	NH2-YGQDAC<Cmm*>NVGDEGGFAPNVQDNR-COOH	22	53	37	NH2			245_YGQDACNVGDEGGFAPNVQDNR
A0A1P8B543	F4JLA9 (171-190)^AQ96318 (171-190)	A0A1P8B543_ARATH Cruciferin 3 OS=Arabidopsis thaliana OX=3702 GN=CRU3 PE=1	155	QGQQGQPWEGQGQQGQQGFR	NH2-Q<Pyr>GQQGQPWEGQGQQGQQGFR-COOH	20	45	40	NH2	Q<Pyr>		155_QGQQGQPWEGQGQQGQQGFR
Q9SL09		Q9SL09_ARATH Glycine-rich protein family OS=Arabidopsis thaliana OX=3702 GN=At2g05580 PE=4	67	GEEEEESKNNQGGIGR	But-GEEEEESK<But>NNQGGIGR-COOH	16	98	42	But			67_GEEEEESKNNQGGIGR	But
Q9SL09		Q9SL09_ARATH Glycine-rich protein family OS=Arabidopsis thaliana OX=3702 GN=At2g05580 PE=4	67	GEEEEESKNNQGGIGR	But-GEEEEESK<But>NNQGGIGR-COOH	16	96	41	But			67_GEEEEESKNNQGGIGR	But
Q9SL09		Q9SL09_ARATH Glycine-rich protein family OS=Arabidopsis thaliana OX=3702 GN=At2g05580 PE=4	67	GEEEEESKNNQGGIGR	But4C13-GEEEEESK<But4C13>NNQGGIGR-COOH	16	71	43	But4C13			67_GEEEEESKNNQGGIGR	But
A0A1P8B543	Q96318 (317-325)	A0A1P8B543_ARATH Cruciferin 3 OS=Arabidopsis thaliana OX=3702 GN=CRU3 PE=1	301	QPYESEEWR	NH2-QPYESEEWR-COOH	9	51	41	NH2			301_QPYESEEWR
A0A1P8B543	F4JLA9 (171-190)^AQ96318 (171-190)	A0A1P8B543_ARATH Cruciferin 3 OS=Arabidopsis thaliana OX=3702 GN=CRU3 PE=1	155	QGQQGQPWEGQGQQGQQGFR	NH2-QGQQGQPWEGQGQQGQQGFR-COOH	20	94	42	NH2			155_QGQQGQPWEGQGQQGQQGFR
A0A1P8B543	Q96318 (317-325)	A0A1P8B543_ARATH Cruciferin 3 OS=Arabidopsis thaliana OX=3702 GN=CRU3 PE=1	301	QPYESEEWR	NH2-Q<Pyr>PYESEEWR-COOH	9	57	39	NH2	Q<Pyr>		301_QPYESEEWR
A0A1P8B543	F4JLA9 (122-135)^AQ96318 (122-135)	A0A1P8B543_ARATH Cruciferin 3 OS=Arabidopsis thaliana OX=3702 GN=CRU3 PE=1	122	PMQGQQQGQPWQGR	But-PM<Mox*>QGQQQGQPWQGR-COOH	14	50	42	But			122_PMQGQQQGQPWQGR	But
F4K4D5	Q9C5Z1 (1-9)	F4K4D5_ARATH Eukaryotic translation initiation factor 3 subunit B OS=Arabidopsis thaliana OX=3702 GN=TIF3B1 PE=1	1	MEVVDIDAR	Ace-M<Mox*>EVVDIDAR-COOH	9	62	44	Ace		Ace	1_MEVVDIDAR
Q9C522	Q9FGX1 (2-9)	ACLB1_ARATH ATP-citrate synthase beta chain protein 1 OS=Arabidopsis thaliana OX=3702 GN=ACLB-1 PE=2	2	ATGQLFSR	Ace-ATGQLFSR-COOH	8	53	46	Ace		Ace	2_ATGQLFSR
F4JLA9	Q96318 (397-413)	F4JLA9_ARATH Cruciferin 3 OS=Arabidopsis thaliana OX=3702 GN=CRU3 PE=1	326	YNMNANEILYCTGGQGR	NH2-YNM<Mox*>NANEILYC<Cmm*>TGGQGR-COOH	17	84	40	NH2			326_YNMNANEILYCTGGQGR
A0A1P8B543	Q96318 (317-325)	A0A1P8B543_ARATH Cruciferin 3 OS=Arabidopsis thaliana OX=3702 GN=CRU3 PE=1	301	QPYESEEWR	NH2-QPYESEEWR-COOH	9	51	41	NH2			301_QPYESEEWR
F4K4D5	Q9C5Z1 (1-9)	F4K4D5_ARATH Eukaryotic translation initiation factor 3 subunit B OS=Arabidopsis thaliana OX=3702 GN=TIF3B1 PE=1	1	MEVVDIDAR	Ace-M<Mox*>EVVDIDAR-COOH	9	64	45	Ace		Ace	1_MEVVDIDAR
A0A1P8B543	Q96318 (317-325)	A0A1P8B543_ARATH Cruciferin 3 OS=Arabidopsis thaliana OX=3702 GN=CRU3 PE=1	301	QPYESEEWR	NH2-Q<Pyr>PYESEEWR-COOH	9	58	39	NH2	Q<Pyr>		301_QPYESEEWR
F4K4D5	Q9C5Z1 (1-9)	F4K4D5_ARATH Eukaryotic translation initiation factor 3 subunit B OS=Arabidopsis thaliana OX=3702 GN=TIF3B1 PE=1	1	MEVVDIDAR	Ace-M<Mox*>EVVDIDAR-COOH	9	65	44	Ace		Ace	1_MEVVDIDAR
Q9SIN3		Q9SIN3_ARATH Late embryogenesis abundant domain-containing protein / LEA domain-containing protein OS=Arabidopsis thaliana OX=3702 GN=At2g42560 PE=4	260	ASEYATEKGKEAGNMTAEQAAR	NH2-ASEYATEK<But4C13>GK<But4C13>EAGNM<Mox*>TAEQAAR-COOH	22	53	44	NH2			260_ASEYATEKGKEAGNMTAEQAAR
Q9SIN3		Q9SIN3_ARATH Late embryogenesis abundant domain-containing protein / LEA domain-containing protein OS=Arabidopsis thaliana OX=3702 GN=At2g42560 PE=4	240	ESVGEGAQKAGSATSEKAQR	NH2-ESVGEGAQK<But4C13>AGSATSEK<But4C13>AQR-COOH	20	47	45	NH2			240_ESVGEGAQKAGSATSEKAQR
Q9SIN3		Q9SIN3_ARATH Late embryogenesis abundant domain-containing protein / LEA domain-containing protein OS=Arabidopsis thaliana OX=3702 GN=At2g42560 PE=4	240	ESVGEGAQKAGSATSEKAQR	NH2-ESVGEGAQK<But4C13>AGSATSEK<But4C13>AQR-COOH	20	77	45	NH2			240_ESVGEGAQKAGSATSEKAQR
A0A1P8B543	Q96318 (317-325)	A0A1P8B543_ARATH Cruciferin 3 OS=Arabidopsis thaliana OX=3702 GN=CRU3 PE=1	301	QPYESEEWR	NH2-QPYESEEWR-COOH	9	51	41	NH2			301_QPYESEEWR
A0A1P8B543	Q96318 (317-325)	A0A1P8B543_ARATH Cruciferin 3 OS=Arabidopsis thaliana OX=3702 GN=CRU3 PE=1	301	QPYESEEWR	NH2-Q<Pyr>PYESEEWR-COOH	9	58	39	NH2	Q<Pyr>		301_QPYESEEWR
F4K4D5	Q9C5Z1 (1-9)	F4K4D5_ARATH Eukaryotic translation initiation factor 3 subunit B OS=Arabidopsis thaliana OX=3702 GN=TIF3B1 PE=1	1	MEVVDIDAR	Ace-M<Mox*>EVVDIDAR-COOH	9	63	44	Ace		Ace	1_MEVVDIDAR
O49326		JAL21_ARATH Nitrile-specifier protein 2 OS=Arabidopsis thaliana OX=3702 GN=NSP2 PE=2	41	FEYVNGSQEVVGDER	NH2-FEYVNGSQEVVGDER-COOH	15	56	42	NH2			41_FEYVNGSQEVVGDER
A0A1P8B543	Q96318 (317-325)	A0A1P8B543_ARATH Cruciferin 3 OS=Arabidopsis thaliana OX=3702 GN=CRU3 PE=1	301	QPYESEEWR	NH2-QPYESEEWR-COOH	9	51	41	NH2			301_QPYESEEWR
A0A1P8B543	Q96318 (317-325)	A0A1P8B543_ARATH Cruciferin 3 OS=Arabidopsis thaliana OX=3702 GN=CRU3 PE=1	301	QPYESEEWR	NH2-Q<Pyr>PYESEEWR-COOH	9	58	39	NH2	Q<Pyr>		301_QPYESEEWR
Q9FKA5		Y5957_ARATH Uncharacterized protein At5g39570 OS=Arabidopsis thaliana OX=3702 GN=At5g39570 PE=1	119	KPESEYGSGYGGQTEVEYGR	NH2-K<But4C13>PESEYGSGYGGQTEVEYGR-COOH	20	156	42	NH2			119_KPESEYGSGYGGQTEVEYGR
F4K4D5	Q9C5Z1 (1-9)	F4K4D5_ARATH Eukaryotic translation initiation factor 3 subunit B OS=Arabidopsis thaliana OX=3702 GN=TIF3B1 PE=1	1	MEVVDIDAR	Ace-M<Mox*>EVVDIDAR-COOH	9	63	44	Ace		Ace	1_MEVVDIDAR
Q9SIN3		Q9SIN3_ARATH Late embryogenesis abundant domain-containing protein / LEA domain-containing protein OS=Arabidopsis thaliana OX=3702 GN=At2g42560 PE=4	260	ASEYATEKGKEAGNMTAEQAAR	NH2-ASEYATEK<But4C13>GK<But4C13>EAGNM<Mox*>TAEQAAR-COOH	22	83	44	NH2			260_ASEYATEKGKEAGNMTAEQAAR
A0A2H1ZEH9	Q8H0X6 (39-57)	A0A2H1ZEH9_ARATH Cysteine proteinase inhibitor OS=Arabidopsis thaliana OX=3702 GN=CYSB PE=1	6	GVGDVPANQNSGEVESLAR	NH2-GVGDVPANQNSGEVESLAR-COOH	19	93	44	NH2			6_GVGDVPANQNSGEVESLAR
Q9SIN3		Q9SIN3_ARATH Late embryogenesis abundant domain-containing protein / LEA domain-containing protein OS=Arabidopsis thaliana OX=3702 GN=At2g42560 PE=4	59	SDKGSNMPVSDEGEGETKMKR	NH2-SDK<But4C13>GSNM<Mox*>PVSDEGEGETK<But4C13>M<Mox*>K<But4C13>R-COOH	21	72	43	NH2			59_SDKGSNMPVSDEGEGETKMKR
Q9SIN3		Q9SIN3_ARATH Late embryogenesis abundant domain-containing protein / LEA domain-containing protein OS=Arabidopsis thaliana OX=3702 GN=At2g42560 PE=4	260	ASEYATEKGKEAGNMTAEQAAR	NH2-ASEYATEK<But4C13>GK<But4C13>EAGNM<Mox*>TAEQAAR-COOH	22	57	44	NH2			260_ASEYATEKGKEAGNMTAEQAAR
Q9SIN3		Q9SIN3_ARATH Late embryogenesis abundant domain-containing protein / LEA domain-containing protein OS=Arabidopsis thaliana OX=3702 GN=At2g42560 PE=4	120	ANAQQKSMDSIKAAEER	NH2-ANAQQK<But4C13>SM<Mox*>DSIK<But4C13>AAEER-COOH	17	69	46	NH2			120_ANAQQKSMDSIKAAEER
Q9SIN3		Q9SIN3_ARATH Late embryogenesis abundant domain-containing protein / LEA domain-containing protein OS=Arabidopsis thaliana OX=3702 GN=At2g42560 PE=4	59	SDKGSNMPVSDEGEGETKMKR	NH2-SDK<But4C13>GSNM<Mox*>PVSDEGEGETK<But4C13>M<Mox*>K<But4C13>R-COOH	21	64	43	NH2			59_SDKGSNMPVSDEGEGETKMKR
Q9SIN3		Q9SIN3_ARATH Late embryogenesis abundant domain-containing protein / LEA domain-containing protein OS=Arabidopsis thaliana OX=3702 GN=At2g42560 PE=4	120	ANAQQKSMDSIKAAEER	NH2-ANAQQK<But4C13>SM<Mox*>DSIK<But4C13>AAEER-COOH	17	64	45	NH2			120_ANAQQKSMDSIKAAEER
Q9LYG3		MAOP2_ARATH NADP-dependent malic enzyme 2 OS=Arabidopsis thaliana OX=3702 GN=NADP-ME2 PE=1	2	GSTPTDLPGEDVADNR	Ace-GSTPTDLPGEDVADNR-COOH	16	49	43	Ace		Ace	2_GSTPTDLPGEDVADNR
Q9SIN3		Q9SIN3_ARATH Late embryogenesis abundant domain-containing protein / LEA domain-containing protein OS=Arabidopsis thaliana OX=3702 GN=At2g42560 PE=4	260	ASEYATEKGKEAGNMTAEQAAR	NH2-ASEYATEK<But4C13>GK<But4C13>EAGNM<Mox*>TAEQAAR-COOH	22	112	44	NH2			260_ASEYATEKGKEAGNMTAEQAAR
Q9SIN3		Q9SIN3_ARATH Late embryogenesis abundant domain-containing protein / LEA domain-containing protein OS=Arabidopsis thaliana OX=3702 GN=At2g42560 PE=4	260	ASEYATEKGKEAGNMTAEQAAR	NH2-ASEYATEK<But4C13>GK<But4C13>EAGNM<Mox*>TAEQAAR-COOH	22	67	44	NH2			260_ASEYATEKGKEAGNMTAEQAAR
A0A1P8B543	F4JLA9 (171-190)^AQ96318 (171-190)	A0A1P8B543_ARATH Cruciferin 3 OS=Arabidopsis thaliana OX=3702 GN=CRU3 PE=1	155	QGQQGQPWEGQGQQGQQGFR	NH2-QGQQGQPWEGQGQQGQQGFR-COOH	20	87	42	NH2			155_QGQQGQPWEGQGQQGQQGFR
F4J8V9	P0CJ46 (15-30)^AP0CJ47 (15-30)^AP53492 (15-30)^AP53494 (15-30)^AP53496 (15-30)^AP53497 (15-30)^AQ8RYC2 (16-31)^AQ96292 (15-30)^AQ96293 (15-30)	F4J8V9_ARATH Actin 2 OS=Arabidopsis thaliana OX=3702 GN=ACT2 PE=1	15	GTGMVKAGFAGDDAPR	NH2-GTGM<Mox*>VK<But4C13>AGFAGDDAPR-COOH	16	46	45	NH2			15_GTGMVKAGFAGDDAPR
A0A1P8B543	Q96318 (317-325)	A0A1P8B543_ARATH Cruciferin 3 OS=Arabidopsis thaliana OX=3702 GN=CRU3 PE=1	301	QPYESEEWR	NH2-QPYESEEWR-COOH	9	51	41	NH2			301_QPYESEEWR
Q9XFK7		MFT_ARATH Protein MOTHER of FT and TFL1 OS=Arabidopsis thaliana OX=3702 GN=MFT PE=1	125	QNSPVGLMVQQPPSR	NH2-Q<Pyr>NSPVGLM<Mox*>VQQPPSR-COOH	15	65	45	NH2	Q<Pyr>		125_QNSPVGLMVQQPPSR
A0A1P8B543	F4JLA9 (171-190)^AQ96318 (171-190)	A0A1P8B543_ARATH Cruciferin 3 OS=Arabidopsis thaliana OX=3702 GN=CRU3 PE=1	155	QGQQGQPWEGQGQQGQQGFR	NH2-Q<Pyr>GQQGQPWEGQGQQGQQGFR-COOH	20	69	40	NH2	Q<Pyr>		155_QGQQGQPWEGQGQQGQQGFR
Q9SIN3		Q9SIN3_ARATH Late embryogenesis abundant domain-containing protein / LEA domain-containing protein OS=Arabidopsis thaliana OX=3702 GN=At2g42560 PE=4	260	ASEYATEKGKEAGNMTAEQAAR	NH2-ASEYATEK<But>GK<But>EAGNM<Mox*>TAEQAAR-COOH	22	71	43	NH2			260_ASEYATEKGKEAGNMTAEQAAR
Q9SIN3		Q9SIN3_ARATH Late embryogenesis abundant domain-containing protein / LEA domain-containing protein OS=Arabidopsis thaliana OX=3702 GN=At2g42560 PE=4	260	ASEYATEKGKEAGNMTAEQAAR	NH2-ASEYATEK<But>GK<But>EAGNM<Mox*>TAEQAAR-COOH	22	94	43	NH2			260_ASEYATEKGKEAGNMTAEQAAR
A0A1P8B543	F4JLA9 (113-135)^AQ96318 (113-135)	A0A1P8B543_ARATH Cruciferin 3 OS=Arabidopsis thaliana OX=3702 GN=CRU3 PE=1	113	CAETFMDSQPMQGQQQGQPWQGR	NH2-C<Cmm*>AETFM<Mox*>DSQPM<Mox*>QGQQQGQPWQGR-COOH	23	50	35	NH2			113_CAETFMDSQPMQGQQQGQPWQGR
A0A1P8B543	F4JLA9 (113-135)^AQ96318 (113-135)	A0A1P8B543_ARATH Cruciferin 3 OS=Arabidopsis thaliana OX=3702 GN=CRU3 PE=1	113	CAETFMDSQPMQGQQQGQPWQGR	NH2-C<Cmm*>AETFM<Mox*>DSQPM<Mox*>QGQQQGQPWQGR-COOH	23	66	36	NH2			113_CAETFMDSQPMQGQQQGQPWQGR
Q9SIN3		Q9SIN3_ARATH Late embryogenesis abundant domain-containing protein / LEA domain-containing protein OS=Arabidopsis thaliana OX=3702 GN=At2g42560 PE=4	260	ASEYATEKGKEAGNMTAEQAAR	NH2-ASEYATEK<But>GK<But>EAGNM<Mox*>TAEQAAR-COOH	22	70	44	NH2			260_ASEYATEKGKEAGNMTAEQAAR
Q9SIN3		Q9SIN3_ARATH Late embryogenesis abundant domain-containing protein / LEA domain-containing protein OS=Arabidopsis thaliana OX=3702 GN=At2g42560 PE=4	260	ASEYATEKGKEAGNMTAEQAAR	NH2-ASEYATEK<But4C13>GK<But4C13>EAGNM<Mox*>TAEQAAR-COOH	22	63	44	NH2			260_ASEYATEKGKEAGNMTAEQAAR
A0A1P8B543	F4JLA9 (113-135)^AQ96318 (113-135)	A0A1P8B543_ARATH Cruciferin 3 OS=Arabidopsis thaliana OX=3702 GN=CRU3 PE=1	113	CAETFMDSQPMQGQQQGQPWQGR	NH2-C<Cmm*>AETFM<Mox*>DSQPM<Mox*>QGQQQGQPWQGR-COOH	23	66	36	NH2			113_CAETFMDSQPMQGQQQGQPWQGR
A8MRX2	F4JWM1 (2-15)^AQ42340 (2-15)^AQ9SK22 (2-15)	A8MRX2_ARATH Ribosomal protein S5 domain 2-like superfamily protein OS=Arabidopsis thaliana OX=3702 GN=At5g18380 PE=3	2	ATQPATESVQCFGR	Ace-ATQPATESVQC<Cmm*>FGR-COOH	14	68	43	Ace		Ace	2_ATQPATESVQCFGR
Q8L5U0		CSN4_ARATH COP9 signalosome complex subunit 4 OS=Arabidopsis thaliana OX=3702 GN=CSN4 PE=1	1	MDEALTNASAIGDQR	Ace-M<Mox*>DEALTNASAIGDQR-COOH	15	116	42	Ace		Ace	1_MDEALTNASAIGDQR
Q5XEP2		HSOP2_ARATH Hsp70-Hsp90 organizing protein 2 OS=Arabidopsis thaliana OX=3702 GN=HOP2 PE=1	370	ELEQQEYYDPNIGDEER	NH2-ELEQQEYYDPNIGDEER-COOH	17	90	39	NH2			370_ELEQQEYYDPNIGDEER
A0A1P8B543	F4JLA9 (171-190)^AQ96318 (171-190)	A0A1P8B543_ARATH Cruciferin 3 OS=Arabidopsis thaliana OX=3702 GN=CRU3 PE=1	155	QGQQGQPWEGQGQQGQQGFR	NH2-Q<Pyr>GQQGQPWEGQGQQGQQGFR-COOH	20	93	42	NH2	Q<Pyr>		155_QGQQGQPWEGQGQQGQQGFR
Q94BT0		SPSA1_ARATH Sucrose-phosphate synthase 1 OS=Arabidopsis thaliana OX=3702 GN=SPS1 PE=1	242	DSEDFSDEMGESSGAYIVR	NH2-DSEDFSDEM<Mox*>GESSGAYIVR-COOH	19	111	35	NH2			242_DSEDFSDEMGESSGAYIVR
P92985		RBP1C_ARATH Ran-binding protein 1 homolog c OS=Arabidopsis thaliana OX=3702 GN=RANBP1C PE=2	12	EDETEVNEDEDTGAQVAPIVR	NH2-EDETEVNEDEDTGAQVAPIVR-COOH	21	122	42	NH2			12_EDETEVNEDEDTGAQVAPIVR
Q94BT0		SPSA1_ARATH Sucrose-phosphate synthase 1 OS=Arabidopsis thaliana OX=3702 GN=SPS1 PE=1	242	DSEDFSDEMGESSGAYIVR	NH2-DSEDFSDEM<Mox*>GESSGAYIVR-COOH	19	92	34	NH2			242_DSEDFSDEMGESSGAYIVR
Q9XFK7		MFT_ARATH Protein MOTHER of FT and TFL1 OS=Arabidopsis thaliana OX=3702 GN=MFT PE=1	125	QNSPVGLMVQQPPSR	NH2-Q<Pyr>NSPVGLM<Mox*>VQQPPSR-COOH	15	57	45	NH2	Q<Pyr>		125_QNSPVGLMVQQPPSR
Q9SIN3		Q9SIN3_ARATH Late embryogenesis abundant domain-containing protein / LEA domain-containing protein OS=Arabidopsis thaliana OX=3702 GN=At2g42560 PE=4	260	ASEYATEKGKEAGNMTAEQAAR	NH2-ASEYATEK<But4C13>GK<But4C13>EAGNM<Mox*>TAEQAAR-COOH	22	54	44	NH2			260_ASEYATEKGKEAGNMTAEQAAR
Q9SIN3		Q9SIN3_ARATH Late embryogenesis abundant domain-containing protein / LEA domain-containing protein OS=Arabidopsis thaliana OX=3702 GN=At2g42560 PE=4	260	ASEYATEKGKEAGNMTAEQAAR	NH2-ASEYATEK<But4C13>GK<But4C13>EAGNM<Mox*>TAEQAAR-COOH	22	89	44	NH2			260_ASEYATEKGKEAGNMTAEQAAR
A0A1P8BB55	O24646 (1-20)	A0A1P8BB55_ARATH Basic-leucine zipper (BZIP) transcription factor family protein OS=Arabidopsis thaliana OX=3702 GN=HY5 PE=1	1	MQEQATSSLAASSLPSSSER	Ace-M<Mox*>QEQATSSLAASSLPSSSER-COOH	20	119	43	Ace		Ace	1_MQEQATSSLAASSLPSSSER
Q9SIN3		Q9SIN3_ARATH Late embryogenesis abundant domain-containing protein / LEA domain-containing protein OS=Arabidopsis thaliana OX=3702 GN=At2g42560 PE=4	260	ASEYATEKGKEAGNMTAEQAAR	NH2-ASEYATEK<But>GK<But>EAGNM<Mox*>TAEQAAR-COOH	22	76	43	NH2			260_ASEYATEKGKEAGNMTAEQAAR
Q9SIN3		Q9SIN3_ARATH Late embryogenesis abundant domain-containing protein / LEA domain-containing protein OS=Arabidopsis thaliana OX=3702 GN=At2g42560 PE=4	260	ASEYATEKGKEAGNMTAEQAAR	NH2-ASEYATEK<But>GK<But>EAGNM<Mox*>TAEQAAR-COOH	22	127	43	NH2			260_ASEYATEKGKEAGNMTAEQAAR
Q9SIN3		Q9SIN3_ARATH Late embryogenesis abundant domain-containing protein / LEA domain-containing protein OS=Arabidopsis thaliana OX=3702 GN=At2g42560 PE=4	260	ASEYATEKGKEAGNMTAEQAAR	NH2-ASEYATEK<But4C13>GK<But4C13>EAGNM<Mox*>TAEQAAR-COOH	22	87	44	NH2			260_ASEYATEKGKEAGNMTAEQAAR
Q9LUJ7		PAP85_ARATH Vicilin-like seed storage protein At3g22640 OS=Arabidopsis thaliana OX=3702 GN=PAP85 PE=2	31	EFEPPQQGEQEGPR	But4C13-EFEPPQQGEQEGPR-COOH	14	50	41	But4C13			31_EFEPPQQGEQEGPR	But
Q9SIN3		Q9SIN3_ARATH Late embryogenesis abundant domain-containing protein / LEA domain-containing protein OS=Arabidopsis thaliana OX=3702 GN=At2g42560 PE=4	260	ASEYATEKGKEAGNMTAEQAAR	NH2-ASEYATEK<But4C13>GK<But4C13>EAGNM<Mox*>TAEQAAR-COOH	22	97	44	NH2			260_ASEYATEKGKEAGNMTAEQAAR
Q9SIN3		Q9SIN3_ARATH Late embryogenesis abundant domain-containing protein / LEA domain-containing protein OS=Arabidopsis thaliana OX=3702 GN=At2g42560 PE=4	60	DKGSNMPVSDEGEGETKMKR	NH2-DK<But4C13>GSNM<Mox*>PVSDEGEGETK<But4C13>M<Mox*>K<But4C13>R-COOH	20	48	44	NH2			60_DKGSNMPVSDEGEGETKMKR
Q9LZC3		MASY_ARATH Malate synthase OS=Arabidopsis thaliana OX=3702 GN=MLS PE=1	1	MELETSVYR	Ace-M<Mox*>ELETSVYR-COOH	9	44	43	Ace		Ace	1_MELETSVYR
Q9SIN3		Q9SIN3_ARATH Late embryogenesis abundant domain-containing protein / LEA domain-containing protein OS=Arabidopsis thaliana OX=3702 GN=At2g42560 PE=4	60	DKGSNMPVSDEGEGETKMKR	NH2-DK<But4C13>GSNM<Mox*>PVSDEGEGETK<But4C13>M<Mox*>K<But4C13>R-COOH	20	64	44	NH2			60_DKGSNMPVSDEGEGETKMKR
F4KG52	Q04980 (415-429)	F4KG52_ARATH CAP160 protein OS=Arabidopsis thaliana OX=3702 GN=LTI65 PE=4	414	GGGQSESPVKDETPR	But4C13-GGGQSESPVK<But4C13>DETPR-COOH	15	59	45	But4C13			414_GGGQSESPVKDETPR	But
F4K4D5	Q9C5Z1 (1-9)	F4K4D5_ARATH Eukaryotic translation initiation factor 3 subunit B OS=Arabidopsis thaliana OX=3702 GN=TIF3B1 PE=1	1	MEVVDIDAR	Ace-M<Mox*>EVVDIDAR-COOH	9	78	44	Ace		Ace	1_MEVVDIDAR
O49453		Y4844_ARATH Uncharacterized protein At4g28440 OS=Arabidopsis thaliana OX=3702 GN=At4g28440 PE=1	2	ATTGTAAVATGTSTVKR	Ace-ATTGTAAVATGTSTVK<But4C13>R-COOH	17	48	45	Ace		Ace	2_ATTGTAAVATGTSTVKR
Q9LV21		TCPD_ARATH T-complex protein 1 subunit delta OS=Arabidopsis thaliana OX=3702 GN=CCT4 PE=1	2	AAVAAPMASKPR	Ace-AAVAAPM<Mox*>ASK<But4C13>PR-COOH	12	61	45	Ace		Ace	2_AAVAAPMASKPR
Q9SIN3		Q9SIN3_ARATH Late embryogenesis abundant domain-containing protein / LEA domain-containing protein OS=Arabidopsis thaliana OX=3702 GN=At2g42560 PE=4	260	ASEYATEKGKEAGNMTAEQAAR	NH2-ASEYATEK<But>GK<But>EAGNM<Mox*>TAEQAAR-COOH	22	49	43	NH2			260_ASEYATEKGKEAGNMTAEQAAR
A0A1P8B543	F4JLA9 (109-135)^AQ96318 (109-135)	A0A1P8B543_ARATH Cruciferin 3 OS=Arabidopsis thaliana OX=3702 GN=CRU3 PE=1	109	VVPGCAETFMDSQPMQGQQQGQPWQGR	NH2-VVPGC<Cmm*>AETFM<Mox*>DSQPM<Mox*>QGQQQGQPWQGR-COOH	27	51	38	NH2			109_VVPGCAETFMDSQPMQGQQQGQPWQGR
Q9SIN3		Q9SIN3_ARATH Late embryogenesis abundant domain-containing protein / LEA domain-containing protein OS=Arabidopsis thaliana OX=3702 GN=At2g42560 PE=4	260	ASEYATEKGKEAGNMTAEQAAR	NH2-ASEYATEK<But4C13>GK<But4C13>EAGNM<Mox*>TAEQAAR-COOH	22	63	44	NH2			260_ASEYATEKGKEAGNMTAEQAAR
Q9SIN3		Q9SIN3_ARATH Late embryogenesis abundant domain-containing protein / LEA domain-containing protein OS=Arabidopsis thaliana OX=3702 GN=At2g42560 PE=4	260	ASEYATEKGKEAGNMTAEQAAR	NH2-ASEYATEK<But4C13>GK<But4C13>EAGNM<Mox*>TAEQAAR-COOH	22	72	44	NH2			260_ASEYATEKGKEAGNMTAEQAAR
F4KG52	Q04980 (416-429)	F4KG52_ARATH CAP160 protein OS=Arabidopsis thaliana OX=3702 GN=LTI65 PE=4	415	GGQSESPVKDETPR	But4C13-GGQSESPVK<But4C13>DETPR-COOH	14	76	45	But4C13			415_GGQSESPVKDETPR	But
P15455		CRU1_ARATH 12S seed storage protein CRA1 OS=Arabidopsis thaliana OX=3702 GN=CRA1 PE=1	112	CAETFQDSSEFQPR	NH2-C<Cmm*>AETFQDSSEFQPR-COOH	14	65	40	NH2			112_CAETFQDSSEFQPR
A0A1P8B543	F4JLA9 (109-135)^AQ96318 (109-135)	A0A1P8B543_ARATH Cruciferin 3 OS=Arabidopsis thaliana OX=3702 GN=CRU3 PE=1	109	VVPGCAETFMDSQPMQGQQQGQPWQGR	NH2-VVPGC<Cmm*>AETFM<Mox*>DSQPM<Mox*>QGQQQGQPWQGR-COOH	27	51	38	NH2			109_VVPGCAETFMDSQPMQGQQQGQPWQGR
F4KG52	Q04980 (416-429)	F4KG52_ARATH CAP160 protein OS=Arabidopsis thaliana OX=3702 GN=LTI65 PE=4	415	GGQSESPVKDETPR	But4C13-GGQSESPVK<But4C13>DETPR-COOH	14	81	45	But4C13			415_GGQSESPVKDETPR	But
O49453		Y4844_ARATH Uncharacterized protein At4g28440 OS=Arabidopsis thaliana OX=3702 GN=At4g28440 PE=1	2	ATTGTAAVATGTSTVKR	Ace-ATTGTAAVATGTSTVK<But4C13>R-COOH	17	79	45	Ace		Ace	2_ATTGTAAVATGTSTVKR
Q9ZSZ8		FIP37_ARATH FKBP12-interacting protein of 37 kDa OS=Arabidopsis thaliana OX=3702 GN=FIP37 PE=1	1	MEFSSQDDDFGGDDSAANATR	Ace-M<Mox*>EFSSQDDDFGGDDSAANATR-COOH	21	122	27	Ace		Ace	1_MEFSSQDDDFGGDDSAANATR
Q9ZSZ8		FIP37_ARATH FKBP12-interacting protein of 37 kDa OS=Arabidopsis thaliana OX=3702 GN=FIP37 PE=1	1	MEFSSQDDDFGGDDSAANATR	Ace-M<Mox*>EFSSQDDDFGGDDSAANATR-COOH	21	163	29	Ace		Ace	1_MEFSSQDDDFGGDDSAANATR
F4KG52	Q04980 (417-429)	F4KG52_ARATH CAP160 protein OS=Arabidopsis thaliana OX=3702 GN=LTI65 PE=4	416	GQSESPVKDETPR	But4C13-GQSESPVK<But4C13>DETPR-COOH	13	82	45	But4C13			416_GQSESPVKDETPR	But
Q9S7S3		M17_ARATH Late embryogenesis abundant protein M17 OS=Arabidopsis thaliana OX=3702 GN=M17 PE=2	97	SQAEASEVVETVEPNDVEPQQGGR	NH2-SQAEASEVVETVEPNDVEPQQGGR-COOH	24	46	42	NH2			97_SQAEASEVVETVEPNDVEPQQGGR
A0A1P8B543	Q96318 (317-325)	A0A1P8B543_ARATH Cruciferin 3 OS=Arabidopsis thaliana OX=3702 GN=CRU3 PE=1	301	QPYESEEWR	NH2-QPYESEEWR-COOH	9	50	41	NH2			301_QPYESEEWR
P15456		CRU2_ARATH 12S seed storage protein CRB OS=Arabidopsis thaliana OX=3702 GN=CRB PE=1	399	AQVNTLAGR	But-AQVNTLAGR-COOH	9	64	45	But			399_AQVNTLAGR	But
P59230	P59231 (2-10)^AQ8VZB9 (2-10)	R10A2_ARATH 60S ribosomal protein L10a-2 OS=Arabidopsis thaliana OX=3702 GN=RPL10AB PE=1	2	SKLQSEAVR	Ace-SK<But4C13>LQSEAVR-COOH	9	61	45	Ace		Ace	2_SKLQSEAVR
Q9SIN3		Q9SIN3_ARATH Late embryogenesis abundant domain-containing protein / LEA domain-containing protein OS=Arabidopsis thaliana OX=3702 GN=At2g42560 PE=4	120	ANAQQKSMDSIKAAEER	NH2-ANAQQK<But>SM<Mox*>DSIK<But>AAEER-COOH	17	52	45	NH2			120_ANAQQKSMDSIKAAEER
F4JLA9	Q96318 (499-508)	F4JLA9_ARATH Cruciferin 3 OS=Arabidopsis thaliana OX=3702 GN=CRU3 PE=1	428	FNTLETTLTR	NH2-FNTLETTLTR-COOH	10	57	45	NH2			428_FNTLETTLTR
P59230	P59231 (2-10)^AQ8VZB9 (2-10)	R10A2_ARATH 60S ribosomal protein L10a-2 OS=Arabidopsis thaliana OX=3702 GN=RPL10AB PE=1	2	SKLQSEAVR	Ace-SK<But4C13>LQSEAVR-COOH	9	57	45	Ace		Ace	2_SKLQSEAVR
Q9C7F4		Q9C7F4_ARATH AT1G27990 protein OS=Arabidopsis thaliana OX=3702 GN=At1g27990 PE=2	2	SGVSLAVGPR	Ace-SGVSLAVGPR-COOH	10	55	44	Ace		Ace	2_SGVSLAVGPR
O49453		Y4844_ARATH Uncharacterized protein At4g28440 OS=Arabidopsis thaliana OX=3702 GN=At4g28440 PE=1	2	ATTGTAAVATGTSTVKR	Ace-ATTGTAAVATGTSTVK<But4C13>R-COOH	17	88	45	Ace		Ace	2_ATTGTAAVATGTSTVKR
O49453		Y4844_ARATH Uncharacterized protein At4g28440 OS=Arabidopsis thaliana OX=3702 GN=At4g28440 PE=1	2	ATTGTAAVATGTSTVKR	Ace-ATTGTAAVATGTSTVK<But4C13>R-COOH	17	145	45	Ace		Ace	2_ATTGTAAVATGTSTVKR
Q8L835	Q9LMS7 (1-8)	Q8L835_ARATH At1g18070 OS=Arabidopsis thaliana OX=3702 GN=At1g18070 PE=1	1	MDLEAEIR	Ace-M<Mox*>DLEAEIR-COOH	8	53	44	Ace		Ace	1_MDLEAEIR
A0A1P8B543	F4JLA9 (175-190)^AQ96318 (175-190)	A0A1P8B543_ARATH Cruciferin 3 OS=Arabidopsis thaliana OX=3702 GN=CRU3 PE=1	159	GQPWEGQGQQGQQGFR	But4C13-GQPWEGQGQQGQQGFR-COOH	16	72	42	But4C13			159_GQPWEGQGQQGQQGFR	But
Q9C7F4		Q9C7F4_ARATH AT1G27990 protein OS=Arabidopsis thaliana OX=3702 GN=At1g27990 PE=2	2	SGVSLAVGPR	Ace-SGVSLAVGPR-COOH	10	58	44	Ace		Ace	2_SGVSLAVGPR
Q9SIN3		Q9SIN3_ARATH Late embryogenesis abundant domain-containing protein / LEA domain-containing protein OS=Arabidopsis thaliana OX=3702 GN=At2g42560 PE=4	245	GAQKAGSATSEKAQR	But4C13-GAQK<But4C13>AGSATSEK<But4C13>AQR-COOH	15	93	45	But4C13			245_GAQKAGSATSEKAQR	But
Q9S7S3		M17_ARATH Late embryogenesis abundant protein M17 OS=Arabidopsis thaliana OX=3702 GN=M17 PE=2	97	SQAEASEVVETVEPNDVEPQQGGR	NH2-SQAEASEVVETVEPNDVEPQQGGR-COOH	24	106	43	NH2			97_SQAEASEVVETVEPNDVEPQQGGR
Q56WD9		THIK2_ARATH 3-ketoacyl-CoA thiolase 2, peroxisomal OS=Arabidopsis thaliana OX=3702 GN=PED1 PE=1	35	LAGDSAAYQR	But-LAGDSAAYQR-COOH	10	66	45	But			35_LAGDSAAYQR	But
A0A1P8B543	F4JLA9 (109-135)^AQ96318 (109-135)	A0A1P8B543_ARATH Cruciferin 3 OS=Arabidopsis thaliana OX=3702 GN=CRU3 PE=1	109	VVPGCAETFMDSQPMQGQQQGQPWQGR	NH2-VVPGC<Cmm*>AETFM<Mox*>DSQPM<Mox*>QGQQQGQPWQGR-COOH	27	41	38	NH2			109_VVPGCAETFMDSQPMQGQQQGQPWQGR
Q9S7S3		M17_ARATH Late embryogenesis abundant protein M17 OS=Arabidopsis thaliana OX=3702 GN=M17 PE=2	97	SQAEASEVVETVEPNDVEPQQGGR	NH2-SQAEASEVVETVEPNDVEPQQGGR-COOH	24	116	43	NH2			97_SQAEASEVVETVEPNDVEPQQGGR
Q9S7S3		M17_ARATH Late embryogenesis abundant protein M17 OS=Arabidopsis thaliana OX=3702 GN=M17 PE=2	97	SQAEASEVVETVEPNDVEPQQGGR	NH2-SQAEASEVVETVEPNDVEPQQGGR-COOH	24	78	43	NH2			97_SQAEASEVVETVEPNDVEPQQGGR
Q42431		OLEO4_ARATH Oleosin 20.3 kDa OS=Arabidopsis thaliana OX=3702 GN=OL2 PE=2	35	GYGAGSDYKSR	But4C13-GYGAGSDYK<But4C13>SR-COOH	11	65	44	But4C13			35_GYGAGSDYKSR	But
A0A1P8B543	F4JLA9 (109-135)^AQ96318 (109-135)	A0A1P8B543_ARATH Cruciferin 3 OS=Arabidopsis thaliana OX=3702 GN=CRU3 PE=1	109	VVPGCAETFMDSQPMQGQQQGQPWQGR	NH2-VVPGC<Cmm*>AETFM<Mox*>DSQPM<Mox*>QGQQQGQPWQGR-COOH	27	49	38	NH2			109_VVPGCAETFMDSQPMQGQQQGQPWQGR
Q9LZC3		MASY_ARATH Malate synthase OS=Arabidopsis thaliana OX=3702 GN=MLS PE=1	1	MELETSVYRPN	Ace-M<Mox*>ELETSVYRPN-COOH	11	65	44	Ace		Ace	1_MELETSVYRPN
Q42431		OLEO4_ARATH Oleosin 20.3 kDa OS=Arabidopsis thaliana OX=3702 GN=OL2 PE=2	35	GYGAGSDYKSR	But-GYGAGSDYK<But>SR-COOH	11	72	43	But			35_GYGAGSDYKSR	But
Q9M1X0		RRFC_ARATH Ribosome-recycling factor, chloroplastic OS=Arabidopsis thaliana OX=3702 GN=RRF PE=2	210	QSEEGKVALR	NH2-Q<Pyr>SEEGK<But4C13>VALR-COOH	10	47	46	NH2	Q<Pyr>		210_QSEEGKVALR
A0A1P8B543	F4JLA9 (97-135)^AQ96318 (97-135)	A0A1P8B543_ARATH Cruciferin 3 OS=Arabidopsis thaliana OX=3702 GN=CRU3 PE=1	97	SYVVQGTGISGRVVPGCAETFMDSQPMQGQQQGQPWQGR	NH2-SYVVQGTGISGRVVPGC<Cmm*>AETFM<Mox*>DSQPM<Mox*>QGQQQGQPWQGR-COOH	39	41	40	NH2			97_SYVVQGTGISGRVVPGCAETFMDSQPMQGQQQGQPWQGR
Q8L835	Q9LMS7 (1-8)	Q8L835_ARATH At1g18070 OS=Arabidopsis thaliana OX=3702 GN=At1g18070 PE=1	1	MDLEAEIR	Ace-M<Mox*>DLEAEIR-COOH	8	70	44	Ace		Ace	1_MDLEAEIR
A0A1P8B543	F4JLA9 (176-190)^AQ96318 (176-190)	A0A1P8B543_ARATH Cruciferin 3 OS=Arabidopsis thaliana OX=3702 GN=CRU3 PE=1	160	QPWEGQGQQGQQGFR	NH2-QPWEGQGQQGQQGFR-COOH	15	84	43	NH2			160_QPWEGQGQQGQQGFR
Q9SKP0	A0A1P8B189 (338-357)	ECP63_ARATH Late embryogenesis abundant protein ECP63 OS=Arabidopsis thaliana OX=3702 GN=ECP63 PE=2	338	ESTESGAQKAEETKDSAAVR	NH2-ESTESGAQK<But4C13>AEETK<But4C13>DSAAVR-COOH	20	100	45	NH2			338_ESTESGAQKAEETKDSAAVR
Q9SKP0	A0A1P8B189 (338-357)	ECP63_ARATH Late embryogenesis abundant protein ECP63 OS=Arabidopsis thaliana OX=3702 GN=ECP63 PE=2	338	ESTESGAQKAEETKDSAAVR	NH2-ESTESGAQK<But4C13>AEETK<But4C13>DSAAVR-COOH	20	89	45	NH2			338_ESTESGAQKAEETKDSAAVR
Q9SKP0	A0A1P8B189 (338-357)	ECP63_ARATH Late embryogenesis abundant protein ECP63 OS=Arabidopsis thaliana OX=3702 GN=ECP63 PE=2	338	ESTESGAQKAEETKDSAAVR	NH2-ESTESGAQK<But4C13>AEETK<But4C13>DSAAVR-COOH	20	127	45	NH2			338_ESTESGAQKAEETKDSAAVR
A0A1P8B543	F4JLA9 (176-190)^AQ96318 (176-190)	A0A1P8B543_ARATH Cruciferin 3 OS=Arabidopsis thaliana OX=3702 GN=CRU3 PE=1	160	QPWEGQGQQGQQGFR	NH2-Q<Pyr>PWEGQGQQGQQGFR-COOH	15	90	43	NH2	Q<Pyr>		160_QPWEGQGQQGQQGFR
A0A1P8B543	F4JLA9 (173-190)^AQ96318 (173-190)	A0A1P8B543_ARATH Cruciferin 3 OS=Arabidopsis thaliana OX=3702 GN=CRU3 PE=1	157	QQGQPWEGQGQQGQQGFR	But-QQGQPWEGQGQQGQQGFR-COOH	18	74	42	But			157_QQGQPWEGQGQQGQQGFR	But
Q42431		OLEO4_ARATH Oleosin 20.3 kDa OS=Arabidopsis thaliana OX=3702 GN=OL2 PE=2	35	GYGAGSDYKSR	But4C13-GYGAGSDYK<But4C13>SR-COOH	11	61	45	But4C13			35_GYGAGSDYKSR	But
Q9SKP0	A0A1P8B189 (338-357)	ECP63_ARATH Late embryogenesis abundant protein ECP63 OS=Arabidopsis thaliana OX=3702 GN=ECP63 PE=2	338	ESTESGAQKAEETKDSAAVR	NH2-ESTESGAQK<But4C13>AEETK<But4C13>DSAAVR-COOH	20	76	45	NH2			338_ESTESGAQKAEETKDSAAVR
A0A1P8B543	F4JLA9 (172-190)^AQ96318 (172-190)	A0A1P8B543_ARATH Cruciferin 3 OS=Arabidopsis thaliana OX=3702 GN=CRU3 PE=1	156	GQQGQPWEGQGQQGQQGFR	But-GQQGQPWEGQGQQGQQGFR-COOH	19	93	42	But			156_GQQGQPWEGQGQQGQQGFR	But
A0A1P8B543	F4JLA9 (173-190)^AQ96318 (173-190)	A0A1P8B543_ARATH Cruciferin 3 OS=Arabidopsis thaliana OX=3702 GN=CRU3 PE=1	157	QQGQPWEGQGQQGQQGFR	But-QQGQPWEGQGQQGQQGFR-COOH	18	48	41	But			157_QQGQPWEGQGQQGQQGFR	But
A0A1P8B543	F4JLA9 (109-135)^AQ96318 (109-135)	A0A1P8B543_ARATH Cruciferin 3 OS=Arabidopsis thaliana OX=3702 GN=CRU3 PE=1	109	VVPGCAETFMDSQPMQGQQQGQPWQGR	NH2-VVPGC<Cmm*>AETFM<Mox*>DSQPM<Mox*>QGQQQGQPWQGR-COOH	27	41	38	NH2			109_VVPGCAETFMDSQPMQGQQQGQPWQGR
Q9SKP0	A0A1P8B189 (338-357)	ECP63_ARATH Late embryogenesis abundant protein ECP63 OS=Arabidopsis thaliana OX=3702 GN=ECP63 PE=2	338	ESTESGAQKAEETKDSAAVR	NH2-ESTESGAQK<But4C13>AEETK<But4C13>DSAAVR-COOH	20	105	45	NH2			338_ESTESGAQKAEETKDSAAVR
A0A1P8B543	F4JLA9 (172-190)^AQ96318 (172-190)	A0A1P8B543_ARATH Cruciferin 3 OS=Arabidopsis thaliana OX=3702 GN=CRU3 PE=1	156	GQQGQPWEGQGQQGQQGFR	But4C13-GQQGQPWEGQGQQGQQGFR-COOH	19	84	42	But4C13			156_GQQGQPWEGQGQQGQQGFR	But
Q9SZE4		VP322_ARATH Vacuolar protein sorting-associated protein 32 homolog 2 OS=Arabidopsis thaliana OX=3702 GN=VPS32.2 PE=1	204	TAEEEELAALQ	NH2-TAEEEELAALQ-COOH	11	49	44	NH2			204_TAEEEELAALQ
Q9SKP0	A0A1P8B189 (338-357)	ECP63_ARATH Late embryogenesis abundant protein ECP63 OS=Arabidopsis thaliana OX=3702 GN=ECP63 PE=2	338	ESTESGAQKAEETKDSAAVR	NH2-ESTESGAQK<But4C13>AEETK<But4C13>DSAAVR-COOH	20	78	45	NH2			338_ESTESGAQKAEETKDSAAVR
A0A1P8B543	F4JLA9 (109-135)^AQ96318 (109-135)	A0A1P8B543_ARATH Cruciferin 3 OS=Arabidopsis thaliana OX=3702 GN=CRU3 PE=1	109	VVPGCAETFMDSQPMQGQQQGQPWQGR	NH2-VVPGC<Cmm*>AETFM<Mox*>DSQPM<Mox*>QGQQQGQPWQGR-COOH	27	46	38	NH2			109_VVPGCAETFMDSQPMQGQQQGQPWQGR
P15455		CRU1_ARATH 12S seed storage protein CRA1 OS=Arabidopsis thaliana OX=3702 GN=CRA1 PE=1	112	CAETFQDSSEFQPR	NH2-C<Cmm*>AETFQDSSEFQPR-COOH	14	77	40	NH2			112_CAETFQDSSEFQPR
P15455		CRU1_ARATH 12S seed storage protein CRA1 OS=Arabidopsis thaliana OX=3702 GN=CRA1 PE=1	112	CAETFQDSSEFQPR	NH2-C<Cmm*>AETFQDSSEFQPR-COOH	14	82	40	NH2			112_CAETFQDSSEFQPR
A0A1P8B543	F4JLA9 (176-190)^AQ96318 (176-190)	A0A1P8B543_ARATH Cruciferin 3 OS=Arabidopsis thaliana OX=3702 GN=CRU3 PE=1	160	QPWEGQGQQGQQGFR	NH2-QPWEGQGQQGQQGFR-COOH	15	111	43	NH2			160_QPWEGQGQQGQQGFR
Q9SIN3		Q9SIN3_ARATH Late embryogenesis abundant domain-containing protein / LEA domain-containing protein OS=Arabidopsis thaliana OX=3702 GN=At2g42560 PE=4	245	GAQKAGSATSEKAQR	But-GAQK<But>AGSATSEK<But>AQR-COOH	15	93	46	But			245_GAQKAGSATSEKAQR	But
A0A1P8B543	F4JLA9 (176-190)^AQ96318 (176-190)	A0A1P8B543_ARATH Cruciferin 3 OS=Arabidopsis thaliana OX=3702 GN=CRU3 PE=1	160	QPWEGQGQQGQQGFR	NH2-Q<Pyr>PWEGQGQQGQQGFR-COOH	15	97	42	NH2	Q<Pyr>		160_QPWEGQGQQGQQGFR
A0A1P8B543	F4JLA9 (176-190)^AQ96318 (176-190)	A0A1P8B543_ARATH Cruciferin 3 OS=Arabidopsis thaliana OX=3702 GN=CRU3 PE=1	160	QPWEGQGQQGQQGFR	NH2-QPWEGQGQQGQQGFR-COOH	15	85	43	NH2			160_QPWEGQGQQGQQGFR
Q9SIN3		Q9SIN3_ARATH Late embryogenesis abundant domain-containing protein / LEA domain-containing protein OS=Arabidopsis thaliana OX=3702 GN=At2g42560 PE=4	245	GAQKAGSATSEKAQR	But-GAQK<But>AGSATSEK<But>AQR-COOH	15	93	45	But			245_GAQKAGSATSEKAQR	But
Q9SEL6		VTI11_ARATH Vesicle transport v-SNARE 11 OS=Arabidopsis thaliana OX=3702 GN=VTI11 PE=1	2	SDVFDGYER	Ace-SDVFDGYER-COOH	9	60	40	Ace		Ace	2_SDVFDGYER
A0A1P8B543	F4JLA9 (176-190)^AQ96318 (176-190)	A0A1P8B543_ARATH Cruciferin 3 OS=Arabidopsis thaliana OX=3702 GN=CRU3 PE=1	160	QPWEGQGQQGQQGFR	NH2-Q<Pyr>PWEGQGQQGQQGFR-COOH	15	69	42	NH2	Q<Pyr>		160_QPWEGQGQQGQQGFR
Q9SVM8		RBG2_ARATH Glycine-rich RNA-binding protein 2, mitochondrial OS=Arabidopsis thaliana OX=3702 GN=RBG2 PE=1	120	AYGGGGGYSGGGGGYGGGGGGYGGGGGGYGGGGDGGGGF	NH2-AYGGGGGYSGGGGGYGGGGGGYGGGGGGYGGGGDGGGGF-COOH	39	84	27	NH2			120_AYGGGGGYSGGGGGYGGGGGGYGGGGGGYGGGGDGGGGF
A0A1P8B543	F4JLA9 (109-135)^AQ96318 (109-135)	A0A1P8B543_ARATH Cruciferin 3 OS=Arabidopsis thaliana OX=3702 GN=CRU3 PE=1	109	VVPGCAETFMDSQPMQGQQQGQPWQGR	NH2-VVPGC<Cmm*>AETFM<Mox*>DSQPM<Mox*>QGQQQGQPWQGR-COOH	27	46	38	NH2			109_VVPGCAETFMDSQPMQGQQQGQPWQGR
F4I354	Q9FXG0 (21-43)	F4I354_ARATH Double-stranded DNA-binding family protein OS=Arabidopsis thaliana OX=3702 GN=At1g29850 PE=1	8	QGMGKQGNQQNPEQEKQQEDAKR	NH2-Q<Pyr>GM<Mox*>GK<But>QGNQQNPEQEK<But>QQEDAK<But>R-COOH	23	44	43	NH2	Q<Pyr>		8_QGMGKQGNQQNPEQEKQQEDAKR
F4I354	Q9FXG0 (21-43)	F4I354_ARATH Double-stranded DNA-binding family protein OS=Arabidopsis thaliana OX=3702 GN=At1g29850 PE=1	8	QGMGKQGNQQNPEQEKQQEDAKR	NH2-Q<Pyr>GM<Mox*>GK<But4C13>QGNQQNPEQEK<But4C13>QQEDAK<But4C13>R-COOH	23	80	44	NH2	Q<Pyr>		8_QGMGKQGNQQNPEQEKQQEDAKR
F4I354	Q9FXG0 (21-43)	F4I354_ARATH Double-stranded DNA-binding family protein OS=Arabidopsis thaliana OX=3702 GN=At1g29850 PE=1	8	QGMGKQGNQQNPEQEKQQEDAKR	NH2-Q<Pyr>GM<Mox*>GK<But>QGNQQNPEQEK<But>QQEDAK<But>R-COOH	23	55	43	NH2	Q<Pyr>		8_QGMGKQGNQQNPEQEKQQEDAKR
O49453		Y4844_ARATH Uncharacterized protein At4g28440 OS=Arabidopsis thaliana OX=3702 GN=At4g28440 PE=1	2	ATTGTAAVATGTSTVKR	Ace-ATTGTAAVATGTSTVK<But4C13>R-COOH	17	114	45	Ace		Ace	2_ATTGTAAVATGTSTVKR
F4J6Z1	Q9SVD7 (2-14)	F4J6Z1_ARATH Ubiquitin E2 variant 1D-4 OS=Arabidopsis thaliana OX=3702 GN=UEV1D-4 PE=1	2	TLGSGGSSVVVPR	Ace-TLGSGGSSVVVPR-COOH	13	137	45	Ace		Ace	2_TLGSGGSSVVVPR
Q39165		OLEO2_ARATH Oleosin 21.2 kDa OS=Arabidopsis thaliana OX=3702 GN=At5g40420 PE=2	149	MADAVGYAGQKGKEMGQ	NH2-M<Mox*>ADAVGYAGQK<But4C13>GK<But4C13>EM<Mox*>GQ-COOH	17	47	44	NH2			149_MADAVGYAGQKGKEMGQ
Q9SIN3		Q9SIN3_ARATH Late embryogenesis abundant domain-containing protein / LEA domain-containing protein OS=Arabidopsis thaliana OX=3702 GN=At2g42560 PE=4	245	GAQKAGSATSEKAQR	But-GAQK<But>AGSATSEK<But>AQR-COOH	15	94	46	But			245_GAQKAGSATSEKAQR	But
Q39165		OLEO2_ARATH Oleosin 21.2 kDa OS=Arabidopsis thaliana OX=3702 GN=At5g40420 PE=2	149	MADAVGYAGQKGKEMGQ	NH2-M<Mox*>ADAVGYAGQK<But4C13>GK<But4C13>EM<Mox*>GQ-COOH	17	52	44	NH2			149_MADAVGYAGQKGKEMGQ
Q9SIN3		Q9SIN3_ARATH Late embryogenesis abundant domain-containing protein / LEA domain-containing protein OS=Arabidopsis thaliana OX=3702 GN=At2g42560 PE=4	245	GAQKAGSATSEKAQR	But4C13-GAQK<But4C13>AGSATSEK<But4C13>AQR-COOH	15	74	45	But4C13			245_GAQKAGSATSEKAQR	But
Q9SIN3		Q9SIN3_ARATH Late embryogenesis abundant domain-containing protein / LEA domain-containing protein OS=Arabidopsis thaliana OX=3702 GN=At2g42560 PE=4	245	GAQKAGSATSEKAQR	But-GAQK<But>AGSATSEK<But>AQR-COOH	15	82	46	But			245_GAQKAGSATSEKAQR	But
Q39165		OLEO2_ARATH Oleosin 21.2 kDa OS=Arabidopsis thaliana OX=3702 GN=At5g40420 PE=2	149	MADAVGYAGQKGKEMGQ	NH2-M<Mox*>ADAVGYAGQK<But>GK<But>EM<Mox*>GQ-COOH	17	44	43	NH2			149_MADAVGYAGQKGKEMGQ
P46645		AAT2_ARATH Aspartate aminotransferase, cytoplasmic isozyme 1 OS=Arabidopsis thaliana OX=3702 GN=ASP2 PE=1	1	MDSVFSNVAR	Ace-M<Mox*>DSVFSNVAR-COOH	10	66	43	Ace		Ace	1_MDSVFSNVAR
Q9S7S3		M17_ARATH Late embryogenesis abundant protein M17 OS=Arabidopsis thaliana OX=3702 GN=M17 PE=2	262	SQAEANEVVETVEAQ	NH2-SQAEANEVVETVEAQ-COOH	15	53	43	NH2			262_SQAEANEVVETVEAQ
A0A1P8ANI1	Q8LEK2 (1-18)	A0A1P8ANI1_ARATH Golgi apparatus membrane protein TVP23 OS=Arabidopsis thaliana OX=3702 GN=ECH PE=1	1	MDPNNQIQAPVENYANPR	Ace-M<Mox*>DPNNQIQAPVENYANPR-COOH	18	58	41	Ace		Ace	1_MDPNNQIQAPVENYANPR
Q9FE58		RL223_ARATH 60S ribosomal protein L22-3 OS=Arabidopsis thaliana OX=3702 GN=RPL22C PE=2	112	YFNIAENEAEEED	NH2-YFNIAENEAEEED-COOH	13	41	36	NH2			112_YFNIAENEAEEED
A0A1P8ANI1	Q8LEK2 (1-18)	A0A1P8ANI1_ARATH Golgi apparatus membrane protein TVP23 OS=Arabidopsis thaliana OX=3702 GN=ECH PE=1	1	MDPNNQIQAPVENYANPR	Ace-M<Mox*>DPNNQIQAPVENYANPR-COOH	18	93	42	Ace		Ace	1_MDPNNQIQAPVENYANPR
O49453		Y4844_ARATH Uncharacterized protein At4g28440 OS=Arabidopsis thaliana OX=3702 GN=At4g28440 PE=1	2	ATTGTAAVATGTSTVKR	Ace-ATTGTAAVATGTSTVK<But4C13>R-COOH	17	116	45	Ace		Ace	2_ATTGTAAVATGTSTVKR
A0A1P8AZN6	O82326 (44-60)	A0A1P8AZN6_ARATH SWIB/MDM2 domain superfamily protein OS=Arabidopsis thaliana OX=3702 GN=At2g14880 PE=1	44	AVTSATESSEPTATNKR	But-AVTSATESSEPTATNK<But>R-COOH	17	147	45	But			44_AVTSATESSEPTATNKR	But
A0A1P8AZN6	O82326 (44-60)	A0A1P8AZN6_ARATH SWIB/MDM2 domain superfamily protein OS=Arabidopsis thaliana OX=3702 GN=At2g14880 PE=1	44	AVTSATESSEPTATNKR	But-AVTSATESSEPTATNK<But>R-COOH	17	79	45	But			44_AVTSATESSEPTATNKR	But
Q9SSW2		AZF2_ARATH Zinc finger protein AZF2 OS=Arabidopsis thaliana OX=3702 GN=AZF2 PE=2	2	ALEAMNTPTSSFTR	Ace-ALEAM<Mox*>NTPTSSFTR-COOH	14	57	44	Ace		Ace	2_ALEAMNTPTSSFTR
P46645		AAT2_ARATH Aspartate aminotransferase, cytoplasmic isozyme 1 OS=Arabidopsis thaliana OX=3702 GN=ASP2 PE=1	1	MDSVFSNVAR	Ace-M<Mox*>DSVFSNVAR-COOH	10	45	43	Ace		Ace	1_MDSVFSNVAR
F4KFK7	Q6AWX0 (2-16)	F4KFK7_ARATH Major facilitator superfamily protein OS=Arabidopsis thaliana OX=3702 GN=At5g17010 PE=1	2	ALDPEQQQPISSVSR	Ace-ALDPEQQQPISSVSR-COOH	15	47	45	Ace		Ace	2_ALDPEQQQPISSVSR
P34788		RS18_ARATH 40S ribosomal protein S18 OS=Arabidopsis thaliana OX=3702 GN=RPS18A PE=1	2	SLVANEEFQH	Ace-SLVANEEFQH-COOH	10	46	43	Ace		Ace	2_SLVANEEFQH
F4KFK7	Q6AWX0 (2-16)	F4KFK7_ARATH Major facilitator superfamily protein OS=Arabidopsis thaliana OX=3702 GN=At5g17010 PE=1	2	ALDPEQQQPISSVSR	Ace-ALDPEQQQPISSVSR-COOH	15	80	45	Ace		Ace	2_ALDPEQQQPISSVSR
Q9FE58		RL223_ARATH 60S ribosomal protein L22-3 OS=Arabidopsis thaliana OX=3702 GN=RPL22C PE=2	112	YFNIAENEAEEED	NH2-YFNIAENEAEEED-COOH	13	52	37	NH2			112_YFNIAENEAEEED
Q39165		OLEO2_ARATH Oleosin 21.2 kDa OS=Arabidopsis thaliana OX=3702 GN=At5g40420 PE=2	149	MADAVGYAGQKGKEM	NH2-M<Mox*>ADAVGYAGQK<But4C13>GK<But4C13>EM<Mox*>-COOH	15	56	44	NH2			149_MADAVGYAGQKGKEM
A0A1P8B297	Q9SLN5 (2-17)	A0A1P8B297_ARATH Methionine aminopeptidase OS=Arabidopsis thaliana OX=3702 GN=MAP1A PE=1	2	ASESDASSIATLSCAR	Ace-ASESDASSIATLSC<Cmm*>AR-COOH	16	78	42	Ace		Ace	2_ASESDASSIATLSCAR
F4J109	F4J110 (2-9)^AQ8L611 (2-9)	F4J109_ARATH Transducin family protein / WD-40 repeat family protein OS=Arabidopsis thaliana OX=3702 GN=SEC31B PE=1	2	ACIKGVGR	Ace-AC<Cmm*>IK<But>GVGR-COOH	8	47	45	Ace		Ace	2_ACIKGVGR
A0A1P8B543	F4JLA9 (172-190)^AQ96318 (172-190)	A0A1P8B543_ARATH Cruciferin 3 OS=Arabidopsis thaliana OX=3702 GN=CRU3 PE=1	156	GQQGQPWEGQGQQGQQGFR	But-GQQGQPWEGQGQQGQQGFR-COOH	19	60	41	But			156_GQQGQPWEGQGQQGQQGFR	But
Q42344		HMGB4_ARATH High mobility group B protein 4 OS=Arabidopsis thaliana OX=3702 GN=HMGB4 PE=1	1	MKGGESKAEATSTDQR	But4C13-M<Mox*>K<But4C13>GGESK<But4C13>AEATSTDQR-COOH	16	99	45	But4C13			1_MKGGESKAEATSTDQR	But
A0A1P8B543	Q96318 (283-298)	A0A1P8B543_ARATH Cruciferin 3 OS=Arabidopsis thaliana OX=3702 GN=CRU3 PE=1	267	IDVQLAQQLQNQQDSR	NH2-IDVQLAQQLQNQQDSR-COOH	16	100	46	NH2			267_IDVQLAQQLQNQQDSR
Q9M339		RS32_ARATH 40S ribosomal protein S3-2 OS=Arabidopsis thaliana OX=3702 GN=RPS3B PE=1	2	TTQISKKR	Ace-TTQISK<But>K<But>R-COOH	8	54	43	Ace		Ace	2_TTQISKKR
Q9LUJ7		PAP85_ARATH Vicilin-like seed storage protein At3g22640 OS=Arabidopsis thaliana OX=3702 GN=PAP85 PE=2	31	EFEPPQQGEQEGPR	But4C13-EFEPPQQGEQEGPR-COOH	14	77	43	But4C13			31_EFEPPQQGEQEGPR	But
Q02973		EM6_ARATH Em-like protein GEA6 OS=Arabidopsis thaliana OX=3702 GN=EM6 PE=2	2	ASQQEKKQLDER	Ace-ASQQEK<But>K<But>QLDER-COOH	12	78	45	Ace		Ace	2_ASQQEKKQLDER
F4I355	Q9FXG0 (2-10)	F4I355_ARATH Double-stranded DNA-binding family protein OS=Arabidopsis thaliana OX=3702 GN=At1g29850 PE=1	2	ADPELEAIR	Ace-ADPELEAIR-COOH	9	59	44	Ace		Ace	2_ADPELEAIR
Q02973		EM6_ARATH Em-like protein GEA6 OS=Arabidopsis thaliana OX=3702 GN=EM6 PE=2	2	ASQQEKKQLDER	Ace-ASQQEK<But4C13>K<But4C13>QLDER-COOH	12	84	46	Ace		Ace	2_ASQQEKKQLDER
A0A1I9LMY7	Q8LC83 (2-9)^AQ9SS17 (2-9)	A0A1I9LMY7_ARATH 40S ribosomal protein S24 OS=Arabidopsis thaliana OX=3702 GN=At3g04920 PE=3	2	AEKAVTIR	Ace-AEK<But4C13>AVTIR-COOH	8	53	43	Ace		Ace	2_AEKAVTIR
P15456		CRU2_ARATH 12S seed storage protein CRB OS=Arabidopsis thaliana OX=3702 GN=CRB PE=1	223	INVETAQQLQNQQDNR	NH2-INVETAQQLQNQQDNR-COOH	16	73	45	NH2			223_INVETAQQLQNQQDNR
O49596		HMGB2_ARATH High mobility group B protein 2 OS=Arabidopsis thaliana OX=3702 GN=HMGB2 PE=1	1	MKGAKSKTETR	Ace-M<Mox*>K<But4C13>GAK<But4C13>SK<But4C13>TETR-COOH	11	87	45	Ace		Ace	1_MKGAKSKTETR
Q9SK09		VCL22_ARATH Vicilin-like seed storage protein At2g28490 OS=Arabidopsis thaliana OX=3702 GN=At2g28490 PE=2	247	GPIVYVTEGPQPQ	NH2-GPIVYVTEGPQPQ-COOH	13	54	45	NH2			247_GPIVYVTEGPQPQ
Q9LPZ1		MORF9_ARATH Multiple organellar RNA editing factor 9, chloroplastic OS=Arabidopsis thaliana OX=3702 GN=MORF9 PE=1	60	ATVDSDYSSKR	But-ATVDSDYSSK<But>R-COOH	11	66	44	But			60_ATVDSDYSSKR	But
F4J573		F4J573_ARATH Late embryogenesis abundant protein (LEA) family protein OS=Arabidopsis thaliana OX=3702 GN=At3g17520 PE=4	64	TVQDDAWR	But-TVQDDAWR-COOH	8	48	43	But			64_TVQDDAWR	But
Q9LUJ7		PAP85_ARATH Vicilin-like seed storage protein At3g22640 OS=Arabidopsis thaliana OX=3702 GN=PAP85 PE=2	31	EFEPPQQGEQEGPR	But4C13-EFEPPQQGEQEGPR-COOH	14	61	42	But4C13			31_EFEPPQQGEQEGPR	But
Q9LUJ7		PAP85_ARATH Vicilin-like seed storage protein At3g22640 OS=Arabidopsis thaliana OX=3702 GN=PAP85 PE=2	31	EFEPPQQGEQEGPR	But4C13-EFEPPQQGEQEGPR-COOH	14	92	42	But4C13			31_EFEPPQQGEQEGPR	But
Q9LUJ7		PAP85_ARATH Vicilin-like seed storage protein At3g22640 OS=Arabidopsis thaliana OX=3702 GN=PAP85 PE=2	31	EFEPPQQGEQEGPR	But-EFEPPQQGEQEGPR-COOH	14	54	42	But			31_EFEPPQQGEQEGPR	But
Q9SIN3		Q9SIN3_ARATH Late embryogenesis abundant domain-containing protein / LEA domain-containing protein OS=Arabidopsis thaliana OX=3702 GN=At2g42560 PE=4	235	GQQAKESVGEGAQKAGSATSEKAQR	NH2-GQQAK<But4C13>ESVGEGAQK<But4C13>AGSATSEK<But4C13>AQR-COOH	25	83	45	NH2			235_GQQAKESVGEGAQKAGSATSEKAQR
Q9SIN3		Q9SIN3_ARATH Late embryogenesis abundant domain-containing protein / LEA domain-containing protein OS=Arabidopsis thaliana OX=3702 GN=At2g42560 PE=4	244	EGAQKAGSATSEKAQR	But4C13-EGAQK<But4C13>AGSATSEK<But4C13>AQR-COOH	16	61	45	But4C13			244_EGAQKAGSATSEKAQR	But
Q9SIN3		Q9SIN3_ARATH Late embryogenesis abundant domain-containing protein / LEA domain-containing protein OS=Arabidopsis thaliana OX=3702 GN=At2g42560 PE=4	235	GQQAKESVGEGAQKAGSATSEKAQR	NH2-GQQAK<But4C13>ESVGEGAQK<But4C13>AGSATSEK<But4C13>AQR-COOH	25	69	45	NH2			235_GQQAKESVGEGAQKAGSATSEKAQR
Q9SIN3		Q9SIN3_ARATH Late embryogenesis abundant domain-containing protein / LEA domain-containing protein OS=Arabidopsis thaliana OX=3702 GN=At2g42560 PE=4	244	EGAQKAGSATSEKAQR	But-EGAQK<But>AGSATSEK<But>AQR-COOH	16	64	45	But			244_EGAQKAGSATSEKAQR	But
F4I7I0		ALAT1_ARATH Alanine aminotransferase 1, mitochondrial OS=Arabidopsis thaliana OX=3702 GN=ALAAT1 PE=1	292	PTGQVLSEENQR	But4C13-PTGQVLSEENQR-COOH	12	90	45	But4C13			292_PTGQVLSEENQR	But
A0A1P8BH17	Q9XGR4 (226-233)	A0A1P8BH17_ARATH Calcium-binding EF-hand family protein OS=Arabidopsis thaliana OX=3702 GN=At5g44090 PE=4	261	QPGCKYLR	NH2-Q<Pyr>PGC<Cmm*>K<But4C13>YLR-COOH	8	64	45	NH2	Q<Pyr>		261_QPGCKYLR
Q9FH31		2SS5_ARATH 2S seed storage protein 5 OS=Arabidopsis thaliana OX=3702 GN=SESA5 PE=1	25	TVVEFEEDDDVSNPQQGKCQR	NH2-TVVEFEEDDDVSNPQQGK<But4C13>C<Cmm*>QR-COOH	21	48	41	NH2			25_TVVEFEEDDDVSNPQQGKCQR
Q9SIN3		Q9SIN3_ARATH Late embryogenesis abundant domain-containing protein / LEA domain-containing protein OS=Arabidopsis thaliana OX=3702 GN=At2g42560 PE=4	235	GQQAKESVGEGAQKAGSATSEKAQR	NH2-GQQAK<But4C13>ESVGEGAQK<But4C13>AGSATSEK<But4C13>AQR-COOH	25	62	45	NH2			235_GQQAKESVGEGAQKAGSATSEKAQR
P15456		CRU2_ARATH 12S seed storage protein CRB OS=Arabidopsis thaliana OX=3702 GN=CRB PE=1	167	AADLASNQNQLDR	But-AADLASNQNQLDR-COOH	13	62	44	But			167_AADLASNQNQLDR	But
P15456		CRU2_ARATH 12S seed storage protein CRB OS=Arabidopsis thaliana OX=3702 GN=CRB PE=1	167	AADLASNQNQLDR	But-AADLASNQNQLDR-COOH	13	81	44	But			167_AADLASNQNQLDR	But
P15455	F4K8S2 (96-105)	CRU1_ARATH 12S seed storage protein CRA1 OS=Arabidopsis thaliana OX=3702 GN=CRA1 PE=1	283	GLEETICSAR	But-GLEETIC<Cmm*>SAR-COOH	10	63	44	But			283_GLEETICSAR	But
A0A1P8ATG5	P93047 (1-11)	A0A1P8ATG5_ARATH High mobility group B3 OS=Arabidopsis thaliana OX=3702 GN=HMGB3 PE=4	1	MKGAKSKAETR	Ace-M<Mox*>K<But4C13>GAK<But4C13>SK<But4C13>AETR-COOH	11	56	45	Ace		Ace	1_MKGAKSKAETR
A0A1P8B543	F4JLA9 (109-135)^AQ96318 (109-135)	A0A1P8B543_ARATH Cruciferin 3 OS=Arabidopsis thaliana OX=3702 GN=CRU3 PE=1	109	VVPGCAETFMDSQPMQGQQQGQPWQGR	NH2-VVPGC<Cmm*>AETFM<Mox*>DSQPM<Mox*>QGQQQGQPWQGR-COOH	27	37	37	NH2			109_VVPGCAETFMDSQPMQGQQQGQPWQGR
Q9FJA6	Q9SIP7 (2-9)	RS33_ARATH 40S ribosomal protein S3-3 OS=Arabidopsis thaliana OX=3702 GN=RPS3C PE=1	2	ATQISKKR	Ace-ATQISK<But4C13>K<But4C13>R-COOH	8	43	40	Ace		Ace	2_ATQISKKR
Q9SKP0	A0A1P8B189 (338-357)	ECP63_ARATH Late embryogenesis abundant protein ECP63 OS=Arabidopsis thaliana OX=3702 GN=ECP63 PE=2	338	ESTESGAQKAEETKDSAAVR	NH2-ESTESGAQK<But4C13>AEETK<But4C13>DSAAVR-COOH	20	63	45	NH2			338_ESTESGAQKAEETKDSAAVR
Q9SIN3		Q9SIN3_ARATH Late embryogenesis abundant domain-containing protein / LEA domain-containing protein OS=Arabidopsis thaliana OX=3702 GN=At2g42560 PE=4	235	GQQAKESVGEGAQKAGSATSEKAQR	NH2-GQQAK<But4C13>ESVGEGAQK<But4C13>AGSATSEK<But4C13>AQR-COOH	25	82	45	NH2			235_GQQAKESVGEGAQKAGSATSEKAQR
Q9SKP0	A0A1P8B189 (338-357)	ECP63_ARATH Late embryogenesis abundant protein ECP63 OS=Arabidopsis thaliana OX=3702 GN=ECP63 PE=2	338	ESTESGAQKAEETKDSAAVR	NH2-ESTESGAQK<But4C13>AEETK<But4C13>DSAAVR-COOH	20	94	45	NH2			338_ESTESGAQKAEETKDSAAVR
Q9SKP0	A0A1P8B189 (338-357)	ECP63_ARATH Late embryogenesis abundant protein ECP63 OS=Arabidopsis thaliana OX=3702 GN=ECP63 PE=2	338	ESTESGAQKAEETKDSAAVR	NH2-ESTESGAQK<But4C13>AEETK<But4C13>DSAAVR-COOH	20	70	45	NH2			338_ESTESGAQKAEETKDSAAVR
A0A1P8B543	F4JLA9 (114-135)^AQ96318 (114-135)	A0A1P8B543_ARATH Cruciferin 3 OS=Arabidopsis thaliana OX=3702 GN=CRU3 PE=1	114	AETFMDSQPMQGQQQGQPWQGR	But-AETFM<Mox*>DSQPM<Mox*>QGQQQGQPWQGR-COOH	22	42	36	But			114_AETFMDSQPMQGQQQGQPWQGR	But
O49596		HMGB2_ARATH High mobility group B protein 2 OS=Arabidopsis thaliana OX=3702 GN=HMGB2 PE=1	1	MKGAKSKTETR	Ace-M<Mox*>K<But4C13>GAK<But4C13>SK<But4C13>TETR-COOH	11	71	45	Ace		Ace	1_MKGAKSKTETR
Q9SKP0	A0A1P8B189 (338-357)	ECP63_ARATH Late embryogenesis abundant protein ECP63 OS=Arabidopsis thaliana OX=3702 GN=ECP63 PE=2	338	ESTESGAQKAEETKDSAAVR	NH2-ESTESGAQK<But4C13>AEETK<But4C13>DSAAVR-COOH	20	56	45	NH2			338_ESTESGAQKAEETKDSAAVR
Q9SIN3		Q9SIN3_ARATH Late embryogenesis abundant domain-containing protein / LEA domain-containing protein OS=Arabidopsis thaliana OX=3702 GN=At2g42560 PE=4	235	GQQAKESVGEGAQKAGSATSEKAQR	NH2-GQQAK<But4C13>ESVGEGAQK<But4C13>AGSATSEK<But4C13>AQR-COOH	25	118	45	NH2			235_GQQAKESVGEGAQKAGSATSEKAQR
Q9SIN3		Q9SIN3_ARATH Late embryogenesis abundant domain-containing protein / LEA domain-containing protein OS=Arabidopsis thaliana OX=3702 GN=At2g42560 PE=4	235	GQQAKESVGEGAQKAGSATSEKAQR	NH2-GQQAK<But4C13>ESVGEGAQK<But4C13>AGSATSEK<But4C13>AQR-COOH	25	85	45	NH2			235_GQQAKESVGEGAQKAGSATSEKAQR
O49596		HMGB2_ARATH High mobility group B protein 2 OS=Arabidopsis thaliana OX=3702 GN=HMGB2 PE=1	1	MKGAKSKTETR	Ace-M<Mox*>K<But4C13>GAK<But4C13>SK<But4C13>TETR-COOH	11	64	45	Ace		Ace	1_MKGAKSKTETR
Q9SVD1		Q9SVD1_ARATH At3g52500 OS=Arabidopsis thaliana OX=3702 GN=F22O6_120 PE=2	224	QPAGIAGFGR	NH2-Q<Pyr>PAGIAGFGR-COOH	10	45	44	NH2	Q<Pyr>		224_QPAGIAGFGR
Q9LTF2		RS103_ARATH 40S ribosomal protein S10-3 OS=Arabidopsis thaliana OX=3702 GN=RPS10C PE=2	1	MIISEANR	But-M<Mox*>IISEANR-COOH	8	52	45	But			1_MIISEANR	But
Q9SK09		VCL22_ARATH Vicilin-like seed storage protein At2g28490 OS=Arabidopsis thaliana OX=3702 GN=At2g28490 PE=2	247	GPIVYVTEGPQPQPQ	NH2-GPIVYVTEGPQPQPQ-COOH	15	49	46	NH2			247_GPIVYVTEGPQPQPQ
A0A1P8B543	F4JLA9 (109-135)^AQ96318 (109-135)	A0A1P8B543_ARATH Cruciferin 3 OS=Arabidopsis thaliana OX=3702 GN=CRU3 PE=1	109	VVPGCAETFMDSQPMQGQQQGQPWQGR	NH2-VVPGC<Cmm*>AETFM<Mox*>DSQPM<Mox*>QGQQQGQPWQGR-COOH	27	45	37	NH2			109_VVPGCAETFMDSQPMQGQQQGQPWQGR
P15455	F4K8S2 (223-233)	CRU1_ARATH 12S seed storage protein CRA1 OS=Arabidopsis thaliana OX=3702 GN=CRA1 PE=1	410	ANAQINTLAGR	But-ANAQINTLAGR-COOH	11	49	45	But			410_ANAQINTLAGR	But
Q9SKP0	A0A1P8B189 (338-357)	ECP63_ARATH Late embryogenesis abundant protein ECP63 OS=Arabidopsis thaliana OX=3702 GN=ECP63 PE=2	338	ESTESGAQKAEETKDSAAVR	NH2-ESTESGAQK<But4C13>AEETK<But4C13>DSAAVR-COOH	20	67	45	NH2			338_ESTESGAQKAEETKDSAAVR
Q9SKP0	A0A1P8B189 (338-357)	ECP63_ARATH Late embryogenesis abundant protein ECP63 OS=Arabidopsis thaliana OX=3702 GN=ECP63 PE=2	338	ESTESGAQKAEETKDSAAVR	NH2-ESTESGAQK<But4C13>AEETK<But4C13>DSAAVR-COOH	20	104	45	NH2			338_ESTESGAQKAEETKDSAAVR
O49596		HMGB2_ARATH High mobility group B protein 2 OS=Arabidopsis thaliana OX=3702 GN=HMGB2 PE=1	4	AKSKTETR	But4C13-AK<But4C13>SK<But4C13>TETR-COOH	8	49	44	But4C13			4_AKSKTETR	But
P15455	F4K8S2 (223-233)	CRU1_ARATH 12S seed storage protein CRA1 OS=Arabidopsis thaliana OX=3702 GN=CRA1 PE=1	410	ANAQINTLAGR	But-ANAQINTLAGR-COOH	11	52	45	But			410_ANAQINTLAGR	But
A0A1P8B543	F4JLA9 (109-135)^AQ96318 (109-135)	A0A1P8B543_ARATH Cruciferin 3 OS=Arabidopsis thaliana OX=3702 GN=CRU3 PE=1	109	VVPGCAETFMDSQPMQGQQQGQPWQGR	NH2-VVPGC<Cmm*>AETFM<Mox*>DSQPM<Mox*>QGQQQGQPWQGR-COOH	27	41	37	NH2			109_VVPGCAETFMDSQPMQGQQQGQPWQGR
Q9SK09		VCL22_ARATH Vicilin-like seed storage protein At2g28490 OS=Arabidopsis thaliana OX=3702 GN=At2g28490 PE=2	247	GPIVYVTEGPQPQPQ	NH2-GPIVYVTEGPQPQPQ-COOH	15	61	46	NH2			247_GPIVYVTEGPQPQPQ
Q9SKP0	A0A1P8B189 (338-357)	ECP63_ARATH Late embryogenesis abundant protein ECP63 OS=Arabidopsis thaliana OX=3702 GN=ECP63 PE=2	338	ESTESGAQKAEETKDSAAVR	NH2-ESTESGAQK<But4C13>AEETK<But4C13>DSAAVR-COOH	20	107	45	NH2			338_ESTESGAQKAEETKDSAAVR
A0A1I9LMY7	Q8LC83 (2-9)^AQ9SS17 (2-9)	A0A1I9LMY7_ARATH 40S ribosomal protein S24 OS=Arabidopsis thaliana OX=3702 GN=At3g04920 PE=3	2	AEKAVTIR	Ace-AEK<But4C13>AVTIR-COOH	8	51	43	Ace		Ace	2_AEKAVTIR
Q9SKP0	A0A1P8B189 (338-357)	ECP63_ARATH Late embryogenesis abundant protein ECP63 OS=Arabidopsis thaliana OX=3702 GN=ECP63 PE=2	338	ESTESGAQKAEETKDSAAVR	NH2-ESTESGAQK<But>AEETK<But>DSAAVR-COOH	20	68	44	NH2			338_ESTESGAQKAEETKDSAAVR
Q9SKP0	A0A1P8B189 (338-357)	ECP63_ARATH Late embryogenesis abundant protein ECP63 OS=Arabidopsis thaliana OX=3702 GN=ECP63 PE=2	338	ESTESGAQKAEETKDSAAVR	NH2-ESTESGAQK<But4C13>AEETK<But4C13>DSAAVR-COOH	20	155	45	NH2			338_ESTESGAQKAEETKDSAAVR
Q5XV94		Q5XV94_ARATH NEFA-interacting nuclear protein OS=Arabidopsis thaliana OX=3702 GN=At3g62140 PE=2	2	VDETEKPIR	Ace-VDETEK<But4C13>PIR-COOH	9	63	46	Ace		Ace	2_VDETEKPIR
Q9LV35		AIP12_ARATH Actin-interacting protein 1-2 OS=Arabidopsis thaliana OX=3702 GN=AIP1-2 PE=2	1	MELSETYACVPSTER	Ace-M<Mox*>ELSETYAC<Cmm*>VPSTER-COOH	15	64	40	Ace		Ace	1_MELSETYACVPSTER
Q9SK09		VCL22_ARATH Vicilin-like seed storage protein At2g28490 OS=Arabidopsis thaliana OX=3702 GN=At2g28490 PE=2	247	GPIVYVTEGPQPQPQ	NH2-GPIVYVTEGPQPQPQ-COOH	15	68	45	NH2			247_GPIVYVTEGPQPQPQ
A0A1P8B543	F4JLA9 (142-154)^AQ96318 (142-154)	A0A1P8B543_ARATH Cruciferin 3 OS=Arabidopsis thaliana OX=3702 GN=CRU3 PE=1	142	PWEGQGQQGQQGR	But-PWEGQGQQGQQGR-COOH	13	105	43	But			142_PWEGQGQQGQQGR	But
A0A1P8B543	F4JLA9 (142-154)^AQ96318 (142-154)	A0A1P8B543_ARATH Cruciferin 3 OS=Arabidopsis thaliana OX=3702 GN=CRU3 PE=1	142	PWEGQGQQGQQGR	But-PWEGQGQQGQQGR-COOH	13	89	43	But			142_PWEGQGQQGQQGR	But
A0A1P8B543	F4JLA9 (175-190)^AQ96318 (175-190)	A0A1P8B543_ARATH Cruciferin 3 OS=Arabidopsis thaliana OX=3702 GN=CRU3 PE=1	159	GQPWEGQGQQGQQGFR	But-GQPWEGQGQQGQQGFR-COOH	16	66	42	But			159_GQPWEGQGQQGQQGFR	But
A0A1P8B543	Q96318 (317-325)	A0A1P8B543_ARATH Cruciferin 3 OS=Arabidopsis thaliana OX=3702 GN=CRU3 PE=1	301	QPYESEEWR	NH2-Q<Pyr>PYESEEWR-COOH	9	59	39	NH2	Q<Pyr>		301_QPYESEEWR
A0A1P8B543	F4JLA9 (175-190)^AQ96318 (175-190)	A0A1P8B543_ARATH Cruciferin 3 OS=Arabidopsis thaliana OX=3702 GN=CRU3 PE=1	159	GQPWEGQGQQGQQGFR	But-GQPWEGQGQQGQQGFR-COOH	16	102	42	But			159_GQPWEGQGQQGQQGFR	But
B9DG17	Q08682 (2-20)	B9DG17_ARATH 40S ribosomal protein SA OS=Arabidopsis thaliana OX=3702 GN=P40 PE=1	2	ATNGSASSAQLSQKEADVR	Ace-ATNGSASSAQLSQK<But>EADVR-COOH	19	108	45	Ace		Ace	2_ATNGSASSAQLSQKEADVR
A0A1I9LMY7	Q8LC83 (2-9)^AQ9SS17 (2-9)	A0A1I9LMY7_ARATH 40S ribosomal protein S24 OS=Arabidopsis thaliana OX=3702 GN=At3g04920 PE=3	2	AEKAVTIR	Ace-AEK<But4C13>AVTIR-COOH	8	57	43	Ace		Ace	2_AEKAVTIR
A0A1P8B543	F4JLA9 (175-190)^AQ96318 (175-190)	A0A1P8B543_ARATH Cruciferin 3 OS=Arabidopsis thaliana OX=3702 GN=CRU3 PE=1	159	GQPWEGQGQQGQQGFR	But4C13-GQPWEGQGQQGQQGFR-COOH	16	110	43	But4C13			159_GQPWEGQGQQGQQGFR	But
A0A1P8B7I6	F4JQF1 (280-301)	A0A1P8B7I6_ARATH Late embryogenesis abundant (LEA) protein OS=Arabidopsis thaliana OX=3702 GN=AP22.17 PE=4	286	AVDYAKDKANDAYESGSEAAGR	NH2-AVDYAK<But4C13>DK<But4C13>ANDAYESGSEAAGR-COOH	22	62	43	NH2			286_AVDYAKDKANDAYESGSEAAGR
A0A1P8B543	F4JLA9 (175-190)^AQ96318 (175-190)	A0A1P8B543_ARATH Cruciferin 3 OS=Arabidopsis thaliana OX=3702 GN=CRU3 PE=1	159	GQPWEGQGQQGQQGFR	But-GQPWEGQGQQGQQGFR-COOH	16	88	42	But			159_GQPWEGQGQQGQQGFR	But
Q9SKP0		ECP63_ARATH Late embryogenesis abundant protein ECP63 OS=Arabidopsis thaliana OX=3702 GN=ECP63 PE=2	416	VATSLKASDQMTGQTFNDVGR	NH2-VATSLK<But4C13>ASDQM<Mox*>TGQTFNDVGR-COOH	21	74	45	NH2			416_VATSLKASDQMTGQTFNDVGR
Q9SKP0		ECP63_ARATH Late embryogenesis abundant protein ECP63 OS=Arabidopsis thaliana OX=3702 GN=ECP63 PE=2	416	VATSLKASDQMTGQTFNDVGR	NH2-VATSLK<But4C13>ASDQM<Mox*>TGQTFNDVGR-COOH	21	55	45	NH2			416_VATSLKASDQMTGQTFNDVGR
Q3E8H9	Q9FKV7 (213-230)	Q3E8H9_ARATH Late embryogenesis abundant protein (LEA) family protein OS=Arabidopsis thaliana OX=3702 GN=At5g44310 PE=4	177	TKNYAEQTKDKVNEGASR	NH2-TK<But4C13>NYAEQTK<But4C13>DK<But4C13>VNEGASR-COOH	18	107	46	NH2			177_TKNYAEQTKDKVNEGASR
Q9SIN3		Q9SIN3_ARATH Late embryogenesis abundant domain-containing protein / LEA domain-containing protein OS=Arabidopsis thaliana OX=3702 GN=At2g42560 PE=4	579	YVEEEGVGAGGVL	NH2-YVEEEGVGAGGVL-COOH	13	46	45	NH2			579_YVEEEGVGAGGVL
P15458	P15460 (104-115)	2SS2_ARATH 2S seed storage protein 2 OS=Arabidopsis thaliana OX=3702 GN=AT2S2 PE=2	108	QEEPVCVCPTLR	NH2-QEEPVC<Cmm*>VC<Cmm*>PTLR-COOH	12	50	44	NH2			108_QEEPVCVCPTLR
A0A1P8B543	F4JLA9 (175-190)^AQ96318 (175-190)	A0A1P8B543_ARATH Cruciferin 3 OS=Arabidopsis thaliana OX=3702 GN=CRU3 PE=1	159	GQPWEGQGQQGQQGFR	But4C13-GQPWEGQGQQGQQGFR-COOH	16	50	43	But4C13			159_GQPWEGQGQQGQQGFR	But
Q8RWG8	Q9LMK7 (17-33)	RBP1B_ARATH Ran-binding protein 1 homolog b OS=Arabidopsis thaliana OX=3702 GN=RANBP1B PE=1	19	GANEDEDTGAQVAPIVR	But-GANEDEDTGAQVAPIVR-COOH	17	99	44	But			19_GANEDEDTGAQVAPIVR	But
Q9SK09		VCL22_ARATH Vicilin-like seed storage protein At2g28490 OS=Arabidopsis thaliana OX=3702 GN=At2g28490 PE=2	247	GPIVYVTEGPQPQPQ	NH2-GPIVYVTEGPQPQPQ-COOH	15	52	46	NH2			247_GPIVYVTEGPQPQPQ
Q9SAH1		Q9SAH1_ARATH At1g80890 OS=Arabidopsis thaliana OX=3702 GN=At1g80890 PE=2	2	GNESKSNLGGGGIR	But4C13-GNESK<But4C13>SNLGGGGIR-COOH	14	87	45	But4C13			2_GNESKSNLGGGGIR	But
A0A1P8ATG5	P93047 (1-11)	A0A1P8ATG5_ARATH High mobility group B3 OS=Arabidopsis thaliana OX=3702 GN=HMGB3 PE=4	1	MKGAKSKAETR	Ace-M<Mox*>K<But4C13>GAK<But4C13>SK<But4C13>AETR-COOH	11	69	45	Ace		Ace	1_MKGAKSKAETR
A0A1P8ATG5	P93047 (1-11)	A0A1P8ATG5_ARATH High mobility group B3 OS=Arabidopsis thaliana OX=3702 GN=HMGB3 PE=4	1	MKGAKSKAETR	Ace-M<Mox*>K<But4C13>GAK<But4C13>SK<But4C13>AETR-COOH	11	62	45	Ace		Ace	1_MKGAKSKAETR
A0A1P8ATG5	P93047 (1-11)	A0A1P8ATG5_ARATH High mobility group B3 OS=Arabidopsis thaliana OX=3702 GN=HMGB3 PE=4	1	MKGAKSKAETR	Ace-M<Mox*>K<But>GAK<But>SK<But>AETR-COOH	11	61	46	Ace		Ace	1_MKGAKSKAETR
Q9LX33		FNTA_ARATH Protein farnesyltransferase/geranylgeranyltransferase type-1 subunit alpha OS=Arabidopsis thaliana OX=3702 GN=FTA PE=1	1	MNFDETVPLSQR	Ace-M<Mox*>NFDETVPLSQR-COOH	12	50	43	Ace		Ace	1_MNFDETVPLSQR
Q9SUB2		Q9SUB2_ARATH Late embryogenesis abundant protein (LEA) family protein OS=Arabidopsis thaliana OX=3702 GN=At4g21020 PE=2	154	AKDYAEDTMDNAKEKAR	NH2-AK<But4C13>DYAEDTM<Mox*>DNAK<But4C13>EK<But4C13>AR-COOH	17	53	45	NH2			154_AKDYAEDTMDNAKEKAR
Q9SIN3		Q9SIN3_ARATH Late embryogenesis abundant domain-containing protein / LEA domain-containing protein OS=Arabidopsis thaliana OX=3702 GN=At2g42560 PE=4	235	GQQAKESVGEGAQKAGSATSEKAQR	NH2-GQQAK<But4C13>ESVGEGAQK<But4C13>AGSATSEK<But4C13>AQR-COOH	25	102	45	NH2			235_GQQAKESVGEGAQKAGSATSEKAQR
Q9C9B9		TTM1_ARATH Inorganic pyrophosphatase TTM1 OS=Arabidopsis thaliana OX=3702 GN=TTM1 PE=1	2	ALDSSVALSPR	Ace-ALDSSVALSPR-COOH	11	53	45	Ace		Ace	2_ALDSSVALSPR
Q941R6		MLP31_ARATH MLP-like protein 31 OS=Arabidopsis thaliana OX=3702 GN=MLP31 PE=2	2	ATKMAGAAMNLAKR	Ace-ATK<But4C13>M<Mox*>AGAAM<Mox*>NLAK<But4C13>R-COOH	14	49	45	Ace		Ace	2_ATKMAGAAMNLAKR
B9DG17	Q08682 (2-20)	B9DG17_ARATH 40S ribosomal protein SA OS=Arabidopsis thaliana OX=3702 GN=P40 PE=1	2	ATNGSASSAQLSQKEADVR	Ace-ATNGSASSAQLSQK<But4C13>EADVR-COOH	19	119	45	Ace		Ace	2_ATNGSASSAQLSQKEADVR
A0A1I9LMY7	Q8LC83 (2-9)^AQ9SS17 (2-9)	A0A1I9LMY7_ARATH 40S ribosomal protein S24 OS=Arabidopsis thaliana OX=3702 GN=At3g04920 PE=3	2	AEKAVTIR	Ace-AEK<But4C13>AVTIR-COOH	8	45	44	Ace		Ace	2_AEKAVTIR
Q9SK09		VCL22_ARATH Vicilin-like seed storage protein At2g28490 OS=Arabidopsis thaliana OX=3702 GN=At2g28490 PE=2	247	GPIVYVTEGPQPQPQ	NH2-GPIVYVTEGPQPQPQ-COOH	15	47	46	NH2			247_GPIVYVTEGPQPQPQ
Q9C505		IF5A3_ARATH Eukaryotic translation initiation factor 5A-3 OS=Arabidopsis thaliana OX=3702 GN=ELF5A-3 PE=2	14	GASKTYPQQAGNIR	But4C13-GASK<But4C13>TYPQQAGNIR-COOH	14	63	45	But4C13			14_GASKTYPQQAGNIR	But
Q42431		OLEO4_ARATH Oleosin 20.3 kDa OS=Arabidopsis thaliana OX=3702 GN=OL2 PE=2	131	GTSDTVPEQLDYAKR	NH2-GTSDTVPEQLDYAK<But4C13>R-COOH	15	55	45	NH2			131_GTSDTVPEQLDYAKR
Q9LUJ7		PAP85_ARATH Vicilin-like seed storage protein At3g22640 OS=Arabidopsis thaliana OX=3702 GN=PAP85 PE=2	32	FEPPQQGEQEGPR	But4C13-FEPPQQGEQEGPR-COOH	13	61	43	But4C13			32_FEPPQQGEQEGPR	But
Q9ZWA9		CRU4_ARATH 12S seed storage protein CRD OS=Arabidopsis thaliana OX=3702 GN=CRD PE=1	434	IKFSQQETMLSMTPSSSS	NH2-IK<But4C13>FSQQETM<Mox*>LSM<Mox*>TPSSSS-COOH	18	46	43	NH2			434_IKFSQQETMLSMTPSSSS
Q9C505		IF5A3_ARATH Eukaryotic translation initiation factor 5A-3 OS=Arabidopsis thaliana OX=3702 GN=ELF5A-3 PE=2	14	GASKTYPQQAGNIR	But4C13-GASK<But4C13>TYPQQAGNIR-COOH	14	55	45	But4C13			14_GASKTYPQQAGNIR	But
A0A1P8ATG5	P93047 (1-11)	A0A1P8ATG5_ARATH High mobility group B3 OS=Arabidopsis thaliana OX=3702 GN=HMGB3 PE=4	1	MKGAKSKAETR	Ace-M<Mox*>K<But4C13>GAK<But4C13>SK<But4C13>AETR-COOH	11	46	45	Ace		Ace	1_MKGAKSKAETR
Q9SZE4		VP322_ARATH Vacuolar protein sorting-associated protein 32 homolog 2 OS=Arabidopsis thaliana OX=3702 GN=VPS32.2 PE=1	204	TAEEEELAALQAE	NH2-TAEEEELAALQAE-COOH	13	49	43	NH2			204_TAEEEELAALQAE
A0A1P8ATG5	P93047 (1-11)	A0A1P8ATG5_ARATH High mobility group B3 OS=Arabidopsis thaliana OX=3702 GN=HMGB3 PE=4	1	MKGAKSKAETR	Ace-M<Mox*>K<But4C13>GAK<But4C13>SK<But4C13>AETR-COOH	11	51	44	Ace		Ace	1_MKGAKSKAETR
Q941R6		MLP31_ARATH MLP-like protein 31 OS=Arabidopsis thaliana OX=3702 GN=MLP31 PE=2	2	ATKMAGAAMNLAKR	Ace-ATK<But4C13>M<Mox*>AGAAM<Mox*>NLAK<But4C13>R-COOH	14	47	45	Ace		Ace	2_ATKMAGAAMNLAKR
Q93W30		Q93W30_ARATH Expressed protein OS=Arabidopsis thaliana OX=3702 GN=At2g35605 PE=2	13	AKAASSTGAKTGR	But4C13-AK<But4C13>AASSTGAK<But4C13>TGR-COOH	13	70	44	But4C13			13_AKAASSTGAKTGR	But
P82873		TO202_ARATH Mitochondrial import receptor subunit TOM20-2 OS=Arabidopsis thaliana OX=3702 GN=TOM20-2 PE=1	1	MEFSTADFER	Ace-M<Mox*>EFSTADFER-COOH	10	67	37	Ace		Ace	1_MEFSTADFER
F4JLA9	Q96318 (461-471)	F4JLA9_ARATH Cruciferin 3 OS=Arabidopsis thaliana OX=3702 GN=CRU3 PE=1	390	ENAMISTLAGR	But-ENAM<Mox*>ISTLAGR-COOH	11	52	45	But			390_ENAMISTLAGR	But
Q9LD57		PGKH1_ARATH Phosphoglycerate kinase 1, chloroplastic OS=Arabidopsis thaliana OX=3702 GN=PGK1 PE=1	99	ADLNVPLDDNQTITDDTR	NH2-ADLNVPLDDNQTITDDTR-COOH	18	83	44	NH2			99_ADLNVPLDDNQTITDDTR
O65902		ACAP1_ARATH Cyclase-associated protein 1 OS=Arabidopsis thaliana OX=3702 GN=CAP1 PE=2	1	MEEDLIKR	Ace-M<Mox*>EEDLIK<But>R-COOH	8	52	45	Ace		Ace	1_MEEDLIKR
Q9SIN3		Q9SIN3_ARATH Late embryogenesis abundant domain-containing protein / LEA domain-containing protein OS=Arabidopsis thaliana OX=3702 GN=At2g42560 PE=4	246	AQKAGSATSEKAQR	But-AQK<But>AGSATSEK<But>AQR-COOH	14	81	45	But			246_AQKAGSATSEKAQR	But
A0A2H1ZEH9	Q8H0X6 (49-57)	A0A2H1ZEH9_ARATH Cysteine proteinase inhibitor OS=Arabidopsis thaliana OX=3702 GN=CYSB PE=1	16	SGEVESLAR	But4C13-SGEVESLAR-COOH	9	51	46	But4C13			16_SGEVESLAR	But
A0A2H1ZEH9	Q8H0X6 (49-57)	A0A2H1ZEH9_ARATH Cysteine proteinase inhibitor OS=Arabidopsis thaliana OX=3702 GN=CYSB PE=1	16	SGEVESLAR	But-SGEVESLAR-COOH	9	49	45	But			16_SGEVESLAR	But
O65902		ACAP1_ARATH Cyclase-associated protein 1 OS=Arabidopsis thaliana OX=3702 GN=CAP1 PE=2	1	MEEDLIKR	Ace-M<Mox*>EEDLIK<But4C13>R-COOH	8	53	46	Ace		Ace	1_MEEDLIKR
Q941R6		MLP31_ARATH MLP-like protein 31 OS=Arabidopsis thaliana OX=3702 GN=MLP31 PE=2	2	ATKMAGAAMNLAKR	Ace-ATK<But4C13>M<Mox*>AGAAM<Mox*>NLAK<But4C13>R-COOH	14	52	45	Ace		Ace	2_ATKMAGAAMNLAKR
Q8L7A9		AP4E_ARATH AP-4 complex subunit epsilon OS=Arabidopsis thaliana OX=3702 GN=At1g31730 PE=1	1	MEQLKTIGR	Ace-M<Mox*>EQLK<But4C13>TIGR-COOH	9	54	45	Ace		Ace	1_MEQLKTIGR
Q941R6		MLP31_ARATH MLP-like protein 31 OS=Arabidopsis thaliana OX=3702 GN=MLP31 PE=2	2	ATKMAGAAMNLAKR	Ace-ATK<But4C13>M<Mox*>AGAAM<Mox*>NLAK<But4C13>R-COOH	14	64	45	Ace		Ace	2_ATKMAGAAMNLAKR
Q8L7A9		AP4E_ARATH AP-4 complex subunit epsilon OS=Arabidopsis thaliana OX=3702 GN=At1g31730 PE=1	1	MEQLKTIGR	Ace-M<Mox*>EQLK<But>TIGR-COOH	9	59	46	Ace		Ace	1_MEQLKTIGR
Q9ZWA9		CRU4_ARATH 12S seed storage protein CRD OS=Arabidopsis thaliana OX=3702 GN=CRD PE=1	434	IKFSQQETMLSMTPSSSS	NH2-IK<But4C13>FSQQETM<Mox*>LSM<Mox*>TPSSSS-COOH	18	62	43	NH2			434_IKFSQQETMLSMTPSSSS
Q8LC12		Q8LC12_ARATH At4g01897 OS=Arabidopsis thaliana OX=3702 GN=At4g01897 PE=1	2	AEEEFIYR	Ace-AEEEFIYR-COOH	8	71	43	Ace		Ace	2_AEEEFIYR
A0A1P8B543	F4JLA9 (178-190)^AQ96318 (178-190)	A0A1P8B543_ARATH Cruciferin 3 OS=Arabidopsis thaliana OX=3702 GN=CRU3 PE=1	162	WEGQGQQGQQGFR	But4C13-WEGQGQQGQQGFR-COOH	13	86	43	But4C13			162_WEGQGQQGQQGFR	But
A0A1P8B543	F4JLA9 (178-190)^AQ96318 (178-190)	A0A1P8B543_ARATH Cruciferin 3 OS=Arabidopsis thaliana OX=3702 GN=CRU3 PE=1	162	WEGQGQQGQQGFR	But-WEGQGQQGQQGFR-COOH	13	103	42	But			162_WEGQGQQGQQGFR	But
Q9SIN3		Q9SIN3_ARATH Late embryogenesis abundant domain-containing protein / LEA domain-containing protein OS=Arabidopsis thaliana OX=3702 GN=At2g42560 PE=4	555	PKGTVEEAR	But-PK<But>GTVEEAR-COOH	9	49	45	But			555_PKGTVEEAR	But
Q941R6		MLP31_ARATH MLP-like protein 31 OS=Arabidopsis thaliana OX=3702 GN=MLP31 PE=2	2	ATKMAGAAMNLAKR	Ace-ATK<But4C13>M<Mox*>AGAAM<Mox*>NLAK<But4C13>R-COOH	14	75	45	Ace		Ace	2_ATKMAGAAMNLAKR
F4J462	Q9LUG1 (2-16)	F4J462_ARATH Protein transport protein SEC23 OS=Arabidopsis thaliana OX=3702 GN=At3g23660 PE=1	2	AETANTDLEGIDGVR	Ace-AETANTDLEGIDGVR-COOH	15	99	44	Ace		Ace	2_AETANTDLEGIDGVR
F4J462	Q9LUG1 (2-16)	F4J462_ARATH Protein transport protein SEC23 OS=Arabidopsis thaliana OX=3702 GN=At3g23660 PE=1	2	AETANTDLEGIDGVR	Ace-AETANTDLEGIDGVR-COOH	15	100	44	Ace		Ace	2_AETANTDLEGIDGVR
B9DG73	F4J7I5 (18-34)^AF4J8J7 (18-34)^AQ9SF06 (18-34)	B9DG73_ARATH AT3G11930 protein OS=Arabidopsis thaliana OX=3702 GN=At3g11930 PE=1	18	QPETTTEAEAPSLTTKR	NH2-Q<Pyr>PETTTEAEAPSLTTK<But4C13>R-COOH	17	75	46	NH2	Q<Pyr>		18_QPETTTEAEAPSLTTKR
A0A1P8B1L2	A0A1P8B1N2 (178-185)^AF4IRD2 (203-210)^AF4IRD3 (203-210)	A0A1P8B1L2_ARATH MAK10 homologue OS=Arabidopsis thaliana OX=3702 GN=MAK10 PE=1	203	AVEETICR	But-AVEETIC<Cmm*>R-COOH	8	50	44	But			203_AVEETICR	But
P15455	F4K8S2 (225-233)	CRU1_ARATH 12S seed storage protein CRA1 OS=Arabidopsis thaliana OX=3702 GN=CRA1 PE=1	412	AQINTLAGR	But-AQINTLAGR-COOH	9	75	45	But			412_AQINTLAGR	But
Q9SU93		Q9SU93_ARATH Nucleophosmin OS=Arabidopsis thaliana OX=3702 GN=At4g29520 PE=4	28	AKKPSSTPR	But-AK<But>K<But>PSSTPR-COOH	9	52	44	But			28_AKKPSSTPR	But
Q8RV68		Q8RV68_ARATH Expressed protein OS=Arabidopsis thaliana OX=3702 GN=At2g31725 PE=2	141	MKTAFNITN	NH2-M<Mox*>K<But4C13>TAFNITN-COOH	9	52	45	NH2			141_MKTAFNITN
Q9ZWA9		CRU4_ARATH 12S seed storage protein CRD OS=Arabidopsis thaliana OX=3702 GN=CRD PE=1	434	IKFSQQETMLSMTPSSSS	NH2-IK<But4C13>FSQQETM<Mox*>LSM<Mox*>TPSSSS-COOH	18	69	43	NH2			434_IKFSQQETMLSMTPSSSS
P15455	F4K8S2 (225-233)	CRU1_ARATH 12S seed storage protein CRA1 OS=Arabidopsis thaliana OX=3702 GN=CRA1 PE=1	412	AQINTLAGR	But4C13-AQINTLAGR-COOH	9	57	44	But4C13			412_AQINTLAGR	But
Q941R6		MLP31_ARATH MLP-like protein 31 OS=Arabidopsis thaliana OX=3702 GN=MLP31 PE=2	2	ATKMAGAAMNLAKR	Ace-ATK<But4C13>M<Mox*>AGAAM<Mox*>NLAK<But4C13>R-COOH	14	67	45	Ace		Ace	2_ATKMAGAAMNLAKR
Q9LF88		Y3304_ARATH Late embryogenesis abundant protein At3g53040 OS=Arabidopsis thaliana OX=3702 GN=At3g53040 PE=2	157	AEYTAEKAR	But4C13-AEYTAEK<But4C13>AR-COOH	9	51	46	But4C13			157_AEYTAEKAR	But
Q9LF88		Y3304_ARATH Late embryogenesis abundant protein At3g53040 OS=Arabidopsis thaliana OX=3702 GN=At3g53040 PE=2	157	AEYTAEKAR	But-AEYTAEK<But>AR-COOH	9	54	45	But			157_AEYTAEKAR	But
Q9ZWA9		CRU4_ARATH 12S seed storage protein CRD OS=Arabidopsis thaliana OX=3702 GN=CRD PE=1	434	IKFSQQETMLSMTPSSSS	NH2-IK<But4C13>FSQQETM<Mox*>LSM<Mox*>TPSSSS-COOH	18	61	43	NH2			434_IKFSQQETMLSMTPSSSS
Q9LF98		ALFC8_ARATH Fructose-bisphosphate aldolase 8, cytosolic OS=Arabidopsis thaliana OX=3702 GN=FBA8 PE=1	107	GTVELAGTDGETTTQGLDGLGDR	NH2-GTVELAGTDGETTTQGLDGLGDR-COOH	23	81	44	NH2			107_GTVELAGTDGETTTQGLDGLGDR
A0A1P8B543	Q96318 (334-343)	A0A1P8B543_ARATH Cruciferin 3 OS=Arabidopsis thaliana OX=3702 GN=CRU3 PE=1	318	GLEETICSMR	But-GLEETIC<Cmm*>SM<Mox*>R-COOH	10	46	42	But			318_GLEETICSMR	But
F4JLA9	Q96318 (397-413)	F4JLA9_ARATH Cruciferin 3 OS=Arabidopsis thaliana OX=3702 GN=CRU3 PE=1	326	YNMNANEILYCTGGQGR	NH2-YNM<Mox*>NANEILYC<Cmm*>TGGQGR-COOH	17	99	39	NH2			326_YNMNANEILYCTGGQGR
Q9SIN3		Q9SIN3_ARATH Late embryogenesis abundant domain-containing protein / LEA domain-containing protein OS=Arabidopsis thaliana OX=3702 GN=At2g42560 PE=4	120	ANAQQKSMDSIKAAEER	NH2-ANAQQK<But4C13>SM<Mox*>DSIK<But4C13>AAEER-COOH	17	74	45	NH2			120_ANAQQKSMDSIKAAEER
Q941R6		MLP31_ARATH MLP-like protein 31 OS=Arabidopsis thaliana OX=3702 GN=MLP31 PE=2	2	ATKMAGAAMNLAKR	Ace-ATK<But>M<Mox*>AGAAM<Mox*>NLAK<But>R-COOH	14	71	46	Ace		Ace	2_ATKMAGAAMNLAKR
Q941R6		MLP31_ARATH MLP-like protein 31 OS=Arabidopsis thaliana OX=3702 GN=MLP31 PE=2	2	ATKMAGAAMNLAKR	Ace-ATK<But>M<Mox*>AGAAM<Mox*>NLAK<But>R-COOH	14	54	46	Ace		Ace	2_ATKMAGAAMNLAKR
Q9SIN3		Q9SIN3_ARATH Late embryogenesis abundant domain-containing protein / LEA domain-containing protein OS=Arabidopsis thaliana OX=3702 GN=At2g42560 PE=4	235	GQQAKESVGEGAQKAGSATSEKAQR	NH2-GQQAK<But4C13>ESVGEGAQK<But4C13>AGSATSEK<But4C13>AQR-COOH	25	168	45	NH2			235_GQQAKESVGEGAQKAGSATSEKAQR
Q941R6		MLP31_ARATH MLP-like protein 31 OS=Arabidopsis thaliana OX=3702 GN=MLP31 PE=2	2	ATKMAGAAMNLAKR	Ace-ATK<But4C13>M<Mox*>AGAAM<Mox*>NLAK<But4C13>R-COOH	14	70	45	Ace		Ace	2_ATKMAGAAMNLAKR
Q9SK09		VCL22_ARATH Vicilin-like seed storage protein At2g28490 OS=Arabidopsis thaliana OX=3702 GN=At2g28490 PE=2	247	GPIVYVTEGPQPQP	NH2-GPIVYVTEGPQPQP-COOH	14	54	45	NH2			247_GPIVYVTEGPQPQP
Q9SIN3		Q9SIN3_ARATH Late embryogenesis abundant domain-containing protein / LEA domain-containing protein OS=Arabidopsis thaliana OX=3702 GN=At2g42560 PE=4	235	GQQAKESVGEGAQKAGSATSEKAQR	NH2-GQQAK<But4C13>ESVGEGAQK<But4C13>AGSATSEK<But4C13>AQR-COOH	25	67	45	NH2			235_GQQAKESVGEGAQKAGSATSEKAQR
Q9SIN3		Q9SIN3_ARATH Late embryogenesis abundant domain-containing protein / LEA domain-containing protein OS=Arabidopsis thaliana OX=3702 GN=At2g42560 PE=4	235	GQQAKESVGEGAQKAGSATSEKAQR	NH2-GQQAK<But4C13>ESVGEGAQK<But4C13>AGSATSEK<But4C13>AQR-COOH	25	135	45	NH2			235_GQQAKESVGEGAQKAGSATSEKAQR
Q9SIN3		Q9SIN3_ARATH Late embryogenesis abundant domain-containing protein / LEA domain-containing protein OS=Arabidopsis thaliana OX=3702 GN=At2g42560 PE=4	235	GQQAKESVGEGAQKAGSATSEKAQR	NH2-GQQAK<But4C13>ESVGEGAQK<But4C13>AGSATSEK<But4C13>AQR-COOH	25	97	45	NH2			235_GQQAKESVGEGAQKAGSATSEKAQR
Q9SIN3		Q9SIN3_ARATH Late embryogenesis abundant domain-containing protein / LEA domain-containing protein OS=Arabidopsis thaliana OX=3702 GN=At2g42560 PE=4	235	GQQAKESVGEGAQKAGSATSEKAQR	NH2-GQQAK<But>ESVGEGAQK<But>AGSATSEK<But>AQR-COOH	25	166	45	NH2			235_GQQAKESVGEGAQKAGSATSEKAQR
Q941R6		MLP31_ARATH MLP-like protein 31 OS=Arabidopsis thaliana OX=3702 GN=MLP31 PE=2	2	ATKMAGAAMNLAKR	Ace-ATK<But4C13>M<Mox*>AGAAM<Mox*>NLAK<But4C13>R-COOH	14	47	45	Ace		Ace	2_ATKMAGAAMNLAKR
Q941R6		MLP31_ARATH MLP-like protein 31 OS=Arabidopsis thaliana OX=3702 GN=MLP31 PE=2	2	ATKMAGAAMNLAKR	Ace-ATK<But>M<Mox*>AGAAM<Mox*>NLAK<But>R-COOH	14	69	46	Ace		Ace	2_ATKMAGAAMNLAKR
Q941R6		MLP31_ARATH MLP-like protein 31 OS=Arabidopsis thaliana OX=3702 GN=MLP31 PE=2	2	ATKMAGAAMNLAKR	Ace-ATK<But>M<Mox*>AGAAM<Mox*>NLAK<But>R-COOH	14	57	46	Ace		Ace	2_ATKMAGAAMNLAKR
Q42431		OLEO4_ARATH Oleosin 20.3 kDa OS=Arabidopsis thaliana OX=3702 GN=OL2 PE=2	31	GGYGGYGAGSDYKSR	But-GGYGGYGAGSDYK<But>SR-COOH	15	83	42	But			31_GGYGGYGAGSDYKSR	But
Q941R6		MLP31_ARATH MLP-like protein 31 OS=Arabidopsis thaliana OX=3702 GN=MLP31 PE=2	2	ATKMAGAAMNLAKR	Ace-ATK<But4C13>M<Mox*>AGAAM<Mox*>NLAK<But4C13>R-COOH	14	73	45	Ace		Ace	2_ATKMAGAAMNLAKR
Q9SK09		VCL22_ARATH Vicilin-like seed storage protein At2g28490 OS=Arabidopsis thaliana OX=3702 GN=At2g28490 PE=2	247	GPIVYVTEGPQPQP	NH2-GPIVYVTEGPQPQP-COOH	14	59	45	NH2			247_GPIVYVTEGPQPQP
A0A1P8B543	F4JLA9 (113-135)^AQ96318 (113-135)	A0A1P8B543_ARATH Cruciferin 3 OS=Arabidopsis thaliana OX=3702 GN=CRU3 PE=1	113	CAETFMDSQPMQGQQQGQPWQGR	But4C13-C<Cmm*>AETFM<Mox*>DSQPM<Mox*>QGQQQGQPWQGR-COOH	23	50	33	But4C13			113_CAETFMDSQPMQGQQQGQPWQGR	But
Q941R6		MLP31_ARATH MLP-like protein 31 OS=Arabidopsis thaliana OX=3702 GN=MLP31 PE=2	2	ATKMAGAAMNLAKR	Ace-ATK<But4C13>M<Mox*>AGAAM<Mox*>NLAK<But4C13>R-COOH	14	49	45	Ace		Ace	2_ATKMAGAAMNLAKR
A0A1P8B543	F4JLA9 (113-135)^AQ96318 (113-135)	A0A1P8B543_ARATH Cruciferin 3 OS=Arabidopsis thaliana OX=3702 GN=CRU3 PE=1	113	CAETFMDSQPMQGQQQGQPWQGR	But4C13-C<Cmm*>AETFM<Mox*>DSQPM<Mox*>QGQQQGQPWQGR-COOH	23	39	36	But4C13			113_CAETFMDSQPMQGQQQGQPWQGR	But
Q941R6		MLP31_ARATH MLP-like protein 31 OS=Arabidopsis thaliana OX=3702 GN=MLP31 PE=2	2	ATKMAGAAMNLAKR	Ace-ATK<But>M<Mox*>AGAAM<Mox*>NLAK<But>R-COOH	14	75	46	Ace		Ace	2_ATKMAGAAMNLAKR
A0A1P8B543	F4JLA9 (113-135)^AQ96318 (113-135)	A0A1P8B543_ARATH Cruciferin 3 OS=Arabidopsis thaliana OX=3702 GN=CRU3 PE=1	113	CAETFMDSQPMQGQQQGQPWQGR	But4C13-C<Cmm*>AETFM<Mox*>DSQPM<Mox*>QGQQQGQPWQGR-COOH	23	49	35	But4C13			113_CAETFMDSQPMQGQQQGQPWQGR	But
P15455		CRU1_ARATH 12S seed storage protein CRA1 OS=Arabidopsis thaliana OX=3702 GN=CRA1 PE=1	108	VIPGCAETFQDSSEFQPR	NH2-VIPGC<Cmm*>AETFQDSSEFQPR-COOH	18	94	43	NH2			108_VIPGCAETFQDSSEFQPR
Q9LF98		ALFC8_ARATH Fructose-bisphosphate aldolase 8, cytosolic OS=Arabidopsis thaliana OX=3702 GN=FBA8 PE=1	107	GTVELAGTDGETTTQGLDGLGDR	NH2-GTVELAGTDGETTTQGLDGLGDR-COOH	23	125	44	NH2			107_GTVELAGTDGETTTQGLDGLGDR
Q941R6		MLP31_ARATH MLP-like protein 31 OS=Arabidopsis thaliana OX=3702 GN=MLP31 PE=2	2	ATKMAGAAMNLAKR	Ace-ATK<But4C13>M<Mox*>AGAAM<Mox*>NLAK<But4C13>R-COOH	14	70	45	Ace		Ace	2_ATKMAGAAMNLAKR
Q9SK09		VCL22_ARATH Vicilin-like seed storage protein At2g28490 OS=Arabidopsis thaliana OX=3702 GN=At2g28490 PE=2	247	GPIVYVTEGPQPQP	NH2-GPIVYVTEGPQPQP-COOH	14	73	45	NH2			247_GPIVYVTEGPQPQP
A0A1P8B3K6	Q8RY15 (274-293)	A0A1P8B3K6_ARATH CAP160 protein OS=Arabidopsis thaliana OX=3702 GN=At4g25580 PE=4	274	VTDPTGKGAGEQPSVAAFGR	NH2-VTDPTGK<But4C13>GAGEQPSVAAFGR-COOH	20	86	46	NH2			274_VTDPTGKGAGEQPSVAAFGR
Q9SIN3		Q9SIN3_ARATH Late embryogenesis abundant domain-containing protein / LEA domain-containing protein OS=Arabidopsis thaliana OX=3702 GN=At2g42560 PE=4	466	ADTVVGYTAR	But4C13-ADTVVGYTAR-COOH	10	54	45	But4C13			466_ADTVVGYTAR	But
Q42431		OLEO4_ARATH Oleosin 20.3 kDa OS=Arabidopsis thaliana OX=3702 GN=OL2 PE=2	32	GYGGYGAGSDYKSR	But-GYGGYGAGSDYK<But>SR-COOH	14	79	42	But			32_GYGGYGAGSDYKSR	But
Q42431		OLEO4_ARATH Oleosin 20.3 kDa OS=Arabidopsis thaliana OX=3702 GN=OL2 PE=2	32	GYGGYGAGSDYKSR	But4C13-GYGGYGAGSDYK<But4C13>SR-COOH	14	82	43	But4C13			32_GYGGYGAGSDYKSR	But
Q941R6		MLP31_ARATH MLP-like protein 31 OS=Arabidopsis thaliana OX=3702 GN=MLP31 PE=2	2	ATKMAGAAMNLAKR	Ace-ATK<But4C13>M<Mox*>AGAAM<Mox*>NLAK<But4C13>R-COOH	14	59	45	Ace		Ace	2_ATKMAGAAMNLAKR
P15455	F4K8S2 (96-105)	CRU1_ARATH 12S seed storage protein CRA1 OS=Arabidopsis thaliana OX=3702 GN=CRA1 PE=1	283	GLEETICSAR	But-GLEETIC<Cmm*>SAR-COOH	10	57	44	But			283_GLEETICSAR	But
Q9ZWA9		CRU4_ARATH 12S seed storage protein CRD OS=Arabidopsis thaliana OX=3702 GN=CRD PE=1	434	IKFSQQETMLSMTPSSSS	NH2-IK<But4C13>FSQQETM<Mox*>LSM<Mox*>TPSSSS-COOH	18	61	44	NH2			434_IKFSQQETMLSMTPSSSS
Q941R6		MLP31_ARATH MLP-like protein 31 OS=Arabidopsis thaliana OX=3702 GN=MLP31 PE=2	2	ATKMAGAAMNLAKR	Ace-ATK<But4C13>M<Mox*>AGAAM<Mox*>NLAK<But4C13>R-COOH	14	66	45	Ace		Ace	2_ATKMAGAAMNLAKR
Q9SK09		VCL22_ARATH Vicilin-like seed storage protein At2g28490 OS=Arabidopsis thaliana OX=3702 GN=At2g28490 PE=2	247	GPIVYVTEGPQPQP	NH2-GPIVYVTEGPQPQP-COOH	14	56	45	NH2			247_GPIVYVTEGPQPQP
F4J683	F4K0U3 (1-12)^AO24412 (1-12)^AQ9C774 (1-12)	F4J683_ARATH Mov34/MPN/PAD-1 family protein OS=Arabidopsis thaliana OX=3702 GN=MEE34 PE=4	1	MDVIKTQQISAR	Ace-M<Mox*>DVIK<But4C13>TQQISAR-COOH	12	76	45	Ace		Ace	1_MDVIKTQQISAR
F4J683	F4K0U3 (1-12)^AO24412 (1-12)^AQ9C774 (1-12)	F4J683_ARATH Mov34/MPN/PAD-1 family protein OS=Arabidopsis thaliana OX=3702 GN=MEE34 PE=4	1	MDVIKTQQISAR	Ace-M<Mox*>DVIK<But>TQQISAR-COOH	12	71	46	Ace		Ace	1_MDVIKTQQISAR
Q9SIN3		Q9SIN3_ARATH Late embryogenesis abundant domain-containing protein / LEA domain-containing protein OS=Arabidopsis thaliana OX=3702 GN=At2g42560 PE=4	235	GQQAKESVGEGAQKAGSATSEKAQR	NH2-GQQAK<But4C13>ESVGEGAQK<But4C13>AGSATSEK<But4C13>AQR-COOH	25	66	45	NH2			235_GQQAKESVGEGAQKAGSATSEKAQR
P15455		CRU1_ARATH 12S seed storage protein CRA1 OS=Arabidopsis thaliana OX=3702 GN=CRA1 PE=1	108	VIPGCAETFQDSSEFQPR	NH2-VIPGC<Cmm*>AETFQDSSEFQPR-COOH	18	132	42	NH2			108_VIPGCAETFQDSSEFQPR
P15455		CRU1_ARATH 12S seed storage protein CRA1 OS=Arabidopsis thaliana OX=3702 GN=CRA1 PE=1	108	VIPGCAETFQDSSEFQPR	NH2-VIPGC<Cmm*>AETFQDSSEFQPR-COOH	18	119	42	NH2			108_VIPGCAETFQDSSEFQPR
Q9LZ82		BTR1_ARATH Protein BTR1 OS=Arabidopsis thaliana OX=3702 GN=BTR1 PE=1	1	MESTESYAAGSPEELAKR	Ace-M<Mox*>ESTESYAAGSPEELAK<But4C13>R-COOH	18	120	43	Ace		Ace	1_MESTESYAAGSPEELAKR
F4J912	P49227 (112-138)^AQ8LBI1 (112-138)	F4J912_ARATH Ribosomal protein L5 OS=Arabidopsis thaliana OX=3702 GN=ATL5 PE=1	1	MLEMDDEYEGNVEATGEDFSVEPTDSR	NH2-M<Mox*>LEM<Mox*>DDEYEGNVEATGEDFSVEPTDSR-COOH	27	59	31	NH2			1_MLEMDDEYEGNVEATGEDFSVEPTDSR
F4J912	P49227 (112-138)^AQ8LBI1 (112-138)	F4J912_ARATH Ribosomal protein L5 OS=Arabidopsis thaliana OX=3702 GN=ATL5 PE=1	1	MLEMDDEYEGNVEATGEDFSVEPTDSR	NH2-M<Mox*>LEM<Mox*>DDEYEGNVEATGEDFSVEPTDSR-COOH	27	81	30	NH2			1_MLEMDDEYEGNVEATGEDFSVEPTDSR
F4J912	P49227 (112-138)^AQ8LBI1 (112-138)	F4J912_ARATH Ribosomal protein L5 OS=Arabidopsis thaliana OX=3702 GN=ATL5 PE=1	1	MLEMDDEYEGNVEATGEDFSVEPTDSR	NH2-M<Mox*>LEM<Mox*>DDEYEGNVEATGEDFSVEPTDSR-COOH	27	86	32	NH2			1_MLEMDDEYEGNVEATGEDFSVEPTDSR
F4J912	P49227 (112-138)^AQ8LBI1 (112-138)	F4J912_ARATH Ribosomal protein L5 OS=Arabidopsis thaliana OX=3702 GN=ATL5 PE=1	1	MLEMDDEYEGNVEATGEDFSVEPTDSR	NH2-M<Mox*>LEM<Mox*>DDEYEGNVEATGEDFSVEPTDSR-COOH	27	87	31	NH2			1_MLEMDDEYEGNVEATGEDFSVEPTDSR
Q941R6		MLP31_ARATH MLP-like protein 31 OS=Arabidopsis thaliana OX=3702 GN=MLP31 PE=2	2	ATKMAGAAMNLAKR	Ace-ATK<But4C13>M<Mox*>AGAAM<Mox*>NLAK<But4C13>R-COOH	14	53	45	Ace		Ace	2_ATKMAGAAMNLAKR
P15455	F4K8S2 (96-105)	CRU1_ARATH 12S seed storage protein CRA1 OS=Arabidopsis thaliana OX=3702 GN=CRA1 PE=1	283	GLEETICSAR	But-GLEETIC<Cmm*>SAR-COOH	10	57	44	But			283_GLEETICSAR	But
Q8H0U4		TNPO1_ARATH Transportin-1 OS=Arabidopsis thaliana OX=3702 GN=TRN1 PE=1	2	AATAVVWQPR	Ace-AATAVVWQPR-COOH	10	70	44	Ace		Ace	2_AATAVVWQPR
Q9ZWA9		CRU4_ARATH 12S seed storage protein CRD OS=Arabidopsis thaliana OX=3702 GN=CRD PE=1	434	IKFSQQETMLSMTPS	NH2-IK<But4C13>FSQQETM<Mox*>LSM<Mox*>TPS-COOH	15	50	45	NH2			434_IKFSQQETMLSMTPS
P25696		ENO2_ARATH Bifunctional enolase 2/transcriptional activator OS=Arabidopsis thaliana OX=3702 GN=ENO2 PE=1	2	ATITVVKAR	Ace-ATITVVK<But4C13>AR-COOH	9	47	41	Ace		Ace	2_ATITVVKAR
Q94II5	Q9SIJ8 (1-13)	Q94II5_ARATH Adenine nucleotide alpha hydrolases-like superfamily protein OS=Arabidopsis thaliana OX=3702 GN=RD2 PE=1	1	MEALPEDEEYSFR	Ace-M<Mox*>EALPEDEEYSFR-COOH	13	38	37	Ace		Ace	1_MEALPEDEEYSFR
Q94EG6		Y5224_ARATH Uncharacterized protein At5g02240 OS=Arabidopsis thaliana OX=3702 GN=At5g02240 PE=1	157	KAEQYLADSGTPY	NH2-K<But4C13>AEQYLADSGTPY-COOH	13	53	45	NH2			157_KAEQYLADSGTPY
P15456		CRU2_ARATH 12S seed storage protein CRB OS=Arabidopsis thaliana OX=3702 GN=CRB PE=1	201	KQQKQNNIFN	NH2-K<But>QQK<But>QNNIFN-COOH	10	49	46	NH2			201_KQQKQNNIFN
Q8H0U4		TNPO1_ARATH Transportin-1 OS=Arabidopsis thaliana OX=3702 GN=TRN1 PE=1	2	AATAVVWQPR	Ace-AATAVVWQPR-COOH	10	79	44	Ace		Ace	2_AATAVVWQPR
Q9ZWA9		CRU4_ARATH 12S seed storage protein CRD OS=Arabidopsis thaliana OX=3702 GN=CRD PE=1	434	IKFSQQETMLSMTPS	NH2-IK<But4C13>FSQQETM<Mox*>LSM<Mox*>TPS-COOH	15	62	45	NH2			434_IKFSQQETMLSMTPS
P15455		CRU1_ARATH 12S seed storage protein CRA1 OS=Arabidopsis thaliana OX=3702 GN=CRA1 PE=1	100	KGRGLMGKVIPGCAETFQDSSEFQPR	NH2-K<But>GRGLM<Mox*>GK<But>VIPGC<Cmm*>AETFQDSSEFQPR-COOH	26	46	44	NH2			100_KGRGLMGKVIPGCAETFQDSSEFQPR
P15456		CRU2_ARATH 12S seed storage protein CRB OS=Arabidopsis thaliana OX=3702 GN=CRB PE=1	201	KQQKQNNIFN	NH2-K<But>QQK<But>QNNIFN-COOH	10	46	45	NH2			201_KQQKQNNIFN
Q8H0U4		TNPO1_ARATH Transportin-1 OS=Arabidopsis thaliana OX=3702 GN=TRN1 PE=1	2	AATAVVWQPR	Ace-AATAVVWQPR-COOH	10	67	44	Ace		Ace	2_AATAVVWQPR
Q9SIN3		Q9SIN3_ARATH Late embryogenesis abundant domain-containing protein / LEA domain-containing protein OS=Arabidopsis thaliana OX=3702 GN=At2g42560 PE=4	120	ANAQQKSMDSIKAAEER	NH2-ANAQQK<But4C13>SM<Mox*>DSIK<But4C13>AAEER-COOH	17	90	45	NH2			120_ANAQQKSMDSIKAAEER
Q9SIN3		Q9SIN3_ARATH Late embryogenesis abundant domain-containing protein / LEA domain-containing protein OS=Arabidopsis thaliana OX=3702 GN=At2g42560 PE=4	120	ANAQQKSMDSIKAAEER	NH2-ANAQQK<But>SM<Mox*>DSIK<But>AAEER-COOH	17	94	45	NH2			120_ANAQQKSMDSIKAAEER
Q9SIN3		Q9SIN3_ARATH Late embryogenesis abundant domain-containing protein / LEA domain-containing protein OS=Arabidopsis thaliana OX=3702 GN=At2g42560 PE=4	120	ANAQQKSMDSIKAAEER	NH2-ANAQQK<But4C13>SM<Mox*>DSIK<But4C13>AAEER-COOH	17	107	45	NH2			120_ANAQQKSMDSIKAAEER
Q9SIN3		Q9SIN3_ARATH Late embryogenesis abundant domain-containing protein / LEA domain-containing protein OS=Arabidopsis thaliana OX=3702 GN=At2g42560 PE=4	120	ANAQQKSMDSIKAAEER	NH2-ANAQQK<But>SM<Mox*>DSIK<But>AAEER-COOH	17	96	45	NH2			120_ANAQQKSMDSIKAAEER
Q9SIN3		Q9SIN3_ARATH Late embryogenesis abundant domain-containing protein / LEA domain-containing protein OS=Arabidopsis thaliana OX=3702 GN=At2g42560 PE=4	120	ANAQQKSMDSIKAAEER	NH2-ANAQQK<But>SM<Mox*>DSIK<But>AAEER-COOH	17	107	45	NH2			120_ANAQQKSMDSIKAAEER
Q9SIN3		Q9SIN3_ARATH Late embryogenesis abundant domain-containing protein / LEA domain-containing protein OS=Arabidopsis thaliana OX=3702 GN=At2g42560 PE=4	120	ANAQQKSMDSIKAAEER	NH2-ANAQQK<But4C13>SM<Mox*>DSIK<But4C13>AAEER-COOH	17	107	45	NH2			120_ANAQQKSMDSIKAAEER
O81822		HS177_ARATH 17.7 kDa class II heat shock protein OS=Arabidopsis thaliana OX=3702 GN=HSP17.7 PE=2	17	MLEAPEEQTEKTR	But4C13-M<Mox*>LEAPEEQTEK<But4C13>TR-COOH	13	52	45	But4C13			17_MLEAPEEQTEKTR	But
Q9SIN3		Q9SIN3_ARATH Late embryogenesis abundant domain-containing protein / LEA domain-containing protein OS=Arabidopsis thaliana OX=3702 GN=At2g42560 PE=4	120	ANAQQKSMDSIKAAEER	NH2-ANAQQK<But4C13>SM<Mox*>DSIK<But4C13>AAEER-COOH	17	94	45	NH2			120_ANAQQKSMDSIKAAEER
P15455	F4K8S2 (96-105)	CRU1_ARATH 12S seed storage protein CRA1 OS=Arabidopsis thaliana OX=3702 GN=CRA1 PE=1	283	GLEETICSAR	But-GLEETIC<Cmm*>SAR-COOH	10	57	44	But			283_GLEETICSAR	But
P15455	F4K8S2 (96-105)	CRU1_ARATH 12S seed storage protein CRA1 OS=Arabidopsis thaliana OX=3702 GN=CRA1 PE=1	283	GLEETICSAR	But-GLEETIC<Cmm*>SAR-COOH	10	63	44	But			283_GLEETICSAR	But
Q9SIN3		Q9SIN3_ARATH Late embryogenesis abundant domain-containing protein / LEA domain-containing protein OS=Arabidopsis thaliana OX=3702 GN=At2g42560 PE=4	490	GGEEEKQPGFVSGAR	But-GGEEEK<But>QPGFVSGAR-COOH	15	75	45	But			490_GGEEEKQPGFVSGAR	But
P15456		CRU2_ARATH 12S seed storage protein CRB OS=Arabidopsis thaliana OX=3702 GN=CRB PE=1	107	AETFMESPVFGEGQGQGQSQGFR	NH2-AETFM<Mox*>ESPVFGEGQGQGQSQGFR-COOH	23	101	40	NH2			107_AETFMESPVFGEGQGQGQSQGFR
P15455	F4K8S2 (96-105)	CRU1_ARATH 12S seed storage protein CRA1 OS=Arabidopsis thaliana OX=3702 GN=CRA1 PE=1	283	GLEETICSAR	But-GLEETIC<Cmm*>SAR-COOH	10	64	44	But			283_GLEETICSAR	But
A0A2H1ZEH9	Q8H0X6 (35-57)	A0A2H1ZEH9_ARATH Cysteine proteinase inhibitor OS=Arabidopsis thaliana OX=3702 GN=CYSB PE=1	2	ALVGGVGDVPANQNSGEVESLAR	NH2-ALVGGVGDVPANQNSGEVESLAR-COOH	23	96	46	NH2			2_ALVGGVGDVPANQNSGEVESLAR
Q9SIN3		Q9SIN3_ARATH Late embryogenesis abundant domain-containing protein / LEA domain-containing protein OS=Arabidopsis thaliana OX=3702 GN=At2g42560 PE=4	491	GEEEKQPGFVSGAR	But4C13-GEEEK<But4C13>QPGFVSGAR-COOH	14	73	45	But4C13			491_GEEEKQPGFVSGAR	But
F4JQG6		VCL43_ARATH Vicilin-like seed storage protein At4g36700 OS=Arabidopsis thaliana OX=3702 GN=At4g36700 PE=3	388	NNEPQFLAGEDSALR	NH2-NNEPQFLAGEDSALR-COOH	15	75	44	NH2			388_NNEPQFLAGEDSALR
Q9LF88		Y3304_ARATH Late embryogenesis abundant protein At3g53040 OS=Arabidopsis thaliana OX=3702 GN=At3g53040 PE=2	83	GADIASEKAAGMR	But-GADIASEK<But>AAGM<Mox*>R-COOH	13	52	45	But			83_GADIASEKAAGMR	But
Q9LF88		Y3304_ARATH Late embryogenesis abundant protein At3g53040 OS=Arabidopsis thaliana OX=3702 GN=At3g53040 PE=2	83	GADIASEKAAGMR	But4C13-GADIASEK<But4C13>AAGM<Mox*>R-COOH	13	55	45	But4C13			83_GADIASEKAAGMR	But
Q93VG5	Q9FIF3 (32-45)	RS81_ARATH 40S ribosomal protein S8-1 OS=Arabidopsis thaliana OX=3702 GN=RPS8A PE=1	32	QPANTKLSSNKTVR	NH2-QPANTK<But4C13>LSSNK<But4C13>TVR-COOH	14	60	43	NH2			32_QPANTKLSSNKTVR
Q93VG5	Q9FIF3 (32-45)	RS81_ARATH 40S ribosomal protein S8-1 OS=Arabidopsis thaliana OX=3702 GN=RPS8A PE=1	32	QPANTKLSSNKTVR	NH2-Q<Pyr>PANTK<But>LSSNK<But>TVR-COOH	14	57	44	NH2	Q<Pyr>		32_QPANTKLSSNKTVR
Q9LF88		Y3304_ARATH Late embryogenesis abundant protein At3g53040 OS=Arabidopsis thaliana OX=3702 GN=At3g53040 PE=2	449	EADQMTGQTFNDVGEIDDEEKVR	NH2-EADQM<Mox*>TGQTFNDVGEIDDEEK<But4C13>VR-COOH	23	136	41	NH2			449_EADQMTGQTFNDVGEIDDEEKVR
P15459		2SS3_ARATH 2S seed storage protein 3 OS=Arabidopsis thaliana OX=3702 GN=AT2S3 PE=1	102	EEPVCVCPTLKQAAR	NH2-EEPVC<Cmm*>VC<Cmm*>PTLK<But4C13>QAAR-COOH	15	89	46	NH2			102_EEPVCVCPTLKQAAR
P15459		2SS3_ARATH 2S seed storage protein 3 OS=Arabidopsis thaliana OX=3702 GN=AT2S3 PE=1	102	EEPVCVCPTLKQAAR	NH2-EEPVC<Cmm*>VC<Cmm*>PTLK<But4C13>QAAR-COOH	15	89	45	NH2			102_EEPVCVCPTLKQAAR
Q9LF88		Y3304_ARATH Late embryogenesis abundant protein At3g53040 OS=Arabidopsis thaliana OX=3702 GN=At3g53040 PE=2	449	EADQMTGQTFNDVGEIDDEEKVR	NH2-EADQM<Mox*>TGQTFNDVGEIDDEEK<But4C13>VR-COOH	23	120	40	NH2			449_EADQMTGQTFNDVGEIDDEEKVR
Q9FFN4		BGAL6_ARATH Beta-galactosidase 6 OS=Arabidopsis thaliana OX=3702 GN=BGAL6 PE=2	26	ATAAKGVTYDGR	But4C13-ATAAK<But4C13>GVTYDGR-COOH	12	66	45	But4C13			26_ATAAKGVTYDGR	But
Q9SKI2		VPS2A_ARATH Vacuolar protein sorting-associated protein 2 homolog 1 OS=Arabidopsis thaliana OX=3702 GN=VPS2.1 PE=1	1	MMNSIFGKR	Ace-M<Mox*>M<Mox*>NSIFGK<But4C13>R-COOH	9	56	45	Ace		Ace	1_MMNSIFGKR
F4J573		F4J573_ARATH Late embryogenesis abundant protein (LEA) family protein OS=Arabidopsis thaliana OX=3702 GN=At3g17520 PE=4	287	VKESLTDDDAEL	NH2-VK<But4C13>ESLTDDDAEL-COOH	12	63	45	NH2			287_VKESLTDDDAEL
F4JLA9	Q96318 (463-471)	F4JLA9_ARATH Cruciferin 3 OS=Arabidopsis thaliana OX=3702 GN=CRU3 PE=1	392	AMISTLAGR	But4C13-AM<Mox*>ISTLAGR-COOH	9	48	45	But4C13			392_AMISTLAGR	But
Q9SFU7		Q9SFU7_ARATH AT3g07170/T1B9_17 OS=Arabidopsis thaliana OX=3702 GN=T1B9.17 PE=2	1	MYADKLEAESGSR	Ace-M<Mox*>YADK<But4C13>LEAESGSR-COOH	13	82	43	Ace		Ace	1_MYADKLEAESGSR
F4J573		F4J573_ARATH Late embryogenesis abundant protein (LEA) family protein OS=Arabidopsis thaliana OX=3702 GN=At3g17520 PE=4	287	VKESLTDDDAEL	NH2-VK<But4C13>ESLTDDDAEL-COOH	12	60	45	NH2			287_VKESLTDDDAEL
P15455	F4K8S2 (96-105)	CRU1_ARATH 12S seed storage protein CRA1 OS=Arabidopsis thaliana OX=3702 GN=CRA1 PE=1	283	GLEETICSAR	But-GLEETIC<Cmm*>SAR-COOH	10	63	44	But			283_GLEETICSAR	But
A0A2H1ZEH9	Q8H0X6 (39-57)	A0A2H1ZEH9_ARATH Cysteine proteinase inhibitor OS=Arabidopsis thaliana OX=3702 GN=CYSB PE=1	6	GVGDVPANQNSGEVESLAR	But4C13-GVGDVPANQNSGEVESLAR-COOH	19	67	45	But4C13			6_GVGDVPANQNSGEVESLAR	But
Q9LF88		Y3304_ARATH Late embryogenesis abundant protein At3g53040 OS=Arabidopsis thaliana OX=3702 GN=At3g53040 PE=2	449	EADQMTGQTFNDVGEIDDEEKVR	NH2-EADQM<Mox*>TGQTFNDVGEIDDEEK<But4C13>VR-COOH	23	118	40	NH2			449_EADQMTGQTFNDVGEIDDEEKVR
F4J573		F4J573_ARATH Late embryogenesis abundant protein (LEA) family protein OS=Arabidopsis thaliana OX=3702 GN=At3g17520 PE=4	287	VKESLTDDDAEL	NH2-VK<But4C13>ESLTDDDAEL-COOH	12	71	45	NH2			287_VKESLTDDDAEL
P15455		CRU1_ARATH 12S seed storage protein CRA1 OS=Arabidopsis thaliana OX=3702 GN=CRA1 PE=1	106	GKVIPGCAETFQDSSEFQPR	NH2-GK<But>VIPGC<Cmm*>AETFQDSSEFQPR-COOH	20	70	44	NH2			106_GKVIPGCAETFQDSSEFQPR
Q9SKI2		VPS2A_ARATH Vacuolar protein sorting-associated protein 2 homolog 1 OS=Arabidopsis thaliana OX=3702 GN=VPS2.1 PE=1	1	MMNSIFGKR	Ace-M<Mox*>M<Mox*>NSIFGK<But4C13>R-COOH	9	56	44	Ace		Ace	1_MMNSIFGKR
F4J573		F4J573_ARATH Late embryogenesis abundant protein (LEA) family protein OS=Arabidopsis thaliana OX=3702 GN=At3g17520 PE=4	287	VKESLTDDDAEL	NH2-VK<But4C13>ESLTDDDAEL-COOH	12	65	45	NH2			287_VKESLTDDDAEL
P15455	F4K8S2 (96-105)	CRU1_ARATH 12S seed storage protein CRA1 OS=Arabidopsis thaliana OX=3702 GN=CRA1 PE=1	283	GLEETICSAR	But-GLEETIC<Cmm*>SAR-COOH	10	63	44	But			283_GLEETICSAR	But
F4J573		F4J573_ARATH Late embryogenesis abundant protein (LEA) family protein OS=Arabidopsis thaliana OX=3702 GN=At3g17520 PE=4	287	VKESLTDDDAEL	NH2-VK<But4C13>ESLTDDDAEL-COOH	12	71	45	NH2			287_VKESLTDDDAEL
F4J8L7	Q9LHL7 (2-10)	F4J8L7_ARATH Aha1 domain-containing protein OS=Arabidopsis thaliana OX=3702 GN=MEC18.18 PE=1	2	AKFGEGDKR	Ace-AK<But>FGEGDK<But>R-COOH	9	49	46	Ace		Ace	2_AKFGEGDKR
F4J573		F4J573_ARATH Late embryogenesis abundant protein (LEA) family protein OS=Arabidopsis thaliana OX=3702 GN=At3g17520 PE=4	287	VKESLTDDDAEL	NH2-VK<But4C13>ESLTDDDAEL-COOH	12	78	45	NH2			287_VKESLTDDDAEL
A0A1P8B7I6	F4JQF1 (280-301)	A0A1P8B7I6_ARATH Late embryogenesis abundant (LEA) protein OS=Arabidopsis thaliana OX=3702 GN=AP22.17 PE=4	286	AVDYAKDKANDAYESGSEAAGR	NH2-AVDYAK<But4C13>DK<But4C13>ANDAYESGSEAAGR-COOH	22	120	43	NH2			286_AVDYAKDKANDAYESGSEAAGR
A0A1P8B7I6	F4JQF1 (280-301)	A0A1P8B7I6_ARATH Late embryogenesis abundant (LEA) protein OS=Arabidopsis thaliana OX=3702 GN=AP22.17 PE=4	286	AVDYAKDKANDAYESGSEAAGR	NH2-AVDYAK<But4C13>DK<But4C13>ANDAYESGSEAAGR-COOH	22	123	44	NH2			286_AVDYAKDKANDAYESGSEAAGR
Q7DLG4		Q7DLG4_ARATH Arginyl-tRNA synthetase OS=Arabidopsis thaliana OX=3702 GN=emb1027 PE=1	2	AANEEFTGNLKR	Ace-AANEEFTGNLK<But>R-COOH	12	91	45	Ace		Ace	2_AANEEFTGNLKR
A0A1P8B7I6	F4JQF1 (280-301)	A0A1P8B7I6_ARATH Late embryogenesis abundant (LEA) protein OS=Arabidopsis thaliana OX=3702 GN=AP22.17 PE=4	286	AVDYAKDKANDAYESGSEAAGR	NH2-AVDYAK<But4C13>DK<But4C13>ANDAYESGSEAAGR-COOH	22	124	43	NH2			286_AVDYAKDKANDAYESGSEAAGR
P15455	F4K8S2 (96-105)	CRU1_ARATH 12S seed storage protein CRA1 OS=Arabidopsis thaliana OX=3702 GN=CRA1 PE=1	283	GLEETICSAR	But-GLEETIC<Cmm*>SAR-COOH	10	62	44	But			283_GLEETICSAR	But
Q9LF88		Y3304_ARATH Late embryogenesis abundant protein At3g53040 OS=Arabidopsis thaliana OX=3702 GN=At3g53040 PE=2	449	EADQMTGQTFNDVGEIDDEEKVR	NH2-EADQM<Mox*>TGQTFNDVGEIDDEEK<But4C13>VR-COOH	23	102	39	NH2			449_EADQMTGQTFNDVGEIDDEEKVR
Q9XFK7		MFT_ARATH Protein MOTHER of FT and TFL1 OS=Arabidopsis thaliana OX=3702 GN=MFT PE=1	2	AASVDPLVVGR	Ace-AASVDPLVVGR-COOH	11	92	44	Ace		Ace	2_AASVDPLVVGR
Q9C524		SCRK6_ARATH Probable fructokinase-6, chloroplastic OS=Arabidopsis thaliana OX=3702 GN=At1g66430 PE=2	97	GAPANVAVGIAR	But-GAPANVAVGIAR-COOH	12	57	44	But			97_GAPANVAVGIAR	But
F4J573		F4J573_ARATH Late embryogenesis abundant protein (LEA) family protein OS=Arabidopsis thaliana OX=3702 GN=At3g17520 PE=4	86	KAEEAVGAAKEK	NH2-K<But4C13>AEEAVGAAK<But4C13>EK<But4C13>-COOH	12	49	43	NH2			86_KAEEAVGAAKEK
Q9SLA8		FABI_ARATH Enoyl-[acyl-carrier-protein] reductase [NADH], chloroplastic OS=Arabidopsis thaliana OX=3702 GN=MOD1 PE=1	276	GGMSSAKAALESDTR	But-GGM<Mox*>SSAK<But>AALESDTR-COOH	15	74	44	But			276_GGMSSAKAALESDTR	But
O23298		O23298_ARATH AT4g14420/dl3250c OS=Arabidopsis thaliana OX=3702 GN=dl3250c PE=2	150	KKAPKAKAN	NH2-K<But4C13>K<But4C13>APK<But4C13>AK<But4C13>AN-COOH	9	40	35	NH2			150_KKAPKAKAN
A0A2H1ZEH9		A0A2H1ZEH9_ARATH Cysteine proteinase inhibitor OS=Arabidopsis thaliana OX=3702 GN=CYSB PE=1	2	ALVGGVGDVPANQNSGEVESLAR	Ace-ALVGGVGDVPANQNSGEVESLAR-COOH	23	48	45	Ace		Ace	2_ALVGGVGDVPANQNSGEVESLAR
O23267	Q9SUQ9 (2-18)^AQ9SUR0 (2-18)^AQ9ZVF3 (2-18)	O23267_ARATH AT4g14060/dl3070w OS=Arabidopsis thaliana OX=3702 GN=dl3070w PE=2	2	ATSGTYVTEVPLKGSAE	Ace-ATSGTYVTEVPLK<But>GSAE-COOH	17	69	46	Ace		Ace	2_ATSGTYVTEVPLKGSAE
B3H6B0	Q9FIB6 (2-13)	B3H6B0_ARATH 26S proteasome regulatory subunit, putative (RPN5) OS=Arabidopsis thaliana OX=3702 GN=EMB2107 PE=4	2	GDSGKLEATIDR	Ace-GDSGK<But>LEATIDR-COOH	12	55	45	Ace		Ace	2_GDSGKLEATIDR
F4J573		F4J573_ARATH Late embryogenesis abundant protein (LEA) family protein OS=Arabidopsis thaliana OX=3702 GN=At3g17520 PE=4	287	VKESLTDDDAEL	NH2-VK<But4C13>ESLTDDDAEL-COOH	12	57	45	NH2			287_VKESLTDDDAEL
Q9SIN3		Q9SIN3_ARATH Late embryogenesis abundant domain-containing protein / LEA domain-containing protein OS=Arabidopsis thaliana OX=3702 GN=At2g42560 PE=4	516	GSEKDVYGYGAK	NH2-GSEK<But4C13>DVYGYGAK<But4C13>-COOH	12	48	45	NH2			516_GSEKDVYGYGAK
Q8VYL3		APA2_ARATH Aspartic proteinase A2 OS=Arabidopsis thaliana OX=3702 GN=APA2 PE=2	502	FGNEQVGFAEAV	NH2-FGNEQVGFAEAV-COOH	12	51	44	NH2			502_FGNEQVGFAEAV
Q8RU07		Q8RU07_ARATH EMBRYO DEFECTIVE 3147 OS=Arabidopsis thaliana OX=3702 GN=EMB3147 PE=2	382	VDKSASFENISA	NH2-VDK<But>SASFENISA-COOH	12	50	45	NH2			382_VDKSASFENISA
Q9XFK7		MFT_ARATH Protein MOTHER of FT and TFL1 OS=Arabidopsis thaliana OX=3702 GN=MFT PE=1	2	AASVDPLVVGR	Ace-AASVDPLVVGR-COOH	11	74	44	Ace		Ace	2_AASVDPLVVGR
Q3EDG6		Q3EDG6_ARATH Expressed protein OS=Arabidopsis thaliana OX=3702 GN=At1g07985 PE=2	2	AVVEEPILSR	Ace-AVVEEPILSR-COOH	10	50	44	Ace		Ace	2_AVVEEPILSR
A0A1P8B0Y5	O64471 (1-15)	A0A1P8B0Y5_ARATH Metaxin-like protein OS=Arabidopsis thaliana OX=3702 GN=At2g19080 PE=1	1	MEGDQETNVYTLVAR	Ace-M<Mox*>EGDQETNVYTLVAR-COOH	15	99	43	Ace		Ace	1_MEGDQETNVYTLVAR
P15456		CRU2_ARATH 12S seed storage protein CRB OS=Arabidopsis thaliana OX=3702 GN=CRB PE=1	270	GLEETLCTMR	But-GLEETLC<Cmm*>TM<Mox*>R-COOH	10	52	42	But			270_GLEETLCTMR	But
Q9SIN3		Q9SIN3_ARATH Late embryogenesis abundant domain-containing protein / LEA domain-containing protein OS=Arabidopsis thaliana OX=3702 GN=At2g42560 PE=4	66	PVSDEGEGETKMKR	But-PVSDEGEGETK<But>M<Mox*>K<But>R-COOH	14	88	44	But			66_PVSDEGEGETKMKR	But
A8MQA1	P41127 (104-114)	A8MQA1_ARATH 60S ribosomal protein L13 OS=Arabidopsis thaliana OX=3702 GN=BBC1 PE=1	104	SLEGLQTNVQR	But4C13-SLEGLQTNVQR-COOH	11	65	45	But4C13			104_SLEGLQTNVQR	But
Q9SIN3		Q9SIN3_ARATH Late embryogenesis abundant domain-containing protein / LEA domain-containing protein OS=Arabidopsis thaliana OX=3702 GN=At2g42560 PE=4	237	QAKESVGEGAQKAGSATSEKAQR	NH2-Q<Pyr>AK<But4C13>ESVGEGAQK<But4C13>AGSATSEK<But4C13>AQR-COOH	23	85	45	NH2	Q<Pyr>		237_QAKESVGEGAQKAGSATSEKAQR
P15455		CRU1_ARATH 12S seed storage protein CRA1 OS=Arabidopsis thaliana OX=3702 GN=CRA1 PE=1	112	CAETFQDSSEFQPR	But4C13-C<Cmm*>AETFQDSSEFQPR-COOH	14	108	39	But4C13			112_CAETFQDSSEFQPR	But
A8MQA1	P41127 (104-114)	A8MQA1_ARATH 60S ribosomal protein L13 OS=Arabidopsis thaliana OX=3702 GN=BBC1 PE=1	104	SLEGLQTNVQR	But4C13-SLEGLQTNVQR-COOH	11	81	46	But4C13			104_SLEGLQTNVQR	But
P15456		CRU2_ARATH 12S seed storage protein CRB OS=Arabidopsis thaliana OX=3702 GN=CRB PE=1	422	GYQISPEEAKR	But-GYQISPEEAK<But>R-COOH	11	68	46	But			422_GYQISPEEAKR	But
Q9SIN3		Q9SIN3_ARATH Late embryogenesis abundant domain-containing protein / LEA domain-containing protein OS=Arabidopsis thaliana OX=3702 GN=At2g42560 PE=4	237	QAKESVGEGAQKAGSATSEKAQR	NH2-Q<Pyr>AK<But4C13>ESVGEGAQK<But4C13>AGSATSEK<But4C13>AQR-COOH	23	79	45	NH2	Q<Pyr>		237_QAKESVGEGAQKAGSATSEKAQR
Q9SIN3		Q9SIN3_ARATH Late embryogenesis abundant domain-containing protein / LEA domain-containing protein OS=Arabidopsis thaliana OX=3702 GN=At2g42560 PE=4	523	GYGAKGIPGEGR	But4C13-GYGAK<But4C13>GIPGEGR-COOH	12	62	45	But4C13			523_GYGAKGIPGEGR	But
Q3E8H9	Q9FKV7 (104-121)	Q3E8H9_ARATH Late embryogenesis abundant protein (LEA) family protein OS=Arabidopsis thaliana OX=3702 GN=At5g44310 PE=4	68	TKDYAEQTKNKVNEGASR	NH2-TK<But4C13>DYAEQTK<But4C13>NK<But4C13>VNEGASR-COOH	18	108	46	NH2			68_TKDYAEQTKNKVNEGASR
Q3E8H9	Q9FKV7 (104-121)	Q3E8H9_ARATH Late embryogenesis abundant protein (LEA) family protein OS=Arabidopsis thaliana OX=3702 GN=At5g44310 PE=4	68	TKDYAEQTKNKVNEGASR	NH2-TK<But>DYAEQTK<But>NK<But>VNEGASR-COOH	18	116	45	NH2			68_TKDYAEQTKNKVNEGASR
Q8VYC9		Q8VYC9_ARATH Coiled-coil protein OS=Arabidopsis thaliana OX=3702 GN=At1g16210 PE=2	9	SKAEVAKSR	But4C13-SK<But4C13>AEVAK<But4C13>SR-COOH	9	45	44	But4C13			9_SKAEVAKSR	But
Q9SJ44		UEV1C_ARATH Ubiquitin-conjugating enzyme E2 variant 1C OS=Arabidopsis thaliana OX=3702 GN=UEV1C PE=1	2	TLGSGSSVVVPR	But4C13-TLGSGSSVVVPR-COOH	12	71	44	But4C13			2_TLGSGSSVVVPR	But
O49596		HMGB2_ARATH High mobility group B protein 2 OS=Arabidopsis thaliana OX=3702 GN=HMGB2 PE=1	1	MKGAKSKTETR	But4C13-M<Mox*>K<But4C13>GAK<But4C13>SK<But4C13>TETR-COOH	11	61	43	But4C13			1_MKGAKSKTETR	But
O49596		HMGB2_ARATH High mobility group B protein 2 OS=Arabidopsis thaliana OX=3702 GN=HMGB2 PE=1	1	MKGAKSKTETR	But-M<Mox*>K<But>GAK<But>SK<But>TETR-COOH	11	56	45	But			1_MKGAKSKTETR	But
P15456		CRU2_ARATH 12S seed storage protein CRB OS=Arabidopsis thaliana OX=3702 GN=CRB PE=1	422	GYQISPEEAKR	But-GYQISPEEAK<But>R-COOH	11	50	46	But			422_GYQISPEEAKR	But
P25696		ENO2_ARATH Bifunctional enolase 2/transcriptional activator OS=Arabidopsis thaliana OX=3702 GN=ENO2 PE=1	2	ATITVVKAR	Ace-ATITVVK<But4C13>AR-COOH	9	58	41	Ace		Ace	2_ATITVVKAR
F4J573		F4J573_ARATH Late embryogenesis abundant protein (LEA) family protein OS=Arabidopsis thaliana OX=3702 GN=At3g17520 PE=4	251	ADETLESAKDKASQSYDSAAR	NH2-ADETLESAK<But4C13>DK<But4C13>ASQSYDSAAR-COOH	21	106	44	NH2			251_ADETLESAKDKASQSYDSAAR
P49637	Q9LR33 (135-146)	R27A3_ARATH 60S ribosomal protein L27a-3 OS=Arabidopsis thaliana OX=3702 GN=RPL27AC PE=2	135	IKEAGGAVVLTA	NH2-IK<But4C13>EAGGAVVLTA-COOH	12	43	42	NH2			135_IKEAGGAVVLTA
P32962		NRL2_ARATH Nitrilase 2 OS=Arabidopsis thaliana OX=3702 GN=NIT2 PE=1	2	STSENTPFNGVASSTIVR	Ace-STSENTPFNGVASSTIVR-COOH	18	122	45	Ace		Ace	2_STSENTPFNGVASSTIVR
A0A1P8AUM8	Q9SA14 (35-43)	A0A1P8AUM8_ARATH 3-isopropylmalate dehydrogenase OS=Arabidopsis thaliana OX=3702 GN=IMD3 PE=3	50	AAASPVKKR	But-AAASPVK<But>K<But>R-COOH	9	53	41	But			50_AAASPVKKR	But
Q3EDG6		Q3EDG6_ARATH Expressed protein OS=Arabidopsis thaliana OX=3702 GN=At1g07985 PE=2	2	AVVEEPILSR	Ace-AVVEEPILSR-COOH	10	78	44	Ace		Ace	2_AVVEEPILSR
Q9ZSD4		SY121_ARATH Syntaxin-121 OS=Arabidopsis thaliana OX=3702 GN=SYP121 PE=1	1	MNDLFSSSFSR	Ace-M<Mox*>NDLFSSSFSR-COOH	11	46	40	Ace		Ace	1_MNDLFSSSFSR
Q9M8R9		RRAA1_ARATH Putative 4-hydroxy-4-methyl-2-oxoglutarate aldolase 1 OS=Arabidopsis thaliana OX=3702 GN=At3g02770 PE=2	2	AFVTTAEVCDANQEMIR	Ace-AFVTTAEVC<Cmm*>DANQEM<Mox*>IR-COOH	17	81	42	Ace		Ace	2_AFVTTAEVCDANQEMIR
O22969		Y2416_ARATH Uncharacterized protein At2g34160 OS=Arabidopsis thaliana OX=3702 GN=At2g34160 PE=1	1	MEEITDGVNNMNLATDSQKKNR	Ace-M<Mox*>EEITDGVNNM<Mox*>NLATDSQK<But4C13>K<But4C13>NR-COOH	22	90	43	Ace		Ace	1_MEEITDGVNNMNLATDSQKKNR
O22969		Y2416_ARATH Uncharacterized protein At2g34160 OS=Arabidopsis thaliana OX=3702 GN=At2g34160 PE=1	1	MEEITDGVNNMNLATDSQKKNR	Ace-M<Mox*>EEITDGVNNM<Mox*>NLATDSQK<But>K<But>NR-COOH	22	70	43	Ace		Ace	1_MEEITDGVNNMNLATDSQKKNR
O22969		Y2416_ARATH Uncharacterized protein At2g34160 OS=Arabidopsis thaliana OX=3702 GN=At2g34160 PE=1	1	MEEITDGVNNMNLATDSQKKNR	Ace-M<Mox*>EEITDGVNNM<Mox*>NLATDSQK<But>K<But>NR-COOH	22	100	43	Ace		Ace	1_MEEITDGVNNMNLATDSQKKNR
Q9SGW3		PSD8A_ARATH 26S proteasome non-ATPase regulatory subunit 8 homolog A OS=Arabidopsis thaliana OX=3702 GN=RPN12A PE=1	1	MDPQLTEVSQQFER	Ace-M<Mox*>DPQLTEVSQQFER-COOH	14	89	43	Ace		Ace	1_MDPQLTEVSQQFER
F4I9U2	F4I9U3 (162-184)^AQ84WS6 (162-184)	F4I9U2_ARATH Nucleolin OS=Arabidopsis thaliana OX=3702 GN=At1g65090 PE=4	162	TLQDDKKSGNAKSEEVQEQPEKR	NH2-TLQDDK<But4C13>K<But4C13>SGNAK<But4C13>SEEVQEQPEK<But4C13>R-COOH	23	74	45	NH2			162_TLQDDKKSGNAKSEEVQEQPEKR
Q9LF98	A0A1P8BBB5 (38-47)^AB3H6D7 (39-48)^AF4KGQ0 (164-173)^AQ9SJQ9 (130-139)	ALFC8_ARATH Fructose-bisphosphate aldolase 8, cytosolic OS=Arabidopsis thaliana OX=3702 GN=FBA8 PE=1	130	CKKYYEAGAR	NH2-C<Cmm*>K<But4C13>K<But4C13>YYEAGAR-COOH	10	49	46	NH2			130_CKKYYEAGAR
O22969		Y2416_ARATH Uncharacterized protein At2g34160 OS=Arabidopsis thaliana OX=3702 GN=At2g34160 PE=1	1	MEEITDGVNNMNLATDSQKKNR	Ace-M<Mox*>EEITDGVNNM<Mox*>NLATDSQK<But4C13>K<But4C13>NR-COOH	22	84	44	Ace		Ace	1_MEEITDGVNNMNLATDSQKKNR
F4J573		F4J573_ARATH Late embryogenesis abundant protein (LEA) family protein OS=Arabidopsis thaliana OX=3702 GN=At3g17520 PE=4	86	KAEEAVGAAKEKAGS	NH2-K<But4C13>AEEAVGAAK<But4C13>EK<But4C13>AGS-COOH	15	54	44	NH2			86_KAEEAVGAAKEKAGS
P0DKC5	P0DKC6 (334-342)	HSD1A_ARATH 11-beta-hydroxysteroid dehydrogenase 1A OS=Arabidopsis thaliana OX=3702 GN=HSD1 PE=1	334	STLYPESIR	But4C13-STLYPESIR-COOH	9	51	45	But4C13			334_STLYPESIR	But
Q9XFK7		MFT_ARATH Protein MOTHER of FT and TFL1 OS=Arabidopsis thaliana OX=3702 GN=MFT PE=1	2	AASVDPLVVGR	Ace-AASVDPLVVGR-COOH	11	45	44	Ace		Ace	2_AASVDPLVVGR
F4I9U2	F4I9U3 (162-184)^AQ84WS6 (162-184)	F4I9U2_ARATH Nucleolin OS=Arabidopsis thaliana OX=3702 GN=At1g65090 PE=4	162	TLQDDKKSGNAKSEEVQEQPEKR	NH2-TLQDDK<But4C13>K<But4C13>SGNAK<But4C13>SEEVQEQPEK<But4C13>R-COOH	23	77	45	NH2			162_TLQDDKKSGNAKSEEVQEQPEKR
F4J573		F4J573_ARATH Late embryogenesis abundant protein (LEA) family protein OS=Arabidopsis thaliana OX=3702 GN=At3g17520 PE=4	86	KAEEAVGAAKEKAG	NH2-K<But4C13>AEEAVGAAK<But4C13>EK<But4C13>AG-COOH	14	60	44	NH2			86_KAEEAVGAAKEKAG
F4J573		F4J573_ARATH Late embryogenesis abundant protein (LEA) family protein OS=Arabidopsis thaliana OX=3702 GN=At3g17520 PE=4	86	KAEEAVGAAKEKAG	NH2-K<But4C13>AEEAVGAAK<But4C13>EK<But4C13>AG-COOH	14	54	43	NH2			86_KAEEAVGAAKEKAG
Q8VYI4		Q8VYI4_ARATH Aspartate-semialdehyde dehydrogenase, putative OS=Arabidopsis thaliana OX=3702 GN=At1g14810 PE=2	361	KGAALNAVQIA	NH2-K<But4C13>GAALNAVQIA-COOH	11	54	43	NH2			361_KGAALNAVQIA
O22969		Y2416_ARATH Uncharacterized protein At2g34160 OS=Arabidopsis thaliana OX=3702 GN=At2g34160 PE=1	1	MEEITDGVNNMNLATDSQKKNR	Ace-M<Mox*>EEITDGVNNM<Mox*>NLATDSQK<But4C13>K<But4C13>NR-COOH	22	72	44	Ace		Ace	1_MEEITDGVNNMNLATDSQKKNR
Q9FLT0		TSN2_ARATH Ribonuclease TUDOR 2 OS=Arabidopsis thaliana OX=3702 GN=TSN2 PE=1	2	ATGAATENQWLKGR	Ace-ATGAATENQWLK<But4C13>GR-COOH	14	61	46	Ace		Ace	2_ATGAATENQWLKGR
Q9FL69		AGD5_ARATH ADP-ribosylation factor GTPase-activating protein AGD5 OS=Arabidopsis thaliana OX=3702 GN=AGD5 PE=1	1	MNEKANVSKELNAR	Ace-M<Mox*>NEK<But4C13>ANVSK<But4C13>ELNAR-COOH	14	80	45	Ace		Ace	1_MNEKANVSKELNAR
P25696		ENO2_ARATH Bifunctional enolase 2/transcriptional activator OS=Arabidopsis thaliana OX=3702 GN=ENO2 PE=1	2	ATITVVKAR	Ace-ATITVVK<But4C13>AR-COOH	9	50	41	Ace		Ace	2_ATITVVKAR
P93736		SYVM1_ARATH Valine--tRNA ligase, mitochondrial 1 OS=Arabidopsis thaliana OX=3702 GN=TWN2 PE=1	110	DASEENPEDFVDPETPLGER	NH2-DASEENPEDFVDPETPLGER-COOH	20	59	39	NH2			110_DASEENPEDFVDPETPLGER
P15455	F4JLA9 (415-424)^AF4K8S2 (248-257)^AQ96318 (486-495)	CRU1_ARATH 12S seed storage protein CRA1 OS=Arabidopsis thaliana OX=3702 GN=CRA1 PE=1	435	GFQISPEEAR	But-GFQISPEEAR-COOH	10	46	44	But			435_GFQISPEEAR	But
P93736		SYVM1_ARATH Valine--tRNA ligase, mitochondrial 1 OS=Arabidopsis thaliana OX=3702 GN=TWN2 PE=1	110	DASEENPEDFVDPETPLGER	NH2-DASEENPEDFVDPETPLGER-COOH	20	86	39	NH2			110_DASEENPEDFVDPETPLGER
Q9LLC1		BCCP2_ARATH Biotin carboxyl carrier protein of acetyl-CoA carboxylase 2, chloroplastic OS=Arabidopsis thaliana OX=3702 GN=BCCP2 PE=1	121	KKEALQQAVPPA	NH2-K<But4C13>K<But4C13>EALQQAVPPA-COOH	12	50	42	NH2			121_KKEALQQAVPPA
Q39097		ERF1X_ARATH Eukaryotic peptide chain release factor subunit 1-1 OS=Arabidopsis thaliana OX=3702 GN=ERF1-1 PE=1	68	QSVLGAITSAQQR	NH2-Q<Pyr>SVLGAITSAQQR-COOH	13	49	45	NH2	Q<Pyr>		68_QSVLGAITSAQQR
A0A1P8ATG5	P93047 (1-11)	A0A1P8ATG5_ARATH High mobility group B3 OS=Arabidopsis thaliana OX=3702 GN=HMGB3 PE=4	1	MKGAKSKAETR	But-M<Mox*>K<But>GAK<But>SK<But>AETR-COOH	11	82	45	But			1_MKGAKSKAETR	But
A0A1P8ATG5	P93047 (1-11)	A0A1P8ATG5_ARATH High mobility group B3 OS=Arabidopsis thaliana OX=3702 GN=HMGB3 PE=4	1	MKGAKSKAETR	But4C13-M<Mox*>K<But4C13>GAK<But4C13>SK<But4C13>AETR-COOH	11	75	43	But4C13			1_MKGAKSKAETR	But
F4J573		F4J573_ARATH Late embryogenesis abundant protein (LEA) family protein OS=Arabidopsis thaliana OX=3702 GN=At3g17520 PE=4	86	KAEEAVGAAKEKA	NH2-K<But>AEEAVGAAK<But>EK<But>A-COOH	13	51	45	NH2			86_KAEEAVGAAKEKA
Q9SXC8		UFC1_ARATH Ubiquitin-fold modifier-conjugating enzyme 1 OS=Arabidopsis thaliana OX=3702 GN=At1g27530 PE=2	1	MEGWDPNTKSTLTR	Ace-M<Mox*>EGWDPNTK<But4C13>STLTR-COOH	14	87	44	Ace		Ace	1_MEGWDPNTKSTLTR
F4J573		F4J573_ARATH Late embryogenesis abundant protein (LEA) family protein OS=Arabidopsis thaliana OX=3702 GN=At3g17520 PE=4	86	KAEEAVGAAKEKA	NH2-K<But4C13>AEEAVGAAK<But4C13>EK<But4C13>A-COOH	13	45	43	NH2			86_KAEEAVGAAKEKA
Q3E902		RS212_ARATH 40S ribosomal protein S21-2 OS=Arabidopsis thaliana OX=3702 GN=RPS21C PE=1	1	MQNEEGQVTELYIPR	Ace-M<Mox*>QNEEGQVTELYIPR-COOH	15	137	44	Ace		Ace	1_MQNEEGQVTELYIPR
Q3E902		RS212_ARATH 40S ribosomal protein S21-2 OS=Arabidopsis thaliana OX=3702 GN=RPS21C PE=1	1	MQNEEGQVTELYIPR	Ace-M<Mox*>QNEEGQVTELYIPR-COOH	15	80	44	Ace		Ace	1_MQNEEGQVTELYIPR
Q9SIN3		Q9SIN3_ARATH Late embryogenesis abundant domain-containing protein / LEA domain-containing protein OS=Arabidopsis thaliana OX=3702 GN=At2g42560 PE=4	122	AQQKSMDSIKAAEER	But4C13-AQQK<But4C13>SM<Mox*>DSIK<But4C13>AAEER-COOH	15	57	45	But4C13			122_AQQKSMDSIKAAEER	But
Q9SIN3		Q9SIN3_ARATH Late embryogenesis abundant domain-containing protein / LEA domain-containing protein OS=Arabidopsis thaliana OX=3702 GN=At2g42560 PE=4	122	AQQKSMDSIKAAEER	But4C13-AQQK<But4C13>SM<Mox*>DSIK<But4C13>AAEER-COOH	15	91	45	But4C13			122_AQQKSMDSIKAAEER	But
F4J573		F4J573_ARATH Late embryogenesis abundant protein (LEA) family protein OS=Arabidopsis thaliana OX=3702 GN=At3g17520 PE=4	76	AEDAKEAAKR	But4C13-AEDAK<But4C13>EAAK<But4C13>R-COOH	10	57	44	But4C13			76_AEDAKEAAKR	But
Q9LF88		Y3304_ARATH Late embryogenesis abundant protein At3g53040 OS=Arabidopsis thaliana OX=3702 GN=At3g53040 PE=2	103	DSTAQKTKETADYTADKAR	NH2-DSTAQK<But4C13>TK<But4C13>ETADYTADK<But4C13>AR-COOH	19	60	45	NH2			103_DSTAQKTKETADYTADKAR
Q9LF88		Y3304_ARATH Late embryogenesis abundant protein At3g53040 OS=Arabidopsis thaliana OX=3702 GN=At3g53040 PE=2	103	DSTAQKTKETADYTADKAR	NH2-DSTAQK<But4C13>TK<But4C13>ETADYTADK<But4C13>AR-COOH	19	125	46	NH2			103_DSTAQKTKETADYTADKAR
Q9SIN3		Q9SIN3_ARATH Late embryogenesis abundant domain-containing protein / LEA domain-containing protein OS=Arabidopsis thaliana OX=3702 GN=At2g42560 PE=4	122	AQQKSMDSIKAAEER	But4C13-AQQK<But4C13>SM<Mox*>DSIK<But4C13>AAEER-COOH	15	50	45	But4C13			122_AQQKSMDSIKAAEER	But
Q9M8R9		RRAA1_ARATH Putative 4-hydroxy-4-methyl-2-oxoglutarate aldolase 1 OS=Arabidopsis thaliana OX=3702 GN=At3g02770 PE=2	2	AFVTTAEVCDANQEMIR	Ace-AFVTTAEVC<Cmm*>DANQEM<Mox*>IR-COOH	17	83	41	Ace		Ace	2_AFVTTAEVCDANQEMIR
Q9LF88		Y3304_ARATH Late embryogenesis abundant protein At3g53040 OS=Arabidopsis thaliana OX=3702 GN=At3g53040 PE=2	103	DSTAQKTKETADYTADKAR	NH2-DSTAQK<But>TK<But>ETADYTADK<But>AR-COOH	19	74	45	NH2			103_DSTAQKTKETADYTADKAR
Q9LF88		Y3304_ARATH Late embryogenesis abundant protein At3g53040 OS=Arabidopsis thaliana OX=3702 GN=At3g53040 PE=2	103	DSTAQKTKETADYTADKAR	NH2-DSTAQK<But>TK<But>ETADYTADK<But>AR-COOH	19	99	45	NH2			103_DSTAQKTKETADYTADKAR
Q9M8R9		RRAA1_ARATH Putative 4-hydroxy-4-methyl-2-oxoglutarate aldolase 1 OS=Arabidopsis thaliana OX=3702 GN=At3g02770 PE=2	2	AFVTTAEVCDANQEMIR	Ace-AFVTTAEVC<Cmm*>DANQEM<Mox*>IR-COOH	17	65	42	Ace		Ace	2_AFVTTAEVCDANQEMIR
Q9FJW4		NDUS4_ARATH NADH dehydrogenase [ubiquinone] iron-sulfur protein 4, mitochondrial OS=Arabidopsis thaliana OX=3702 GN=FRO1 PE=1	25	ATDAVVESDYKR	But4C13-ATDAVVESDYK<But4C13>R-COOH	12	75	45	But4C13			25_ATDAVVESDYKR	But
Q9FJW4		NDUS4_ARATH NADH dehydrogenase [ubiquinone] iron-sulfur protein 4, mitochondrial OS=Arabidopsis thaliana OX=3702 GN=FRO1 PE=1	25	ATDAVVESDYKR	But-ATDAVVESDYK<But>R-COOH	12	78	45	But			25_ATDAVVESDYKR	But
Q8VZG7		TSN1_ARATH Ribonuclease TUDOR 1 OS=Arabidopsis thaliana OX=3702 GN=TSN1 PE=1	2	ATGAENQWLKGR	Ace-ATGAENQWLK<But4C13>GR-COOH	12	102	46	Ace		Ace	2_ATGAENQWLKGR
Q9LIF9		BGL19_ARATH Beta-glucosidase 19 OS=Arabidopsis thaliana OX=3702 GN=BGLU19 PE=2	22	EEGPVCPKTETLSR	But-EEGPVC<Cmm*>PK<But>TETLSR-COOH	14	93	44	But			22_EEGPVCPKTETLSR	But
Q9LIF9		BGL19_ARATH Beta-glucosidase 19 OS=Arabidopsis thaliana OX=3702 GN=BGLU19 PE=2	22	EEGPVCPKTETLSR	But4C13-EEGPVC<Cmm*>PK<But4C13>TETLSR-COOH	14	54	45	But4C13			22_EEGPVCPKTETLSR	But
Q39132		Q39132_ARATH At1g14950/F10B6_18 OS=Arabidopsis thaliana OX=3702 GN=MLP1 PE=2	64	GKQEVFKEKR	NH2-GK<But4C13>QEVFK<But4C13>EK<But4C13>R-COOH	10	48	42	NH2			64_GKQEVFKEKR
Q3E902		RS212_ARATH 40S ribosomal protein S21-2 OS=Arabidopsis thaliana OX=3702 GN=RPS21C PE=1	1	MQNEEGQVTELYIPR	Ace-M<Mox*>QNEEGQVTELYIPR-COOH	15	146	44	Ace		Ace	1_MQNEEGQVTELYIPR
Q3E902		RS212_ARATH 40S ribosomal protein S21-2 OS=Arabidopsis thaliana OX=3702 GN=RPS21C PE=1	1	MQNEEGQVTELYIPR	Ace-M<Mox*>QNEEGQVTELYIPR-COOH	15	67	44	Ace		Ace	1_MQNEEGQVTELYIPR
Q3E902		RS212_ARATH 40S ribosomal protein S21-2 OS=Arabidopsis thaliana OX=3702 GN=RPS21C PE=1	1	MQNEEGQVTELYIPR	Ace-M<Mox*>QNEEGQVTELYIPR-COOH	15	150	44	Ace		Ace	1_MQNEEGQVTELYIPR
Q9M8R9		RRAA1_ARATH Putative 4-hydroxy-4-methyl-2-oxoglutarate aldolase 1 OS=Arabidopsis thaliana OX=3702 GN=At3g02770 PE=2	2	AFVTTAEVCDANQEMIR	Ace-AFVTTAEVC<Cmm*>DANQEM<Mox*>IR-COOH	17	93	42	Ace		Ace	2_AFVTTAEVCDANQEMIR
F4J8V9	P0CJ46 (15-30)^AP0CJ47 (15-30)^AP53492 (15-30)^AP53494 (15-30)^AP53496 (15-30)^AP53497 (15-30)^AQ8RYC2 (16-31)^AQ96292 (15-30)^AQ96293 (15-30)	F4J8V9_ARATH Actin 2 OS=Arabidopsis thaliana OX=3702 GN=ACT2 PE=1	15	GTGMVKAGFAGDDAPR	But4C13-GTGM<Mox*>VK<But4C13>AGFAGDDAPR-COOH	16	50	45	But4C13			15_GTGMVKAGFAGDDAPR	But
Q9M8R9		RRAA1_ARATH Putative 4-hydroxy-4-methyl-2-oxoglutarate aldolase 1 OS=Arabidopsis thaliana OX=3702 GN=At3g02770 PE=2	2	AFVTTAEVCDANQEMIR	Ace-AFVTTAEVC<Cmm*>DANQEM<Mox*>IR-COOH	17	68	42	Ace		Ace	2_AFVTTAEVCDANQEMIR
Q9FLT0		TSN2_ARATH Ribonuclease TUDOR 2 OS=Arabidopsis thaliana OX=3702 GN=TSN2 PE=1	2	ATGAATENQWLKGR	Ace-ATGAATENQWLK<But4C13>GR-COOH	14	115	46	Ace		Ace	2_ATGAATENQWLKGR
Q3E902		RS212_ARATH 40S ribosomal protein S21-2 OS=Arabidopsis thaliana OX=3702 GN=RPS21C PE=1	1	MQNEEGQVTELYIPR	Ace-M<Mox*>QNEEGQVTELYIPR-COOH	15	103	43	Ace		Ace	1_MQNEEGQVTELYIPR
F4J8V9	P0CJ46 (15-30)^AP0CJ47 (15-30)^AP53492 (15-30)^AP53494 (15-30)^AP53496 (15-30)^AP53497 (15-30)^AQ8RYC2 (16-31)^AQ96292 (15-30)^AQ96293 (15-30)	F4J8V9_ARATH Actin 2 OS=Arabidopsis thaliana OX=3702 GN=ACT2 PE=1	15	GTGMVKAGFAGDDAPR	But-GTGM<Mox*>VK<But>AGFAGDDAPR-COOH	16	72	44	But			15_GTGMVKAGFAGDDAPR	But
Q3E902		RS212_ARATH 40S ribosomal protein S21-2 OS=Arabidopsis thaliana OX=3702 GN=RPS21C PE=1	1	MQNEEGQVTELYIPR	Ace-M<Mox*>QNEEGQVTELYIPR-COOH	15	81	43	Ace		Ace	1_MQNEEGQVTELYIPR
Q9SIN3		Q9SIN3_ARATH Late embryogenesis abundant domain-containing protein / LEA domain-containing protein OS=Arabidopsis thaliana OX=3702 GN=At2g42560 PE=4	516	GSEKDVYGYGAKGIPGEGR	NH2-GSEK<But4C13>DVYGYGAK<But4C13>GIPGEGR-COOH	19	90	46	NH2			516_GSEKDVYGYGAKGIPGEGR
Q9SIN3		Q9SIN3_ARATH Late embryogenesis abundant domain-containing protein / LEA domain-containing protein OS=Arabidopsis thaliana OX=3702 GN=At2g42560 PE=4	516	GSEKDVYGYGAKGIPGEGR	NH2-GSEK<But>DVYGYGAK<But>GIPGEGR-COOH	19	84	45	NH2			516_GSEKDVYGYGAKGIPGEGR
Q9SIN3		Q9SIN3_ARATH Late embryogenesis abundant domain-containing protein / LEA domain-containing protein OS=Arabidopsis thaliana OX=3702 GN=At2g42560 PE=4	516	GSEKDVYGYGAKGIPGEGR	NH2-GSEK<But4C13>DVYGYGAK<But4C13>GIPGEGR-COOH	19	61	45	NH2			516_GSEKDVYGYGAKGIPGEGR
P15456		CRU2_ARATH 12S seed storage protein CRB OS=Arabidopsis thaliana OX=3702 GN=CRB PE=1	191	PQGQEWLQGR	But-PQGQEWLQGR-COOH	10	49	45	But			191_PQGQEWLQGR	But
Q9M8R9		RRAA1_ARATH Putative 4-hydroxy-4-methyl-2-oxoglutarate aldolase 1 OS=Arabidopsis thaliana OX=3702 GN=At3g02770 PE=2	2	AFVTTAEVCDANQEMIR	Ace-AFVTTAEVC<Cmm*>DANQEM<Mox*>IR-COOH	17	87	42	Ace		Ace	2_AFVTTAEVCDANQEMIR
A0A1P8AV08	O65390 (465-475)	A0A1P8AV08_ARATH Aspartic proteinase A1 OS=Arabidopsis thaliana OX=3702 GN=APA1 PE=3	476	GFIALDVAPPR	NH2-GFIALDVAPPR-COOH	11	45	44	NH2			476_GFIALDVAPPR
Q8VXX3		Q8VXX3_ARATH HSP20-like chaperones superfamily protein OS=Arabidopsis thaliana OX=3702 GN=MZN1.18 PE=2	2	AEKLAPEKR	Ace-AEK<But4C13>LAPEK<But4C13>R-COOH	9	48	44	Ace		Ace	2_AEKLAPEKR
Q9M8R9		RRAA1_ARATH Putative 4-hydroxy-4-methyl-2-oxoglutarate aldolase 1 OS=Arabidopsis thaliana OX=3702 GN=At3g02770 PE=2	2	AFVTTAEVCDANQEMIR	Ace-AFVTTAEVC<Cmm*>DANQEM<Mox*>IR-COOH	17	44	41	Ace		Ace	2_AFVTTAEVCDANQEMIR
Q9SKP0	A0A1P8B189 (343-357)	ECP63_ARATH Late embryogenesis abundant protein ECP63 OS=Arabidopsis thaliana OX=3702 GN=ECP63 PE=2	343	GAQKAEETKDSAAVR	But4C13-GAQK<But4C13>AEETK<But4C13>DSAAVR-COOH	15	67	45	But4C13			343_GAQKAEETKDSAAVR	But
Q9M337		RS211_ARATH 40S ribosomal protein S21-1 OS=Arabidopsis thaliana OX=3702 GN=RPS21B PE=1	1	MENDAGQVTELYIPR	Ace-M<Mox*>ENDAGQVTELYIPR-COOH	15	141	44	Ace		Ace	1_MENDAGQVTELYIPR
P15456		CRU2_ARATH 12S seed storage protein CRB OS=Arabidopsis thaliana OX=3702 GN=CRB PE=1	191	PQGQEWLQGR	But4C13-PQGQEWLQGR-COOH	10	74	46	But4C13			191_PQGQEWLQGR	But
Q9LXQ2		Q9LXQ2_ARATH At3g44100 OS=Arabidopsis thaliana OX=3702 GN=F26G5_50 PE=2	25	TSFTYCDKR	But4C13-TSFTYC<Cmm*>DK<But4C13>R-COOH	9	53	44	But4C13			25_TSFTYCDKR	But
O49595	F4J5M5 (111-136)	HMGB1_ARATH High mobility group B protein 1 OS=Arabidopsis thaliana OX=3702 GN=HMGB1 PE=1	111	KAEYEKQMDAYNKNLEEGSDESEKSR	NH2-K<But>AEYEK<But>QM<Mox*>DAYNK<But>NLEEGSDESEK<But>SR-COOH	26	86	42	NH2			111_KAEYEKQMDAYNKNLEEGSDESEKSR
Q9SKP0	A0A1P8B189 (343-357)	ECP63_ARATH Late embryogenesis abundant protein ECP63 OS=Arabidopsis thaliana OX=3702 GN=ECP63 PE=2	343	GAQKAEETKDSAAVR	But4C13-GAQK<But4C13>AEETK<But4C13>DSAAVR-COOH	15	63	45	But4C13			343_GAQKAEETKDSAAVR	But
Q9M337		RS211_ARATH 40S ribosomal protein S21-1 OS=Arabidopsis thaliana OX=3702 GN=RPS21B PE=1	1	MENDAGQVTELYIPR	Ace-M<Mox*>ENDAGQVTELYIPR-COOH	15	93	44	Ace		Ace	1_MENDAGQVTELYIPR
A0A1P8AVA7	A0A1P8AVE7 (137-146)^AA0A1P8AVH3 (137-146)^AQ8VYL3 (137-146)	A0A1P8AVA7_ARATH Saposin-like aspartyl protease family protein OS=Arabidopsis thaliana OX=3702 GN=At1g62290 PE=3	137	SSTYKKSGKR	But4C13-SSTYK<But4C13>K<But4C13>SGK<But4C13>R-COOH	10	54	43	But4C13			137_SSTYKKSGKR	But
P15456		CRU2_ARATH 12S seed storage protein CRB OS=Arabidopsis thaliana OX=3702 GN=CRB PE=1	191	PQGQEWLQGR	But-PQGQEWLQGR-COOH	10	85	45	But			191_PQGQEWLQGR	But
P15456		CRU2_ARATH 12S seed storage protein CRB OS=Arabidopsis thaliana OX=3702 GN=CRB PE=1	102	VIPGCAETFMESPVFGEGQGQGQSQGFR	NH2-VIPGC<Cmm*>AETFM<Mox*>ESPVFGEGQGQGQSQGFR-COOH	28	70	40	NH2			102_VIPGCAETFMESPVFGEGQGQGQSQGFR
A0A1P8AVA7	A0A1P8AVE7 (137-146)^AA0A1P8AVH3 (137-146)^AQ8VYL3 (137-146)	A0A1P8AVA7_ARATH Saposin-like aspartyl protease family protein OS=Arabidopsis thaliana OX=3702 GN=At1g62290 PE=3	137	SSTYKKSGKR	But-SSTYK<But>K<But>SGK<But>R-COOH	10	48	44	But			137_SSTYKKSGKR	But
B3H7G1	Q9SR67 (1-16)	B3H7G1_ARATH Plant/protein OS=Arabidopsis thaliana OX=3702 GN=At3g10020 PE=1	1	MQAVSVDETKNTVVLR	Ace-M<Mox*>QAVSVDETK<But4C13>NTVVLR-COOH	16	100	46	Ace		Ace	1_MQAVSVDETKNTVVLR
P38420		NRPB2_ARATH DNA-directed RNA polymerase II subunit 2 OS=Arabidopsis thaliana OX=3702 GN=NRPB2 PE=1	218	QPNKYAYVGEVR	NH2-Q<Pyr>PNK<But4C13>YAYVGEVR-COOH	12	65	45	NH2	Q<Pyr>		218_QPNKYAYVGEVR
A0A2H1ZE15	O82197 (191-208)	A0A2H1ZE15_ARATH SNF7 family protein OS=Arabidopsis thaliana OX=3702 GN=SNF7.2 PE=4	172	APAQKQPTAEEDELAALQ	NH2-APAQK<But4C13>QPTAEEDELAALQ-COOH	18	49	46	NH2			172_APAQKQPTAEEDELAALQ
P15456		CRU2_ARATH 12S seed storage protein CRB OS=Arabidopsis thaliana OX=3702 GN=CRB PE=1	102	VIPGCAETFMESPVFGEGQGQGQSQGFR	NH2-VIPGC<Cmm*>AETFM<Mox*>ESPVFGEGQGQGQSQGFR-COOH	28	47	40	NH2			102_VIPGCAETFMESPVFGEGQGQGQSQGFR
P15456		CRU2_ARATH 12S seed storage protein CRB OS=Arabidopsis thaliana OX=3702 GN=CRB PE=1	191	PQGQEWLQGR	But4C13-PQGQEWLQGR-COOH	10	49	45	But4C13			191_PQGQEWLQGR	But
Q9M337		RS211_ARATH 40S ribosomal protein S21-1 OS=Arabidopsis thaliana OX=3702 GN=RPS21B PE=1	1	MENDAGQVTELYIPR	Ace-M<Mox*>ENDAGQVTELYIPR-COOH	15	150	44	Ace		Ace	1_MENDAGQVTELYIPR
Q93YR3		F10AL_ARATH FAM10 family protein At4g22670 OS=Arabidopsis thaliana OX=3702 GN=At4g22670 PE=1	188	PDSAKGYKSR	But-PDSAK<But>GYK<But>SR-COOH	10	54	46	But			188_PDSAKGYKSR	But
Q9LIF9		BGL19_ARATH Beta-glucosidase 19 OS=Arabidopsis thaliana OX=3702 GN=BGLU19 PE=2	208	SGYDVGKKAPGR	But-SGYDVGK<But>K<But>APGR-COOH	12	60	46	But			208_SGYDVGKKAPGR	But
A8MS03	F4KGU2 (177-184)^AO48549 (229-236)^AP51430 (229-236)	A8MS03_ARATH Ribosomal protein S6 OS=Arabidopsis thaliana OX=3702 GN=RPS6 PE=1	167	SESLAKKR	But-SESLAK<But>K<But>R-COOH	8	50	43	But			167_SESLAKKR	But
Q9LIF9		BGL19_ARATH Beta-glucosidase 19 OS=Arabidopsis thaliana OX=3702 GN=BGLU19 PE=2	208	SGYDVGKKAPGR	But-SGYDVGK<But>K<But>APGR-COOH	12	73	46	But			208_SGYDVGKKAPGR	But
P0DKC5	P0DKC6 (253-267)	HSD1A_ARATH 11-beta-hydroxysteroid dehydrogenase 1A OS=Arabidopsis thaliana OX=3702 GN=HSD1 PE=1	253	DVQVGPFPVASASGC	NH2-DVQVGPFPVASASGC<Cmm*>-COOH	15	56	44	NH2			253_DVQVGPFPVASASGC
B3H7G1	Q9SR67 (1-16)	B3H7G1_ARATH Plant/protein OS=Arabidopsis thaliana OX=3702 GN=At3g10020 PE=1	1	MQAVSVDETKNTVVLR	Ace-M<Mox*>QAVSVDETK<But4C13>NTVVLR-COOH	16	105	45	Ace		Ace	1_MQAVSVDETKNTVVLR
F4JLA9	Q96318 (401-413)	F4JLA9_ARATH Cruciferin 3 OS=Arabidopsis thaliana OX=3702 GN=CRU3 PE=1	330	ANEILYCTGGQGR	But4C13-ANEILYC<Cmm*>TGGQGR-COOH	13	57	44	But4C13			330_ANEILYCTGGQGR	But
Q9SAZ5		AHP3_ARATH Histidine-containing phosphotransfer protein 3 OS=Arabidopsis thaliana OX=3702 GN=AHP3 PE=1	1	MDTLIAQLQR	Ace-M<Mox*>DTLIAQLQR-COOH	10	65	46	Ace		Ace	1_MDTLIAQLQR
Q9LIF9		BGL19_ARATH Beta-glucosidase 19 OS=Arabidopsis thaliana OX=3702 GN=BGLU19 PE=2	208	SGYDVGKKAPGR	But4C13-SGYDVGK<But4C13>K<But4C13>APGR-COOH	12	68	45	But4C13			208_SGYDVGKKAPGR	But
Q9M337		RS211_ARATH 40S ribosomal protein S21-1 OS=Arabidopsis thaliana OX=3702 GN=RPS21B PE=1	1	MENDAGQVTELYIPR	Ace-M<Mox*>ENDAGQVTELYIPR-COOH	15	67	44	Ace		Ace	1_MENDAGQVTELYIPR
F4JLA9	Q96318 (401-413)	F4JLA9_ARATH Cruciferin 3 OS=Arabidopsis thaliana OX=3702 GN=CRU3 PE=1	330	ANEILYCTGGQGR	But-ANEILYC<Cmm*>TGGQGR-COOH	13	65	44	But			330_ANEILYCTGGQGR	But
P15456		CRU2_ARATH 12S seed storage protein CRB OS=Arabidopsis thaliana OX=3702 GN=CRB PE=1	110	FMESPVFGEGQGQGQSQGFR	NH2-FM<Mox*>ESPVFGEGQGQGQSQGFR-COOH	20	74	39	NH2			110_FMESPVFGEGQGQGQSQGFR
B3H7G1	Q9SR67 (1-16)	B3H7G1_ARATH Plant/protein OS=Arabidopsis thaliana OX=3702 GN=At3g10020 PE=1	1	MQAVSVDETKNTVVLR	Ace-M<Mox*>QAVSVDETK<But4C13>NTVVLR-COOH	16	137	46	Ace		Ace	1_MQAVSVDETKNTVVLR
Q3E902		RS212_ARATH 40S ribosomal protein S21-2 OS=Arabidopsis thaliana OX=3702 GN=RPS21C PE=1	1	MQNEEGQVTELYIPR	Ace-M<Mox*>QNEEGQVTELYIPR-COOH	15	51	43	Ace		Ace	1_MQNEEGQVTELYIPR
Q9LIF9		BGL19_ARATH Beta-glucosidase 19 OS=Arabidopsis thaliana OX=3702 GN=BGLU19 PE=2	208	SGYDVGKKAPGR	But4C13-SGYDVGK<But4C13>K<But4C13>APGR-COOH	12	60	45	But4C13			208_SGYDVGKKAPGR	But
P50883		RL121_ARATH 60S ribosomal protein L12-1 OS=Arabidopsis thaliana OX=3702 GN=RPL12A PE=2	151	DIQQEIQDGEVEIPEN	NH2-DIQQEIQDGEVEIPEN-COOH	16	56	43	NH2			151_DIQQEIQDGEVEIPEN
Q93YR3		F10AL_ARATH FAM10 family protein At4g22670 OS=Arabidopsis thaliana OX=3702 GN=At4g22670 PE=1	188	PDSAKGYKSR	But-PDSAK<But>GYK<But>SR-COOH	10	72	46	But			188_PDSAKGYKSR	But
Q93YR3		F10AL_ARATH FAM10 family protein At4g22670 OS=Arabidopsis thaliana OX=3702 GN=At4g22670 PE=1	188	PDSAKGYKSR	But4C13-PDSAK<But4C13>GYK<But4C13>SR-COOH	10	58	45	But4C13			188_PDSAKGYKSR	But
P15456		CRU2_ARATH 12S seed storage protein CRB OS=Arabidopsis thaliana OX=3702 GN=CRB PE=1	191	PQGQEWLQGR	But-PQGQEWLQGR-COOH	10	58	45	But			191_PQGQEWLQGR	But
A0A2H1ZEH9		A0A2H1ZEH9_ARATH Cysteine proteinase inhibitor OS=Arabidopsis thaliana OX=3702 GN=CYSB PE=1	2	ALVGGVGDVPANQNSGEVESLAR	Ace-ALVGGVGDVPANQNSGEVESLAR-COOH	23	63	45	Ace		Ace	2_ALVGGVGDVPANQNSGEVESLAR
A0A2H1ZEH9		A0A2H1ZEH9_ARATH Cysteine proteinase inhibitor OS=Arabidopsis thaliana OX=3702 GN=CYSB PE=1	2	ALVGGVGDVPANQNSGEVESLAR	Ace-ALVGGVGDVPANQNSGEVESLAR-COOH	23	127	46	Ace		Ace	2_ALVGGVGDVPANQNSGEVESLAR
P15456		CRU2_ARATH 12S seed storage protein CRB OS=Arabidopsis thaliana OX=3702 GN=CRB PE=1	102	VIPGCAETFMESPVFGEGQGQGQSQGFR	NH2-VIPGC<Cmm*>AETFM<Mox*>ESPVFGEGQGQGQSQGFR-COOH	28	60	40	NH2			102_VIPGCAETFMESPVFGEGQGQGQSQGFR
A0A2H1ZEH9		A0A2H1ZEH9_ARATH Cysteine proteinase inhibitor OS=Arabidopsis thaliana OX=3702 GN=CYSB PE=1	2	ALVGGVGDVPANQNSGEVESLAR	Ace-ALVGGVGDVPANQNSGEVESLAR-COOH	23	101	45	Ace		Ace	2_ALVGGVGDVPANQNSGEVESLAR
P15456		CRU2_ARATH 12S seed storage protein CRB OS=Arabidopsis thaliana OX=3702 GN=CRB PE=1	110	FMESPVFGEGQGQGQSQGFR	But4C13-FM<Mox*>ESPVFGEGQGQGQSQGFR-COOH	20	71	40	But4C13			110_FMESPVFGEGQGQGQSQGFR	But
Q9ZNV8		AHP2_ARATH Histidine-containing phosphotransfer protein 2 OS=Arabidopsis thaliana OX=3702 GN=AHP2 PE=1	1	MDALIAQLQR	Ace-M<Mox*>DALIAQLQR-COOH	10	56	46	Ace		Ace	1_MDALIAQLQR
Q9SY73		PTALR_ARATH NADPH-dependent pterin aldehyde reductase OS=Arabidopsis thaliana OX=3702 GN=At1g10310 PE=1	2	TMATPFSGAANSIVAAR	Ace-TM<Mox*>ATPFSGAANSIVAAR-COOH	17	145	45	Ace		Ace	2_TMATPFSGAANSIVAAR
O49595	F4J5M5 (111-128)	HMGB1_ARATH High mobility group B protein 1 OS=Arabidopsis thaliana OX=3702 GN=HMGB1 PE=1	111	KAEYEKQMDAYNKNLEEG	NH2-K<But4C13>AEYEK<But4C13>QM<Mox*>DAYNK<But4C13>NLEEG-COOH	18	55	45	NH2			111_KAEYEKQMDAYNKNLEEG
Q9LF88		Y3304_ARATH Late embryogenesis abundant protein At3g53040 OS=Arabidopsis thaliana OX=3702 GN=At3g53040 PE=2	103	DSTAQKTKETADYTADKAR	NH2-DSTAQK<But4C13>TK<But4C13>ETADYTADK<But4C13>AR-COOH	19	100	45	NH2			103_DSTAQKTKETADYTADKAR
Q9LF88		Y3304_ARATH Late embryogenesis abundant protein At3g53040 OS=Arabidopsis thaliana OX=3702 GN=At3g53040 PE=2	103	DSTAQKTKETADYTADKAR	NH2-DSTAQK<But4C13>TK<But4C13>ETADYTADK<But4C13>AR-COOH	19	121	45	NH2			103_DSTAQKTKETADYTADKAR
Q9LF88		Y3304_ARATH Late embryogenesis abundant protein At3g53040 OS=Arabidopsis thaliana OX=3702 GN=At3g53040 PE=2	103	DSTAQKTKETADYTADKAR	NH2-DSTAQK<But4C13>TK<But4C13>ETADYTADK<But4C13>AR-COOH	19	105	45	NH2			103_DSTAQKTKETADYTADKAR
F4KG52	Q04980 (580-619)	F4KG52_ARATH CAP160 protein OS=Arabidopsis thaliana OX=3702 GN=LTI65 PE=4	579	SVEESPQSLGTTVGTMGFSDSGGSELGGSGGGKGVQDSGN	NH2-SVEESPQSLGTTVGTM<Mox*>GFSDSGGSELGGSGGGK<But4C13>GVQDSGN-COOH	40	50	40	NH2			579_SVEESPQSLGTTVGTMGFSDSGGSELGGSGGGKGVQDSGN
F4KG52	Q04980 (580-619)	F4KG52_ARATH CAP160 protein OS=Arabidopsis thaliana OX=3702 GN=LTI65 PE=4	579	SVEESPQSLGTTVGTMGFSDSGGSELGGSGGGKGVQDSGN	NH2-SVEESPQSLGTTVGTM<Mox*>GFSDSGGSELGGSGGGK<But4C13>GVQDSGN-COOH	40	58	38	NH2			579_SVEESPQSLGTTVGTMGFSDSGGSELGGSGGGKGVQDSGN
Q9LIF9		BGL19_ARATH Beta-glucosidase 19 OS=Arabidopsis thaliana OX=3702 GN=BGLU19 PE=2	24	GPVCPKTETLSR	But-GPVC<Cmm*>PK<But>TETLSR-COOH	12	48	45	But			24_GPVCPKTETLSR	But
Q8L428	Q9T0I9 (271-280)	Q8L428_ARATH Calcium-binding EF-hand family protein OS=Arabidopsis thaliana OX=3702 GN=At4g38810 PE=2	161	QGKVSKGYLR	NH2-Q<Pyr>GK<But4C13>VSK<But4C13>GYLR-COOH	10	50	42	NH2	Q<Pyr>		161_QGKVSKGYLR
P35614	Q9LPV8 (66-78)	ERF1Z_ARATH Eukaryotic peptide chain release factor subunit 1-3 OS=Arabidopsis thaliana OX=3702 GN=ERF1-3 PE=1	67	QSVLSAITSAQQR	NH2-Q<Pyr>SVLSAITSAQQR-COOH	13	58	46	NH2	Q<Pyr>		67_QSVLSAITSAQQR
Q9LIF9		BGL19_ARATH Beta-glucosidase 19 OS=Arabidopsis thaliana OX=3702 GN=BGLU19 PE=2	24	GPVCPKTETLSR	But-GPVC<Cmm*>PK<But>TETLSR-COOH	12	49	45	But			24_GPVCPKTETLSR	But
P15456		CRU2_ARATH 12S seed storage protein CRB OS=Arabidopsis thaliana OX=3702 GN=CRB PE=1	102	VIPGCAETFMESPVFGEGQGQGQSQGFR	NH2-VIPGC<Cmm*>AETFM<Mox*>ESPVFGEGQGQGQSQGFR-COOH	28	67	40	NH2			102_VIPGCAETFMESPVFGEGQGQGQSQGFR
A0A2H1ZEH9		A0A2H1ZEH9_ARATH Cysteine proteinase inhibitor OS=Arabidopsis thaliana OX=3702 GN=CYSB PE=1	2	ALVGGVGDVPANQNSGEVESLAR	Ace-ALVGGVGDVPANQNSGEVESLAR-COOH	23	130	45	Ace		Ace	2_ALVGGVGDVPANQNSGEVESLAR
A0A2H1ZEH9		A0A2H1ZEH9_ARATH Cysteine proteinase inhibitor OS=Arabidopsis thaliana OX=3702 GN=CYSB PE=1	2	ALVGGVGDVPANQNSGEVESLAR	Ace-ALVGGVGDVPANQNSGEVESLAR-COOH	23	108	45	Ace		Ace	2_ALVGGVGDVPANQNSGEVESLAR
Q43292		RL372_ARATH 60S ribosomal protein L37-2 OS=Arabidopsis thaliana OX=3702 GN=RPL37B PE=3	2	TKGTGSFGKR	But4C13-TK<But4C13>GTGSFGK<But4C13>R-COOH	10	63	44	But4C13			2_TKGTGSFGKR	But
Q43292		RL372_ARATH 60S ribosomal protein L37-2 OS=Arabidopsis thaliana OX=3702 GN=RPL37B PE=3	2	TKGTGSFGKR	But-TK<But>GTGSFGK<But>R-COOH	10	69	45	But			2_TKGTGSFGKR	But
Q9SKP0	A0A1P8B189 (30-41)	ECP63_ARATH Late embryogenesis abundant protein ECP63 OS=Arabidopsis thaliana OX=3702 GN=ECP63 PE=2	30	GADVTMYKVTER	But-GADVTM<Mox*>YK<But>VTER-COOH	12	55	45	But			30_GADVTMYKVTER	But
O48782		HMOX1_ARATH Heme oxygenase 1, chloroplastic OS=Arabidopsis thaliana OX=3702 GN=HO1 PE=1	56	ATTAAEKQKKR	But4C13-ATTAAEK<But4C13>QK<But4C13>K<But4C13>R-COOH	11	63	40	But4C13			56_ATTAAEKQKKR	But
O48782		HMOX1_ARATH Heme oxygenase 1, chloroplastic OS=Arabidopsis thaliana OX=3702 GN=HO1 PE=1	56	ATTAAEKQKKR	But-ATTAAEK<But>QK<But>K<But>R-COOH	11	79	44	But			56_ATTAAEKQKKR	But
A0A2H1ZEH9		A0A2H1ZEH9_ARATH Cysteine proteinase inhibitor OS=Arabidopsis thaliana OX=3702 GN=CYSB PE=1	2	ALVGGVGDVPANQNSGEVESLAR	Ace-ALVGGVGDVPANQNSGEVESLAR-COOH	23	150	45	Ace		Ace	2_ALVGGVGDVPANQNSGEVESLAR
P46283		S17P_ARATH Sedoheptulose-1,7-bisphosphatase, chloroplastic OS=Arabidopsis thaliana OX=3702 GN=At3g55800 PE=2	384	LKNVPIGVTA	NH2-LK<But>NVPIGVTA-COOH	10	57	39	NH2			384_LKNVPIGVTA
A0A2H1ZEH9		A0A2H1ZEH9_ARATH Cysteine proteinase inhibitor OS=Arabidopsis thaliana OX=3702 GN=CYSB PE=1	2	ALVGGVGDVPANQNSGEVESLAR	Ace-ALVGGVGDVPANQNSGEVESLAR-COOH	23	102	45	Ace		Ace	2_ALVGGVGDVPANQNSGEVESLAR
Q9LSA3		RL303_ARATH 60S ribosomal protein L30-3 OS=Arabidopsis thaliana OX=3702 GN=RPL30C PE=3	99	PGDSDIIKTLPGDQ	NH2-PGDSDIIK<But4C13>TLPGDQ-COOH	14	55	46	NH2			99_PGDSDIIKTLPGDQ
Q9LF98		ALFC8_ARATH Fructose-bisphosphate aldolase 8, cytosolic OS=Arabidopsis thaliana OX=3702 GN=FBA8 PE=1	104	VDKGTVELAGTDGETTTQGLDGLGDR	NH2-VDK<But4C13>GTVELAGTDGETTTQGLDGLGDR-COOH	26	79	45	NH2			104_VDKGTVELAGTDGETTTQGLDGLGDR
F4J573		F4J573_ARATH Late embryogenesis abundant protein (LEA) family protein OS=Arabidopsis thaliana OX=3702 GN=At3g17520 PE=4	86	KAEEAVGAAKEKAGSA	NH2-K<But>AEEAVGAAK<But>EK<But>AGSA-COOH	16	46	45	NH2			86_KAEEAVGAAKEKAGSA
Q94BT9		ATOX1_ARATH Copper transport protein ATX1 OS=Arabidopsis thaliana OX=3702 GN=ATX1 PE=1	64	TAFWEAEGETAKA	NH2-TAFWEAEGETAK<But4C13>A-COOH	13	56	44	NH2			64_TAFWEAEGETAKA
A0A1P8AMM6	Q38951 (571-587)	A0A1P8AMM6_ARATH Protein phosphatase 2A subunit A3 OS=Arabidopsis thaliana OX=3702 GN=PP2AA3 PE=4	396	YFANQALQSIDNVMMSS	NH2-YFANQALQSIDNVM<Mox*>M<Mox*>SS-COOH	17	59	41	NH2			396_YFANQALQSIDNVMMSS
O49595		HMGB1_ARATH High mobility group B protein 1 OS=Arabidopsis thaliana OX=3702 GN=HMGB1 PE=1	137	SEINDEDEASGEEELLEKE	NH2-SEINDEDEASGEEELLEK<But>E-COOH	19	43	39	NH2			137_SEINDEDEASGEEELLEKE
A0A2H1ZEH9		A0A2H1ZEH9_ARATH Cysteine proteinase inhibitor OS=Arabidopsis thaliana OX=3702 GN=CYSB PE=1	2	ALVGGVGDVPANQNSGEVESLAR	Ace-ALVGGVGDVPANQNSGEVESLAR-COOH	23	113	45	Ace		Ace	2_ALVGGVGDVPANQNSGEVESLAR
O23676		MGN_ARATH Protein mago nashi homolog OS=Arabidopsis thaliana OX=3702 GN=MAGO PE=1	2	AAEEATEFYLR	Ace-AAEEATEFYLR-COOH	11	68	44	Ace		Ace	2_AAEEATEFYLR
A0A2H1ZEH9		A0A2H1ZEH9_ARATH Cysteine proteinase inhibitor OS=Arabidopsis thaliana OX=3702 GN=CYSB PE=1	2	ALVGGVGDVPANQNSGEVESLAR	Ace-ALVGGVGDVPANQNSGEVESLAR-COOH	23	72	45	Ace		Ace	2_ALVGGVGDVPANQNSGEVESLAR
Q9MAR2		Q9MAR2_ARATH At1g43860 OS=Arabidopsis thaliana OX=3702 GN=At1g43860 PE=2	2	SKTLVQPVGQKR	Ace-SK<But4C13>TLVQPVGQK<But4C13>R-COOH	12	49	40	Ace		Ace	2_SKTLVQPVGQKR
O49595	F4J5M5 (111-128)	HMGB1_ARATH High mobility group B protein 1 OS=Arabidopsis thaliana OX=3702 GN=HMGB1 PE=1	111	KAEYEKQMDAYNKNLEEG	NH2-K<But4C13>AEYEK<But4C13>QM<Mox*>DAYNK<But4C13>NLEEG-COOH	18	61	44	NH2			111_KAEYEKQMDAYNKNLEEG
P25851		F16P1_ARATH Fructose-1,6-bisphosphatase 1, chloroplastic OS=Arabidopsis thaliana OX=3702 GN=CFBP1 PE=1	60	AVAADAAETKTAAR	But-AVAADAAETK<But>TAAR-COOH	14	57	46	But			60_AVAADAAETKTAAR	But
P25851		F16P1_ARATH Fructose-1,6-bisphosphatase 1, chloroplastic OS=Arabidopsis thaliana OX=3702 GN=CFBP1 PE=1	60	AVAADAAETKTAAR	But4C13-AVAADAAETK<But4C13>TAAR-COOH	14	76	45	But4C13			60_AVAADAAETKTAAR	But
Q9SUB2		Q9SUB2_ARATH Late embryogenesis abundant protein (LEA) family protein OS=Arabidopsis thaliana OX=3702 GN=At4g21020 PE=2	250	KKKAEKDQKED	NH2-K<But4C13>K<But4C13>K<But4C13>AEK<But4C13>DQK<But4C13>ED-COOH	11	48	42	NH2			250_KKKAEKDQKED
P15459		2SS3_ARATH 2S seed storage protein 3 OS=Arabidopsis thaliana OX=3702 GN=AT2S3 PE=1	101	QEEPVCVCPTLKQAAR	NH2-Q<Pyr>EEPVC<Cmm*>VC<Cmm*>PTLK<But4C13>QAAR-COOH	16	51	45	NH2	Q<Pyr>		101_QEEPVCVCPTLKQAAR
Q9SIN3		Q9SIN3_ARATH Late embryogenesis abundant domain-containing protein / LEA domain-containing protein OS=Arabidopsis thaliana OX=3702 GN=At2g42560 PE=4	344	ASEYMTETGKQAGNVAAQKGQEAASMTAK	NH2-ASEYM<Mox*>TETGK<But4C13>QAGNVAAQK<But4C13>GQEAASM<Mox*>TAK<But4C13>-COOH	29	49	44	NH2			344_ASEYMTETGKQAGNVAAQKGQEAASMTAK
P15455	F4K8S2 (11-20)	CRU1_ARATH 12S seed storage protein CRA1 OS=Arabidopsis thaliana OX=3702 GN=CRA1 PE=1	198	PQGQVWLQGR	But-PQGQVWLQGR-COOH	10	52	45	But			198_PQGQVWLQGR	But
F4JBK4	O24658 (189-202)^AQ9SN84 (139-152)	F4JBK4_ARATH Chitinase family protein OS=Arabidopsis thaliana OX=3702 GN=At3g47540 PE=4	139	QPELVGSNPTVAFR	NH2-Q<Pyr>PELVGSNPTVAFR-COOH	14	62	45	NH2	Q<Pyr>		139_QPELVGSNPTVAFR
A0A1P8B7U7	Q9ZQX7 (1-9)	A0A1P8B7U7_ARATH Bax inhibitor-1 family protein OS=Arabidopsis thaliana OX=3702 GN=AtLFG3 PE=3	1	MYQWNLPYR	Ace-M<Mox*>YQWNLPYR-COOH	9	57	43	Ace		Ace	1_MYQWNLPYR
Q9SUB2		Q9SUB2_ARATH Late embryogenesis abundant protein (LEA) family protein OS=Arabidopsis thaliana OX=3702 GN=At4g21020 PE=2	250	KKKAEKDQKEDD	NH2-K<But4C13>K<But4C13>K<But4C13>AEK<But4C13>DQK<But4C13>EDD-COOH	12	50	44	NH2			250_KKKAEKDQKEDD
F4JBK4	O24658 (189-202)^AQ9SN84 (139-152)	F4JBK4_ARATH Chitinase family protein OS=Arabidopsis thaliana OX=3702 GN=At3g47540 PE=4	139	QPELVGSNPTVAFR	NH2-Q<Pyr>PELVGSNPTVAFR-COOH	14	61	45	NH2	Q<Pyr>		139_QPELVGSNPTVAFR
Q9LTV6		DECR2_ARATH Peroxisomal 2,4-dienoyl-CoA reductase OS=Arabidopsis thaliana OX=3702 GN=At3g12800 PE=2	1	MDSPFKPDVVR	Ace-M<Mox*>DSPFK<But4C13>PDVVR-COOH	11	69	45	Ace		Ace	1_MDSPFKPDVVR
Q9LTV6		DECR2_ARATH Peroxisomal 2,4-dienoyl-CoA reductase OS=Arabidopsis thaliana OX=3702 GN=At3g12800 PE=2	1	MDSPFKPDVVR	Ace-M<Mox*>DSPFK<But>PDVVR-COOH	11	75	45	Ace		Ace	1_MDSPFKPDVVR
Q94EG6		Y5224_ARATH Uncharacterized protein At5g02240 OS=Arabidopsis thaliana OX=3702 GN=At5g02240 PE=1	2	ANLPTVLVTGASGR	Ace-ANLPTVLVTGASGR-COOH	14	46	44	Ace		Ace	2_ANLPTVLVTGASGR
A0A2H1ZEH9		A0A2H1ZEH9_ARATH Cysteine proteinase inhibitor OS=Arabidopsis thaliana OX=3702 GN=CYSB PE=1	2	ALVGGVGDVPANQNSGEVESLAR	Ace-ALVGGVGDVPANQNSGEVESLAR-COOH	23	63	45	Ace		Ace	2_ALVGGVGDVPANQNSGEVESLAR
F4J573		F4J573_ARATH Late embryogenesis abundant protein (LEA) family protein OS=Arabidopsis thaliana OX=3702 GN=At3g17520 PE=4	251	ADETLESAKDKASQSYDSAAR	NH2-ADETLESAK<But4C13>DK<But4C13>ASQSYDSAAR-COOH	21	112	44	NH2			251_ADETLESAKDKASQSYDSAAR
F4J573		F4J573_ARATH Late embryogenesis abundant protein (LEA) family protein OS=Arabidopsis thaliana OX=3702 GN=At3g17520 PE=4	251	ADETLESAKDKASQSYDSAAR	NH2-ADETLESAK<But4C13>DK<But4C13>ASQSYDSAAR-COOH	21	65	44	NH2			251_ADETLESAKDKASQSYDSAAR
Q9SUB2		Q9SUB2_ARATH Late embryogenesis abundant protein (LEA) family protein OS=Arabidopsis thaliana OX=3702 GN=At4g21020 PE=2	250	KKKAEKDQKED	NH2-K<But>K<But>K<But>AEK<But>DQK<But>ED-COOH	11	48	45	NH2			250_KKKAEKDQKED
F4J573		F4J573_ARATH Late embryogenesis abundant protein (LEA) family protein OS=Arabidopsis thaliana OX=3702 GN=At3g17520 PE=4	251	ADETLESAKDKASQSYDSAAR	NH2-ADETLESAK<But4C13>DK<But4C13>ASQSYDSAAR-COOH	21	128	44	NH2			251_ADETLESAKDKASQSYDSAAR
B3H7G1	Q9SR67 (1-16)	B3H7G1_ARATH Plant/protein OS=Arabidopsis thaliana OX=3702 GN=At3g10020 PE=1	1	MQAVSVDETKNTVVLR	Ace-M<Mox*>QAVSVDETK<But4C13>NTVVLR-COOH	16	124	46	Ace		Ace	1_MQAVSVDETKNTVVLR
B3H7G1	Q9SR67 (1-16)	B3H7G1_ARATH Plant/protein OS=Arabidopsis thaliana OX=3702 GN=At3g10020 PE=1	1	MQAVSVDETKNTVVLR	Ace-M<Mox*>QAVSVDETK<But4C13>NTVVLR-COOH	16	97	46	Ace		Ace	1_MQAVSVDETKNTVVLR
P15455	F4K8S2 (11-20)	CRU1_ARATH 12S seed storage protein CRA1 OS=Arabidopsis thaliana OX=3702 GN=CRA1 PE=1	198	PQGQVWLQGR	But-PQGQVWLQGR-COOH	10	78	45	But			198_PQGQVWLQGR	But
A0A2H1ZEH9		A0A2H1ZEH9_ARATH Cysteine proteinase inhibitor OS=Arabidopsis thaliana OX=3702 GN=CYSB PE=1	2	ALVGGVGDVPANQNSGEVESLAR	Ace-ALVGGVGDVPANQNSGEVESLAR-COOH	23	56	45	Ace		Ace	2_ALVGGVGDVPANQNSGEVESLAR
A0A1P8B7U7	Q9ZQX7 (1-9)	A0A1P8B7U7_ARATH Bax inhibitor-1 family protein OS=Arabidopsis thaliana OX=3702 GN=AtLFG3 PE=3	1	MYQWNLPYR	Ace-M<Mox*>YQWNLPYR-COOH	9	52	43	Ace		Ace	1_MYQWNLPYR
Q84VY2		NET4B_ARATH Protein NETWORKED 4B OS=Arabidopsis thaliana OX=3702 GN=NET4B PE=2	2	ASSTAQSKKQFKR	Ace-ASSTAQSK<But4C13>K<But4C13>QFK<But4C13>R-COOH	13	47	44	Ace		Ace	2_ASSTAQSKKQFKR
F4JBK4	O24658 (189-202)^AQ9SN84 (139-152)	F4JBK4_ARATH Chitinase family protein OS=Arabidopsis thaliana OX=3702 GN=At3g47540 PE=4	139	QPELVGSNPTVAFR	NH2-Q<Pyr>PELVGSNPTVAFR-COOH	14	96	46	NH2	Q<Pyr>		139_QPELVGSNPTVAFR
F4JBK4	O24658 (189-202)^AQ9SN84 (139-152)	F4JBK4_ARATH Chitinase family protein OS=Arabidopsis thaliana OX=3702 GN=At3g47540 PE=4	139	QPELVGSNPTVAFR	NH2-QPELVGSNPTVAFR-COOH	14	46	46	NH2			139_QPELVGSNPTVAFR
A0A2H1ZEH9		A0A2H1ZEH9_ARATH Cysteine proteinase inhibitor OS=Arabidopsis thaliana OX=3702 GN=CYSB PE=1	2	ALVGGVGDVPANQNSGEVESLAR	Ace-ALVGGVGDVPANQNSGEVESLAR-COOH	23	88	45	Ace		Ace	2_ALVGGVGDVPANQNSGEVESLAR
F4HXW5	Q39133 (64-73)	F4HXW5_ARATH Polyketide cyclase/dehydrase and lipid transport superfamily protein OS=Arabidopsis thaliana OX=3702 GN=At1g14940 PE=4	48	GKPEVFKEKR	NH2-GK<But>PEVFK<But>EK<But>R-COOH	10	47	44	NH2			48_GKPEVFKEKR
O81822	P29830 (146-155)	HS177_ARATH 17.7 kDa class II heat shock protein OS=Arabidopsis thaliana OX=3702 GN=HSP17.7 PE=2	147	KPKTIQVQVA	NH2-K<But>PK<But>TIQVQVA-COOH	10	59	40	NH2			147_KPKTIQVQVA
F4HXW5	Q39133 (64-73)	F4HXW5_ARATH Polyketide cyclase/dehydrase and lipid transport superfamily protein OS=Arabidopsis thaliana OX=3702 GN=At1g14940 PE=4	48	GKPEVFKEKR	NH2-GK<But4C13>PEVFK<But4C13>EK<But4C13>R-COOH	10	47	41	NH2			48_GKPEVFKEKR
A8MR09	Q39250 (99-109)^AQ9ZSK3 (99-109)^AQ9ZSK4 (99-109)	A8MR09_ARATH Actin depolymerizing factor 1 OS=Arabidopsis thaliana OX=3702 GN=ADF1 PE=3	110	SKMIYASSKDR	But-SK<But>M<Mox*>IYASSK<But>DR-COOH	11	49	45	But			110_SKMIYASSKDR	But
Q9ZVL0		Q9ZVL0_ARATH Glycoprotein membrane GPI-anchored OS=Arabidopsis thaliana OX=3702 GN=T22H22.25 PE=2	29	NQAEDNLLQGLNSYR	NH2-NQAEDNLLQGLNSYR-COOH	15	70	44	NH2			29_NQAEDNLLQGLNSYR
Q9ZW31		HS17B_ARATH 17.6 kDa class I heat shock protein 2 OS=Arabidopsis thaliana OX=3702 GN=HSP17.6B PE=2	2	SMIPSFFNNNR	Ace-SM<Mox*>IPSFFNNNR-COOH	11	61	43	Ace		Ace	2_SMIPSFFNNNR
O81822	P29830 (146-155)	HS177_ARATH 17.7 kDa class II heat shock protein OS=Arabidopsis thaliana OX=3702 GN=HSP17.7 PE=2	147	KPKTIQVQVA	NH2-K<But4C13>PK<But4C13>TIQVQVA-COOH	10	76	38	NH2			147_KPKTIQVQVA
Q9SUB2		Q9SUB2_ARATH Late embryogenesis abundant protein (LEA) family protein OS=Arabidopsis thaliana OX=3702 GN=At4g21020 PE=2	218	NAAQTVTEAVVGPEEDAEKAR	NH2-NAAQTVTEAVVGPEEDAEK<But4C13>AR-COOH	21	53	45	NH2			218_NAAQTVTEAVVGPEEDAEKAR
B3H7G1	Q9SR67 (1-16)	B3H7G1_ARATH Plant/protein OS=Arabidopsis thaliana OX=3702 GN=At3g10020 PE=1	1	MQAVSVDETKNTVVLR	Ace-M<Mox*>QAVSVDETK<But4C13>NTVVLR-COOH	16	119	46	Ace		Ace	1_MQAVSVDETKNTVVLR
A0A2H1ZEH9		A0A2H1ZEH9_ARATH Cysteine proteinase inhibitor OS=Arabidopsis thaliana OX=3702 GN=CYSB PE=1	2	ALVGGVGDVPANQNSGEVESLAR	Ace-ALVGGVGDVPANQNSGEVESLAR-COOH	23	141	45	Ace		Ace	2_ALVGGVGDVPANQNSGEVESLAR
Q96253		ATP5E_ARATH ATP synthase subunit epsilon, mitochondrial OS=Arabidopsis thaliana OX=3702 GN=At1g51650 PE=1	2	ASNAAVPFWR	Ace-ASNAAVPFWR-COOH	10	46	46	Ace		Ace	2_ASNAAVPFWR
A0A1P8AWT7	B9DG18 (21-37)^AF4HUL6 (21-37)^AQ42547 (21-37)	A0A1P8AWT7_ARATH Catalase 3 OS=Arabidopsis thaliana OX=3702 GN=CAT3 PE=1	80	GGAPVSNNISSLTIGER	But-GGAPVSNNISSLTIGER-COOH	17	52	46	But			80_GGAPVSNNISSLTIGER	But
P15455	F4K8S2 (11-20)	CRU1_ARATH 12S seed storage protein CRA1 OS=Arabidopsis thaliana OX=3702 GN=CRA1 PE=1	198	PQGQVWLQGR	But4C13-PQGQVWLQGR-COOH	10	54	46	But4C13			198_PQGQVWLQGR	But
Q94EG6		Y5224_ARATH Uncharacterized protein At5g02240 OS=Arabidopsis thaliana OX=3702 GN=At5g02240 PE=1	2	ANLPTVLVTGASGR	Ace-ANLPTVLVTGASGR-COOH	14	59	44	Ace		Ace	2_ANLPTVLVTGASGR
B3H7G1	Q9SR67 (1-16)	B3H7G1_ARATH Plant/protein OS=Arabidopsis thaliana OX=3702 GN=At3g10020 PE=1	1	MQAVSVDETKNTVVLR	Ace-M<Mox*>QAVSVDETK<But4C13>NTVVLR-COOH	16	142	46	Ace		Ace	1_MQAVSVDETKNTVVLR
Q9SIN3		Q9SIN3_ARATH Late embryogenesis abundant domain-containing protein / LEA domain-containing protein OS=Arabidopsis thaliana OX=3702 GN=At2g42560 PE=4	579	YVEEEGVGAGGVLGAIG	NH2-YVEEEGVGAGGVLGAIG-COOH	17	103	45	NH2			579_YVEEEGVGAGGVLGAIG
A0A1P8BD35	Q9M042 (13-21)	A0A1P8BD35_ARATH PEBP (Phosphatidylethanolamine-binding protein) family protein OS=Arabidopsis thaliana OX=3702 GN=At5g01300 PE=4	13	IDNDGKLPR	But-IDNDGK<But>LPR-COOH	9	55	45	But			13_IDNDGKLPR	But
F4JD96	Q9FKC0 (43-54)^AQ9LRX8 (43-54)^AQ9SFU1 (43-54)^AQ9SVR0 (43-54)	F4JD96_ARATH Ribosomal protein L13 family protein OS=Arabidopsis thaliana OX=3702 GN=At3g07110 PE=3	43	CEEICLSGGLVR	NH2-C<Cmm*>EEIC<Cmm*>LSGGLVR-COOH	12	50	44	NH2			43_CEEICLSGGLVR
A0A2H1ZEH9		A0A2H1ZEH9_ARATH Cysteine proteinase inhibitor OS=Arabidopsis thaliana OX=3702 GN=CYSB PE=1	2	ALVGGVGDVPANQNSGEVESLAR	Ace-ALVGGVGDVPANQNSGEVESLAR-COOH	23	82	45	Ace		Ace	2_ALVGGVGDVPANQNSGEVESLAR
O81822	P29830 (146-155)	HS177_ARATH 17.7 kDa class II heat shock protein OS=Arabidopsis thaliana OX=3702 GN=HSP17.7 PE=2	147	KPKTIQVQVA	NH2-K<But4C13>PK<But4C13>TIQVQVA-COOH	10	59	38	NH2			147_KPKTIQVQVA
Q9ASV6		RR20_ARATH 30S ribosomal protein S20, chloroplastic OS=Arabidopsis thaliana OX=3702 GN=RPS20 PE=2	79	EAAAPTKKADSAAKR	But4C13-EAAAPTK<But4C13>K<But4C13>ADSAAK<But4C13>R-COOH	15	79	43	But4C13			79_EAAAPTKKADSAAKR	But
Q96253		ATP5E_ARATH ATP synthase subunit epsilon, mitochondrial OS=Arabidopsis thaliana OX=3702 GN=At1g51650 PE=1	2	ASNAAVPFWR	Ace-ASNAAVPFWR-COOH	10	64	45	Ace		Ace	2_ASNAAVPFWR
Q9ASV6		RR20_ARATH 30S ribosomal protein S20, chloroplastic OS=Arabidopsis thaliana OX=3702 GN=RPS20 PE=2	79	EAAAPTKKADSAAKR	But-EAAAPTK<But>K<But>ADSAAK<But>R-COOH	15	91	44	But			79_EAAAPTKKADSAAKR	But
A0A2H1ZEH9	Q8H0X6 (44-57)	A0A2H1ZEH9_ARATH Cysteine proteinase inhibitor OS=Arabidopsis thaliana OX=3702 GN=CYSB PE=1	11	PANQNSGEVESLAR	NH2-PANQNSGEVESLAR-COOH	14	82	44	NH2			11_PANQNSGEVESLAR
A0A2H1ZEH9		A0A2H1ZEH9_ARATH Cysteine proteinase inhibitor OS=Arabidopsis thaliana OX=3702 GN=CYSB PE=1	2	ALVGGVGDVPANQNSGEVESLAR	Ace-ALVGGVGDVPANQNSGEVESLAR-COOH	23	146	45	Ace		Ace	2_ALVGGVGDVPANQNSGEVESLAR
Q9LV09		BOB1_ARATH Protein BOBBER 1 OS=Arabidopsis thaliana OX=3702 GN=BOB1 PE=1	2	AIISEVEEESSSSR	Ace-AIISEVEEESSSSR-COOH	14	86	44	Ace		Ace	2_AIISEVEEESSSSR
A0A2H1ZEH9	Q8H0X6 (35-57)	A0A2H1ZEH9_ARATH Cysteine proteinase inhibitor OS=Arabidopsis thaliana OX=3702 GN=CYSB PE=1	2	ALVGGVGDVPANQNSGEVESLAR	But4C13-ALVGGVGDVPANQNSGEVESLAR-COOH	23	66	45	But4C13			2_ALVGGVGDVPANQNSGEVESLAR	But
Q84R10		PME36_ARATH Probable pectinesterase/pectinesterase inhibitor 36 OS=Arabidopsis thaliana OX=3702 GN=PME36 PE=2	191	GGMLVSWNPTSSR	But4C13-GGM<Mox*>LVSWNPTSSR-COOH	13	47	44	But4C13			191_GGMLVSWNPTSSR	But
Q84R10		PME36_ARATH Probable pectinesterase/pectinesterase inhibitor 36 OS=Arabidopsis thaliana OX=3702 GN=PME36 PE=2	191	GGMLVSWNPTSSR	But-GGM<Mox*>LVSWNPTSSR-COOH	13	64	44	But			191_GGMLVSWNPTSSR	But
Q9LV09		BOB1_ARATH Protein BOBBER 1 OS=Arabidopsis thaliana OX=3702 GN=BOB1 PE=1	2	AIISEVEEESSSSR	Ace-AIISEVEEESSSSR-COOH	14	93	44	Ace		Ace	2_AIISEVEEESSSSR
O24456		GBLPA_ARATH Receptor for activated C kinase 1A OS=Arabidopsis thaliana OX=3702 GN=RACK1A PE=1	2	AEGLVLKGTMR	Ace-AEGLVLK<But4C13>GTM<Mox*>R-COOH	11	52	45	Ace		Ace	2_AEGLVLKGTMR
A0A2H1ZEH9		A0A2H1ZEH9_ARATH Cysteine proteinase inhibitor OS=Arabidopsis thaliana OX=3702 GN=CYSB PE=1	2	ALVGGVGDVPANQNSGEVESLAR	Ace-ALVGGVGDVPANQNSGEVESLAR-COOH	23	90	45	Ace		Ace	2_ALVGGVGDVPANQNSGEVESLAR
Q9FNX5		DRP1E_ARATH Dynamin-related protein 1E OS=Arabidopsis thaliana OX=3702 GN=DRP1E PE=1	2	TTMESLIGLVNR	Ace-TTM<Mox*>ESLIGLVNR-COOH	12	79	46	Ace		Ace	2_TTMESLIGLVNR
A0A2H1ZEH9		A0A2H1ZEH9_ARATH Cysteine proteinase inhibitor OS=Arabidopsis thaliana OX=3702 GN=CYSB PE=1	2	ALVGGVGDVPANQNSGEVESLAR	Ace-ALVGGVGDVPANQNSGEVESLAR-COOH	23	138	45	Ace		Ace	2_ALVGGVGDVPANQNSGEVESLAR
Q67YI9		EPN2_ARATH Clathrin interactor EPSIN 2 OS=Arabidopsis thaliana OX=3702 GN=EPSIN2 PE=1	1	MKKVFGQTVR	Ace-M<Mox*>K<But4C13>K<But4C13>VFGQTVR-COOH	10	60	45	Ace		Ace	1_MKKVFGQTVR
F4HTY0		F4HTY0_ARATH SNARE-like superfamily protein OS=Arabidopsis thaliana OX=3702 GN=At1g80500 PE=4	2	ANTACFIIVGR	Ace-ANTAC<Cmm*>FIIVGR-COOH	11	68	46	Ace		Ace	2_ANTACFIIVGR
Q9FNX5		DRP1E_ARATH Dynamin-related protein 1E OS=Arabidopsis thaliana OX=3702 GN=DRP1E PE=1	2	TTMESLIGLVNR	Ace-TTM<Mox*>ESLIGLVNR-COOH	12	57	45	Ace		Ace	2_TTMESLIGLVNR
O24456		GBLPA_ARATH Receptor for activated C kinase 1A OS=Arabidopsis thaliana OX=3702 GN=RACK1A PE=1	2	AEGLVLKGTMR	Ace-AEGLVLK<But4C13>GTM<Mox*>R-COOH	11	63	45	Ace		Ace	2_AEGLVLKGTMR
A0A2H1ZEH9		A0A2H1ZEH9_ARATH Cysteine proteinase inhibitor OS=Arabidopsis thaliana OX=3702 GN=CYSB PE=1	2	ALVGGVGDVPANQNSGEVESLAR	Ace-ALVGGVGDVPANQNSGEVESLAR-COOH	23	87	45	Ace		Ace	2_ALVGGVGDVPANQNSGEVESLAR
Q9FNX5		DRP1E_ARATH Dynamin-related protein 1E OS=Arabidopsis thaliana OX=3702 GN=DRP1E PE=1	2	TTMESLIGLVNR	Ace-TTM<Mox*>ESLIGLVNR-COOH	12	77	46	Ace		Ace	2_TTMESLIGLVNR
A0A2H1ZEH9	Q8H0X6 (44-57)	A0A2H1ZEH9_ARATH Cysteine proteinase inhibitor OS=Arabidopsis thaliana OX=3702 GN=CYSB PE=1	11	PANQNSGEVESLAR	NH2-PANQNSGEVESLAR-COOH	14	83	44	NH2			11_PANQNSGEVESLAR
A0A2H1ZEH9	Q8H0X6 (44-57)	A0A2H1ZEH9_ARATH Cysteine proteinase inhibitor OS=Arabidopsis thaliana OX=3702 GN=CYSB PE=1	11	PANQNSGEVESLAR	NH2-PANQNSGEVESLAR-COOH	14	106	44	NH2			11_PANQNSGEVESLAR
A0A2H1ZEH9		A0A2H1ZEH9_ARATH Cysteine proteinase inhibitor OS=Arabidopsis thaliana OX=3702 GN=CYSB PE=1	2	ALVGGVGDVPANQNSGEVESLAR	Ace-ALVGGVGDVPANQNSGEVESLAR-COOH	23	132	45	Ace		Ace	2_ALVGGVGDVPANQNSGEVESLAR
A0A2H1ZEH9	Q8H0X6 (44-57)	A0A2H1ZEH9_ARATH Cysteine proteinase inhibitor OS=Arabidopsis thaliana OX=3702 GN=CYSB PE=1	11	PANQNSGEVESLAR	NH2-PANQNSGEVESLAR-COOH	14	113	44	NH2			11_PANQNSGEVESLAR
A0A2H1ZEH9	Q8H0X6 (38-57)	A0A2H1ZEH9_ARATH Cysteine proteinase inhibitor OS=Arabidopsis thaliana OX=3702 GN=CYSB PE=1	5	GGVGDVPANQNSGEVESLAR	NH2-GGVGDVPANQNSGEVESLAR-COOH	20	85	45	NH2			5_GGVGDVPANQNSGEVESLAR
A0A2H1ZEH9	Q8H0X6 (44-57)	A0A2H1ZEH9_ARATH Cysteine proteinase inhibitor OS=Arabidopsis thaliana OX=3702 GN=CYSB PE=1	11	PANQNSGEVESLAR	NH2-PANQNSGEVESLAR-COOH	14	92	44	NH2			11_PANQNSGEVESLAR
Q9LVT8		RGGC_ARATH RGG repeats nuclear RNA binding protein C OS=Arabidopsis thaliana OX=3702 GN=RGGC PE=1	341	EAAAPAIGDTAQFPSLG	NH2-EAAAPAIGDTAQFPSLG-COOH	17	47	45	NH2			341_EAAAPAIGDTAQFPSLG
A0A2H1ZEH9		A0A2H1ZEH9_ARATH Cysteine proteinase inhibitor OS=Arabidopsis thaliana OX=3702 GN=CYSB PE=1	2	ALVGGVGDVPANQNSGEVESLAR	Ace-ALVGGVGDVPANQNSGEVESLAR-COOH	23	100	45	Ace		Ace	2_ALVGGVGDVPANQNSGEVESLAR
A0A2H1ZEH9	Q8H0X6 (44-57)	A0A2H1ZEH9_ARATH Cysteine proteinase inhibitor OS=Arabidopsis thaliana OX=3702 GN=CYSB PE=1	11	PANQNSGEVESLAR	NH2-PANQNSGEVESLAR-COOH	14	104	44	NH2			11_PANQNSGEVESLAR
A0A2H1ZEH9		A0A2H1ZEH9_ARATH Cysteine proteinase inhibitor OS=Arabidopsis thaliana OX=3702 GN=CYSB PE=1	2	ALVGGVGDVPANQNSGEVESLAR	Ace-ALVGGVGDVPANQNSGEVESLAR-COOH	23	145	45	Ace		Ace	2_ALVGGVGDVPANQNSGEVESLAR
Q93YR3		F10AL_ARATH FAM10 family protein At4g22670 OS=Arabidopsis thaliana OX=3702 GN=At4g22670 PE=1	179	DANAALEINPDSAKGYKSR	NH2-DANAALEINPDSAK<But4C13>GYK<But4C13>SR-COOH	19	58	45	NH2			179_DANAALEINPDSAKGYKSR
Q93YR3		F10AL_ARATH FAM10 family protein At4g22670 OS=Arabidopsis thaliana OX=3702 GN=At4g22670 PE=1	179	DANAALEINPDSAKGYKSR	NH2-DANAALEINPDSAK<But4C13>GYK<But4C13>SR-COOH	19	63	45	NH2			179_DANAALEINPDSAKGYKSR
P15459		2SS3_ARATH 2S seed storage protein 3 OS=Arabidopsis thaliana OX=3702 GN=AT2S3 PE=1	131	KIYQSAKYLPN	NH2-K<But4C13>IYQSAK<But4C13>YLPN-COOH	11	54	44	NH2			131_KIYQSAKYLPN
Q9ZWA9		CRU4_ARATH 12S seed storage protein CRD OS=Arabidopsis thaliana OX=3702 GN=CRD PE=1	396	TNDNAYINTLSGQTSYLR	NH2-TNDNAYINTLSGQTSYLR-COOH	18	96	44	NH2			396_TNDNAYINTLSGQTSYLR
A0A2H1ZEH9		A0A2H1ZEH9_ARATH Cysteine proteinase inhibitor OS=Arabidopsis thaliana OX=3702 GN=CYSB PE=1	2	ALVGGVGDVPANQNSGEVESLAR	Ace-ALVGGVGDVPANQNSGEVESLAR-COOH	23	89	45	Ace		Ace	2_ALVGGVGDVPANQNSGEVESLAR
Q9LP53		Q9LP53_ARATH Alba DNA/RNA-binding protein OS=Arabidopsis thaliana OX=3702 GN=At1g29250 PE=1	1	MEEITEGVNNMNLAVDTQKKNR	Ace-M<Mox*>EEITEGVNNM<Mox*>NLAVDTQK<But4C13>K<But4C13>NR-COOH	22	87	44	Ace		Ace	1_MEEITEGVNNMNLAVDTQKKNR
Q9LP53		Q9LP53_ARATH Alba DNA/RNA-binding protein OS=Arabidopsis thaliana OX=3702 GN=At1g29250 PE=1	1	MEEITEGVNNMNLAVDTQKKNR	Ace-M<Mox*>EEITEGVNNM<Mox*>NLAVDTQK<But>K<But>NR-COOH	22	65	44	Ace		Ace	1_MEEITEGVNNMNLAVDTQKKNR
Q9LP53		Q9LP53_ARATH Alba DNA/RNA-binding protein OS=Arabidopsis thaliana OX=3702 GN=At1g29250 PE=1	1	MEEITEGVNNMNLAVDTQKKNR	Ace-M<Mox*>EEITEGVNNM<Mox*>NLAVDTQK<But4C13>K<But4C13>NR-COOH	22	149	44	Ace		Ace	1_MEEITEGVNNMNLAVDTQKKNR
P15459		2SS3_ARATH 2S seed storage protein 3 OS=Arabidopsis thaliana OX=3702 GN=AT2S3 PE=1	131	KIYQSAKYLPN	NH2-K<But>IYQSAK<But>YLPN-COOH	11	59	45	NH2			131_KIYQSAKYLPN
P15456		CRU2_ARATH 12S seed storage protein CRB OS=Arabidopsis thaliana OX=3702 GN=CRB PE=1	102	VIPGCAETFMESPVFGEGQGQGQSQGFR	NH2-VIPGC<Cmm*>AETFM<Mox*>ESPVFGEGQGQGQSQGFR-COOH	28	69	39	NH2			102_VIPGCAETFMESPVFGEGQGQGQSQGFR
B9DG73	F4J7I5 (2-34)^AF4J8J7 (2-34)^AQ9SF06 (2-34)	B9DG73_ARATH AT3G11930 protein OS=Arabidopsis thaliana OX=3702 GN=At3g11930 PE=1	2	AEEQAATAMETSAVEKQPETTTEAEAPSLTTKR	Ace-AEEQAATAM<Mox*>ETSAVEK<But4C13>QPETTTEAEAPSLTTK<But4C13>R-COOH	33	57	44	Ace		Ace	2_AEEQAATAMETSAVEKQPETTTEAEAPSLTTKR
B9DG73	F4J7I5 (2-34)^AF4J8J7 (2-34)^AQ9SF06 (2-34)	B9DG73_ARATH AT3G11930 protein OS=Arabidopsis thaliana OX=3702 GN=At3g11930 PE=1	2	AEEQAATAMETSAVEKQPETTTEAEAPSLTTKR	Ace-AEEQAATAM<Mox*>ETSAVEK<But4C13>QPETTTEAEAPSLTTK<But4C13>R-COOH	33	82	43	Ace		Ace	2_AEEQAATAMETSAVEKQPETTTEAEAPSLTTKR
B9DG73	F4J7I5 (2-34)^AF4J8J7 (2-34)^AQ9SF06 (2-34)	B9DG73_ARATH AT3G11930 protein OS=Arabidopsis thaliana OX=3702 GN=At3g11930 PE=1	2	AEEQAATAMETSAVEKQPETTTEAEAPSLTTKR	Ace-AEEQAATAM<Mox*>ETSAVEK<But>QPETTTEAEAPSLTTK<But>R-COOH	33	112	43	Ace		Ace	2_AEEQAATAMETSAVEKQPETTTEAEAPSLTTKR
A0A2H1ZEH9		A0A2H1ZEH9_ARATH Cysteine proteinase inhibitor OS=Arabidopsis thaliana OX=3702 GN=CYSB PE=1	2	ALVGGVGDVPANQNSGEVESLAR	Ace-ALVGGVGDVPANQNSGEVESLAR-COOH	23	143	45	Ace		Ace	2_ALVGGVGDVPANQNSGEVESLAR
Q9LP53		Q9LP53_ARATH Alba DNA/RNA-binding protein OS=Arabidopsis thaliana OX=3702 GN=At1g29250 PE=1	1	MEEITEGVNNMNLAVDTQKKNR	Ace-M<Mox*>EEITEGVNNM<Mox*>NLAVDTQK<But>K<But>NR-COOH	22	70	44	Ace		Ace	1_MEEITEGVNNMNLAVDTQKKNR
P15459		2SS3_ARATH 2S seed storage protein 3 OS=Arabidopsis thaliana OX=3702 GN=AT2S3 PE=1	131	KIYQSAKYLPN	NH2-K<But>IYQSAK<But>YLPN-COOH	11	46	45	NH2			131_KIYQSAKYLPN
P15455	F4K8S2 (3-20)	CRU1_ARATH 12S seed storage protein CRA1 OS=Arabidopsis thaliana OX=3702 GN=CRA1 PE=1	190	PFYLAGNNPQGQVWLQGR	NH2-PFYLAGNNPQGQVWLQGR-COOH	18	116	46	NH2			190_PFYLAGNNPQGQVWLQGR
B9DG73	F4J7I5 (2-34)^AF4J8J7 (2-34)^AQ9SF06 (2-34)	B9DG73_ARATH AT3G11930 protein OS=Arabidopsis thaliana OX=3702 GN=At3g11930 PE=1	2	AEEQAATAMETSAVEKQPETTTEAEAPSLTTKR	Ace-AEEQAATAM<Mox*>ETSAVEK<But>QPETTTEAEAPSLTTK<But>R-COOH	33	93	43	Ace		Ace	2_AEEQAATAMETSAVEKQPETTTEAEAPSLTTKR
O81822	P29830 (146-155)	HS177_ARATH 17.7 kDa class II heat shock protein OS=Arabidopsis thaliana OX=3702 GN=HSP17.7 PE=2	147	KPKTIQVQVA	NH2-K<But4C13>PK<But4C13>TIQVQVA-COOH	10	52	38	NH2			147_KPKTIQVQVA
O81822	P29830 (146-155)	HS177_ARATH 17.7 kDa class II heat shock protein OS=Arabidopsis thaliana OX=3702 GN=HSP17.7 PE=2	147	KPKTIQVQVA	NH2-K<But4C13>PK<But4C13>TIQVQVA-COOH	10	50	38	NH2			147_KPKTIQVQVA
A0A2H1ZEH9		A0A2H1ZEH9_ARATH Cysteine proteinase inhibitor OS=Arabidopsis thaliana OX=3702 GN=CYSB PE=1	2	ALVGGVGDVPANQNSGEVESLAR	Ace-ALVGGVGDVPANQNSGEVESLAR-COOH	23	63	45	Ace		Ace	2_ALVGGVGDVPANQNSGEVESLAR
P15456		CRU2_ARATH 12S seed storage protein CRB OS=Arabidopsis thaliana OX=3702 GN=CRB PE=1	114	PVFGEGQGQGQSQGFR	But-PVFGEGQGQGQSQGFR-COOH	16	59	44	But			114_PVFGEGQGQGQSQGFR	But
Q8LCW9	Q8LEQ0 (55-82)	RLA11_ARATH 60S acidic ribosomal protein P1-1 OS=Arabidopsis thaliana OX=3702 GN=RPP1A PE=3	55	NVTDLIMNVGAGGGGGAPVAAAAPAAGG	NH2-NVTDLIM<Mox*>NVGAGGGGGAPVAAAAPAAGG-COOH	28	59	45	NH2			55_NVTDLIMNVGAGGGGGAPVAAAAPAAGG
B3H7G1	Q9SR67 (1-16)	B3H7G1_ARATH Plant/protein OS=Arabidopsis thaliana OX=3702 GN=At3g10020 PE=1	1	MQAVSVDETKNTVVLR	Ace-M<Mox*>QAVSVDETK<But4C13>NTVVLR-COOH	16	75	46	Ace		Ace	1_MQAVSVDETKNTVVLR
A0A2H1ZEH9		A0A2H1ZEH9_ARATH Cysteine proteinase inhibitor OS=Arabidopsis thaliana OX=3702 GN=CYSB PE=1	2	ALVGGVGDVPANQNSGEVESLAR	Ace-ALVGGVGDVPANQNSGEVESLAR-COOH	23	86	45	Ace		Ace	2_ALVGGVGDVPANQNSGEVESLAR
A0A2H1ZEH9		A0A2H1ZEH9_ARATH Cysteine proteinase inhibitor OS=Arabidopsis thaliana OX=3702 GN=CYSB PE=1	2	ALVGGVGDVPANQNSGEVESLAR	Ace-ALVGGVGDVPANQNSGEVESLAR-COOH	23	88	45	Ace		Ace	2_ALVGGVGDVPANQNSGEVESLAR
P15456		CRU2_ARATH 12S seed storage protein CRB OS=Arabidopsis thaliana OX=3702 GN=CRB PE=1	325	KNAMVLPQWNVN	NH2-K<But>NAM<Mox*>VLPQWNVN-COOH	12	51	45	NH2			325_KNAMVLPQWNVN
Q56WD9		THIK2_ARATH 3-ketoacyl-CoA thiolase 2, peroxisomal OS=Arabidopsis thaliana OX=3702 GN=PED1 PE=1	450	KVEAQGLLSKD	NH2-K<But>VEAQGLLSK<But>D-COOH	11	52	45	NH2			450_KVEAQGLLSKD
A0A1P8B636	A0A1P8B637 (22-34)^AQ944B0 (68-80)	A0A1P8B636_ARATH Peptidylprolyl isomerase OS=Arabidopsis thaliana OX=3702 GN=At4g26555 PE=4	68	APVPQMKEPEVIR	But4C13-APVPQM<Mox*>K<But4C13>EPEVIR-COOH	13	47	45	But4C13			68_APVPQMKEPEVIR	But
P15456		CRU2_ARATH 12S seed storage protein CRB OS=Arabidopsis thaliana OX=3702 GN=CRB PE=1	162	LILVAAADLASNQNQLDR	NH2-LILVAAADLASNQNQLDR-COOH	18	49	45	NH2			162_LILVAAADLASNQNQLDR
A0A1I9LR04	Q94JX9 (155-181)	A0A1I9LR04_ARATH Nascent polypeptide-associated complex subunit alpha-like protein 2 OS=Arabidopsis thaliana OX=3702 GN=NACA2 PE=1	155	AEASTATVEAQVEEDEEEIDETGVEAR	NH2-AEASTATVEAQVEEDEEEIDETGVEAR-COOH	27	44	40	NH2			155_AEASTATVEAQVEEDEEEIDETGVEAR
Q9ZRT5		GSTT1_ARATH Glutathione S-transferase T1 OS=Arabidopsis thaliana OX=3702 GN=GSTT1 PE=2	1	MMKLKVYADR	Ace-M<Mox*>M<Mox*>K<But4C13>LK<But4C13>VYADR-COOH	10	48	46	Ace		Ace	1_MMKLKVYADR
Q84L30		RD23D_ARATH Ubiquitin receptor RAD23d OS=Arabidopsis thaliana OX=3702 GN=RAD23D PE=1	304	LINEPVEGEENVMEQLEAAMPQAVTVTPEER	NH2-LINEPVEGEENVM<Mox*>EQLEAAM<Mox*>PQAVTVTPEER-COOH	31	91	43	NH2			304_LINEPVEGEENVMEQLEAAMPQAVTVTPEER
A0A2H1ZEH9		A0A2H1ZEH9_ARATH Cysteine proteinase inhibitor OS=Arabidopsis thaliana OX=3702 GN=CYSB PE=1	2	ALVGGVGDVPANQNSGEVESLAR	Ace-ALVGGVGDVPANQNSGEVESLAR-COOH	23	145	45	Ace		Ace	2_ALVGGVGDVPANQNSGEVESLAR
A0A2H1ZEH9		A0A2H1ZEH9_ARATH Cysteine proteinase inhibitor OS=Arabidopsis thaliana OX=3702 GN=CYSB PE=1	2	ALVGGVGDVPANQNSGEVESLAR	Ace-ALVGGVGDVPANQNSGEVESLAR-COOH	23	88	45	Ace		Ace	2_ALVGGVGDVPANQNSGEVESLAR
Q9SIN3		Q9SIN3_ARATH Late embryogenesis abundant domain-containing protein / LEA domain-containing protein OS=Arabidopsis thaliana OX=3702 GN=At2g42560 PE=4	238	AKESVGEGAQKAGSATSEKAQR	But4C13-AK<But4C13>ESVGEGAQK<But4C13>AGSATSEK<But4C13>AQR-COOH	22	77	45	But4C13			238_AKESVGEGAQKAGSATSEKAQR	But
Q84L30		RD23D_ARATH Ubiquitin receptor RAD23d OS=Arabidopsis thaliana OX=3702 GN=RAD23D PE=1	315	VMEQLEAAMPQAVTVTPEER	But4C13-VM<Mox*>EQLEAAM<Mox*>PQAVTVTPEER-COOH	20	67	44	But4C13			315_VMEQLEAAMPQAVTVTPEER	But
Q94EG6		Y5224_ARATH Uncharacterized protein At5g02240 OS=Arabidopsis thaliana OX=3702 GN=At5g02240 PE=1	2	ANLPTVLVTGASGR	Ace-ANLPTVLVTGASGR-COOH	14	51	44	Ace		Ace	2_ANLPTVLVTGASGR
Q42029		PSBP1_ARATH Oxygen-evolving enhancer protein 2-1, chloroplastic OS=Arabidopsis thaliana OX=3702 GN=PSBP1 PE=1	251	KFVESAATSFSVA	NH2-K<But4C13>FVESAATSFSVA-COOH	13	51	46	NH2			251_KFVESAATSFSVA
A0A2H1ZEH9		A0A2H1ZEH9_ARATH Cysteine proteinase inhibitor OS=Arabidopsis thaliana OX=3702 GN=CYSB PE=1	2	ALVGGVGDVPANQNSGEVESLAR	Ace-ALVGGVGDVPANQNSGEVESLAR-COOH	23	49	45	Ace		Ace	2_ALVGGVGDVPANQNSGEVESLAR
Q9FK28		MEM12_ARATH Membrin-12 OS=Arabidopsis thaliana OX=3702 GN=MEMB12 PE=2	2	ASGTVGGLSEVYSSAKR	Ace-ASGTVGGLSEVYSSAK<But4C13>R-COOH	17	90	45	Ace		Ace	2_ASGTVGGLSEVYSSAKR
Q9SIN3		Q9SIN3_ARATH Late embryogenesis abundant domain-containing protein / LEA domain-containing protein OS=Arabidopsis thaliana OX=3702 GN=At2g42560 PE=4	238	AKESVGEGAQKAGSATSEKAQR	But-AK<But>ESVGEGAQK<But>AGSATSEK<But>AQR-COOH	22	104	45	But			238_AKESVGEGAQKAGSATSEKAQR	But
P15459		2SS3_ARATH 2S seed storage protein 3 OS=Arabidopsis thaliana OX=3702 GN=AT2S3 PE=1	81	DFEGPQQGYQLLQQCCNELR	NH2-DFEGPQQGYQLLQQC<Cmm*>C<Cmm*>NELR-COOH	20	107	40	NH2			81_DFEGPQQGYQLLQQCCNELR
P15459		2SS3_ARATH 2S seed storage protein 3 OS=Arabidopsis thaliana OX=3702 GN=AT2S3 PE=1	81	DFEGPQQGYQLLQQCCNELR	NH2-DFEGPQQGYQLLQQC<Cmm*>C<Cmm*>NELR-COOH	20	85	41	NH2			81_DFEGPQQGYQLLQQCCNELR
P15459		2SS3_ARATH 2S seed storage protein 3 OS=Arabidopsis thaliana OX=3702 GN=AT2S3 PE=1	81	DFEGPQQGYQLLQQCCNELR	NH2-DFEGPQQGYQLLQQC<Cmm*>C<Cmm*>NELR-COOH	20	114	40	NH2			81_DFEGPQQGYQLLQQCCNELR
A8MQP1	F4JTV4 (2-12)^AO23255 (2-12)^AQ9LK36 (2-12)	A8MQP1_ARATH S-adenosyl-L-homocysteine hydrolase OS=Arabidopsis thaliana OX=3702 GN=HOG1 PE=4	2	ALLVEKTSSGR	Ace-ALLVEK<But4C13>TSSGR-COOH	11	52	44	Ace		Ace	2_ALLVEKTSSGR
Q9SKP0	A0A1P8B189 (344-357)	ECP63_ARATH Late embryogenesis abundant protein ECP63 OS=Arabidopsis thaliana OX=3702 GN=ECP63 PE=2	344	AQKAEETKDSAAVR	But4C13-AQK<But4C13>AEETK<But4C13>DSAAVR-COOH	14	61	45	But4C13			344_AQKAEETKDSAAVR	But
Q94EG6		Y5224_ARATH Uncharacterized protein At5g02240 OS=Arabidopsis thaliana OX=3702 GN=At5g02240 PE=1	2	ANLPTVLVTGASGR	Ace-ANLPTVLVTGASGR-COOH	14	51	45	Ace		Ace	2_ANLPTVLVTGASGR
P15459		2SS3_ARATH 2S seed storage protein 3 OS=Arabidopsis thaliana OX=3702 GN=AT2S3 PE=1	81	DFEGPQQGYQLLQQCCNELR	NH2-DFEGPQQGYQLLQQC<Cmm*>C<Cmm*>NELR-COOH	20	171	40	NH2			81_DFEGPQQGYQLLQQCCNELR
Q84L30		RD23D_ARATH Ubiquitin receptor RAD23d OS=Arabidopsis thaliana OX=3702 GN=RAD23D PE=1	304	LINEPVEGEENVMEQLEAAMPQAVTVTPEER	NH2-LINEPVEGEENVM<Mox*>EQLEAAM<Mox*>PQAVTVTPEER-COOH	31	91	43	NH2			304_LINEPVEGEENVMEQLEAAMPQAVTVTPEER
O80934		Y2766_ARATH Uncharacterized protein At2g37660, chloroplastic OS=Arabidopsis thaliana OX=3702 GN=At2g37660 PE=1	229	KAEQYLADSGIPY	NH2-K<But4C13>AEQYLADSGIPY-COOH	13	58	45	NH2			229_KAEQYLADSGIPY
P15459		2SS3_ARATH 2S seed storage protein 3 OS=Arabidopsis thaliana OX=3702 GN=AT2S3 PE=1	81	DFEGPQQGYQLLQQCCNELR	NH2-DFEGPQQGYQLLQQC<Cmm*>C<Cmm*>NELR-COOH	20	95	39	NH2			81_DFEGPQQGYQLLQQCCNELR
A2RVS6		SR34A_ARATH Serine/arginine-rich splicing factor SR34A OS=Arabidopsis thaliana OX=3702 GN=SR34A PE=2	156	DSDGTYGVVDYTNYDDMKYAIR	NH2-DSDGTYGVVDYTNYDDM<Mox*>K<But4C13>YAIR-COOH	22	61	39	NH2			156_DSDGTYGVVDYTNYDDMKYAIR
A2RVS6		SR34A_ARATH Serine/arginine-rich splicing factor SR34A OS=Arabidopsis thaliana OX=3702 GN=SR34A PE=2	156	DSDGTYGVVDYTNYDDMKYAIR	NH2-DSDGTYGVVDYTNYDDM<Mox*>K<But>YAIR-COOH	22	49	39	NH2			156_DSDGTYGVVDYTNYDDMKYAIR
Q84L30		RD23D_ARATH Ubiquitin receptor RAD23d OS=Arabidopsis thaliana OX=3702 GN=RAD23D PE=1	304	LINEPVEGEENVMEQLEAAMPQAVTVTPEER	NH2-LINEPVEGEENVM<Mox*>EQLEAAM<Mox*>PQAVTVTPEER-COOH	31	118	43	NH2			304_LINEPVEGEENVMEQLEAAMPQAVTVTPEER
A2RVS6		SR34A_ARATH Serine/arginine-rich splicing factor SR34A OS=Arabidopsis thaliana OX=3702 GN=SR34A PE=2	156	DSDGTYGVVDYTNYDDMKYAIR	NH2-DSDGTYGVVDYTNYDDM<Mox*>K<But4C13>YAIR-COOH	22	86	39	NH2			156_DSDGTYGVVDYTNYDDMKYAIR
Q84L30		RD23D_ARATH Ubiquitin receptor RAD23d OS=Arabidopsis thaliana OX=3702 GN=RAD23D PE=1	315	VMEQLEAAMPQAVTVTPEER	But4C13-VM<Mox*>EQLEAAM<Mox*>PQAVTVTPEER-COOH	20	55	44	But4C13			315_VMEQLEAAMPQAVTVTPEER	But
Q84L30		RD23D_ARATH Ubiquitin receptor RAD23d OS=Arabidopsis thaliana OX=3702 GN=RAD23D PE=1	315	VMEQLEAAMPQAVTVTPEER	But4C13-VM<Mox*>EQLEAAM<Mox*>PQAVTVTPEER-COOH	20	51	44	But4C13			315_VMEQLEAAMPQAVTVTPEER	But
A8MQA1	F4IWP7 (81-104)^AP41127 (134-157)	A8MQA1_ARATH 60S ribosomal protein L13 OS=Arabidopsis thaliana OX=3702 GN=BBC1 PE=1	132	AGDSTPEELANATQVQGDYLPIVR	NH2-AGDSTPEELANATQVQGDYLPIVR-COOH	24	54	45	NH2			132_AGDSTPEELANATQVQGDYLPIVR
A8MQA1	F4IWP7 (81-104)^AP41127 (134-157)	A8MQA1_ARATH 60S ribosomal protein L13 OS=Arabidopsis thaliana OX=3702 GN=BBC1 PE=1	132	AGDSTPEELANATQVQGDYLPIVR	NH2-AGDSTPEELANATQVQGDYLPIVR-COOH	24	56	45	NH2			132_AGDSTPEELANATQVQGDYLPIVR
Q94EG6		Y5224_ARATH Uncharacterized protein At5g02240 OS=Arabidopsis thaliana OX=3702 GN=At5g02240 PE=1	2	ANLPTVLVTGASGR	Ace-ANLPTVLVTGASGR-COOH	14	56	44	Ace		Ace	2_ANLPTVLVTGASGR
A0A2H1ZEH9		A0A2H1ZEH9_ARATH Cysteine proteinase inhibitor OS=Arabidopsis thaliana OX=3702 GN=CYSB PE=1	2	ALVGGVGDVPANQNSGEVESLAR	Ace-ALVGGVGDVPANQNSGEVESLAR-COOH	23	59	45	Ace		Ace	2_ALVGGVGDVPANQNSGEVESLAR
Q9ZUX4		UMP2_ARATH Uncharacterized protein At2g27730, mitochondrial OS=Arabidopsis thaliana OX=3702 GN=At2g27730 PE=1	46	QGPGEQAAGSASEAKVAGATASASAESGPKVSEDKNR	NH2-Q<Pyr>GPGEQAAGSASEAK<But4C13>VAGATASASAESGPK<But4C13>VSEDK<But4C13>NR-COOH	37	83	44	NH2	Q<Pyr>		46_QGPGEQAAGSASEAKVAGATASASAESGPKVSEDKNR
Q9ZUX4		UMP2_ARATH Uncharacterized protein At2g27730, mitochondrial OS=Arabidopsis thaliana OX=3702 GN=At2g27730 PE=1	46	QGPGEQAAGSASEAKVAGATASASAESGPKVSEDKNR	NH2-Q<Pyr>GPGEQAAGSASEAK<But4C13>VAGATASASAESGPK<But4C13>VSEDK<But4C13>NR-COOH	37	75	44	NH2	Q<Pyr>		46_QGPGEQAAGSASEAKVAGATASASAESGPKVSEDKNR
O82629		VATG2_ARATH V-type proton ATPase subunit G2 OS=Arabidopsis thaliana OX=3702 GN=VHA-G2 PE=1	1	MESAGIQQLLAAER	Ace-M<Mox*>ESAGIQQLLAAER-COOH	14	126	45	Ace		Ace	1_MESAGIQQLLAAER
Q9SII9		DSK2A_ARATH Ubiquitin domain-containing protein DSK2a OS=Arabidopsis thaliana OX=3702 GN=DSK2A PE=1	9	QPLTAEGVAVAVNVR	NH2-Q<Pyr>PLTAEGVAVAVNVR-COOH	15	82	45	NH2	Q<Pyr>		9_QPLTAEGVAVAVNVR
Q9ZUX4		UMP2_ARATH Uncharacterized protein At2g27730, mitochondrial OS=Arabidopsis thaliana OX=3702 GN=At2g27730 PE=1	46	QGPGEQAAGSASEAKVAGATASASAESGPKVSEDKNR	NH2-Q<Pyr>GPGEQAAGSASEAK<But4C13>VAGATASASAESGPK<But4C13>VSEDK<But4C13>NR-COOH	37	79	44	NH2	Q<Pyr>		46_QGPGEQAAGSASEAKVAGATASASAESGPKVSEDKNR
Q9LFX8		Q9LFX8_ARATH Glycine-rich protein OS=Arabidopsis thaliana OX=3702 GN=At1g27090 PE=1	2	AATASSEASEGPVMGLINKR	Ace-AATASSEASEGPVM<Mox*>GLINK<But4C13>R-COOH	20	86	45	Ace		Ace	2_AATASSEASEGPVMGLINKR
Q9ZUX4		UMP2_ARATH Uncharacterized protein At2g27730, mitochondrial OS=Arabidopsis thaliana OX=3702 GN=At2g27730 PE=1	46	QGPGEQAAGSASEAKVAGATASASAESGPKVSEDKNR	NH2-Q<Pyr>GPGEQAAGSASEAK<But>VAGATASASAESGPK<But>VSEDK<But>NR-COOH	37	84	43	NH2	Q<Pyr>		46_QGPGEQAAGSASEAKVAGATASASAESGPKVSEDKNR
Q9ZUX4		UMP2_ARATH Uncharacterized protein At2g27730, mitochondrial OS=Arabidopsis thaliana OX=3702 GN=At2g27730 PE=1	46	QGPGEQAAGSASEAKVAGATASASAESGPKVSEDKNR	NH2-QGPGEQAAGSASEAK<But4C13>VAGATASASAESGPK<But4C13>VSEDK<But4C13>NR-COOH	37	51	44	NH2			46_QGPGEQAAGSASEAKVAGATASASAESGPKVSEDKNR
F4J573		F4J573_ARATH Late embryogenesis abundant protein (LEA) family protein OS=Arabidopsis thaliana OX=3702 GN=At3g17520 PE=4	86	KAEEAVGAAKEKAGSAYE	NH2-K<But4C13>AEEAVGAAK<But4C13>EK<But4C13>AGSAYE-COOH	18	64	45	NH2			86_KAEEAVGAAKEKAGSAYE
Q9SIN3		Q9SIN3_ARATH Late embryogenesis abundant domain-containing protein / LEA domain-containing protein OS=Arabidopsis thaliana OX=3702 GN=At2g42560 PE=4	545	GSEKDVFGYGPKGTVEEAR	NH2-GSEK<But4C13>DVFGYGPK<But4C13>GTVEEAR-COOH	19	113	46	NH2			545_GSEKDVFGYGPKGTVEEAR
Q9SYT0		ANXD1_ARATH Annexin D1 OS=Arabidopsis thaliana OX=3702 GN=ANN1 PE=1	2	ATLKVSDSVPAPSDDAEQLR	Ace-ATLK<But4C13>VSDSVPAPSDDAEQLR-COOH	20	82	46	Ace		Ace	2_ATLKVSDSVPAPSDDAEQLR
A0A1P8BCY5	Q8LG60 (2-12)	A0A1P8BCY5_ARATH Hypoxia-responsive family protein OS=Arabidopsis thaliana OX=3702 GN=At5g27760 PE=4	2	AEPKTKVAEIR	Ace-AEPK<But>TK<But>VAEIR-COOH	11	51	43	Ace		Ace	2_AEPKTKVAEIR
Q9SYT0		ANXD1_ARATH Annexin D1 OS=Arabidopsis thaliana OX=3702 GN=ANN1 PE=1	2	ATLKVSDSVPAPSDDAEQLR	Ace-ATLK<But4C13>VSDSVPAPSDDAEQLR-COOH	20	85	46	Ace		Ace	2_ATLKVSDSVPAPSDDAEQLR
A0A1P8BCY5	Q8LG60 (2-12)	A0A1P8BCY5_ARATH Hypoxia-responsive family protein OS=Arabidopsis thaliana OX=3702 GN=At5g27760 PE=4	2	AEPKTKVAEIR	Ace-AEPK<But4C13>TK<But4C13>VAEIR-COOH	11	70	42	Ace		Ace	2_AEPKTKVAEIR
A8MQP1	F4JTV4 (2-12)^AO23255 (2-12)^AQ9LK36 (2-12)	A8MQP1_ARATH S-adenosyl-L-homocysteine hydrolase OS=Arabidopsis thaliana OX=3702 GN=HOG1 PE=4	2	ALLVEKTSSGR	Ace-ALLVEK<But4C13>TSSGR-COOH	11	51	44	Ace		Ace	2_ALLVEKTSSGR
Q94EG6		Y5224_ARATH Uncharacterized protein At5g02240 OS=Arabidopsis thaliana OX=3702 GN=At5g02240 PE=1	2	ANLPTVLVTGASGR	Ace-ANLPTVLVTGASGR-COOH	14	74	45	Ace		Ace	2_ANLPTVLVTGASGR
Q9FH13		RRAA3_ARATH Putative 4-hydroxy-4-methyl-2-oxoglutarate aldolase 3 OS=Arabidopsis thaliana OX=3702 GN=At5g56260 PE=1	2	AAFATAEACDSNAELISNGDLR	Ace-AAFATAEAC<Cmm*>DSNAELISNGDLR-COOH	22	51	42	Ace		Ace	2_AAFATAEACDSNAELISNGDLR
Q8VYC9		Q8VYC9_ARATH Coiled-coil protein OS=Arabidopsis thaliana OX=3702 GN=At1g16210 PE=2	6	GLNSKAEVAKSR	But4C13-GLNSK<But4C13>AEVAK<But4C13>SR-COOH	12	64	43	But4C13			6_GLNSKAEVAKSR	But
P51414		RL261_ARATH 60S ribosomal protein L26-1 OS=Arabidopsis thaliana OX=3702 GN=RPL26A PE=2	126	AAADKEKGTKFTSEDVMQNVD	NH2-AAADK<But>EK<But>GTK<But>FTSEDVM<Mox*>QNVD-COOH	21	46	44	NH2			126_AAADKEKGTKFTSEDVMQNVD
Q9SKP0	A0A1P8B189 (27-41)	ECP63_ARATH Late embryogenesis abundant protein ECP63 OS=Arabidopsis thaliana OX=3702 GN=ECP63 PE=2	27	KSGGADVTMYKVTER	But4C13-K<But4C13>SGGADVTM<Mox*>YK<But4C13>VTER-COOH	15	62	45	But4C13			27_KSGGADVTMYKVTER	But
Q9LFH5		RL122_ARATH 60S ribosomal protein L12-2 OS=Arabidopsis thaliana OX=3702 GN=RPL12B PE=1	151	DLQQEIQEGEIEIPEN	NH2-DLQQEIQEGEIEIPEN-COOH	16	57	44	NH2			151_DLQQEIQEGEIEIPEN
A0A1P8BCY5	Q8LG60 (2-12)	A0A1P8BCY5_ARATH Hypoxia-responsive family protein OS=Arabidopsis thaliana OX=3702 GN=At5g27760 PE=4	2	AEPKTKVAEIR	Ace-AEPK<But>TK<But>VAEIR-COOH	11	46	43	Ace		Ace	2_AEPKTKVAEIR
Q9FH13		RRAA3_ARATH Putative 4-hydroxy-4-methyl-2-oxoglutarate aldolase 3 OS=Arabidopsis thaliana OX=3702 GN=At5g56260 PE=1	2	AAFATAEACDSNAELISNGDLR	Ace-AAFATAEAC<Cmm*>DSNAELISNGDLR-COOH	22	47	41	Ace		Ace	2_AAFATAEACDSNAELISNGDLR
Q9FE58		RL223_ARATH 60S ribosomal protein L22-3 OS=Arabidopsis thaliana OX=3702 GN=RPL22C PE=2	48	GKAGALGDSVSITR	But4C13-GK<But4C13>AGALGDSVSITR-COOH	14	85	44	But4C13			48_GKAGALGDSVSITR	But
Q9S9N1		HSP7E_ARATH Heat shock 70 kDa protein 5 OS=Arabidopsis thaliana OX=3702 GN=HSP70-5 PE=2	65	PQNTVFDAKR	But-PQNTVFDAK<But>R-COOH	10	73	46	But			65_PQNTVFDAKR	But
Q38950		2AAB_ARATH Serine/threonine-protein phosphatase 2A 65 kDa regulatory subunit A beta isoform OS=Arabidopsis thaliana OX=3702 GN=PP2AA2 PE=1	571	FFANQALQSIDNVMMSS	NH2-FFANQALQSIDNVM<Mox*>M<Mox*>SS-COOH	17	45	41	NH2			571_FFANQALQSIDNVMMSS
P15456		CRU2_ARATH 12S seed storage protein CRB OS=Arabidopsis thaliana OX=3702 GN=CRB PE=1	300	ISTLNSYNLPILR	NH2-ISTLNSYNLPILR-COOH	13	95	44	NH2			300_ISTLNSYNLPILR
Q94EG6		Y5224_ARATH Uncharacterized protein At5g02240 OS=Arabidopsis thaliana OX=3702 GN=At5g02240 PE=1	2	ANLPTVLVTGASGR	Ace-ANLPTVLVTGASGR-COOH	14	89	44	Ace		Ace	2_ANLPTVLVTGASGR
Q9M9W1		RL222_ARATH 60S ribosomal protein L22-2 OS=Arabidopsis thaliana OX=3702 GN=RPL22B PE=2	48	GKAGALGDSVTITR	But4C13-GK<But4C13>AGALGDSVTITR-COOH	14	74	44	But4C13			48_GKAGALGDSVTITR	But
A8MRU9	Q8S9M1 (51-64)	A8MRU9_ARATH Plastid-lipid associated protein PAP / fibrillin family protein OS=Arabidopsis thaliana OX=3702 GN=At2g42130 PE=1	51	VQETVQGSPLVYAR	But-VQETVQGSPLVYAR-COOH	14	58	45	But			51_VQETVQGSPLVYAR	But
F4J573		F4J573_ARATH Late embryogenesis abundant protein (LEA) family protein OS=Arabidopsis thaliana OX=3702 GN=At3g17520 PE=4	86	KAEEAVGAAKEKAGSAY	NH2-K<But4C13>AEEAVGAAK<But4C13>EK<But4C13>AGSAY-COOH	17	56	45	NH2			86_KAEEAVGAAKEKAGSAY
F4J573		F4J573_ARATH Late embryogenesis abundant protein (LEA) family protein OS=Arabidopsis thaliana OX=3702 GN=At3g17520 PE=4	86	KAEEAVGAAKEKAGSAY	NH2-K<But4C13>AEEAVGAAK<But4C13>EK<But4C13>AGSAY-COOH	17	74	45	NH2			86_KAEEAVGAAKEKAGSAY
Q84WW2		6PGL3_ARATH 6-phosphogluconolactonase 3, chloroplastic OS=Arabidopsis thaliana OX=3702 GN=PGL3 PE=1	71	ATTNIGKEEKKR	But-ATTNIGK<But>EEK<But>K<But>R-COOH	12	92	44	But			71_ATTNIGKEEKKR	But
Q9SIN3		Q9SIN3_ARATH Late embryogenesis abundant domain-containing protein / LEA domain-containing protein OS=Arabidopsis thaliana OX=3702 GN=At2g42560 PE=4	282	AKDYALQKAVEA	NH2-AK<But4C13>DYALQK<But4C13>AVEA-COOH	12	45	44	NH2			282_AKDYALQKAVEA
A0A2H1ZEH9		A0A2H1ZEH9_ARATH Cysteine proteinase inhibitor OS=Arabidopsis thaliana OX=3702 GN=CYSB PE=1	2	ALVGGVGDVPANQNSGEVESLAR	Ace-ALVGGVGDVPANQNSGEVESLAR-COOH	23	60	45	Ace		Ace	2_ALVGGVGDVPANQNSGEVESLAR
Q42029		PSBP1_ARATH Oxygen-evolving enhancer protein 2-1, chloroplastic OS=Arabidopsis thaliana OX=3702 GN=PSBP1 PE=1	251	KFVESAATSFSVA	NH2-K<But4C13>FVESAATSFSVA-COOH	13	49	46	NH2			251_KFVESAATSFSVA
O22254	P42791 (9-16)^AQ940B0 (9-16)	RL181_ARATH Putative 60S ribosomal protein L18-1 OS=Arabidopsis thaliana OX=3702 GN=RPL18A PE=3	9	GKSKKTKR	But4C13-GK<But4C13>SK<But4C13>K<But4C13>TK<But4C13>R-COOH	8	42	31	But4C13			9_GKSKKTKR	But
P15455		CRU1_ARATH 12S seed storage protein CRA1 OS=Arabidopsis thaliana OX=3702 GN=CRA1 PE=1	103	GLMGKVIPGCAETFQDSSEFQPR	NH2-GLM<Mox*>GK<But4C13>VIPGC<Cmm*>AETFQDSSEFQPR-COOH	23	63	44	NH2			103_GLMGKVIPGCAETFQDSSEFQPR
P15455		CRU1_ARATH 12S seed storage protein CRA1 OS=Arabidopsis thaliana OX=3702 GN=CRA1 PE=1	103	GLMGKVIPGCAETFQDSSEFQPR	NH2-GLM<Mox*>GK<But>VIPGC<Cmm*>AETFQDSSEFQPR-COOH	23	70	43	NH2			103_GLMGKVIPGCAETFQDSSEFQPR
F4J573		F4J573_ARATH Late embryogenesis abundant protein (LEA) family protein OS=Arabidopsis thaliana OX=3702 GN=At3g17520 PE=4	75	KAEDAKEAAKR	But4C13-K<But4C13>AEDAK<But4C13>EAAK<But4C13>R-COOH	11	74	43	But4C13			75_KAEDAKEAAKR	But
P15455		CRU1_ARATH 12S seed storage protein CRA1 OS=Arabidopsis thaliana OX=3702 GN=CRA1 PE=1	103	GLMGKVIPGCAETFQDSSEFQPR	NH2-GLM<Mox*>GK<But4C13>VIPGC<Cmm*>AETFQDSSEFQPR-COOH	23	46	44	NH2			103_GLMGKVIPGCAETFQDSSEFQPR
Q9C713		SYRC_ARATH Arginine--tRNA ligase, cytoplasmic OS=Arabidopsis thaliana OX=3702 GN=At1g66530 PE=1	2	ATIVASKEFTGNPR	Ace-ATIVASK<But>EFTGNPR-COOH	14	89	46	Ace		Ace	2_ATIVASKEFTGNPR
Q94EG6		Y5224_ARATH Uncharacterized protein At5g02240 OS=Arabidopsis thaliana OX=3702 GN=At5g02240 PE=1	2	ANLPTVLVTGASGR	Ace-ANLPTVLVTGASGR-COOH	14	86	45	Ace		Ace	2_ANLPTVLVTGASGR
Q9ZWA9		CRU4_ARATH 12S seed storage protein CRD OS=Arabidopsis thaliana OX=3702 GN=CRD PE=1	113	PETFAEVEGSSGR	But4C13-PETFAEVEGSSGR-COOH	13	78	43	But4C13			113_PETFAEVEGSSGR	But
P15455		CRU1_ARATH 12S seed storage protein CRA1 OS=Arabidopsis thaliana OX=3702 GN=CRA1 PE=1	103	GLMGKVIPGCAETFQDSSEFQPR	NH2-GLM<Mox*>GK<But4C13>VIPGC<Cmm*>AETFQDSSEFQPR-COOH	23	49	43	NH2			103_GLMGKVIPGCAETFQDSSEFQPR
B3H4N7	F4KAM0 (37-55)^AQ9LVC9 (37-55)	B3H4N7_ARATH 60S acidic ribosomal protein family OS=Arabidopsis thaliana OX=3702 GN=MJB24.10 PE=3	37	KLVQTALSADSSGGVQSSF	NH2-K<But4C13>LVQTALSADSSGGVQSSF-COOH	19	48	46	NH2			37_KLVQTALSADSSGGVQSSF
Q9ZWA9		CRU4_ARATH 12S seed storage protein CRD OS=Arabidopsis thaliana OX=3702 GN=CRD PE=1	113	PETFAEVEGSSGR	But-PETFAEVEGSSGR-COOH	13	60	42	But			113_PETFAEVEGSSGR	But
A0A2H1ZEH9		A0A2H1ZEH9_ARATH Cysteine proteinase inhibitor OS=Arabidopsis thaliana OX=3702 GN=CYSB PE=1	2	ALVGGVGDVPANQNSGEVESLAR	Ace-ALVGGVGDVPANQNSGEVESLAR-COOH	23	72	45	Ace		Ace	2_ALVGGVGDVPANQNSGEVESLAR
P15455		CRU1_ARATH 12S seed storage protein CRA1 OS=Arabidopsis thaliana OX=3702 GN=CRA1 PE=1	103	GLMGKVIPGCAETFQDSSEFQPR	NH2-GLM<Mox*>GK<But>VIPGC<Cmm*>AETFQDSSEFQPR-COOH	23	60	43	NH2			103_GLMGKVIPGCAETFQDSSEFQPR
Q9FH13		RRAA3_ARATH Putative 4-hydroxy-4-methyl-2-oxoglutarate aldolase 3 OS=Arabidopsis thaliana OX=3702 GN=At5g56260 PE=1	2	AAFATAEACDSNAELISNGDLR	Ace-AAFATAEAC<Cmm*>DSNAELISNGDLR-COOH	22	115	42	Ace		Ace	2_AAFATAEACDSNAELISNGDLR
P15455		CRU1_ARATH 12S seed storage protein CRA1 OS=Arabidopsis thaliana OX=3702 GN=CRA1 PE=1	103	GLMGKVIPGCAETFQDSSEFQPR	NH2-GLM<Mox*>GK<But4C13>VIPGC<Cmm*>AETFQDSSEFQPR-COOH	23	84	44	NH2			103_GLMGKVIPGCAETFQDSSEFQPR
B3H4N7	F4KAM0 (37-55)^AQ9LVC9 (37-55)	B3H4N7_ARATH 60S acidic ribosomal protein family OS=Arabidopsis thaliana OX=3702 GN=MJB24.10 PE=3	37	KLVQTALSADSSGGVQSSF	NH2-K<But4C13>LVQTALSADSSGGVQSSF-COOH	19	63	46	NH2			37_KLVQTALSADSSGGVQSSF
P15455		CRU1_ARATH 12S seed storage protein CRA1 OS=Arabidopsis thaliana OX=3702 GN=CRA1 PE=1	103	GLMGKVIPGCAETFQDSSEFQPR	NH2-GLM<Mox*>GK<But4C13>VIPGC<Cmm*>AETFQDSSEFQPR-COOH	23	86	43	NH2			103_GLMGKVIPGCAETFQDSSEFQPR
F4I472	Q08112 (2-17)^AQ9FY64 (2-17)	F4I472_ARATH Cytosolic ribosomal protein S15 OS=Arabidopsis thaliana OX=3702 GN=RPS15 PE=3	2	ADVEPEVAAAGVPKKR	Ace-ADVEPEVAAAGVPK<But4C13>K<But4C13>R-COOH	16	80	44	Ace		Ace	2_ADVEPEVAAAGVPKKR
F4I472	Q08112 (2-17)^AQ9FY64 (2-17)	F4I472_ARATH Cytosolic ribosomal protein S15 OS=Arabidopsis thaliana OX=3702 GN=RPS15 PE=3	2	ADVEPEVAAAGVPKKR	Ace-ADVEPEVAAAGVPK<But>K<But>R-COOH	16	69	45	Ace		Ace	2_ADVEPEVAAAGVPKKR
O22788		PXG3_ARATH Probable peroxygenase 3 OS=Arabidopsis thaliana OX=3702 GN=PXG3 PE=1	2	AGEAEALATTAPLAPVTSQR	Ace-AGEAEALATTAPLAPVTSQR-COOH	20	84	46	Ace		Ace	2_AGEAEALATTAPLAPVTSQR
Q9FH13		RRAA3_ARATH Putative 4-hydroxy-4-methyl-2-oxoglutarate aldolase 3 OS=Arabidopsis thaliana OX=3702 GN=At5g56260 PE=1	2	AAFATAEACDSNAELISNGDLR	Ace-AAFATAEAC<Cmm*>DSNAELISNGDLR-COOH	22	159	42	Ace		Ace	2_AAFATAEACDSNAELISNGDLR
O22788		PXG3_ARATH Probable peroxygenase 3 OS=Arabidopsis thaliana OX=3702 GN=PXG3 PE=1	2	AGEAEALATTAPLAPVTSQR	Ace-AGEAEALATTAPLAPVTSQR-COOH	20	53	45	Ace		Ace	2_AGEAEALATTAPLAPVTSQR
Q03251	F4JVB9 (8-24)^AF4JVC0 (8-24)^AF4JVC1 (8-24)	RBG8_ARATH Glycine-rich RNA-binding protein 8 OS=Arabidopsis thaliana OX=3702 GN=RBG8 PE=1	8	CFVGGLAWATNDEDLQR	NH2-C<Cmm*>FVGGLAWATNDEDLQR-COOH	17	104	42	NH2			8_CFVGGLAWATNDEDLQR
Q9FYH8		Q9FYH8_ARATH F17F8.22 OS=Arabidopsis thaliana OX=3702 GN=At1g30910 PE=1	1	MENTLSPLLSPSPASEVAAR	Ace-M<Mox*>ENTLSPLLSPSPASEVAAR-COOH	20	63	45	Ace		Ace	1_MENTLSPLLSPSPASEVAAR
F4I472	Q08112 (2-17)^AQ9FY64 (2-17)	F4I472_ARATH Cytosolic ribosomal protein S15 OS=Arabidopsis thaliana OX=3702 GN=RPS15 PE=3	2	ADVEPEVAAAGVPKKR	Ace-ADVEPEVAAAGVPK<But4C13>K<But4C13>R-COOH	16	57	44	Ace		Ace	2_ADVEPEVAAAGVPKKR
Q94EG6		Y5224_ARATH Uncharacterized protein At5g02240 OS=Arabidopsis thaliana OX=3702 GN=At5g02240 PE=1	2	ANLPTVLVTGASGR	Ace-ANLPTVLVTGASGR-COOH	14	87	44	Ace		Ace	2_ANLPTVLVTGASGR
F4HRW5	P51413 (2-18)	F4HRW5_ARATH Ribosomal protein L22p/L17e family protein OS=Arabidopsis thaliana OX=3702 GN=At1g67430 PE=3	2	VKYSQEPDNQTKSCKAR	But-VK<But>YSQEPDNQTK<But>SC<Cmm*>K<But>AR-COOH	17	76	45	But			2_VKYSQEPDNQTKSCKAR	But
F4HRW5	P51413 (2-18)	F4HRW5_ARATH Ribosomal protein L22p/L17e family protein OS=Arabidopsis thaliana OX=3702 GN=At1g67430 PE=3	2	VKYSQEPDNQTKSCKAR	But-VK<But>YSQEPDNQTK<But>SC<Cmm*>K<But>AR-COOH	17	82	45	But			2_VKYSQEPDNQTKSCKAR	But
Q9ZWA9		CRU4_ARATH 12S seed storage protein CRD OS=Arabidopsis thaliana OX=3702 GN=CRD PE=1	113	PETFAEVEGSSGR	But-PETFAEVEGSSGR-COOH	13	50	43	But			113_PETFAEVEGSSGR	But
Q94BS2		MET1_ARATH Protein MET1, chloroplastic OS=Arabidopsis thaliana OX=3702 GN=MET1 PE=1	171	NGKAEDTGELTEKEIIR	NH2-NGK<But>AEDTGELTEK<But>EIIR-COOH	17	90	46	NH2			171_NGKAEDTGELTEKEIIR
Q9SIN3		Q9SIN3_ARATH Late embryogenesis abundant domain-containing protein / LEA domain-containing protein OS=Arabidopsis thaliana OX=3702 GN=At2g42560 PE=4	235	GQQAKESVGEGAQKAGSATSEKAQR	But4C13-GQQAK<But4C13>ESVGEGAQK<But4C13>AGSATSEK<But4C13>AQR-COOH	25	103	45	But4C13			235_GQQAKESVGEGAQKAGSATSEKAQR	But
Q9SIN3		Q9SIN3_ARATH Late embryogenesis abundant domain-containing protein / LEA domain-containing protein OS=Arabidopsis thaliana OX=3702 GN=At2g42560 PE=4	235	GQQAKESVGEGAQKAGSATSEKAQR	But-GQQAK<But>ESVGEGAQK<But>AGSATSEK<But>AQR-COOH	25	81	45	But			235_GQQAKESVGEGAQKAGSATSEKAQR	But
A0A2H1ZEH9		A0A2H1ZEH9_ARATH Cysteine proteinase inhibitor OS=Arabidopsis thaliana OX=3702 GN=CYSB PE=1	2	ALVGGVGDVPANQNSGEVESLAR	Ace-ALVGGVGDVPANQNSGEVESLAR-COOH	23	52	45	Ace		Ace	2_ALVGGVGDVPANQNSGEVESLAR
P15460		2SS4_ARATH 2S seed storage protein 4 OS=Arabidopsis thaliana OX=3702 GN=AT2S4 PE=2	135	KIYQAAKYLPN	NH2-K<But4C13>IYQAAK<But4C13>YLPN-COOH	11	44	44	NH2			135_KIYQAAKYLPN
F4JLM5		SYIC_ARATH Isoleucine--tRNA ligase, cytoplasmic OS=Arabidopsis thaliana OX=3702 GN=At4g10320 PE=2	1	MEEVCEGKEFSFPR	Ace-M<Mox*>EEVC<Cmm*>EGK<But4C13>EFSFPR-COOH	14	79	41	Ace		Ace	1_MEEVCEGKEFSFPR
Q9FH13		RRAA3_ARATH Putative 4-hydroxy-4-methyl-2-oxoglutarate aldolase 3 OS=Arabidopsis thaliana OX=3702 GN=At5g56260 PE=1	2	AAFATAEACDSNAELISNGDLR	Ace-AAFATAEAC<Cmm*>DSNAELISNGDLR-COOH	22	73	42	Ace		Ace	2_AAFATAEACDSNAELISNGDLR
F4I472	Q08112 (2-17)^AQ9FY64 (2-17)	F4I472_ARATH Cytosolic ribosomal protein S15 OS=Arabidopsis thaliana OX=3702 GN=RPS15 PE=3	2	ADVEPEVAAAGVPKKR	Ace-ADVEPEVAAAGVPK<But4C13>K<But4C13>R-COOH	16	85	44	Ace		Ace	2_ADVEPEVAAAGVPKKR
F4I472	Q08112 (2-17)^AQ9FY64 (2-17)	F4I472_ARATH Cytosolic ribosomal protein S15 OS=Arabidopsis thaliana OX=3702 GN=RPS15 PE=3	2	ADVEPEVAAAGVPKKR	Ace-ADVEPEVAAAGVPK<But>K<But>R-COOH	16	88	45	Ace		Ace	2_ADVEPEVAAAGVPKKR
Q94BS2		MET1_ARATH Protein MET1, chloroplastic OS=Arabidopsis thaliana OX=3702 GN=MET1 PE=1	171	NGKAEDTGELTEKEIIR	NH2-NGK<But4C13>AEDTGELTEK<But4C13>EIIR-COOH	17	108	45	NH2			171_NGKAEDTGELTEKEIIR
Q9FH13		RRAA3_ARATH Putative 4-hydroxy-4-methyl-2-oxoglutarate aldolase 3 OS=Arabidopsis thaliana OX=3702 GN=At5g56260 PE=1	2	AAFATAEACDSNAELISNGDLR	Ace-AAFATAEAC<Cmm*>DSNAELISNGDLR-COOH	22	127	42	Ace		Ace	2_AAFATAEACDSNAELISNGDLR
Q94BS2		MET1_ARATH Protein MET1, chloroplastic OS=Arabidopsis thaliana OX=3702 GN=MET1 PE=1	171	NGKAEDTGELTEKEIIR	NH2-NGK<But4C13>AEDTGELTEK<But4C13>EIIR-COOH	17	108	45	NH2			171_NGKAEDTGELTEKEIIR
A0A2H1ZEH9		A0A2H1ZEH9_ARATH Cysteine proteinase inhibitor OS=Arabidopsis thaliana OX=3702 GN=CYSB PE=1	2	ALVGGVGDVPANQNSGEVESLAR	Ace-ALVGGVGDVPANQNSGEVESLAR-COOH	23	102	45	Ace		Ace	2_ALVGGVGDVPANQNSGEVESLAR
Q94EG6		Y5224_ARATH Uncharacterized protein At5g02240 OS=Arabidopsis thaliana OX=3702 GN=At5g02240 PE=1	2	ANLPTVLVTGASGR	Ace-ANLPTVLVTGASGR-COOH	14	51	44	Ace		Ace	2_ANLPTVLVTGASGR
Q9FH13		RRAA3_ARATH Putative 4-hydroxy-4-methyl-2-oxoglutarate aldolase 3 OS=Arabidopsis thaliana OX=3702 GN=At5g56260 PE=1	2	AAFATAEACDSNAELISNGDLR	Ace-AAFATAEAC<Cmm*>DSNAELISNGDLR-COOH	22	112	41	Ace		Ace	2_AAFATAEACDSNAELISNGDLR
Q9FH13		RRAA3_ARATH Putative 4-hydroxy-4-methyl-2-oxoglutarate aldolase 3 OS=Arabidopsis thaliana OX=3702 GN=At5g56260 PE=1	2	AAFATAEACDSNAELISNGDLR	Ace-AAFATAEAC<Cmm*>DSNAELISNGDLR-COOH	22	66	42	Ace		Ace	2_AAFATAEACDSNAELISNGDLR
Q9FH13		RRAA3_ARATH Putative 4-hydroxy-4-methyl-2-oxoglutarate aldolase 3 OS=Arabidopsis thaliana OX=3702 GN=At5g56260 PE=1	2	AAFATAEACDSNAELISNGDLR	Ace-AAFATAEAC<Cmm*>DSNAELISNGDLR-COOH	22	84	41	Ace		Ace	2_AAFATAEACDSNAELISNGDLR
F4I472	Q08112 (2-17)^AQ9FY64 (2-17)	F4I472_ARATH Cytosolic ribosomal protein S15 OS=Arabidopsis thaliana OX=3702 GN=RPS15 PE=3	2	ADVEPEVAAAGVPKKR	Ace-ADVEPEVAAAGVPK<But>K<But>R-COOH	16	79	45	Ace		Ace	2_ADVEPEVAAAGVPKKR
A0A1P8AXF4	F4IP31 (2-21)^AQ9SJL6 (2-21)	A0A1P8AXF4_ARATH Membrin OS=Arabidopsis thaliana OX=3702 GN=MEMB11 PE=1	2	ASGIVEGGGSLSDVYSSAKR	Ace-ASGIVEGGGSLSDVYSSAK<But4C13>R-COOH	20	112	45	Ace		Ace	2_ASGIVEGGGSLSDVYSSAKR
Q9FM54		FOLB2_ARATH Dihydroneopterin aldolase 2 OS=Arabidopsis thaliana OX=3702 GN=FOLB2 PE=1	1	MEKDMAMMGDKLILR	Ace-M<Mox*>EK<But4C13>DM<Mox*>AM<Mox*>M<Mox*>GDK<But4C13>LILR-COOH	15	53	45	Ace		Ace	1_MEKDMAMMGDKLILR
A0A1P8AXF4	F4IP31 (2-21)^AQ9SJL6 (2-21)	A0A1P8AXF4_ARATH Membrin OS=Arabidopsis thaliana OX=3702 GN=MEMB11 PE=1	2	ASGIVEGGGSLSDVYSSAKR	Ace-ASGIVEGGGSLSDVYSSAK<But4C13>R-COOH	20	126	45	Ace		Ace	2_ASGIVEGGGSLSDVYSSAKR
A0A1P8AXF4	F4IP31 (2-21)^AQ9SJL6 (2-21)	A0A1P8AXF4_ARATH Membrin OS=Arabidopsis thaliana OX=3702 GN=MEMB11 PE=1	2	ASGIVEGGGSLSDVYSSAKR	Ace-ASGIVEGGGSLSDVYSSAK<But4C13>R-COOH	20	76	45	Ace		Ace	2_ASGIVEGGGSLSDVYSSAKR
A0A1P8AXF4	F4IP31 (2-21)^AQ9SJL6 (2-21)	A0A1P8AXF4_ARATH Membrin OS=Arabidopsis thaliana OX=3702 GN=MEMB11 PE=1	2	ASGIVEGGGSLSDVYSSAKR	Ace-ASGIVEGGGSLSDVYSSAK<But4C13>R-COOH	20	95	45	Ace		Ace	2_ASGIVEGGGSLSDVYSSAKR
O23715		PSA3_ARATH Proteasome subunit alpha type-3 OS=Arabidopsis thaliana OX=3702 GN=PAG1 PE=1	2	SSIGTGYDLSVTTFSPDGR	Ace-SSIGTGYDLSVTTFSPDGR-COOH	19	119	44	Ace		Ace	2_SSIGTGYDLSVTTFSPDGR
Q9FFE0		RRAA2_ARATH Putative 4-hydroxy-4-methyl-2-oxoglutarate aldolase 2 OS=Arabidopsis thaliana OX=3702 GN=At5g16450 PE=1	2	AFVTTAEVCDANQELIR	Ace-AFVTTAEVC<Cmm*>DANQELIR-COOH	17	87	45	Ace		Ace	2_AFVTTAEVCDANQELIR
Q9SUB2		Q9SUB2_ARATH Late embryogenesis abundant protein (LEA) family protein OS=Arabidopsis thaliana OX=3702 GN=At4g21020 PE=2	61	DSAYGSKKWR	But4C13-DSAYGSK<But4C13>K<But4C13>WR-COOH	10	61	45	But4C13			61_DSAYGSKKWR	But
A8MQA1	F4IWP7 (81-104)^AP41127 (134-157)	A8MQA1_ARATH 60S ribosomal protein L13 OS=Arabidopsis thaliana OX=3702 GN=BBC1 PE=1	132	AGDSTPEELANATQVQGDYLPIVR	NH2-AGDSTPEELANATQVQGDYLPIVR-COOH	24	151	45	NH2			132_AGDSTPEELANATQVQGDYLPIVR
Q9FM54		FOLB2_ARATH Dihydroneopterin aldolase 2 OS=Arabidopsis thaliana OX=3702 GN=FOLB2 PE=1	1	MEKDMAMMGDKLILR	Ace-M<Mox*>EK<But>DM<Mox*>AM<Mox*>M<Mox*>GDK<But>LILR-COOH	15	65	44	Ace		Ace	1_MEKDMAMMGDKLILR
F4I472	Q08112 (2-17)^AQ9FY64 (2-17)	F4I472_ARATH Cytosolic ribosomal protein S15 OS=Arabidopsis thaliana OX=3702 GN=RPS15 PE=3	2	ADVEPEVAAAGVPKKR	Ace-ADVEPEVAAAGVPK<But4C13>K<But4C13>R-COOH	16	68	44	Ace		Ace	2_ADVEPEVAAAGVPKKR
P0DI74	P0DI75 (1-12)	S61G1_ARATH Protein transport protein Sec61 subunit gamma-1 OS=Arabidopsis thaliana OX=3702 GN=SEC61G1 PE=1	1	MDAIDSVVDPLR	Ace-M<Mox*>DAIDSVVDPLR-COOH	12	100	45	Ace		Ace	1_MDAIDSVVDPLR
O65201		ACOX2_ARATH Acyl-coenzyme A oxidase 2, peroxisomal OS=Arabidopsis thaliana OX=3702 GN=ACX2 PE=1	674	APIAMQSDAYSQYTQVVGF	NH2-APIAM<Mox*>QSDAYSQYTQVVGF-COOH	19	73	43	NH2			674_APIAMQSDAYSQYTQVVGF
A0A2H1ZEH9		A0A2H1ZEH9_ARATH Cysteine proteinase inhibitor OS=Arabidopsis thaliana OX=3702 GN=CYSB PE=1	2	ALVGGVGDVPANQNSGEVESLAR	Ace-ALVGGVGDVPANQNSGEVESLAR-COOH	23	137	45	Ace		Ace	2_ALVGGVGDVPANQNSGEVESLAR
F4I472	Q08112 (2-17)^AQ9FY64 (2-17)	F4I472_ARATH Cytosolic ribosomal protein S15 OS=Arabidopsis thaliana OX=3702 GN=RPS15 PE=3	2	ADVEPEVAAAGVPKKR	Ace-ADVEPEVAAAGVPK<But4C13>K<But4C13>R-COOH	16	51	44	Ace		Ace	2_ADVEPEVAAAGVPKKR
Q9FFE0		RRAA2_ARATH Putative 4-hydroxy-4-methyl-2-oxoglutarate aldolase 2 OS=Arabidopsis thaliana OX=3702 GN=At5g16450 PE=1	2	AFVTTAEVCDANQELIR	Ace-AFVTTAEVC<Cmm*>DANQELIR-COOH	17	82	45	Ace		Ace	2_AFVTTAEVCDANQELIR
P59230	Q8VZB9 (202-214)	R10A2_ARATH 60S ribosomal protein L10a-2 OS=Arabidopsis thaliana OX=3702 GN=RPL10AB PE=1	202	CLYLKSTMGPPQR	NH2-C<Cmm*>LYLK<But4C13>STM<Mox*>GPPQR-COOH	13	51	45	NH2			202_CLYLKSTMGPPQR
P39207		NDK1_ARATH Nucleoside diphosphate kinase 1 OS=Arabidopsis thaliana OX=3702 GN=NDK1 PE=1	1	MEQTFIMIKPDGVQR	Ace-M<Mox*>EQTFIM<Mox*>IK<But4C13>PDGVQR-COOH	15	52	45	Ace		Ace	1_MEQTFIMIKPDGVQR
P39207		NDK1_ARATH Nucleoside diphosphate kinase 1 OS=Arabidopsis thaliana OX=3702 GN=NDK1 PE=1	1	MEQTFIMIKPDGVQR	Ace-M<Mox*>EQTFIM<Mox*>IK<But4C13>PDGVQR-COOH	15	46	45	Ace		Ace	1_MEQTFIMIKPDGVQR
A0A2H1ZEH9		A0A2H1ZEH9_ARATH Cysteine proteinase inhibitor OS=Arabidopsis thaliana OX=3702 GN=CYSB PE=1	2	ALVGGVGDVPANQNSGEVESLAR	Ace-ALVGGVGDVPANQNSGEVESLAR-COOH	23	110	45	Ace		Ace	2_ALVGGVGDVPANQNSGEVESLAR
P15456		CRU2_ARATH 12S seed storage protein CRB OS=Arabidopsis thaliana OX=3702 GN=CRB PE=1	36	NALEPSQIIKSEGGR	NH2-NALEPSQIIK<But>SEGGR-COOH	15	64	45	NH2			36_NALEPSQIIKSEGGR
Q3EDG6		Q3EDG6_ARATH Expressed protein OS=Arabidopsis thaliana OX=3702 GN=At1g07985 PE=2	2	AVVEEPILSR	But4C13-AVVEEPILSR-COOH	10	78	44	But4C13			2_AVVEEPILSR	But
P15460		2SS4_ARATH 2S seed storage protein 4 OS=Arabidopsis thaliana OX=3702 GN=AT2S4 PE=2	135	KIYQAAKYLPN	NH2-K<But4C13>IYQAAK<But4C13>YLPN-COOH	11	45	44	NH2			135_KIYQAAKYLPN
A8MQP1	F4JTV4 (2-12)^AO23255 (2-12)^AQ9LK36 (2-12)	A8MQP1_ARATH S-adenosyl-L-homocysteine hydrolase OS=Arabidopsis thaliana OX=3702 GN=HOG1 PE=4	2	ALLVEKTSSGR	Ace-ALLVEK<But4C13>TSSGR-COOH	11	64	44	Ace		Ace	2_ALLVEKTSSGR
P39207		NDK1_ARATH Nucleoside diphosphate kinase 1 OS=Arabidopsis thaliana OX=3702 GN=NDK1 PE=1	1	MEQTFIMIKPDGVQR	Ace-M<Mox*>EQTFIM<Mox*>IK<But>PDGVQR-COOH	15	46	45	Ace		Ace	1_MEQTFIMIKPDGVQR
B9DH97	P47192 (2-13)^AQ9ZTW3 (2-13)	B9DH97_ARATH AT2G33120 protein OS=Arabidopsis thaliana OX=3702 GN=SAR1 PE=2	2	AQQSLIYSFVAR	Ace-AQQSLIYSFVAR-COOH	12	51	45	Ace		Ace	2_AQQSLIYSFVAR
B9DH97	P47192 (2-13)^AQ9ZTW3 (2-13)	B9DH97_ARATH AT2G33120 protein OS=Arabidopsis thaliana OX=3702 GN=SAR1 PE=2	2	AQQSLIYSFVAR	Ace-AQQSLIYSFVAR-COOH	12	62	45	Ace		Ace	2_AQQSLIYSFVAR
Q9LYN0		PR1B1_ARATH PRA1 family protein B1 OS=Arabidopsis thaliana OX=3702 GN=PRA1B1 PE=1	2	ATPPTLPVTNQQAVQSQPPINTPAFR	Ace-ATPPTLPVTNQQAVQSQPPINTPAFR-COOH	26	71	45	Ace		Ace	2_ATPPTLPVTNQQAVQSQPPINTPAFR
Q94EG6		Y5224_ARATH Uncharacterized protein At5g02240 OS=Arabidopsis thaliana OX=3702 GN=At5g02240 PE=1	2	ANLPTVLVTGASGR	Ace-ANLPTVLVTGASGR-COOH	14	66	45	Ace		Ace	2_ANLPTVLVTGASGR
Q9LYN0		PR1B1_ARATH PRA1 family protein B1 OS=Arabidopsis thaliana OX=3702 GN=PRA1B1 PE=1	2	ATPPTLPVTNQQAVQSQPPINTPAFR	Ace-ATPPTLPVTNQQAVQSQPPINTPAFR-COOH	26	109	45	Ace		Ace	2_ATPPTLPVTNQQAVQSQPPINTPAFR
A8MQP1	F4JTV4 (2-12)^AO23255 (2-12)^AQ9LK36 (2-12)	A8MQP1_ARATH S-adenosyl-L-homocysteine hydrolase OS=Arabidopsis thaliana OX=3702 GN=HOG1 PE=4	2	ALLVEKTSSGR	Ace-ALLVEK<But>TSSGR-COOH	11	61	45	Ace		Ace	2_ALLVEKTSSGR
P0DI74	P0DI75 (1-12)	S61G1_ARATH Protein transport protein Sec61 subunit gamma-1 OS=Arabidopsis thaliana OX=3702 GN=SEC61G1 PE=1	1	MDAIDSVVDPLR	Ace-M<Mox*>DAIDSVVDPLR-COOH	12	101	45	Ace		Ace	1_MDAIDSVVDPLR
A8MQP1	F4JTV4 (2-12)^AO23255 (2-12)^AQ9LK36 (2-12)	A8MQP1_ARATH S-adenosyl-L-homocysteine hydrolase OS=Arabidopsis thaliana OX=3702 GN=HOG1 PE=4	2	ALLVEKTSSGR	Ace-ALLVEK<But4C13>TSSGR-COOH	11	55	44	Ace		Ace	2_ALLVEKTSSGR
A0A2H1ZEH9		A0A2H1ZEH9_ARATH Cysteine proteinase inhibitor OS=Arabidopsis thaliana OX=3702 GN=CYSB PE=1	2	ALVGGVGDVPANQNSGEVESLAR	Ace-ALVGGVGDVPANQNSGEVESLAR-COOH	23	95	46	Ace		Ace	2_ALVGGVGDVPANQNSGEVESLAR
A0A2H1ZEH9		A0A2H1ZEH9_ARATH Cysteine proteinase inhibitor OS=Arabidopsis thaliana OX=3702 GN=CYSB PE=1	2	ALVGGVGDVPANQNSGEVESLAR	Ace-ALVGGVGDVPANQNSGEVESLAR-COOH	23	84	45	Ace		Ace	2_ALVGGVGDVPANQNSGEVESLAR
P15455		CRU1_ARATH 12S seed storage protein CRA1 OS=Arabidopsis thaliana OX=3702 GN=CRA1 PE=1	190	PFYLAGNNPQGQVW	NH2-PFYLAGNNPQGQVW-COOH	14	60	45	NH2			190_PFYLAGNNPQGQVW
Q9SUB2		Q9SUB2_ARATH Late embryogenesis abundant protein (LEA) family protein OS=Arabidopsis thaliana OX=3702 GN=At4g21020 PE=2	132	TKDKVNEGAYKAADKA	NH2-TK<But>DK<But>VNEGAYK<But>AADK<But>A-COOH	16	66	45	NH2			132_TKDKVNEGAYKAADKA
O23715		PSA3_ARATH Proteasome subunit alpha type-3 OS=Arabidopsis thaliana OX=3702 GN=PAG1 PE=1	2	SSIGTGYDLSVTTFSPDGR	Ace-SSIGTGYDLSVTTFSPDGR-COOH	19	140	44	Ace		Ace	2_SSIGTGYDLSVTTFSPDGR
F4J573		F4J573_ARATH Late embryogenesis abundant protein (LEA) family protein OS=Arabidopsis thaliana OX=3702 GN=At3g17520 PE=4	86	KAEEAVGAAKEKAGSAYETA	NH2-K<But4C13>AEEAVGAAK<But4C13>EK<But4C13>AGSAYETA-COOH	20	53	45	NH2			86_KAEEAVGAAKEKAGSAYETA
Q94EG6		Y5224_ARATH Uncharacterized protein At5g02240 OS=Arabidopsis thaliana OX=3702 GN=At5g02240 PE=1	2	ANLPTVLVTGASGR	Ace-ANLPTVLVTGASGR-COOH	14	48	45	Ace		Ace	2_ANLPTVLVTGASGR
F4JLA9	Q96318 (385-413)	F4JLA9_ARATH Cruciferin 3 OS=Arabidopsis thaliana OX=3702 GN=CRU3 PE=1	314	GVLQGNAMVLPKYNMNANEILYCTGGQGR	NH2-GVLQGNAM<Mox*>VLPK<But4C13>YNM<Mox*>NANEILYC<Cmm*>TGGQGR-COOH	29	45	43	NH2			314_GVLQGNAMVLPKYNMNANEILYCTGGQGR
A0A2H1ZEH9		A0A2H1ZEH9_ARATH Cysteine proteinase inhibitor OS=Arabidopsis thaliana OX=3702 GN=CYSB PE=1	2	ALVGGVGDVPANQNSGEVESLAR	Ace-ALVGGVGDVPANQNSGEVESLAR-COOH	23	95	45	Ace		Ace	2_ALVGGVGDVPANQNSGEVESLAR
P15455		CRU1_ARATH 12S seed storage protein CRA1 OS=Arabidopsis thaliana OX=3702 GN=CRA1 PE=1	190	PFYLAGNNPQGQVW	NH2-PFYLAGNNPQGQVW-COOH	14	85	45	NH2			190_PFYLAGNNPQGQVW
P39207		NDK1_ARATH Nucleoside diphosphate kinase 1 OS=Arabidopsis thaliana OX=3702 GN=NDK1 PE=1	1	MEQTFIMIKPDGVQR	Ace-M<Mox*>EQTFIM<Mox*>IK<But4C13>PDGVQR-COOH	15	77	45	Ace		Ace	1_MEQTFIMIKPDGVQR
Q9FFE0		RRAA2_ARATH Putative 4-hydroxy-4-methyl-2-oxoglutarate aldolase 2 OS=Arabidopsis thaliana OX=3702 GN=At5g16450 PE=1	2	AFVTTAEVCDANQELIR	Ace-AFVTTAEVC<Cmm*>DANQELIR-COOH	17	66	45	Ace		Ace	2_AFVTTAEVCDANQELIR
Q9LUJ7		PAP85_ARATH Vicilin-like seed storage protein At3g22640 OS=Arabidopsis thaliana OX=3702 GN=PAP85 PE=2	229	SKEIGQGIIR	But4C13-SK<But4C13>EIGQGIIR-COOH	10	82	42	But4C13			229_SKEIGQGIIR	But
P15459		2SS3_ARATH 2S seed storage protein 3 OS=Arabidopsis thaliana OX=3702 GN=AT2S3 PE=1	84	GPQQGYQLLQQCCNELR	But4C13-GPQQGYQLLQQC<Cmm*>C<Cmm*>NELR-COOH	17	61	43	But4C13			84_GPQQGYQLLQQCCNELR	But
Q9FFE0		RRAA2_ARATH Putative 4-hydroxy-4-methyl-2-oxoglutarate aldolase 2 OS=Arabidopsis thaliana OX=3702 GN=At5g16450 PE=1	2	AFVTTAEVCDANQELIR	Ace-AFVTTAEVC<Cmm*>DANQELIR-COOH	17	63	44	Ace		Ace	2_AFVTTAEVCDANQELIR
Q94EG6		Y5224_ARATH Uncharacterized protein At5g02240 OS=Arabidopsis thaliana OX=3702 GN=At5g02240 PE=1	2	ANLPTVLVTGASGR	Ace-ANLPTVLVTGASGR-COOH	14	66	44	Ace		Ace	2_ANLPTVLVTGASGR
P15459		2SS3_ARATH 2S seed storage protein 3 OS=Arabidopsis thaliana OX=3702 GN=AT2S3 PE=1	84	GPQQGYQLLQQCCNELR	But4C13-GPQQGYQLLQQC<Cmm*>C<Cmm*>NELR-COOH	17	51	43	But4C13			84_GPQQGYQLLQQCCNELR	But
Q9FIQ0		AGD9_ARATH Probable ADP-ribosylation factor GTPase-activating protein AGD9 OS=Arabidopsis thaliana OX=3702 GN=AGD9 PE=1	2	ATENLTDKNVVFR	Ace-ATENLTDK<But4C13>NVVFR-COOH	13	111	45	Ace		Ace	2_ATENLTDKNVVFR
P15459		2SS3_ARATH 2S seed storage protein 3 OS=Arabidopsis thaliana OX=3702 GN=AT2S3 PE=1	84	GPQQGYQLLQQCCNELR	But4C13-GPQQGYQLLQQC<Cmm*>C<Cmm*>NELR-COOH	17	66	43	But4C13			84_GPQQGYQLLQQCCNELR	But
Q9FFE0		RRAA2_ARATH Putative 4-hydroxy-4-methyl-2-oxoglutarate aldolase 2 OS=Arabidopsis thaliana OX=3702 GN=At5g16450 PE=1	2	AFVTTAEVCDANQELIR	Ace-AFVTTAEVC<Cmm*>DANQELIR-COOH	17	65	45	Ace		Ace	2_AFVTTAEVCDANQELIR
Q9FFE0		RRAA2_ARATH Putative 4-hydroxy-4-methyl-2-oxoglutarate aldolase 2 OS=Arabidopsis thaliana OX=3702 GN=At5g16450 PE=1	2	AFVTTAEVCDANQELIR	Ace-AFVTTAEVC<Cmm*>DANQELIR-COOH	17	72	44	Ace		Ace	2_AFVTTAEVCDANQELIR
Q94EG6		Y5224_ARATH Uncharacterized protein At5g02240 OS=Arabidopsis thaliana OX=3702 GN=At5g02240 PE=1	2	ANLPTVLVTGASGR	Ace-ANLPTVLVTGASGR-COOH	14	48	45	Ace		Ace	2_ANLPTVLVTGASGR
P15455		CRU1_ARATH 12S seed storage protein CRA1 OS=Arabidopsis thaliana OX=3702 GN=CRA1 PE=1	190	PFYLAGNNPQGQVW	NH2-PFYLAGNNPQGQVW-COOH	14	85	45	NH2			190_PFYLAGNNPQGQVW
P39207		NDK1_ARATH Nucleoside diphosphate kinase 1 OS=Arabidopsis thaliana OX=3702 GN=NDK1 PE=1	1	MEQTFIMIKPDGVQR	Ace-M<Mox*>EQTFIM<Mox*>IK<But4C13>PDGVQR-COOH	15	86	45	Ace		Ace	1_MEQTFIMIKPDGVQR
O24598		CHI58_ARATH Endochitinase At2g43580 OS=Arabidopsis thaliana OX=3702 GN=At2g43580 PE=2	190	QPELVSSNPVVAFR	NH2-Q<Pyr>PELVSSNPVVAFR-COOH	14	82	45	NH2	Q<Pyr>		190_QPELVSSNPVVAFR
O24598		CHI58_ARATH Endochitinase At2g43580 OS=Arabidopsis thaliana OX=3702 GN=At2g43580 PE=2	190	QPELVSSNPVVAFR	NH2-QPELVSSNPVVAFR-COOH	14	61	45	NH2			190_QPELVSSNPVVAFR
P39207		NDK1_ARATH Nucleoside diphosphate kinase 1 OS=Arabidopsis thaliana OX=3702 GN=NDK1 PE=1	1	MEQTFIMIKPDGVQR	Ace-M<Mox*>EQTFIM<Mox*>IK<But>PDGVQR-COOH	15	75	45	Ace		Ace	1_MEQTFIMIKPDGVQR
F4JLA9	Q96318 (385-413)	F4JLA9_ARATH Cruciferin 3 OS=Arabidopsis thaliana OX=3702 GN=CRU3 PE=1	314	GVLQGNAMVLPKYNMNANEILYCTGGQGR	NH2-GVLQGNAM<Mox*>VLPK<But>YNM<Mox*>NANEILYC<Cmm*>TGGQGR-COOH	29	127	44	NH2			314_GVLQGNAMVLPKYNMNANEILYCTGGQGR
Q9SIN3		Q9SIN3_ARATH Late embryogenesis abundant domain-containing protein / LEA domain-containing protein OS=Arabidopsis thaliana OX=3702 GN=At2g42560 PE=4	229	DTVAEKGQQAKESVGEGAQKAGSATSEKAQR	NH2-DTVAEK<But4C13>GQQAK<But4C13>ESVGEGAQK<But4C13>AGSATSEK<But4C13>AQR-COOH	31	78	45	NH2			229_DTVAEKGQQAKESVGEGAQKAGSATSEKAQR
F4JLA9	Q96318 (385-413)	F4JLA9_ARATH Cruciferin 3 OS=Arabidopsis thaliana OX=3702 GN=CRU3 PE=1	314	GVLQGNAMVLPKYNMNANEILYCTGGQGR	NH2-GVLQGNAM<Mox*>VLPK<But4C13>YNM<Mox*>NANEILYC<Cmm*>TGGQGR-COOH	29	116	44	NH2			314_GVLQGNAMVLPKYNMNANEILYCTGGQGR
Q9SUB2		Q9SUB2_ARATH Late embryogenesis abundant protein (LEA) family protein OS=Arabidopsis thaliana OX=3702 GN=At4g21020 PE=2	60	ADSAYGSKKWR	But-ADSAYGSK<But>K<But>WR-COOH	11	82	45	But			60_ADSAYGSKKWR	But
P39207		NDK1_ARATH Nucleoside diphosphate kinase 1 OS=Arabidopsis thaliana OX=3702 GN=NDK1 PE=1	1	MEQTFIMIKPDGVQR	Ace-M<Mox*>EQTFIM<Mox*>IK<But4C13>PDGVQR-COOH	15	74	45	Ace		Ace	1_MEQTFIMIKPDGVQR
Q9LUJ7		PAP85_ARATH Vicilin-like seed storage protein At3g22640 OS=Arabidopsis thaliana OX=3702 GN=PAP85 PE=2	229	SKEIGQGIIR	But4C13-SK<But4C13>EIGQGIIR-COOH	10	66	42	But4C13			229_SKEIGQGIIR	But
Q9SUB2		Q9SUB2_ARATH Late embryogenesis abundant protein (LEA) family protein OS=Arabidopsis thaliana OX=3702 GN=At4g21020 PE=2	256	DQKEDDFITFN	NH2-DQK<But4C13>EDDFITFN-COOH	11	51	43	NH2			256_DQKEDDFITFN
Q9SIN3		Q9SIN3_ARATH Late embryogenesis abundant domain-containing protein / LEA domain-containing protein OS=Arabidopsis thaliana OX=3702 GN=At2g42560 PE=4	229	DTVAEKGQQAKESVGEGAQKAGSATSEKAQR	NH2-DTVAEK<But4C13>GQQAK<But4C13>ESVGEGAQK<But4C13>AGSATSEK<But4C13>AQR-COOH	31	77	45	NH2			229_DTVAEKGQQAKESVGEGAQKAGSATSEKAQR
P15455		CRU1_ARATH 12S seed storage protein CRA1 OS=Arabidopsis thaliana OX=3702 GN=CRA1 PE=1	190	PFYLAGNNPQGQVW	NH2-PFYLAGNNPQGQVW-COOH	14	49	45	NH2			190_PFYLAGNNPQGQVW
Q9FFE0		RRAA2_ARATH Putative 4-hydroxy-4-methyl-2-oxoglutarate aldolase 2 OS=Arabidopsis thaliana OX=3702 GN=At5g16450 PE=1	2	AFVTTAEVCDANQELIR	Ace-AFVTTAEVC<Cmm*>DANQELIR-COOH	17	115	45	Ace		Ace	2_AFVTTAEVCDANQELIR
F4K1D3	Q9FKI2 (2-12)^AQ9SJB9 (2-12)	F4K1D3_ARATH Nucleic acid-binding, OB-fold-like protein OS=Arabidopsis thaliana OX=3702 GN=MXH1.2 PE=3	2	PKNKGKGGKNR	But-PK<But>NK<But>GK<But>GGK<But>NR-COOH	11	53	42	But			2_PKNKGKGGKNR	But
F4K1D3	Q9FKI2 (2-12)^AQ9SJB9 (2-12)	F4K1D3_ARATH Nucleic acid-binding, OB-fold-like protein OS=Arabidopsis thaliana OX=3702 GN=MXH1.2 PE=3	2	PKNKGKGGKNR	But4C13-PK<But4C13>NK<But4C13>GK<But4C13>GGK<But4C13>NR-COOH	11	56	37	But4C13			2_PKNKGKGGKNR	But
Q9LF88		Y3304_ARATH Late embryogenesis abundant protein At3g53040 OS=Arabidopsis thaliana OX=3702 GN=At3g53040 PE=2	122	EAKDKTADKTKETADYAAEKAR	NH2-EAK<But4C13>DK<But4C13>TADK<But4C13>TK<But4C13>ETADYAAEK<But4C13>AR-COOH	22	56	44	NH2			122_EAKDKTADKTKETADYAAEKAR
Q9SUG6		PUX3_ARATH Plant UBX domain-containing protein 3 OS=Arabidopsis thaliana OX=3702 GN=PUX3 PE=1	2	SSKDKKLSKPTSGR	Ace-SSK<But4C13>DK<But4C13>K<But4C13>LSK<But4C13>PTSGR-COOH	14	58	41	Ace		Ace	2_SSKDKKLSKPTSGR
Q9LF88		Y3304_ARATH Late embryogenesis abundant protein At3g53040 OS=Arabidopsis thaliana OX=3702 GN=At3g53040 PE=2	319	QKAVETKDTAKEKMDEAGEEAR	NH2-Q<Pyr>K<But4C13>AVETK<But4C13>DTAK<But4C13>EK<But4C13>M<Mox*>DEAGEEAR-COOH	22	90	45	NH2	Q<Pyr>		319_QKAVETKDTAKEKMDEAGEEAR
Q9C9G6		AE7_ARATH Protein AE7 OS=Arabidopsis thaliana OX=3702 GN=AE7 PE=1	136	VAAALENPNLVEMVDECLPSEE	NH2-VAAALENPNLVEM<Mox*>VDEC<Cmm*>LPSEE-COOH	22	43	42	NH2			136_VAAALENPNLVEMVDECLPSEE
Q9LF88		Y3304_ARATH Late embryogenesis abundant protein At3g53040 OS=Arabidopsis thaliana OX=3702 GN=At3g53040 PE=2	319	QKAVETKDTAKEKMDEAGEEAR	NH2-QK<But4C13>AVETK<But4C13>DTAK<But4C13>EK<But4C13>M<Mox*>DEAGEEAR-COOH	22	68	45	NH2			319_QKAVETKDTAKEKMDEAGEEAR
Q9LF88		Y3304_ARATH Late embryogenesis abundant protein At3g53040 OS=Arabidopsis thaliana OX=3702 GN=At3g53040 PE=2	319	QKAVETKDTAKEKMDEAGEEAR	NH2-Q<Pyr>K<But>AVETK<But>DTAK<But>EK<But>M<Mox*>DEAGEEAR-COOH	22	74	45	NH2	Q<Pyr>		319_QKAVETKDTAKEKMDEAGEEAR
F4KG52	Q04980 (261-274)	F4KG52_ARATH CAP160 protein OS=Arabidopsis thaliana OX=3702 GN=LTI65 PE=4	260	GEAGVPEIAESLGR	But4C13-GEAGVPEIAESLGR-COOH	14	65	46	But4C13			260_GEAGVPEIAESLGR	But
Q9LF88		Y3304_ARATH Late embryogenesis abundant protein At3g53040 OS=Arabidopsis thaliana OX=3702 GN=At3g53040 PE=2	319	QKAVETKDTAKEKMDEAGEEAR	NH2-Q<Pyr>K<But>AVETK<But>DTAK<But>EK<But>M<Mox*>DEAGEEAR-COOH	22	77	45	NH2	Q<Pyr>		319_QKAVETKDTAKEKMDEAGEEAR
Q9LF88		Y3304_ARATH Late embryogenesis abundant protein At3g53040 OS=Arabidopsis thaliana OX=3702 GN=At3g53040 PE=2	319	QKAVETKDTAKEKMDEAGEEAR	NH2-QK<But4C13>AVETK<But4C13>DTAK<But4C13>EK<But4C13>M<Mox*>DEAGEEAR-COOH	22	72	45	NH2			319_QKAVETKDTAKEKMDEAGEEAR
P15456		CRU2_ARATH 12S seed storage protein CRB OS=Arabidopsis thaliana OX=3702 GN=CRB PE=1	201	KQQKQNNIFNGFAPE	NH2-K<But>QQK<But>QNNIFNGFAPE-COOH	15	48	46	NH2			201_KQQKQNNIFNGFAPE
Q9LF88		Y3304_ARATH Late embryogenesis abundant protein At3g53040 OS=Arabidopsis thaliana OX=3702 GN=At3g53040 PE=2	319	QKAVETKDTAKEKMDEAGEEAR	NH2-Q<Pyr>K<But>AVETK<But>DTAK<But>EK<But>M<Mox*>DEAGEEAR-COOH	22	100	45	NH2	Q<Pyr>		319_QKAVETKDTAKEKMDEAGEEAR
P15455		CRU1_ARATH 12S seed storage protein CRA1 OS=Arabidopsis thaliana OX=3702 GN=CRA1 PE=1	190	PFYLAGNNPQGQVW	NH2-PFYLAGNNPQGQVW-COOH	14	70	45	NH2			190_PFYLAGNNPQGQVW
Q39132		Q39132_ARATH At1g14950/F10B6_18 OS=Arabidopsis thaliana OX=3702 GN=MLP1 PE=2	74	ELDDQKMAVTFR	But4C13-ELDDQK<But4C13>M<Mox*>AVTFR-COOH	12	63	45	But4C13			74_ELDDQKMAVTFR	But
Q9FJP3		RK29_ARATH 50S ribosomal protein L29, chloroplastic OS=Arabidopsis thaliana OX=3702 GN=RPL29 PE=1	156	KLQEEEAAEEAAEAAKSA	NH2-K<But4C13>LQEEEAAEEAAEAAK<But4C13>SA-COOH	18	77	45	NH2			156_KLQEEEAAEEAAEAAKSA
P15456		CRU2_ARATH 12S seed storage protein CRB OS=Arabidopsis thaliana OX=3702 GN=CRB PE=1	37	ALEPSQIIKSEGGR	But-ALEPSQIIK<But>SEGGR-COOH	14	51	45	But			37_ALEPSQIIKSEGGR	But
Q9LF88		Y3304_ARATH Late embryogenesis abundant protein At3g53040 OS=Arabidopsis thaliana OX=3702 GN=At3g53040 PE=2	319	QKAVETKDTAKEKMDEAGEEAR	NH2-QK<But4C13>AVETK<But4C13>DTAK<But4C13>EK<But4C13>M<Mox*>DEAGEEAR-COOH	22	74	45	NH2			319_QKAVETKDTAKEKMDEAGEEAR
P15455		CRU1_ARATH 12S seed storage protein CRA1 OS=Arabidopsis thaliana OX=3702 GN=CRA1 PE=1	190	PFYLAGNNPQGQVW	NH2-PFYLAGNNPQGQVW-COOH	14	84	45	NH2			190_PFYLAGNNPQGQVW
Q9ZQ24		Q9ZQ24_ARATH Expressed protein OS=Arabidopsis thaliana OX=3702 GN=At2g24440 PE=2	2	ASKKVDGEGKGKAIANTR	Ace-ASK<But4C13>K<But4C13>VDGEGK<But4C13>GK<But4C13>AIANTR-COOH	18	64	42	Ace		Ace	2_ASKKVDGEGKGKAIANTR
Q9ZQ24		Q9ZQ24_ARATH Expressed protein OS=Arabidopsis thaliana OX=3702 GN=At2g24440 PE=2	2	ASKKVDGEGKGKAIANTR	Ace-ASK<But4C13>K<But4C13>VDGEGK<But4C13>GK<But4C13>AIANTR-COOH	18	48	42	Ace		Ace	2_ASKKVDGEGKGKAIANTR
Q9LQ55		DRP2B_ARATH Dynamin-2B OS=Arabidopsis thaliana OX=3702 GN=DRP2B PE=1	1	MEAIDELSQLSDSMR	Ace-M<Mox*>EAIDELSQLSDSM<Mox*>R-COOH	15	61	40	Ace		Ace	1_MEAIDELSQLSDSMR
Q9LF88		Y3304_ARATH Late embryogenesis abundant protein At3g53040 OS=Arabidopsis thaliana OX=3702 GN=At3g53040 PE=2	319	QKAVETKDTAKEKMDEAGEEAR	NH2-Q<Pyr>K<But>AVETK<But>DTAK<But>EK<But>M<Mox*>DEAGEEAR-COOH	22	83	45	NH2	Q<Pyr>		319_QKAVETKDTAKEKMDEAGEEAR
Q9FJP3		RK29_ARATH 50S ribosomal protein L29, chloroplastic OS=Arabidopsis thaliana OX=3702 GN=RPL29 PE=1	156	KLQEEEAAEEAAEAAKSA	NH2-K<But>LQEEEAAEEAAEAAK<But>SA-COOH	18	95	45	NH2			156_KLQEEEAAEEAAEAAKSA
Q9SIN3		Q9SIN3_ARATH Late embryogenesis abundant domain-containing protein / LEA domain-containing protein OS=Arabidopsis thaliana OX=3702 GN=At2g42560 PE=4	462	AAVAADTVVGYTAR	But4C13-AAVAADTVVGYTAR-COOH	14	93	45	But4C13			462_AAVAADTVVGYTAR	But
P15456		CRU2_ARATH 12S seed storage protein CRB OS=Arabidopsis thaliana OX=3702 GN=CRB PE=1	37	ALEPSQIIKSEGGR	But4C13-ALEPSQIIK<But4C13>SEGGR-COOH	14	58	44	But4C13			37_ALEPSQIIKSEGGR	But
P0DKC5	P0DKC6 (174-193)	HSD1A_ARATH 11-beta-hydroxysteroid dehydrogenase 1A OS=Arabidopsis thaliana OX=3702 GN=HSD1 PE=1	174	QSNGKIVAMSSSAAWLTAPR	NH2-Q<Pyr>SNGK<But4C13>IVAM<Mox*>SSSAAWLTAPR-COOH	20	75	46	NH2	Q<Pyr>		174_QSNGKIVAMSSSAAWLTAPR
F4K1D3	Q9FKI2 (2-12)^AQ9SJB9 (2-12)	F4K1D3_ARATH Nucleic acid-binding, OB-fold-like protein OS=Arabidopsis thaliana OX=3702 GN=MXH1.2 PE=3	2	PKNKGKGGKNR	But-PK<But>NK<But>GK<But>GGK<But>NR-COOH	11	56	42	But			2_PKNKGKGGKNR	But
F4KFJ2	Q9LFL3 (2-15)	F4KFJ2_ARATH Target of Myb protein 1 OS=Arabidopsis thaliana OX=3702 GN=At5g16880 PE=1	2	GDNLMDKVTAFGER	Ace-GDNLM<Mox*>DK<But4C13>VTAFGER-COOH	14	76	44	Ace		Ace	2_GDNLMDKVTAFGER
Q94EG6		Y5224_ARATH Uncharacterized protein At5g02240 OS=Arabidopsis thaliana OX=3702 GN=At5g02240 PE=1	2	ANLPTVLVTGASGR	Ace-ANLPTVLVTGASGR-COOH	14	63	45	Ace		Ace	2_ANLPTVLVTGASGR
Q39165		OLEO2_ARATH Oleosin 21.2 kDa OS=Arabidopsis thaliana OX=3702 GN=At5g40420 PE=2	137	TVPEQLEYAKR	But4C13-TVPEQLEYAK<But4C13>R-COOH	11	75	44	But4C13			137_TVPEQLEYAKR	But
P15460		2SS4_ARATH 2S seed storage protein 4 OS=Arabidopsis thaliana OX=3702 GN=AT2S4 PE=2	135	KIYQAAKYLPN	NH2-K<But4C13>IYQAAK<But4C13>YLPN-COOH	11	48	44	NH2			135_KIYQAAKYLPN
P15456		CRU2_ARATH 12S seed storage protein CRB OS=Arabidopsis thaliana OX=3702 GN=CRB PE=1	299	YISTLNSYNLPILR	NH2-YISTLNSYNLPILR-COOH	14	91	44	NH2			299_YISTLNSYNLPILR
Q9XII1		PDV2_ARATH Plastid division protein PDV2 OS=Arabidopsis thaliana OX=3702 GN=PDV2 PE=1	1	MEDEEGIGLILAR	Ace-M<Mox*>EDEEGIGLILAR-COOH	13	95	45	Ace		Ace	1_MEDEEGIGLILAR
Q9LF88		Y3304_ARATH Late embryogenesis abundant protein At3g53040 OS=Arabidopsis thaliana OX=3702 GN=At3g53040 PE=2	319	QKAVETKDTAKEKMDEAGEEAR	NH2-Q<Pyr>K<But4C13>AVETK<But4C13>DTAK<But4C13>EK<But4C13>M<Mox*>DEAGEEAR-COOH	22	78	45	NH2	Q<Pyr>		319_QKAVETKDTAKEKMDEAGEEAR
Q9LF88		Y3304_ARATH Late embryogenesis abundant protein At3g53040 OS=Arabidopsis thaliana OX=3702 GN=At3g53040 PE=2	319	QKAVETKDTAKEKMDEAGEEAR	NH2-QK<But4C13>AVETK<But4C13>DTAK<But4C13>EK<But4C13>M<Mox*>DEAGEEAR-COOH	22	65	45	NH2			319_QKAVETKDTAKEKMDEAGEEAR
Q9LF88		Y3304_ARATH Late embryogenesis abundant protein At3g53040 OS=Arabidopsis thaliana OX=3702 GN=At3g53040 PE=2	319	QKAVETKDTAKEKMDEAGEEAR	NH2-Q<Pyr>K<But4C13>AVETK<But4C13>DTAK<But4C13>EK<But4C13>M<Mox*>DEAGEEAR-COOH	22	90	45	NH2	Q<Pyr>		319_QKAVETKDTAKEKMDEAGEEAR
Q9SD78		Q9SD78_ARATH Furry OS=Arabidopsis thaliana OX=3702 GN=F13G24.260 PE=2	2	AKSVSTAASSLVQNLR	Ace-AK<But4C13>SVSTAASSLVQNLR-COOH	16	111	44	Ace		Ace	2_AKSVSTAASSLVQNLR
Q9LF88		Y3304_ARATH Late embryogenesis abundant protein At3g53040 OS=Arabidopsis thaliana OX=3702 GN=At3g53040 PE=2	319	QKAVETKDTAKEKMDEAGEEAR	NH2-Q<Pyr>K<But>AVETK<But>DTAK<But>EK<But>M<Mox*>DEAGEEAR-COOH	22	93	45	NH2	Q<Pyr>		319_QKAVETKDTAKEKMDEAGEEAR
Q9LF88		Y3304_ARATH Late embryogenesis abundant protein At3g53040 OS=Arabidopsis thaliana OX=3702 GN=At3g53040 PE=2	319	QKAVETKDTAKEKMDEAGEEAR	NH2-Q<Pyr>K<But>AVETK<But>DTAK<But>EK<But>M<Mox*>DEAGEEAR-COOH	22	126	45	NH2	Q<Pyr>		319_QKAVETKDTAKEKMDEAGEEAR
Q9LQ55		DRP2B_ARATH Dynamin-2B OS=Arabidopsis thaliana OX=3702 GN=DRP2B PE=1	1	MEAIDELSQLSDSMR	Ace-M<Mox*>EAIDELSQLSDSM<Mox*>R-COOH	15	55	40	Ace		Ace	1_MEAIDELSQLSDSMR
Q9FFE0		RRAA2_ARATH Putative 4-hydroxy-4-methyl-2-oxoglutarate aldolase 2 OS=Arabidopsis thaliana OX=3702 GN=At5g16450 PE=1	2	AFVTTAEVCDANQELIR	Ace-AFVTTAEVC<Cmm*>DANQELIR-COOH	17	87	45	Ace		Ace	2_AFVTTAEVCDANQELIR
P15455		CRU1_ARATH 12S seed storage protein CRA1 OS=Arabidopsis thaliana OX=3702 GN=CRA1 PE=1	190	PFYLAGNNPQGQVW	NH2-PFYLAGNNPQGQVW-COOH	14	57	44	NH2			190_PFYLAGNNPQGQVW
P15456		CRU2_ARATH 12S seed storage protein CRB OS=Arabidopsis thaliana OX=3702 GN=CRB PE=1	31	QLDQLNALEPSQIIKSEGGR	NH2-QLDQLNALEPSQIIK<But4C13>SEGGR-COOH	20	66	45	NH2			31_QLDQLNALEPSQIIKSEGGR
Q9LF88		Y3304_ARATH Late embryogenesis abundant protein At3g53040 OS=Arabidopsis thaliana OX=3702 GN=At3g53040 PE=2	319	QKAVETKDTAKEKMDEAGEEAR	NH2-QK<But4C13>AVETK<But4C13>DTAK<But4C13>EK<But4C13>M<Mox*>DEAGEEAR-COOH	22	62	45	NH2			319_QKAVETKDTAKEKMDEAGEEAR
P15456		CRU2_ARATH 12S seed storage protein CRB OS=Arabidopsis thaliana OX=3702 GN=CRB PE=1	31	QLDQLNALEPSQIIKSEGGR	NH2-QLDQLNALEPSQIIK<But>SEGGR-COOH	20	80	45	NH2			31_QLDQLNALEPSQIIKSEGGR
Q9LF88		Y3304_ARATH Late embryogenesis abundant protein At3g53040 OS=Arabidopsis thaliana OX=3702 GN=At3g53040 PE=2	319	QKAVETKDTAKEKMDEAGEEAR	NH2-Q<Pyr>K<But4C13>AVETK<But4C13>DTAK<But4C13>EK<But4C13>M<Mox*>DEAGEEAR-COOH	22	98	45	NH2	Q<Pyr>		319_QKAVETKDTAKEKMDEAGEEAR
Q9LF88		Y3304_ARATH Late embryogenesis abundant protein At3g53040 OS=Arabidopsis thaliana OX=3702 GN=At3g53040 PE=2	319	QKAVETKDTAKEKMDEAGEEAR	NH2-QK<But4C13>AVETK<But4C13>DTAK<But4C13>EK<But4C13>M<Mox*>DEAGEEAR-COOH	22	50	45	NH2			319_QKAVETKDTAKEKMDEAGEEAR
Q9FFE0		RRAA2_ARATH Putative 4-hydroxy-4-methyl-2-oxoglutarate aldolase 2 OS=Arabidopsis thaliana OX=3702 GN=At5g16450 PE=1	2	AFVTTAEVCDANQELIR	Ace-AFVTTAEVC<Cmm*>DANQELIR-COOH	17	123	45	Ace		Ace	2_AFVTTAEVCDANQELIR
Q9FFE0		RRAA2_ARATH Putative 4-hydroxy-4-methyl-2-oxoglutarate aldolase 2 OS=Arabidopsis thaliana OX=3702 GN=At5g16450 PE=1	2	AFVTTAEVCDANQELIR	Ace-AFVTTAEVC<Cmm*>DANQELIR-COOH	17	113	45	Ace		Ace	2_AFVTTAEVCDANQELIR
P25858		G3PC1_ARATH Glyceraldehyde-3-phosphate dehydrogenase GAPC1, cytosolic OS=Arabidopsis thaliana OX=3702 GN=GAPC1 PE=1	85	NPEDIPWAEAGADYVVE	NH2-NPEDIPWAEAGADYVVE-COOH	17	63	42	NH2			85_NPEDIPWAEAGADYVVE
Q941D5		VPS2C_ARATH Vacuolar protein sorting-associated protein 2 homolog 3 OS=Arabidopsis thaliana OX=3702 GN=VPS2.3 PE=2	1	MNIFTKKPNPR	Ace-M<Mox*>NIFTK<But4C13>K<But4C13>PNPR-COOH	11	79	44	Ace		Ace	1_MNIFTKKPNPR
P34790		CP18C_ARATH Peptidyl-prolyl cis-trans isomerase CYP18-3 OS=Arabidopsis thaliana OX=3702 GN=CYP18-3 PE=1	2	AFPKVYFDMTIDGQPAGR	NH2-AFPK<But4C13>VYFDM<Mox*>TIDGQPAGR-COOH	18	47	45	NH2			2_AFPKVYFDMTIDGQPAGR
Q9LF88		Y3304_ARATH Late embryogenesis abundant protein At3g53040 OS=Arabidopsis thaliana OX=3702 GN=At3g53040 PE=2	218	KAKETAEYTSDKAR	But4C13-K<But4C13>AK<But4C13>ETAEYTSDK<But4C13>AR-COOH	14	50	45	But4C13			218_KAKETAEYTSDKAR	But
F4KFJ2	Q9LFL3 (2-15)	F4KFJ2_ARATH Target of Myb protein 1 OS=Arabidopsis thaliana OX=3702 GN=At5g16880 PE=1	2	GDNLMDKVTAFGER	Ace-GDNLM<Mox*>DK<But4C13>VTAFGER-COOH	14	69	44	Ace		Ace	2_GDNLMDKVTAFGER
Q9SSL1		CAR7_ARATH Protein C2-DOMAIN ABA-RELATED 7 OS=Arabidopsis thaliana OX=3702 GN=CAR7 PE=1	1	MEELVGLLR	Ace-M<Mox*>EELVGLLR-COOH	9	50	46	Ace		Ace	1_MEELVGLLR
P15456		CRU2_ARATH 12S seed storage protein CRB OS=Arabidopsis thaliana OX=3702 GN=CRB PE=1	360	VFDQEISSGQLLVVPQ	NH2-VFDQEISSGQLLVVPQ-COOH	16	62	46	NH2			360_VFDQEISSGQLLVVPQ
Q9SD78		Q9SD78_ARATH Furry OS=Arabidopsis thaliana OX=3702 GN=F13G24.260 PE=2	2	AKSVSTAASSLVQNLR	Ace-AK<But4C13>SVSTAASSLVQNLR-COOH	16	115	44	Ace		Ace	2_AKSVSTAASSLVQNLR
P57106	P93819 (8-24)	MDHC2_ARATH Malate dehydrogenase 2, cytoplasmic OS=Arabidopsis thaliana OX=3702 GN=MDH2 PE=1	8	VLVTGAAGQIGYALVPM	NH2-VLVTGAAGQIGYALVPM<Mox*>-COOH	17	46	45	NH2			8_VLVTGAAGQIGYALVPM
Q94BT9		ATOX1_ARATH Copper transport protein ATX1 OS=Arabidopsis thaliana OX=3702 GN=ATX1 PE=1	63	KTAFWEAEGETAKA	NH2-K<But4C13>TAFWEAEGETAK<But4C13>A-COOH	14	65	45	NH2			63_KTAFWEAEGETAKA
Q9M117		ARC5A_ARATH Actin-related protein 2/3 complex subunit 5A OS=Arabidopsis thaliana OX=3702 GN=ARPC5A PE=1	2	AEFVEADNAEAIIAR	Ace-AEFVEADNAEAIIAR-COOH	15	105	45	Ace		Ace	2_AEFVEADNAEAIIAR
Q9FFE0		RRAA2_ARATH Putative 4-hydroxy-4-methyl-2-oxoglutarate aldolase 2 OS=Arabidopsis thaliana OX=3702 GN=At5g16450 PE=1	2	AFVTTAEVCDANQELIR	Ace-AFVTTAEVC<Cmm*>DANQELIR-COOH	17	120	45	Ace		Ace	2_AFVTTAEVCDANQELIR
A8MQP1	F4JTV4 (2-12)^AO23255 (2-12)^AQ9LK36 (2-12)	A8MQP1_ARATH S-adenosyl-L-homocysteine hydrolase OS=Arabidopsis thaliana OX=3702 GN=HOG1 PE=4	2	ALLVEKTSSGR	Ace-ALLVEK<But4C13>TSSGR-COOH	11	62	44	Ace		Ace	2_ALLVEKTSSGR
Q9FL96		SEM12_ARATH Protein DSS1 HOMOLOG ON CHROMOSOME V OS=Arabidopsis thaliana OX=3702 GN=DSS1(V) PE=1	62	LKKELENASEKK	NH2-LK<But4C13>K<But4C13>ELENASEK<But4C13>K<But4C13>-COOH	12	68	40	NH2			62_LKKELENASEKK
Q9SSL1		CAR7_ARATH Protein C2-DOMAIN ABA-RELATED 7 OS=Arabidopsis thaliana OX=3702 GN=CAR7 PE=1	1	MEELVGLLR	Ace-M<Mox*>EELVGLLR-COOH	9	57	46	Ace		Ace	1_MEELVGLLR
Q9ZQ24		Q9ZQ24_ARATH Expressed protein OS=Arabidopsis thaliana OX=3702 GN=At2g24440 PE=2	2	ASKKVDGEGKGKAIANTR	Ace-ASK<But4C13>K<But4C13>VDGEGK<But4C13>GK<But4C13>AIANTR-COOH	18	63	42	Ace		Ace	2_ASKKVDGEGKGKAIANTR
Q9FL96		SEM12_ARATH Protein DSS1 HOMOLOG ON CHROMOSOME V OS=Arabidopsis thaliana OX=3702 GN=DSS1(V) PE=1	62	LKKELENASEKK	NH2-LK<But4C13>K<But4C13>ELENASEK<But4C13>K<But4C13>-COOH	12	57	40	NH2			62_LKKELENASEKK
Q9SSB8		CX5B2_ARATH Cytochrome c oxidase subunit 5b-2, mitochondrial OS=Arabidopsis thaliana OX=3702 GN=COX5B-2 PE=1	54	IGSAAADTAVKKR	But4C13-IGSAAADTAVK<But4C13>K<But4C13>R-COOH	13	98	42	But4C13			54_IGSAAADTAVKKR	But
Q9FKB0		LSM5_ARATH Sm-like protein LSM5 OS=Arabidopsis thaliana OX=3702 GN=LSM5 PE=1	2	ANNPSQLLPSELIDR	Ace-ANNPSQLLPSELIDR-COOH	15	79	46	Ace		Ace	2_ANNPSQLLPSELIDR
O81822		HS177_ARATH 17.7 kDa class II heat shock protein OS=Arabidopsis thaliana OX=3702 GN=HSP17.7 PE=2	92	KENEGVKFVR	But4C13-K<But4C13>ENEGVK<But4C13>FVR-COOH	10	62	44	But4C13			92_KENEGVKFVR	But
P57106	P93819 (8-24)	MDHC2_ARATH Malate dehydrogenase 2, cytoplasmic OS=Arabidopsis thaliana OX=3702 GN=MDH2 PE=1	8	VLVTGAAGQIGYALVPM	NH2-VLVTGAAGQIGYALVPM<Mox*>-COOH	17	48	45	NH2			8_VLVTGAAGQIGYALVPM
Q9ZQ24		Q9ZQ24_ARATH Expressed protein OS=Arabidopsis thaliana OX=3702 GN=At2g24440 PE=2	2	ASKKVDGEGKGKAIANTR	Ace-ASK<But4C13>K<But4C13>VDGEGK<But4C13>GK<But4C13>AIANTR-COOH	18	119	42	Ace		Ace	2_ASKKVDGEGKGKAIANTR
Q9FFE0		RRAA2_ARATH Putative 4-hydroxy-4-methyl-2-oxoglutarate aldolase 2 OS=Arabidopsis thaliana OX=3702 GN=At5g16450 PE=1	2	AFVTTAEVCDANQELIR	Ace-AFVTTAEVC<Cmm*>DANQELIR-COOH	17	117	44	Ace		Ace	2_AFVTTAEVCDANQELIR
Q9ZQ24		Q9ZQ24_ARATH Expressed protein OS=Arabidopsis thaliana OX=3702 GN=At2g24440 PE=2	2	ASKKVDGEGKGKAIANTR	Ace-ASK<But4C13>K<But4C13>VDGEGK<But4C13>GK<But4C13>AIANTR-COOH	18	133	42	Ace		Ace	2_ASKKVDGEGKGKAIANTR
Q39132		Q39132_ARATH At1g14950/F10B6_18 OS=Arabidopsis thaliana OX=3702 GN=MLP1 PE=2	2	ATSGTYVTEVPLKGSAKNH	Ace-ATSGTYVTEVPLK<But4C13>GSAK<But4C13>NH-COOH	19	90	45	Ace		Ace	2_ATSGTYVTEVPLKGSAKNH
Q9FFE0		RRAA2_ARATH Putative 4-hydroxy-4-methyl-2-oxoglutarate aldolase 2 OS=Arabidopsis thaliana OX=3702 GN=At5g16450 PE=1	2	AFVTTAEVCDANQELIR	Ace-AFVTTAEVC<Cmm*>DANQELIR-COOH	17	95	44	Ace		Ace	2_AFVTTAEVCDANQELIR
Q9FFE0		RRAA2_ARATH Putative 4-hydroxy-4-methyl-2-oxoglutarate aldolase 2 OS=Arabidopsis thaliana OX=3702 GN=At5g16450 PE=1	2	AFVTTAEVCDANQELIR	Ace-AFVTTAEVC<Cmm*>DANQELIR-COOH	17	52	44	Ace		Ace	2_AFVTTAEVCDANQELIR
Q39132		Q39132_ARATH At1g14950/F10B6_18 OS=Arabidopsis thaliana OX=3702 GN=MLP1 PE=2	2	ATSGTYVTEVPLKGSAKNH	Ace-ATSGTYVTEVPLK<But>GSAK<But>NH-COOH	19	101	45	Ace		Ace	2_ATSGTYVTEVPLKGSAKNH
Q39132		Q39132_ARATH At1g14950/F10B6_18 OS=Arabidopsis thaliana OX=3702 GN=MLP1 PE=2	2	ATSGTYVTEVPLKGSAKNH	Ace-ATSGTYVTEVPLK<But4C13>GSAK<But4C13>NH-COOH	19	96	45	Ace		Ace	2_ATSGTYVTEVPLKGSAKNH
O64866		O64866_ARATH Calcium-binding EF-hand family protein OS=Arabidopsis thaliana OX=3702 GN=At2g44310 PE=1	2	GVVLIDGSTVR	But-GVVLIDGSTVR-COOH	11	83	45	But			2_GVVLIDGSTVR	But
Q9ZQ24		Q9ZQ24_ARATH Expressed protein OS=Arabidopsis thaliana OX=3702 GN=At2g24440 PE=2	2	ASKKVDGEGKGKAIANTR	Ace-ASK<But4C13>K<But4C13>VDGEGK<But4C13>GK<But4C13>AIANTR-COOH	18	88	41	Ace		Ace	2_ASKKVDGEGKGKAIANTR
P15456		CRU2_ARATH 12S seed storage protein CRB OS=Arabidopsis thaliana OX=3702 GN=CRB PE=1	360	VFDQEISSGQLLVVPQ	NH2-VFDQEISSGQLLVVPQ-COOH	16	53	46	NH2			360_VFDQEISSGQLLVVPQ
F4HXW5	Q39133 (2-20)	F4HXW5_ARATH Polyketide cyclase/dehydrase and lipid transport superfamily protein OS=Arabidopsis thaliana OX=3702 GN=At1g14940 PE=4	2	AMSGTYVAEVPLKGSAEKH	Ace-AM<Mox*>SGTYVAEVPLK<But4C13>GSAEK<But4C13>H-COOH	19	92	45	Ace		Ace	2_AMSGTYVAEVPLKGSAEKH
Q9FL96		SEM12_ARATH Protein DSS1 HOMOLOG ON CHROMOSOME V OS=Arabidopsis thaliana OX=3702 GN=DSS1(V) PE=1	62	LKKELENASEKK	NH2-LK<But4C13>K<But4C13>ELENASEK<But4C13>K<But4C13>-COOH	12	52	40	NH2			62_LKKELENASEKK
Q9M117		ARC5A_ARATH Actin-related protein 2/3 complex subunit 5A OS=Arabidopsis thaliana OX=3702 GN=ARPC5A PE=1	2	AEFVEADNAEAIIAR	Ace-AEFVEADNAEAIIAR-COOH	15	102	45	Ace		Ace	2_AEFVEADNAEAIIAR
Q9FFE0		RRAA2_ARATH Putative 4-hydroxy-4-methyl-2-oxoglutarate aldolase 2 OS=Arabidopsis thaliana OX=3702 GN=At5g16450 PE=1	2	AFVTTAEVCDANQELIR	Ace-AFVTTAEVC<Cmm*>DANQELIR-COOH	17	91	44	Ace		Ace	2_AFVTTAEVCDANQELIR
F4HXW5	Q39133 (2-20)	F4HXW5_ARATH Polyketide cyclase/dehydrase and lipid transport superfamily protein OS=Arabidopsis thaliana OX=3702 GN=At1g14940 PE=4	2	AMSGTYVAEVPLKGSAEKH	Ace-AM<Mox*>SGTYVAEVPLK<But>GSAEK<But>H-COOH	19	81	45	Ace		Ace	2_AMSGTYVAEVPLKGSAEKH
Q39132		Q39132_ARATH At1g14950/F10B6_18 OS=Arabidopsis thaliana OX=3702 GN=MLP1 PE=2	2	ATSGTYVTEVPLKGSAKNHYKR	Ace-ATSGTYVTEVPLK<But4C13>GSAK<But4C13>NHYK<But4C13>R-COOH	22	47	44	Ace		Ace	2_ATSGTYVTEVPLKGSAKNHYKR
P0DKC5	P0DKC6 (174-193)	HSD1A_ARATH 11-beta-hydroxysteroid dehydrogenase 1A OS=Arabidopsis thaliana OX=3702 GN=HSD1 PE=1	174	QSNGKIVAMSSSAAWLTAPR	NH2-Q<Pyr>SNGK<But4C13>IVAM<Mox*>SSSAAWLTAPR-COOH	20	59	46	NH2	Q<Pyr>		174_QSNGKIVAMSSSAAWLTAPR
Q9SSL1		CAR7_ARATH Protein C2-DOMAIN ABA-RELATED 7 OS=Arabidopsis thaliana OX=3702 GN=CAR7 PE=1	1	MEELVGLLR	Ace-M<Mox*>EELVGLLR-COOH	9	61	46	Ace		Ace	1_MEELVGLLR
F4HXW5	Q39133 (2-20)	F4HXW5_ARATH Polyketide cyclase/dehydrase and lipid transport superfamily protein OS=Arabidopsis thaliana OX=3702 GN=At1g14940 PE=4	2	AMSGTYVAEVPLKGSAEKH	Ace-AM<Mox*>SGTYVAEVPLK<But>GSAEK<But>H-COOH	19	88	45	Ace		Ace	2_AMSGTYVAEVPLKGSAEKH
P0DKC5	P0DKC6 (174-193)	HSD1A_ARATH 11-beta-hydroxysteroid dehydrogenase 1A OS=Arabidopsis thaliana OX=3702 GN=HSD1 PE=1	174	QSNGKIVAMSSSAAWLTAPR	NH2-Q<Pyr>SNGK<But4C13>IVAM<Mox*>SSSAAWLTAPR-COOH	20	93	46	NH2	Q<Pyr>		174_QSNGKIVAMSSSAAWLTAPR
Q9FKB0		LSM5_ARATH Sm-like protein LSM5 OS=Arabidopsis thaliana OX=3702 GN=LSM5 PE=1	2	ANNPSQLLPSELIDR	Ace-ANNPSQLLPSELIDR-COOH	15	64	46	Ace		Ace	2_ANNPSQLLPSELIDR
Q9ZVF2		ML329_ARATH MLP-like protein 329 OS=Arabidopsis thaliana OX=3702 GN=MLP329 PE=2	2	ATSGTYVTEVPLKGSADKHYKR	Ace-ATSGTYVTEVPLK<But4C13>GSADK<But4C13>HYK<But4C13>R-COOH	22	86	44	Ace		Ace	2_ATSGTYVTEVPLKGSADKHYKR
Q9SIN3		Q9SIN3_ARATH Late embryogenesis abundant domain-containing protein / LEA domain-containing protein OS=Arabidopsis thaliana OX=3702 GN=At2g42560 PE=4	229	DTVAEKGQQAKESVGEGAQKAGSATSEKAQR	NH2-DTVAEK<But4C13>GQQAK<But4C13>ESVGEGAQK<But4C13>AGSATSEK<But4C13>AQR-COOH	31	140	45	NH2			229_DTVAEKGQQAKESVGEGAQKAGSATSEKAQR
P34790		CP18C_ARATH Peptidyl-prolyl cis-trans isomerase CYP18-3 OS=Arabidopsis thaliana OX=3702 GN=CYP18-3 PE=1	79	GTGGESIYGSKFEDENFER	But-GTGGESIYGSK<But>FEDENFER-COOH	19	62	40	But			79_GTGGESIYGSKFEDENFER	But
Q9ZVF2		ML329_ARATH MLP-like protein 329 OS=Arabidopsis thaliana OX=3702 GN=MLP329 PE=2	2	ATSGTYVTEVPLKGSADKHYKR	Ace-ATSGTYVTEVPLK<But4C13>GSADK<But4C13>HYK<But4C13>R-COOH	22	106	45	Ace		Ace	2_ATSGTYVTEVPLKGSADKHYKR
Q9ZVF2		ML329_ARATH MLP-like protein 329 OS=Arabidopsis thaliana OX=3702 GN=MLP329 PE=2	2	ATSGTYVTEVPLKGSADKHYKR	Ace-ATSGTYVTEVPLK<But>GSADK<But>HYK<But>R-COOH	22	134	45	Ace		Ace	2_ATSGTYVTEVPLKGSADKHYKR
Q9ZVF2		ML329_ARATH MLP-like protein 329 OS=Arabidopsis thaliana OX=3702 GN=MLP329 PE=2	2	ATSGTYVTEVPLKGSADKHYKR	Ace-ATSGTYVTEVPLK<But>GSADK<But>HYK<But>R-COOH	22	64	45	Ace		Ace	2_ATSGTYVTEVPLKGSADKHYKR
Q3E8H9	Q9FKV7 (104-121)	Q3E8H9_ARATH Late embryogenesis abundant protein (LEA) family protein OS=Arabidopsis thaliana OX=3702 GN=At5g44310 PE=4	68	TKDYAEQTKNKVNEGASR	But4C13-TK<But4C13>DYAEQTK<But4C13>NK<But4C13>VNEGASR-COOH	18	55	45	But4C13			68_TKDYAEQTKNKVNEGASR	But
O65421	Q9S9T7 (2-11)	VP281_ARATH Vacuolar protein sorting-associated protein 28 homolog 1 OS=Arabidopsis thaliana OX=3702 GN=VPS28-1 PE=1	1	MEVKLWNDKR	Ace-M<Mox*>EVK<But4C13>LWNDK<But4C13>R-COOH	10	74	45	Ace		Ace	1_MEVKLWNDKR
Q39132		Q39132_ARATH At1g14950/F10B6_18 OS=Arabidopsis thaliana OX=3702 GN=MLP1 PE=2	2	ATSGTYVTEVPLKGSAKNHYKR	Ace-ATSGTYVTEVPLK<But>GSAK<But>NHYK<But>R-COOH	22	95	45	Ace		Ace	2_ATSGTYVTEVPLKGSAKNHYKR
Q39132		Q39132_ARATH At1g14950/F10B6_18 OS=Arabidopsis thaliana OX=3702 GN=MLP1 PE=2	2	ATSGTYVTEVPLKGSAKNHYKR	Ace-ATSGTYVTEVPLK<But4C13>GSAK<But4C13>NHYK<But4C13>R-COOH	22	159	44	Ace		Ace	2_ATSGTYVTEVPLKGSAKNHYKR
Q9SLA8		FABI_ARATH Enoyl-[acyl-carrier-protein] reductase [NADH], chloroplastic OS=Arabidopsis thaliana OX=3702 GN=MOD1 PE=1	77	SESSENKAPSGLPIDLR	But-SESSENK<But>APSGLPIDLR-COOH	17	71	45	But			77_SESSENKAPSGLPIDLR	But
O23523		RGGA_ARATH RGG repeats nuclear RNA binding protein A OS=Arabidopsis thaliana OX=3702 GN=RGGA PE=1	337	NEAAPAIGDAAQFPSLGGK	NH2-NEAAPAIGDAAQFPSLGGK<But4C13>-COOH	19	67	46	NH2			337_NEAAPAIGDAAQFPSLGGK
Q9FL96		SEM12_ARATH Protein DSS1 HOMOLOG ON CHROMOSOME V OS=Arabidopsis thaliana OX=3702 GN=DSS1(V) PE=1	62	LKKELENASEKK	NH2-LK<But>K<But>ELENASEK<But>K<But>-COOH	12	54	43	NH2			62_LKKELENASEKK
Q9SIN3		Q9SIN3_ARATH Late embryogenesis abundant domain-containing protein / LEA domain-containing protein OS=Arabidopsis thaliana OX=3702 GN=At2g42560 PE=4	229	DTVAEKGQQAKESVGEGAQKAGSATSEKAQR	NH2-DTVAEK<But4C13>GQQAK<But4C13>ESVGEGAQK<But4C13>AGSATSEK<But4C13>AQR-COOH	31	103	45	NH2			229_DTVAEKGQQAKESVGEGAQKAGSATSEKAQR
P15455		CRU1_ARATH 12S seed storage protein CRA1 OS=Arabidopsis thaliana OX=3702 GN=CRA1 PE=1	190	PFYLAGNNPQGQVWLQG	NH2-PFYLAGNNPQGQVWLQG-COOH	17	51	45	NH2			190_PFYLAGNNPQGQVWLQG
Q9S831		PSAE1_ARATH Photosystem I reaction center subunit IV A, chloroplastic OS=Arabidopsis thaliana OX=3702 GN=PSAE1 PE=1	123	VNYANISTNNYALDEVEEVAA	NH2-VNYANISTNNYALDEVEEVAA-COOH	21	64	43	NH2			123_VNYANISTNNYALDEVEEVAA
Q9SUE9		Q9SUE9_ARATH DNA ligase OS=Arabidopsis thaliana OX=3702 GN=At4g08310 PE=1	244	KPVSKKVKSTPAKN	NH2-K<But4C13>PVSK<But4C13>K<But4C13>VK<But4C13>STPAK<But4C13>N-COOH	14	46	30	NH2			244_KPVSKKVKSTPAKN
P15455		CRU1_ARATH 12S seed storage protein CRA1 OS=Arabidopsis thaliana OX=3702 GN=CRA1 PE=1	190	PFYLAGNNPQGQVWLQ	NH2-PFYLAGNNPQGQVWLQ-COOH	16	62	45	NH2			190_PFYLAGNNPQGQVWLQ
F4K5K0	F4K5K1 (2-31)^AQ940X7 (2-31)	F4K5K0_ARATH RING-box 1 OS=Arabidopsis thaliana OX=3702 GN=RBX1 PE=1	2	ATLDSDVTMIPAGEASSSVAASSSNKKAKR	Ace-ATLDSDVTM<Mox*>IPAGEASSSVAASSSNK<But>K<But>AK<But>R-COOH	30	118	45	Ace		Ace	2_ATLDSDVTMIPAGEASSSVAASSSNKKAKR
Q9SIN3		Q9SIN3_ARATH Late embryogenesis abundant domain-containing protein / LEA domain-containing protein OS=Arabidopsis thaliana OX=3702 GN=At2g42560 PE=4	229	DTVAEKGQQAKESVGEGAQKAGSATSEKAQR	NH2-DTVAEK<But4C13>GQQAK<But4C13>ESVGEGAQK<But4C13>AGSATSEK<But4C13>AQR-COOH	31	131	45	NH2			229_DTVAEKGQQAKESVGEGAQKAGSATSEKAQR
Q9FFE0		RRAA2_ARATH Putative 4-hydroxy-4-methyl-2-oxoglutarate aldolase 2 OS=Arabidopsis thaliana OX=3702 GN=At5g16450 PE=1	2	AFVTTAEVCDANQELIR	Ace-AFVTTAEVC<Cmm*>DANQELIR-COOH	17	101	45	Ace		Ace	2_AFVTTAEVCDANQELIR
Q9SIN3		Q9SIN3_ARATH Late embryogenesis abundant domain-containing protein / LEA domain-containing protein OS=Arabidopsis thaliana OX=3702 GN=At2g42560 PE=4	229	DTVAEKGQQAKESVGEGAQKAGSATSEKAQR	NH2-DTVAEK<But4C13>GQQAK<But4C13>ESVGEGAQK<But4C13>AGSATSEK<But4C13>AQR-COOH	31	83	45	NH2			229_DTVAEKGQQAKESVGEGAQKAGSATSEKAQR
A8MQP1	F4JTV4 (2-12)^AO23255 (2-12)^AQ9LK36 (2-12)	A8MQP1_ARATH S-adenosyl-L-homocysteine hydrolase OS=Arabidopsis thaliana OX=3702 GN=HOG1 PE=4	2	ALLVEKTSSGR	Ace-ALLVEK<But4C13>TSSGR-COOH	11	64	44	Ace		Ace	2_ALLVEKTSSGR
P34790		CP18C_ARATH Peptidyl-prolyl cis-trans isomerase CYP18-3 OS=Arabidopsis thaliana OX=3702 GN=CYP18-3 PE=1	79	GTGGESIYGSKFEDENFER	But4C13-GTGGESIYGSK<But4C13>FEDENFER-COOH	19	116	42	But4C13			79_GTGGESIYGSKFEDENFER	But
P34790		CP18C_ARATH Peptidyl-prolyl cis-trans isomerase CYP18-3 OS=Arabidopsis thaliana OX=3702 GN=CYP18-3 PE=1	79	GTGGESIYGSKFEDENFER	But-GTGGESIYGSK<But>FEDENFER-COOH	19	72	40	But			79_GTGGESIYGSKFEDENFER	But
Q9SIN3		Q9SIN3_ARATH Late embryogenesis abundant domain-containing protein / LEA domain-containing protein OS=Arabidopsis thaliana OX=3702 GN=At2g42560 PE=4	516	GSEKDVYGYGAKGIPGEGR	But4C13-GSEK<But4C13>DVYGYGAK<But4C13>GIPGEGR-COOH	19	96	45	But4C13			516_GSEKDVYGYGAKGIPGEGR	But
Q8H0Y9		Q8H0Y9_ARATH Acyl-CoA N-acyltransferases (NAT) superfamily protein OS=Arabidopsis thaliana OX=3702 GN=At1g21770 PE=2	2	ATGTATEKPKIVWNEGR	Ace-ATGTATEK<But4C13>PK<But4C13>IVWNEGR-COOH	17	80	45	Ace		Ace	2_ATGTATEKPKIVWNEGR
Q9SIN3		Q9SIN3_ARATH Late embryogenesis abundant domain-containing protein / LEA domain-containing protein OS=Arabidopsis thaliana OX=3702 GN=At2g42560 PE=4	516	GSEKDVYGYGAKGIPGEGR	But-GSEK<But>DVYGYGAK<But>GIPGEGR-COOH	19	67	45	But			516_GSEKDVYGYGAKGIPGEGR	But
Q9FJE8		H2A7_ARATH Probable histone H2A.7 OS=Arabidopsis thaliana OX=3702 GN=At5g59870 PE=1	1	MESTGKVKKAFGGR	Ace-M<Mox*>ESTGK<But4C13>VK<But4C13>K<But4C13>AFGGR-COOH	14	58	45	Ace		Ace	1_MESTGKVKKAFGGR
Q9FJE8		H2A7_ARATH Probable histone H2A.7 OS=Arabidopsis thaliana OX=3702 GN=At5g59870 PE=1	1	MESTGKVKKAFGGR	Ace-M<Mox*>ESTGK<But4C13>VK<But4C13>K<But4C13>AFGGR-COOH	14	85	45	Ace		Ace	1_MESTGKVKKAFGGR
P34790		CP18C_ARATH Peptidyl-prolyl cis-trans isomerase CYP18-3 OS=Arabidopsis thaliana OX=3702 GN=CYP18-3 PE=1	79	GTGGESIYGSKFEDENFER	But4C13-GTGGESIYGSK<But4C13>FEDENFER-COOH	19	83	42	But4C13			79_GTGGESIYGSKFEDENFER	But
Q9FI15	Q9SUN5 (2-16)	Q9FI15_ARATH Small nuclear ribonucleoprotein-associated protein OS=Arabidopsis thaliana OX=3702 GN=MFC16.18 PE=2	2	SMSKSSKMLQFINYR	Ace-SM<Mox*>SK<But>SSK<But>M<Mox*>LQFINYR-COOH	15	100	45	Ace		Ace	2_SMSKSSKMLQFINYR
Q9FHR8		DCI1_ARATH Delta(3,5)-Delta(2,4)-dienoyl-CoA isomerase, peroxisomal OS=Arabidopsis thaliana OX=3702 GN=DCI1 PE=2	2	TMESYKTLEIIR	Ace-TM<Mox*>ESYK<But4C13>TLEIIR-COOH	12	69	46	Ace		Ace	2_TMESYKTLEIIR
P15455		CRU1_ARATH 12S seed storage protein CRA1 OS=Arabidopsis thaliana OX=3702 GN=CRA1 PE=1	25	QGQQGQQFPNECQLDQLNALEPSHVLKSEAGR	NH2-QGQQGQQFPNEC<Cmm*>QLDQLNALEPSHVLK<But4C13>SEAGR-COOH	32	52	43	NH2			25_QGQQGQQFPNECQLDQLNALEPSHVLKSEAGR
Q9ZVL0		Q9ZVL0_ARATH Glycoprotein membrane GPI-anchored OS=Arabidopsis thaliana OX=3702 GN=T22H22.25 PE=2	29	NQAEDNLLQGLNSYR	But4C13-NQAEDNLLQGLNSYR-COOH	15	82	45	But4C13			29_NQAEDNLLQGLNSYR	But
Q9FI15	Q9SUN5 (2-16)	Q9FI15_ARATH Small nuclear ribonucleoprotein-associated protein OS=Arabidopsis thaliana OX=3702 GN=MFC16.18 PE=2	2	SMSKSSKMLQFINYR	Ace-SM<Mox*>SK<But4C13>SSK<But4C13>M<Mox*>LQFINYR-COOH	15	66	46	Ace		Ace	2_SMSKSSKMLQFINYR
P15455		CRU1_ARATH 12S seed storage protein CRA1 OS=Arabidopsis thaliana OX=3702 GN=CRA1 PE=1	190	PFYLAGNNPQGQVWLQ	NH2-PFYLAGNNPQGQVWLQ-COOH	16	72	45	NH2			190_PFYLAGNNPQGQVWLQ
Q9FHR8		DCI1_ARATH Delta(3,5)-Delta(2,4)-dienoyl-CoA isomerase, peroxisomal OS=Arabidopsis thaliana OX=3702 GN=DCI1 PE=2	2	TMESYKTLEIIR	Ace-TM<Mox*>ESYK<But>TLEIIR-COOH	12	49	45	Ace		Ace	2_TMESYKTLEIIR
Q9M117		ARC5A_ARATH Actin-related protein 2/3 complex subunit 5A OS=Arabidopsis thaliana OX=3702 GN=ARPC5A PE=1	2	AEFVEADNAEAIIAR	Ace-AEFVEADNAEAIIAR-COOH	15	84	45	Ace		Ace	2_AEFVEADNAEAIIAR
P34790		CP18C_ARATH Peptidyl-prolyl cis-trans isomerase CYP18-3 OS=Arabidopsis thaliana OX=3702 GN=CYP18-3 PE=1	79	GTGGESIYGSKFEDENFER	But-GTGGESIYGSK<But>FEDENFER-COOH	19	97	40	But			79_GTGGESIYGSKFEDENFER	But
Q949U7		PRX2E_ARATH Peroxiredoxin-2E, chloroplastic OS=Arabidopsis thaliana OX=3702 GN=PRXIIE PE=1	160	KDLGINDEVMLLSDGN	NH2-K<But4C13>DLGINDEVM<Mox*>LLSDGN-COOH	16	51	45	NH2			160_KDLGINDEVMLLSDGN
Q9LD45		BI1_ARATH Bax inhibitor 1 OS=Arabidopsis thaliana OX=3702 GN=BI-1 PE=1	1	MDAFSSFFDSQPGSR	Ace-M<Mox*>DAFSSFFDSQPGSR-COOH	15	93	37	Ace		Ace	1_MDAFSSFFDSQPGSR
F4I4Q9	Q9C8R4 (2-13)	F4I4Q9_ARATH SGS domain-containing protein OS=Arabidopsis thaliana OX=3702 GN=At1g30070 PE=1	2	AEEVGLDLEELR	Ace-AEEVGLDLEELR-COOH	12	84	45	Ace		Ace	2_AEEVGLDLEELR
Q9MA63		Y3550_ARATH REF/SRPP-like protein At3g05500 OS=Arabidopsis thaliana OX=3702 GN=At3g05500 PE=1	2	ATQTDLAQPKLDMTKEEKER	Ace-ATQTDLAQPK<But>LDM<Mox*>TK<But>EEK<But>ER-COOH	20	52	45	Ace		Ace	2_ATQTDLAQPKLDMTKEEKER
Q9LF88		Y3304_ARATH Late embryogenesis abundant protein At3g53040 OS=Arabidopsis thaliana OX=3702 GN=At3g53040 PE=2	130	KTKETADYAAEKAR	But4C13-K<But4C13>TK<But4C13>ETADYAAEK<But4C13>AR-COOH	14	117	44	But4C13			130_KTKETADYAAEKAR	But
Q9MA63		Y3550_ARATH REF/SRPP-like protein At3g05500 OS=Arabidopsis thaliana OX=3702 GN=At3g05500 PE=1	2	ATQTDLAQPKLDMTKEEKER	Ace-ATQTDLAQPK<But4C13>LDM<Mox*>TK<But4C13>EEK<But4C13>ER-COOH	20	52	45	Ace		Ace	2_ATQTDLAQPKLDMTKEEKER
Q9MA63		Y3550_ARATH REF/SRPP-like protein At3g05500 OS=Arabidopsis thaliana OX=3702 GN=At3g05500 PE=1	2	ATQTDLAQPKLDMTKEEKER	Ace-ATQTDLAQPK<But4C13>LDM<Mox*>TK<But4C13>EEK<But4C13>ER-COOH	20	52	45	Ace		Ace	2_ATQTDLAQPKLDMTKEEKER
P15455		CRU1_ARATH 12S seed storage protein CRA1 OS=Arabidopsis thaliana OX=3702 GN=CRA1 PE=1	24	QQGQQGQQFPNECQLDQLNALEPSHVLKSEAGR	NH2-QQGQQGQQFPNEC<Cmm*>QLDQLNALEPSHVLK<But4C13>SEAGR-COOH	33	64	43	NH2			24_QQGQQGQQFPNECQLDQLNALEPSHVLKSEAGR
Q9S831		PSAE1_ARATH Photosystem I reaction center subunit IV A, chloroplastic OS=Arabidopsis thaliana OX=3702 GN=PSAE1 PE=1	123	VNYANISTNNYALDEVEEVAA	NH2-VNYANISTNNYALDEVEEVAA-COOH	21	54	43	NH2			123_VNYANISTNNYALDEVEEVAA
P15455		CRU1_ARATH 12S seed storage protein CRA1 OS=Arabidopsis thaliana OX=3702 GN=CRA1 PE=1	24	QQGQQGQQFPNECQLDQLNALEPSHVLKSEAGR	NH2-QQGQQGQQFPNEC<Cmm*>QLDQLNALEPSHVLK<But4C13>SEAGR-COOH	33	64	43	NH2			24_QQGQQGQQFPNECQLDQLNALEPSHVLKSEAGR
P15455		CRU1_ARATH 12S seed storage protein CRA1 OS=Arabidopsis thaliana OX=3702 GN=CRA1 PE=1	25	QGQQGQQFPNECQLDQLNALEPSHVLKSEAGR	NH2-QGQQGQQFPNEC<Cmm*>QLDQLNALEPSHVLK<But4C13>SEAGR-COOH	32	91	43	NH2			25_QGQQGQQFPNECQLDQLNALEPSHVLKSEAGR
Q9LEU5		Q9LEU5_ARATH Tudor/PWWP/MBT superfamily protein OS=Arabidopsis thaliana OX=3702 GN=At5g10950 PE=1	367	KKMKGKKEEEEEEGEENA	NH2-K<But4C13>K<But4C13>M<Mox*>K<But4C13>GK<But4C13>K<But4C13>EEEEEEGEENA-COOH	18	54	45	NH2			367_KKMKGKKEEEEEEGEENA
P15455		CRU1_ARATH 12S seed storage protein CRA1 OS=Arabidopsis thaliana OX=3702 GN=CRA1 PE=1	24	QQGQQGQQFPNECQLDQLNALEPSHVLKSEAGR	NH2-Q<Pyr>QGQQGQQFPNEC<Cmm*>QLDQLNALEPSHVLK<But4C13>SEAGR-COOH	33	85	43	NH2	Q<Pyr>		24_QQGQQGQQFPNECQLDQLNALEPSHVLKSEAGR
Q9ZVF2		ML329_ARATH MLP-like protein 329 OS=Arabidopsis thaliana OX=3702 GN=MLP329 PE=2	2	ATSGTYVTEVPLKGSADKHYKR	Ace-ATSGTYVTEVPLK<But4C13>GSADK<But4C13>HYK<But4C13>R-COOH	22	74	45	Ace		Ace	2_ATSGTYVTEVPLKGSADKHYKR
A0A1P8BFG5	Q9FK35 (2-25)	A0A1P8BFG5_ARATH Adenylate kinase family protein OS=Arabidopsis thaliana OX=3702 GN=MXI22.8 PE=1	2	ATSSAASVDMEDIQTVDLMSELLR	Ace-ATSSAASVDM<Mox*>EDIQTVDLM<Mox*>SELLR-COOH	24	46	42	Ace		Ace	2_ATSSAASVDMEDIQTVDLMSELLR
Q9SD78		Q9SD78_ARATH Furry OS=Arabidopsis thaliana OX=3702 GN=F13G24.260 PE=2	2	AKSVSTAASSLVQNLR	Ace-AK<But4C13>SVSTAASSLVQNLR-COOH	16	77	44	Ace		Ace	2_AKSVSTAASSLVQNLR
P15455		CRU1_ARATH 12S seed storage protein CRA1 OS=Arabidopsis thaliana OX=3702 GN=CRA1 PE=1	190	PFYLAGNNPQGQVWLQ	NH2-PFYLAGNNPQGQVWLQ-COOH	16	73	45	NH2			190_PFYLAGNNPQGQVWLQ
A0A1P8BFG5	Q9FK35 (2-25)	A0A1P8BFG5_ARATH Adenylate kinase family protein OS=Arabidopsis thaliana OX=3702 GN=MXI22.8 PE=1	2	ATSSAASVDMEDIQTVDLMSELLR	Ace-ATSSAASVDM<Mox*>EDIQTVDLM<Mox*>SELLR-COOH	24	75	43	Ace		Ace	2_ATSSAASVDMEDIQTVDLMSELLR
P15456		CRU2_ARATH 12S seed storage protein CRB OS=Arabidopsis thaliana OX=3702 GN=CRB PE=1	161	PLILVAAADLASNQNQLDR	NH2-PLILVAAADLASNQNQLDR-COOH	19	79	45	NH2			161_PLILVAAADLASNQNQLDR
P34790		CP18C_ARATH Peptidyl-prolyl cis-trans isomerase CYP18-3 OS=Arabidopsis thaliana OX=3702 GN=CYP18-3 PE=1	81	GGESIYGSKFEDENFER	But-GGESIYGSK<But>FEDENFER-COOH	17	60	41	But			81_GGESIYGSKFEDENFER	But
Q9SIN3		Q9SIN3_ARATH Late embryogenesis abundant domain-containing protein / LEA domain-containing protein OS=Arabidopsis thaliana OX=3702 GN=At2g42560 PE=4	545	GSEKDVFGYGPKGTVEEAR	NH2-GSEK<But4C13>DVFGYGPK<But4C13>GTVEEAR-COOH	19	48	45	NH2			545_GSEKDVFGYGPKGTVEEAR
F4I4Q9	Q9C8R4 (2-13)	F4I4Q9_ARATH SGS domain-containing protein OS=Arabidopsis thaliana OX=3702 GN=At1g30070 PE=1	2	AEEVGLDLEELR	Ace-AEEVGLDLEELR-COOH	12	87	45	Ace		Ace	2_AEEVGLDLEELR
A0A1P8BFG5	Q9FK35 (2-25)	A0A1P8BFG5_ARATH Adenylate kinase family protein OS=Arabidopsis thaliana OX=3702 GN=MXI22.8 PE=1	2	ATSSAASVDMEDIQTVDLMSELLR	Ace-ATSSAASVDM<Mox*>EDIQTVDLM<Mox*>SELLR-COOH	24	107	42	Ace		Ace	2_ATSSAASVDMEDIQTVDLMSELLR
F4JLA9	Q96318 (496-508)	F4JLA9_ARATH Cruciferin 3 OS=Arabidopsis thaliana OX=3702 GN=CRU3 PE=1	425	KIKFNTLETTLTR	NH2-K<But>IK<But>FNTLETTLTR-COOH	13	67	42	NH2			425_KIKFNTLETTLTR
Q9FFE0		RRAA2_ARATH Putative 4-hydroxy-4-methyl-2-oxoglutarate aldolase 2 OS=Arabidopsis thaliana OX=3702 GN=At5g16450 PE=1	2	AFVTTAEVCDANQELIR	Ace-AFVTTAEVC<Cmm*>DANQELIR-COOH	17	54	44	Ace		Ace	2_AFVTTAEVCDANQELIR
Q9SUB2		Q9SUB2_ARATH Late embryogenesis abundant protein (LEA) family protein OS=Arabidopsis thaliana OX=3702 GN=At4g21020 PE=2	121	AKEKAKDYAER	But-AK<But>EK<But>AK<But>DYAER-COOH	11	66	46	But			121_AKEKAKDYAER	But
F4I4Q9	Q9C8R4 (2-13)	F4I4Q9_ARATH SGS domain-containing protein OS=Arabidopsis thaliana OX=3702 GN=At1g30070 PE=1	2	AEEVGLDLEELR	Ace-AEEVGLDLEELR-COOH	12	80	45	Ace		Ace	2_AEEVGLDLEELR
F4JLA9	Q96318 (496-508)	F4JLA9_ARATH Cruciferin 3 OS=Arabidopsis thaliana OX=3702 GN=CRU3 PE=1	425	KIKFNTLETTLTR	NH2-K<But4C13>IK<But4C13>FNTLETTLTR-COOH	13	81	41	NH2			425_KIKFNTLETTLTR
Q9LUQ6		RL192_ARATH 60S ribosomal protein L19-2 OS=Arabidopsis thaliana OX=3702 GN=RPL19B PE=2	2	VSLKIQKR	Ace-VSLK<But4C13>IQK<But4C13>R-COOH	8	42	36	Ace		Ace	2_VSLKIQKR
Q9LUQ6		RL192_ARATH 60S ribosomal protein L19-2 OS=Arabidopsis thaliana OX=3702 GN=RPL19B PE=2	2	VSLKIQKR	Ace-VSLK<But>IQK<But>R-COOH	8	49	40	Ace		Ace	2_VSLKIQKR
Q8H0Y9		Q8H0Y9_ARATH Acyl-CoA N-acyltransferases (NAT) superfamily protein OS=Arabidopsis thaliana OX=3702 GN=At1g21770 PE=2	2	ATGTATEKPKIVWNEGR	Ace-ATGTATEK<But4C13>PK<But4C13>IVWNEGR-COOH	17	75	45	Ace		Ace	2_ATGTATEKPKIVWNEGR
Q8H0Y9		Q8H0Y9_ARATH Acyl-CoA N-acyltransferases (NAT) superfamily protein OS=Arabidopsis thaliana OX=3702 GN=At1g21770 PE=2	2	ATGTATEKPKIVWNEGR	Ace-ATGTATEK<But>PK<But>IVWNEGR-COOH	17	96	45	Ace		Ace	2_ATGTATEKPKIVWNEGR
Q8H0Y9		Q8H0Y9_ARATH Acyl-CoA N-acyltransferases (NAT) superfamily protein OS=Arabidopsis thaliana OX=3702 GN=At1g21770 PE=2	2	ATGTATEKPKIVWNEGR	Ace-ATGTATEK<But4C13>PK<But4C13>IVWNEGR-COOH	17	63	45	Ace		Ace	2_ATGTATEKPKIVWNEGR
Q8W455		Q8W455_ARATH Expressed protein OS=Arabidopsis thaliana OX=3702 GN=At2g36835 PE=2	2	AKKGGATLAEDAPWR	Ace-AK<But4C13>K<But4C13>GGATLAEDAPWR-COOH	15	110	45	Ace		Ace	2_AKKGGATLAEDAPWR
F4I4Q9	Q9C8R4 (212-222)	F4I4Q9_ARATH SGS domain-containing protein OS=Arabidopsis thaliana OX=3702 GN=At1g30070 PE=1	219	SGKAADPLKGL	NH2-SGK<But4C13>AADPLK<But4C13>GL-COOH	11	43	42	NH2			219_SGKAADPLKGL
Q8W455		Q8W455_ARATH Expressed protein OS=Arabidopsis thaliana OX=3702 GN=At2g36835 PE=2	2	AKKGGATLAEDAPWR	Ace-AK<But>K<But>GGATLAEDAPWR-COOH	15	90	45	Ace		Ace	2_AKKGGATLAEDAPWR
Q9SLA8		FABI_ARATH Enoyl-[acyl-carrier-protein] reductase [NADH], chloroplastic OS=Arabidopsis thaliana OX=3702 GN=MOD1 PE=1	216	GPEVSKPLLETSR	But-GPEVSK<But>PLLETSR-COOH	13	55	45	But			216_GPEVSKPLLETSR	But
P15456		CRU2_ARATH 12S seed storage protein CRB OS=Arabidopsis thaliana OX=3702 GN=CRB PE=1	305	SYNLPILR	But-SYNLPILR-COOH	8	53	44	But			305_SYNLPILR	But
A0A1P8BFG5	Q9FK35 (2-25)	A0A1P8BFG5_ARATH Adenylate kinase family protein OS=Arabidopsis thaliana OX=3702 GN=MXI22.8 PE=1	2	ATSSAASVDMEDIQTVDLMSELLR	Ace-ATSSAASVDM<Mox*>EDIQTVDLM<Mox*>SELLR-COOH	24	70	43	Ace		Ace	2_ATSSAASVDMEDIQTVDLMSELLR
P15456		CRU2_ARATH 12S seed storage protein CRB OS=Arabidopsis thaliana OX=3702 GN=CRB PE=1	305	SYNLPILR	But4C13-SYNLPILR-COOH	8	47	43	But4C13			305_SYNLPILR	But
Q43291		RL211_ARATH 60S ribosomal protein L21-1 OS=Arabidopsis thaliana OX=3702 GN=RPL21A PE=2	109	KKKNDELKAAAKAN	NH2-K<But>K<But>K<But>NDELK<But>AAAK<But>AN-COOH	14	53	42	NH2			109_KKKNDELKAAAKAN
P15455		CRU1_ARATH 12S seed storage protein CRA1 OS=Arabidopsis thaliana OX=3702 GN=CRA1 PE=1	25	QGQQGQQFPNECQLDQLNALEPSHVLKSEAGR	NH2-Q<Pyr>GQQGQQFPNEC<Cmm*>QLDQLNALEPSHVLK<But4C13>SEAGR-COOH	32	66	43	NH2	Q<Pyr>		25_QGQQGQQFPNECQLDQLNALEPSHVLKSEAGR
Q945M1		NDUB9_ARATH NADH dehydrogenase [ubiquinone] 1 beta subcomplex subunit 9 OS=Arabidopsis thaliana OX=3702 GN=CIB22 PE=1	98	NPTPPAGIEIVYNYGLEDNP	NH2-NPTPPAGIEIVYNYGLEDNP-COOH	20	49	44	NH2			98_NPTPPAGIEIVYNYGLEDNP
Q9SIN3		Q9SIN3_ARATH Late embryogenesis abundant domain-containing protein / LEA domain-containing protein OS=Arabidopsis thaliana OX=3702 GN=At2g42560 PE=4	290	AVEAKETAAEKAQR	But4C13-AVEAK<But4C13>ETAAEK<But4C13>AQR-COOH	14	69	44	But4C13			290_AVEAKETAAEKAQR	But
Q9FLH8		SCRK7_ARATH Probable fructokinase-7 OS=Arabidopsis thaliana OX=3702 GN=At5g51830 PE=1	2	GEDAISGNLKNLTIDTR	Ace-GEDAISGNLK<But4C13>NLTIDTR-COOH	17	84	46	Ace		Ace	2_GEDAISGNLKNLTIDTR
O64725	Q9M9R9 (2-13)	NDB3A_ARATH NADH dehydrogenase [ubiquinone] 1 beta subcomplex subunit 3-A OS=Arabidopsis thaliana OX=3702 GN=At2g02510 PE=3	2	AKPLGTTGEFFR	Ace-AK<But4C13>PLGTTGEFFR-COOH	12	50	45	Ace		Ace	2_AKPLGTTGEFFR
P15456		CRU2_ARATH 12S seed storage protein CRB OS=Arabidopsis thaliana OX=3702 GN=CRB PE=1	37	ALEPSQIIKSEGGR	But-ALEPSQIIK<But>SEGGR-COOH	14	68	45	But			37_ALEPSQIIKSEGGR	But
O80934		Y2766_ARATH Uncharacterized protein At2g37660, chloroplastic OS=Arabidopsis thaliana OX=3702 GN=At2g37660 PE=1	70	AAATTEPLTVLVTGAGGR	NH2-AAATTEPLTVLVTGAGGR-COOH	18	75	45	NH2			70_AAATTEPLTVLVTGAGGR
P15456		CRU2_ARATH 12S seed storage protein CRB OS=Arabidopsis thaliana OX=3702 GN=CRB PE=1	37	ALEPSQIIKSEGGR	But4C13-ALEPSQIIK<But4C13>SEGGR-COOH	14	81	44	But4C13			37_ALEPSQIIKSEGGR	But
Q9SUB2		Q9SUB2_ARATH Late embryogenesis abundant protein (LEA) family protein OS=Arabidopsis thaliana OX=3702 GN=At4g21020 PE=2	122	KEKAKDYAER	But4C13-K<But4C13>EK<But4C13>AK<But4C13>DYAER-COOH	10	57	44	But4C13			122_KEKAKDYAER	But
Q9SUB2		Q9SUB2_ARATH Late embryogenesis abundant protein (LEA) family protein OS=Arabidopsis thaliana OX=3702 GN=At4g21020 PE=2	253	AEKDQKEDDFITFN	NH2-AEK<But4C13>DQK<But4C13>EDDFITFN-COOH	14	47	45	NH2			253_AEKDQKEDDFITFN
Q8VY07		EPN1_ARATH Clathrin interactor EPSIN 1 OS=Arabidopsis thaliana OX=3702 GN=EPSIN1 PE=1	1	MDFMKVFDQTVR	Ace-M<Mox*>DFM<Mox*>K<But4C13>VFDQTVR-COOH	12	61	44	Ace		Ace	1_MDFMKVFDQTVR
F4HXW5	Q39133 (2-19)	F4HXW5_ARATH Polyketide cyclase/dehydrase and lipid transport superfamily protein OS=Arabidopsis thaliana OX=3702 GN=At1g14940 PE=4	2	AMSGTYVAEVPLKGSAEK	Ace-AM<Mox*>SGTYVAEVPLK<But>GSAEK<But>-COOH	18	63	46	Ace		Ace	2_AMSGTYVAEVPLKGSAEK
P15458		2SS2_ARATH 2S seed storage protein 2 OS=Arabidopsis thaliana OX=3702 GN=AT2S2 PE=2	138	KIYKTAKYLPN	NH2-K<But4C13>IYK<But4C13>TAK<But4C13>YLPN-COOH	11	42	40	NH2			138_KIYKTAKYLPN
P15456		CRU2_ARATH 12S seed storage protein CRB OS=Arabidopsis thaliana OX=3702 GN=CRB PE=1	37	ALEPSQIIKSEGGR	But-ALEPSQIIK<But>SEGGR-COOH	14	62	45	But			37_ALEPSQIIKSEGGR	But
Q8VY07		EPN1_ARATH Clathrin interactor EPSIN 1 OS=Arabidopsis thaliana OX=3702 GN=EPSIN1 PE=1	1	MDFMKVFDQTVR	Ace-M<Mox*>DFM<Mox*>K<But4C13>VFDQTVR-COOH	12	60	44	Ace		Ace	1_MDFMKVFDQTVR
Q9SUB2		Q9SUB2_ARATH Late embryogenesis abundant protein (LEA) family protein OS=Arabidopsis thaliana OX=3702 GN=At4g21020 PE=2	253	AEKDQKEDDFITFN	NH2-AEK<But4C13>DQK<But4C13>EDDFITFN-COOH	14	47	45	NH2			253_AEKDQKEDDFITFN
B9DH97	P47192 (2-13)^AQ9ZTW3 (2-13)	B9DH97_ARATH AT2G33120 protein OS=Arabidopsis thaliana OX=3702 GN=SAR1 PE=2	2	AQQSLIYSFVAR	Ace-AQQSLIYSFVAR-COOH	12	74	45	Ace		Ace	2_AQQSLIYSFVAR
P15456		CRU2_ARATH 12S seed storage protein CRB OS=Arabidopsis thaliana OX=3702 GN=CRB PE=1	37	ALEPSQIIKSEGGR	But-ALEPSQIIK<But>SEGGR-COOH	14	66	45	But			37_ALEPSQIIKSEGGR	But
P15456		CRU2_ARATH 12S seed storage protein CRB OS=Arabidopsis thaliana OX=3702 GN=CRB PE=1	37	ALEPSQIIKSEGGR	But4C13-ALEPSQIIK<But4C13>SEGGR-COOH	14	76	44	But4C13			37_ALEPSQIIKSEGGR	But
Q8LAS8		SFGH_ARATH S-formylglutathione hydrolase OS=Arabidopsis thaliana OX=3702 GN=SFGH PE=1	2	ASGLSEIGSTKMFDGYNKR	Ace-ASGLSEIGSTK<But4C13>M<Mox*>FDGYNK<But4C13>R-COOH	19	81	45	Ace		Ace	2_ASGLSEIGSTKMFDGYNKR
Q9LF88		Y3304_ARATH Late embryogenesis abundant protein At3g53040 OS=Arabidopsis thaliana OX=3702 GN=At3g53040 PE=2	122	EAKDKTADKTKETADYAAEKAR	NH2-EAK<But4C13>DK<But4C13>TADK<But4C13>TK<But4C13>ETADYAAEK<But4C13>AR-COOH	22	76	45	NH2			122_EAKDKTADKTKETADYAAEKAR
Q8LAS8		SFGH_ARATH S-formylglutathione hydrolase OS=Arabidopsis thaliana OX=3702 GN=SFGH PE=1	2	ASGLSEIGSTKMFDGYNKR	Ace-ASGLSEIGSTK<But>M<Mox*>FDGYNK<But>R-COOH	19	62	45	Ace		Ace	2_ASGLSEIGSTKMFDGYNKR
Q8LAS8		SFGH_ARATH S-formylglutathione hydrolase OS=Arabidopsis thaliana OX=3702 GN=SFGH PE=1	2	ASGLSEIGSTKMFDGYNKR	Ace-ASGLSEIGSTK<But>M<Mox*>FDGYNK<But>R-COOH	19	82	44	Ace		Ace	2_ASGLSEIGSTKMFDGYNKR
Q8LAS8		SFGH_ARATH S-formylglutathione hydrolase OS=Arabidopsis thaliana OX=3702 GN=SFGH PE=1	2	ASGLSEIGSTKMFDGYNKR	Ace-ASGLSEIGSTK<But4C13>M<Mox*>FDGYNK<But4C13>R-COOH	19	82	45	Ace		Ace	2_ASGLSEIGSTKMFDGYNKR
Q8LAS8		SFGH_ARATH S-formylglutathione hydrolase OS=Arabidopsis thaliana OX=3702 GN=SFGH PE=1	2	ASGLSEIGSTKMFDGYNKR	Ace-ASGLSEIGSTK<But4C13>M<Mox*>FDGYNK<But4C13>R-COOH	19	59	45	Ace		Ace	2_ASGLSEIGSTKMFDGYNKR
P15455	F4K8S2 (186-203)	CRU1_ARATH 12S seed storage protein CRA1 OS=Arabidopsis thaliana OX=3702 GN=CRA1 PE=1	373	VFDGQVSQGQLIAVPQGF	NH2-VFDGQVSQGQLIAVPQGF-COOH	18	48	46	NH2			373_VFDGQVSQGQLIAVPQGF
Q8LAS8		SFGH_ARATH S-formylglutathione hydrolase OS=Arabidopsis thaliana OX=3702 GN=SFGH PE=1	2	ASGLSEIGSTKMFDGYNKR	Ace-ASGLSEIGSTK<But>M<Mox*>FDGYNK<But>R-COOH	19	78	45	Ace		Ace	2_ASGLSEIGSTKMFDGYNKR
Q9LF88		Y3304_ARATH Late embryogenesis abundant protein At3g53040 OS=Arabidopsis thaliana OX=3702 GN=At3g53040 PE=2	122	EAKDKTADKTKETADYAAEKAR	NH2-EAK<But4C13>DK<But4C13>TADK<But4C13>TK<But4C13>ETADYAAEK<But4C13>AR-COOH	22	81	45	NH2			122_EAKDKTADKTKETADYAAEKAR
P15459		2SS3_ARATH 2S seed storage protein 3 OS=Arabidopsis thaliana OX=3702 GN=AT2S3 PE=1	131	KIYQSAKYLPNIC	NH2-K<But>IYQSAK<But>YLPNIC<Cmm*>-COOH	13	47	45	NH2			131_KIYQSAKYLPNIC
P15455		CRU1_ARATH 12S seed storage protein CRA1 OS=Arabidopsis thaliana OX=3702 GN=CRA1 PE=1	24	QQGQQGQQFPNECQLDQLNALEPSHVLKSEAGR	NH2-QQGQQGQQFPNEC<Cmm*>QLDQLNALEPSHVLK<But4C13>SEAGR-COOH	33	59	43	NH2			24_QQGQQGQQFPNECQLDQLNALEPSHVLKSEAGR
Q3E8H9	Q9FKV7 (104-121)	Q3E8H9_ARATH Late embryogenesis abundant protein (LEA) family protein OS=Arabidopsis thaliana OX=3702 GN=At5g44310 PE=4	68	TKDYAEQTKNKVNEGASR	But-TK<But>DYAEQTK<But>NK<But>VNEGASR-COOH	18	82	45	But			68_TKDYAEQTKNKVNEGASR	But
Q3E8H9	Q9FKV7 (104-121)	Q3E8H9_ARATH Late embryogenesis abundant protein (LEA) family protein OS=Arabidopsis thaliana OX=3702 GN=At5g44310 PE=4	68	TKDYAEQTKNKVNEGASR	But-TK<But>DYAEQTK<But>NK<But>VNEGASR-COOH	18	108	45	But			68_TKDYAEQTKNKVNEGASR	But
Q3E8H9	Q9FKV7 (104-121)	Q3E8H9_ARATH Late embryogenesis abundant protein (LEA) family protein OS=Arabidopsis thaliana OX=3702 GN=At5g44310 PE=4	68	TKDYAEQTKNKVNEGASR	But4C13-TK<But4C13>DYAEQTK<But4C13>NK<But4C13>VNEGASR-COOH	18	112	45	But4C13			68_TKDYAEQTKNKVNEGASR	But
Q9SUB2		Q9SUB2_ARATH Late embryogenesis abundant protein (LEA) family protein OS=Arabidopsis thaliana OX=3702 GN=At4g21020 PE=2	253	AEKDQKEDDFITFN	NH2-AEK<But4C13>DQK<But4C13>EDDFITFN-COOH	14	62	45	NH2			253_AEKDQKEDDFITFN
B9DH97	P47192 (2-13)^AQ9ZTW3 (2-13)	B9DH97_ARATH AT2G33120 protein OS=Arabidopsis thaliana OX=3702 GN=SAR1 PE=2	2	AQQSLIYSFVAR	Ace-AQQSLIYSFVAR-COOH	12	50	45	Ace		Ace	2_AQQSLIYSFVAR
Q3E8H9	Q9FKV7 (104-121)	Q3E8H9_ARATH Late embryogenesis abundant protein (LEA) family protein OS=Arabidopsis thaliana OX=3702 GN=At5g44310 PE=4	68	TKDYAEQTKNKVNEGASR	But-TK<But>DYAEQTK<But>NK<But>VNEGASR-COOH	18	67	45	But			68_TKDYAEQTKNKVNEGASR	But
P15459		2SS3_ARATH 2S seed storage protein 3 OS=Arabidopsis thaliana OX=3702 GN=AT2S3 PE=1	131	KIYQSAKYLPNIC	NH2-K<But4C13>IYQSAK<But4C13>YLPNIC<Cmm*>-COOH	13	46	45	NH2			131_KIYQSAKYLPNIC
Q9LQP1		Q9LQP1_ARATH Dessication-induced 1VOC superfamily protein OS=Arabidopsis thaliana OX=3702 GN=F24B9.26 PE=2	100	VENGAEAVSKPEDKEWGQKVGYVR	But4C13-VENGAEAVSK<But4C13>PEDK<But4C13>EWGQK<But4C13>VGYVR-COOH	24	53	45	But4C13			100_VENGAEAVSKPEDKEWGQKVGYVR	But
Q8LAS8		SFGH_ARATH S-formylglutathione hydrolase OS=Arabidopsis thaliana OX=3702 GN=SFGH PE=1	2	ASGLSEIGSTKMFDGYNKR	Ace-ASGLSEIGSTK<But>M<Mox*>FDGYNK<But>R-COOH	19	83	44	Ace		Ace	2_ASGLSEIGSTKMFDGYNKR
Q8H185		MTND4_ARATH 1,2-dihydroxy-3-keto-5-methylthiopentene dioxygenase 4 OS=Arabidopsis thaliana OX=3702 GN=ARD4 PE=1	2	ALEAWFMDDSNEDQR	Ace-ALEAWFM<Mox*>DDSNEDQR-COOH	15	50	36	Ace		Ace	2_ALEAWFMDDSNEDQR
Q39132		Q39132_ARATH At1g14950/F10B6_18 OS=Arabidopsis thaliana OX=3702 GN=MLP1 PE=2	2	ATSGTYVTEVPLKGSAKNHY	Ace-ATSGTYVTEVPLK<But4C13>GSAK<But4C13>NHY-COOH	20	66	45	Ace		Ace	2_ATSGTYVTEVPLKGSAKNHY
Q9S714		PSAE2_ARATH Photosystem I reaction center subunit IV B, chloroplastic OS=Arabidopsis thaliana OX=3702 GN=PSAE2 PE=2	126	VNYANISTNNYALDEVEEVK	NH2-VNYANISTNNYALDEVEEVK<But4C13>-COOH	20	50	45	NH2			126_VNYANISTNNYALDEVEEVK
Q39132		Q39132_ARATH At1g14950/F10B6_18 OS=Arabidopsis thaliana OX=3702 GN=MLP1 PE=2	2	ATSGTYVTEVPLKGSAKNHY	Ace-ATSGTYVTEVPLK<But>GSAK<But>NHY-COOH	20	60	45	Ace		Ace	2_ATSGTYVTEVPLKGSAKNHY
P15455	F4K8S2 (186-203)	CRU1_ARATH 12S seed storage protein CRA1 OS=Arabidopsis thaliana OX=3702 GN=CRA1 PE=1	373	VFDGQVSQGQLIAVPQGF	NH2-VFDGQVSQGQLIAVPQGF-COOH	18	57	46	NH2			373_VFDGQVSQGQLIAVPQGF
Q9LQP1		Q9LQP1_ARATH Dessication-induced 1VOC superfamily protein OS=Arabidopsis thaliana OX=3702 GN=F24B9.26 PE=2	99	AVENGAEAVSKPEDKEWGQKVGYVR	NH2-AVENGAEAVSK<But4C13>PEDK<But4C13>EWGQK<But4C13>VGYVR-COOH	25	62	45	NH2			99_AVENGAEAVSKPEDKEWGQKVGYVR
P15455	F4K8S2 (131-138)	CRU1_ARATH 12S seed storage protein CRA1 OS=Arabidopsis thaliana OX=3702 GN=CRA1 PE=1	318	SYDLPILR	But-SYDLPILR-COOH	8	46	45	But			318_SYDLPILR	But
Q39132		Q39132_ARATH At1g14950/F10B6_18 OS=Arabidopsis thaliana OX=3702 GN=MLP1 PE=2	2	ATSGTYVTEVPLKGSAKNHY	Ace-ATSGTYVTEVPLK<But4C13>GSAK<But4C13>NHY-COOH	20	83	45	Ace		Ace	2_ATSGTYVTEVPLKGSAKNHY
Q949U7		PRX2E_ARATH Peroxiredoxin-2E, chloroplastic OS=Arabidopsis thaliana OX=3702 GN=PRXIIE PE=1	160	KDLGINDEVMLLSDGN	NH2-K<But4C13>DLGINDEVM<Mox*>LLSDGN-COOH	16	55	45	NH2			160_KDLGINDEVMLLSDGN
P15455		CRU1_ARATH 12S seed storage protein CRA1 OS=Arabidopsis thaliana OX=3702 GN=CRA1 PE=1	24	QQGQQGQQFPNECQLDQLNALEPSHVLKSEAGR	NH2-QQGQQGQQFPNEC<Cmm*>QLDQLNALEPSHVLK<But4C13>SEAGR-COOH	33	69	43	NH2			24_QQGQQGQQFPNECQLDQLNALEPSHVLKSEAGR
P15459		2SS3_ARATH 2S seed storage protein 3 OS=Arabidopsis thaliana OX=3702 GN=AT2S3 PE=1	131	KIYQSAKYLPNIC	NH2-K<But4C13>IYQSAK<But4C13>YLPNIC<Cmm*>-COOH	13	58	45	NH2			131_KIYQSAKYLPNIC
Q39132		Q39132_ARATH At1g14950/F10B6_18 OS=Arabidopsis thaliana OX=3702 GN=MLP1 PE=2	2	ATSGTYVTEVPLKGSAKNHY	Ace-ATSGTYVTEVPLK<But>GSAK<But>NHY-COOH	20	65	45	Ace		Ace	2_ATSGTYVTEVPLKGSAKNHY
Q39132		Q39132_ARATH At1g14950/F10B6_18 OS=Arabidopsis thaliana OX=3702 GN=MLP1 PE=2	2	ATSGTYVTEVPLKGSAKNHY	Ace-ATSGTYVTEVPLK<But>GSAK<But>NHY-COOH	20	78	46	Ace		Ace	2_ATSGTYVTEVPLKGSAKNHY
Q9LQP1		Q9LQP1_ARATH Dessication-induced 1VOC superfamily protein OS=Arabidopsis thaliana OX=3702 GN=F24B9.26 PE=2	99	AVENGAEAVSKPEDKEWGQKVGYVR	NH2-AVENGAEAVSK<But4C13>PEDK<But4C13>EWGQK<But4C13>VGYVR-COOH	25	50	45	NH2			99_AVENGAEAVSKPEDKEWGQKVGYVR
P15455		CRU1_ARATH 12S seed storage protein CRA1 OS=Arabidopsis thaliana OX=3702 GN=CRA1 PE=1	24	QQGQQGQQFPNECQLDQLNALEPSHVLKSEAGR	NH2-QQGQQGQQFPNEC<Cmm*>QLDQLNALEPSHVLK<But>SEAGR-COOH	33	79	43	NH2			24_QQGQQGQQFPNECQLDQLNALEPSHVLKSEAGR
Q39132		Q39132_ARATH At1g14950/F10B6_18 OS=Arabidopsis thaliana OX=3702 GN=MLP1 PE=2	2	ATSGTYVTEVPLKGSAKNHY	Ace-ATSGTYVTEVPLK<But4C13>GSAK<But4C13>NHY-COOH	20	70	45	Ace		Ace	2_ATSGTYVTEVPLKGSAKNHY
P15455	F4K8S2 (186-203)	CRU1_ARATH 12S seed storage protein CRA1 OS=Arabidopsis thaliana OX=3702 GN=CRA1 PE=1	373	VFDGQVSQGQLIAVPQGF	NH2-VFDGQVSQGQLIAVPQGF-COOH	18	56	46	NH2			373_VFDGQVSQGQLIAVPQGF
Q39132		Q39132_ARATH At1g14950/F10B6_18 OS=Arabidopsis thaliana OX=3702 GN=MLP1 PE=2	2	ATSGTYVTEVPLKGSAKNHY	Ace-ATSGTYVTEVPLK<But4C13>GSAK<But4C13>NHY-COOH	20	73	45	Ace		Ace	2_ATSGTYVTEVPLKGSAKNHY
Q39132		Q39132_ARATH At1g14950/F10B6_18 OS=Arabidopsis thaliana OX=3702 GN=MLP1 PE=2	2	ATSGTYVTEVPLKGSAKNHY	Ace-ATSGTYVTEVPLK<But>GSAK<But>NHY-COOH	20	67	45	Ace		Ace	2_ATSGTYVTEVPLKGSAKNHY
P34790		CP18C_ARATH Peptidyl-prolyl cis-trans isomerase CYP18-3 OS=Arabidopsis thaliana OX=3702 GN=CYP18-3 PE=1	82	GESIYGSKFEDENFER	But-GESIYGSK<But>FEDENFER-COOH	16	94	41	But			82_GESIYGSKFEDENFER	But
A0A2H1ZE65	Q9FK91 (212-233)	A0A2H1ZE65_ARATH Poly [ADP-ribose] polymerase OS=Arabidopsis thaliana OX=3702 GN=MQJ16.1 PE=4	213	NGGKVSNTVQGVTCLVVSPAER	NH2-NGGK<But4C13>VSNTVQGVTC<Cmm*>LVVSPAER-COOH	22	111	45	NH2			213_NGGKVSNTVQGVTCLVVSPAER
Q9SIN3		Q9SIN3_ARATH Late embryogenesis abundant domain-containing protein / LEA domain-containing protein OS=Arabidopsis thaliana OX=3702 GN=At2g42560 PE=4	51	GGTQFVSLSDKGSNMPVSDEGEGETKMKR	But4C13-GGTQFVSLSDK<But4C13>GSNM<Mox*>PVSDEGEGETK<But4C13>M<Mox*>K<But4C13>R-COOH	29	63	44	But4C13			51_GGTQFVSLSDKGSNMPVSDEGEGETKMKR	But
A0A2H1ZE65	Q9FK91 (212-233)	A0A2H1ZE65_ARATH Poly [ADP-ribose] polymerase OS=Arabidopsis thaliana OX=3702 GN=MQJ16.1 PE=4	213	NGGKVSNTVQGVTCLVVSPAER	NH2-NGGK<But>VSNTVQGVTC<Cmm*>LVVSPAER-COOH	22	116	46	NH2			213_NGGKVSNTVQGVTCLVVSPAER
P34790		CP18C_ARATH Peptidyl-prolyl cis-trans isomerase CYP18-3 OS=Arabidopsis thaliana OX=3702 GN=CYP18-3 PE=1	82	GESIYGSKFEDENFER	But4C13-GESIYGSK<But4C13>FEDENFER-COOH	16	117	43	But4C13			82_GESIYGSKFEDENFER	But
P15455		CRU1_ARATH 12S seed storage protein CRA1 OS=Arabidopsis thaliana OX=3702 GN=CRA1 PE=1	24	QQGQQGQQFPNECQLDQLNALEPSHVLKSEAGR	NH2-Q<Pyr>QGQQGQQFPNEC<Cmm*>QLDQLNALEPSHVLK<But4C13>SEAGR-COOH	33	69	43	NH2	Q<Pyr>		24_QQGQQGQQFPNECQLDQLNALEPSHVLKSEAGR
Q9LF88		Y3304_ARATH Late embryogenesis abundant protein At3g53040 OS=Arabidopsis thaliana OX=3702 GN=At3g53040 PE=2	149	TADKTKETAEYTAEKAR	But4C13-TADK<But4C13>TK<But4C13>ETAEYTAEK<But4C13>AR-COOH	17	71	45	But4C13			149_TADKTKETAEYTAEKAR	But
A0A2H1ZE65	Q9FK91 (212-233)	A0A2H1ZE65_ARATH Poly [ADP-ribose] polymerase OS=Arabidopsis thaliana OX=3702 GN=MQJ16.1 PE=4	213	NGGKVSNTVQGVTCLVVSPAER	NH2-NGGK<But4C13>VSNTVQGVTC<Cmm*>LVVSPAER-COOH	22	98	45	NH2			213_NGGKVSNTVQGVTCLVVSPAER
Q9LF88		Y3304_ARATH Late embryogenesis abundant protein At3g53040 OS=Arabidopsis thaliana OX=3702 GN=At3g53040 PE=2	149	TADKTKETAEYTAEKAR	But4C13-TADK<But4C13>TK<But4C13>ETAEYTAEK<But4C13>AR-COOH	17	86	45	But4C13			149_TADKTKETAEYTAEKAR	But
Q39132		Q39132_ARATH At1g14950/F10B6_18 OS=Arabidopsis thaliana OX=3702 GN=MLP1 PE=2	2	ATSGTYVTEVPLKGSAKNHY	Ace-ATSGTYVTEVPLK<But4C13>GSAK<But4C13>NHY-COOH	20	71	45	Ace		Ace	2_ATSGTYVTEVPLKGSAKNHY
P15455		CRU1_ARATH 12S seed storage protein CRA1 OS=Arabidopsis thaliana OX=3702 GN=CRA1 PE=1	24	QQGQQGQQFPNECQLDQLNALEPSHVLKSEAGR	NH2-Q<Pyr>QGQQGQQFPNEC<Cmm*>QLDQLNALEPSHVLK<But4C13>SEAGR-COOH	33	82	43	NH2	Q<Pyr>		24_QQGQQGQQFPNECQLDQLNALEPSHVLKSEAGR
Q9LF88		Y3304_ARATH Late embryogenesis abundant protein At3g53040 OS=Arabidopsis thaliana OX=3702 GN=At3g53040 PE=2	149	TADKTKETAEYTAEKAR	But4C13-TADK<But4C13>TK<But4C13>ETAEYTAEK<But4C13>AR-COOH	17	101	45	But4C13			149_TADKTKETAEYTAEKAR	But
Q9LF88		Y3304_ARATH Late embryogenesis abundant protein At3g53040 OS=Arabidopsis thaliana OX=3702 GN=At3g53040 PE=2	149	TADKTKETAEYTAEKAR	But4C13-TADK<But4C13>TK<But4C13>ETAEYTAEK<But4C13>AR-COOH	17	79	45	But4C13			149_TADKTKETAEYTAEKAR	But
Q9LF88		Y3304_ARATH Late embryogenesis abundant protein At3g53040 OS=Arabidopsis thaliana OX=3702 GN=At3g53040 PE=2	149	TADKTKETAEYTAEKAR	But-TADK<But>TK<But>ETAEYTAEK<But>AR-COOH	17	84	45	But			149_TADKTKETAEYTAEKAR	But
P15455		CRU1_ARATH 12S seed storage protein CRA1 OS=Arabidopsis thaliana OX=3702 GN=CRA1 PE=1	24	QQGQQGQQFPNECQLDQLNALEPSHVLKSEAGR	NH2-QQGQQGQQFPNEC<Cmm*>QLDQLNALEPSHVLK<But>SEAGR-COOH	33	88	43	NH2			24_QQGQQGQQFPNECQLDQLNALEPSHVLKSEAGR
Q03251	F4JVB9 (8-24)^AF4JVC0 (8-24)^AF4JVC1 (8-24)	RBG8_ARATH Glycine-rich RNA-binding protein 8 OS=Arabidopsis thaliana OX=3702 GN=RBG8 PE=1	8	CFVGGLAWATNDEDLQR	NH2-C<Cmm*>FVGGLAWATNDEDLQR-COOH	17	100	42	NH2			8_CFVGGLAWATNDEDLQR
P15455		CRU1_ARATH 12S seed storage protein CRA1 OS=Arabidopsis thaliana OX=3702 GN=CRA1 PE=1	25	QGQQGQQFPNECQLDQLNALEPSHVLKSEAGR	NH2-QGQQGQQFPNEC<Cmm*>QLDQLNALEPSHVLK<But>SEAGR-COOH	32	70	43	NH2			25_QGQQGQQFPNECQLDQLNALEPSHVLKSEAGR
Q9ZVF2		ML329_ARATH MLP-like protein 329 OS=Arabidopsis thaliana OX=3702 GN=MLP329 PE=2	2	ATSGTYVTEVPLKGSADKHY	Ace-ATSGTYVTEVPLK<But4C13>GSADK<But4C13>HY-COOH	20	63	46	Ace		Ace	2_ATSGTYVTEVPLKGSADKHY
P19036		HSP17_ARATH 17.4 kDa class I heat shock protein OS=Arabidopsis thaliana OX=3702 GN=HSP17.4A PE=1	2	SLVPSFFGGR	Ace-SLVPSFFGGR-COOH	10	58	45	Ace		Ace	2_SLVPSFFGGR
P15455		CRU1_ARATH 12S seed storage protein CRA1 OS=Arabidopsis thaliana OX=3702 GN=CRA1 PE=1	24	QQGQQGQQFPNECQLDQLNALEPSHVLKSEAGR	NH2-QQGQQGQQFPNEC<Cmm*>QLDQLNALEPSHVLK<But4C13>SEAGR-COOH	33	75	43	NH2			24_QQGQQGQQFPNECQLDQLNALEPSHVLKSEAGR
P15455		CRU1_ARATH 12S seed storage protein CRA1 OS=Arabidopsis thaliana OX=3702 GN=CRA1 PE=1	24	QQGQQGQQFPNECQLDQLNALEPSHVLKSEAGR	NH2-Q<Pyr>QGQQGQQFPNEC<Cmm*>QLDQLNALEPSHVLK<But4C13>SEAGR-COOH	33	91	43	NH2	Q<Pyr>		24_QQGQQGQQFPNECQLDQLNALEPSHVLKSEAGR
Q96520		PER12_ARATH Peroxidase 12 OS=Arabidopsis thaliana OX=3702 GN=PER12 PE=1	134	CGQVVSCSDILALAAR	NH2-C<Cmm*>GQVVSC<Cmm*>SDILALAAR-COOH	16	97	45	NH2			134_CGQVVSCSDILALAAR
Q9FXA2		PABP8_ARATH Polyadenylate-binding protein 8 OS=Arabidopsis thaliana OX=3702 GN=PAB8 PE=1	647	SVAQQQAGGAADQLASLSLGDNIVP	NH2-SVAQQQAGGAADQLASLSLGDNIVP-COOH	25	62	45	NH2			647_SVAQQQAGGAADQLASLSLGDNIVP
Q9FXA2		PABP8_ARATH Polyadenylate-binding protein 8 OS=Arabidopsis thaliana OX=3702 GN=PAB8 PE=1	647	SVAQQQAGGAADQLASLSLGDNIVP	NH2-SVAQQQAGGAADQLASLSLGDNIVP-COOH	25	60	45	NH2			647_SVAQQQAGGAADQLASLSLGDNIVP
Q949U7		PRX2E_ARATH Peroxiredoxin-2E, chloroplastic OS=Arabidopsis thaliana OX=3702 GN=PRXIIE PE=1	160	KDLGINDEVMLLSD	NH2-K<But4C13>DLGINDEVM<Mox*>LLSD-COOH	14	74	46	NH2			160_KDLGINDEVMLLSD
Q949U7		PRX2E_ARATH Peroxiredoxin-2E, chloroplastic OS=Arabidopsis thaliana OX=3702 GN=PRXIIE PE=1	160	KDLGINDEVMLLSD	NH2-K<But4C13>DLGINDEVM<Mox*>LLSD-COOH	14	70	46	NH2			160_KDLGINDEVMLLSD
Q2HIW6		Q2HIW6_ARATH At5g51840 OS=Arabidopsis thaliana OX=3702 GN=MIO24.2 PE=2	1	MMASDPKLKAEIGADGLAR	Ace-M<Mox*>M<Mox*>ASDPK<But4C13>LK<But4C13>AEIGADGLAR-COOH	19	82	45	Ace		Ace	1_MMASDPKLKAEIGADGLAR
A0A1P8AU36	Q9FZ42 (89-110)	A0A1P8AU36_ARATH NAD(P)-binding Rossmann-fold superfamily protein OS=Arabidopsis thaliana OX=3702 GN=At1g54870 PE=4	138	TSDSKEPIAIPTDLGFDENCKR	NH2-TSDSK<But4C13>EPIAIPTDLGFDENC<Cmm*>K<But4C13>R-COOH	22	68	45	NH2			138_TSDSKEPIAIPTDLGFDENCKR
P42763		ERD14_ARATH Dehydrin ERD14 OS=Arabidopsis thaliana OX=3702 GN=ERD14 PE=1	2	AEEIKNVPEQEVPKVATEESSAEVTDR	Ace-AEEIK<But4C13>NVPEQEVPK<But4C13>VATEESSAEVTDR-COOH	27	90	45	Ace		Ace	2_AEEIKNVPEQEVPKVATEESSAEVTDR
Q9SJ44		UEV1C_ARATH Ubiquitin-conjugating enzyme E2 variant 1C OS=Arabidopsis thaliana OX=3702 GN=UEV1C PE=1	135	KLVQPPEGTFF	NH2-K<But>LVQPPEGTFF-COOH	11	52	45	NH2			135_KLVQPPEGTFF
Q96520		PER12_ARATH Peroxidase 12 OS=Arabidopsis thaliana OX=3702 GN=PER12 PE=1	134	CGQVVSCSDILALAAR	NH2-C<Cmm*>GQVVSC<Cmm*>SDILALAAR-COOH	16	81	45	NH2			134_CGQVVSCSDILALAAR
Q9FXA2		PABP8_ARATH Polyadenylate-binding protein 8 OS=Arabidopsis thaliana OX=3702 GN=PAB8 PE=1	647	SVAQQQAGGAADQLASLSLGDNIVP	NH2-SVAQQQAGGAADQLASLSLGDNIVP-COOH	25	58	45	NH2			647_SVAQQQAGGAADQLASLSLGDNIVP
P42763		ERD14_ARATH Dehydrin ERD14 OS=Arabidopsis thaliana OX=3702 GN=ERD14 PE=1	2	AEEIKNVPEQEVPKVATEESSAEVTDR	Ace-AEEIK<But>NVPEQEVPK<But>VATEESSAEVTDR-COOH	27	52	45	Ace		Ace	2_AEEIKNVPEQEVPKVATEESSAEVTDR
P15455		CRU1_ARATH 12S seed storage protein CRA1 OS=Arabidopsis thaliana OX=3702 GN=CRA1 PE=1	24	QQGQQGQQFPNECQLDQLNALEPSHVLKSEAGR	NH2-Q<Pyr>QGQQGQQFPNEC<Cmm*>QLDQLNALEPSHVLK<But>SEAGR-COOH	33	76	43	NH2	Q<Pyr>		24_QQGQQGQQFPNECQLDQLNALEPSHVLKSEAGR
P38666	Q42347 (2-9)	RL242_ARATH 60S ribosomal protein L24-2 OS=Arabidopsis thaliana OX=3702 GN=RPL24B PE=1	2	VLKTELCR	But-VLK<But>TELC<Cmm*>R-COOH	8	48	45	But			2_VLKTELCR	But
P19036		HSP17_ARATH 17.4 kDa class I heat shock protein OS=Arabidopsis thaliana OX=3702 GN=HSP17.4A PE=1	2	SLVPSFFGGR	Ace-SLVPSFFGGR-COOH	10	54	45	Ace		Ace	2_SLVPSFFGGR
P38666	Q42347 (2-9)	RL242_ARATH 60S ribosomal protein L24-2 OS=Arabidopsis thaliana OX=3702 GN=RPL24B PE=1	2	VLKTELCR	But-VLK<But>TELC<Cmm*>R-COOH	8	49	45	But			2_VLKTELCR	But
Q38900		CP19A_ARATH Peptidyl-prolyl cis-trans isomerase CYP19-1 OS=Arabidopsis thaliana OX=3702 GN=CYP19-1 PE=2	2	ATNPKVYFDMTVGGKSAGR	Ace-ATNPK<But4C13>VYFDM<Mox*>TVGGK<But4C13>SAGR-COOH	19	70	46	Ace		Ace	2_ATNPKVYFDMTVGGKSAGR
O22959		PER19_ARATH Peroxidase 19 OS=Arabidopsis thaliana OX=3702 GN=PER19 PE=2	128	ALVESHCPSLVSCSDILAIAAR	But4C13-ALVESHC<Cmm*>PSLVSC<Cmm*>SDILAIAAR-COOH	22	89	45	But4C13			128_ALVESHCPSLVSCSDILAIAAR	But
P15455		CRU1_ARATH 12S seed storage protein CRA1 OS=Arabidopsis thaliana OX=3702 GN=CRA1 PE=1	24	QQGQQGQQFPNECQLDQLNALEPSHVLKSEAGR	NH2-Q<Pyr>QGQQGQQFPNEC<Cmm*>QLDQLNALEPSHVLK<But>SEAGR-COOH	33	141	43	NH2	Q<Pyr>		24_QQGQQGQQFPNECQLDQLNALEPSHVLKSEAGR
Q9SUB2		Q9SUB2_ARATH Late embryogenesis abundant protein (LEA) family protein OS=Arabidopsis thaliana OX=3702 GN=At4g21020 PE=2	252	KAEKDQKEDDFITFN	NH2-K<But4C13>AEK<But4C13>DQK<But4C13>EDDFITFN-COOH	15	56	46	NH2			252_KAEKDQKEDDFITFN
A0A1P8B2X5	O48726 (2-18)	A0A1P8B2X5_ARATH Regulatory particle non-ATPase 13 OS=Arabidopsis thaliana OX=3702 GN=RPN13 PE=4	2	SSSEAFPVMQEIMLEFR	Ace-SSSEAFPVM<Mox*>QEIM<Mox*>LEFR-COOH	17	50	42	Ace		Ace	2_SSSEAFPVMQEIMLEFR
Q0WSE9	Q9LF21 (2-18)	Q0WSE9_ARATH Eukaryotic translation initiation factor 3 subunit M OS=Arabidopsis thaliana OX=3702 GN=At5g15610 PE=1	2	TTIVPTSEEDPYLAIVR	Ace-TTIVPTSEEDPYLAIVR-COOH	17	87	46	Ace		Ace	2_TTIVPTSEEDPYLAIVR
Q39132		Q39132_ARATH At1g14950/F10B6_18 OS=Arabidopsis thaliana OX=3702 GN=MLP1 PE=2	62	CDGKQEVFKEKR	But4C13-C<Cmm*>DGK<But4C13>QEVFK<But4C13>EK<But4C13>R-COOH	12	86	45	But4C13			62_CDGKQEVFKEKR	But
F4JGY0	Q9ZS91 (2-16)	F4JGY0_ARATH Methionine sulfoxide reductase B5 OS=Arabidopsis thaliana OX=3702 GN=MSRB5 PE=1	2	AASPLVVQKTEEEWR	Ace-AASPLVVQK<But4C13>TEEEWR-COOH	15	89	46	Ace		Ace	2_AASPLVVQKTEEEWR
Q9FY61		TR120_ARATH Trafficking protein particle complex II-specific subunit 120 homolog OS=Arabidopsis thaliana OX=3702 GN=TRS120 PE=1	1	MEPDVSIETLSIIR	Ace-M<Mox*>EPDVSIETLSIIR-COOH	14	57	46	Ace		Ace	1_MEPDVSIETLSIIR
F4JLA9	Q96318 (477-495)	F4JLA9_ARATH Cruciferin 3 OS=Arabidopsis thaliana OX=3702 GN=CRU3 PE=1	406	ALPLEVISNGFQISPEEAR	NH2-ALPLEVISNGFQISPEEAR-COOH	19	48	45	NH2			406_ALPLEVISNGFQISPEEAR
P15455		CRU1_ARATH 12S seed storage protein CRA1 OS=Arabidopsis thaliana OX=3702 GN=CRA1 PE=1	25	QGQQGQQFPNECQLDQLNALEPSHVLKSEAGR	NH2-Q<Pyr>GQQGQQFPNEC<Cmm*>QLDQLNALEPSHVLK<But4C13>SEAGR-COOH	32	65	43	NH2	Q<Pyr>		25_QGQQGQQFPNECQLDQLNALEPSHVLKSEAGR
P15455		CRU1_ARATH 12S seed storage protein CRA1 OS=Arabidopsis thaliana OX=3702 GN=CRA1 PE=1	24	QQGQQGQQFPNECQLDQLNALEPSHVLKSEAGR	NH2-Q<Pyr>QGQQGQQFPNEC<Cmm*>QLDQLNALEPSHVLK<But>SEAGR-COOH	33	55	43	NH2	Q<Pyr>		24_QQGQQGQQFPNECQLDQLNALEPSHVLKSEAGR
A0A1P8B2X5	O48726 (2-18)	A0A1P8B2X5_ARATH Regulatory particle non-ATPase 13 OS=Arabidopsis thaliana OX=3702 GN=RPN13 PE=4	2	SSSEAFPVMQEIMLEFR	Ace-SSSEAFPVM<Mox*>QEIM<Mox*>LEFR-COOH	17	51	42	Ace		Ace	2_SSSEAFPVMQEIMLEFR
Q93ZX4		Q93ZX4_ARATH CwfJ-like family protein OS=Arabidopsis thaliana OX=3702 GN=At1g56290 PE=1	1	MFSGIKIIPR	Ace-M<Mox*>FSGIK<But4C13>IIPR-COOH	10	89	43	Ace		Ace	1_MFSGIKIIPR
Q9SJ44		UEV1C_ARATH Ubiquitin-conjugating enzyme E2 variant 1C OS=Arabidopsis thaliana OX=3702 GN=UEV1C PE=1	135	KLVQPPEGTFF	NH2-K<But>LVQPPEGTFF-COOH	11	49	45	NH2			135_KLVQPPEGTFF
A0A1P8B2X5	O48726 (2-18)	A0A1P8B2X5_ARATH Regulatory particle non-ATPase 13 OS=Arabidopsis thaliana OX=3702 GN=RPN13 PE=4	2	SSSEAFPVMQEIMLEFR	Ace-SSSEAFPVM<Mox*>QEIM<Mox*>LEFR-COOH	17	49	42	Ace		Ace	2_SSSEAFPVMQEIMLEFR
P15455	F4K8S2 (186-203)	CRU1_ARATH 12S seed storage protein CRA1 OS=Arabidopsis thaliana OX=3702 GN=CRA1 PE=1	373	VFDGQVSQGQLIAVPQGF	NH2-VFDGQVSQGQLIAVPQGF-COOH	18	46	46	NH2			373_VFDGQVSQGQLIAVPQGF
P15455		CRU1_ARATH 12S seed storage protein CRA1 OS=Arabidopsis thaliana OX=3702 GN=CRA1 PE=1	24	QQGQQGQQFPNECQLDQLNALEPSHVLKSEAGR	NH2-QQGQQGQQFPNEC<Cmm*>QLDQLNALEPSHVLK<But4C13>SEAGR-COOH	33	80	43	NH2			24_QQGQQGQQFPNECQLDQLNALEPSHVLKSEAGR
Q8W1X2		PDXK_ARATH Pyridoxal kinase OS=Arabidopsis thaliana OX=3702 GN=PK PE=1	2	TTPPVLSLALPSDTGR	Ace-TTPPVLSLALPSDTGR-COOH	16	83	45	Ace		Ace	2_TTPPVLSLALPSDTGR
P15455		CRU1_ARATH 12S seed storage protein CRA1 OS=Arabidopsis thaliana OX=3702 GN=CRA1 PE=1	25	QGQQGQQFPNECQLDQLNALEPSHVLKSEAGR	NH2-QGQQGQQFPNEC<Cmm*>QLDQLNALEPSHVLK<But4C13>SEAGR-COOH	32	61	44	NH2			25_QGQQGQQFPNECQLDQLNALEPSHVLKSEAGR
P15455		CRU1_ARATH 12S seed storage protein CRA1 OS=Arabidopsis thaliana OX=3702 GN=CRA1 PE=1	24	QQGQQGQQFPNECQLDQLNALEPSHVLKSEAGR	NH2-Q<Pyr>QGQQGQQFPNEC<Cmm*>QLDQLNALEPSHVLK<But>SEAGR-COOH	33	122	43	NH2	Q<Pyr>		24_QQGQQGQQFPNECQLDQLNALEPSHVLKSEAGR
P15455		CRU1_ARATH 12S seed storage protein CRA1 OS=Arabidopsis thaliana OX=3702 GN=CRA1 PE=1	25	QGQQGQQFPNECQLDQLNALEPSHVLKSEAGR	NH2-QGQQGQQFPNEC<Cmm*>QLDQLNALEPSHVLK<But>SEAGR-COOH	32	110	43	NH2			25_QGQQGQQFPNECQLDQLNALEPSHVLKSEAGR
Q39132		Q39132_ARATH At1g14950/F10B6_18 OS=Arabidopsis thaliana OX=3702 GN=MLP1 PE=2	64	GKQEVFKEKR	But4C13-GK<But4C13>QEVFK<But4C13>EK<But4C13>R-COOH	10	65	40	But4C13			64_GKQEVFKEKR	But
Q39132		Q39132_ARATH At1g14950/F10B6_18 OS=Arabidopsis thaliana OX=3702 GN=MLP1 PE=2	64	GKQEVFKEKR	But-GK<But>QEVFK<But>EK<But>R-COOH	10	66	44	But			64_GKQEVFKEKR	But
P15455		CRU1_ARATH 12S seed storage protein CRA1 OS=Arabidopsis thaliana OX=3702 GN=CRA1 PE=1	24	QQGQQGQQFPNECQLDQLNALEPSHVLKSEAGR	NH2-Q<Pyr>QGQQGQQFPNEC<Cmm*>QLDQLNALEPSHVLK<But>SEAGR-COOH	33	119	43	NH2	Q<Pyr>		24_QQGQQGQQFPNECQLDQLNALEPSHVLKSEAGR
P15455		CRU1_ARATH 12S seed storage protein CRA1 OS=Arabidopsis thaliana OX=3702 GN=CRA1 PE=1	24	QQGQQGQQFPNECQLDQLNALEPSHVLKSEAGR	NH2-QQGQQGQQFPNEC<Cmm*>QLDQLNALEPSHVLK<But>SEAGR-COOH	33	79	42	NH2			24_QQGQQGQQFPNECQLDQLNALEPSHVLKSEAGR
Q8W1X2		PDXK_ARATH Pyridoxal kinase OS=Arabidopsis thaliana OX=3702 GN=PK PE=1	2	TTPPVLSLALPSDTGR	Ace-TTPPVLSLALPSDTGR-COOH	16	52	45	Ace		Ace	2_TTPPVLSLALPSDTGR
Q9LF88		Y3304_ARATH Late embryogenesis abundant protein At3g53040 OS=Arabidopsis thaliana OX=3702 GN=At3g53040 PE=2	384	EEGKGSIMGALGNMTGAIKSKLTGATTPSDEETR	But-EEGK<But>GSIM<Mox*>GALGNM<Mox*>TGAIK<But>SK<But>LTGATTPSDEETR-COOH	34	47	44	But			384_EEGKGSIMGALGNMTGAIKSKLTGATTPSDEETR	But
Q93VP3		IF5A2_ARATH Eukaryotic translation initiation factor 5A-2 OS=Arabidopsis thaliana OX=3702 GN=ELF5A-2 PE=1	128	LGFDEGKDIVVSVM	NH2-LGFDEGK<But4C13>DIVVSVM<Mox*>-COOH	14	49	45	NH2			128_LGFDEGKDIVVSVM
F4HXW5	Q39133 (2-21)	F4HXW5_ARATH Polyketide cyclase/dehydrase and lipid transport superfamily protein OS=Arabidopsis thaliana OX=3702 GN=At1g14940 PE=4	2	AMSGTYVAEVPLKGSAEKHY	Ace-AM<Mox*>SGTYVAEVPLK<But4C13>GSAEK<But4C13>HY-COOH	20	79	45	Ace		Ace	2_AMSGTYVAEVPLKGSAEKHY
Q9LF88		Y3304_ARATH Late embryogenesis abundant protein At3g53040 OS=Arabidopsis thaliana OX=3702 GN=At3g53040 PE=2	383	GEEGKGSIMGALGNMTGAIKSKLTGATTPSDEETR	NH2-GEEGK<But4C13>GSIM<Mox*>GALGNM<Mox*>TGAIK<But4C13>SK<But4C13>LTGATTPSDEETR-COOH	35	92	44	NH2			383_GEEGKGSIMGALGNMTGAIKSKLTGATTPSDEETR
F4HXW5	Q39133 (2-21)	F4HXW5_ARATH Polyketide cyclase/dehydrase and lipid transport superfamily protein OS=Arabidopsis thaliana OX=3702 GN=At1g14940 PE=4	2	AMSGTYVAEVPLKGSAEKHY	Ace-AM<Mox*>SGTYVAEVPLK<But>GSAEK<But>HY-COOH	20	83	45	Ace		Ace	2_AMSGTYVAEVPLKGSAEKHY
Q96274		Q96274_ARATH Major latex homologue type2 OS=Arabidopsis thaliana OX=3702 GN=MLP2 PE=2	64	GKPEVIKEKR	But4C13-GK<But4C13>PEVIK<But4C13>EK<But4C13>R-COOH	10	61	38	But4C13			64_GKPEVIKEKR	But
Q96274		Q96274_ARATH Major latex homologue type2 OS=Arabidopsis thaliana OX=3702 GN=MLP2 PE=2	64	GKPEVIKEKR	But-GK<But>PEVIK<But>EK<But>R-COOH	10	67	41	But			64_GKPEVIKEKR	But
F4HXW5	Q39133 (2-21)	F4HXW5_ARATH Polyketide cyclase/dehydrase and lipid transport superfamily protein OS=Arabidopsis thaliana OX=3702 GN=At1g14940 PE=4	2	AMSGTYVAEVPLKGSAEKHY	Ace-AM<Mox*>SGTYVAEVPLK<But>GSAEK<But>HY-COOH	20	86	45	Ace		Ace	2_AMSGTYVAEVPLKGSAEKHY
P15455		CRU1_ARATH 12S seed storage protein CRA1 OS=Arabidopsis thaliana OX=3702 GN=CRA1 PE=1	25	QGQQGQQFPNECQLDQLNALEPSHVLKSEAGR	NH2-QGQQGQQFPNEC<Cmm*>QLDQLNALEPSHVLK<But>SEAGR-COOH	32	71	44	NH2			25_QGQQGQQFPNECQLDQLNALEPSHVLKSEAGR
Q39132		Q39132_ARATH At1g14950/F10B6_18 OS=Arabidopsis thaliana OX=3702 GN=MLP1 PE=2	64	GKQEVFKEKR	But-GK<But>QEVFK<But>EK<But>R-COOH	10	65	44	But			64_GKQEVFKEKR	But
P15455		CRU1_ARATH 12S seed storage protein CRA1 OS=Arabidopsis thaliana OX=3702 GN=CRA1 PE=1	25	QGQQGQQFPNECQLDQLNALEPSHVLKSEAGR	NH2-QGQQGQQFPNEC<Cmm*>QLDQLNALEPSHVLK<But>SEAGR-COOH	32	113	43	NH2			25_QGQQGQQFPNECQLDQLNALEPSHVLKSEAGR
Q39132		Q39132_ARATH At1g14950/F10B6_18 OS=Arabidopsis thaliana OX=3702 GN=MLP1 PE=2	64	GKQEVFKEKR	But-GK<But>QEVFK<But>EK<But>R-COOH	10	47	44	But			64_GKQEVFKEKR	But
A0A1P8B543	F4JLA9 (96-108)^AQ96318 (96-108)	A0A1P8B543_ARATH Cruciferin 3 OS=Arabidopsis thaliana OX=3702 GN=CRU3 PE=1	96	ISYVVQGTGISGR	But-ISYVVQGTGISGR-COOH	13	62	45	But			96_ISYVVQGTGISGR	But
P15455		CRU1_ARATH 12S seed storage protein CRA1 OS=Arabidopsis thaliana OX=3702 GN=CRA1 PE=1	24	QQGQQGQQFPNECQLDQLNALEPSHVLKSEAGR	NH2-QQGQQGQQFPNEC<Cmm*>QLDQLNALEPSHVLK<But>SEAGR-COOH	33	95	43	NH2			24_QQGQQGQQFPNECQLDQLNALEPSHVLKSEAGR
P15455		CRU1_ARATH 12S seed storage protein CRA1 OS=Arabidopsis thaliana OX=3702 GN=CRA1 PE=1	25	QGQQGQQFPNECQLDQLNALEPSHVLKSEAGR	NH2-QGQQGQQFPNEC<Cmm*>QLDQLNALEPSHVLK<But>SEAGR-COOH	32	122	43	NH2			25_QGQQGQQFPNECQLDQLNALEPSHVLKSEAGR
B3H4Y9	O23138 (2-20)	B3H4Y9_ARATH CYTOCHROME C-1 OS=Arabidopsis thaliana OX=3702 GN=CYTC-1 PE=1	2	ASFDEAPPGNAKAGEKIFR	Ace-ASFDEAPPGNAK<But4C13>AGEK<But4C13>IFR-COOH	19	49	45	Ace		Ace	2_ASFDEAPPGNAKAGEKIFR
B3H4Y9	O23138 (2-20)	B3H4Y9_ARATH CYTOCHROME C-1 OS=Arabidopsis thaliana OX=3702 GN=CYTC-1 PE=1	2	ASFDEAPPGNAKAGEKIFR	Ace-ASFDEAPPGNAK<But4C13>AGEK<But4C13>IFR-COOH	19	61	45	Ace		Ace	2_ASFDEAPPGNAKAGEKIFR
P15455		CRU1_ARATH 12S seed storage protein CRA1 OS=Arabidopsis thaliana OX=3702 GN=CRA1 PE=1	24	QQGQQGQQFPNECQLDQLNALEPSHVLKSEAGR	NH2-QQGQQGQQFPNEC<Cmm*>QLDQLNALEPSHVLK<But4C13>SEAGR-COOH	33	55	43	NH2			24_QQGQQGQQFPNECQLDQLNALEPSHVLKSEAGR
P15455		CRU1_ARATH 12S seed storage protein CRA1 OS=Arabidopsis thaliana OX=3702 GN=CRA1 PE=1	25	QGQQGQQFPNECQLDQLNALEPSHVLKSEAGR	NH2-Q<Pyr>GQQGQQFPNEC<Cmm*>QLDQLNALEPSHVLK<But>SEAGR-COOH	32	131	43	NH2	Q<Pyr>		25_QGQQGQQFPNECQLDQLNALEPSHVLKSEAGR
B3H4Y9	O23138 (2-20)	B3H4Y9_ARATH CYTOCHROME C-1 OS=Arabidopsis thaliana OX=3702 GN=CYTC-1 PE=1	2	ASFDEAPPGNAKAGEKIFR	Ace-ASFDEAPPGNAK<But4C13>AGEK<But4C13>IFR-COOH	19	74	45	Ace		Ace	2_ASFDEAPPGNAKAGEKIFR
P15455		CRU1_ARATH 12S seed storage protein CRA1 OS=Arabidopsis thaliana OX=3702 GN=CRA1 PE=1	25	QGQQGQQFPNECQLDQLNALEPSHVLKSEAGR	NH2-QGQQGQQFPNEC<Cmm*>QLDQLNALEPSHVLK<But>SEAGR-COOH	32	69	43	NH2			25_QGQQGQQFPNECQLDQLNALEPSHVLKSEAGR
P15455		CRU1_ARATH 12S seed storage protein CRA1 OS=Arabidopsis thaliana OX=3702 GN=CRA1 PE=1	25	QGQQGQQFPNECQLDQLNALEPSHVLKSEAGR	NH2-QGQQGQQFPNEC<Cmm*>QLDQLNALEPSHVLK<But4C13>SEAGR-COOH	32	85	43	NH2			25_QGQQGQQFPNECQLDQLNALEPSHVLKSEAGR
Q9LF88		Y3304_ARATH Late embryogenesis abundant protein At3g53040 OS=Arabidopsis thaliana OX=3702 GN=At3g53040 PE=2	383	GEEGKGSIMGALGNMTGAIKSKLTGATTPSDEETR	NH2-GEEGK<But4C13>GSIM<Mox*>GALGNM<Mox*>TGAIK<But4C13>SK<But4C13>LTGATTPSDEETR-COOH	35	104	45	NH2			383_GEEGKGSIMGALGNMTGAIKSKLTGATTPSDEETR
P15455		CRU1_ARATH 12S seed storage protein CRA1 OS=Arabidopsis thaliana OX=3702 GN=CRA1 PE=1	25	QGQQGQQFPNECQLDQLNALEPSHVLKSEAGR	NH2-Q<Pyr>GQQGQQFPNEC<Cmm*>QLDQLNALEPSHVLK<But>SEAGR-COOH	32	109	43	NH2	Q<Pyr>		25_QGQQGQQFPNECQLDQLNALEPSHVLKSEAGR
F4JUM1	F4JUM3 (2-22)^AQ8VXX0 (2-22)	F4JUM1_ARATH Protein transport protein SEC23 OS=Arabidopsis thaliana OX=3702 GN=At4g14160 PE=1	2	AEMADKAKVEEMDWEGIDGVR	Ace-AEM<Mox*>ADK<But>AK<But>VEEM<Mox*>DWEGIDGVR-COOH	21	65	42	Ace		Ace	2_AEMADKAKVEEMDWEGIDGVR
F4JC86	Q1EBV4 (399-414)	F4JC86_ARATH Ubiquitin family protein OS=Arabidopsis thaliana OX=3702 GN=DDI1 PE=1	398	LFEGNEEQAAGFLFGG	NH2-LFEGNEEQAAGFLFGG-COOH	16	44	43	NH2			398_LFEGNEEQAAGFLFGG
F4JUM1	F4JUM3 (2-22)^AQ8VXX0 (2-22)	F4JUM1_ARATH Protein transport protein SEC23 OS=Arabidopsis thaliana OX=3702 GN=At4g14160 PE=1	2	AEMADKAKVEEMDWEGIDGVR	Ace-AEM<Mox*>ADK<But4C13>AK<But4C13>VEEM<Mox*>DWEGIDGVR-COOH	21	72	43	Ace		Ace	2_AEMADKAKVEEMDWEGIDGVR
Q9SIN3		Q9SIN3_ARATH Late embryogenesis abundant domain-containing protein / LEA domain-containing protein OS=Arabidopsis thaliana OX=3702 GN=At2g42560 PE=4	52	GTQFVSLSDKGSNMPVSDEGEGETKMKR	But4C13-GTQFVSLSDK<But4C13>GSNM<Mox*>PVSDEGEGETK<But4C13>M<Mox*>K<But4C13>R-COOH	28	62	44	But4C13			52_GTQFVSLSDKGSNMPVSDEGEGETKMKR	But
F4JUM1	F4JUM3 (2-22)^AQ8VXX0 (2-22)	F4JUM1_ARATH Protein transport protein SEC23 OS=Arabidopsis thaliana OX=3702 GN=At4g14160 PE=1	2	AEMADKAKVEEMDWEGIDGVR	Ace-AEM<Mox*>ADK<But>AK<But>VEEM<Mox*>DWEGIDGVR-COOH	21	75	42	Ace		Ace	2_AEMADKAKVEEMDWEGIDGVR
Q93VP3		IF5A2_ARATH Eukaryotic translation initiation factor 5A-2 OS=Arabidopsis thaliana OX=3702 GN=ELF5A-2 PE=1	128	LGFDEGKDIVVSVM	NH2-LGFDEGK<But4C13>DIVVSVM<Mox*>-COOH	14	49	45	NH2			128_LGFDEGKDIVVSVM
F4JUM1	F4JUM3 (2-22)^AQ8VXX0 (2-22)	F4JUM1_ARATH Protein transport protein SEC23 OS=Arabidopsis thaliana OX=3702 GN=At4g14160 PE=1	2	AEMADKAKVEEMDWEGIDGVR	Ace-AEM<Mox*>ADK<But4C13>AK<But4C13>VEEM<Mox*>DWEGIDGVR-COOH	21	66	42	Ace		Ace	2_AEMADKAKVEEMDWEGIDGVR
P15455		CRU1_ARATH 12S seed storage protein CRA1 OS=Arabidopsis thaliana OX=3702 GN=CRA1 PE=1	24	QQGQQGQQFPNECQLDQLNALEPSHVLKSEAGR	NH2-Q<Pyr>QGQQGQQFPNEC<Cmm*>QLDQLNALEPSHVLK<But>SEAGR-COOH	33	70	42	NH2	Q<Pyr>		24_QQGQQGQQFPNECQLDQLNALEPSHVLKSEAGR
A0A1P8B2X5	O48726 (2-18)	A0A1P8B2X5_ARATH Regulatory particle non-ATPase 13 OS=Arabidopsis thaliana OX=3702 GN=RPN13 PE=4	2	SSSEAFPVMQEIMLEFR	Ace-SSSEAFPVM<Mox*>QEIM<Mox*>LEFR-COOH	17	59	42	Ace		Ace	2_SSSEAFPVMQEIMLEFR
Q9CA90		HPR2_ARATH Glyoxylate/hydroxypyruvate reductase A HPR2 OS=Arabidopsis thaliana OX=3702 GN=HPR2 PE=1	1	MESIGVLMMCPMSSYLENELEKR	Ace-M<Mox*>ESIGVLM<Mox*>M<Mox*>C<Cmm*>PM<Mox*>SSYLENELEK<But4C13>R-COOH	23	69	40	Ace		Ace	1_MESIGVLMMCPMSSYLENELEKR
Q9SW96		SYNC1_ARATH Asparagine--tRNA ligase, cytoplasmic 1 OS=Arabidopsis thaliana OX=3702 GN=SYNC1 PE=1	2	ADEIVPPATQLAAVSLENDGSTVQR	Ace-ADEIVPPATQLAAVSLENDGSTVQR-COOH	25	120	45	Ace		Ace	2_ADEIVPPATQLAAVSLENDGSTVQR
Q9CA90		HPR2_ARATH Glyoxylate/hydroxypyruvate reductase A HPR2 OS=Arabidopsis thaliana OX=3702 GN=HPR2 PE=1	1	MESIGVLMMCPMSSYLENELEKR	Ace-M<Mox*>ESIGVLM<Mox*>M<Mox*>C<Cmm*>PM<Mox*>SSYLENELEK<But>R-COOH	23	90	39	Ace		Ace	1_MESIGVLMMCPMSSYLENELEKR
P15455		CRU1_ARATH 12S seed storage protein CRA1 OS=Arabidopsis thaliana OX=3702 GN=CRA1 PE=1	24	QQGQQGQQFPNECQLDQLNALEPSHVLKSEAGR	NH2-QQGQQGQQFPNEC<Cmm*>QLDQLNALEPSHVLK<But4C13>SEAGR-COOH	33	57	43	NH2			24_QQGQQGQQFPNECQLDQLNALEPSHVLKSEAGR
P15455	F4K8S2 (186-208)	CRU1_ARATH 12S seed storage protein CRA1 OS=Arabidopsis thaliana OX=3702 GN=CRA1 PE=1	373	VFDGQVSQGQLIAVPQGFSVVKR	NH2-VFDGQVSQGQLIAVPQGFSVVK<But4C13>R-COOH	23	66	44	NH2			373_VFDGQVSQGQLIAVPQGFSVVKR
P15455	F4K8S2 (186-208)	CRU1_ARATH 12S seed storage protein CRA1 OS=Arabidopsis thaliana OX=3702 GN=CRA1 PE=1	373	VFDGQVSQGQLIAVPQGFSVVKR	NH2-VFDGQVSQGQLIAVPQGFSVVK<But>R-COOH	23	82	44	NH2			373_VFDGQVSQGQLIAVPQGFSVVKR
Q93VP3		IF5A2_ARATH Eukaryotic translation initiation factor 5A-2 OS=Arabidopsis thaliana OX=3702 GN=ELF5A-2 PE=1	128	LGFDEGKDIVVSVM	NH2-LGFDEGK<But4C13>DIVVSVM<Mox*>-COOH	14	49	45	NH2			128_LGFDEGKDIVVSVM
P15456		CRU2_ARATH 12S seed storage protein CRB OS=Arabidopsis thaliana OX=3702 GN=CRB PE=1	325	KNAMVLPQWNVNANAALYVTN	NH2-K<But>NAM<Mox*>VLPQWNVNANAALYVTN-COOH	21	48	46	NH2			325_KNAMVLPQWNVNANAALYVTN
Q9SW96		SYNC1_ARATH Asparagine--tRNA ligase, cytoplasmic 1 OS=Arabidopsis thaliana OX=3702 GN=SYNC1 PE=1	2	ADEIVPPATQLAAVSLENDGSTVQR	Ace-ADEIVPPATQLAAVSLENDGSTVQR-COOH	25	111	45	Ace		Ace	2_ADEIVPPATQLAAVSLENDGSTVQR
P19036		HSP17_ARATH 17.4 kDa class I heat shock protein OS=Arabidopsis thaliana OX=3702 GN=HSP17.4A PE=1	2	SLVPSFFGGR	Ace-SLVPSFFGGR-COOH	10	48	46	Ace		Ace	2_SLVPSFFGGR
F4J573		F4J573_ARATH Late embryogenesis abundant protein (LEA) family protein OS=Arabidopsis thaliana OX=3702 GN=At3g17520 PE=4	86	KAEEAVGAAKEKAGSAYETAKS	NH2-K<But4C13>AEEAVGAAK<But4C13>EK<But4C13>AGSAYETAK<But4C13>S-COOH	22	59	45	NH2			86_KAEEAVGAAKEKAGSAYETAKS
Q9SW96		SYNC1_ARATH Asparagine--tRNA ligase, cytoplasmic 1 OS=Arabidopsis thaliana OX=3702 GN=SYNC1 PE=1	2	ADEIVPPATQLAAVSLENDGSTVQR	Ace-ADEIVPPATQLAAVSLENDGSTVQR-COOH	25	113	45	Ace		Ace	2_ADEIVPPATQLAAVSLENDGSTVQR
P41916		RAN1_ARATH GTP-binding nuclear protein Ran-1 OS=Arabidopsis thaliana OX=3702 GN=RAN1 PE=1	200	NEAELLQAAAQPLPDDDDDIFE	NH2-NEAELLQAAAQPLPDDDDDIFE-COOH	22	51	41	NH2			200_NEAELLQAAAQPLPDDDDDIFE
Q9SW96		SYNC1_ARATH Asparagine--tRNA ligase, cytoplasmic 1 OS=Arabidopsis thaliana OX=3702 GN=SYNC1 PE=1	2	ADEIVPPATQLAAVSLENDGSTVQR	Ace-ADEIVPPATQLAAVSLENDGSTVQR-COOH	25	90	45	Ace		Ace	2_ADEIVPPATQLAAVSLENDGSTVQR
P48523		CADH4_ARATH Cinnamyl alcohol dehydrogenase 4 OS=Arabidopsis thaliana OX=3702 GN=CAD4 PE=1	2	GSVEAGEKKALGWAAR	Ace-GSVEAGEK<But4C13>K<But4C13>ALGWAAR-COOH	16	115	45	Ace		Ace	2_GSVEAGEKKALGWAAR
P48523		CADH4_ARATH Cinnamyl alcohol dehydrogenase 4 OS=Arabidopsis thaliana OX=3702 GN=CAD4 PE=1	2	GSVEAGEKKALGWAAR	Ace-GSVEAGEK<But>K<But>ALGWAAR-COOH	16	91	45	Ace		Ace	2_GSVEAGEKKALGWAAR
P48523		CADH4_ARATH Cinnamyl alcohol dehydrogenase 4 OS=Arabidopsis thaliana OX=3702 GN=CAD4 PE=1	2	GSVEAGEKKALGWAAR	Ace-GSVEAGEK<But4C13>K<But4C13>ALGWAAR-COOH	16	81	45	Ace		Ace	2_GSVEAGEKKALGWAAR
Q96274		Q96274_ARATH Major latex homologue type2 OS=Arabidopsis thaliana OX=3702 GN=MLP2 PE=2	2	AMSGKYVAEVPLKGSAEKH	Ace-AM<Mox*>SGK<But>YVAEVPLK<But>GSAEK<But>H-COOH	19	78	45	Ace		Ace	2_AMSGKYVAEVPLKGSAEKH
Q9FGT8		TIL_ARATH Temperature-induced lipocalin-1 OS=Arabidopsis thaliana OX=3702 GN=TIL PE=1	2	TEKKEMEVVKGLNVER	Ace-TEK<But4C13>K<But4C13>EM<Mox*>EVVK<But4C13>GLNVER-COOH	16	88	45	Ace		Ace	2_TEKKEMEVVKGLNVER
Q96274		Q96274_ARATH Major latex homologue type2 OS=Arabidopsis thaliana OX=3702 GN=MLP2 PE=2	2	AMSGKYVAEVPLKGSAEKH	Ace-AM<Mox*>SGK<But4C13>YVAEVPLK<But4C13>GSAEK<But4C13>H-COOH	19	83	45	Ace		Ace	2_AMSGKYVAEVPLKGSAEKH
Q96274		Q96274_ARATH Major latex homologue type2 OS=Arabidopsis thaliana OX=3702 GN=MLP2 PE=2	2	AMSGKYVAEVPLKGSAEKH	Ace-AM<Mox*>SGK<But>YVAEVPLK<But>GSAEK<But>H-COOH	19	59	45	Ace		Ace	2_AMSGKYVAEVPLKGSAEKH
Q9FGT8		TIL_ARATH Temperature-induced lipocalin-1 OS=Arabidopsis thaliana OX=3702 GN=TIL PE=1	2	TEKKEMEVVKGLNVER	Ace-TEK<But4C13>K<But4C13>EM<Mox*>EVVK<But4C13>GLNVER-COOH	16	52	45	Ace		Ace	2_TEKKEMEVVKGLNVER
Q96274		Q96274_ARATH Major latex homologue type2 OS=Arabidopsis thaliana OX=3702 GN=MLP2 PE=2	2	AMSGKYVAEVPLKGSAEKH	Ace-AM<Mox*>SGK<But4C13>YVAEVPLK<But4C13>GSAEK<But4C13>H-COOH	19	48	45	Ace		Ace	2_AMSGKYVAEVPLKGSAEKH
Q9FGT8		TIL_ARATH Temperature-induced lipocalin-1 OS=Arabidopsis thaliana OX=3702 GN=TIL PE=1	2	TEKKEMEVVKGLNVER	Ace-TEK<But>K<But>EM<Mox*>EVVK<But>GLNVER-COOH	16	112	45	Ace		Ace	2_TEKKEMEVVKGLNVER
P19036		HSP17_ARATH 17.4 kDa class I heat shock protein OS=Arabidopsis thaliana OX=3702 GN=HSP17.4A PE=1	2	SLVPSFFGGR	Ace-SLVPSFFGGR-COOH	10	52	45	Ace		Ace	2_SLVPSFFGGR
P15455	F4K8S2 (152-185)	CRU1_ARATH 12S seed storage protein CRA1 OS=Arabidopsis thaliana OX=3702 GN=CRA1 PE=1	339	NAMVLPQWNANANAILYVTDGEAQIQIVNDNGNR	NH2-NAM<Mox*>VLPQWNANANAILYVTDGEAQIQIVNDNGNR-COOH	34	112	44	NH2			339_NAMVLPQWNANANAILYVTDGEAQIQIVNDNGNR
Q8LGE7	Q9SQT4 (96-108)	NDA8B_ARATH NADH dehydrogenase [ubiquinone] 1 alpha subcomplex subunit 8-B OS=Arabidopsis thaliana OX=3702 GN=At5g18800 PE=1	94	KEQEAFEKVCPLK	NH2-K<But4C13>EQEAFEK<But4C13>VC<Cmm*>PLK<But4C13>-COOH	13	55	45	NH2			94_KEQEAFEKVCPLK
Q3E8H9	Q9FKV7 (89-103)	Q3E8H9_ARATH Late embryogenesis abundant protein (LEA) family protein OS=Arabidopsis thaliana OX=3702 GN=At5g44310 PE=4	53	TKEEAKDKAYDMKER	But-TK<But>EEAK<But>DK<But>AYDM<Mox*>K<But>ER-COOH	15	69	45	But			53_TKEEAKDKAYDMKER	But
P15455		CRU1_ARATH 12S seed storage protein CRA1 OS=Arabidopsis thaliana OX=3702 GN=CRA1 PE=1	26	GQQGQQFPNECQLDQLNALEPSHVLKSEAGR	But-GQQGQQFPNEC<Cmm*>QLDQLNALEPSHVLK<But>SEAGR-COOH	31	79	44	But			26_GQQGQQFPNECQLDQLNALEPSHVLKSEAGR	But
Q3E8H9	Q9FKV7 (89-103)	Q3E8H9_ARATH Late embryogenesis abundant protein (LEA) family protein OS=Arabidopsis thaliana OX=3702 GN=At5g44310 PE=4	53	TKEEAKDKAYDMKER	But-TK<But>EEAK<But>DK<But>AYDM<Mox*>K<But>ER-COOH	15	66	45	But			53_TKEEAKDKAYDMKER	But
P15455		CRU1_ARATH 12S seed storage protein CRA1 OS=Arabidopsis thaliana OX=3702 GN=CRA1 PE=1	26	GQQGQQFPNECQLDQLNALEPSHVLKSEAGR	But-GQQGQQFPNEC<Cmm*>QLDQLNALEPSHVLK<But>SEAGR-COOH	31	59	43	But			26_GQQGQQFPNECQLDQLNALEPSHVLKSEAGR	But
F4JBY2	Q8RWV0 (68-89)	F4JBY2_ARATH Transketolase OS=Arabidopsis thaliana OX=3702 GN=AtTKL1 PE=1	68	AVETVEPTTDSSIVDKSVNSIR	But-AVETVEPTTDSSIVDK<But>SVNSIR-COOH	22	101	45	But			68_AVETVEPTTDSSIVDKSVNSIR	But
P15455		CRU1_ARATH 12S seed storage protein CRA1 OS=Arabidopsis thaliana OX=3702 GN=CRA1 PE=1	25	QGQQGQQFPNECQLDQLNALEPSHVLKSEAGR	NH2-Q<Pyr>GQQGQQFPNEC<Cmm*>QLDQLNALEPSHVLK<But4C13>SEAGR-COOH	32	115	43	NH2	Q<Pyr>		25_QGQQGQQFPNECQLDQLNALEPSHVLKSEAGR
F4JLA9	Q96318 (414-439)	F4JLA9_ARATH Cruciferin 3 OS=Arabidopsis thaliana OX=3702 GN=CRU3 PE=1	343	IQVVNDNGQNVLDQQVQKGQLVVIPQ	NH2-IQVVNDNGQNVLDQQVQK<But>GQLVVIPQ-COOH	26	47	44	NH2			343_IQVVNDNGQNVLDQQVQKGQLVVIPQ
F4KAP2	O82514 (2-24)	F4KAP2_ARATH Adenylate kinase 1 OS=Arabidopsis thaliana OX=3702 GN=ADK1 PE=1	2	ATGGAAADLEDVQTVDLMSELLR	Ace-ATGGAAADLEDVQTVDLM<Mox*>SELLR-COOH	23	109	45	Ace		Ace	2_ATGGAAADLEDVQTVDLMSELLR
Q9C5Z3		EIF3E_ARATH Eukaryotic translation initiation factor 3 subunit E OS=Arabidopsis thaliana OX=3702 GN=TIF3E1 PE=1	1	MEESKQNYDLTPLIAPNLDR	Ace-M<Mox*>EESK<But4C13>QNYDLTPLIAPNLDR-COOH	20	64	45	Ace		Ace	1_MEESKQNYDLTPLIAPNLDR
O65282		CH20_ARATH 20 kDa chaperonin, chloroplastic OS=Arabidopsis thaliana OX=3702 GN=CPN20 PE=1	75	EAEEKTLGGILLPSTAQSKPQGGEVVAVGEGR	NH2-EAEEK<But4C13>TLGGILLPSTAQSK<But4C13>PQGGEVVAVGEGR-COOH	32	59	44	NH2			75_EAEEKTLGGILLPSTAQSKPQGGEVVAVGEGR
F4KAP2	O82514 (2-24)	F4KAP2_ARATH Adenylate kinase 1 OS=Arabidopsis thaliana OX=3702 GN=ADK1 PE=1	2	ATGGAAADLEDVQTVDLMSELLR	Ace-ATGGAAADLEDVQTVDLM<Mox*>SELLR-COOH	23	53	45	Ace		Ace	2_ATGGAAADLEDVQTVDLMSELLR
Q9C5Z3		EIF3E_ARATH Eukaryotic translation initiation factor 3 subunit E OS=Arabidopsis thaliana OX=3702 GN=TIF3E1 PE=1	1	MEESKQNYDLTPLIAPNLDR	Ace-M<Mox*>EESK<But4C13>QNYDLTPLIAPNLDR-COOH	20	99	45	Ace		Ace	1_MEESKQNYDLTPLIAPNLDR
Q9LNQ6		Q9LNQ6_ARATH At1g17490/F1L3_4 OS=Arabidopsis thaliana OX=3702 GN=At1g17490 PE=2	2	AEPKQSSLSEVKTNVIGSR	Ace-AEPK<But4C13>QSSLSEVK<But4C13>TNVIGSR-COOH	19	84	45	Ace		Ace	2_AEPKQSSLSEVKTNVIGSR
Q9SIN3		Q9SIN3_ARATH Late embryogenesis abundant domain-containing protein / LEA domain-containing protein OS=Arabidopsis thaliana OX=3702 GN=At2g42560 PE=4	545	GSEKDVFGYGPKGTVEEAR	But4C13-GSEK<But4C13>DVFGYGPK<But4C13>GTVEEAR-COOH	19	86	45	But4C13			545_GSEKDVFGYGPKGTVEEAR	But
F4JSG6	Q8GX17 (174-189)	F4JSG6_ARATH Ankyrin repeat family protein OS=Arabidopsis thaliana OX=3702 GN=At4g19150 PE=1	151	KAKVNNEKKTEIVKPE	NH2-K<But4C13>AK<But4C13>VNNEK<But4C13>K<But4C13>TEIVK<But4C13>PE-COOH	16	47	37	NH2			151_KAKVNNEKKTEIVKPE
F4JSG6	Q8GX17 (174-189)	F4JSG6_ARATH Ankyrin repeat family protein OS=Arabidopsis thaliana OX=3702 GN=At4g19150 PE=1	151	KAKVNNEKKTEIVKPE	NH2-K<But>AK<But>VNNEK<But>K<But>TEIVK<But>PE-COOH	16	46	41	NH2			151_KAKVNNEKKTEIVKPE
P15455	F4K8S2 (239-257)	CRU1_ARATH 12S seed storage protein CRA1 OS=Arabidopsis thaliana OX=3702 GN=CRA1 PE=1	426	GLPLEVITNGFQISPEEAR	NH2-GLPLEVITNGFQISPEEAR-COOH	19	85	45	NH2			426_GLPLEVITNGFQISPEEAR
Q9SIN3		Q9SIN3_ARATH Late embryogenesis abundant domain-containing protein / LEA domain-containing protein OS=Arabidopsis thaliana OX=3702 GN=At2g42560 PE=4	545	GSEKDVFGYGPKGTVEEAR	But-GSEK<But>DVFGYGPK<But>GTVEEAR-COOH	19	74	45	But			545_GSEKDVFGYGPKGTVEEAR	But
P15455		CRU1_ARATH 12S seed storage protein CRA1 OS=Arabidopsis thaliana OX=3702 GN=CRA1 PE=1	24	QQGQQGQQFPNECQLDQLNALEPSHVLKSEAGR	NH2-Q<Pyr>QGQQGQQFPNEC<Cmm*>QLDQLNALEPSHVLK<But4C13>SEAGR-COOH	33	66	43	NH2	Q<Pyr>		24_QQGQQGQQFPNECQLDQLNALEPSHVLKSEAGR
Q8LEM4		ATG8A_ARATH Autophagy-related protein 8a OS=Arabidopsis thaliana OX=3702 GN=ATG8A PE=1	2	AKSSFKISNPLEAR	Ace-AK<But4C13>SSFK<But4C13>ISNPLEAR-COOH	14	65	43	Ace		Ace	2_AKSSFKISNPLEAR
Q9SUB2		Q9SUB2_ARATH Late embryogenesis abundant protein (LEA) family protein OS=Arabidopsis thaliana OX=3702 GN=At4g21020 PE=2	252	KAEKDQKEDDFITFN	NH2-K<But4C13>AEK<But4C13>DQK<But4C13>EDDFITFN-COOH	15	49	46	NH2			252_KAEKDQKEDDFITFN
Q9SUB2		Q9SUB2_ARATH Late embryogenesis abundant protein (LEA) family protein OS=Arabidopsis thaliana OX=3702 GN=At4g21020 PE=2	252	KAEKDQKEDDFITFN	NH2-K<But>AEK<But>DQK<But>EDDFITFN-COOH	15	77	45	NH2			252_KAEKDQKEDDFITFN
Q8LEM4		ATG8A_ARATH Autophagy-related protein 8a OS=Arabidopsis thaliana OX=3702 GN=ATG8A PE=1	2	AKSSFKISNPLEAR	Ace-AK<But4C13>SSFK<But4C13>ISNPLEAR-COOH	14	85	44	Ace		Ace	2_AKSSFKISNPLEAR
F4IHK9	Q03250 (10-22)	F4IHK9_ARATH Cold, circadian rhythm, and rna binding 2 OS=Arabidopsis thaliana OX=3702 GN=GRP7 PE=1	10	CFVGGLAWATDDR	NH2-C<Cmm*>FVGGLAWATDDR-COOH	13	62	43	NH2			10_CFVGGLAWATDDR
Q9LUJ7		PAP85_ARATH Vicilin-like seed storage protein At3g22640 OS=Arabidopsis thaliana OX=3702 GN=PAP85 PE=2	261	AKKEKEEDKDLR	But4C13-AK<But4C13>K<But4C13>EK<But4C13>EEDK<But4C13>DLR-COOH	12	63	42	But4C13			261_AKKEKEEDKDLR	But
Q9FGT8		TIL_ARATH Temperature-induced lipocalin-1 OS=Arabidopsis thaliana OX=3702 GN=TIL PE=1	2	TEKKEMEVVKGLNVER	Ace-TEK<But4C13>K<But4C13>EM<Mox*>EVVK<But4C13>GLNVER-COOH	16	88	45	Ace		Ace	2_TEKKEMEVVKGLNVER
F4K9K2	F4K9K4 (1-13)^AQ8VZU2 (1-13)	F4K9K2_ARATH Syntaxin of plants 132 OS=Arabidopsis thaliana OX=3702 GN=SYP132 PE=1	1	MNDLLKGSFELPR	Ace-M<Mox*>NDLLK<But4C13>GSFELPR-COOH	13	76	46	Ace		Ace	1_MNDLLKGSFELPR
Q9FGT8		TIL_ARATH Temperature-induced lipocalin-1 OS=Arabidopsis thaliana OX=3702 GN=TIL PE=1	2	TEKKEMEVVKGLNVER	Ace-TEK<But>K<But>EM<Mox*>EVVK<But>GLNVER-COOH	16	102	45	Ace		Ace	2_TEKKEMEVVKGLNVER
Q9FGT8		TIL_ARATH Temperature-induced lipocalin-1 OS=Arabidopsis thaliana OX=3702 GN=TIL PE=1	2	TEKKEMEVVKGLNVER	Ace-TEK<But>K<But>EM<Mox*>EVVK<But>GLNVER-COOH	16	74	45	Ace		Ace	2_TEKKEMEVVKGLNVER
Q9FGT8		TIL_ARATH Temperature-induced lipocalin-1 OS=Arabidopsis thaliana OX=3702 GN=TIL PE=1	2	TEKKEMEVVKGLNVER	Ace-TEK<But4C13>K<But4C13>EM<Mox*>EVVK<But4C13>GLNVER-COOH	16	73	45	Ace		Ace	2_TEKKEMEVVKGLNVER
Q9SD78		Q9SD78_ARATH Furry OS=Arabidopsis thaliana OX=3702 GN=F13G24.260 PE=2	2	AKSVSTAASSLVQNLR	Ace-AK<But4C13>SVSTAASSLVQNLR-COOH	16	85	44	Ace		Ace	2_AKSVSTAASSLVQNLR
Q9SIN3		Q9SIN3_ARATH Late embryogenesis abundant domain-containing protein / LEA domain-containing protein OS=Arabidopsis thaliana OX=3702 GN=At2g42560 PE=4	579	YVEEEGVGAGGVLGAIGETIA	NH2-YVEEEGVGAGGVLGAIGETIA-COOH	21	58	45	NH2			579_YVEEEGVGAGGVLGAIGETIA
P57752		ACBP6_ARATH Acyl-CoA-binding domain-containing protein 6 OS=Arabidopsis thaliana OX=3702 GN=ACBP6 PE=1	79	VKQLLEVAASKAST	NH2-VK<But4C13>QLLEVAASK<But4C13>AST-COOH	14	43	42	NH2			79_VKQLLEVAASKAST
A0A1P8B543	F4JLA9 (293-308)^AQ96318 (364-379)	A0A1P8B543_ARATH Cruciferin 3 OS=Arabidopsis thaliana OX=3702 GN=CRU3 PE=1	348	VTSVNSYTLPILEYVR	NH2-VTSVNSYTLPILEYVR-COOH	16	113	45	NH2			348_VTSVNSYTLPILEYVR
Q9SIN3		Q9SIN3_ARATH Late embryogenesis abundant domain-containing protein / LEA domain-containing protein OS=Arabidopsis thaliana OX=3702 GN=At2g42560 PE=4	579	YVEEEGVGAGGVLGAIGETIA	NH2-YVEEEGVGAGGVLGAIGETIA-COOH	21	50	46	NH2			579_YVEEEGVGAGGVLGAIGETIA
F4KAP2	O82514 (2-24)	F4KAP2_ARATH Adenylate kinase 1 OS=Arabidopsis thaliana OX=3702 GN=ADK1 PE=1	2	ATGGAAADLEDVQTVDLMSELLR	Ace-ATGGAAADLEDVQTVDLM<Mox*>SELLR-COOH	23	118	45	Ace		Ace	2_ATGGAAADLEDVQTVDLMSELLR
Q9SD78		Q9SD78_ARATH Furry OS=Arabidopsis thaliana OX=3702 GN=F13G24.260 PE=2	2	AKSVSTAASSLVQNLR	Ace-AK<But4C13>SVSTAASSLVQNLR-COOH	16	75	44	Ace		Ace	2_AKSVSTAASSLVQNLR
F4KAP2	O82514 (2-24)	F4KAP2_ARATH Adenylate kinase 1 OS=Arabidopsis thaliana OX=3702 GN=ADK1 PE=1	2	ATGGAAADLEDVQTVDLMSELLR	Ace-ATGGAAADLEDVQTVDLM<Mox*>SELLR-COOH	23	65	45	Ace		Ace	2_ATGGAAADLEDVQTVDLMSELLR
Q8H0V6		AB3F_ARATH ABC transporter F family member 3 OS=Arabidopsis thaliana OX=3702 GN=ABCF3 PE=1	2	TEVASSVVYEVLGR	Ace-TEVASSVVYEVLGR-COOH	14	73	46	Ace		Ace	2_TEVASSVVYEVLGR
Q9FGT8		TIL_ARATH Temperature-induced lipocalin-1 OS=Arabidopsis thaliana OX=3702 GN=TIL PE=1	2	TEKKEMEVVKGLNVER	Ace-TEK<But>K<But>EM<Mox*>EVVK<But>GLNVER-COOH	16	106	45	Ace		Ace	2_TEKKEMEVVKGLNVER
P15455		CRU1_ARATH 12S seed storage protein CRA1 OS=Arabidopsis thaliana OX=3702 GN=CRA1 PE=1	24	QQGQQGQQFPNECQLDQLNALEPSHVLKSEAGR	NH2-Q<Pyr>QGQQGQQFPNEC<Cmm*>QLDQLNALEPSHVLK<But4C13>SEAGR-COOH	33	119	43	NH2	Q<Pyr>		24_QQGQQGQQFPNECQLDQLNALEPSHVLKSEAGR
P15455		CRU1_ARATH 12S seed storage protein CRA1 OS=Arabidopsis thaliana OX=3702 GN=CRA1 PE=1	25	QGQQGQQFPNECQLDQLNALEPSHVLKSEAGR	NH2-Q<Pyr>GQQGQQFPNEC<Cmm*>QLDQLNALEPSHVLK<But4C13>SEAGR-COOH	32	67	43	NH2	Q<Pyr>		25_QGQQGQQFPNECQLDQLNALEPSHVLKSEAGR
Q9SUB2		Q9SUB2_ARATH Late embryogenesis abundant protein (LEA) family protein OS=Arabidopsis thaliana OX=3702 GN=At4g21020 PE=2	252	KAEKDQKEDDFITFN	NH2-K<But4C13>AEK<But4C13>DQK<But4C13>EDDFITFN-COOH	15	47	46	NH2			252_KAEKDQKEDDFITFN
Q9SUB2		Q9SUB2_ARATH Late embryogenesis abundant protein (LEA) family protein OS=Arabidopsis thaliana OX=3702 GN=At4g21020 PE=2	252	KAEKDQKEDDFITFN	NH2-K<But>AEK<But>DQK<But>EDDFITFN-COOH	15	77	45	NH2			252_KAEKDQKEDDFITFN
Q9FGT8		TIL_ARATH Temperature-induced lipocalin-1 OS=Arabidopsis thaliana OX=3702 GN=TIL PE=1	2	TEKKEMEVVKGLNVER	Ace-TEK<But4C13>K<But4C13>EM<Mox*>EVVK<But4C13>GLNVER-COOH	16	106	44	Ace		Ace	2_TEKKEMEVVKGLNVER
Q9FGT8		TIL_ARATH Temperature-induced lipocalin-1 OS=Arabidopsis thaliana OX=3702 GN=TIL PE=1	2	TEKKEMEVVKGLNVER	Ace-TEK<But>K<But>EM<Mox*>EVVK<But>GLNVER-COOH	16	60	45	Ace		Ace	2_TEKKEMEVVKGLNVER
Q9FGT8		TIL_ARATH Temperature-induced lipocalin-1 OS=Arabidopsis thaliana OX=3702 GN=TIL PE=1	2	TEKKEMEVVKGLNVER	Ace-TEK<But4C13>K<But4C13>EM<Mox*>EVVK<But4C13>GLNVER-COOH	16	85	45	Ace		Ace	2_TEKKEMEVVKGLNVER
[truncated: 934 more rows]

## Sheet: S2 proteinNterm True
Accession	Description	Sequence	Protein start position	shifted Log2 L/H	L/H ratio	log2 L/H	L.H.First.modification.AcetylNterm.present.	L/H True or false	Macot score	Mascot identitythreshold	L/H modified sequences	modification ButylNterm present
[truncated: 112 more rows]

[truncated: 14 more sheets: S3 SCX statistics, S4_Quantitation_VALIDATED, S1  identified peptides (2), S2 proteinNterm True (2), S3 SCX statistics (2), S4_Quantitation_VALIDATED (2), S1  identified peptides (3), S2 proteinNterm True (3), S3 SCX statistics (3), S4_Quantitation_VALIDATED ( (3), S1  identified peptides (4), S2 proteinNterm True (4), S3 SCX statistics (4), S4_Quantitation_VALIDATED ( (4)]
