# Supplementary material for: Seed Longevity is Controlled by Metacaspases
Source: Research Square preprint supplement (doi:10.21203/rs.3.rs-2836590/v1), 2023-05-02
Supplement: Supplementary file 4 [file e4c5c8a17817ec7de3eff0ac.xlsx]

## Sheet: Resource Table
Reagent or Resource	Reference or Source	Identifier or Catalog Number
Species
One Shot® ccdB Survival™ 2 T1R Competent Cells	ThermoFisher Scientific	Cat# A10460
Subcloning Efficiency DH5alpha chemically competent cells	ThermoFisher Scientific	Cat# 18265-017
NEB® 10-beta Competent E. coli	New England BioLab	Cat# C3019I
NEB® 5-alpha F'Iq Competent E. coli (High Efficiency)	New England BioLab	Cat# C2992I
Agrobacterium tumefaciens: GV3101 strain	N/A	N/A
Recombinant DNA
pICSL86900-OD	Goldengate system	Addgene Plasmid #86178
pICSL90002	Goldengate system
pICSL11015	Goldengate system
pICH47811	Goldengate system
pICH7751	Goldengate system
pICH7761	Goldengate system
pICH7772	Goldengate system
pICH7781	Goldengate system
pICSL13002	Goldengate system	Addgene Plasmid #50266
pAGM4723	Goldengate system	Addgene Plasmid #48002
pICSL4723	Goldengate system	Addgene Plasmid #50337
pDONR-Zeo	Gateway empty vector	Addgene Plasmid #
pGWB560	Gateway empty vector	Nakagawa et al., 2008
pG5 (RPS5apro:HF-GW-tagRFP)	Customised Gateway empty vector/this paper
pIF1 (RPS5apro:HF-mScarlet-GW)	Customised Gateway empty vector/this paper
pIF22 (RPS5apro:mNeon-GW)	Customised Gateway empty vector/this paper
35Spro:mCherry-PUX10		described in Arora et al., 2020
35Spro:mCherry-CDC48a
MCA-II-apro:MCA-IIa-GFP	This paper
RPS5apro:MCA-IIa-mNeon	Gutierrez-Beltran et al., 2015
RPS5apro:HF-MCA-IIa-tagRFP	This paper
Antibodies
Mouse anti-MCA-IIa	This paper
Goat anti-CDC48(VCP1)	Abcam	Cat# 206320
Monoclonal ANTI-FLAG® M2-Peroxidase (HRP)	Sigma-Aldrich	Cat# A8592
Monoclonal mouse ANTI-FLAG® M2	Sigma-Aldrich	Cat# F1804
Polyclonal Rabbit Anti-Green Fluorescent Protein (GFP)	Millipore	Cat# AB10145
Monoclonal Mouse Anti-GFP antibody	Sigma-Aldrich	Cat# SAB2702197
Monoclonal Mouse Anti-Red Fluorescent Protein (RFP) (clone RF5R)	Agrisera	Cat# AS15 3028
Rabbit anti-OLE1	Kind gift	Sabine D`Andrea
Rabbit anti-12S	Kind gift	Ikuko Hara-Nishimura
Rabbit anti-NAI2	Agrisera	Cat# AS20 4421
Rabbit anti-PYK10	Agrisera	Cat# AS20 4409
Rabbit anti-APX1	Agrisera	Cat# AS15 2992
Rabbit anti-UBQ11	Agrisera	Cat# AS08 307
Rabbit anti-PBA1	Agrisera	Cat# AS19 4260
Rabbit anti-PAG1	Agrisera	Cat# AS19 4259
Rabbit anti-BIP	Agrisera	Cat# AS09 481
Rabbit anti-BG1	Agrisera	Cat# AS20 4419
Rabbit anti-actin		Cat# AS13 2640
Monoclonal Rat Anti-tubulin (YL1/2)	Santa Cruz Biotechnology	Cat# sc-53029
Alexa Fluor® 488 phalloidin	ThermoFisher Scientific	Cat# A12379
Alexa Fluor® 488 AffiniPure Donkey Anti-Sheep IgG (H+L)	Jackson ImmunoResearch	Cat# 713-545-147
Alexa Fluor® 488 AffiniPure Donkey Anti-Goat IgG (H+L)	Jackson ImmunoResearch	Cat# 705-545-147
DyLight™ 594 AffiniPure Fab Fragment Rabbit Anti-Mouse IgG (H+L)	Jackson ImmunoResearch	Cat# 315-517-003
DyLight™ 549 AffiniPure Fab Fragment Rabbit Anti-Mouse IgG (H+L)	Jackson ImmunoResearch	Cat# 315-507-003
DyLight™ 405 AffiniPure Alpaca Anti-Rabbit IgG (H+L)	Jackson ImmunoResearch	Cat# 611-475-215
Rhodamine Red™-X (RRX) 570 AffiniPure Donkey Anti-Guinea Pig IgG (H+L)	Jackson ImmunoResearch	Cat# 706-295-148
Rhodamine Red™-X (RRX) 570 AffiniPure Donkey Anti-Rabbit IgG (H+L)	Jackson ImmunoResearch	Cat# 711-295-152
Rhodamine Red™-X (RRX) 570 AffiniPure Donkey Anti-Mouse IgG (H+L)	Jackson ImmunoResearch	Cat# 715-295-151
Alexa Fluor® 647 AffiniPure Donkey Anti-Mouse IgG (H+L)	Jackson ImmunoResearch	Cat# 715-605-151
Tetramethylrhodamine (TRITC) Donkey Anti-Rabbit IgG (H+L)	Jackson ImmunoResearch	Cat# 711-026-152
Fluorescein (FITC) AffiniPure Donkey Anti-Rabbit IgG (H+L)	Jackson ImmunoResearch	Cat# 711-095-152
Rhodamine (TRITC) AffiniPure Donkey Anti-Rat IgG (H+L)	Jackson ImmunoResearch	Cat# 712-025-153
FITC-AffiniPure Goat Anti-Rat IgG (H+L)	Jackson ImmunoResearch	Cat# 112-095-167
IRDye® 680LT Goat anti-Mouse IgG (H + L)	LI-COR	Cat# 925-68020
IRDye® 800CW Goat anti-Rat IgG (H + L)	LI-COR	Cat# 925-32219
Rabbit anti-Sheep IgG (H+L) Secondary Antibody, HRP	ThermoFisher Scientific	Cat# 61-8620
Amersham ECL Rabbit IgG, HRP-linked whole Ab (from donkey)	Amersham	Cat# NA934
Amersham ECL Mouse IgG, HRP-linked whole Ab (from sheep)	Amersham	Cat# NA931
Polyclonal rabbit anti-His
Oligonucleotides and sequence-based reagents
Primers used for cloning	This study	Appendix table 1
Primers used for verification of T-DNA mutants	This study	Appendix table 2
Primers used for generating CRISPR mutants	This study	Appendix table 3
Primers used for qRT-PCR	This study	Appendix table 4
Chemicals, enzymes and other reagents
Dynabeads® M-280 Streptavidin	ThermoFisher Scientific	Cat# 11205D
PD-10 Desalting Columns	Cytiva	Cat# 17085101
Glutathione Sepharose 4B	Cytiva	Cat# 17075601
IgG sepharose	Cytiva	Cat# 170969-01
Ni-NTA Agarose	Qiagen Ab	Cat# 30210
HisPur™ Cobalt Resin	ThermoFisher Scientific	Cat# 89964
Duolink® In Situ PLA® Probe Anti-Rabbit PLUS Affinity purified Donkey anti-Rabbit IgG (H+L)	Sigma-Aldrich	Cat# DUO92002-100RXN
Duolink® In Situ PLA® Probe Anti-Mouse MINUS Affinity purified Donkey anti-Mouse IgG (H+L)	Sigma-Aldrich	Cat# DUO92004-100RXN
Duolink® In Situ PLA® Probe Anti-Goat PLUS Affinity purified Donkey anti-Goat IgG (H+L)	Sigma-Aldrich	Cat# DUO92003-100RXN
Duolink® In Situ Detection Reagents Red	Sigma-Aldrich	Cat# DUO92008-100RXN
Duolink® In Situ Detection Reagents FarRed	Sigma-Aldrich	Cat# DUO92013-100RXN
Duolink® In Situ Probemaker PLUS	Sigma-Aldrich	Cat# DUO92009-1KT
Duolink® In Situ Wash Buffers, Fluorescence	Sigma-Aldrich	Cat# DUO82049
Gentamycin sulphate	Saveen Werner AB (Duchefa)	Cat# G0124.0005
Ampicillin	Saveen Werner AB (Duchefa)	Cat# A0104.0010
Spectinomycin	Saveen Werner AB (Duchefa)	Cat# S0188.0005
Rifampicin	Saveen Werner AB (Duchefa)	Cat# R0146.0005
Kanamycin	Saveen Werner AB (Duchefa)	Cat# K0126.0005
Biotin	Sigma-Aldrich	Cat# B4501
Amiprofos methyl (APM)	Sigma-Aldrich	Cat# 3992
Latrunculin B (Lat B)	Sigma-Aldrich	Cat# L5288
LY-294,002 hydrochloride	Sigma-Aldrich	Cat# L9908
Cytochalasin D (Cyt D)	Santa Cruz Biotechnology	Cat# sc-201442
Dithiothreitol (DTT)	ThermoFisher Scientific	Cat# R0861
Dexamethasone	Sigma-Aldrich	Cat# D1756
Propidium iodide	ThermoFisher Scientific	Cat# P3566
Protease inhibitors cocktail	Sigma-Aldrich	Cat# P9599
PhosSTOP	Roche	Cat# 4906845001
Propidium Iodide	Sigma-Aldrich	Cat# P4170
IGEPAL CA-630	Sigma-Aldrich	Cat# I8896
Isopropyl-b-D-1thiogalactopyranoside (IPTG)	Sigma-Aldrich	Cat# I6758
Imidazole	Sigma-Aldrich	Cat# 56748
TRIzol® Reagent	ThermoFisher Scientific	Cat# 15596018
30% Acrylamide/Bis Solution, 29:1	Biorad	Cat# 161-0156
4x Laemmli Sample Buffer	Biorad	Cat# 1610747
RiboLock Rnase Inhibitor	ThermoFisher Scientific	Cat# EO0381
DNase I, RNase-free	ThermoFisher Scientific	Cat# EN0521
Proteinase K, RNase-free	ThermoFisher Scientific	Cat# AM2546
Mesh	SefarNitex	Cat# 03-25/19
VectaShield	Vector Laboratories	Cat# H-1200
FM4-64	ThermoFisher Scientific	Cat# T13320
Cycloheximide (CHX)	Sigma-Aldrich	Cat# C7698
ALEXA FLUOR 555 C2-MALEIMIDE	ThermoFisher Scientific	Cat# A20346
ALEXA FLUOR 647 C2-MALEIMIDE	ThermoFisher Scientific	Cat# A20347
DynaMag™-2 Magnet	ThermoFisher Scientific	Cat# 112321D
Phenol : chloroform : iso-amyl alcohol (25:24:1)	VWR	Cat# 136112-00-0
Acetosyringone	Sigma-Aldrich	Cat# D134406
PageRuler™ Plus Prestained Protein Ladder, 10 to 250 kDa	ThermoFisher Scientific	Cat# 26619
Eppendorf 1.5 mL Protein LoBind Microcentrifuge tubes	VWR	Cat# 525-0133
Bovine serum albumin (BSA)	Sigma-Aldrich	Cat# A7030
Deionized Formamide	Sigma-Aldrich	Cat# S4117
m-maleimidobenzoyl-N-hydroxysuccinimide ester (MBS)	ThermoFisher Scientific	Cat# 22311
2-fluoro-N-[2-(2-methyl-1H-indol-3-yl)ethyl]-benzamide (CK-666)	Sigma-Aldrich	Cat# SML0006
Phusion™ High-Fidelity DNA Polymerase & dNTP Mix	ThermoFisher Scientific	Cat# F530N
SuperScript III First Strand Synthesis System for RT-PCR	ThermoFisher Scientific	Cat# 18080-051
Maxima SYBR Green/Flouorescein qPCR Master Mix	ThermoFisher Scientific	Cat# K0243
Gateway® BP Clonase™ II Enzyme Mix	ThermoFisher Scientific	Cat# 11789-020
Gateway® LR Clonase® II Enzyme mix	ThermoFisher Scientific	Cat# 11791020
Colloidal blue staining	ThermoFisher Scientific	Cat# LC6025
ECL Prime Western Blotting Detection Reagent	Cytiva	Cat# GERPN2232
4-Methylumbelliferyl β-D-glucopyranoside	Sigma-Aldrich	Cat# M3633
HCS LipidTOX™ Deep Red neutral lipid stain	ThermoFisher Scientific	Cat# H34477
ER-Tracker™ Green (BODIPY™ FL Glibenclamide)	ThermoFisher Scientific	Cat# E34251
LysoTracker™ Red DND-99	ThermoFisher Scientific	Cat# L7528
BCECF/AM	Santa Cruz Biotechnology	Cat# sc-202492
2,3,5-Triphenyltetrazolium chloride	Santa Cruz Biotechnology	Cat# sc-206516
Software
Cytoscape v3.4.0	http://www.cytoscape.org	Shannon et al, 2003
FIJI	https://fiji.sc/	Schindelin et al., 2012
RootTrace	http://www.plant-image-analysis.org/ software/roottrace	French et al., 2009
JACoP	https://imagej.nih.gov/ij/plugins/track/ jacop.html	Bolte and Cordelieres, 2006
RootTrace	http://www.plant-image-analysis.org/ software/roottrace	French et al., 2009
Graphpad Prism 9	https://www.graphpad.com/scientific-software/prism/	Commercial
Adobe Photoshop 2023	https://www.adobe.com	Commercial
Search Tool for the Retrieval of Interacting Genes/Proteins	https://string-db.org	Freeware
R studio	https://www.rstudio.com/	Freeware
R v4.4.2	https://www.r-project.org	Freeware
Other
In Fusion HD Cloning Kit	Clonetech/Takara	Cat# 638909
SuperSignal Western Blot Enhancer	ThermoFisher Scientific	Cat# 46641
SuperSignal™ West Femto Maximum Sensitivity Substrate	ThermoFisher Scientific	Cat# 34094
SP8 LIGHTINING MODE CONFOCAL MICROSCOPE	https://www.leica-microsystems.com	Commercial
Phire Plant Direct PCR Master Mix	ThermoFisher Scientific	Cat# F160S
pENTR™/D-TOPO™ Cloning Kit	Thermo Fisher Scientific	Cat# K240020
GeneJET Plasmid Miniprep Kit	ThermoFisher Scientific	Cat# K0503
GeneJET Gel Extraction Kit	ThermoFisher Scientific	Cat# K0692
Thermo Scientific™ Orbitrap Fusion™ Lumos™ Tribrid™ Mass Spectrometer	https://www.thermofisher.com/order/catalog/product/IQLAAEGAAPFADBMBHQ	Commercial

## Sheet: Primers for mutant verification
DNA oligonucleotides used in this study for genotyping
Gene AGI	Gene name	Mutant		Name	Sequence 5'-3'	Application
-	-	-	-	SALK_LBb1.3	ATTTTGCCGATTTCGGAAC	Genotyping
-	-	-	-	SAIL_LB	GCCTTTTCAGAAATGGATAAATAGCCTTGCTTCC	Genotyping
-	-	-	-	GABI_LB_08760	GGGCTACACTGAATTGGTAGCTC	Genotyping
At1g79340	AtMCA-II-d	mca-II-d	SALK_127688	SALK_127688_LP	TGTTGGTTTCAATTGTTGGATC	Genotyping
				SALK_127688_RP	CAACAGGGATAAAAGGGCTTC	Genotyping
At5g04200	AtMCA-II-f	mca-II-f	GABI_540H06	GABI_540H06_RP	CCTCCAGCTCTCACTTCACAG	Genotyping
				GABI_540H06_RP	TACAATCACCACCGCCTCTAC	Genotyping
At1g79310	AtMCA-II-a	mca-II-a	CRISPR	Forward	CGAAAAAGGCGGTGCTTA	Sequencing
				Reverse	ACAATACACTCGTCGAAACC	Sequencing
At1g79330	AtMCA-II-b	mca-II-b	CRISPR	Forward	caATGGCGAAGAAAGCTG	Sequencing
				Reverse	CAACAATGCCCTTCGAAT	Sequencing
At1g79320	AtMCA-II-c	mca-II-c	CRISPR	Forward	AGAAAGCTTTACTGATTGGG	Sequencing
				Reverse	ATCGGAAGGAACAATACAC	Sequencing
At1g79340	AtMCA-II-d	mca-II-d	CRISPR	Forward	GCAAGAATGGCAAAGAGAG	Sequencing
				Reverse	GACAAAGCCTGACGGATG	Sequencing
At1g16420	AtMCA-II-e	mca-II-e	CRISPR	Forward	GCGAAGAAAGCACTTTTGA	Sequencing
				Reverse	AAAGACCAGAAAATCGCCA	Sequencing

## Sheet: Primers for cloning
DNA oligonucleotides used in this study for cloning
Gene AGI	Gene name	Name	Sequence 5'-3'	Application
At1g79310	MCA-II-a	Forward	GGGGACAAGTTTGTACAAAAAAGCAGGCTTAATGACGAAAAAGGCGGTGC	Cloning
		Reverse	GGGGACCACTTTGTACAAGAAAGCTGGGTTTCAACAGATGAAAGGAGCGTTG	Cloning
At1g79330	MCA-II-b	Forward	GGGGACAAGTTTGTACAAAAAAGCAGGCTTAATGGCGAAGAAAGCTGTGT	Cloning
		Reverse	GGGGACCACTTTGTACAAGAAAGCTGGGTTTTAACAAATAAACGGAGCATTCACAAAACT	Cloning
At3g27310	PUX1	Forward	CACCATGTTTGTTGATGACCCTTCTCTAC	Cloning
		Reverse	CATTTTAAACCACTTAGGCTTTGTGG	Cloning
At4g19790	PUX10	Forward	GGGGACAAGTTTGTACAAAAAAGCAGGCTTAATGGTTGATACTGTTGACAAATTAGGTTAC	Cloning
		Reverse	GGGGACCACTTTGTACAAGAAAGCTGGGTTGTTGATCTCGATGAAGAGACTTGC	Cloning
At3g09840	CDC48a	Forward	GGGGACAAGTTTGTACAAAAAAGCAGGCTTAATGTCTACCCCAGCTGAATCT	Cloning
		Reverse	GGGGACCACTTTGTACAAGAAAGCTGGGTTATTGTAGAGATCATCATCGTCCCC	Cloning

## Sheet: Primers used for CRISPR
DNA oligonucleotides used in this study for generating CRISPR mutant (Bold/underline is the binding site)
Gene AGI	Gene name	Mutant		Name	Sequence 5'-3'	Application
At1g79310	AtMCA-II-a	mca-II-a	CRISPR	Forward	tgtggtctcaATTGAGAACGGTGATGTTCTCCTGTTTAAGAGCTATGCTGGAA	gRNA assembly
				Reverse	tgtggtctcaAGCG AAAAAAAGCACCGACTC	gRNA assembly
At1g79330	AtMCA-II-b	mca-II-b	CRISPR	Forward	tgtggtctcaATTGTGGAACCAAGGCGGAGCTACGTTTAAGAGCTATGCTGGAA	gRNA assembly
				Reverse	tgtggtctcaAGCG AAAAAAAGCACCGACTC	gRNA assembly
At1g79320	AtMCA-II-c	mca-II-c	CRISPR	Forward	tgtggtctcaATTGAGAATCCGTACCGTTCGACGGTTTAAGAGCTATGCTGGAA	gRNA assembly
				Reverse	tgtggtctcaAGCG AAAAAAAGCACCGACTC	gRNA assembly
At1g79340	AtMCA-II-d	mca-II-d	CRISPR	Forward	tgtggtctcaATTGGAACCACGGAGGAGCTACAGTTTAAGAGCTATGCTGGAA	gRNA assembly
				Reverse	tgtggtctcaAGCG AAAAAAAGCACCGACTC	gRNA assembly
At1g16420	AtMCA-II-e	mca-II-e	CRISPR	Forward	tgtggtctcaATTGGAACCGCGGTGGAGTTACGGTTTAAGAGCTATGCTGGAA	gRNA assembly
				Reverse	tgtggtctcaAGCG AAAAAAAGCACCGACTC	gRNA assembly

## Sheet: Overhangs for Goldengate system
Goldengate overhangs for different level of vectors
Level 0 module (BsaI)	Promoter	A1	GGAG…......TACT
	5`UTR	A2	TACT…......AATG
	ORF	A3	AATG…......GCTT
	Ter	A4	GCTT…......CGCT
Level 1 vectors (BpiI)	pICSL11015	B1	TGCC…......GCAA
	pICH47811	B2	GCAA…......ACTA
	pICH7751	B3	ACTA…......TTAC
	pICH7761	B4	TTAC…......CAGA
	pICH7772	B5	CAGA…......TGTG
	pICH7781	B6	TGTG…......GAGC
	Linker	B7	GAGC…......TGCC
Level 2 vectors (BpiI)	pAGM4723	C1	GGTA…......CGCT
	pICSL4723	C1	GGTA…......CGCT

## Sheet: Primers for qRT-PCR
DNA oligonucleotides used in this study for qRT-PCR
Gene AGI	Gene name	Name	Sequence 5'-3'	Application
At1g79310	AtMCA-II-a	Forward	CGAAAAAGGCGGTGCTTA	qRT-PCR
		Reverse	ACAATACACTCGTCGAAACC	qRT-PCR
At1g79330	AtMCA-II-b	Forward	GCAAAAGTCCATGTCGTGAA	qRT-PCR
		Reverse	TGTTACCTGTATTTTGCTTGAGGA	qRT-PCR
At1g79320	AtMCA-II-c	Forward	GGGATCAACTACGTGGGAAC	qRT-PCR
		Reverse	CATCCGACGGACATCGTT	qRT-PCR
At1g79340	AtMCA-II-d	Forward	AGAGTCCCACCGGAAACA	qRT-PCR
		Reverse	TGTTCCACTAAATCCCTGAAATC	qRT-PCR
At1g16420	AtMCA-II-e	Forward	AGTGGACATGGCACGAGAA	qRT-PCR
		Reverse	CACCATTTCTCTAAATTGCTGGT	qRT-PCR
At5g04200	AtMCA-II-f	Forward	ACAGATCGGACCCTCTTCG	qRT-PCR
		Reverse	TCTTGTTCGTTGTCTCAATAGCC	qRT-PCR
AT5G09810	AtACT7	Forward	CCAGGAATTGCTGACCGTAT	qRT-PCR
		Reverse	GATTGATCCTCCGATCCAGA	qRT-PCR
AT2G42500	AtPP2A	Forward	TAACGTGGCCAAAATGATGC	qRT-PCR
		Reverse	GTTCTCCACAACCGCTTGGT	qRT-PCR
